# Supplementary material for: Identification of Shared Gene Signatures in Different Stages of Non-Alcoholic Fatty Liver Disease Using Integrated Microarray Dataset
Source: Research Square preprint supplement (doi:10.21203/rs.3.rs-130713/v1), 2020-12-23
Supplement: Supplementary file 1 [file be85282825e514710dd9e0b5.xlsx]

## Sheet: Dataset(SH)
Dataset item (Gene symbol )		Entrez ID	Gene symbol	Description	Alternate names	Chromosome	Map location
AAED1		195827	AAED1	AhpC/TSA antioxidant enzyme domain containing 1	C9orf21	9	9q22.32
ACVR2B		93	ACVR2B	activin A receptor, type IIB	ACTRIIB|ActR-IIB|HTX4	3	3p22
ADGRG3		222487	ADGRG3	adhesion G protein-coupled receptor G3	GPR97|PB99|PGR26	16	16q21
ADRB2		154	ADRB2	adrenoceptor beta 2, surface	ADRB2R|ADRBR|B2AR|BAR|BETA2AR	5	5q31-q32
ADSSL1		122622	ADSSL1	adenylosuccinate synthase like 1	-	14	14q32.33
AKAP12		9590	AKAP12	A kinase (PRKA) anchor protein 12	AKAP250|SSeCKS	6	6q24-q25
ALDOA		226	ALDOA	aldolase A, fructose-bisphosphate	ALDA|GSD12|HEL-S-87p	16	16p11.2
ALOX5		240	ALOX5	arachidonate 5-lipoxygenase	5-LO|5-LOX|5LPG|LOG5	10	10q11.2
ALOX5AP		241	ALOX5AP	arachidonate 5-lipoxygenase-activating protein	FLAP	13	13q12
ANXA1		301	ANXA1	annexin A1	ANX1|LPC1	9	9q21.13
ARHGAP30		257106	ARHGAP30	Rho GTPase activating protein 30	-	1	1q23.3
ARRDC3		57561	ARRDC3	arrestin domain containing 3	TLIMP	5	5q14.3
ARRDC4		91947	ARRDC4	arrestin domain containing 4	-	15	15q26.3
AVPR1A		552	AVPR1A	arginine vasopressin receptor 1A	AVPR V1a|AVPR1|V1aR	12	12q14-q15
BASP1		10409	BASP1	brain abundant, membrane attached signal protein 1	CAP-23|CAP23|NAP-22|NAP22	5	5p15.1
BAZ1A		11177	BAZ1A	bromodomain adjacent to zinc finger domain, 1A	ACF1|WALp1|WCRF180|hACF1	14	14q13.2
BBOX1		8424	BBOX1	butyrobetaine (gamma), 2-oxoglutarate dioxygenase (gamma-butyrobetaine hydroxylase) 1	BBH|BBOX|G-BBH|gamma-BBH	11	11p14.2
BCL2A1		597	BCL2A1	BCL2-related protein A1	ACC-1|ACC-2|ACC1|ACC2|BCL2L5|BFL1|GRS|HBPA1	15	15q24.3
BCL6		604	BCL6	B-cell CLL/lymphoma 6	BCL5|BCL6A|LAZ3|ZBTB27|ZNF51	3	3q27
BHLHE40		8553	BHLHE40	basic helix-loop-helix family, member e40	BHLHB2|DEC1|HLHB2|SHARP-2|STRA13|Stra14	3	3p26
BIRC3		330	BIRC3	baculoviral IAP repeat containing 3	AIP1|API2|CIAP2|HAIP1|HIAP1|MALT2|MIHC|RNF49|c-IAP2	11	11q22
C10orf10		11067	C10orf10	chromosome 10 open reading frame 10	DEPP|FIG|Fseg	10	10q11.21
C16orf54		283897	C16orf54	chromosome 16 open reading frame 54	-	16	16p11.2
C5AR1		728	C5AR1	complement component 5a receptor 1	C5A|C5AR|C5R1|CD88	19	19q13.3-q13.4
CASP7		840	CASP7	caspase 7, apoptosis-related cysteine peptidase	CASP-7|CMH-1|ICE-LAP3|LICE2|MCH3	10	10q25
CCDC71L		168455	CCDC71L	coiled-coil domain containing 71-like	C7orf74	7	7q22.3
CCL4		6351	CCL4	chemokine (C-C motif) ligand 4	ACT2|AT744.1|G-26|HC21|LAG-1|LAG1|MIP-1-beta|MIP1B|MIP1B1|SCYA2|SCYA4	17	17q12
CCR1		1230	CCR1	chemokine (C-C motif) receptor 1	CD191|CKR-1|CKR1|CMKBR1|HM145|MIP1aR|SCYAR1	3	3p21
CD44		960	CD44	CD44 molecule (Indian blood group)	CDW44|CSPG8|ECMR-III|HCELL|HUTCH-I|IN|LHR|MC56|MDU2|MDU3|MIC4|Pgp1	11	11p13
CD52		1043	CD52	CD52 molecule	CDW52	1	1p36
CD55		1604	CD55	CD55 molecule, decay accelerating factor for complement (Cromer blood group)	CR|CROM|DAF|TC	1	1q32
CD83		9308	CD83	CD83 molecule	BL11|HB15	6	6p23
CD93		22918	CD93	CD93 molecule	C1QR1|C1qR(P)|C1qRP|CDw93|ECSM3|MXRA4|dJ737E23.1	20	20p11.21
CDC42BPA		8476	CDC42BPA	CDC42 binding protein kinase alpha (DMPK-like)	MRCK|MRCKA|PK428	1	1q42.11
CDC42EP3		10602	CDC42EP3	CDC42 effector protein (Rho GTPase binding) 3	BORG2|CEP3|UB1	2	2p21
CDHR2		54825	CDHR2	cadherin-related family member 2	PCDH24|PCLKC	5	5q35.2
CECR2		27443	CECR2	cat eye syndrome chromosome region, candidate 2	-	22	22q11.2
CELSR2		1952	CELSR2	cadherin, EGF LAG seven-pass G-type receptor 2	ADGRC2|CDHF10|EGFL2|Flamingo1|MEGF3	1	1p21
CETP		1071	CETP	cholesteryl ester transfer protein, plasma	BPIFF|HDLCQ10	16	16q21
CFP		5199	CFP	complement factor properdin	BFD|PFC|PFD|PROPERDIN	X	Xp11.4
CHIC2		26511	CHIC2	cysteine-rich hydrophobic domain 2	BTL	4	4q11
CLC		1178	CLC	Charcot-Leyden crystal galectin	GAL10|Gal-10|LGALS10|LGALS10A|LPPL_HUMAN	19	19q13.1
CLEC4E		26253	CLEC4E	C-type lectin domain family 4, member E	CLECSF9|MINCLE	12	12p13.31
CLEC7A		64581	CLEC7A	C-type lectin domain family 7, member A	BGR|CANDF4|CD369|CLECSF12|DECTIN1	12	12p13.2
CLPTM1		1209	CLPTM1	cleft lip and palate associated transmembrane protein 1	-	19	19q13.3
CMTM2		146225	CMTM2	CKLF-like MARVEL transmembrane domain containing 2	CKLFSF2	16	16q21
CNDP1		84735	CNDP1	carnosine dipeptidase 1 (metallopeptidase M20 family)	CN1|CPGL2|HsT2308	18	18q22.3
CORO1A		11151	CORO1A	coronin, actin binding protein, 1A	CLABP|CLIPINA|HCORO1|IMD8|TACO|p57	16	16p11.2
COTL1		23406	COTL1	coactosin-like F-actin binding protein 1	CLP	16	16q24.1
CR1		1378	CR1	complement component (3b/4b) receptor 1 (Knops blood group)	C3BR|C4BR|CD35|KN	1	1q32
CSF2RB		1439	CSF2RB	colony stimulating factor 2 receptor, beta, low-affinity (granulocyte-macrophage)	CD131|CDw131|IL3RB|IL5RB|SMDP5	22	22q13.1
CSF3R		1441	CSF3R	colony stimulating factor 3 receptor (granulocyte)	CD114|GCSFR	1	1p35-p34.3
CST7		8530	CST7	cystatin F (leukocystatin)	CMAP	20	20p11.21
CXCL1		2919	CXCL1	chemokine (C-X-C motif) ligand 1 (melanoma growth stimulating activity, alpha)	FSP|GRO1|GROa|MGSA|MGSA-a|NAP-3|SCYB1	4	4q21
CXCL3		2921	CXCL3	chemokine (C-X-C motif) ligand 3	CINC-2b|GRO3|GROg|MIP-2b|MIP2B|SCYB3	4	4q21
CXCR2		3579	CXCR2	chemokine (C-X-C motif) receptor 2	CD182|CDw128b|CMKAR2|IL8R2|IL8RA|IL8RB	2	2q35
DEFA1B		728358	DEFA1B	defensin, alpha 1B	HNP-1|HP-1|HP1	8	8p23.1
DEFA3		1668	DEFA3	defensin, alpha 3, neutrophil-specific	DEF3|HNP-3|HNP3|HP-3|HP3	8	8p23.1
DEFA1		1667	DEFA1	defensin, alpha 1	DEF1|DEFA2|HNP-1|HP-1|HP1|MRS	8	8p23.1
DGAT2		84649	DGAT2	diacylglycerol O-acyltransferase 2	ARAT|GS1999FULL|HMFN1045	11	11q13.5
DHODH		1723	DHODH	dihydroorotate dehydrogenase (quinone)	DHOdehase|POADS|URA1	16	16q22
DNMBP		23268	DNMBP	dynamin binding protein	ARHGEF36|TUBA	10	10q24.2
DOK3		79930	DOK3	docking protein 3	DOKL	5	5q35.3
DPEP2		64174	DPEP2	dipeptidase 2	MBD2	16	16q22.1
DTX4		23220	DTX4	deltex 4, E3 ubiquitin ligase	RNF155	11	11q12.1
EFHD2		79180	EFHD2	EF-hand domain family, member D2	SWS1	1	1p36.21
ELMSAN1		91748	ELMSAN1	ELM2 and Myb/SANT-like domain containing 1	C14orf117|C14orf43|LSR68|MIDEAS|c14_5541	14	14q24.3
EMP1		2012	EMP1	epithelial membrane protein 1	CL-20|EMP-1|TMP	12	12p12.3
EMP3		2014	EMP3	epithelial membrane protein 3	YMP	19	19q13.3
ENO3		2027	ENO3	enolase 3 (beta, muscle)	GSD13|MSE	17	17p13.2
ERBB2		2064	ERBB2	erb-b2 receptor tyrosine kinase 2	CD340|HER-2|HER-2/neu|HER2|MLN 19|NEU|NGL|TKR1	17	17q12
ERGIC1		57222	ERGIC1	endoplasmic reticulum-golgi intermediate compartment 1	ERGIC-32|ERGIC32|NET24	5	5q35.1
EVI2B		2124	EVI2B	ecotropic viral integration site 2B	CD361|D17S376|EVDB	17	17q11.2
F2RL1		2150	F2RL1	coagulation factor II (thrombin) receptor-like 1	GPR11|PAR2	5	5q13
FADS2		9415	FADS2	fatty acid desaturase 2	D6D|DES6|FADSD6|LLCDL2|SLL0262|TU13	11	11q12.2
FAM101B		359845	FAM101B	family with sequence similarity 101, member B	CFM1	17	17p13
FAM102B		284611	FAM102B	family with sequence similarity 102, member B	SYM-3B	1	1p13.3
FAM107A		11170	FAM107A	family with sequence similarity 107, member A	DRR1|TU3A	3	3p21.1
FAM129A		116496	FAM129A	family with sequence similarity 129, member A	C1orf24|GIG39|NIBAN	1	1q25
FAM43A		131583	FAM43A	family with sequence similarity 43, member A	-	3	3q29
FAM65B		9750	FAM65B	family with sequence similarity 65, member B	C6orf32|DIFF40|DIFF48|MYONAP|PL48	6	6p22.3-p21.32
FASN		2194	FASN	fatty acid synthase	FAS|OA-519|SDR27X1	17	17q25
FCAMR		83953	FCAMR	Fc receptor, IgA, IgM, high affinity	CD351|FCA/MR|FKSG87	1	1q32.1
FCER1G		2207	FCER1G	Fc fragment of IgE, high affinity I, receptor for; gamma polypeptide	FCRG	1	1q23
FCGR2A		2212	FCGR2A	Fc fragment of IgG, low affinity IIa, receptor (CD32)	CD32|CD32A|CDw32|FCG2|FCGR2|FCGR2A1|FcGR|IGFR2	1	1q23
FCGR3B		2215	FCGR3B	Fc fragment of IgG, low affinity IIIb, receptor (CD16b)	CD16|CD16b|FCG3|FCGR3|FCR-10|FCRIII|FCRIIIb	1	1q23
FCN1		2219	FCN1	ficolin (collagen/fibrinogen domain containing) 1	FCNM	9	9q34
FGR		2268	FGR	FGR proto-oncogene, Src family tyrosine kinase	SRC2|c-fgr|c-src2|p55-Fgr|p55c-fgr|p58-Fgr|p58c-fgr	1	1p36.2-p36.1
FLT1		2321	FLT1	fms-related tyrosine kinase 1	FLT|FLT-1|VEGFR-1|VEGFR1	13	13q12
FOSL1		8061	FOSL1	FOS-like antigen 1	FRA|FRA1|fra-1	11	11q13
FOSL2		2355	FOSL2	FOS-like antigen 2	FRA2	2	2p23.3
FPR1		2357	FPR1	formyl peptide receptor 1	FMLP|FPR	19	19q13.4
FPR2		2358	FPR2	formyl peptide receptor 2	ALXR|FMLP-R-II|FMLPX|FPR2A|FPRH1|FPRH2|FPRL1|HM63|LXA4R	19	19q13.3-q13.4
FRAT2		23401	FRAT2	frequently rearranged in advanced T-cell lymphomas 2	-	10	10q24.1
G0S2		50486	G0S2	G0/G1 switch 2	-	1	1q32.2
GATA4		2626	GATA4	GATA binding protein 4	ASD2|TACHD|TOF|VSD1	8	8p23.1-p22
GATAD2A		54815	GATAD2A	GATA zinc finger domain containing 2A	p66alpha	19	19p13.11
GCA		25801	GCA	grancalcin, EF-hand calcium binding protein	GCL	2	2q24.2
GLIPR2		152007	GLIPR2	GLI pathogenesis-related 2	C9orf19|GAPR-1|GAPR1	9	9p13.3
GPR160		26996	GPR160	G protein-coupled receptor 160	GPCR1|GPCR150	3	3q26.2-q27
GPR27		2850	GPR27	G protein-coupled receptor 27	SREB1	3	3p21-p14
HAVCR2		84868	HAVCR2	hepatitis A virus cellular receptor 2	CD366|HAVcr-2|KIM-3|TIM3|TIMD-3|TIMD3|Tim-3	5	5q33.3
HCAR3		8843	HCAR3	hydroxycarboxylic acid receptor 3	GPR109B|HCA3|HM74|PUMAG|Puma-g	12	12q24.31
HCK		3055	HCK	HCK proto-oncogene, Src family tyrosine kinase	JTK9|p59Hck|p61Hck	20	20q11-q12
HIVEP1		3096	HIVEP1	human immunodeficiency virus type I enhancer binding protein 1	CIRIP|CRYBP1|GAAP|MBP-1|PRDII-BF1|Schnurri-1|ZAS1|ZNF40|ZNF40A	6	6p24-p22.3
HLA-DPA1		3113	HLA-DPA1	major histocompatibility complex, class II, DP alpha 1	DP(W3)|DP(W4)|HLA-DP1A|HLADP|HLASB|PLT1	6	6p21.3
HMGA1		3159	HMGA1	high mobility group AT-hook 1	HMG-R|HMGA1A|HMGIY	6	6p21
HMOX1		3162	HMOX1	heme oxygenase 1	HMOX1D|HO-1|HSP32|bK286B10	22	22q13.1
HSD17B14		51171	HSD17B14	hydroxysteroid (17-beta) dehydrogenase 14	DHRS10|SDR47C1|retSDR3	19	19q13.33
HSPA6		3310	HSPA6	heat shock 70kDa protein 6 (HSP70B')	-	1	1q23
ICAM1		3383	ICAM1	intercellular adhesion molecule 1	BB2|CD54|P3.58	19	19p13.3-p13.2
IL17RA		23765	IL17RA	interleukin 17 receptor A	CANDF5|CD217|CDw217|IL-17RA|IL17R|hIL-17R	22	22q11.1
IL18RAP		8807	IL18RAP	interleukin 18 receptor accessory protein	ACPL|CD218b|CDw218b|IL-18R-beta|IL-18RAcP|IL-18Rbeta|IL-1R-7|IL-1R7|IL-1RAcPL|IL18RB	2	2q12
IL1R2		7850	IL1R2	interleukin 1 receptor, type II	CD121b|CDw121b|IL-1R-2|IL-1RT-2|IL-1RT2|IL1R2c|IL1RB	2	2q12
IL1RN		3557	IL1RN	interleukin 1 receptor antagonist	DIRA|ICIL-1RA|IL-1RN|IL-1ra|IL-1ra3|IL1F3|IL1RA|IRAP|MVCD4	2	2q14.2
INAFM1		255783	INAFM1	InaF-motif containing 1	PRR24	19	19q13.32
IRF1		3659	IRF1	interferon regulatory factor 1	IRF-1|MAR	5	5q31.1
ITGAM		3684	ITGAM	integrin, alpha M (complement component 3 receptor 3 subunit)	CD11B|CR3A|MAC-1|MAC1A|MO1A|SLEB6	16	16p11.2
ITGB2		3689	ITGB2	integrin, beta 2 (complement component 3 receptor 3 and 4 subunit)	CD18|LAD|LCAMB|LFA-1|MAC-1|MF17|MFI7	21	21q22.3
ITPKC		80271	ITPKC	inositol-trisphosphate 3-kinase C	IP3-3KC|IP3KC	19	19q13.1
ITPRIP		85450	ITPRIP	inositol 1,4,5-trisphosphate receptor interacting protein	DANGER|KIAA1754|bA127L20|bA127L20.2	10	10q25.1
JUND		3727	JUND	jun D proto-oncogene	AP-1	19	19p13.2
KCNJ15		3772	KCNJ15	potassium channel, inwardly rectifying subfamily J, member 15	IRKK|KIR1.3|KIR4.2	21	21q22.2
KDM6B		23135	KDM6B	lysine (K)-specific demethylase 6B	JMJD3	17	17p13.1
KIAA0226L		80183	KIAA0226L	KIAA0226-like	C13orf18	13	13q14.13
KRT8		3856	KRT8	keratin 8, type II	CARD2|CK-8|CK8|CYK8|K2C8|K8|KO	12	12q13
LAPTM5		7805	LAPTM5	lysosomal protein transmembrane 5	CLAST6	1	1p34
LILRB2		10288	LILRB2	leukocyte immunoglobulin-like receptor, subfamily B (with TM and ITIM domains), member 2	CD85D|ILT-4|ILT4|LIR-2|LIR2|MIR-10|MIR10	19	19q13.4
LITAF		9516	LITAF	lipopolysaccharide-induced TNF factor	PIG7|SIMPLE|TP53I7	16	16p13.13
LMNB1		4001	LMNB1	lamin B1	ADLD|LMN|LMN2|LMNB	5	5q23.2
SOD2		6648	SOD2	superoxide dismutase 2, mitochondrial	IPOB|MNSOD|MVCD6	6	6q25.3
MAP2K3		5606	MAP2K3	mitogen-activated protein kinase kinase 3	MAPKK3|MEK3|MKK3|PRKMK3|SAPKK-2|SAPKK2	17	17q11.2
CREB5		9586	CREB5	cAMP responsive element binding protein 5	CRE-BPA|CREB-5	7	7p15.1
LPGAT1		9926	LPGAT1	lysophosphatidylglycerol acyltransferase 1	FAM34A|FAM34A1|NET8	1	1q32
LRRK2		120892	LRRK2	leucine-rich repeat kinase 2	AURA17|DARDARIN|PARK8|RIPK7|ROCO2	12	12q12
LSP1		4046	LSP1	lymphocyte-specific protein 1	WP34|pp52	11	11p15.5
LST1		7940	LST1	leukocyte specific transcript 1	B144|D6S49E|LST-1	6	6p21.3
LYN		4067	LYN	LYN proto-oncogene, Src family tyrosine kinase	JTK8|p53Lyn|p56Lyn	8	8q13
LYZ		4069	LYZ	lysozyme	LZM	12	12q15
MAMDC4		158056	MAMDC4	MAM domain containing 4	AEGP	9	9q34.3
MAP1LC3A		84557	MAP1LC3A	microtubule-associated protein 1 light chain 3 alpha	ATG8E|LC3|LC3A|MAP1ALC3|MAP1BLC3	20	20q11.22
MAP3K14		9020	MAP3K14	mitogen-activated protein kinase kinase kinase 14	FTDCR1B|HS|HSNIK|NIK	17	17q21
METRNL		284207	METRNL	meteorin, glial cell differentiation regulator-like	-	17	17q25.3
MGAM		8972	MGAM	maltase-glucoamylase	MG|MGA	7	7q34
MID1IP1		58526	MID1IP1	MID1 interacting protein 1	G12-like|MIG12|S14R|STRAIT11499|THRSPL	X	Xp11.4
MIDN		90007	MIDN	midnolin	-	19	19p13.3
ZC3H12A		80149	ZC3H12A	zinc finger CCCH-type containing 12A	MCPIP|MCPIP1|dJ423B22.1	1	1p34.3
SLC16A3		9123	SLC16A3	solute carrier family 16 (monocarboxylate transporter), member 3	MCT 3|MCT 4|MCT-3|MCT-4|MCT3|MCT4	17	17q25
BCL3		602	BCL3	B-cell CLL/lymphoma 3	BCL4|D19S37	19	19q13.1-q13.2
MLXIP		22877	MLXIP	MLX interacting protein	MIR|MONDOA|bHLHe36	12	12q24.31
MMP19		4327	MMP19	matrix metallopeptidase 19	MMP18|RASI-1	12	12q14
MMP25		64386	MMP25	matrix metallopeptidase 25	MMP-25|MMP20|MMP20A|MMPL1|MT-MMP 6|MT-MMP6|MT6-MMP|MT6MMP|MTMMP6	16	16p13.3
MMP9		4318	MMP9	matrix metallopeptidase 9	CLG4B|GELB|MANDP2|MMP-9	20	20q13.12
MNDA		4332	MNDA	myeloid cell nuclear differentiation antigen	PYHIN3	1	1q22
MOB3A		126308	MOB3A	MOB kinase activator 3A	MOB1C|MOBKL2A|moblak	19	19p13.3
MPEG1		219972	MPEG1	macrophage expressed 1	MPG1|MPS1|Mpg-1	11	11q12.1
MPND		84954	MPND	MPN domain containing	-	19	19p13.3
MX2		4600	MX2	MX dynamin-like GTPase 2	MXB	21	21q22.3
MXD1		4084	MXD1	MAX dimerization protein 1	BHLHC58|MAD|MAD1	2	2p13-p12
MYADM		91663	MYADM	myeloid-associated differentiation marker	SB135	19	19q13.42
MYO1F		4542	MYO1F	myosin IF	-	19	19p13.3-p13.2
NABP1		64859	NABP1	nucleic acid binding protein 1	OBFC2A|SOSS-B2|SSB2	2	2q32.3
NCF1		653361	NCF1	neutrophil cytosolic factor 1	NCF1A|NOXO2|SH3PXD1A|p47phox	7	7q11.23
NCF2		4688	NCF2	neutrophil cytosolic factor 2	NCF-2|NOXA2|P67-PHOX|P67PHOX	1	1q25
NCF4		4689	NCF4	neutrophil cytosolic factor 4, 40kDa	NCF|P40PHOX|SH3PXD4	22	22q13.1
NFATC2		4773	NFATC2	nuclear factor of activated T-cells, cytoplasmic, calcineurin-dependent 2	NFAT1|NFATP	20	20q13.2
NFIL3		4783	NFIL3	nuclear factor, interleukin 3 regulated	E4BP4|IL3BP1|NF-IL3A|NFIL3A	9	9q22
NRIP1		8204	NRIP1	nuclear receptor interacting protein 1	RIP140	21	21q11.2
PADI4		23569	PADI4	peptidyl arginine deiminase, type IV	PAD|PAD4|PADI5|PDI4|PDI5	1	1p36.13
PDE11A		50940	PDE11A	phosphodiesterase 11A	PPNAD2	2	2q31.2
PDE4B		5142	PDE4B	phosphodiesterase 4B, cAMP-specific	DPDE4|PDEIVB	1	1p31
PECAM1		5175	PECAM1	platelet/endothelial cell adhesion molecule 1	CD31|CD31/EndoCAM|GPIIA'|PECA1|PECAM-1|endoCAM	17	17q23.3
PEG10		23089	PEG10	paternally expressed 10	EDR|HB-1|MEF3L|Mar2|Mart2|RGAG3	7	7q21
PILRA		29992	PILRA	paired immunoglobin-like type 2 receptor alpha	FDF03	7	7q22.1
PIM1		5292	PIM1	Pim-1 proto-oncogene, serine/threonine kinase	PIM	6	6p21.2
PIM3		415116	PIM3	Pim-3 proto-oncogene, serine/threonine kinase	pim-3	22	22q13
PKLR		5313	PKLR	pyruvate kinase, liver and RBC	PK1|PKL|PKR|PKRL|RPK	1	1q21
PLAUR		5329	PLAUR	plasminogen activator, urokinase receptor	CD87|U-PAR|UPAR|URKR	19	19q13
PLBD1		79887	PLBD1	phospholipase B domain containing 1	-	12	12p13.1
PLEK		5341	PLEK	pleckstrin	P47	2	2p13.3
PLEKHO2		80301	PLEKHO2	pleckstrin homology domain containing, family O member 2	PLEKHQ1|PP1628|pp9099	15	15q22.1
PLIN1		5346	PLIN1	perilipin 1	FPLD4|PERI|PLIN	15	15q26
PLK2		10769	PLK2	polo-like kinase 2	SNK|hPlk2|hSNK	5	5q12.1-q13.2
PLXNC1		10154	PLXNC1	plexin C1	CD232|PLXN-C1|VESPR	12	12q23.3
PNRC1		10957	PNRC1	proline-rich nuclear receptor coactivator 1	B4-2|PNAS-145|PROL2|PRR2	6	6q15
PPP1R15A		23645	PPP1R15A	protein phosphatase 1, regulatory subunit 15A	GADD34	19	19q13.2
PPP1R18		170954	PPP1R18	protein phosphatase 1, regulatory subunit 18	HKMT1098|KIAA1949	6	6p21.3
PPP3R1		5534	PPP3R1	protein phosphatase 3, regulatory subunit B, alpha	CALNB1|CNB|CNB1	2	2p15
PPRC1		23082	PPRC1	peroxisome proliferator-activated receptor gamma, coactivator-related 1	PRC	10	10q24.32
PRAP1		118471	PRAP1	proline-rich acidic protein 1	PRO1195|UPA	10	10q26.3
PRKCI		5584	PRKCI	protein kinase C, iota	DXS1179E|PKCI|nPKC-iota	3	3q26.3
PROK2		60675	PROK2	prokineticin 2	BV8|HH4|KAL4|MIT1|PK2	3	3p13
PTPN1		5770	PTPN1	protein tyrosine phosphatase, non-receptor type 1	PTP1B	20	20q13.1-q13.2
PTPRE		5791	PTPRE	protein tyrosine phosphatase, receptor type, E	HPTPE|PTPE|R-PTP-EPSILON	10	10q26
QPCT		25797	QPCT	glutaminyl-peptide cyclotransferase	GCT|QC|sQC	2	2p22.2
R3HDM4		91300	R3HDM4	R3H domain containing 4	C19orf22	19	19p13.3
RAB11FIP1		80223	RAB11FIP1	RAB11 family interacting protein 1 (class I)	NOEL1A|RCP|rab11-FIP1	8	8p11.22
RAB20		55647	RAB20	RAB20, member RAS oncogene family	-	13	13q34
RAB26		25837	RAB26	RAB26, member RAS oncogene family	V46133	16	16p13.3
RAB5C		5878	RAB5C	RAB5C, member RAS oncogene family	L1880|RAB5CL|RAB5L|RABL	17	17q21.2
RAC2		5880	RAC2	ras-related C3 botulinum toxin substrate 2 (rho family, small GTP binding protein Rac2)	EN-7|Gx|HSPC022|p21-Rac2	22	22q13.1
RALGDS		5900	RALGDS	ral guanine nucleotide dissociation stimulator	RGDS|RGF|RalGEF	9	9q34.3
RASSF2		9770	RASSF2	Ras association (RalGDS/AF-6) domain family member 2	CENP-34|RASFADIN	20	20p13
RASSF5		83593	RASSF5	Ras association (RalGDS/AF-6) domain family member 5	Maxp1|NORE1|NORE1A|NORE1B|RAPL|RASSF3	1	1q32.1
RELB		5971	RELB	v-rel avian reticuloendotheliosis viral oncogene homolog B	I-REL|IREL|REL-B	19	19q13.32
RFX2		5990	RFX2	regulatory factor X, 2 (influences HLA class II expression)	-	19	19p13.3
RIPK4		54101	RIPK4	receptor-interacting serine-threonine kinase 4	ANKK2|ANKRD3|DIK|NKRD3|PKK|PPS2|RIP4	21	21q22.3
RND1		27289	RND1	Rho family GTPase 1	ARHS|RHO6|RHOS	12	12q12
RNF19B		127544	RNF19B	ring finger protein 19B	IBRDC3|NKLAM	1	1p35.1
RPS6KA5		9252	RPS6KA5	ribosomal protein S6 kinase, 90kDa, polypeptide 5	MSK1|MSPK1|RLPK	14	14q31-q32.1
S100A11		6282	S100A11	S100 calcium binding protein A11	HEL-S-43|MLN70|S100C	1	1q21
S100A12		6283	S100A12	S100 calcium binding protein A12	CAAF1|CAGC|CGRP|ENRAGE|MRP-6|MRP6|p6	1	1q21
S100A4		6275	S100A4	S100 calcium binding protein A4	18A2|42A|CAPL|FSP1|MTS1|P9KA|PEL98	1	1q21
S100A6		6277	S100A6	S100 calcium binding protein A6	2A9|5B10|CABP|CACY|PRA	1	1q21
S100A8		6279	S100A8	S100 calcium binding protein A8	60B8AG|CAGA|CFAG|CGLA|CP-10|L1Ag|MA387|MIF|MRP8|NIF|P8	1	1q21
S100A9		6280	S100A9	S100 calcium binding protein A9	60B8AG|CAGB|CFAG|CGLB|L1AG|LIAG|MAC387|MIF|MRP14|NIF|P14	1	1q21
S100P		6286	S100P	S100 calcium binding protein P	MIG9	4	4p16
SBNO2		22904	SBNO2	strawberry notch homolog 2 (Drosophila)	KIAA0963|SNO|STNO	19	19p13.3
SDC4		6385	SDC4	syndecan 4	SYND4	20	20q12
SEC14L1		6397	SEC14L1	SEC14-like 1 (S. cerevisiae)	PRELID4A|SEC14L	17	17q25.2
SELL		6402	SELL	selectin L	CD62L|LAM1|LECAM1|LEU8|LNHR|LSEL|LYAM1|PLNHR|TQ1	1	1q24.2
SERPINB9		5272	SERPINB9	serpin peptidase inhibitor, clade B (ovalbumin), member 9	CAP-3|CAP3|PI-9|PI9	6	6p25
SERTAD1		29950	SERTAD1	SERTA domain containing 1	SEI1|TRIP-Br1	19	19q13.1-q13.2
SGCE		8910	SGCE	sarcoglycan, epsilon	DYT11|ESG	7	7q21.3
SGMS2		166929	SGMS2	sphingomyelin synthase 2	SMS2	4	4q25
SIGIRR		59307	SIGIRR	single immunoglobulin and toll-interleukin 1 receptor (TIR) domain	TIR8	11	11p15.5
SIN3A		25942	SIN3A	SIN3 transcription regulator family member A	-	15	15q24.2
SLA		6503	SLA	Src-like-adaptor	SLA1|SLAP	8	8q24
SLC11A1		6556	SLC11A1	solute carrier family 11 (proton-coupled divalent metal ion transporter), member 1	LSH|NRAMP|NRAMP1	2	2q35
SLC16A6		9120	SLC16A6	solute carrier family 16, member 6	MCT6|MCT7	17	17q24.2
SLC25A37		51312	SLC25A37	solute carrier family 25 (mitochondrial iron transporter), member 37	HT015|MFRN|MFRN1|MSC|MSCP|PRO1278|PRO1584|PRO2217	8	8p21.2
SLC2A14		144195	SLC2A14	solute carrier family 2 (facilitated glucose transporter), member 14	GLUT14|SLC2A3P3	12	12p13.31
SLC2A3		6515	SLC2A3	solute carrier family 2 (facilitated glucose transporter), member 3	GLUT3	12	12p13.3
SLC6A6		6533	SLC6A6	solute carrier family 6 (neurotransmitter transporter), member 6	TAUT	3	3p25.1
SOCS3		9021	SOCS3	suppressor of cytokine signaling 3	ATOD4|CIS3|Cish3|SOCS-3|SSI-3|SSI3	17	17q25.3
SORT1		6272	SORT1	sortilin 1	Gp95|LDLCQ6|NT3	1	1p13.3|1p21.3-p13.1
SOX17		64321	SOX17	SRY (sex determining region Y)-box 17	VUR3	8	8q11.23
SOX7		83595	SOX7	SRY (sex determining region Y)-box 7	-	8	8p23.1
SP1		6667	SP1	Sp1 transcription factor	-	12	12q13.1
SPIDR		23514	SPIDR	scaffolding protein involved in DNA repair	KIAA0146	8	8q11.21
SPSB1		80176	SPSB1	splA/ryanodine receptor domain and SOCS box containing 1	SSB-1|SSB1	1	1p36.22
SRD5A2		6716	SRD5A2	steroid-5-alpha-reductase, alpha polypeptide 2 (3-oxo-5 alpha-steroid delta 4-dehydrogenase alpha 2)	-	2	2p23
STAT3		6774	STAT3	signal transducer and activator of transcription 3 (acute-phase response factor)	ADMIO|APRF|HIES	17	17q21.31
STC1		6781	STC1	stanniocalcin 1	STC	8	8p21.2
SYT12		91683	SYT12	synaptotagmin XII	SYT11|sytXII	11	11q13.2
TAGAP		117289	TAGAP	T-cell activation RhoGTPase activating protein	ARHGAP47|FKSG15|IDDM21|TAGAP1	6	6q25.3
TAGLN2		8407	TAGLN2	transgelin 2	HA1756	1	1q21-q25
TGFB1		7040	TGFB1	transforming growth factor, beta 1	CED|DPD1|LAP|TGFB|TGFbeta	19	19q13.1
THEMIS2		9473	THEMIS2	thymocyte selection associated family member 2	C1orf38|ICB-1	1	1p35.3
TIE1		7075	TIE1	tyrosine kinase with immunoglobulin-like and EGF-like domains 1	JTK14|TIE	1	1p34-p33
TIMD4		91937	TIMD4	T-cell immunoglobulin and mucin domain containing 4	SMUCKLER|TIM4	5	5q33.3
TLE3		7090	TLE3	transducin-like enhancer of split 3	ESG|ESG3|GRG3|HsT18976	15	15q22
TLR1		7096	TLR1	toll-like receptor 1	CD281|TIL|TIL. LPRS5|rsc786	4	4p14
TLR2		7097	TLR2	toll-like receptor 2	CD282|TIL4	4	4q32
TLR8		51311	TLR8	toll-like receptor 8	CD288	X	Xp22
TM6SF2		53345	TM6SF2	transmembrane 6 superfamily member 2	-	19	19p13.3-p12
TMEM154		201799	TMEM154	transmembrane protein 154	-	4	4q31.3
TMEM71		137835	TMEM71	transmembrane protein 71	-	8	8q24.22
TNFAIP6		7130	TNFAIP6	tumor necrosis factor, alpha-induced protein 6	TSG-6|TSG6	2	2q23.3
TNFRSF10C		8794	TNFRSF10C	tumor necrosis factor receptor superfamily, member 10c, decoy without an intracellular domain	CD263|DCR1|DCR1-TNFR|LIT|TRAIL-R3|TRAILR3|TRID	8	8p22-p21
TPPP		11076	TPPP	tubulin polymerization promoting protein	TPPP/p25|TPPP1|p24|p25|p25alpha	5	5p15.3
TPSAB1		7177	TPSAB1	tryptase alpha/beta 1	TPS1|TPS2|TPSB1	16	16p13.3
TPSB2		64499	TPSB2	tryptase beta 2 (gene/pseudogene)	TPS2|tryptaseB|tryptaseC	16	16p13.3
TRAF4		9618	TRAF4	TNF receptor-associated factor 4	CART1|MLN62|RNF83	17	17q11-q12
TREM1		54210	TREM1	triggering receptor expressed on myeloid cells 1	CD354|TREM-1	6	6p21.1
TSLP		85480	TSLP	thymic stromal lymphopoietin	-	5	5q22.1
UBE2QL1		134111	UBE2QL1	ubiquitin-conjugating enzyme E2Q family-like 1	-	5	5p15.31
UGCG		7357	UGCG	UDP-glucose ceramide glucosyltransferase	GCS|GLCT1	9	9q31
VASP		7408	VASP	vasodilator-stimulated phosphoprotein	-	19	19q13.32
VNN2		8875	VNN2	vanin 2	FOAP-4|GPI-80	6	6q23-q24
VNN3		55350	VNN3	vanin 3	HSA238982	6	6q23.2
WASL		8976	WASL	Wiskott-Aldrich syndrome-like	N-WASP|NWASP|WASPB	7	7q31.3
WNT11		7481	WNT11	wingless-type MMTV integration site family, member 11	HWNT11	11	11q13.5
YBX3		8531	YBX3	Y box binding protein 3	CSDA|CSDA1|DBPA|ZONAB	12	12p13.1
ZBTB21		49854	ZBTB21	zinc finger and BTB domain containing 21	ZNF295	21	21q22.3
ZBTB43		23099	ZBTB43	zinc finger and BTB domain containing 43	ZBTB22B|ZNF-X|ZNF297B	9	9q33.3
ZFP36L2		678	ZFP36L2	ZFP36 ring finger protein-like 2	BRF2|ERF-2|ERF2|RNF162C|TIS11D	2	2p22.3-p21
ZNF217		7764	ZNF217	zinc finger protein 217	ZABC1	20	20q13.2
ZYX		7791	ZYX	zyxin	ESP-2|HED-2	7	7q32
ABCB11		8647	ABCB11	ATP-binding cassette, sub-family B (MDR/TAP), member 11	ABC16|BRIC2|BSEP|PFIC-2|PFIC2|PGY4|SPGP	2	2q24
AHSA2		130872	AHSA2	AHA1, activator of heat shock 90kDa protein ATPase homolog 2 (yeast)	Hch1	2	2p15
AUTS2		26053	AUTS2	autism susceptibility candidate 2	FBRSL2|MRD26	7	7q11.22
CANX		821	CANX	calnexin	CNX|IP90|P90	5	5q35
CBX5		23468	CBX5	chromobox homolog 5	HEL25|HP1|HP1A	12	12q13.13
CLIC4		25932	CLIC4	chloride intracellular channel 4	CLIC4L|H1|MTCLIC|huH1|p64H1	1	1p36.11
CNTN3		5067	CNTN3	contactin 3 (plasmacytoma associated)	BIG-1|PANG|PCS	3	3p12.3
COL1A2		1278	COL1A2	collagen, type I, alpha 2	OI4	7	7q22.1
CPD		1362	CPD	carboxypeptidase D	GP180	17	17q11.2
CYP2C9		1559	CYP2C9	cytochrome P450, family 2, subfamily C, polypeptide 9	CPC9|CYP2C|CYP2C10|CYPIIC9|P450IIC9	10	10q24
CYP3A5		1577	CYP3A5	cytochrome P450, family 3, subfamily A, polypeptide 5	CP35|CYPIIIA5|P450PCN3|PCN3	7	7q21.1
EFEMP1		2202	EFEMP1	EGF containing fibulin-like extracellular matrix protein 1	DHRD|DRAD|FBLN3|FBNL|FIBL-3|MLVT|MTLV|S1-5	2	2p16
FANCL		55120	FANCL	Fanconi anemia, complementation group L	FAAP43|PHF9|POG	2	2p16.1
GLT8D1		55830	GLT8D1	glycosyltransferase 8 domain containing 1	AD-017|MSTP139	3	3p21.1
GSTT1		2952	GSTT1	glutathione S-transferase theta 1	-	22	22q11.23
HLA-DQA1		3117	HLA-DQA1	major histocompatibility complex, class II, DQ alpha 1	CD|CELIAC1|DQ-A1|GSE|HLA-DQA	6	6p21.3
HMBOX1		79618	HMBOX1	homeobox containing 1	HNF1LA|HOT1|PBHNF	8	8p21.1
HSP90B1		7184	HSP90B1	heat shock protein 90kDa beta (Grp94), member 1	ECGP|GP96|GRP94|HEL-S-125m|HEL35|TRA1	12	12q24.2-q24.3
KLF3		51274	KLF3	Kruppel-like factor 3 (basic)	BKLF	4	4p14
LMAN1		3998	LMAN1	lectin, mannose-binding, 1	ERGIC-53|ERGIC53|F5F8D|FMFD1|MCFD1|MR60|gp58	18	18q21.3-q22
FLRT2		23768	FLRT2	fibronectin leucine rich transmembrane protein 2	-	14	14q24-q32
PAH		5053	PAH	phenylalanine hydroxylase	PH|PKU|PKU1	12	12q22-q24.2
LPP		4026	LPP	LIM domain containing preferred translocation partner in lipoma	-	3	3q28
MAF		4094	MAF	v-maf avian musculoaponeurotic fibrosarcoma oncogene homolog	AYGRP|CCA4|CTRCT21|c-MAF	16	16q22-q23
MANEA		79694	MANEA	mannosidase, endo-alpha	ENDO|hEndo	6	6q16.1
MCFD2		90411	MCFD2	multiple coagulation factor deficiency 2	F5F8D|F5F8D2|LMAN1IP|SDNSF	2	2p21
MEIS2		4212	MEIS2	Meis homeobox 2	HsT18361|MRG1	15	15q14
EIF4A2		1974	EIF4A2	eukaryotic translation initiation factor 4A2	BM-010|DDX2B|EIF4A|EIF4F|eIF-4A-II|eIF4A-II	3	3q28
MTMR4		9110	MTMR4	myotubularin related protein 4	FYVE-DSP2|ZFYVE11	17	17q22
MUM1		84939	MUM1	melanoma associated antigen (mutated) 1	EXPAND1|HSPC211|MUM-1	19	19p13.3
NAPEPLD		222236	NAPEPLD	N-acyl phosphatidylethanolamine phospholipase D	FMP30|NAPE-PLD	7	7q22.1
NAT2		10	NAT2	N-acetyltransferase 2 (arylamine N-acetyltransferase)	AAC2|NAT-2|PNAT	8	8p22
NHSL1		57224	NHSL1	NHS-like 1	C6orf63	6	6q23.3
NT5E		4907	NT5E	5'-nucleotidase, ecto (CD73)	CALJA|CD73|E5NT|NT|NT5|NTE|eN|eNT	6	6q14-q21
PCMTD1		115294	PCMTD1	protein-L-isoaspartate (D-aspartate) O-methyltransferase domain containing 1	-	8	8q11.23
PREPL		9581	PREPL	prolyl endopeptidase-like	-	2	2p21
PTPRS		5802	PTPRS	protein tyrosine phosphatase, receptor type, S	PTPSIGMA	19	19p13.3
RAP1GDS1		5910	RAP1GDS1	RAP1, GTP-GDP dissociation stimulator 1	GDS1|SmgGDS	4	4q23-q25
RTP3		83597	RTP3	receptor (chemosensory) transporter protein 3	LTM1|TMEM7|Z3CXXC3	3	3p21.3
SEC22B		9554	SEC22B	SEC22 vesicle trafficking protein homolog B (S. cerevisiae) (gene/pseudogene)	ERS-24|SEC22L1	1	1q21.1
SEC61A1		29927	SEC61A1	Sec61 alpha 1 subunit (S. cerevisiae)	HSEC61|SEC61|SEC61A	3	3q21.3
SEC63		11231	SEC63	SEC63 homolog (S. cerevisiae)	DNAJC23|ERdj2|PRO2507|SEC63L	6	6q21
SEPSECS		51091	SEPSECS	Sep (O-phosphoserine) tRNA:Sec (selenocysteine) tRNA synthase	LP|PCH2D|SLA|SLA/LP	4	4p15.2
SLC33A1		9197	SLC33A1	solute carrier family 33 (acetyl-CoA transporter), member 1	ACATN|AT-1|AT1|CCHLND|SPG42	3	3q25.31
SLC39A8		64116	SLC39A8	solute carrier family 39 (zinc transporter), member 8	BIGM103|LZT-Hs6|PP3105|ZIP8	4	4q24
SYT17		51760	SYT17	synaptotagmin XVII	sytXVII	16	16p12.3
TIA1		7072	TIA1	TIA1 cytotoxic granule-associated RNA binding protein	TIA-1|WDM	2	2p13
TIGD2		166815	TIGD2	tigger transposable element derived 2	HEL106	4	4q22.1
TMED2		10959	TMED2	transmembrane emp24 domain trafficking protein 2	P24A|RNP24|p24	12	12q24.31
TMEM50B		757	TMEM50B	transmembrane protein 50B	C21orf4|HCVP7TP3	21	21q22.11
TOB1		10140	TOB1	transducer of ERBB2, 1	APRO6|PIG49|TOB|TROB|TROB1	17	17q21
TRAM1		23471	TRAM1	translocation associated membrane protein 1	PNAS8|TRAM|TRAMP	8	8q13.3
TSPAN8		7103	TSPAN8	tetraspanin 8	CO-029|TM4SF3	12	12q14.1-q21.1
TWF1		5756	TWF1	twinfilin actin binding protein 1	A6|PTK9	12	12q12
WDR72		256764	WDR72	WD repeat domain 72	AI2A3	15	15q21.3
WNK3		65267	WNK3	WNK lysine deficient protein kinase 3	PRKWNK3	X	Xp11.22
ZNF385B		151126	ZNF385B	zinc finger protein 385B	ZNF533	2	2q31.2-q31.3
ZNF652		22834	ZNF652	zinc finger protein 652	-	17	17q21.32
NCAM2		4685	NCAM2	neural cell adhesion molecule 2	NCAM21	21	21q21.1
GRID1		2894	GRID1	glutamate receptor, ionotropic, delta 1	GluD1	10	10q22
MEP1B		4225	MEP1B	meprin A, beta	-	18	18q12.2-q12.3
ALPK2		115701	ALPK2	alpha-kinase 2	HAK	18	18q21.31
MT1H		4496	MT1H	metallothionein 1H	MT-0|MT-1H|MT-IH|MT1	16	16q13
CYP7A1		1581	CYP7A1	cytochrome P450, family 7, subfamily A, polypeptide 1	CP7A|CYP7|CYPVII	8	8q11-q12
P4HA1		5033	P4HA1	prolyl 4-hydroxylase, alpha polypeptide I	P4HA	10	10q22.1
IGFBP2		3485	IGFBP2	insulin-like growth factor binding protein 2, 36kDa	IBP2|IGF-BP53	2	2q35
MYC		4609	MYC	v-myc avian myelocytomatosis viral oncogene homolog	MRTL|MYCC|bHLHe39|c-Myc	8	8q24.21
GDF15		9518	GDF15	growth differentiation factor 15	GDF-15|MIC-1|MIC1|NAG-1|PDF|PLAB|PTGFB	19	19p13.11
IGFBP1		3484	IGFBP1	insulin-like growth factor binding protein 1	AFBP|IBP1|IGF-BP25|PP12|hIGFBP-1	7	7p12.3
FOSB		2354	FOSB	FBJ murine osteosarcoma viral oncogene homolog B	AP-1|G0S3|GOS3|GOSB	19	19q13.32
FOS		2353	FOS	FBJ murine osteosarcoma viral oncogene homolog	AP-1|C-FOS|p55	14	14q24.3
ABCC6		368	ABCC6	ATP-binding cassette, sub-family C (CFTR/MRP), member 6	ABC34|ARA|EST349056|GACI2|MLP1|MOAT-E|MOATE|MRP6|PXE|PXE1|URG7	16	16p13.1
ABCG8		64241	ABCG8	ATP-binding cassette, sub-family G (WHITE), member 8	GBD4|STSL	2	2p21
ACBD5		91452	ACBD5	acyl-CoA binding domain containing 5	-	10	10p12.1
ACSS2		55902	ACSS2	acyl-CoA synthetase short-chain family member 2	ACAS2|ACECS|ACS|ACSA|dJ1161H23.1	20	20q11.22
AFP		174	AFP	alpha-fetoprotein	AFPD|FETA|HPAFP	4	4q13.3
AGBL5		60509	AGBL5	ATP/GTP binding protein-like 5	CCP5	2	2p23.3
AMOT		154796	AMOT	angiomotin	-	X	Xq23
ANKS4B		257629	ANKS4B	ankyrin repeat and sterile alpha motif domain containing 4B	HARP	16	16p12.2
ANXA9		8416	ANXA9	annexin A9	ANX31	1	1q21
ASCL2		430	ASCL2	achaete-scute family bHLH transcription factor 2	ASH2|HASH2|MASH2|bHLHa45	11	11p15.5
ASPM		259266	ASPM	asp (abnormal spindle) homolog, microcephaly associated (Drosophila)	ASP|Calmbp1|MCPH5	1	1q31
BRCA1		672	BRCA1	breast cancer 1, early onset	BRCAI|BRCC1|BROVCA1|FANCS|IRIS|PNCA4|PPP1R53|PSCP|RNF53	17	17q21
BTBD11		121551	BTBD11	BTB (POZ) domain containing 11	ABTB2B	12	12q23.3
C11orf52		91894	C11orf52	chromosome 11 open reading frame 52	-	11	11q23.1
C14orf80		283643	C14orf80	chromosome 14 open reading frame 80	-	14	14q32.33
C19orf44		84167	C19orf44	chromosome 19 open reading frame 44	-	19	19p13.11
C2orf54		79919	C2orf54	chromosome 2 open reading frame 54	-	2	2q37.3
C2orf82		389084	C2orf82	chromosome 2 open reading frame 82	UNQ830	2	2q37.1
C9orf24		84688	C9orf24	chromosome 9 open reading frame 24	CBE1|NYD-SP22|SMRP1|bA573M23.4	9	9p13.3
CCDC121		79635	CCDC121	coiled-coil domain containing 121	-	2	2p23.3
CCDC150		284992	CCDC150	coiled-coil domain containing 150	-	2	2q33.1
CCL14		6358	CCL14	chemokine (C-C motif) ligand 14	CC-1|CC-3|CKB1|HCC-1|HCC-1(1-74)|HCC-1/HCC-3|HCC-3|MCIF|NCC-2|NCC2|SCYA14|SCYL2|SY14	17	17q12
CD160		11126	CD160	CD160 molecule	BY55|NK1|NK28	1	1q21.1
CDH15		1013	CDH15	cadherin 15, type 1, M-cadherin (myotubule)	CDH14|CDH3|CDHM|MCAD|MRD3	16	16q24.3
CEBPA		1050	CEBPA	CCAAT/enhancer binding protein (C/EBP), alpha	C/EBP-alpha|CEBP	19	19q13.1
CENPQ		55166	CENPQ	centromere protein Q	C6orf139|CENP-Q	6	6p12.3
CHRNB1		1140	CHRNB1	cholinergic receptor, nicotinic, beta 1 (muscle)	ACHRB|CHRNB|CMS1D|CMS2A|CMS2C|SCCMS	17	17p13.1
CKAP2		26586	CKAP2	cytoskeleton associated protein 2	LB1|TMAP|se20-10	13	13q14
CLGN		1047	CLGN	calmegin	-	4	4q28.3-q31.1
COQ10A		93058	COQ10A	coenzyme Q10A	-	12	12q13.3
CPB2		1361	CPB2	carboxypeptidase B2 (plasma)	CPU|PCPB|TAFI	13	13q14.11
CPOX		1371	CPOX	coproporphyrinogen oxidase	CPO|CPX|HCP	3	3q12
CRYAA		1409	CRYAA	crystallin, alpha A	CRYA1|CTRCT9|HSPB4	21	21q22.3
CSRNP3		80034	CSRNP3	cysteine-serine-rich nuclear protein 3	FAM130A2|PPP1R73|TAIP-2|TAIP2	2	2q24.3
CSTA		1475	CSTA	cystatin A (stefin A)	AREI|STF1|STFA	3	3q21
CYHR1		50626	CYHR1	cysteine/histidine-rich 1	CHRP	8	8q24.3
DBI		1622	DBI	diazepam binding inhibitor (GABA receptor modulator, acyl-CoA binding protein)	ACBD1|ACBP|CCK-RP|EP	2	2q12-q21
DBP		1628	DBP	D site of albumin promoter (albumin D-box) binding protein	DABP	19	19q13.3
DMRTA1		63951	DMRTA1	DMRT-like family A1	DMO|DMRT4	9	9p21.3
DNMT3L		29947	DNMT3L	DNA (cytosine-5-)-methyltransferase 3-like	-	21	21q22.3
ELFN1		392617	ELFN1	extracellular leucine-rich repeat and fibronectin type III domain containing 1	PPP1R28	7	7p22.3
ENHO		375704	ENHO	energy homeostasis associated	C9orf165|UNQ470	9	9p13.3
EPHA1		2041	EPHA1	EPH receptor A1	EPH|EPHT|EPHT1	7	7q34
ESPNL		339768	ESPNL	espin-like	-	2	2q37.3
FADS1		3992	FADS1	fatty acid desaturase 1	D5D|FADS6|FADSD5|LLCDL1|TU12	11	11q12.2-q13.1
FAM124B		79843	FAM124B	family with sequence similarity 124B	-	2	2q36.2
FAM13A		10144	FAM13A	family with sequence similarity 13, member A	ARHGAP48|FAM13A1	4	4q22.1
FAM47E		100129583	FAM47E	family with sequence similarity 47, member E	-	4	4q21.1
FBXO2		26232	FBXO2	F-box protein 2	FBG1|FBX2|Fbs1|NFB42|OCP1	1	1p36.22
FEZ1		9638	FEZ1	fasciculation and elongation protein zeta 1 (zygin I)	-	11	11q24.2
FMO1		2326	FMO1	flavin containing monooxygenase 1	-	1	1q24.3
FRAT1		10023	FRAT1	frequently rearranged in advanced T-cell lymphomas 1	-	10	10q24.1
GCK		2645	GCK	glucokinase (hexokinase 4)	FGQTL3|GK|GLK|HHF3|HK4|HKIV|HXKP|LGLK|MODY2	7	7p15.3-p15.1
GIMAP2		26157	GIMAP2	GTPase, IMAP family member 2	HIMAP2|IAN12|IMAP2	7	7q36.1
GINS2		51659	GINS2	GINS complex subunit 2 (Psf2 homolog)	HSPC037|PSF2|Pfs2	16	16q24.1
GNAO1		2775	GNAO1	guanine nucleotide binding protein (G protein), alpha activating activity polypeptide O	EIEE17|G-ALPHA-o|GNAO	16	16q13
GPAM		57678	GPAM	glycerol-3-phosphate acyltransferase, mitochondrial	GPAT|GPAT1	10	10q25.2
GRAP		10750	GRAP	GRB2-related adaptor protein	-	17	17p11.2
GRIA3		2892	GRIA3	glutamate receptor, ionotropic, AMPA 3	GLUR-C|GLUR-K3|GLUR3|GLURC|GluA3|MRX94	X	Xq25
HEXIM2		124790	HEXIM2	hexamethylene bis-acetamide inducible 2	L3	17	17q21.31
HIST1H1A		3024	HIST1H1A	histone cluster 1, H1a	H1.1|H1A|H1F1|HIST1	6	6p21.3
HIST1H1E		3008	HIST1H1E	histone cluster 1, H1e	H1.4|H1E|H1F4|H1s-4|dJ221C16.5	6	6p21.3
HIST1H2BF		8343	HIST1H2BF	histone cluster 1, H2bf	H2B/g|H2BFG	6	6p22.2
HIST1H3C		8352	HIST1H3C	histone cluster 1, H3c	H3.1|H3/c|H3FC	6	6p22.2
HIST1H4B		8366	HIST1H4B	histone cluster 1, H4b	H4/I|H4FI	6	6p22.2
HIST1H4E		8367	HIST1H4E	histone cluster 1, H4e	H4/j|H4FJ	6	6p22.2
HIST2H2AB		317772	HIST2H2AB	histone cluster 2, H2ab	H2AB	1	1q21
HIST2H2AC		8338	HIST2H2AC	histone cluster 2, H2ac	H2A|H2A-GL101|H2A/q|H2AFQ	1	1q21.2
HOPX		84525	HOPX	HOP homeobox	CAMEO|HOD|HOP|LAGY|NECC1|OB1|SMAP31|TOTO	4	4q12
IDO2		169355	IDO2	indoleamine 2,3-dioxygenase 2	INDOL1	8	8p11.21
IFIT2		3433	IFIT2	interferon-induced protein with tetratricopeptide repeats 2	G10P2|GARG-39|IFI-54|IFI-54K|IFI54|IFIT-2|ISG-54 K|ISG-54K|ISG54|P54|cig42	10	10q23.31
ISM1		140862	ISM1	isthmin 1, angiogenesis inhibitor	C20orf82|ISM|Isthmin|bA149I18.1|dJ1077I2.1	20	20p12.1
JAKMIP2		9832	JAKMIP2	janus kinase and microtubule interacting protein 2	JAMIP2|NECC1	5	5q32
KANK4		163782	KANK4	KN motif and ankyrin repeat domains 4	ANKRD38|dJ1078M7.1	1	1p31.3
KBTBD3		143879	KBTBD3	kelch repeat and BTB (POZ) domain containing 3	BKLHD3	11	11q22.3
KCNK5		8645	KCNK5	potassium channel, two pore domain subfamily K, member 5	K2p5.1|KCNK5b|TASK-2|TASK2	6	6p21
KIF22		3835	KIF22	kinesin family member 22	A-328A3.2|KID|KNSL4|OBP|OBP-1|OBP-2|SEMDJL2	16	16p11.2
KRT222		125113	KRT222	keratin 222, type II	KA21|KRT222P	17	17q21.2
LAMA4		3910	LAMA4	laminin, alpha 4	CMD1JJ|LAMA3|LAMA4*-1	6	6q21
LGALS4		3960	LGALS4	lectin, galactoside-binding, soluble, 4	GAL4|L36LBP	19	19q13.2
LGI1		9211	LGI1	leucine-rich, glioma inactivated 1	ADLTE|ADPAEF|ADPEAF|EPITEMPIN|EPT|ETL1|IB1099	10	10q24
LIN7B		64130	LIN7B	lin-7 homolog B (C. elegans)	LIN-7B|MALS-2|MALS2|VELI2	19	19q13.3
LRIG3		121227	LRIG3	leucine-rich repeats and immunoglobulin-like domains 3	LIG3	12	12q14.1
LRRC19		64922	LRRC19	leucine rich repeat containing 19	-	9	9p21.2
LRRC31		79782	LRRC31	leucine rich repeat containing 31	HEL-S-293	3	3q26.2
LRRN3		54674	LRRN3	leucine rich repeat neuronal 3	FIGLER5|NLRR-3|NLRR3	7	7q31.1
MB		4151	MB	myoglobin	PVALB|myoglobgin	22	22q13.1
METRN		79006	METRN	meteorin, glial cell differentiation regulator	C16orf23|c380A1.2	16	16p13.3
MOGAT1		116255	MOGAT1	monoacylglycerol O-acyltransferase 1	DGAT2L|DGAT2L1|MGAT1	2	2q36.1
MOGAT2		80168	MOGAT2	monoacylglycerol O-acyltransferase 2	DGAT2L5|MGAT2	11	11q13.5
MREG		55686	MREG	melanoregulin	DSU|WDT2	2	2q35
MYL6B		140465	MYL6B	myosin, light chain 6B, alkali, smooth muscle and non-muscle	MLC1SA	12	12q13.13
NAGS		162417	NAGS	N-acetylglutamate synthase	AGAS|ARGA	17	17q21.31
NAT8B		51471	NAT8B	N-acetyltransferase 8B (GCN5-related, putative, gene/pseudogene)	CML2|Hcml2|NAT8BP	2	2p13.1
NINL		22981	NINL	ninein-like	NLP|dJ691N24.1	20	20p11.22-p11.1
NLGN4Y		22829	NLGN4Y	neuroligin 4, Y-linked	-	Y	Yq11.221
NOL4		8715	NOL4	nucleolar protein 4	CT125|HRIHFB2255|NOLP	18	18q12
OGG1		4968	OGG1	8-oxoguanine DNA glycosylase	HMMH|HOGG1|MUTM|OGH1	3	3p26.2
ONECUT1		3175	ONECUT1	one cut homeobox 1	HNF-6|HNF6|HNF6A	15	15q21.3
ORAI3		93129	ORAI3	ORAI calcium release-activated calcium modulator 3	TMEM142C	16	16p11.2
OSCP1		127700	OSCP1	organic solute carrier partner 1	C1orf102|NOR1	1	1p34.3
OSGIN1		29948	OSGIN1	oxidative stress induced growth inhibitor 1	BDGI|OKL38	16	16q23.3
P2RY2		5029	P2RY2	purinergic receptor P2Y, G-protein coupled, 2	HP2U|P2RU1|P2U|P2U1|P2UR|P2Y2|P2Y2R	11	11q13.5-q14.1
PAQR7		164091	PAQR7	progestin and adipoQ receptor family member VII	MPRA|PGLP|mSR	1	1p36.11
PCDH18		54510	PCDH18	protocadherin 18	PCDH68L	4	4q31
PKD2		5311	PKD2	polycystic kidney disease 2 (autosomal dominant)	APKD2|PC2|PKD4|Pc-2|TRPP2	4	4q22.1
PRKCZ		5590	PRKCZ	protein kinase C, zeta	PKC-ZETA|PKC2	1	1p36.33-p36.2
PRSS3		5646	PRSS3	protease, serine, 3	MTG|PRSS4|T9|TRY3|TRY4	9	9p11.2
RAPGEFL1		51195	RAPGEFL1	Rap guanine nucleotide exchange factor (GEF)-like 1	Link-GEFII	17	17q21.1
RBP5		83758	RBP5	retinol binding protein 5, cellular	CRBP-III|CRBP3|CRBPIII	12	12p13.31
RMND1		55005	RMND1	required for meiotic nuclear division 1 homolog (S. cerevisiae)	C6orf96|COXPD11|RMD1|bA351K16|bA351K16.3	6	6q25.1
RNF43		54894	RNF43	ring finger protein 43	RNF124|URCC	17	17q22
RORC		6097	RORC	RAR-related orphan receptor C	NR1F3|RORG|RZR-GAMMA|RZRG|TOR	1	1q21
RPS4Y1		6192	RPS4Y1	ribosomal protein S4, Y-linked 1	RPS4Y|S4	Y	Yp11.3
RTP4		64108	RTP4	receptor (chemosensory) transporter protein 4	IFRG28|Z3CXXC4	3	3q27.3
SAMD3		154075	SAMD3	sterile alpha motif domain containing 3	-	6	6q23.1
SEC14L3		266629	SEC14L3	SEC14-like 3 (S. cerevisiae)	TAP2	22	22q12.2
SHD		56961	SHD	Src homology 2 domain containing transforming protein D	-	19	19p13.3
SIRT4		23409	SIRT4	sirtuin 4	SIR2L4	12	12q
SLC12A1		6557	SLC12A1	solute carrier family 12 (sodium/potassium/chloride transporter), member 1	BSC1|NKCC2	15	15q15-q21.1
SLC22A7		10864	SLC22A7	solute carrier family 22 (organic anion transporter), member 7	NLT|OAT2	6	6p21.1
SLC25A34		284723	SLC25A34	solute carrier family 25, member 34	-	1	1p36.21
SLC29A1		2030	SLC29A1	solute carrier family 29 (equilibrative nucleoside transporter), member 1	ENT1	6	6p21.1
SLC5A12		159963	SLC5A12	solute carrier family 5 (sodium/monocarboxylate cotransporter), member 12	SMCT2	11	11p14.2
SPHK2		56848	SPHK2	sphingosine kinase 2	SK 2|SK-2|SPK 2|SPK-2	19	19q13.2
STAG3		10734	STAG3	stromal antigen 3	-	7	7q22.1
TBC1D2		55357	TBC1D2	TBC1 domain family, member 2	PARIS-1|PARIS1|TBC1D2A	9	9q22.33
TBX10		347853	TBX10	T-box 10	TBX13|TBX7	11	11q13.2
TBX3		6926	TBX3	T-box 3	TBX3-ISO|UMS|XHL	12	12q24.21
TCAP		8557	TCAP	titin-cap	CMD1N|CMH25|LGMD2G|T-cap|TELE|telethonin	17	17q12
TDGF1		6997	TDGF1	teratocarcinoma-derived growth factor 1	CR|CRGF|CRIPTO	3	3p21.31
TEF		7008	TEF	thyrotrophic embryonic factor	-	22	22q13.2
TMEM169		92691	TMEM169	transmembrane protein 169	-	2	2q35
TMEM98		26022	TMEM98	transmembrane protein 98	TADA1	17	17q11.2
TP53I3		9540	TP53I3	tumor protein p53 inducible protein 3	PIG3	2	2p23.3
TPPP2		122664	TPPP2	tubulin polymerization-promoting protein family member 2	C14orf8|CT152|P18|p25beta	14	14q11.2
TRHDE		29953	TRHDE	thyrotropin-releasing hormone degrading enzyme	PAP-II|PGPEP2|TRH-DE	12	12q15-q21
TRIM55		84675	TRIM55	tripartite motif containing 55	MURF-2|RNF29|muRF2	8	8q13.1
WNT5A		7474	WNT5A	wingless-type MMTV integration site family, member 5A	hWNT5A	3	3p21-p14
ZFP1		162239	ZFP1	ZFP1 zinc finger protein	ZNF475	16	16q23.1
ZGPAT		84619	ZGPAT	zinc finger, CCCH-type with G patch domain	GPATC6|GPATCH6|KIAA1847|ZC3H9|ZC3HDC9|ZIP	20	20q13.3
ZNHIT3		9326	ZNHIT3	zinc finger, HIT-type containing 3	TRIP3	17	17q12
ACOT1		641371	ACOT1	acyl-CoA thioesterase 1	ACH2|CTE-1|LACH2	14	14q24.3
ACTG2		72	ACTG2	actin, gamma 2, smooth muscle, enteric	ACT|ACTA3|ACTE|ACTL3|ACTSG|VSCM	2	2p13.1
ADAM19		8728	ADAM19	ADAM metallopeptidase domain 19	FKSG34|MADDAM|MLTNB	5	5q33.3
ADAMTS1		9510	ADAMTS1	ADAM metallopeptidase with thrombospondin type 1 motif, 1	C3-C5|METH1	21	21q21.2
ADAMTS4		9507	ADAMTS4	ADAM metallopeptidase with thrombospondin type 1 motif, 4	ADAMTS-2|ADAMTS-4|ADMP-1	1	1q21-q23
AGPAT9		84803	AGPAT9	1-acylglycerol-3-phosphate O-acyltransferase 9	AGPAT 10|AGPAT8|GPAT3|HMFN0839|LPAAT-theta|MAG1	4	4q21.23
AKAP14		158798	AKAP14	A kinase (PRKA) anchor protein 14	AKAP28|PRKA14	X	Xq24
ALDH1A3		220	ALDH1A3	aldehyde dehydrogenase 1 family, member A3	ALDH1A6|ALDH6|MCOP8|RALDH3	15	15q26.3
ANXA2		302	ANXA2	annexin A2	ANX2|ANX2L4|CAL1H|HEL-S-270|LIP2|LPC2|LPC2D|P36|PAP-IV	15	15q22.2
APOBEC3A		200315	APOBEC3A	apolipoprotein B mRNA editing enzyme, catalytic polypeptide-like 3A	A3A|ARP3|PHRBN|bK150C2.1	22	22q13.1-q13.2
APOLD1		81575	APOLD1	apolipoprotein L domain containing 1	VERGE	12	12p13.1
ARG2		384	ARG2	arginase 2	-	14	14q24.1
ARID5B		84159	ARID5B	AT rich interactive domain 5B (MRF1-like)	DESRT|MRF-2|MRF2	10	10q21.2
ARL14		80117	ARL14	ADP-ribosylation factor-like 14	ARF7	3	3q25.33
ATF3		467	ATF3	activating transcription factor 3	-	1	1q32.3
ATP1B3		483	ATP1B3	ATPase, Na+/K+ transporting, beta 3 polypeptide	ATPB-3|CD298	3	3q23
ATP2B4		493	ATP2B4	ATPase, Ca++ transporting, plasma membrane 4	ATP2B2|MXRA1|PMCA4|PMCA4b|PMCA4x	1	1q32.1
BACH2		60468	BACH2	BTB and CNC homology 1, basic leucine zipper transcription factor 2	BTBD25	6	6q15
BEND3		57673	BEND3	BEN domain containing 3	KIAA1553	6	6q21
BTG2		7832	BTG2	BTG family, member 2	PC3|TIS21	1	1q32
C17orf96		100170841	C17orf96	chromosome 17 open reading frame 96	PRR28	17	17q12
C2CD4A		145741	C2CD4A	C2 calcium-dependent domain containing 4A	FAM148A|NLF1	15	15q22.2
C2CD4B		388125	C2CD4B	C2 calcium-dependent domain containing 4B	FAM148B|NLF2	15	15q22.2
C2orf66		401027	C2orf66	chromosome 2 open reading frame 66	IIDS6411|UNQ6411	2	2q33.1
CACNG2		10369	CACNG2	calcium channel, voltage-dependent, gamma subunit 2	MRD10	22	22q13.1
CALCA		796	CALCA	calcitonin-related polypeptide alpha	CALC1|CGRP|CGRP-I|CGRP1|CT|KC	11	11p15.2
CASP4		837	CASP4	caspase 4, apoptosis-related cysteine peptidase	ICE(rel)II|ICEREL-II|ICH-2|Mih1/TX|TX	11	11q22.2-q22.3
CCL2		6347	CCL2	chemokine (C-C motif) ligand 2	GDCF-2|HC11|HSMCR30|MCAF|MCP-1|MCP1|SCYA2|SMC-CF	17	17q11.2-q12
CCL20		6364	CCL20	chemokine (C-C motif) ligand 20	CKb4|Exodus|LARC|MIP-3-alpha|MIP-3a|MIP3A|SCYA20|ST38	2	2q36.3
CCL3		6348	CCL3	chemokine (C-C motif) ligand 3	G0S19-1|LD78ALPHA|MIP-1-alpha|MIP1A|SCYA3	17	17q12
CD274		29126	CD274	CD274 molecule	B7-H|B7H1|PD-L1|PDCD1L1|PDCD1LG1|PDL1	9	9p24
CDH19		28513	CDH19	cadherin 19, type 2	CDH7|CDH7L2	18	18q22.1
CDKN1A		1026	CDKN1A	cyclin-dependent kinase inhibitor 1A (p21, Cip1)	CAP20|CDKN1|CIP1|MDA-6|P21|SDI1|WAF1|p21CIP1	6	6p21.2
CEBPD		1052	CEBPD	CCAAT/enhancer binding protein (C/EBP), delta	C/EBP-delta|CELF|CRP3|NF-IL6-beta	8	8p11.2-p11.1
CH25H		9023	CH25H	cholesterol 25-hydroxylase	C25H	10	10q23
CHI3L1		1116	CHI3L1	chitinase 3-like 1 (cartilage glycoprotein-39)	ASRT7|CGP-39|GP-39|GP39|HC-gp39|HCGP-3P|YKL-40|YKL40|YYL-40|hCGP-39	1	1q32.1
CHSY3		337876	CHSY3	chondroitin sulfate synthase 3	CHSY2|CSS3	5	5q23.3
CISH		1154	CISH	cytokine inducible SH2-containing protein	BACTS2|CIS|CIS-1|G18|SOCS	3	3p21.3
CIT		11113	CIT	citron rho-interacting serine/threonine kinase	CRIK|STK21	12	12q24
CLCF1		23529	CLCF1	cardiotrophin-like cytokine factor 1	BSF-3|BSF3|CISS2|CLC|NNT-1|NNT1|NR6	11	11q13.3
CNN1		1264	CNN1	calponin 1, basic, smooth muscle	HEL-S-14|SMCC|Sm-Calp	19	19p13.2-p13.1
CRISPLD2		83716	CRISPLD2	cysteine-rich secretory protein LCCL domain containing 2	CRISP11|LCRISP2	16	16q24.1
CSF3		1440	CSF3	colony stimulating factor 3 (granulocyte)	C17orf33|CSF3OS|GCSF	17	17q11.2-q12
CT47A7		653282	CT47A7	cancer/testis antigen family 47, member A7	CT47.7	X	Xq24
CXCL6		6372	CXCL6	chemokine (C-X-C motif) ligand 6	CKA-3|GCP-2|GCP2|SCYB6	4	4q13.3
CXCR4		7852	CXCR4	chemokine (C-X-C motif) receptor 4	CD184|D2S201E|FB22|HM89|HSY3RR|LAP-3|LAP3|LCR1|LESTR|NPY3R|NPYR|NPYRL|NPYY3R|WHIM|WHIMS	2	2q21
CYP27B1		1594	CYP27B1	cytochrome P450, family 27, subfamily B, polypeptide 1	CP2B|CYP1|CYP1alpha|CYP27B|P450c1|PDDR|VDD1|VDDR|VDDRI|VDR	12	12q14.1
CYP2F1		1572	CYP2F1	cytochrome P450, family 2, subfamily F, polypeptide 1	C2F1|CYP2F	19	19q13.2
CYR61		3491	CYR61	cysteine-rich, angiogenic inducer, 61	CCN1|GIG1|IGFBP10	1	1p22.3
DEFB118		117285	DEFB118	defensin, beta 118	C20orf63|DEFB-18|ESC42|ESP13.6	20	20q11.21
DPPA3		359787	DPPA3	developmental pluripotency associated 3	STELLA	12	12p13.31
DPYSL3		1809	DPYSL3	dihydropyrimidinase-like 3	CRMP-4|CRMP4|DRP-3|DRP3|LCRMP|ULIP|ULIP-1	5	5q32
DUX3		26582	DUX3	double homeobox 3	-	-	-
DUX5		26581	DUX5	double homeobox 5	DUX1	-	-
EGR1		1958	EGR1	early growth response 1	AT225|G0S30|KROX-24|NGFI-A|TIS8|ZIF-268|ZNF225	5	5q31.1
EGR3		1960	EGR3	early growth response 3	EGR-3|PILOT	8	8p23-p21
ELF3		1999	ELF3	E74-like factor 3 (ets domain transcription factor, epithelial-specific )	EPR-1|ERT|ESE-1|ESX	1	1q32.2
EPHA2		1969	EPHA2	EPH receptor A2	ARCC2|CTPA|CTPP1|CTRCT6|ECK	1	1p36
ERN1		2081	ERN1	endoplasmic reticulum to nucleus signaling 1	IRE1|IRE1P|IRE1a|hIRE1p	17	17q24.2
ETNK1		55500	ETNK1	ethanolamine kinase 1	EKI|EKI 1|EKI1|Nbla10396	12	12p12.1
ETS2		2114	ETS2	v-ets avian erythroblastosis virus E26 oncogene homolog 2	ETS2IT1	21	21q22.2
ETV7		51513	ETV7	ets variant 7	TEL-2|TEL2|TELB	6	6p21
F3		2152	F3	coagulation factor III (thromboplastin, tissue factor)	CD142|TF|TFA	1	1p22-p21
FAM169B		283777	FAM169B	family with sequence similarity 169, member B	-	15	15q26.3
FCAR		2204	FCAR	Fc fragment of IgA receptor	CD89|CTB-61M7.2|FcalphaRI	19	19q13.42
FCGR1A		2209	FCGR1A	Fc fragment of IgG, high affinity Ia, receptor (CD64)	CD64|CD64A|FCRI|IGFR1	1	1q21.2-q21.3
FGF14		2259	FGF14	fibroblast growth factor 14	FGF-14|FHF-4|FHF4|SCA27	13	13q34
FILIP1L		11259	FILIP1L	filamin A interacting protein 1-like	DOC-1|DOC1|GIP130|GIP90	3	3q12.1
FJX1		24147	FJX1	four jointed box 1	-	11	11p13
FOXC1		2296	FOXC1	forkhead box C1	ARA|FKHL7|FREAC-3|FREAC3|IGDA|IHG1|IRID1|RIEG3	6	6p25
FOXO1		2308	FOXO1	forkhead box O1	FKH1|FKHR|FOXO1A	13	13q14.1
FRMD6		122786	FRMD6	FERM domain containing 6	C14orf31|EX1|Willin|c14_5320	14	14q22.1
FSTL3		10272	FSTL3	follistatin-like 3 (secreted glycoprotein)	FLRG|FSRP	19	19p13
FZD7		8324	FZD7	frizzled class receptor 7	FzE3	2	2q33
GAD2		2572	GAD2	glutamate decarboxylase 2 (pancreatic islets and brain, 65kDa)	GAD65	10	10p11.23
GADD45B		4616	GADD45B	growth arrest and DNA-damage-inducible, beta	GADD45BETA|MYD118	19	19p13.3
GADD45G		10912	GADD45G	growth arrest and DNA-damage-inducible, gamma	CR6|DDIT2|GADD45gamma|GRP17	9	9q22.1-q22.2
GAGE12B		729428	GAGE12B	G antigen 12B	GAGE-12B	X	Xp11.23
GAGE12C		729422	GAGE12C	G antigen 12C	GAGE-12B	X	Xp11.23
GAGE12F		100008586	GAGE12F	G antigen 12F	-	X	Xp11.23
GAGE2B		645037	GAGE2B	G antigen 2B	CT4.2|GAGE-2|GAGE-2B	X	Xp11.23
GAGE2C		2574	GAGE2C	G antigen 2C	CT4.2|GAGE-2|GAGE-2C|GAGE2	X	Xp11.23
GAGE4		2576	GAGE4	G antigen 4	CT4.4	X	Xp11.4-p11.2
GAGE5		2577	GAGE5	G antigen 5	CT4.5	X	Xp11.4-p11.2
GAGE7		2579	GAGE7	G antigen 7	AL4|CT4.7|GAGE-7	X	Xp11.4-p11.2
GEM		2669	GEM	GTP binding protein overexpressed in skeletal muscle	KIR	8	8q13-q21
GFPT2		9945	GFPT2	glutamine-fructose-6-phosphate transaminase 2	GFAT2	5	5q34-q35
GFRA3		2676	GFRA3	GDNF family receptor alpha 3	GDNFR3	5	5q31.1-q31.3
GNL3		26354	GNL3	guanine nucleotide binding protein-like 3 (nucleolar)	C77032|E2IG3|NNP47|NS	3	3p21.1
GPM6B		2824	GPM6B	glycoprotein M6B	M6B	X	Xp22.2
GPRC5A		9052	GPRC5A	G protein-coupled receptor, class C, group 5, member A	GPCR5A|PEIG-1|RAI3|RAIG1|TIG1	12	12p13.1
GRAMD4		23151	GRAMD4	GRAM domain containing 4	DIP|dA59H18.1|dJ439F8.1	22	22q13.31
GRHL1		29841	GRHL1	grainyhead-like 1 (Drosophila)	LBP32|MGR|NH32|TFCP2L2	2	2p25.1
HAS2		3037	HAS2	hyaluronan synthase 2	-	8	8q24.12
HBEGF		1839	HBEGF	heparin-binding EGF-like growth factor	DTR|DTS|DTSF|HEGFL	5	5q23
HDC		3067	HDC	histidine decarboxylase	-	15	15q21.2
HOMER1		9456	HOMER1	homer scaffolding protein 1	HOMER|HOMER1A|HOMER1B|HOMER1C|SYN47|Ves-1	5	5q14.2
HSPB6		126393	HSPB6	heat shock protein, alpha-crystallin-related, B6	HEL55|Hsp20|PPP1R91	19	19q13.12
IER3		8870	IER3	immediate early response 3	DIF-2|DIF2|GLY96|IEX-1|IEX-1L|IEX1|PRG1	6	6p21.3
IER5L		389792	IER5L	immediate early response 5-like	bA247A12.2	9	9q34.11
IL15RA		3601	IL15RA	interleukin 15 receptor, alpha	CD215	10	10p15.1
IL1B		3553	IL1B	interleukin 1, beta	IL-1|IL1-BETA|IL1F2	2	2q14
IL1RL1		9173	IL1RL1	interleukin 1 receptor-like 1	DER4|FIT-1|IL33R|ST2|ST2L|ST2V|T1	2	2q12
IL24		11009	IL24	interleukin 24	C49A|FISP|IL10B|MDA7|MOB5|ST16	1	1q32
IL2RA		3559	IL2RA	interleukin 2 receptor, alpha	CD25|IDDM10|IL2R|TCGFR|p55	10	10p15-p14
IL4R		3566	IL4R	interleukin 4 receptor	CD124|IL-4RA|IL4RA	16	16p12.1-p11.2
IL6		3569	IL6	interleukin 6	BSF2|HGF|HSF|IFNB2|IL-6	7	7p21
IRAK3		11213	IRAK3	interleukin-1 receptor-associated kinase 3	ASRT5|IRAKM	12	12q14.3
IRS2		8660	IRS2	insulin receptor substrate 2	IRS-2	13	13q34
ITLN2		142683	ITLN2	intelectin 2	HL-2|HL2	1	1q22-q23
IVNS1ABP		10625	IVNS1ABP	influenza virus NS1A binding protein	FLARA3|HSPC068|KLHL39|ND1|NS-1|NS1-BP|NS1BP	1	1q25.1-q31.1
JUN		3725	JUN	jun proto-oncogene	AP-1|AP1|c-Jun	1	1p32-p31
JUNB		3726	JUNB	jun B proto-oncogene	AP-1	19	19p13.2
KCNE4		23704	KCNE4	potassium channel, voltage gated subfamily E regulatory beta subunit 4	MIRP3	2	2q36.1
KCNK1		3775	KCNK1	potassium channel, two pore domain subfamily K, member 1	DPK|HOHO|K2P1|K2p1.1|KCNO1|TWIK-1|TWIK1	1	1q42-q43
KIAA0040		9674	KIAA0040	KIAA0040	-	1	1q25.1
KIR2DL3		3804	KIR2DL3	killer cell immunoglobulin-like receptor, two domains, long cytoplasmic tail, 3	CD158B2|CD158b|GL183|KIR-023GB|KIR-K7b|KIR-K7c|KIR2DS5|KIRCL23|NKAT|NKAT2|NKAT2A|NKAT2B|p58	19	19q13.4
KLF11		8462	KLF11	Kruppel-like factor 11	FKLF|FKLF1|MODY7|TIEG2|Tieg3	2	2p25
KLF4		9314	KLF4	Kruppel-like factor 4 (gut)	EZF|GKLF	9	9q31
KLF5		688	KLF5	Kruppel-like factor 5 (intestinal)	BTEB2|CKLF|IKLF	13	13q22.1
KLF6		1316	KLF6	Kruppel-like factor 6	BCD1|CBA1|COPEB|CPBP|GBF|PAC1|ST12|ZF9	10	10p15
KRT80		144501	KRT80	keratin 80, type II	KB20	12	12q13.13
LAMC2		3918	LAMC2	laminin, gamma 2	B2T|BM600|CSF|EBR2|EBR2A|LAMB2T|LAMNB2	1	1q25-q31
LCN2		3934	LCN2	lipocalin 2	24p3|MSFI|NGAL	9	9q34
LDLR		3949	LDLR	low density lipoprotein receptor	FH|FHC|LDLCQ2	19	19p13.2
LEPR		3953	LEPR	leptin receptor	CD295|LEP-R|LEPRD|OB-R|OBR	1	1p31
LIF		3976	LIF	leukemia inhibitory factor	CDF|DIA|HILDA|MLPLI	22	22q12.2
LIMK2		3985	LIMK2	LIM domain kinase 2	-	22	22q12.2
LIN28B		389421	LIN28B	lin-28 homolog B (C. elegans)	CSDD2	6	6q21
LIPN		643418	LIPN	lipase, family member N	ARCI8|LI4|LIPL4|bA186O14.3	10	10q23.31
LONRF2		164832	LONRF2	LON peptidase N-terminal domain and ring finger 2	RNF192	2	2q11.2
LYST		1130	LYST	lysosomal trafficking regulator	CHS|CHS1	1	1q42.1-q42.2
MAFF		23764	MAFF	v-maf avian musculoaponeurotic fibrosarcoma oncogene homolog F	U-MAF|hMafF	22	22q13.1
MAGEA10		4109	MAGEA10	melanoma antigen family A10	CT1.10|MAGE10	X	Xq28
MAP1B		4131	MAP1B	microtubule-associated protein 1B	FUTSCH|MAP5|PPP1R102	5	5q13
MAP3K8		1326	MAP3K8	mitogen-activated protein kinase kinase kinase 8	AURA2|COT|EST|ESTF|MEKK8|TPL2|Tpl-2|c-COT	10	10p11.23
MAPK4		5596	MAPK4	mitogen-activated protein kinase 4	ERK-4|ERK4|PRKM4|p63-MAPK|p63MAPK	18	18q21.1
MBNL2		10150	MBNL2	muscleblind-like splicing regulator 2	MBLL|MBLL39|PRO2032	13	13q32.1
MCAM		4162	MCAM	melanoma cell adhesion molecule	CD146|MUC18	11	11q23.3
MMP10		4319	MMP10	matrix metallopeptidase 10	SL-2|STMY2	11	11q22.3
MSX1		4487	MSX1	msh homeobox 1	ECTD3|HOX7|HYD1|STHAG1	4	4p16.2
MT1A		4489	MT1A	metallothionein 1A	MT1|MT1S|MTC	16	16q13
MTHFD2		10797	MTHFD2	methylenetetrahydrofolate dehydrogenase (NADP+ dependent) 2, methenyltetrahydrofolate cyclohydrolase	NMDMC	2	2p13.1
MUC17		140453	MUC17	mucin 17, cell surface associated	MUC3	7	7q22.1
MYBPH		4608	MYBPH	myosin binding protein H	-	1	1q32.1
MYH11		4629	MYH11	myosin, heavy chain 11, smooth muscle	AAT4|FAA4|SMHC|SMMHC	16	16p13.11
MYOM1		8736	MYOM1	myomesin 1	SKELEMIN	18	18p11.31
NAMPT		10135	NAMPT	nicotinamide phosphoribosyltransferase	1110035O14Rik|PBEF|PBEF1|VF|VISFATIN	7	7q22.3
NCOA7		135112	NCOA7	nuclear receptor coactivator 7	ERAP140|ESNA1|NCOA7-AS|Nbla00052|Nbla10993|TLDC4|dJ187J11.3	6	6q22.32
NFE2		4778	NFE2	nuclear factor, erythroid 2	NF-E2|p45	12	12q13
NFKB2		4791	NFKB2	nuclear factor of kappa light polypeptide gene enhancer in B-cells 2 (p49/p100)	CVID10|H2TF1|LYT-10|LYT10|NF-kB2|p100|p52	10	10q24
NFKBIZ		64332	NFKBIZ	nuclear factor of kappa light polypeptide gene enhancer in B-cells inhibitor, zeta	IKBZ|INAP|MAIL	3	3p12-q12
NPTX2		4885	NPTX2	neuronal pentraxin II	NARP|NP-II|NP2	7	7q21.3-q22.1
NR4A1		3164	NR4A1	nuclear receptor subfamily 4, group A, member 1	GFRP1|HMR|N10|NAK-1|NGFIB|NP10|NUR77|TR3	12	12q13
NR4A2		4929	NR4A2	nuclear receptor subfamily 4, group A, member 2	HZF-3|NOT|NURR1|RNR1|TINUR	2	2q22-q23
NR4A3		8013	NR4A3	nuclear receptor subfamily 4, group A, member 3	CHN|CSMF|MINOR|NOR1|TEC	9	9q22
NRG1		3084	NRG1	neuregulin 1	ARIA|GGF|GGF2|HGL|HRG|HRG1|HRGA|MST131|MSTP131|NDF|NRG1-IT2|SMDF	8	8p12
ODF3L1		161753	ODF3L1	outer dense fiber of sperm tails 3-like 1	-	15	15q24.2
OLR1		4973	OLR1	oxidized low density lipoprotein (lectin-like) receptor 1	CLEC8A|LOX1|LOXIN|SCARE1|SLOX1	12	12p13.2-p12.3
OR11H12		440153	OR11H12	olfactory receptor, family 11, subfamily H, member 12	-	14	14q11.2
OR1M1		125963	OR1M1	olfactory receptor, family 1, subfamily M, member 1	OR19-5|OR19-6	19	19p13.2
OR2J3		442186	OR2J3	olfactory receptor, family 2, subfamily J, member 3	6M1-3|C3HEXS|HS6M1-3|OR6-16|OR6-6|OR6.3.6|ORL671	6	6p22.1
OR2L8		391190	OR2L8	olfactory receptor, family 2, subfamily L, member 8 (gene/pseudogene)	-	1	1q44
OR4F21		441308	OR4F21	olfactory receptor, family 4, subfamily F, member 21	OR4F21P	8	8p23.3
OR4F29		729759	OR4F29	olfactory receptor, family 4, subfamily F, member 29	OR7-21	1	1p36.33
OR4F3		26683	OR4F3	olfactory receptor, family 4, subfamily F, member 3	-	5	5q35.3
OR4F5		79501	OR4F5	olfactory receptor, family 4, subfamily F, member 5	-	1	1p36.33
OSMR		9180	OSMR	oncostatin M receptor	OSMRB|PLCA1	5	5p13.1
OXCT2		64064	OXCT2	3-oxoacid CoA transferase 2	FKSG25|SCOTT	1	1p34
PAPPA		5069	PAPPA	pregnancy-associated plasma protein A, pappalysin 1	ASBABP2|DIPLA1|IGFBP-4ase|PAPA|PAPP-A|PAPPA1	9	9q33.2
PDLIM3		27295	PDLIM3	PDZ and LIM domain 3	ALP	4	4q35
PFKFB3		5209	PFKFB3	6-phosphofructo-2-kinase/fructose-2,6-biphosphatase 3	IPFK2|PFK2	10	10p15.1
PHC2		1912	PHC2	polyhomeotic homolog 2 (Drosophila)	EDR2|HPH2|PH2	1	1p34.3
PHLDA1		22822	PHLDA1	pleckstrin homology-like domain, family A, member 1	DT1P1B11|PHRIP|TDAG51	12	12q15
PHYHIPL		84457	PHYHIPL	phytanoyl-CoA 2-hydroxylase interacting protein-like	-	10	10q11
PLSCR1		5359	PLSCR1	phospholipid scramblase 1	MMTRA1B	3	3q23
PMP22		5376	PMP22	peripheral myelin protein 22	CMT1A|CMT1E|DSS|GAS-3|HMSNIA|HNPP|Sp110	17	17p12
PNLIP		5406	PNLIP	pancreatic lipase	PL|PNLIPD|PTL	10	10q26.1
PPAN		56342	PPAN	peter pan homolog (Drosophila)	BXDC3|SSF|SSF-1|SSF1|SSF2	19	19p13
PPAP2B		8613	PPAP2B	phosphatidic acid phosphatase type 2B	Dri42|LPP3|PAP2B|VCIP	1	1p32.2
PRAMEF6		440561	PRAMEF6	PRAME family member 6	-	1	1p36.21
PRR20B		729233	PRR20B	proline rich 20B	-	13	13q21.1
PRR20C		729240	PRR20C	proline rich 20C	-	13	13q21.1
PRRX1		5396	PRRX1	paired related homeobox 1	AGOTC|PHOX1|PMX1|PRX-1|PRX1	1	1q24
PTGS2		5743	PTGS2	prostaglandin-endoperoxide synthase 2 (prostaglandin G/H synthase and cyclooxygenase)	COX-2|COX2|GRIPGHS|PGG/HS|PGHS-2|PHS-2|hCox-2	1	1q25.2-q25.3
PTX3		5806	PTX3	pentraxin 3, long	TNFAIP5|TSG-14	3	3q25
PVR		5817	PVR	poliovirus receptor	CD155|HVED|NECL5|Necl-5|PVS|TAGE4	19	19q13.2
RAB27A		5873	RAB27A	RAB27A, member RAS oncogene family	GS2|HsT18676|RAB27|RAM	15	15q15-q21.1
RASD1		51655	RASD1	RAS, dexamethasone-induced 1	AGS1|DEXRAS1|MGC:26290	17	17p11.2
RASL10A		10633	RASL10A	RAS-like, family 10, member A	RRP22	22	22q12.2
RBPMS		11030	RBPMS	RNA binding protein with multiple splicing	HERMES	8	8p12
RGS1		5996	RGS1	regulator of G-protein signaling 1	1R20|BL34|HEL-S-87|IER1|IR20	1	1q31
RGS16		6004	RGS16	regulator of G-protein signaling 16	A28-RGS14|A28-RGS14P|RGS-R	1	1q25-q31
RGS2		5997	RGS2	regulator of G-protein signaling 2	G0S8	1	1q31
RPGR		6103	RPGR	retinitis pigmentosa GTPase regulator	COD1|CORDX1|CRD|PCDX|RP15|RP3|XLRP3|orf15	X	Xp21.1
RRP12		23223	RRP12	ribosomal RNA processing 12 homolog (S. cerevisiae)	KIAA0690	10	10q24.1
RRS1		23212	RRS1	RRS1 ribosome biogenesis regulator homolog (S. cerevisiae)	-	8	8q13.1
RUNX1		861	RUNX1	runt-related transcription factor 1	AML1|AML1-EVI-1|AMLCR1|CBFA2|EVI-1|PEBP2aB	21	21q22.3
SAA1		6288	SAA1	serum amyloid A1	PIG4|SAA|SAA2|TP53I4	11	11p15.1
SBK2		646643	SBK2	SH3 domain binding kinase family, member 2	SGK069	19	19q13.42
SEMA4B		10509	SEMA4B	sema domain, immunoglobulin domain (Ig), transmembrane domain (TM) and short cytoplasmic domain, (semaphorin) 4B	SEMAC|SemC	15	15q25
SERPINA1		5265	SERPINA1	serpin peptidase inhibitor, clade A (alpha-1 antiproteinase, antitrypsin), member 1	A1A|A1AT|AAT|PI|PI1|PRO2275|alpha1AT	14	14q32.1
SERPINB2		5055	SERPINB2	serpin peptidase inhibitor, clade B (ovalbumin), member 2	HsT1201|PAI|PAI-2|PAI2|PLANH2	18	18q21.3
SERPINB8		5271	SERPINB8	serpin peptidase inhibitor, clade B (ovalbumin), member 8	CAP2|PI8	18	18q22.1
SERPINE1		5054	SERPINE1	serpin peptidase inhibitor, clade E (nexin, plasminogen activator inhibitor type 1), member 1	PAI|PAI-1|PAI1|PLANH1	7	7q22.1
SIGLEC14		100049587	SIGLEC14	sialic acid binding Ig-like lectin 14	-	19	19q13.4
SIK1		150094	SIK1	salt-inducible kinase 1	EIEE30|MSK|SIK|SNF1LK	21	21q22.3
SIPA1L2		57568	SIPA1L2	signal-induced proliferation-associated 1 like 2	SPAL2	1	1q42.2
SIRPA		140885	SIRPA	signal-regulatory protein alpha	BIT|CD172A|MFR|MYD-1|P84|PTPNS1|SHPS1|SIRP	20	20p13
SLC7A1		6541	SLC7A1	solute carrier family 7 (cationic amino acid transporter, y+ system), member 1	ATRC1|CAT-1|ERR|HCAT1|REC1L	13	13q12.3
SLITRK3		22865	SLITRK3	SLIT and NTRK-like family, member 3	-	3	3q26.1
SOCS1		8651	SOCS1	suppressor of cytokine signaling 1	CIS1|CISH1|JAB|SOCS-1|SSI-1|SSI1|TIP3	16	16p13.13
SOCS2		8835	SOCS2	suppressor of cytokine signaling 2	CIS2|Cish2|SOCS-2|SSI-2|SSI2|STATI2	12	12q
SPRY4		81848	SPRY4	sprouty RTK signaling antagonist 4	HH17	5	5q31.3
SPTBN1		6711	SPTBN1	spectrin, beta, non-erythrocytic 1	ELF|HEL102|SPTB2|betaSpII	2	2p21
SRGN		5552	SRGN	serglycin	PPG|PRG|PRG1	10	10q22.1
SSX1		6756	SSX1	synovial sarcoma, X breakpoint 1	CT5.1|SSRC	X	Xp11.23
SSX2		6757	SSX2	synovial sarcoma, X breakpoint 2	CT5.2|CT5.2A|HD21|HOM-MEL-40|SSX	X	Xp11.22
SSX4B		548313	SSX4B	synovial sarcoma, X breakpoint 4B	CT5.4	X	Xp11.23
SYN1		6853	SYN1	synapsin I	SYN1a|SYN1b|SYNI	X	Xp11.23
SYNE2		23224	SYNE2	spectrin repeat containing, nuclear envelope 2	EDMD5|NUA|NUANCE|Nesp2|Nesprin-2|SYNE-2|TROPH	14	14q23.2
TACSTD2		4070	TACSTD2	tumor-associated calcium signal transducer 2	EGP-1|EGP1|GA733-1|GA7331|GP50|M1S1|TROP2	1	1p32
TAGLN		6876	TAGLN	transgelin	SM22|SMCC|TAGLN1|WS3-10	11	11q23.2
TEAD4		7004	TEAD4	TEA domain family member 4	EFTR-2|RTEF1|TCF13L1|TEF-3|TEF3|TEFR-1|hRTEF-1B	12	12p13.3-p13.2
TGFB3		7043	TGFB3	transforming growth factor, beta 3	ARVD|ARVD1|RNHF|TGF-beta3	14	14q24
TGM2		7052	TGM2	transglutaminase 2	G-ALPHA-h|GNAH|HEL-S-45|TG2|TGC	20	20q12
THBD		7056	THBD	thrombomodulin	AHUS6|BDCA3|CD141|THPH12|THRM|TM	20	20p11.2
THBS1		7057	THBS1	thrombospondin 1	THBS|THBS-1|TSP|TSP-1|TSP1	15	15q15
TMEM158		25907	TMEM158	transmembrane protein 158 (gene/pseudogene)	BBP|RIS1|p40BBP	3	3p21.3
TMEM185B		79134	TMEM185B	transmembrane protein 185B	FAM11B	2	2q14.2
TMEM233		387890	TMEM233	transmembrane protein 233	DSPB2|IFITMD2	12	12q24.23
TMPRSS2		7113	TMPRSS2	transmembrane protease, serine 2	PP9284|PRSS10	21	21q22.3
TNFAIP8L3		388121	TNFAIP8L3	tumor necrosis factor, alpha-induced protein 8-like 3	TIPE3	15	15q21.2
TNFRSF10D		8793	TNFRSF10D	tumor necrosis factor receptor superfamily, member 10d, decoy with truncated death domain	CD264|DCR2|TRAIL-R4|TRAILR4|TRUNDD	8	8p21
TNFRSF12A		51330	TNFRSF12A	tumor necrosis factor receptor superfamily, member 12A	CD266|FN14|TWEAKR	16	16p13.3
TNFSF14		8740	TNFSF14	tumor necrosis factor (ligand) superfamily, member 14	CD258|HVEML|LIGHT|LTg|TR2	19	19p13.3
TNIK		23043	TNIK	TRAF2 and NCK interacting kinase	-	3	3q26.31
TRIM15		89870	TRIM15	tripartite motif containing 15	RNF93|ZNF178|ZNFB7	6	6p21.3
TUBB6		84617	TUBB6	tubulin, beta 6 class V	HsT1601|TUBB-5	18	18p11.21
URB2		9816	URB2	URB2 ribosome biogenesis 2 homolog (S. cerevisiae)	KIAA0133|NET10|NPA2	1	1q42.13
VCAN		1462	VCAN	versican	CSPG2|ERVR|GHAP|PG-M|WGN|WGN1	5	5q14.3
WT1		7490	WT1	Wilms tumor 1	AWT1|EWS-WT1|GUD|NPHS4|WAGR|WIT-2|WT33	11	11p13
XRN2		22803	XRN2	5'-3' exoribonuclease 2	-	20	20p11.2-p11.1
ZFP36		7538	ZFP36	ZFP36 ring finger protein	G0S24|GOS24|NUP475|RNF162A|TIS11|TTP|zfp-36	19	19q13.1
ZFYVE27		118813	ZFYVE27	zinc finger, FYVE domain containing 27	PROTRUDIN|SPG33	10	10q24.2
ZNF878		729747	ZNF878	zinc finger protein 878	-	19	19p13.2

## Sheet: Cellular component
Analysis: Cellular component
Dataset name: SH
Cellular component	No. of genes in the dataset	No. of genes in the background dataset	Percentage of genes	Fold enrichment	P-value (Hypergeometric test)	Bonferroni method	BH method	Q-value (Storey-Tibshirani method)	genes mapped (from input data set)
Plasma membrane	205	3479	32.3855	1.35476	4.56573e-07	0.000357953	0.000119318	0.000641855	ACVR2B; ADRB2; AKAP12; ALOX5AP; ANXA1; AVPR1A; BASP1; BIRC3; C16orf54; C5AR1; CCR1; CD44; CD52; CD55; CD83; CD93; CDHR2; CELSR2; CHIC2; CLC; CLEC4E; CMTM2; CORO1A; CR1; CSF2RB; CSF3R; CXCR2; ERBB2; EVI2B; F2RL1; FCAMR; FCER1G; FCGR2A; FCN1; FLT1; FPR1; FPR2; GCA; GPR27; HAVCR2; HCAR3; HCK; HLA-DPA1; ICAM1; IL17RA; IL18RAP; IL1R2; ITGAM; ITGB2; ITPRIP; LILRB2; LSP1; LST1; LYN; MGAM; SLC16A3; MMP25…
ER-Golgi intermediate compartment	4	30	0.631912	3.072	0.039626	1	0.995237	1	ERGIC1; LMAN1; SEC22B; TMED2;
Integral to membrane	53	1702	8.37283	0.716041	0.997694	1	1	1	ADGRG3; CDHR2; CELSR2; CLEC7A; CLPTM1; EMP1; EMP3; ERBB2; FAM65B; FPR1; FPR2; GPR160; LST1; PLAUR; RIPK4; SLC6A6; SORT1; LMAN1; SEC61A1; TRAM1; NCAM2; GRID1; AMOT; C2orf82; CYHR1; FADS1; GIMAP2; LRRC19; LRRN3; NAT8B; PKD2; SLC5A12; TMEM98; AGPAT9; CDH19; CHSY3; F3; FZD7; GAD2; GPM6B; HAS2; IL15RA; KIR2DL3; MUC17; OR11H12; OR2J3; OR2L8; OR4F21; OR4F3; OR4F5; PVR; SIGLEC14; ZFYVE27;
Integral to plasma membrane	68	934	10.7425	1.67403	1.80433e-05	0.0141459	0.00353649	0.0190241	ACVR2B; ADRB2; AVPR1A; C5AR1; CCR1; CD44; CD52; CD55; CD83; CLPTM1; CR1; CSF2RB; CSF3R; CXCR2; EVI2B; F2RL1; FADS2; FCER1G; FLT1; HCAR3; HLA-DPA1; ICAM1; IL17RA; KCNJ15; LAPTM5; LILRB2; SLC16A3; SDC4; SELL; SGCE; SGMS2; SLC11A1; SLC16A6; TIE1; TLR1; TLR2; TNFRSF10C; ZYX; ABCB11; HLA-DQA1; FLRT2; PTPRS; SLC33A1; MEP1B; CHRNB1; EPHA1; KCNK5; P2RY2; SLC22A7; SLC29A1; TRHDE; ATP2B4; CXCR4; EPHA2; FCA…
Golgi aparatus	34	897	5.37125	0.871669	0.823732	1	1	1	CCL4; CD93; CHIC2; DNMBP; ERGIC1; F2RL1; FASN; FPR1; LITAF; LST1; LYN; SDC4; SEC14L1; SGMS2; SORT1; UGCG; CANX; CPD; LMAN1; MANEA; MCFD2; SEC61A1; SLC33A1; TMED2; GDF15; ABCG8; SEC14L3; ADAM19; ADAMTS1; CH25H; CRISPLD2; GRHL1; RPGR; SRGN;
Nucleus	269	5847	42.4961	1.05773	0.120117	1	1	1	AKAP12; ALDOA; ALOX5; ALOX5AP; ANXA1; BASP1; BAZ1A; BBOX1; BCL6; BHLHE40; BIRC3; CASP7; CD44; CECR2; CLC; CORO1A; EFHD2; ELMSAN1; ERBB2; FAM101B; FAM107A; FASN; FCER1G; FOSL1; FOSL2; FRAT2; GATA4; GATAD2A; HCK; HIVEP1; HMGA1; HSPA6; IRF1; ITPRIP; JUND; KRT8; LITAF; LMNB1; SOD2; MAP2K3; CREB5; LYN; MAP1LC3A; MAP3K14; MID1IP1; MIDN; ZC3H12A; BCL3; MLXIP; MNDA; MOB3A; MPND; MX2; MXD1; MYO1F; NABP1; …
Perinuclear region of cytoplasm	7	119	1.10585	1.35418	0.260615	1	1	1	HSPA6; S100A4; S100A6; SORT1; TPPP; CLIC4; HSP90B1;
Actin cytoskeleton	10	132	1.57978	1.74329	0.0620781	1	1	1	ALDOA; CDC42EP3; LSP1; PPP1R18; VASP; WASL; CLIC4; TWF1; PKD2; NFE2;
Ribonucleoprotein complex	2	65	0.315956	0.710818	0.780953	1	1	1	HSPA6; BRCA1;
Nucleolus	47	1257	7.42496	0.859793	0.883176	1	1	1	BCL6; ELMSAN1; FOSL2; GATAD2A; HMGA1; KRT8; LMNB1; S100A4; S100A9; SP1; STAT3; WASL; ZBTB43; CBX5; MEIS2; ZNF652; MYC; FOS; ACSS2; ASPM; CSRNP3; HIST1H1E; HIST1H2BF; HIST1H4B; HIST1H4E; NOL4; TBX3; ANXA2; ATF3; CLCF1; GNL3; GRHL1; JUNB; KLF4; NFE2; PDLIM3; PHLDA1; PPAN; RASL10A; RPGR; RRP12; RRS1; SPTBN1; SYNE2; TNIK; URB2; XRN2;
Mitochondrion	42	1259	6.63507	0.767124	0.975745	1	1	1	ALDOA; ANXA1; BCL2A1; C10orf10; CORO1A; DHODH; FASN; HSPA6; ITGB2; LMNB1; SOD2; MGAM; RAB5C; SLC25A37; STAT3; CANX; CLIC4; CYP3A5; GLT8D1; HSP90B1; SEC22B; SEC63; P4HA1; BRCA1; CPOX; DBI; GCK; GPAM; NAGS; OGG1; SIRT4; ARG2; CASP4; CYP27B1; FRMD6; GRAMD4; LIMK2; MT1A; MTHFD2; NR4A1; OXCT2; PHYHIPL;
Cytosolic small ribosomal subunit	1	36	0.157978	0.644823	0.79869	1	1	1	RPS4Y1;
Cytosol	57	1178	9.00474	1.11261	0.21435	1	1	1	ALDOA; ALOX5; BIRC3; CASP7; FASN; HMGA1; HMOX1; HSD17B14; LYN; MAP1LC3A; MAP3K14; NCF1; NCF4; PDE4B; PLEK; PPP3R1; PRKCI; PTPN1; RAB11FIP1; RAB5C; RAC2; RALGDS; RND1; S100A12; S100A6; SERPINB9; VASP; CLIC4; GSTT1; HSP90B1; EIF4A2; NAT2; ACSS2; ANXA9; DNMT3L; GCK; GPAM; LGALS4; NINL; PRKCZ; RPS4Y1; SPHK2; ACOT1; CDKN1A; CH25H; FOXO1; IRS2; MAP3K8; NAMPT; PFKFB3; RAB27A; RPGR; SERPINB8; SIK1; SPTBN…
Ribosome	2	144	0.315956	0.320882	0.987794	1	1	1	RPS4Y1; RRS1;
Membrane fraction	24	346	3.79147	1.59531	0.0166208	1	0.975103	1	CD52; DGAT2; EMP1; FADS2; HMOX1; LILRB2; LRRK2; SLC16A3; PLEK; SLC16A6; UGCG; ABCB11; CPD; NT5E; SLC33A1; FADS1; PRKCZ; RAPGEFL1; SLC12A1; SLC22A7; SLC29A1; SPHK2; WNT5A; OLR1;
Cytoplasm	273	5684	43.128	1.10425	0.0180288	1	0.975103	1	ACVR2B; ADSSL1; AKAP12; ALDOA; ALOX5; ALOX5AP; ANXA1; ARHGAP30; BASP1; BBOX1; BCL2A1; BIRC3; CASP7; CD44; CDC42BPA; CDC42EP3; CLC; CNDP1; CORO1A; COTL1; CXCR2; DEFA3; DEFA1; DNMBP; DOK3; DTX4; EFHD2; ENO3; ERBB2; ERGIC1; FAM129A; FAM65B; FASN; FCER1G; FGR; FLT1; FOSL2; FRAT2; GATAD2A; GCA; HCK; HMGA1; HSPA6; ICAM1; IL1RN; IRF1; ITPKC; KRT8; LMNB1; MAP2K3; LPGAT1; LRRK2; LSP1; LST1; LYN; MAP1LC3A;…
Exosomes	121	2043	19.1153	1.36174	0.000184555	0.144691	0.0289382	0.155669	ALDOA; ANXA1; BASP1; BBOX1; CD44; CD55; CDC42BPA; CDHR2; CELSR2; CETP; CORO1A; COTL1; CR1; DEFA1B; DEFA3; DEFA1; ENO3; ERBB2; EVI2B; FAM129A; FASN; FCN1; FGR; GCA; GLIPR2; HSPA6; ICAM1; IL1RN; ITGB2; KRT8; CREB5; LRRK2; LSP1; LYZ; METRNL; MGAM; MMP25; MNDA; MYADM; PECAM1; PILRA; PKLR; PRKCI; QPCT; RAB5C; RAC2; S100A11; S100A4; S100A6; S100A8; S100A9; S100P; SDC4; SERPINB9; SLC2A3; SORT1; TAGLN2; …
Perinuclear region	4	131	0.631912	0.703691	0.827151	1	1	1	BRCA1; C9orf24; PKD2; KLF6;
Midbody	1	19	0.157978	1.22147	0.570646	1	1	1	CLIC4;
Chromatin	3	32	0.473934	2.16184	0.161023	1	1	1	JUND; MAF; JUNB;
Oncostatin-M receptor complex	1	3	0.157978	7.71431	0.124903	1	1	1	OSMR;
Lysosome	71	1620	11.2164	1.00773	0.492027	1	1	1	ADRB2; AKAP12; ALOX5; ANXA1; BASP1; CD55; CDHR2; CLPTM1; CSF3R; CST7; EFHD2; ERBB2; F2RL1; FLT1; HCK; ITGAM; ITGB2; LAPTM5; LYN; LYZ; MGAM; SLC16A3; MYADM; PECAM1; PLBD1; PPP3R1; RAB5C; RAC2; S100A11; S100A8; S100A9; SERPINB9; SLC11A1; SORT1; TAGLN2; TPSAB1; TPSB2; CANX; CLIC4; CPD; HSP90B1; LMAN1; NT5E; SEC22B; SLC39A8; TMED2; TRAM1; TSPAN8; CSTA; MREG; SPHK2; ANXA2; ATP1B3; ATP2B4; CD274; F3; L…
Endoplasmic reticulum	53	1104	8.37283	1.10389	0.242546	1	1	1	ALOX5AP; CASP7; CCL4; CETP; DGAT2; ERGIC1; FADS2; HMOX1; HSPA6; LPGAT1; PPP1R15A; PTPN1; SORT1; SRD5A2; TLR1; UGCG; CANX; CPD; CYP2C9; HSP90B1; LMAN1; MCFD2; RTP3; SEC22B; SEC61A1; SEC63; SLC33A1; TMEM50B; TRAM1; CYP7A1; P4HA1; GDF15; FOS; ABCG8; CLGN; FADS1; FMO1; GPAM; MOGAT2; SEC14L3; TMEM98; ADAM19; AGPAT9; CASP4; CH25H; CRISPLD2; CYP2F1; ERN1; HOMER1; IER3; LIMK2; PTGS2; SERPINA1;
Secretory granule	4	50	0.631912	1.84344	0.171772	1	1	1	CLC; RAB26; GCK; LCN2;
Nucleosome	5	44	0.789889	2.61715	0.0411497	1	0.995237	1	HIST1H1E; HIST1H2BF; HIST1H4B; HIST1H4E; HIST2H2AC;
Endosome	14	303	2.21169	1.06298	0.447247	1	1	1	ADRB2; AVPR1A; CXCR2; FPR1; MAMDC4; RAB11FIP1; RAB20; RAB5C; S100A11; SLC11A1; SORT1; SLC39A8; ANXA2; LDLR;
Cell surface	20	205	3.15956	2.24396	0.000630437	0.494262	0.082377	0.443137	ACVR2B; CD44; CXCR2; F2RL1; MMP19; MMP25; PLAUR; SORT1; STAT3; TLR2; CLIC4; AMOT; ANXA9; GRIA3; TDGF1; CXCR4; HBEGF; LEPR; PVR; THBD;
Mitochondrial intermembrane space	1	12	0.157978	1.9334	0.413658	1	1	1	DHODH;
Extracellular	125	1825	19.7472	1.57479	9.76998e-08	7.65966e-05	3.82983e-05	0.000206021	BASP1; BCL6; CCL4; CD55; CETP; CFP; CLC; CORO1A; CSF3R; CST7; CXCL1; CXCL3; DEFA3; DEFA1; DNMBP; ENO3; ERBB2; FCAMR; FCN1; FLT1; ICAM1; IL1R2; IL1RN; JUND; KRT8; LYZ; MMP19; MMP9; PECAM1; PLAUR; PRAP1; PRKCI; PROK2; QPCT; S100A8; S100A9; SELL; STAT3; STC1; TGFB1; TNFAIP6; TPSAB1; TPSB2; TSLP; VNN3; WASL; WNT11; COL1A2; EFEMP1; LMAN1; MCFD2; MEP1B; P4HA1; IGFBP2; GDF15; IGFBP1; AFP; CCL14; CKAP2; …
Kinetochore	1	90	0.157978	0.257972	0.981955	1	1	1	KIF22;
Extracellular region	24	442	3.79147	1.24883	0.155472	1	1	1	ANXA1; CCL4; CETP; CFP; ERBB2; PLEK; PROK2; TGFB1; TPSAB1; TPSB2; COL1A2; CCL2; CCL3; CLCF1; IL1B; LAMC2; NRG1; PAPPA; PTX3; SAA1; SERPINA1; SERPINE1; TGFB3; THBS1;
Integrin complex	2	22	0.315956	2.09951	0.247952	1	1	1	ITGAM; ITGB2;
Internal side of plasma membrane	1	8	0.157978	2.89889	0.299423	1	1	1	GEM;
Membrane	26	350	4.10742	1.70845	0.00561833	1	0.400434	1	CD44; CXCR2; ERGIC1; HMOX1; SLC16A3; MMP25; MYADM; NCF4; SEC14L1; SIGIRR; TLR1; TM6SF2; CANX; LMAN1; NT5E; SEC22B; SEC61A1; TMED2; ATP1B3; ATP2B4; MCAM; NRG1; PPAP2B; PVR; SIRPA; TACSTD2;
PML body	1	37	0.157978	0.6274	0.807468	1	1	1	CBX5;
Extracellular space	45	404	7.109	2.56129	6.47494e-09	5.07636e-06	5.07636e-06	2.73076e-05	CCL4; CETP; CFP; CXCL1; CXCL3; FLT1; HMOX1; ICAM1; IL1RN; LYZ; MMP9; PECAM1; SERPINB9; TGFB1; TPSAB1; COL1A2; EFEMP1; MEP1B; IGFBP1; CCL14; CPB2; LGI1; PRSS3; WNT5A; ADAMTS4; CALCA; CCL2; CCL20; CHI3L1; CSF3; DUX5; F3; FJX1; FSTL3; HBEGF; IL1B; IL6; MMP10; NRG1; PVR; SERPINA1; SERPINE1; SRGN; THBS1; VCAN;
Extracellular matrix	13	120	2.05371	2.49231	0.00215212	1	0.187474	1	CFP; DEFA1B; MMP25; STAT3; TPSAB1; VASP; COL1A2; EFEMP1; F3; SERPINE1; TGFB3; THBS1; VCAN;
Receptor complex	2	11	0.315956	4.19712	0.080108	1	1	1	ADRB2; ERBB2;
Endoplasmic reticulum membrane	11	150	1.73776	1.68737	0.0628674	1	1	1	CASP7; CANX; CYP2C9; CYP3A5; HSP90B1; LMAN1; SLC33A1; CYP7A1; PKD2; AGPAT9; CYP2F1;
Ubiquitin ligase complex	1	43	0.157978	0.539876	0.852667	1	1	1	BRCA1;
Nucleoplasm	16	449	2.52765	0.819743	0.827636	1	1	1	CASP7; RPS6KA5; ZNF217; MYC; ANXA9; BRCA1; GCK; HIST1H4B; HIST1H4E; OGG1; CDKN1A; FOXO1; IVNS1ABP; JUN; NR4A1; WT1;
Dendrite	1	27	0.157978	0.859684	0.699348	1	1	1	RAB27A;
Nuclear speck	2	31	0.315956	1.49017	0.39303	1	1	1	HSPA6; WT1;
Centrosome	17	656	2.68562	0.596123	0.994024	1	1	1	ALDOA; CORO1A; ERGIC1; FASN; LITAF; LMNB1; MPND; S100A4; CLIC4; BRCA1; HIST1H3C; HIST1H4B; HIST1H4E; NINL; ANXA2; GFPT2; SPTBN1;
Soluble fraction	9	180	1.4218	1.15072	0.382891	1	1	1	CD55; NCF1; PDE4B; PLEK; CLIC4; GSTT1; ANXA2; CCL3; IL1RL1;
Nuclear envelope	6	71	0.947867	1.9458	0.0880086	1	1	1	ALOX5; ALOX5AP; LMNB1; S100A6; CBX5; SYNE2;
Integral to Golgi membrane	1	19	0.157978	1.22147	0.570646	1	1	1	SGMS2;
Focal adhesion	4	45	0.631912	2.04822	0.130798	1	1	1	VASP; ZYX; LPP; SYNE2;
Cytoskeleton	19	427	3.00158	1.0235	0.493141	1	1	1	BASP1; CCDC71L; CORO1A; FCER1G; KRT8; PECAM1; TGFB1; TPPP; VASP; SEC22B; SEPSECS; CKAP2; ANXA2; CNN1; LYST; OSMR; SPTBN1; THBS1; TNIK;
Apical plasma membrane	2	42	0.315956	1.09998	0.550849	1	1	1	ABCG8; NRG1;
Intracellular	7	151	1.10585	1.06722	0.486557	1	1	1	CXCR2; IL1RN; MOB3A; CLIC4; ZNHIT3; NCOA7; TGM2;
Cell-cell junction	1	38	0.157978	0.610894	0.815864	1	1	1	CLIC4;
Nuclear envelope lumen	1	1	0.157978	22.9902	0.0434962	1	0.995237	1	ALOX5;
Platelet alpha granule lumen	4	35	0.631912	2.63326	0.064003	1	1	1	TGFB1; SERPINA1; TGFB3; THBS1;
Voltage-gated calcium channel complex	1	20	0.157978	1.16042	0.589346	1	1	1	CACNG2;
Microtubule	7	129	1.10585	1.24921	0.329759	1	1	1	MAP1LC3A; RASSF5; TPPP; ASPM; CKAP2; KIF22; TRIM55;
Ruffle	3	24	0.473934	2.88215	0.0842392	1	1	1	S100A11; S100A6; AMOT;
Cilium	1	10	0.157978	2.31969	0.359077	1	1	1	RPGR;
Insoluble fraction	2	13	0.315956	3.5519	0.107362	1	1	1	PDE4B; S100A12;
Caveola	1	24	0.157978	0.9671	0.656358	1	1	1	HCK;
Cytoplasmic membrane-bounded vesicle	2	19	0.315956	2.43084	0.199201	1	1	1	SORT1; CXCR4;
Endosome membrane	2	27	0.315956	1.71086	0.329516	1	1	1	TLR8; LDLR;
Stress fiber	2	16	0.315956	2.88634	0.151872	1	1	1	ZYX; AMOT;
Nuclear lumen	1	2	0.157978	11.5523	0.0851033	1	1	1	SYNE2;
Nuclear matrix	3	37	0.473934	1.86978	0.216589	1	1	1	ALOX5; CLIC4; OGG1;
Proteinaceous extracellular matrix	7	70	1.10585	2.30197	0.0320413	1	0.995237	1	MMP19; MMP25; EFEMP1; FLRT2; CHI3L1; MMP10; VCAN;
Protein complex	3	65	0.473934	1.06446	0.541797	1	1	1	CORO1A; BCL3; BRCA1;
Apical part of cell	1	13	0.157978	1.78479	0.439183	1	1	1	CLIC4;
Microvillus	1	11	0.157978	2.109	0.386974	1	1	1	CLIC4;
Transcription factor complex	3	43	0.473934	1.60894	0.287374	1	1	1	HMGA1; SOX17; IVNS1ABP;
Nuclear membrane	5	78	0.789889	1.47649	0.251564	1	1	1	ALOX5; ALOX5AP; TAGLN2; CANX; SYNE2;
Myosin complex	2	10	0.315956	4.61641	0.067434	1	1	1	MYL6B; FILIP1L;
Late endosome	3	40	0.473934	1.72958	0.251613	1	1	1	F2RL1; PRKCZ; RAB27A;
Histone deacetylase complex	1	21	0.157978	1.10519	0.607232	1	1	1	ZNF217;
Ruffle membrane	1	11	0.157978	2.109	0.386974	1	1	1	PLEK;
Nicotinic acetylcholine-gated receptor-channel complex	1	11	0.157978	2.109	0.386974	1	1	1	CHRNB1;
Synaptic vesicle	1	24	0.157978	0.9671	0.656358	1	1	1	RGS1;
Microsome	13	156	2.05371	1.9172	0.0186563	1	0.975103	1	HMOX1; LPGAT1; PRKCI; SORT1; CYP2C9; CYP3A5; HSP90B1; TMED2; FADS1; MOGAT2; PRKCZ; CYP2F1; GPRC5A;
Lamellipodium	2	23	0.315956	2.00827	0.264323	1	1	1	CORO1A; AMOT;
Microtubule cytoskeleton	4	47	0.631912	1.96108	0.14667	1	1	1	TPPP; CLIC4; CKAP2; LYST;
Intracellular membrane-bounded organelle	5	127	0.789889	0.906864	0.652491	1	1	1	LITAF; LYN; TMED2; ACSS2; RUNX1;
Cell junction	3	38	0.473934	1.82058	0.228156	1	1	1	CDC42BPA; PPP1R18; PRKCZ;
Mitochondrial matrix	2	79	0.315956	0.584866	0.863853	1	1	1	SOD2; SIRT4;
Membrane raft	2	36	0.315956	1.28326	0.468301	1	1	1	CD55; LYN;
Centriole	1	22	0.157978	1.05498	0.624341	1	1	1	RPGR;
Autophagic vacuole	1	6	0.157978	3.86357	0.234227	1	1	1	MAP1LC3A;
Peroxisome	4	111	0.631912	0.830471	0.717145	1	1	1	BBOX1; LAPTM5; PAQR7; PHLDA1;
Endoplasmic reticulum lumen	3	24	0.473934	2.88215	0.0842392	1	1	1	HSP90B1; FMO1; PTGS2;
Golgi membrane	1	55	0.157978	0.422106	0.913752	1	1	1	LMAN1;
BRCA1-A complex	1	7	0.157978	3.31242	0.267549	1	1	1	BRCA1;
Endocytic vesicle	1	16	0.157978	1.45035	0.509291	1	1	1	AMOT;
Voltage-gated potassium channel complex	1	42	0.157978	0.552727	0.845947	1	1	1	KCNK1;
Polysome	1	7	0.157978	3.31242	0.267549	1	1	1	RPS4Y1;
Coated pit	2	13	0.315956	3.5519	0.107362	1	1	1	SORT1; LDLR;
External side of plasma membrane	3	35	0.473934	1.97659	0.193859	1	1	1	AMOT; LDLR; THBS1;
Eukaryotic translation initiation factor 4F complex	1	9	0.157978	2.57714	0.329913	1	1	1	EIF4A2;
Sarcoglycan complex	1	4	0.157978	5.79054	0.162975	1	1	1	SGCE;
Calcineurin complex	1	2	0.157978	11.5523	0.0851033	1	1	1	PPP3R1;
Spliceosomal complex	1	46	0.157978	0.504675	0.871121	1	1	1	IVNS1ABP;
Clathrin-coated vesicle	1	19	0.157978	1.22147	0.570646	1	1	1	SORT1;
Cell-cell adherens junction	1	13	0.157978	1.78479	0.439183	1	1	1	ZYX;
High-density lipoprotein particle	1	11	0.157978	2.109	0.386974	1	1	1	CETP;
Basolateral plasma membrane	1	40	0.157978	0.580357	0.831575	1	1	1	ERBB2;
Integral to endoplasmic reticulum membrane	1	31	0.157978	0.748793	0.748432	1	1	1	ERN1;
Z disc	2	8	0.315956	5.76907	0.0444302	1	0.995237	1	TCAP; SYNE2;
BRCA1-BARD1 complex	1	2	0.157978	11.5523	0.0851033	1	1	1	BRCA1;
Early endosome	4	69	0.631912	1.3359	0.352991	1	1	1	CSF3R; SORT1; LDLR; LEPR;
Mitochondrial inner membrane	1	58	0.157978	0.400277	0.924564	1	1	1	DHODH;
Photoreceptor outer segment	1	5	0.157978	4.63475	0.199392	1	1	1	RPGR;
Unconventional myosin complex	2	7	0.315956	6.59205	0.0342957	1	0.995237	1	MYO1F; MYL6B;
SUN-KASH complex	1	5	0.157978	4.63475	0.199392	1	1	1	SYNE2;
Gamma-tubulin ring complex	1	6	0.157978	3.86357	0.234227	1	1	1	BRCA1;
Cytoplasmic vesicle	7	160	1.10585	1.00719	0.548202	1	1	1	CST7; F2RL1; RND1; VNN2; ADAMTS1; CXCR4; GPRC5A;
Phagocytic vesicle membrane	1	3	0.157978	7.71431	0.124903	1	1	1	SLC11A1;
Transport vesicle	1	21	0.157978	1.10519	0.607232	1	1	1	CRISPLD2;
Sin3 complex	1	7	0.157978	3.31242	0.267549	1	1	1	SIN3A;
Golgi lumen	1	11	0.157978	2.109	0.386974	1	1	1	TGFB1;
Stored secretory granule	1	19	0.157978	1.22147	0.570646	1	1	1	THBS1;
Cyclin-dependent protein kinase holoenzyme complex	1	7	0.157978	3.31242	0.267549	1	1	1	CDKN1A;
Filopodium membrane	1	2	0.157978	11.5523	0.0851033	1	1	1	SYNE2;
Platelet alpha granule membrane	1	11	0.157978	2.109	0.386974	1	1	1	PECAM1;
Muscle myosin complex	2	15	0.315956	3.07863	0.136643	1	1	1	MYL6B; MYH11;
Intermediate filament	1	36	0.157978	0.644823	0.79869	1	1	1	KRT8;
NADPH oxidase complex	3	8	0.473934	8.63925	0.00389227	1	0.305154	1	NCF1; NCF2; NCF4;
Granulocyte macrophage colony-stimulating factor receptor complex	1	1	0.157978	22.9902	0.0434962	1	0.995237	1	CSF2RB;
Spectrin	1	9	0.157978	2.57714	0.329913	1	1	1	SPTBN1;
Inclusion body	1	6	0.157978	3.86357	0.234227	1	1	1	HSPA6;
Actin filament	1	24	0.157978	0.9671	0.656358	1	1	1	AMOT;
Clathrin-coated endocytic vesicle membrane	1	2	0.157978	11.5523	0.0851033	1	1	1	LDLR;
Endocytic vesicle membrane	2	22	0.315956	2.09951	0.247952	1	1	1	GRIA3; CACNG2;
Melanosome	1	7	0.157978	3.31242	0.267549	1	1	1	RAB27A;
Extrinsic to internal side of plasma membrane	1	4	0.157978	5.79054	0.162975	1	1	1	S100A6;
Extrinsic to membrane	2	13	0.315956	3.5519	0.107362	1	1	1	PLAUR; GFRA3;
Chromosome	1	59	0.157978	0.393494	0.927858	1	1	1	CBX5;
Microtubule associated complex	1	24	0.157978	0.9671	0.656358	1	1	1	MAP1B;
Condensed nuclear chromosome	1	12	0.157978	1.9334	0.413658	1	1	1	RRS1;
Others	3	51	0.473934	1.35661	0.383548	1	1	1	CST7; LCN2; SERPINA1;
Cornified envelope	2	19	0.315956	2.43084	0.199201	1	1	1	ANXA1; CSTA;
Striated myosin muscle thick filament	1	2	0.157978	11.5523	0.0851033	1	1	1	MYOM1;
Fibrinogen complex	1	7	0.157978	3.31242	0.267549	1	1	1	THBS1;
Microtubule-based flagellum	1	2	0.157978	11.5523	0.0851033	1	1	1	OXCT2;
Synapse	2	33	0.315956	1.39989	0.42377	1	1	1	CHRNB1; SEMA4B;
Platelet alpha granule	1	10	0.157978	2.31969	0.359077	1	1	1	THBS1;
Nuclear chromosome	1	17	0.157978	1.36508	0.530658	1	1	1	JUN;
Apical membrane	1	16	0.157978	1.45035	0.509291	1	1	1	ANXA2;
Basement membrane	1	21	0.157978	1.10519	0.607232	1	1	1	LAMA4;
Interleukin-6 receptor complex	1	3	0.157978	7.71431	0.124903	1	1	1	IL6;
Lamin fiLament	1	3	0.157978	7.71431	0.124903	1	1	1	LMNB1;
Tight junction	1	14	0.157978	1.65739	0.463598	1	1	1	AMOT;
Adherens junction	2	6	0.315956	7.68889	0.0252151	1	0.995237	1	RND1; PPAP2B;
Microtubule basal body	1	8	0.157978	2.89889	0.299423	1	1	1	PKD2;
Dystrophin-associated glycoprotein complex	1	10	0.157978	2.31969	0.359077	1	1	1	SGCE;
Mitochondrial part	1	2	0.157978	11.5523	0.0851033	1	1	1	SYNE2;
NuRD complex	1	12	0.157978	1.9334	0.413658	1	1	1	GATAD2A;
Cortical actin cytoskeleton	1	5	0.157978	4.63475	0.199392	1	1	1	CORO1A;
Cell leading edge	1	6	0.157978	3.86357	0.234227	1	1	1	CXCR4;
Filamentous actin	1	9	0.157978	2.57714	0.329913	1	1	1	CORO1A;
Phagocytic vesicle	1	4	0.157978	5.79054	0.162975	1	1	1	CORO1A;
Sodium:potassium-exchanging ATPase complex	1	6	0.157978	3.86357	0.234227	1	1	1	ATP1B3;
Exocytic vesicle	1	3	0.157978	7.71431	0.124903	1	1	1	RAB27A;
Anchored to plasma membrane	1	8	0.157978	2.89889	0.299423	1	1	1	CD160;
Striated muscle thick filament	1	2	0.157978	11.5523	0.0851033	1	1	1	MYOM1;
I band	1	6	0.157978	3.86357	0.234227	1	1	1	ALDOA;
Mitochondrial membrane	3	56	0.473934	1.2355	0.442319	1	1	1	CASP7; DHODH; MYC;
Sarcoplasmic reticulum	1	32	0.157978	0.725401	0.759397	1	1	1	SYNE2;
Toll-like receptor 1-Toll-like receptor 2 protein complex	2	2	0.315956	22.9902	0.00188906	1	0.185128	0.995872	TLR1; TLR2;
Nuclear heterochromatin	2	5	0.315956	9.2236	0.0173048	1	0.975103	1	CBX5; FOXC1;
External side of mitochondrial outer membrane	1	1	0.157978	22.9902	0.0434962	1	0.995237	1	LRRK2;
PCNA-p21 complex	1	2	0.157978	11.5523	0.0851033	1	1	1	CDKN1A;
Vesicle	1	4	0.157978	5.79054	0.162975	1	1	1	CETP;
SOSS complex	1	4	0.157978	5.79054	0.162975	1	1	1	NABP1;
Extracellular vesicular exosome	1	1	0.157978	22.9902	0.0434962	1	0.995237	1	ALDOA;
Zymogen granule	1	34	0.157978	0.682743	0.779918	1	1	1	PNLIP;
Cell projection	1	41	0.157978	0.566205	0.838921	1	1	1	ITPRIP;
Synaptonemal complex	1	4	0.157978	5.79054	0.162975	1	1	1	STAG3;
Collagen type I	1	2	0.157978	11.5523	0.0851033	1	1	1	COL1A2;
Replication fork	1	3	0.157978	7.71431	0.124903	1	1	1	BCL6;
Sarcoplasm	1	3	0.157978	7.71431	0.124903	1	1	1	MB;
Immunological synapse	1	7	0.157978	3.31242	0.267549	1	1	1	RASSF5;
Unknown membrane (None)	1	4	0.157978	5.79054	0.162975	1	1	1	MAP1LC3A;
Bcl3-Bcl10 complex	1	1	0.157978	22.9902	0.0434962	1	0.995237	1	BCL3;
ACF complex	1	1	0.157978	22.9902	0.0434962	1	0.995237	1	BAZ1A;
Basolateral membrane	2	9	0.315956	5.12877	0.05551	1	1	1	KCNJ15; ATP2B4;
Lipid particle	1	4	0.157978	5.79054	0.162975	1	1	1	PLIN1;
Mast cell granule	1	1	0.157978	22.9902	0.0434962	1	0.995237	1	CXCR2;
Bcl3/NF-kappaB2 complex	2	2	0.315956	22.9902	0.00188906	1	0.185128	0.995872	BCL3; NFKB2;
Phagocytic cup	1	1	0.157978	22.9902	0.0434962	1	0.995237	1	CORO1A;
Organelle membrane	1	1	0.157978	22.9902	0.0434962	1	0.995237	1	MAP1LC3A;
Lamellipodium membrane	1	2	0.157978	11.5523	0.0851033	1	1	1	SYNE2;
Axoneme	2	6	0.315956	7.68889	0.0252151	1	0.995237	1	AKAP14; RPGR;
Polarisome	1	1	0.157978	22.9902	0.0434962	1	0.995237	1	PRKCI;
Tertiary granule membrane	1	1	0.157978	22.9902	0.0434962	1	0.995237	1	SLC11A1;
Nuclear centromeric heterochromatin	1	1	0.157978	22.9902	0.0434962	1	0.995237	1	CBX5;
Others(granules of neutrophils)	1	1	0.157978	22.9902	0.0434962	1	0.995237	1	DEFA1;

## Sheet: Molecular function
Analysis: Molecular function
Dataset name: SH
Molecular function	No. of genes in the dataset	No. of genes in the background dataset	Percentage of genes	Fold enrichment	P-value (Hypergeometric test)	Bonferroni method	BH method	Q-value (Storey-Tibshirani method)	genes mapped (from input data set)
Molecular function unknown	155	5685	21.6179	0.689258	1	1	1	1	AAED1; ADSSL1; ARRDC3; ARRDC4; C10orf10; CCDC71L; CD52; CD83; CECR2; CHIC2; CLEC7A; CLPTM1; CMTM2; COTL1; DHODH; EFHD2; EMP1; EMP3; EVI2B; FAM101B; FAM102B; FAM107A; FAM129A; FAM43A; FAM65B; G0S2; GLIPR2; ITPRIP; KDM6B; KIAA0226L; LAPTM5; LRRK2; MAMDC4; METRNL; MIDN; MOB3A; MPEG1; MPND; MYADM; PLBD1; PLEKHO2; PNRC1; PPP1R15A; PPP1R18; PRAP1; R3HDM4; SIGIRR; SPSB1; TAGLN2; TIMD4; TM6SF2; TMEM154; …
Protease inhibitor activity	7	94	0.97629	1.88494	0.0788096	1	0.929124	1	CST7; SERPINB9; CSTA; SERPINA1; SERPINB2; SERPINB8; SERPINE1;
Acyltransferase activity	8	80	1.11576	2.5307	0.0136626	1	0.437202	1	DGAT2; LPGAT1; NAT2; GPAM; MOGAT1; MOGAT2; NAT8B; AGPAT9;
Deacetylase activity	1	14	0.13947	1.82237	0.431799	1	1	1	SIRT4;
Cell adhesion molecule activity	17	356	2.37099	1.2078	0.24614	1	1	1	CDHR2; ICAM1; ITGB2; PECAM1; SELL; THEMIS2; ZYX; FLRT2; NCAM2; IGFBP1; CDH15; LAMA4; LGALS4; NLGN4Y; PCDH18; CDH19; MCAM;
Ligase activity	3	112	0.41841	0.679302	0.825024	1	1	1	BIRC3; SGMS2; FANCL;
Transaminase activity	2	23	0.27894	2.20817	0.230364	1	1	1	GFPT2; TGM2;
Transporter activity	23	576	3.20781	1.00981	0.512257	1	1	1	CETP; ERGIC1; SEC14L1; SLC11A1; SLC2A14; SLC6A6; ABCB11; SEC22B; SEC63; TMED2; GRID1; ABCC6; ABCG8; AFP; MB; RBP5; RTP4; SEC14L3; SLC25A34; SLC5A12; LCN2; SAA1; SYN1;
Translation regulator activity	1	101	0.13947	0.252761	0.983229	1	1	1	EIF4A2;
ATPase activity	2	111	0.27894	0.457706	0.937414	1	1	1	ATP1B3; ATP2B4;
Protein-tyrosine kinase activity	4	38	0.55788	2.66686	0.0620211	1	0.868296	1	FGR; HCK; LYN; TWF1;
Catalytic activity	23	532	3.20781	1.09333	0.360396	1	1	1	BBOX1; ENO3; FADS2; FASN; HMOX1; NCF2; NCF4; PKLR; QPCT; SRD5A2; CYP2C9; PAH; CYP7A1; ACSS2; CPOX; FMO1; SPHK2; ALDH1A3; CH25H; CYP27B1; CYP2F1; ETNK1; MTHFD2;
Transferase activity	6	156	0.83682	0.973812	0.585873	1	1	1	UGCG; SLC33A1; CHSY3; HAS2; NAMPT; OXCT2;
GTPase activator activity	8	144	1.11576	1.40602	0.211227	1	1	1	ARHGAP30; RAB11FIP1; TAGAP; TBC1D2; RGS1; RGS16; RGS2; SIPA1L2;
Oxidoreductase activity	6	161	0.83682	0.943571	0.616673	1	1	1	HSD17B14; CYP3A5; P4HA1; FADS1; IDO2; TP53I3;
Hydrolase activity	7	203	0.97629	0.872878	0.696679	1	1	1	LYZ; MGAM; PADI4; VNN3; NT5E; ARG2; DPYSL3;
Serine-type peptidase activity	5	98	0.69735	1.29217	0.346493	1	1	1	TPSAB1; TPSB2; PREPL; PRSS3; TMPRSS2;
Acid phosphatase activity	1	12	0.13947	2.12584	0.383994	1	1	1	PPAP2B;
Receptor binding	7	129	0.97629	1.37356	0.249783	1	1	1	PROK2; TGFB1; WNT11; DBI; WNT5A; CD274; TNFSF14;
Structural molecule activity	9	269	1.25523	0.846661	0.741721	1	1	1	KRT8; LMNB1; MYL6B; TCAP; ACTG2; LAMC2; MYBPH; MYH11; MYOM1;
Structural constituent of cytoskeleton	6	137	0.83682	1.10886	0.458948	1	1	1	TPPP; CCDC150; KRT80; SPTBN1; SYNE2; TUBB6;
Cytoskeletal protein binding	11	218	1.53417	1.27663	0.246292	1	1	1	CORO1A; MAP1LC3A; MID1IP1; RND1; VASP; WASL; CKAP2; IFIT2; CNN1; MAP1B; TAGLN;
Receptor signaling protein serine/threonine kinase activity	1	14	0.13947	1.82237	0.431799	1	1	1	ACVR2B;
Metallopeptidase activity	10	101	1.3947	2.50509	0.00664377	1	0.248034	1	CNDP1; MMP19; MMP25; MMP9; MEP1B; ADAM19; ADAMTS1; ADAMTS4; MMP10; PAPPA;
G-protein coupled receptor activity	23	736	3.20781	0.790289	0.902815	1	1	1	ADGRG3; ADRB2; AVPR1A; C5AR1; CELSR2; CXCR2; F2RL1; FPR1; FPR2; GPR160; GPR27; HCAR3; P2RY2; CXCR4; FZD7; GPRC5A; OR11H12; OR1M1; OR2J3; OR2L8; OR4F21; OR4F3; OR4F5;
Cytoskeletal anchoring activity	2	39	0.27894	1.30249	0.460184	1	1	1	AKAP12; AKAP14;
Protein serine/threonine kinase activity	18	301	2.51046	1.51247	0.0541978	1	0.850691	1	CDC42BPA; MAP2K3; MAP3K14; PIM1; PIM3; PLK2; PRKCI; RIPK4; RPS6KA5; WNK3; PRKCZ; CIT; ERN1; IRAK3; LIMK2; MAPK4; SIK1; TNIK;
Lyase activity	1	21	0.13947	1.2152	0.571766	1	1	1	ALDOA;
Transcription regulator activity	36	832	5.02092	1.09408	0.311804	1	1	1	BASP1; GATAD2A; HIVEP1; IRF1; BCL3; MXD1; NRIP1; PPRC1; SIN3A; SOX7; TLE3; ZBTB21; ZBTB43; KLF3; BRCA1; DNMT3L; HEXIM2; HOPX; TBX3; ZNHIT3; ARID5B; ATF3; BTG2; C2CD4A; DUX3; DUX5; GRHL1; KLF4; MSX1; NCOA7; NFKBIZ; PRRX1; SSX1; SSX2; SSX4B; WT1;
Extracellular matrix structural constituent	10	166	1.3947	1.52424	0.123073	1	1	1	SGCE; TNFAIP6; COL1A2; EFEMP1; CHI3L1; CYR61; FSTL3; SRGN; THBS1; VCAN;
Receptor activity	38	361	5.29986	2.66153	4.1914e-08	9.38873e-06	9.38873e-06	3.96091e-05	CCR1; CD44; CLEC4E; FCAMR; FCER1G; FCGR2A; FCGR3B; HAVCR2; IL1R2; ITGAM; LILRB2; LST1; PILRA; PLAUR; PLXNC1; SDC4; SORT1; TLR1; TLR2; TLR8; TNFRSF10C; TREM1; CD160; CHRNB1; PAQR7; FCAR; FCGR1A; GFRA3; KIR2DL3; LDLR; LEPR; OLR1; PVR; SIRPA; TACSTD2; THBD; TNFRSF10D; TNFRSF12A;
Ligand-dependent nuclear receptor activity	4	35	0.55788	2.89538	0.0482041	1	0.830593	1	RORC; NR4A1; NR4A2; NR4A3;
Transcription factor activity	51	842	7.11297	1.53141	0.00167495	0.375188	0.093797	0.39571	BHLHE40; FOSL1; FOSL2; GATA4; JUND; LITAF; CREB5; ZC3H12A; MLXIP; MNDA; NFATC2; NFIL3; RELB; SOX17; SP1; STAT3; ZFP36L2; ZNF217; HMBOX1; MAF; MEIS2; MYC; FOSB; FOS; ASCL2; CEBPA; DBP; ONECUT1; TBX10; TEF; BACH2; CEBPD; EGR1; EGR3; ELF3; ETS2; ETV7; FOXC1; FOXO1; JUN; JUNB; KLF11; KLF5; KLF6; MAFF; NFE2; NFKB2; PHLDA1; RUNX1; TEAD4; ZNF878;
Defense/immunity protein activity	6	61	0.83682	2.49016	0.0330538	1	0.738428	1	DEFA1B; DEFA3; DEFA1; FCN1; DEFB118; PTX3;
Receptor signaling complex scaffold activity	16	322	2.23152	1.25683	0.20801	1	1	1	BCL2A1; DOK3; SLA; SOCS3; TRAF4; TOB1; ANKS4B; FRAT1; GRAP; LIN7B; CISH; HOMER1; IRS2; LYST; SOCS1; SOCS2;
Calcium ion binding	17	185	2.37099	2.32414	0.00110545	0.247621	0.0825403	0.348221	ANXA1; GCA; LSP1; PLEK; S100A11; S100A12; S100A4; S100A6; S100A8; S100A9; S100P; STC1; SYT17; ANXA9; NINL; ANXA2; NPTX2;
Transmembrane receptor protein tyrosine kinase activity	5	56	0.69735	2.26113	0.0698955	1	0.873836	1	ERBB2; FLT1; TIE1; EPHA1; EPHA2;
Lipase activity	2	19	0.27894	2.6728	0.172016	1	1	1	ALOX5; PNLIP;
Enzyme activator activity	1	4	0.13947	6.36693	0.149102	1	1	1	ALOX5AP;
Carboxy-lyase activity	2	20	0.27894	2.53923	0.186399	1	1	1	GAD2; HDC;
Ubiquitin-specific protease activity	5	377	0.69735	0.335922	0.999293	1	1	1	DTX4; FRAT2; RNF19B; FBXO2; PHC2;
Ribonuclease activity	1	48	0.13947	0.531793	0.85629	1	1	1	XRN2;
Growth factor activity	8	110	1.11576	1.84057	0.070219	1	0.873836	1	IGFBP2; GDF15; OSGIN1; TDGF1; FGF14; HBEGF; NRG1; TGFB3;
DNA repair protein	1	57	0.13947	0.447841	0.90017	1	1	1	OGG1;
Protein binding	5	182	0.69735	0.695818	0.851149	1	1	1	PEG10; SERTAD1; GADD45G; IVNS1ABP; PLSCR1;
RNA binding	8	366	1.11576	0.553213	0.978736	1	1	1	TIA1; HEXIM2; SAMD3; ZGPAT; APOBEC3A; MBNL2; RBPMS; ZFP36;
GTPase activity	10	222	1.3947	1.13976	0.383079	1	1	1	CDC42EP3; MX2; RAB20; RAB26; RAB5C; RAC2; GIMAP2; GNAO1; GEM; RAB27A;
DNA binding	24	654	3.34728	0.928027	0.677907	1	1	1	BAZ1A; BCL6; ELMSAN1; HMGA1; RFX2; SIN3A; YBX3; CBX5; TIGD2; ZNF385B; ZNF652; DMRTA1; HIST1H1A; HIST1H1E; HIST1H2BF; HIST1H3C; HIST1H4B; HIST1H4E; HIST2H2AB; HIST2H2AC; KIF22; ZFP1; LIN28B; LONRF2;
Chaperone activity	5	126	0.69735	1.00505	0.560859	1	1	1	AHSA2; CANX; LMAN1; CLGN; HSPB6;
Auxiliary transport protein activity	10	333	1.3947	0.759853	0.852947	1	1	1	SLC16A3; SLC16A6; SLC2A3; SLC39A8; TRAM1; PKD2; SLC12A1; SLC22A7; SLC29A1; SLC7A1;
Motor activity	1	79	0.13947	0.323141	0.95906	1	1	1	MYO1F;
MHC class I receptor activity	2	37	0.27894	1.37287	0.433254	1	1	1	HLA-DPA1; HLA-DQA1;
MHC class II receptor activity	2	38	0.27894	1.33675	0.446811	1	1	1	HLA-DPA1; HLA-DQA1;
Voltage-gated ion channel activity	3	130	0.41841	0.585252	0.892552	1	1	1	KCNK5; CACNG2; KCNE4;
Complement activity	3	28	0.41841	2.71648	0.0972638	1	0.982577	1	CD55; CD93; CFP;
Complement receptor activity	1	5	0.13947	5.09609	0.18277	1	1	1	CR1;
Cysteine-type peptidase activity	2	46	0.27894	1.10432	0.548177	1	1	1	CASP7; CASP4;
Structural constituent of ribosome	1	152	0.13947	0.167959	0.99789	1	1	1	RPS4Y1;
Hormone activity	1	25	0.13947	1.02085	0.635687	1	1	1	CALCA;
Peptidase activity	1	58	0.13947	0.44012	0.904132	1	1	1	DPEP2;
Transcription factor binding	2	10	0.27894	5.07592	0.0569659	1	0.850691	1	MEIS2; MAFF;
Heat shock protein activity	3	27	0.41841	2.81705	0.0893469	1	0.982577	1	HSPA6; HSP90B1; CRYAA;
Kinase regulator activity	2	23	0.27894	2.20817	0.230364	1	1	1	HEXIM2; CDKN1A;
Phosphatase regulator activity	1	16	0.13947	1.59472	0.475899	1	1	1	PPP3R1;
Protein tyrosine/serine/threonine phosphatase activity	1	37	0.13947	0.689851	0.775734	1	1	1	MTMR4;
Guanyl-nucleotide exchange factor activity	6	112	0.83682	1.35635	0.282938	1	1	1	DNMBP; RALGDS; RAP1GDS1; RAPGEFL1; RASD1; RPGR;
Lipid kinase activity	1	35	0.13947	0.72926	0.75684	1	1	1	ITPKC;
Intracellular ligand-gated ion channel activity	1	30	0.13947	0.850763	0.702357	1	1	1	CLIC4;
Extracellular ligand-gated ion channel activity	1	41	0.13947	0.622565	0.809237	1	1	1	GRIA3;
Phospholipase activity	2	45	0.27894	1.12886	0.536237	1	1	1	CLC; NAPEPLD;
Protein threonine/tyrosine kinase activity	1	28	0.13947	0.91151	0.677291	1	1	1	MAP3K8;
Phosphoric diester hydrolase activity	2	29	0.27894	1.75146	0.319293	1	1	1	PDE11A; PDE4B;
Cytokine activity	9	107	1.25523	2.1284	0.0259716	1	0.71555	1	IL1RN; TSLP; CCL3; CLCF1; CSF3; IL1B; IL24; IL6; LIF;
Carboxypeptidase activity	2	21	0.27894	2.41837	0.200941	1	1	1	CPD; CPB2;
Enzyme regulator activity	1	13	0.13947	1.96244	0.408378	1	1	1	NCF4;
Transmembrane receptor activity	10	52	1.3947	4.8652	3.0919e-05	0.00692586	0.00346293	0.0146094	C16orf54; CSF2RB; CSF3R; IL17RA; IL18RAP; IL15RA; IL1RL1; IL2RA; IL4R; OSMR;
Helicase activity	1	25	0.13947	1.02085	0.635687	1	1	1	SBNO2;
Aminopeptidase activity	1	29	0.13947	0.880089	0.690077	1	1	1	TRHDE;
Ribonucleoprotein	2	41	0.27894	1.23897	0.486352	1	1	1	PPAN; RRS1;
Protein tyrosine phosphatase activity	1	25	0.13947	1.02085	0.635687	1	1	1	PTPN1;
Cofactor binding	1	1	0.13947	25.2786	0.0395586	1	0.738428	1	F3;
Storage protein	1	3	0.13947	8.48219	0.114049	1	0.982577	1	PLIN1;
Phosphorylase activity	1	20	0.13947	1.27593	0.554108	1	1	1	GCK;
GTP binding	2	8	0.27894	6.34332	0.0373418	1	0.738428	1	GNL3; RASL10A;
Signal transducer activity	1	31	0.13947	0.823328	0.714151	1	1	1	TSPAN8;
Peroxidase activity	1	20	0.13947	1.27593	0.554108	1	1	1	PTGS2;
Chemokine activity	7	53	0.97629	3.34282	0.00466048	1	0.20879	0.88084	CCL4; CXCL1; CXCL3; CCL14; CCL2; CCL20; CXCL6;
Glutathione transferase activity	1	21	0.13947	1.2152	0.571766	1	1	1	GSTT1;
Nucleic acid binding	1	9	0.13947	2.83367	0.304652	1	1	1	NABP1;
Receptor regulator activity	1	6	0.13947	4.24815	0.215107	1	1	1	ITPRIP;
Inward rectifier channel	2	14	0.27894	3.62669	0.103911	1	0.982577	1	KCNJ15; KCNK1;
Regulator of G-protein signaling activity	1	4	0.13947	6.36693	0.149102	1	1	1	RASSF5;
Sugar-phosphatase activity	1	4	0.13947	6.36693	0.149102	1	1	1	PFKFB3;
Receptor signaling protein tyrosine phosphatase activity	2	16	0.27894	3.17364	0.130214	1	1	1	PTPRE; PTPRS;
Superoxide dismutase activity	1	3	0.13947	8.48219	0.114049	1	0.982577	1	SOD2;
Intracellular transporter activity	1	4	0.13947	6.36693	0.149102	1	1	1	SEC61A1;
Neurotransmitter transporter activity	1	5	0.13947	5.09609	0.18277	1	1	1	SYT12;
Caspase activator activity	2	7	0.27894	7.24822	0.0287498	1	0.71555	1	RASSF2; GRAMD4;
Carrier activity	1	3	0.13947	8.48219	0.114049	1	0.982577	1	SLC25A37;
Protein translocase activity	1	3	0.13947	8.48219	0.114049	1	0.982577	1	SEC61A1;

## Sheet: Biological process
Analysis: Biological Process
Dataset name: SH
Biological process	No. of genes in the dataset	No. of genes in the background dataset	Percentage of genes	Fold enrichment	P-value (Hypergeometric test)	Bonferroni method	BH method	Q-value (Storey-Tibshirani method)	genes mapped (from input data set)
Biological_process unknown	127	4731	17.7127	0.678599	1	1	1	1	AAED1; ARRDC4; C10orf10; CCDC71L; CD52; CHIC2; CLEC7A; CLPTM1; DHODH; EFHD2; FAM101B; FAM102B; FAM107A; FAM129A; FAM43A; GLIPR2; ITPRIP; KDM6B; KIAA0226L; LRRK2; MAMDC4; METRNL; MOB3A; MPEG1; MPND; MYADM; PLBD1; PLEKHO2; PNRC1; PPP1R18; PRAP1; R3HDM4; TAGLN2; TIMD4; TM6SF2; TMEM154; TMEM71; TNFRSF10C; AUTS2; CNTN3; GLT8D1; MANEA; MUM1; PCMTD1; RTP3; SEPSECS; TMEM50B; WDR72; WNK3; ALPK2; MT1H; ACB…
Protein metabolism	42	1323	5.85774	0.802636	0.947483	1	1	1	CNDP1; CST7; DPEP2; FRAT2; HSPA6; MIDN; MMP19; MMP9; RNF19B; SERPINB9; TPSAB1; TPSB2; AHSA2; CPD; HSP90B1; LMAN1; EIF4A2; PREPL; MEP1B; P4HA1; CLGN; CPB2; CRYAA; CSTA; FBXO2; PRSS3; RPS4Y1; TRHDE; ADAM19; ADAMTS1; ADAMTS4; F3; HSPB6; MMP10; PAPPA; PHC2; PHLDA1; SERPINA1; SERPINB2; SERPINB8; SERPINE1; TMPRSS2;
Metabolism	64	1683	8.92608	0.961369	0.651964	1	1	1	ADSSL1; ALDOA; ALOX5; BBOX1; DGAT2; ENO3; FADS2; FASN; HMOX1; HSD17B14; LPGAT1; LYZ; MGAM; NCF2; NCF4; PADI4; PDE11A; PKLR; QPCT; SRD5A2; UGCG; VNN3; CYP2C9; CYP3A5; FANCL; GLT8D1; GSTT1; PAH; NAPEPLD; NAT2; SLC33A1; CYP7A1; P4HA1; ACSS2; CPOX; DBI; FADS1; FMO1; GCK; GPAM; IDO2; MOGAT1; MOGAT2; NAGS; SPHK2; ALDH1A3; ARG2; CH25H; CHSY3; CYP27B1; CYP2F1; DPYSL3; ETNK1; GAD2; GFPT2; HAS2; HDC; MT1A;…
Energy pathways	64	1633	8.92608	0.990805	0.551831	1	1	1	ADSSL1; ALDOA; ALOX5; BBOX1; DGAT2; ENO3; FADS2; FASN; HMOX1; HSD17B14; LPGAT1; LYZ; MGAM; NCF2; NCF4; PADI4; PDE11A; QPCT; SRD5A2; UGCG; VNN3; CYP2C9; CYP3A5; FANCL; GLT8D1; GSTT1; PAH; NAPEPLD; NAT2; SLC33A1; CYP7A1; P4HA1; ACSS2; CPOX; DBI; FADS1; FMO1; GCK; GPAM; IDO2; MOGAT1; MOGAT2; NAGS; SPHK2; AGPAT9; ALDH1A3; ARG2; CH25H; CHSY3; CYP27B1; CYP2F1; DPYSL3; ETNK1; GAD2; GFPT2; HAS2; HDC; MT1…
Cell growth and/or maintenance	47	1125	6.55509	1.05624	0.369204	1	1	1	AKAP12; CORO1A; COTL1; EMP1; EMP3; EVI2B; FAM65B; KRT8; LMNB1; SOD2; MID1IP1; MYO1F; RND1; S100A4; SGCE; TNFAIP6; TPPP; WASL; COL1A2; EFEMP1; LPP; NCAM2; C9orf24; CCDC150; CDH15; CKAP2; IFIT2; LAMA4; METRN; MYL6B; TCAP; ACTG2; CHI3L1; CNN1; KRT80; LAMC2; MAP1B; MYBPH; MYH11; MYOM1; PDLIM3; RRS1; SPTBN1; SYNE2; THBS1; TUBB6; VCAN;
Transport	44	1215	6.13668	0.915589	0.753422	1	1	1	C16orf54; CETP; ERGIC1; KCNJ15; SLC16A3; SEC14L1; SLC11A1; SLC16A6; SLC25A37; SLC2A14; SLC2A3; SLC6A6; ABCB11; CLIC4; SEC61A1; SEC63; SLC39A8; TMED2; TRAM1; GRID1; ABCC6; ABCG8; AFP; GRIA3; KCNK5; MB; PKD2; RBP5; SEC14L3; SLC12A1; SLC22A7; SLC25A34; SLC29A1; SLC5A12; ATP1B3; ATP2B4; CACNG2; KCNE4; KCNK1; LCN2; OLR1; RPGR; SLC7A1; SYN1;
Cell communication	186	3713	25.9414	1.26631	0.000190777	0.0339584	0.0113195	0.0575535	ACVR2B; ADGRG3; ADRB2; ANXA1; ARHGAP30; ARRDC3; AVPR1A; BIRC3; C5AR1; CCR1; CD44; CD52; CDC42BPA; CDC42EP3; CDHR2; CECR2; CELSR2; CMTM2; CSF2RB; CSF3R; CXCR2; DNMBP; DOK3; ERBB2; F2RL1; FGR; FLT1; FPR1; FPR2; G0S2; GCA; GPR160; GPR27; HCAR3; HCK; ICAM1; IL17RA; IL18RAP; IL1R2; IL1RN; ITGAM; ITGB2; ITPKC; LAPTM5; LSP1; LYN; MAP3K14; PECAM1; PILRA; PIM1; PIM3; PLAUR; PLEK; PLK2; PLXNC1; PPP1R15A; P…
Signal transduction	198	3934	27.6151	1.27227	8.11648e-05	0.0144473	0.00722367	0.0367286	ACVR2B; ADGRG3; ADRB2; ANXA1; ARHGAP30; ARRDC3; AVPR1A; BIRC3; C5AR1; CCR1; CD44; CD52; CDC42BPA; CDC42EP3; CDHR2; CECR2; CELSR2; CMTM2; CSF2RB; CSF3R; CXCR2; DNMBP; DOK3; DTX4; ERBB2; F2RL1; FGR; FLT1; FPR1; FPR2; G0S2; GCA; GPR160; GPR27; HCAR3; HCK; ICAM1; IL17RA; IL18RAP; IL1RN; ITGAM; ITGB2; ITPKC; LAPTM5; MAP2K3; LSP1; LYN; MAP3K14; PDE4B; PECAM1; PILRA; PIM1; PIM3; PLAUR; PLEK; PLK2; PLXNC…
Regulation of nucleobase, nucleoside, nucleotide and nucleic acid metabolism	116	2828	16.1785	1.03692	0.34835	1	1	1	BASP1; BAZ1A; BHLHE40; ELMSAN1; FOSL1; FOSL2; GATA4; GATAD2A; HIVEP1; HMGA1; IRF1; JUND; LITAF; CREB5; ZC3H12A; BCL3; MLXIP; MNDA; MXD1; NFATC2; NFIL3; NRIP1; PPRC1; RELB; RFX2; SIN3A; SOX17; SOX7; SP1; STAT3; TLE3; YBX3; ZBTB21; ZBTB43; ZFP36L2; ZNF217; CBX5; HMBOX1; KLF3; MEIS2; NT5E; TIA1; TIGD2; ZNF385B; ZNF652; MYC; FOSB; FOS; ASCL2; CEBPA; DBP; DMRTA1; DNMT3L; HIST1H1A; HIST1H1E; HIST1H2BF;…
RNA metabolism	1	26	0.13947	0.981545	0.650139	1	1	1	SBNO2;
Lipid storage	1	2	0.13947	12.7015	0.0775586	1	1	1	PLIN1;
Lipid transport	1	7	0.13947	3.64194	0.246179	1	1	1	SAA1;
Regulation of physiological process	1	5	0.13947	5.0958	0.182779	1	1	1	CALCA;
Regulation of cell cycle	2	57	0.27894	0.891198	0.665072	1	1	1	CDKN1A; KLF4;
Vesicle-mediated transport	1	17	0.13947	1.50088	0.496669	1	1	1	RPGR;
Regulation of cell proliferation	4	23	0.55788	4.40511	0.0118064	1	0.350255	1	RASSF5; TRAF4; GNL3; WT1;
Immune response	51	576	7.11297	2.23849	6.71465e-08	1.19521e-05	1.19521e-05	6.07701e-05	ALOX5AP; CCL4; CD55; CD83; CD93; CFP; CLC; CLEC4E; CR1; CXCL1; CXCL3; DEFA1B; DEFA3; DEFA1; FCAMR; FCER1G; FCGR2A; FCGR3B; FCN1; HAVCR2; HLA-DPA1; LILRB2; LST1; MX2; NCF4; TREM1; TSLP; HLA-DQA1; CCL14; CD160; C2CD4B; CCL2; CCL20; CCL3; CD274; CSF3; CXCL6; DEFB118; FCAR; FCGR1A; IL1B; IL2RA; IL4R; IL6; MAGEA10; NFKBIZ; PTX3; RAB27A; SRGN; SSX2; THBD;
Anti-apoptosis	6	32	0.83682	4.74589	0.00141005	0.25099	0.0627474	0.319038	SOD2; PRKCZ; RORC; IER3; NAMPT; SERPINB2;
Proteolysis and peptidolysis	1	16	0.13947	1.59463	0.475918	1	1	1	MMP25;
Ion transport	1	48	0.13947	0.531764	0.856306	1	1	1	GRIA3;
Endosome transport	1	3	0.13947	8.48172	0.114055	1	1	1	RAB11FIP1;
Apoptosis	12	220	1.67364	1.37984	0.163683	1	1	1	BCL2A1; BCL6; CASP7; PEG10; RASSF2; TRAF4; CSRNP3; CASP4; GRAMD4; IL24; NR4A1; TNFSF14;
Regulation of gene expression, epigenetic	5	66	0.69735	1.91848	0.119735	1	1	1	BCL6; MAF; BRCA1; HOPX; WT1;
Regulation of immune response	2	8	0.27894	6.34297	0.0373456	1	0.949646	1	BCL6; SLC11A1;
Regulation of cell growth	1	21	0.13947	1.21513	0.571787	1	1	1	TBC1D2;
Protein folding	1	16	0.13947	1.59463	0.475918	1	1	1	CANX;
Negative regulation of enzyme activity	1	3	0.13947	8.48172	0.114055	1	1	1	PRKCZ;
Cytoskeleton organization and biogenesis	2	21	0.27894	2.41824	0.200958	1	1	1	CDC42BPA; VASP;
Cytokine and chemokine mediated signaling pathway	1	4	0.13947	6.36658	0.14911	1	1	1	RPS6KA5;
Cell proliferation	4	39	0.55788	2.59835	0.0670537	1	1	1	SOD2; RNF43; IL15RA; IL4R;
Cell differentiation	1	29	0.13947	0.880041	0.690097	1	1	1	WT1;
Hemopoiesis	1	4	0.13947	6.36658	0.14911	1	1	1	WT1;
DNA repair	1	58	0.13947	0.440096	0.904144	1	1	1	OGG1;
Regulation of signal transduction	1	24	0.13947	1.06331	0.620681	1	1	1	IL1R2;
Cell-cell signaling	1	16	0.13947	1.59463	0.475918	1	1	1	FGF14;
Lipid metabolism	2	33	0.27894	1.53915	0.377378	1	1	1	AGPAT9; PPAP2B;
Cell migration	1	15	0.13947	1.70086	0.454312	1	1	1	VNN2;
Nucleobase, nucleoside, nucleotide and nucleic acid transport	1	7	0.13947	3.64194	0.246179	1	1	1	NABP1;
Regulation of translation	1	13	0.13947	1.96234	0.408396	1	1	1	RPS6KA5;
Regulation of transport	1	3	0.13947	8.48172	0.114055	1	1	1	RPGR;
Microtubule-based process	1	5	0.13947	5.0958	0.182779	1	1	1	MAP1LC3A;
Inflammatory response	4	14	0.55788	7.23495	0.00176985	0.315033	0.0630066	0.320355	MMP25; SLC11A1; PRKCZ; SAA1;
Transcription	2	46	0.27894	1.10426	0.548208	1	1	1	RPS6KA5; ZNF878;
Regulation of enzyme activity	1	5	0.13947	5.0958	0.182779	1	1	1	NCF4;
Protein targeting	1	5	0.13947	5.0958	0.182779	1	1	1	RAB11FIP1;
Protein localization	1	3	0.13947	8.48172	0.114055	1	1	1	RAB27A;
Muscle development	1	5	0.13947	5.0958	0.182779	1	1	1	TAGLN;
Cell death	1	6	0.13947	4.24792	0.215118	1	1	1	RASSF2;
Regulation of protein kinase activity	1	3	0.13947	8.48172	0.114055	1	1	1	HEXIM2;
Innate immune response	1	4	0.13947	6.36658	0.14911	1	1	1	TLR8;

## Sheet: Biological pathway
Analysis: Biological Pathway
Dataset name: SH
Biological pathway	No. of genes in the dataset	No. of genes in the background dataset	Percentage of genes	Fold enrichment	P-value (Hypergeometric test)	Bonferroni method	BH method	Q-value (Storey-Tibshirani method)	genes mapped (from input data set)
The role of Nef in HIV-1 replication and disease pathogenesis	1	27	0.289017	0.679766	0.783656	1	1	1	HCK;
APOBEC3G mediated resistance to HIV-1 infection	1	5	0.289017	3.66477	0.24647	1	1	1	HMGA1;
Nef and signal transduction	1	8	0.289017	2.29219	0.364212	1	1	1	HCK;
Developmental Biology	24	432	6.93642	1.01032	0.511765	1	1	1	ACVR2B; ERBB2; PKLR; PLIN1; PLXNC1; RAC2; RND1; RPS6KA5; TGFB1; VASP; WASL; CDH15; CEBPA; GCK; ONECUT1; RPS4Y1; TDGF1; CEBPD; DPYSL3; FOXO1; KLF4; KLF5; MYH11; SPTBN1;
Sema4D in semaphorin signaling	4	27	1.15607	2.69887	0.0580558	1	0.625472	1	ERBB2; RAC2; RND1; MYH11;
Sema4D mediated inhibition of cell attachment and migration	1	8	0.289017	2.29219	0.364212	1	1	1	RND1;
Sema4D induced cell migration and growth-cone collapse	4	22	1.15607	3.31197	0.0299606	1	0.409626	1	ERBB2; RAC2; RND1; MYH11;
SEMA3A-Plexin repulsion signaling by inhibiting Integrin adhesion	1	14	0.289017	1.31053	0.54749	1	1	1	RND1;
Axon guidance	10	219	2.89017	0.83087	0.773744	1	1	1	ERBB2; PLXNC1; RAC2; RND1; RPS6KA5; VASP; WASL; DPYSL3; MYH11; SPTBN1;
Semaphorin interactions	6	64	1.7341	1.70683	0.138392	1	1	1	ERBB2; PLXNC1; RAC2; RND1; DPYSL3; MYH11;
NCAM signaling for neurite out-growth	2	57	0.578035	0.640926	0.82963	1	1	1	RPS6KA5; SPTBN1;
Other semaphorin interactions	1	16	0.289017	1.14681	0.596013	1	1	1	PLXNC1;
CRMPs in Sema3A signaling	1	16	0.289017	1.14681	0.596013	1	1	1	DPYSL3;
Signal transduction by L1	1	35	0.289017	0.524435	0.862727	1	1	1	RPS6KA5;
CDO in myogenesis	1	24	0.289017	0.764701	0.743455	1	1	1	CDH15;
Myogenesis	1	24	0.289017	0.764701	0.743455	1	1	1	CDH15;
Regulation of gene expression in late stage (branching morphogenesis) pancreatic bud precursor cells	1	6	0.289017	3.05499	0.287953	1	1	1	ONECUT1;
Regulation of gene expression in early pancreatic precursor cells	1	6	0.289017	3.05499	0.287953	1	1	1	ONECUT1;
Regulation of beta-cell development	5	108	1.44509	0.843211	0.716718	1	1	1	PKLR; GCK; ONECUT1; RPS4Y1; FOXO1;
Signaling by Robo receptor	1	23	0.289017	0.797935	0.728463	1	1	1	VASP;
Recycling pathway of L1	1	32	0.289017	0.573586	0.837183	1	1	1	RPS6KA5;
L1CAM interactions	2	79	0.578035	0.462463	0.93703	1	1	1	RPS6KA5; SPTBN1;
Interaction between L1 and Ankyrins	1	12	0.289017	1.52877	0.493158	1	1	1	SPTBN1;
Platelet Adhesion to exposed collagen	3	13	0.867052	4.20583	0.031258	1	0.413797	1	FCER1G; LYN; COL1A2;
Platelet sensitization by LDL	2	8	0.578035	4.56169	0.0677887	1	0.715643	1	FGR; PECAM1;
Reduction of cytosolic Ca++ levels	1	10	0.289017	1.83421	0.432324	1	1	1	ATP2B4;
Platelet calcium homeostasis	1	16	0.289017	1.14681	0.596013	1	1	1	ATP2B4;
Platelet activation, signaling and aggregation	6	138	1.7341	0.791638	0.77915	1	1	1	FCER1G; LYN; PLEK; PTPN1; RAC2; PRKCZ;
Transcriptional Regulation of White Adipocyte Differentiation	6	69	1.7341	1.58316	0.177621	1	1	1	PLIN1; TGFB1; CEBPA; CEBPD; KLF4; KLF5;
Regulation of gene expression in beta cells	4	98	1.15607	0.743767	0.795823	1	1	1	PKLR; GCK; RPS4Y1; FOXO1;
Signaling by NODAL	2	16	0.578035	2.28227	0.218804	1	1	1	ACVR2B; TDGF1;
AKT-mediated inactivation of FOXO1A	1	3	0.289017	6.09983	0.156136	1	1	1	FOXO1;
Hemostasis	29	375	8.3815	1.40627	0.0376993	1	0.48614	1	FCER1G; FGR; GATA4; IRF1; ITGAM; ITGB2; LYN; SLC16A3; PECAM1; PLAUR; PLEK; PTPN1; RAC2; SELL; SIN3A; TREM1; CBX5; COL1A2; HIST1H3C; KIF22; PRKCZ; ATP2B4; F3; MAFF; NFE2; OLR1; SERPINB2; SERPINE1; THBD;
Platelet homeostasis	3	40	0.867052	1.3676	0.378974	1	1	1	FGR; PECAM1; ATP2B4;
Cell surface interactions at the vascular wall	10	72	2.89017	2.52699	0.00565029	1	0.10833	0.485886	FCER1G; ITGAM; ITGB2; LYN; SLC16A3; PECAM1; SELL; TREM1; OLR1; THBD;
Dissolution of Fibrin Clot	3	10	0.867052	5.46632	0.0148237	1	0.240058	1	PLAUR; SERPINB2; SERPINE1;
Platelet degranulation	1	28	0.289017	0.655497	0.795608	1	1	1	PLEK;
Response to elevated platelet cytosolic Ca2+	1	39	0.289017	0.470661	0.890678	1	1	1	PLEK;
Common Pathway	1	16	0.289017	1.14681	0.596013	1	1	1	THBD;
Formation of Fibrin Clot (Clotting Cascade)	2	33	0.578035	1.10691	0.549117	1	1	1	F3; THBD;
Extrinsic Pathway	1	5	0.289017	3.66477	0.24647	1	1	1	F3;
GPVI-mediated activation cascade	4	27	1.15607	2.69887	0.0580558	1	0.625472	1	FCER1G; LYN; RAC2; PRKCZ;
Platelet Aggregation (Plug Formation)	1	29	0.289017	0.632902	0.806901	1	1	1	PTPN1;
Integrin alphaIIb beta3 signaling	1	20	0.289017	0.917565	0.678043	1	1	1	PTPN1;
Mitotic Prometaphase	1	99	0.289017	0.185441	0.996471	1	1	1	CENPQ;
Mitotic Prophase	1	62	0.289017	0.296089	0.970563	1	1	1	NINL;
Golgi Cisternae Pericentriolar Stack Reorganization	1	62	0.289017	0.296089	0.970563	1	1	1	NINL;
Mitotic M-M/G1 phases	2	242	0.578035	0.150982	0.999987	1	1	1	CENPQ; NINL;
M Phase	2	158	0.578035	0.231246	0.998781	1	1	1	CENPQ; NINL;
DNA Replication	4	261	1.15607	0.279286	0.999777	1	1	1	CENPQ; GINS2; NINL; CDKN1A;
PECAM1 interactions	1	7	0.289017	2.61918	0.327159	1	1	1	PECAM1;
Basigin interactions	1	9	0.289017	2.03779	0.39923	1	1	1	SLC16A3;
Factors involved in megakaryocyte development and platelet production	8	119	2.31214	1.22352	0.33128	1	1	1	GATA4; IRF1; SIN3A; CBX5; HIST1H3C; KIF22; MAFF; NFE2;
Kinesins	1	21	0.289017	0.873892	0.69581	1	1	1	KIF22;
Netrin-1 signaling	1	45	0.289017	0.40792	0.922327	1	1	1	WASL;
DCC mediated attractive signaling	1	10	0.289017	1.83421	0.432324	1	1	1	WASL;
Neurotransmitter Receptor Binding And Downstream Transmission In The Postsynaptic Cell	1	89	0.289017	0.206274	0.993731	1	1	1	CACNG2;
Glutamate Binding, Activation of AMPA Receptors and Synaptic Plasticity	1	21	0.289017	0.873892	0.69581	1	1	1	CACNG2;
Trafficking of AMPA receptors	1	21	0.289017	0.873892	0.69581	1	1	1	CACNG2;
Neuronal System	1	188	0.289017	0.0976569	0.99998	1	1	1	CACNG2;
Smooth Muscle Contraction	3	24	0.867052	2.27896	0.142611	1	1	1	MYL6B; ACTG2; MYH11;
Striated Muscle Contraction	1	30	0.289017	0.611812	0.817572	1	1	1	TCAP;
Muscle contraction	4	50	1.15607	1.45764	0.295118	1	1	1	MYL6B; TCAP; ACTG2; MYH11;
Transmission across Chemical Synapses	1	121	0.289017	0.151727	0.999006	1	1	1	CACNG2;
Vpr-mediated nuclear import of PICs	1	31	0.289017	0.592083	0.827655	1	1	1	HMGA1;
Interactions of Vpr with host cellular proteins	1	34	0.289017	0.539855	0.85469	1	1	1	HMGA1;
Host Interactions of HIV factors	2	141	0.578035	0.259125	0.997059	1	1	1	HCK; HMGA1;
Autointegration results in viral DNA circles	1	3	0.289017	6.09983	0.156136	1	1	1	HMGA1;
Early Phase of HIV Life Cycle	1	11	0.289017	1.66762	0.4636	1	1	1	HMGA1;
Integration of provirus	1	8	0.289017	2.29219	0.364212	1	1	1	HMGA1;
2-LTR circle formation	1	7	0.289017	2.61918	0.327159	1	1	1	HMGA1;
HIV Life Cycle	1	103	0.289017	0.17824	0.997196	1	1	1	HMGA1;
HIV Infection	2	203	0.578035	0.179987	0.999888	1	1	1	HCK; HMGA1;
PI3K/AKT activation	3	30	0.867052	1.82332	0.226735	1	1	1	CDKN1A; IRS2; NR4A1;
Signalling to STAT3	1	3	0.289017	6.09983	0.156136	1	1	1	STAT3;
Nuclear Events (kinase and transcription factor activation)	1	15	0.289017	1.22322	0.572437	1	1	1	RPS6KA5;
ERK/MAPK targets	1	12	0.289017	1.52877	0.493158	1	1	1	RPS6KA5;
Insulin receptor recycling	1	28	0.289017	0.655497	0.795608	1	1	1	IRS2;
Signal attenuation	1	11	0.289017	1.66762	0.4636	1	1	1	IRS2;
SOS-mediated signalling	1	15	0.289017	1.22322	0.572437	1	1	1	IRS2;
p75 NTR receptor-mediated signalling	1	39	0.289017	0.470661	0.890678	1	1	1	PRKCI;
Signalling by NGF	7	143	2.02312	0.891075	0.679375	1	1	1	PRKCI; RALGDS; RPS6KA5; STAT3; CDKN1A; IRS2; NR4A1;
p38MAPK events	1	9	0.289017	2.03779	0.39923	1	1	1	RALGDS;
Signalling to RAS	1	21	0.289017	0.873892	0.69581	1	1	1	RALGDS;
Signalling to ERKs	1	30	0.289017	0.611812	0.817572	1	1	1	RALGDS;
p75NTR recruits signalling complexes	1	13	0.289017	1.41126	0.521092	1	1	1	PRKCI;
p75NTR signals via NF-kB	1	16	0.289017	1.14681	0.596013	1	1	1	PRKCI;
NGF signalling via TRKA from the plasma membrane	6	107	1.7341	1.02097	0.541126	1	1	1	RALGDS; RPS6KA5; STAT3; CDKN1A; IRS2; NR4A1;
AKT phosphorylates targets in the nucleus	1	4	0.289017	4.57867	0.202577	1	1	1	NR4A1;
PIP3 activates AKT signaling	2	21	0.578035	1.73913	0.322709	1	1	1	CDKN1A; NR4A1;
AKT phosphorylates targets in the cytosol	1	9	0.289017	2.03779	0.39923	1	1	1	CDKN1A;
Signaling by FGFR	2	95	0.578035	0.384582	0.970602	1	1	1	CDKN1A; NR4A1;
GAB1 signalosome	2	32	0.578035	1.14149	0.53231	1	1	1	CDKN1A; NR4A1;
IRS activation	1	5	0.289017	3.66477	0.24647	1	1	1	IRS2;
IRS-mediated signalling	1	51	0.289017	0.359939	0.944833	1	1	1	IRS2;
PI3K Cascade	1	38	0.289017	0.483043	0.884273	1	1	1	IRS2;
IRS-related events	1	53	0.289017	0.346359	0.950782	1	1	1	IRS2;
Signaling by Insulin receptor	1	79	0.289017	0.232382	0.988874	1	1	1	IRS2;
Insulin receptor signalling cascade	1	56	0.289017	0.327807	0.958529	1	1	1	IRS2;
PI-3K cascade	2	27	0.578035	1.3528	0.44214	1	1	1	CDKN1A; NR4A1;
Downstream signaling of activated FGFR	2	66	0.578035	0.55354	0.885612	1	1	1	CDKN1A; NR4A1;
Signaling by EGFR	2	98	0.578035	0.372811	0.974584	1	1	1	CDKN1A; NR4A1;
Signal Transduction	54	1208	15.6069	0.812768	0.967929	1	1	1	ACVR2B; ADRB2; ANXA1; AVPR1A; C5AR1; CCL4; CD55; CXCR2; F2RL1; FLT1; FPR1; FPR2; FRAT2; HCAR3; ITGAM; ITGB2; MMP9; PDE11A; PDE4B; PECAM1; PPP3R1; PRKCI; PROK2; PTPN1; RAC2; RALGDS; RPS6KA5; STAT3; TGFB1; COL1A2; FRAT1; GNAO1; GRAP; P2RY2; WNT5A; CALCA; CCL2; CCL20; CCL3; CDKN1A; FZD7; IRS2; NR4A1; OR1M1; OR2J3; OR2L8; OR4F21; OR4F29; OR4F3; OR4F5; RGS1; RGS2; SOCS1; THBS1;
Loss of Nlp from mitotic centrosomes	1	61	0.289017	0.300942	0.968832	1	1	1	NINL;
Loss of proteins required for interphase microtubule organizationÃÂ from the centrosome	1	61	0.289017	0.300942	0.968832	1	1	1	NINL;
Mitotic G2-G2/M phases	1	99	0.289017	0.185441	0.996471	1	1	1	NINL;
G2/M Transition	1	96	0.289017	0.191235	0.995806	1	1	1	NINL;
Recruitment of mitotic centrosome proteins and complexes	1	70	0.289017	0.262255	0.981371	1	1	1	NINL;
Centrosome maturation	1	70	0.289017	0.262255	0.981371	1	1	1	NINL;
SCF(Skp2)-mediated degradation of p27/p21	1	67	0.289017	0.273996	0.977883	1	1	1	CDKN1A;
Cyclin E associated events during G1/S transition	2	78	0.578035	0.468391	0.93402	1	1	1	MYC; CDKN1A;
G1/S Transition	2	117	0.578035	0.312274	0.990055	1	1	1	MYC; CDKN1A;
S Phase	3	121	0.867052	0.452176	0.96648	1	1	1	MYC; GINS2; CDKN1A;
Cyclin A:Cdk2-associated events at S phase entry	2	90	0.578035	0.405946	0.962598	1	1	1	MYC; CDKN1A;
G1 Phase	1	31	0.289017	0.592083	0.827655	1	1	1	CDKN1A;
Mitotic G1-G1/S phases	2	140	0.578035	0.260975	0.996904	1	1	1	MYC; CDKN1A;
Cell Cycle, Mitotic	5	317	1.44509	0.287295	0.999928	1	1	1	MYC; CENPQ; GINS2; NINL; CDKN1A;
Cyclin D associated events in G1	1	31	0.289017	0.592083	0.827655	1	1	1	CDKN1A;
Synthesis, Secretion, and Deacylation of Ghrelin	1	16	0.289017	1.14681	0.596013	1	1	1	KLF4;
Unfolded Protein Response	5	63	1.44509	1.44541	0.264548	1	1	1	HSP90B1; IGFBP1; ATF3; CCL2; ERN1;
Insulin Synthesis and Processing	3	132	0.867052	0.414498	0.979265	1	1	1	TRAM1; RPS4Y1; RAB27A;
Activation of Chaperones by IRE1alpha	1	45	0.289017	0.40792	0.922327	1	1	1	ERN1;
Activation of Chaperones by ATF6-alpha	1	9	0.289017	2.03779	0.39923	1	1	1	HSP90B1;
Regulation of Insulin-like Growth Factor (IGF) Activity by Insulin-like Growth Factor Binding Proteins (IGFBPs)	3	14	0.867052	3.90563	0.0382015	1	0.48614	1	IGFBP2; IGFBP1; PAPPA;
PERK regulated gene expression	3	11	0.867052	4.96983	0.019565	1	0.291378	1	IGFBP1; ATF3; CCL2;
Telomere Maintenance	2	49	0.578035	0.745545	0.760361	1	1	1	HIST1H4B; HIST1H4E;
Diabetes pathways	11	216	3.17919	0.926566	0.649472	1	1	1	HSP90B1; TRAM1; IGFBP2; IGFBP1; RPS4Y1; ATF3; CCL2; ERN1; KLF4; PAPPA; RAB27A;
Packaging Of Telomere Ends	2	21	0.578035	1.73913	0.322709	1	1	1	HIST1H4B; HIST1H4E;
Nucleosome assembly	3	35	0.867052	1.56292	0.302352	1	1	1	CENPQ; HIST1H4B; HIST1H4E;
Deposition of New CENPA-containing Nucleosomes at the Centromere	3	35	0.867052	1.56292	0.302352	1	1	1	CENPQ; HIST1H4B; HIST1H4E;
Removal of licensing factors from origins	1	85	0.289017	0.21598	0.992113	1	1	1	CDKN1A;
Chromosome Maintenance	3	69	0.867052	0.792898	0.740161	1	1	1	CENPQ; HIST1H4B; HIST1H4E;
Regulation of DNA replication	1	88	0.289017	0.208618	0.99336	1	1	1	CDKN1A;
Synthesis of DNA	2	109	0.578035	0.335191	0.985188	1	1	1	GINS2; CDKN1A;
Switching of origins to a post-replicative state	1	83	0.289017	0.221184	0.991154	1	1	1	CDKN1A;
Orc1 removal from chromatin	1	83	0.289017	0.221184	0.991154	1	1	1	CDKN1A;
DNA strand elongation	1	31	0.289017	0.592083	0.827655	1	1	1	GINS2;
Unwinding of DNA	1	11	0.289017	1.66762	0.4636	1	1	1	GINS2;
Signaling by BMP	1	19	0.289017	0.965833	0.659242	1	1	1	ACVR2B;
Signaling by TGF beta	1	13	0.289017	1.41126	0.521092	1	1	1	TGFB1;
Chemokine receptors bind chemokines	5	42	1.44509	2.16794	0.0786119	1	0.799541	1	CCL4; CXCR2; CCL2; CCL20; CCL3;
Vasopressin-like receptors	1	6	0.289017	3.05499	0.287953	1	1	1	AVPR1A;
Signaling by GPCR	33	800	9.53757	0.750089	0.975366	1	1	1	ADRB2; ANXA1; AVPR1A; C5AR1; CCL4; CD55; CXCR2; F2RL1; FPR1; FPR2; HCAR3; PDE11A; PDE4B; PPP3R1; PROK2; RAC2; GNAO1; P2RY2; WNT5A; CALCA; CCL2; CCL20; CCL3; FZD7; OR1M1; OR2J3; OR2L8; OR4F21; OR4F29; OR4F3; OR4F5; RGS1; RGS2;
GPCR ligand binding	19	336	5.49133	1.02847	0.485217	1	1	1	ADRB2; ANXA1; AVPR1A; C5AR1; CCL4; CD55; CXCR2; F2RL1; FPR1; FPR2; HCAR3; PROK2; P2RY2; WNT5A; CALCA; CCL2; CCL20; CCL3; FZD7;
Class A/1 (Rhodopsin-like receptors)	15	274	4.33526	0.995811	0.547212	1	1	1	ADRB2; ANXA1; AVPR1A; C5AR1; CCL4; CXCR2; F2RL1; FPR1; FPR2; HCAR3; PROK2; P2RY2; CCL2; CCL20; CCL3;
Peptide ligand-binding receptors	12	167	3.46821	1.30726	0.207589	1	1	1	ANXA1; AVPR1A; C5AR1; CCL4; CXCR2; F2RL1; FPR1; FPR2; PROK2; CCL2; CCL20; CCL3;
CREB phosphorylation	1	7	0.289017	2.61918	0.327159	1	1	1	RPS6KA5;
Signaling by PDGF	2	78	0.578035	0.468391	0.93402	1	1	1	CDKN1A; NR4A1;
Downstream signal transduction	2	75	0.578035	0.487124	0.924155	1	1	1	CDKN1A; NR4A1;
Signaling by VEGF	1	5	0.289017	3.66477	0.24647	1	1	1	FLT1;
VEGF ligand-receptor interactions	1	5	0.289017	3.66477	0.24647	1	1	1	FLT1;
VEGF binds to VEGFR leading to receptor dimerization	1	3	0.289017	6.09983	0.156136	1	1	1	FLT1;
Neurophilin interactions with VEGF and VEGFR	1	4	0.289017	4.57867	0.202577	1	1	1	FLT1;
Signaling by SCF-KIT	6	66	1.7341	1.65511	0.153563	1	1	1	MMP9; STAT3; GRAP; CDKN1A; NR4A1; SOCS1;
Regulation of KIT signaling	1	9	0.289017	2.03779	0.39923	1	1	1	SOCS1;
G alpha (i) signalling events	1	31	0.289017	0.592083	0.827655	1	1	1	RGS1;
G alpha (s) signalling events	2	31	0.578035	1.1783	0.51508	1	1	1	PDE11A; PDE4B;
GPCR downstream signaling	16	530	4.62428	0.549123	0.998265	1	1	1	AVPR1A; F2RL1; FPR2; PDE11A; PDE4B; RAC2; P2RY2; OR1M1; OR2J3; OR2L8; OR4F21; OR4F29; OR4F3; OR4F5; RGS1; RGS2;
Calcitonin-like ligand receptors	1	8	0.289017	2.29219	0.364212	1	1	1	CALCA;
G alpha (12/13) signalling events	1	21	0.289017	0.873892	0.69581	1	1	1	RAC2;
G alpha (q) signalling events	5	120	1.44509	0.758897	0.797932	1	1	1	AVPR1A; F2RL1; FPR2; P2RY2; RGS2;
G-protein activation	1	13	0.289017	1.41126	0.521092	1	1	1	GNAO1;
Opioid Signalling	3	53	0.867052	1.03222	0.564432	1	1	1	PDE4B; PPP3R1; GNAO1;
PLC beta mediated events	1	39	0.289017	0.470661	0.890678	1	1	1	GNAO1;
G-protein mediated events	1	40	0.289017	0.458897	0.896729	1	1	1	GNAO1;
Olfactory Signaling Pathway	7	349	2.02312	0.365126	0.99974	1	1	1	OR1M1; OR2J3; OR2L8; OR4F21; OR4F29; OR4F3; OR4F5;
Amine ligand-binding receptors	1	36	0.289017	0.509872	0.87032	1	1	1	ADRB2;
Formyl peptide receptors bind formyl peptides and many other ligands	3	5	0.867052	10.9217	0.0015187	1	0.0333314	0.1495	ANXA1; FPR1; FPR2;
Adrenoceptors	1	9	0.289017	2.03779	0.39923	1	1	1	ADRB2;
P2Y receptors	1	11	0.289017	1.66762	0.4636	1	1	1	P2RY2;
Nucleotide-like (purinergic) receptors	1	15	0.289017	1.22322	0.572437	1	1	1	P2RY2;
Class B/2 (Secretin family receptors)	4	47	1.15607	1.55066	0.257778	1	1	1	CD55; WNT5A; CALCA; FZD7;
Adaptive Immune System	13	237	3.75723	0.997868	0.546307	1	1	1	ITGB2; MAP3K14; PECAM1; SELL; VASP; CANX; SEC61A1; CD160; CD274; FCGR1A; MAP3K8; PVR; SPTBN1;
TCR signaling	1	47	0.289017	0.390565	0.930696	1	1	1	VASP;
Immune System	42	522	12.1387	1.46297	0.00717257	1	0.134425	0.602931	CD44; CSF2RB; ICAM1; IL1R2; IL1RN; IRF1; ITGB2; MAP2K3; LYN; MAP3K14; MX2; PECAM1; PTPN1; RPS6KA5; SELL; SIGIRR; SOCS3; TLR1; TLR2; TLR8; VASP; CANX; SEC61A1; FOS; CD160; IFIT2; CD274; CISH; EGR1; FCGR1A; IL1B; IL2RA; IL6; IRAK3; IRS2; JUN; MAP3K8; NFKB2; PVR; SOCS1; SOCS2; SPTBN1;
DARPP-32 events	2	18	0.578035	2.02883	0.260376	1	1	1	PDE4B; PPP3R1;
Signaling by Wnt	2	75	0.578035	0.487124	0.924155	1	1	1	FRAT2; FRAT1;
Degradation of beta-catenin by the destruction complex	2	75	0.578035	0.487124	0.924155	1	1	1	FRAT2; FRAT1;
Beta-catenin phosphorylation cascade	2	7	0.578035	5.21244	0.0527193	1	0.614935	1	FRAT2; FRAT1;
Integrin cell surface interactions	6	72	1.7341	1.51721	0.203093	1	1	1	ITGAM; ITGB2; PECAM1; PTPN1; COL1A2; THBS1;
Gene Expression	2	378	0.578035	0.0966619	1	1	1	1	EIF4A2; RPS4Y1;
Pyrimidine biosynthesis	1	6	0.289017	3.05499	0.287953	1	1	1	DHODH;
Pyrimidine catabolism	1	10	0.289017	1.83421	0.432324	1	1	1	NT5E;
Pyrimidine metabolism	2	22	0.578035	1.66012	0.343242	1	1	1	DHODH; NT5E;
Purine catabolism	1	11	0.289017	1.66762	0.4636	1	1	1	NT5E;
Androgen biosynthesis	1	8	0.289017	2.29219	0.364212	1	1	1	SRD5A2;
Vitamin A uptake in enterocytes	1	7	0.289017	2.61918	0.327159	1	1	1	PNLIP;
Vitamin D (calciferol) metabolism	1	7	0.289017	2.61918	0.327159	1	1	1	CYP27B1;
Base Excision Repair	1	19	0.289017	0.965833	0.659242	1	1	1	OGG1;
DNA Repair	3	106	0.867052	0.516158	0.936864	1	1	1	FANCL; BRCA1; OGG1;
Amino acid and oligopeptide SLC transporters	2	48	0.578035	0.761074	0.750171	1	1	1	SLC6A6; SLC7A1;
Sphingolipid metabolism	3	29	0.867052	1.88617	0.212046	1	1	1	SGMS2; SPHK2; PPAP2B;
Prostanoid metabolism	4	13	1.15607	5.60312	0.00432728	1	0.0849165	0.380872	ALOX5; DPEP2; PTGS2; ZFP36;
Leukotriene synthesis	3	9	0.867052	6.07302	0.0108116	1	0.187851	0.84256	ALOX5; DPEP2; ZFP36;
Bile acid and bile salt metabolism	3	27	0.867052	2.02584	0.183364	1	1	1	ABCB11; CYP7A1; CH25H;
Synthesis of bile acids and bile salts	3	19	0.867052	2.87837	0.0831876	1	0.829736	1	ABCB11; CYP7A1; CH25H;
Synthesis of bile acids and bile salts via 7alpha-hydroxycholesterol	2	15	0.578035	2.43432	0.19823	1	1	1	ABCB11; CYP7A1;
Metabolism of steroid hormones and vitamins A and D	3	32	0.867052	1.7094	0.256641	1	1	1	SRD5A2; CYP27B1; PNLIP;
Recycling of bile acids and salts	1	11	0.289017	1.66762	0.4636	1	1	1	ABCB11;
Regulation of Lipid Metabolism by Peroxisome proliferator-activated receptor alpha (PPARalpha)	4	32	1.15607	2.27731	0.096319	1	0.93407	1	FASN; CYP7A1; FADS1; GRHL1;
Homologous Recombination Repair	1	22	0.289017	0.834188	0.712599	1	1	1	BRCA1;
Double-Strand Break Repair	1	27	0.289017	0.679766	0.783656	1	1	1	BRCA1;
ATM mediated response to DNA double-strand break	1	6	0.289017	3.05499	0.287953	1	1	1	BRCA1;
Homologous recombination repair of replication-independent double-strand breaks	1	22	0.289017	0.834188	0.712599	1	1	1	BRCA1;
ATM mediated phosphorylation of repair proteins	1	6	0.289017	3.05499	0.287953	1	1	1	BRCA1;
Recruitment of repair and signaling proteins to double-strand breaks	1	8	0.289017	2.29219	0.364212	1	1	1	BRCA1;
Removal of DNA patch containing abasic residue	1	17	0.289017	1.07939	0.618292	1	1	1	OGG1;
Resolution of AP sites via the multiple-nucleotide patch replacement pathway	1	17	0.289017	1.07939	0.618292	1	1	1	OGG1;
Depurination	1	3	0.289017	6.09983	0.156136	1	1	1	OGG1;
Base-Excision Repair, AP Site Formation	1	8	0.289017	2.29219	0.364212	1	1	1	OGG1;
Cleavage of the damaged purine	1	3	0.289017	6.09983	0.156136	1	1	1	OGG1;
Recognition and association of DNA glycosylase with site containing an affected purine	1	3	0.289017	6.09983	0.156136	1	1	1	OGG1;
Resolution of Abasic Sites (AP sites)	1	19	0.289017	0.965833	0.659242	1	1	1	OGG1;
Resolution of AP sites via the single-nucleotide replacement pathway	1	12	0.289017	1.52877	0.493158	1	1	1	OGG1;
Base-free sugar-phosphate removal via the single-nucleotide replacement pathway	1	10	0.289017	1.83421	0.432324	1	1	1	OGG1;
Displacement of DNA glycosylase by APE1	1	9	0.289017	2.03779	0.39923	1	1	1	OGG1;
Metabolism	27	823	7.80347	0.596599	0.999462	1	1	1	BBOX1; DHODH; FASN; GATA4; HMOX1; PKLR; SLC2A3; WASL; CYP2C9; CYP3A5; PAH; EIF4A2; NAT2; NT5E; CYP7A1; ACSS2; CPOX; FMO1; IDO2; NAGS; RPS4Y1; ARG2; CYP27B1; CYP2F1; NAMPT; PTGS2; ZFP36;
L13a-mediated translational silencing of Ceruloplasmin expression	2	102	0.578035	0.358192	0.979092	1	1	1	EIF4A2; RPS4Y1;
NOSTRIN mediated eNOS trafficking	1	4	0.289017	4.57867	0.202577	1	1	1	WASL;
Purine metabolism	1	24	0.289017	0.764701	0.743455	1	1	1	NT5E;
Metabolism of nucleotides	2	58	0.578035	0.629877	0.836892	1	1	1	DHODH; NT5E;
eNOS activation and regulation	1	18	0.289017	1.01946	0.639346	1	1	1	WASL;
Metabolism of nitric oxide	1	18	0.289017	1.01946	0.639346	1	1	1	WASL;
3' -UTR-mediated translational regulation	2	102	0.578035	0.358192	0.979092	1	1	1	EIF4A2; RPS4Y1;
Amine compound SLC transporters	1	29	0.289017	0.632902	0.806901	1	1	1	SLC6A6;
Fanconi Anemia pathway	2	22	0.578035	1.66012	0.343242	1	1	1	FANCL; BRCA1;
p53-Dependent G1 DNA Damage Response	1	72	0.289017	0.254971	0.983386	1	1	1	CDKN1A;
p53-Dependent G1/S DNA damage checkpoint	1	72	0.289017	0.254971	0.983386	1	1	1	CDKN1A;
G1/S DNA Damage Checkpoints	1	76	0.289017	0.241553	0.986787	1	1	1	CDKN1A;
Cell Cycle Checkpoints	1	118	0.289017	0.155584	0.998819	1	1	1	CDKN1A;
Transcriptional activation of p53 responsive genes	1	2	0.289017	9.13457	0.106998	1	0.944302	1	CDKN1A;
Transcriptional activation of cell cycle inhibitor p21	1	2	0.289017	9.13457	0.106998	1	0.944302	1	CDKN1A;
Synthesis of substrates in N-glycan biosythesis	1	16	0.289017	1.14681	0.596013	1	1	1	GFPT2;
Biosynthesis of the N-glycan precursor (dolichol lipid-linked oligosaccharide, LLO) and transfer to a nascent protein	1	30	0.289017	0.611812	0.817572	1	1	1	GFPT2;
Post-translational modification: synthesis of GPI-anchored proteins	1	26	0.289017	0.705901	0.771007	1	1	1	PLAUR;
Asparagine N-linked glycosylation	5	77	1.44509	1.18264	0.418574	1	1	1	CANX; LMAN1; MANEA; MCFD2; GFPT2;
Attachment of GPI anchor to uPAR	1	7	0.289017	2.61918	0.327159	1	1	1	PLAUR;
Synthesis of UDP-N-acetyl-glucosamine	1	5	0.289017	3.66477	0.24647	1	1	1	GFPT2;
N-glycan trimming in the ER and Calnexin/Calreticulin cycle	1	13	0.289017	1.41126	0.521092	1	1	1	CANX;
Calnexin/calreticulin cycle	1	12	0.289017	1.52877	0.493158	1	1	1	CANX;
N-glycan trimming and elongation in the cis-Golgi	1	5	0.289017	3.66477	0.24647	1	1	1	MANEA;
Transport to the Golgi and subsequent modification	3	28	0.867052	1.95351	0.197578	1	1	1	LMAN1; MANEA; MCFD2;
Post-chaperonin tubulin folding pathway	1	12	0.289017	1.52877	0.493158	1	1	1	TUBB6;
Post-translational protein modification	6	114	1.7341	0.958284	0.604057	1	1	1	PLAUR; CANX; LMAN1; MANEA; MCFD2; GFPT2;
Eukaryotic Translation Termination	1	82	0.289017	0.223881	0.990632	1	1	1	RPS4Y1;
Protein folding	1	28	0.289017	0.655497	0.795608	1	1	1	TUBB6;
Eukaryotic Translation Elongation	1	85	0.289017	0.21598	0.992113	1	1	1	RPS4Y1;
Peptide chain elongation	1	82	0.289017	0.223881	0.990632	1	1	1	RPS4Y1;
Ribosomal scanning and start codon recognition	2	54	0.578035	0.676526	0.806072	1	1	1	EIF4A2; RPS4Y1;
GTP hydrolysis and joining of the 60S ribosomal subunit	2	103	0.578035	0.354715	0.980092	1	1	1	EIF4A2; RPS4Y1;
Translation initiation complex formation	2	54	0.578035	0.676526	0.806072	1	1	1	EIF4A2; RPS4Y1;
Activation of the mRNA upon binding of the cap-binding complex and eIFs, and subsequent binding to 43S	2	55	0.578035	0.664228	0.814229	1	1	1	EIF4A2; RPS4Y1;
Formation of the ternary complex, and subsequently, the 43S complex	1	47	0.289017	0.390565	0.930696	1	1	1	RPS4Y1;
Translation	2	117	0.578035	0.312274	0.990055	1	1	1	EIF4A2; RPS4Y1;
Eukaryotic Translation Initiation	2	110	0.578035	0.332144	0.985904	1	1	1	EIF4A2; RPS4Y1;
Cap-dependent Translation Initiation	2	110	0.578035	0.332144	0.985904	1	1	1	EIF4A2; RPS4Y1;
Formation of a pool of free 40S subunits	1	92	0.289017	0.199549	0.994723	1	1	1	RPS4Y1;
Influenza Virus Induced Apoptosis	1	2	0.289017	9.13457	0.106998	1	0.944302	1	TGFB1;
Metabolism of proteins	9	259	2.60116	0.63237	0.953129	1	1	1	PLAUR; CANX; LMAN1; MANEA; MCFD2; EIF4A2; RPS4Y1; GFPT2; TUBB6;
Assembly of Viral Components at the Budding Site	1	2	0.289017	9.13457	0.106998	1	0.944302	1	CANX;
Host Interactions with Influenza Factors	1	5	0.289017	3.66477	0.24647	1	1	1	TGFB1;
Viral mRNA Translation	1	82	0.289017	0.223881	0.990632	1	1	1	RPS4Y1;
Virus Assembly and Release	1	2	0.289017	9.13457	0.106998	1	0.944302	1	CANX;
Influenza Viral RNA Transcription and Replication	1	98	0.289017	0.187333	0.996262	1	1	1	RPS4Y1;
Influenza Life Cycle	2	135	0.578035	0.270641	0.996	1	1	1	CANX; RPS4Y1;
Influenza Infection	3	140	0.867052	0.390814	0.985487	1	1	1	TGFB1; CANX; RPS4Y1;
Meiotic Synapsis	5	47	1.44509	1.93736	0.114046	1	0.992493	1	LMNB1; BRCA1; HIST1H4B; HIST1H4E; STAG3;
Meiotic Recombination	3	42	0.867052	1.3025	0.409227	1	1	1	BRCA1; HIST1H4B; HIST1H4E;
Meiosis	5	72	1.44509	1.26476	0.363076	1	1	1	LMNB1; BRCA1; HIST1H4B; HIST1H4E; STAG3;
Vitamins	1	6	0.289017	3.05499	0.287953	1	1	1	CYP27B1;
FMO oxidizes nucleophiles	1	3	0.289017	6.09983	0.156136	1	1	1	FMO1;
COX reactions	1	1	0.289017	18.1787	0.0550079	1	0.623071	1	PTGS2;
Acetylation	1	2	0.289017	9.13457	0.106998	1	0.944302	1	NAT2;
Phase II conjugation	1	39	0.289017	0.470661	0.890678	1	1	1	NAT2;
Ethanol oxidation	1	4	0.289017	4.57867	0.202577	1	1	1	ACSS2;
Bile salt and organic anion SLC transporters	1	12	0.289017	1.52877	0.493158	1	1	1	SLC16A3;
Regulation of Insulin Secretion	1	48	0.289017	0.38243	0.934537	1	1	1	GATA4;
Integration of energy metabolism	3	83	0.867052	0.659172	0.843268	1	1	1	FASN; GATA4; PKLR;
Carnitine synthesis	1	4	0.289017	4.57867	0.202577	1	1	1	BBOX1;
Phenylalanine and tyrosine catabolism	1	9	0.289017	2.03779	0.39923	1	1	1	PAH;
Urea cycle	2	9	0.578035	4.0554	0.0840679	1	0.829736	1	NAGS; ARG2;
Tryptophan catabolism	1	11	0.289017	1.66762	0.4636	1	1	1	IDO2;
ChREBP activates metabolic gene expression	2	6	0.578035	6.07973	0.0390544	1	0.48614	1	FASN; PKLR;
Heme degradation	1	3	0.289017	6.09983	0.156136	1	1	1	HMOX1;
Biological oxidations	9	98	2.60116	1.67116	0.0889839	1	0.867983	1	CYP2C9; CYP3A5; NAT2; CYP7A1; ACSS2; FMO1; CYP27B1; CYP2F1; PTGS2;
Metabolism of porphyrins	2	10	0.578035	3.65027	0.101379	1	0.944302	1	HMOX1; CPOX;
Heme biosynthesis	1	7	0.289017	2.61918	0.327159	1	1	1	CPOX;
Endogenous sterols	1	15	0.289017	1.22322	0.572437	1	1	1	CYP7A1;
Phase 1 - Functionalization of compounds	8	60	2.31214	2.42645	0.0161497	1	0.259017	1	CYP2C9; CYP3A5; CYP7A1; ACSS2; FMO1; CYP27B1; CYP2F1; PTGS2;
Cytochrome P450 - arranged by substrate type	5	48	1.44509	1.89701	0.12192	1	1	1	CYP2C9; CYP3A5; CYP7A1; CYP27B1; CYP2F1;
Incretin Synthesis, Secretion, and Inactivation	1	21	0.289017	0.873892	0.69581	1	1	1	GATA4;
Synthesis, Secretion, and Inactivation of Glucose-dependent Insulinotropic Polypeptide (GIP)	1	13	0.289017	1.41126	0.521092	1	1	1	GATA4;
Nonsense-Mediated Decay	1	104	0.289017	0.176526	0.997353	1	1	1	RPS4Y1;
Destabilization of mRNA by Butyrate Response Factor 1 (BRF1)	1	20	0.289017	0.917565	0.678043	1	1	1	ZFP36;
Destabilization of mRNA by Tristetraprolin (TTP)	1	17	0.289017	1.07939	0.618292	1	1	1	ZFP36;
Regulation of mRNA Stability by Proteins that Bind AU-rich Elements	1	104	0.289017	0.176526	0.997353	1	1	1	ZFP36;
Deadenylation-dependent mRNA decay	1	46	0.289017	0.399054	0.926631	1	1	1	EIF4A2;
Deadenylation of mRNA	1	22	0.289017	0.834188	0.712599	1	1	1	EIF4A2;
Metabolism of mRNA	3	234	0.867052	0.233827	0.999842	1	1	1	EIF4A2; RPS4Y1; ZFP36;
Metabolism of RNA	3	281	0.867052	0.194719	0.999986	1	1	1	EIF4A2; RPS4Y1; ZFP36;
Metabolism of amino acids and derivatives	5	188	1.44509	0.484417	0.980561	1	1	1	BBOX1; PAH; IDO2; NAGS; ARG2;
Nicotinate metabolism	1	8	0.289017	2.29219	0.364212	1	1	1	NAMPT;
Nicotinamide salvaging	1	2	0.289017	9.13457	0.106998	1	0.944302	1	NAMPT;
Vitamin B5 (pantothenate) metabolism	1	9	0.289017	2.03779	0.39923	1	1	1	FASN;
Nonsense Mediated Decay Enhanced by the Exon Junction Complex	1	104	0.289017	0.176526	0.997353	1	1	1	RPS4Y1;
Nonsense Mediated Decay Independent of the Exon Junction Complex	1	87	0.289017	0.211016	0.992968	1	1	1	RPS4Y1;
Metabolism of vitamins and cofactors	3	47	0.867052	1.16396	0.482576	1	1	1	FASN; SLC2A3; NAMPT;
Metabolism of water-soluble vitamins and cofactors	3	47	0.867052	1.16396	0.482576	1	1	1	FASN; SLC2A3; NAMPT;
Vitamin C (ascorbate) metabolism	1	6	0.289017	3.05499	0.287953	1	1	1	SLC2A3;
Xenobiotics	3	14	0.867052	3.90563	0.0382015	1	0.48614	1	CYP2C9; CYP3A5; CYP2F1;
Glucose transport	1	38	0.289017	0.483043	0.884273	1	1	1	GCK;
Regulation of Glucokinase by Glucokinase Regulatory Protein	1	29	0.289017	0.632902	0.806901	1	1	1	GCK;
Digestion of dietary carbohydrate	1	5	0.289017	3.66477	0.24647	1	1	1	MGAM;
Hexose transport	1	40	0.289017	0.458897	0.896729	1	1	1	GCK;
BMAL1:CLOCK/NPAS2 Activates Gene Expression	3	23	0.867052	2.378	0.129778	1	1	1	BHLHE40; DBP; SERPINE1;
Metabolism of carbohydrates	2	92	0.578035	0.397122	0.966023	1	1	1	MGAM; GCK;
Circadian Clock	3	32	0.867052	1.7094	0.256641	1	1	1	BHLHE40; DBP; SERPINE1;
Fatty Acyl-CoA Biosynthesis	1	18	0.289017	1.01946	0.639346	1	1	1	FASN;
Fatty acid, triacylglycerol, and ketone body metabolism	6	83	1.7341	1.31615	0.305555	1	1	1	DGAT2; FASN; CYP7A1; FADS1; GPAM; GRHL1;
Triglyceride Biosynthesis	3	28	0.867052	1.95351	0.197578	1	1	1	DGAT2; FASN; GPAM;
Lipoprotein metabolism	2	27	0.578035	1.3528	0.44214	1	1	1	CETP; LDLR;
Trafficking of dietary sterols	1	3	0.289017	6.09983	0.156136	1	1	1	ABCG8;
Hormone-sensitive lipase (HSL)-mediated triacylglycerol hydrolysis	1	12	0.289017	1.52877	0.493158	1	1	1	PLIN1;
LDL-mediated lipid transport	2	4	0.578035	9.11201	0.016812	1	0.264551	1	CETP; LDLR;
HDL-mediated lipid transport	1	15	0.289017	1.22322	0.572437	1	1	1	CETP;
Chylomicron-mediated lipid transport	1	16	0.289017	1.14681	0.596013	1	1	1	LDLR;
Cell-cell junction organization	3	45	0.867052	1.21568	0.453704	1	1	1	PRKCI; CDH15; PVR;
Cell-Cell communication	7	117	2.02312	1.08907	0.465882	1	1	1	PRKCI; VASP; WASL; CDH15; LAMC2; PVR; SPTBN1;
Cell junction organization	5	69	1.44509	1.31974	0.329808	1	1	1	PRKCI; VASP; CDH15; LAMC2; PVR;
Transmembrane transport of small molecules	16	378	4.62428	0.769929	0.89456	1	1	1	HMOX1; SLC16A3; SLC11A1; SLC2A3; SLC6A6; SLC33A1; SLC39A8; ABCC6; ABCG8; GCK; SLC12A1; SLC22A7; SLC29A1; ATP1B3; ATP2B4; SLC7A1;
Transport of inorganic cations/anions and amino acids/oligopeptides	3	94	0.867052	0.582043	0.897459	1	1	1	SLC6A6; SLC12A1; SLC7A1;
SLC-mediated transmembrane transport	11	247	3.17919	0.810281	0.808108	1	1	1	SLC16A3; SLC11A1; SLC2A3; SLC6A6; SLC33A1; SLC39A8; GCK; SLC12A1; SLC22A7; SLC29A1; SLC7A1;
ABC-family proteins mediated transport	2	25	0.578035	1.46098	0.403469	1	1	1	ABCC6; ABCG8;
ABCA transporters in lipid homeostasis	1	9	0.289017	2.03779	0.39923	1	1	1	ABCG8;
Cation-coupled Chloride cotransporters	1	7	0.289017	2.61918	0.327159	1	1	1	SLC12A1;
Type I hemidesmosome assembly	1	8	0.289017	2.29219	0.364212	1	1	1	LAMC2;
Adherens junctions interactions	2	27	0.578035	1.3528	0.44214	1	1	1	CDH15; PVR;
Nectin/Necl trans heterodimerization	1	7	0.289017	2.61918	0.327159	1	1	1	PVR;
Tight junction interactions	1	18	0.289017	1.01946	0.639346	1	1	1	PRKCI;
Cell-extracellular matrix interactions	1	16	0.289017	1.14681	0.596013	1	1	1	VASP;
Nephrin interactions	2	29	0.578035	1.25954	0.47939	1	1	1	WASL; SPTBN1;
Zinc transporters	1	17	0.289017	1.07939	0.618292	1	1	1	SLC39A8;
Metal ion SLC transporters	2	25	0.578035	1.46098	0.403469	1	1	1	SLC11A1; SLC39A8;
Proton-coupled monocarboxylate transport	1	4	0.289017	4.57867	0.202577	1	1	1	SLC16A3;
Na+/Cl- dependent neurotransmitter transporters	1	18	0.289017	1.01946	0.639346	1	1	1	SLC6A6;
Zinc influx into cells by the SLC39 gene family	1	10	0.289017	1.83421	0.432324	1	1	1	SLC39A8;
Amino acid transport across the plasma membrane	2	31	0.578035	1.1783	0.51508	1	1	1	SLC6A6; SLC7A1;
Transport of glucose and other sugars, bile salts and organic acids, metal ions and amine compounds	6	94	1.7341	1.16215	0.414938	1	1	1	SLC16A3; SLC11A1; SLC2A3; SLC6A6; SLC39A8; SLC22A7;
Facilitative Na+-independent glucose transporters	1	12	0.289017	1.52877	0.493158	1	1	1	SLC2A3;
Ion channel transport	2	46	0.578035	0.794157	0.728674	1	1	1	ATP1B3; ATP2B4;
Iron uptake and transport	1	37	0.289017	0.496095	0.877495	1	1	1	HMOX1;
Digestion of dietary lipid	1	4	0.289017	4.57867	0.202577	1	1	1	PNLIP;
Lipid digestion, mobilization, and transport	5	46	1.44509	1.97947	0.106426	1	0.944302	1	CETP; PLIN1; ABCG8; LDLR; PNLIP;
Metabolism of lipids and lipoproteins	22	257	6.35838	1.5568	0.025063	1	0.363145	1	ALOX5; CETP; DGAT2; DPEP2; FASN; PLIN1; SGMS2; SRD5A2; ABCB11; CYP7A1; ABCG8; FADS1; GPAM; SPHK2; CH25H; CYP27B1; GRHL1; LDLR; PNLIP; PPAP2B; PTGS2; ZFP36;
Ion transport by P-type ATPases	2	29	0.578035	1.25954	0.47939	1	1	1	ATP1B3; ATP2B4;
Organic cation/anion/zwitterion transport	1	12	0.289017	1.52877	0.493158	1	1	1	SLC22A7;
Organic anion transport	1	5	0.289017	3.66477	0.24647	1	1	1	SLC22A7;
Transport of vitamins, nucleosides, and related molecules	2	30	0.578035	1.21757	0.497437	1	1	1	SLC33A1; SLC29A1;
Transport of nucleosides and free purine and pyrimidine bases across the plasma membrane	1	7	0.289017	2.61918	0.327159	1	1	1	SLC29A1;
PD-1 signaling	1	12	0.289017	1.52877	0.493158	1	1	1	CD274;
Class I MHC mediated antigen processing & presentation	3	101	0.867052	0.541707	0.922528	1	1	1	CANX; SEC61A1; FCGR1A;
CD28 co-stimulation	4	36	1.15607	2.02434	0.133513	1	1	1	MAP3K14; PECAM1; MAP3K8; SPTBN1;
CD28 dependent PI3K/Akt signaling	2	17	0.578035	2.1481	0.239546	1	1	1	MAP3K14; MAP3K8;
CD28 dependent Vav1 pathway	1	18	0.289017	1.01946	0.639346	1	1	1	SPTBN1;
CTLA4 inhibitory signaling	1	5	0.289017	3.66477	0.24647	1	1	1	PECAM1;
Generation of second messenger molecules	1	19	0.289017	0.965833	0.659242	1	1	1	VASP;
Costimulation by the CD28 family	5	52	1.44509	1.75111	0.1558	1	1	1	MAP3K14; PECAM1; CD274; MAP3K8; SPTBN1;
Transcription	3	178	0.867052	0.307386	0.997514	1	1	1	HIST1H3C; HIST1H4B; HIST1H4E;
RNA Polymerase I, RNA Polymerase III, and Mitochondrial Transcription	3	92	0.867052	0.594695	0.889064	1	1	1	HIST1H3C; HIST1H4B; HIST1H4E;
RNA Polymerase I Transcription	3	56	0.867052	0.97693	0.602289	1	1	1	HIST1H3C; HIST1H4B; HIST1H4E;
RNA Polymerase I Promoter Clearance	3	54	0.867052	1.01311	0.577292	1	1	1	HIST1H3C; HIST1H4B; HIST1H4E;
RNA Polymerase I Promoter Opening	3	31	0.867052	1.76452	0.24161	1	1	1	HIST1H3C; HIST1H4B; HIST1H4E;
RNA Polymerase I Chain Elongation	3	48	0.867052	1.13972	0.496739	1	1	1	HIST1H3C; HIST1H4B; HIST1H4E;
Apoptotic cleavage of cellular proteins	2	39	0.578035	0.936662	0.6409	1	1	1	CASP7; LMNB1;
Breakdown of the nuclear lamina	1	4	0.289017	4.57867	0.202577	1	1	1	LMNB1;
SMAC binds to IAPs	1	5	0.289017	3.66477	0.24647	1	1	1	CASP7;
SMAC-mediated apoptotic response	1	5	0.289017	3.66477	0.24647	1	1	1	CASP7;
Apoptotic execution phase	2	48	0.578035	0.761074	0.750171	1	1	1	CASP7; LMNB1;
SMAC-mediated dissociation of IAP:caspase complexes	1	5	0.289017	3.66477	0.24647	1	1	1	CASP7;
Apoptotic factor-mediated response	1	7	0.289017	2.61918	0.327159	1	1	1	CASP7;
Activation of caspases through apoptosome-mediated cleavage	1	5	0.289017	3.66477	0.24647	1	1	1	CASP7;
Cytochrome c-mediated apoptotic response	1	5	0.289017	3.66477	0.24647	1	1	1	CASP7;
Intrinsic Pathway for Apoptosis	2	31	0.578035	1.1783	0.51508	1	1	1	CASP7; PPP3R1;
Activation of BH3-only proteins	1	17	0.289017	1.07939	0.618292	1	1	1	PPP3R1;
Activation of BAD and translocation to mitochondria	1	7	0.289017	2.61918	0.327159	1	1	1	PPP3R1;
Apoptosis	3	158	0.867052	0.346294	0.993625	1	1	1	CASP7; LMNB1; PPP3R1;
Steroid hormones	2	25	0.578035	1.46098	0.403469	1	1	1	SRD5A2; CYP27B1;
Growth hormone receptor signaling	7	18	2.02312	7.07566	2.6941e-05	0.0449376	0.000802457	0.00359922	LYN; PTPN1; SOCS3; CISH; IRS2; SOCS1; SOCS2;
Interleukin-6 signaling	2	8	0.578035	4.56169	0.0677887	1	0.715643	1	SOCS3; IL6;
TRIF mediated TLR3 signaling	5	56	1.44509	1.62605	0.193072	1	1	1	MAP2K3; RPS6KA5; FOS; JUN; NFKB2;
Toll Like Receptor 3 (TLR3) Cascade	5	56	1.44509	1.62605	0.193072	1	1	1	MAP2K3; RPS6KA5; FOS; JUN; NFKB2;
Viral dsRNA:TLR3:TRIF Complex Activates RIP1	1	13	0.289017	1.41126	0.521092	1	1	1	NFKB2;
TRAF6 Mediated Induction of proinflammatory cytokines	5	50	1.44509	1.82114	0.138399	1	1	1	MAP2K3; RPS6KA5; FOS; JUN; NFKB2;
Toll Like Receptor 5 (TLR5) Cascade	5	60	1.44509	1.51767	0.233109	1	1	1	MAP2K3; RPS6KA5; FOS; JUN; NFKB2;
Toll Like Receptor 7/8 (TLR7/8) Cascade	6	62	1.7341	1.76188	0.123966	1	1	1	MAP2K3; RPS6KA5; TLR8; FOS; JUN; NFKB2;
MyD88 dependent cascade initiated on endosome	5	60	1.44509	1.51767	0.233109	1	1	1	MAP2K3; RPS6KA5; FOS; JUN; NFKB2;
TRAF6 mediated induction of NFkB and MAP kinases upon TLR7/8 or 9 activation	5	59	1.44509	1.54339	0.222877	1	1	1	MAP2K3; RPS6KA5; FOS; JUN; NFKB2;
Toll Like Receptor 9 (TLR9) Cascade	5	65	1.44509	1.40094	0.286018	1	1	1	MAP2K3; RPS6KA5; FOS; JUN; NFKB2;
Activated TLR4 signalling	7	72	2.02312	1.76965	0.0994539	1	0.944302	1	MAP2K3; RPS6KA5; SIGIRR; FOS; IRAK3; JUN; NFKB2;
MyD88:Mal cascade initiated on plasma membrane	7	62	2.02312	2.05503	0.0524477	1	0.614935	1	MAP2K3; RPS6KA5; SIGIRR; FOS; IRAK3; JUN; NFKB2;
Toll Like Receptor 4 (TLR4) Cascade	7	76	2.02312	1.67652	0.123138	1	1	1	MAP2K3; RPS6KA5; SIGIRR; FOS; IRAK3; JUN; NFKB2;
NFkB and MAP kinases activation mediated by TLR4 signaling repertoire	5	54	1.44509	1.68627	0.17405	1	1	1	MAP2K3; RPS6KA5; FOS; JUN; NFKB2;
MyD88-independent cascade initiated on plasma membrane	5	58	1.44509	1.56999	0.212787	1	1	1	MAP2K3; RPS6KA5; FOS; JUN; NFKB2;
Innate Immune System	10	183	2.89017	0.99431	0.556034	1	1	1	MAP2K3; RPS6KA5; SIGIRR; TLR1; TLR2; TLR8; FOS; IRAK3; JUN; NFKB2;
Toll Receptor Cascades	10	90	2.89017	2.02165	0.0252547	1	0.363145	1	MAP2K3; RPS6KA5; SIGIRR; TLR1; TLR2; TLR8; FOS; IRAK3; JUN; NFKB2;
Cross-presentation of soluble exogenous antigens (endosomes)	1	67	0.289017	0.273996	0.977883	1	1	1	FCGR1A;
Immunoregulatory interactions between a Lymphoid and a non-Lymphoid cell	4	52	1.15607	1.40159	0.320386	1	1	1	ITGB2; SELL; CD160; PVR;
Antigen Presentation: Folding, assembly and peptide loading of class I MHC	1	23	0.289017	0.797935	0.728463	1	1	1	CANX;
Antigen processing-Cross presentation	2	86	0.578035	0.424825	0.954731	1	1	1	SEC61A1; FCGR1A;
ER-Phagosome pathway	1	80	0.289017	0.229477	0.989494	1	1	1	SEC61A1;
Toll Like Receptor 10 (TLR10) Cascade	5	60	1.44509	1.51767	0.233109	1	1	1	MAP2K3; RPS6KA5; FOS; JUN; NFKB2;
Activation of the AP-1 family of transcription factors	2	9	0.578035	4.0554	0.0840679	1	0.829736	1	FOS; JUN;
activated TAK1 mediates p38 MAPK activation	1	6	0.289017	3.05499	0.287953	1	1	1	MAP2K3;
MAPK targets/ Nuclear events mediated by MAP kinases	3	21	0.867052	2.60437	0.105461	1	0.944302	1	RPS6KA5; FOS; JUN;
MAP kinase activation in TLR cascade	4	30	1.15607	2.42908	0.0798469	1	0.802317	1	MAP2K3; RPS6KA5; FOS; JUN;
JNK (c-Jun kinases) phosphorylation and activation mediated by activated human TAK1	1	7	0.289017	2.61918	0.327159	1	1	1	MAP2K3;
TAK1 activates NFkB by phosphorylation and activation of IKKs complex	2	11	0.578035	3.31873	0.11956	1	1	1	MAP2K3; NFKB2;
MyD88 cascade initiated on plasma membrane	5	59	1.44509	1.54339	0.222877	1	1	1	MAP2K3; RPS6KA5; FOS; JUN; NFKB2;
RIG-I/MDA5 mediated induction of IFN-alpha/beta pathways	1	67	0.289017	0.273996	0.977883	1	1	1	NFKB2;
TRAF6 mediated NF-kB activation	1	13	0.289017	1.41126	0.521092	1	1	1	NFKB2;
Cytokine Signaling in Immune system	24	193	6.93642	2.26139	0.000131792	0.219829	0.00354564	0.0159031	CD44; CSF2RB; ICAM1; IL1R2; IL1RN; IRF1; MAP2K3; LYN; MX2; PTPN1; SOCS3; IFIT2; CISH; EGR1; FCGR1A; IL1B; IL2RA; IL6; IRAK3; IRS2; MAP3K8; NFKB2; SOCS1; SOCS2;
Interferon alpha/beta signaling	7	77	2.02312	1.65475	0.129474	1	1	1	IRF1; MX2; PTPN1; SOCS3; IFIT2; EGR1; SOCS1;
Interferon Signaling	10	98	2.89017	1.85663	0.042144	1	0.520712	1	CD44; ICAM1; IRF1; MX2; PTPN1; SOCS3; IFIT2; EGR1; FCGR1A; SOCS1;
Interferon gamma signaling	7	47	2.02312	2.71076	0.0134547	1	0.222203	0.996637	CD44; ICAM1; IRF1; PTPN1; SOCS3; FCGR1A; SOCS1;
Regulation of IFNG signaling	3	13	0.867052	4.20583	0.031258	1	0.413797	1	PTPN1; SOCS3; SOCS1;
Regulation of IFNA signaling	3	38	0.867052	1.43957	0.348409	1	1	1	PTPN1; SOCS3; SOCS1;
Interleukin-1 signaling	6	39	1.7341	2.80067	0.018562	1	0.286679	1	IL1R2; IL1RN; MAP2K3; IL1B; IRAK3; MAP3K8;
Interleukin-2 signaling	1	28	0.289017	0.655497	0.795608	1	1	1	IL2RA;
Signaling by Interleukins	11	92	3.17919	2.17528	0.0116594	1	0.196443	0.881097	CSF2RB; IL1R2; IL1RN; MAP2K3; SOCS3; IL1B; IL2RA; IL6; IRAK3; MAP3K8; NFKB2;
Interleukin-1 processing	2	6	0.578035	6.07973	0.0390544	1	0.48614	1	IL1B; NFKB2;
Interleukin-3, 5 and GM-CSF signaling	1	29	0.289017	0.632902	0.806901	1	1	1	CSF2RB;
Toll Like Receptor 2 (TLR2) Cascade	9	65	2.60116	2.51946	0.00865292	1	0.155056	0.695467	MAP2K3; RPS6KA5; SIGIRR; TLR1; TLR2; FOS; IRAK3; JUN; NFKB2;
Toll Like Receptor TLR1:TLR2 Cascade	9	64	2.60116	2.55882	0.0078221	1	0.14497	0.650225	MAP2K3; RPS6KA5; SIGIRR; TLR1; TLR2; FOS; IRAK3; JUN; NFKB2;
Toll Like Receptor TLR6:TLR2 Cascade	8	64	2.31214	2.27482	0.023126	1	0.338369	1	MAP2K3; RPS6KA5; SIGIRR; TLR2; FOS; IRAK3; JUN; NFKB2;
Nucleotide-binding domain, leucine rich repeat containing receptor (NLR) signaling pathways	2	43	0.578035	0.849551	0.693514	1	1	1	MAP2K3; NFKB2;
NOD1/2 Signaling Pathway	1	26	0.289017	0.705901	0.771007	1	1	1	MAP2K3;
Inflammasomes	1	17	0.289017	1.07939	0.618292	1	1	1	NFKB2;
citrulline biosynthesis	1	8	0.289017	2.29219	0.364212	1	1	1	ARG2;
protein citrullination	1	5	0.289017	3.66477	0.24647	1	1	1	PADI4;
arginine degradation VI (arginase 2 pathway)	1	6	0.289017	3.05499	0.287953	1	1	1	ARG2;
tyrosine biosynthesis IV	1	1	0.289017	18.1787	0.0550079	1	0.623071	1	PAH;
arginine degradation I (arginase pathway)	1	4	0.289017	4.57867	0.202577	1	1	1	ARG2;
GDP-glucose biosynthesis	1	4	0.289017	4.57867	0.202577	1	1	1	GCK;
chondroitin sulfate biosynthesis	1	20	0.289017	0.917565	0.678043	1	1	1	CHSY3;
dermatan sulfate biosynthesis	1	17	0.289017	1.07939	0.618292	1	1	1	CHSY3;
chondroitin and dermatan biosynthesis	1	6	0.289017	3.05499	0.287953	1	1	1	CHSY3;
chondroitin sulfate biosynthesis (late stages)	1	12	0.289017	1.52877	0.493158	1	1	1	CHSY3;
NAD biosynthesis III	1	4	0.289017	4.57867	0.202577	1	1	1	NAMPT;
heme biosynthesis II	1	9	0.289017	2.03779	0.39923	1	1	1	CPOX;
heme biosynthesis from uroporphyrinogen-III I	1	4	0.289017	4.57867	0.202577	1	1	1	CPOX;
1,25-dihydroxyvitamin D3 biosynthesis	1	1	0.289017	18.1787	0.0550079	1	0.623071	1	CYP27B1;
tetrahydrofolate salvage from 5,10-methenyltetrahydrofolate	1	4	0.289017	4.57867	0.202577	1	1	1	MTHFD2;
folate transformations	1	9	0.289017	2.03779	0.39923	1	1	1	MTHFD2;
prostanoid biosynthesis	1	9	0.289017	2.03779	0.39923	1	1	1	PTGS2;
leukotriene biosynthesis	2	6	0.578035	6.07973	0.0390544	1	0.48614	1	ALOX5; DPEP2;
androgen biosynthesis	1	8	0.289017	2.29219	0.364212	1	1	1	SRD5A2;
sphingomyelin metabolism	1	7	0.289017	2.61918	0.327159	1	1	1	SGMS2;
triacylglycerol biosynthesis	5	24	1.44509	3.79322	0.00873819	1	0.155056	0.695467	DGAT2; GPAM; MOGAT1; AGPAT9; PPAP2B;
fatty acid biosynthesis initiation II	1	2	0.289017	9.13457	0.106998	1	0.944302	1	FASN;
oleate biosynthesis II (animals)	2	7	0.578035	5.21244	0.0527193	1	0.614935	1	FADS2; FADS1;
palmitate biosynthesis I (animals)	1	2	0.289017	9.13457	0.106998	1	0.944302	1	FASN;
CDP-diacylglycerol biosynthesis I	2	15	0.578035	2.43432	0.19823	1	1	1	GPAM; AGPAT9;
phosphatidylethanolamine biosynthesis II	1	6	0.289017	3.05499	0.287953	1	1	1	ETNK1;
phosphatidylglycerol biosynthesis II (non-plastidic)	2	16	0.578035	2.28227	0.218804	1	1	1	GPAM; AGPAT9;
bile acid biosynthesis, neutral pathway	1	9	0.289017	2.03779	0.39923	1	1	1	CYP7A1;
L-carnitine biosynthesis	1	3	0.289017	6.09983	0.156136	1	1	1	BBOX1;
purine nucleotides de novo biosynthesis II	1	11	0.289017	1.66762	0.4636	1	1	1	ADSSL1;
histamine biosynthesis	1	1	0.289017	18.1787	0.0550079	1	0.623071	1	HDC;
UDP-N-acetyl-D-glucosamine biosynthesis II	1	5	0.289017	3.66477	0.24647	1	1	1	GFPT2;
superpathway of D-myo-inositol (1,4,5)-trisphosphate metabolism	1	20	0.289017	0.917565	0.678043	1	1	1	ITPKC;
D-myo-inositol (1,3,4)-trisphosphate biosynthesis	1	15	0.289017	1.22322	0.572437	1	1	1	ITPKC;
1D-myo-inositol hexakisphosphate biosynthesis II (mammalian)	1	15	0.289017	1.22322	0.572437	1	1	1	ITPKC;
oxidative ethanol degradation III (microsomal)	1	6	0.289017	3.05499	0.287953	1	1	1	ACSS2;
ethanol degradation IV (peroxisomal)	1	7	0.289017	2.61918	0.327159	1	1	1	ACSS2;
ethanol degradation II (cytosol)	1	6	0.289017	3.05499	0.287953	1	1	1	ACSS2;
glutamate degradation III (via 4-aminobutyrate)	1	4	0.289017	4.57867	0.202577	1	1	1	GAD2;
histidine degradation III	1	7	0.289017	2.61918	0.327159	1	1	1	MTHFD2;
phenylalanine degradation I (aerobic)	1	4	0.289017	4.57867	0.202577	1	1	1	PAH;
acetate conversion to acetyl-CoA	1	3	0.289017	6.09983	0.156136	1	1	1	ACSS2;
heme degradation	1	4	0.289017	4.57867	0.202577	1	1	1	HMOX1;
glucose and glucose-1-phosphate degradation	1	4	0.289017	4.57867	0.202577	1	1	1	GCK;
sucrose degradation	1	7	0.289017	2.61918	0.327159	1	1	1	ALDOA;
trehalose degradation II (trehalase)	1	2	0.289017	9.13457	0.106998	1	0.944302	1	GCK;
triacylglycerol degradation	1	14	0.289017	1.31053	0.54749	1	1	1	PNLIP;
purine nucleotides degradation II (aerobic)	1	12	0.289017	1.52877	0.493158	1	1	1	NT5E;
adenosine nucleotides degradation II	1	9	0.289017	2.03779	0.39923	1	1	1	NT5E;
urea cycle	1	6	0.289017	3.05499	0.287953	1	1	1	ARG2;
glutathione-mediated detoxification	1	19	0.289017	0.965833	0.659242	1	1	1	GSTT1;
nicotine degradation II	1	11	0.289017	1.66762	0.4636	1	1	1	FMO1;
superoxide radicals degradation	1	5	0.289017	3.66477	0.24647	1	1	1	SOD2;
glutamate dependent acid resistance	1	2	0.289017	9.13457	0.106998	1	0.944302	1	GAD2;
Validated transcriptional targets of TAp63 isoforms	6	54	1.7341	2.02285	0.0744038	1	0.77566	1	SP1; TRAF4; GDF15; OGG1; TP53I3; CDKN1A;
S1P5 pathway	1	8	0.289017	2.29219	0.364212	1	1	1	GNAO1;
Wnt signaling network	15	200	4.33526	1.36424	0.136261	1	1	1	CMTM2; MMP9; NFATC2; NRIP1; MYC; BRCA1; PRKCZ; WNT5A; CYR61; FZD7; JUN; KLF4; TMPRSS2; TNIK; VCAN;
Beta2 integrin cell surface interactions	6	28	1.7341	3.90053	0.0035612	1	0.0707152	0.317175	FCGR2A; ICAM1; ITGAM; ITGB2; PLAUR; CYR61;
CXCR3-mediated signaling events	3	37	0.867052	1.47846	0.333062	1	1	1	ITGB2; MAP2K3; GNAO1;
LPA4-mediated signaling events	1	16	0.289017	1.14681	0.596013	1	1	1	RPS6KA5;
Osteopontin-mediated events	5	29	1.44509	3.13944	0.0195035	1	0.291378	1	CD44; MAP3K14; MMP9; FOS; JUN;
Regulation of cytoplasmic and nuclear SMAD2/3 signaling	35	305	10.1156	2.08661	2.21633e-05	0.0369684	0.000672153	0.00301478	FGR; FOSL1; HCK; KRT8; MAP2K3; LSP1; LYN; NFATC2; PIM1; PPP1R15A; PTPN1; RPS6KA5; SIN3A; SP1; COL1A2; MAF; MYC; FOS; PRKCZ; ATF3; CDKN1A; EGR1; EGR3; FOXO1; GADD45B; GADD45G; IL2RA; JUN; JUNB; MAP3K8; NR4A1; PTGS2; RUNX1; SERPINE1; SPTBN1;
IL2 signaling events mediated by STAT5	3	28	0.867052	1.95351	0.197578	1	1	1	SP1; MYC; IL2RA;
ErbB2/ErbB3 signaling events	5	38	1.44509	2.39609	0.0552845	1	0.623071	1	ERBB2; STAT3; FOS; JUN; NRG1;
Validated targets of C-MYC transcriptional repression	10	63	2.89017	2.88793	0.00208797	1	0.0435342	0.195262	ERBB2; SLC11A1; SP1; COL1A2; MYC; BRCA1; CEBPA; WNT5A; CDKN1A; CEBPD;
IL6-mediated signaling events	13	47	3.75723	5.03095	8.62686e-07	0.00143896	3.12818e-05	0.000140306	HCK; IRF1; PTPRE; SOCS3; STAT3; HSP90B1; MYC; FOS; CEBPD; FOXO1; IL6; JUN; JUNB;
Signaling events mediated by the Hedgehog family	2	65	0.578035	0.562055	0.880355	1	1	1	SIN3A; GNAO1;
EphrinA-EPHA pathway	5	43	1.44509	2.11754	0.0851546	1	0.835517	1	FGR; HCK; LYN; EPHA1; EPHA2;
Circadian rhythm pathway	1	16	0.289017	1.14681	0.596013	1	1	1	BHLHE40;
Canonical NF-kappaB pathway	4	35	1.15607	2.08216	0.123718	1	1	1	MAP3K14; BCL3; RELB; NFKB2;
Signaling events mediated by HDAC Class I	11	113	3.17919	1.77106	0.0456304	1	0.551532	1	BCL6; GATAD2A; MXD1; SIN3A; STAT3; ACSS2; HIST1H1E; HIST1H4B; HIST1H4E; CDKN1A; FOXO1;
EPHA forward signaling	5	31	1.44509	2.93696	0.0255207	1	0.363833	1	FGR; HCK; LYN; EPHA1; EPHA2;
Integrins in angiogenesis	5	64	1.44509	1.42283	0.275239	1	1	1	CD44; MAP3K14; MMP9; FOS; JUN;
Syndecan-1-mediated signaling events	110	1297	31.7919	1.54188	3.37953e-07	0.000563706	1.31094e-05	5.87991e-05	ADRB2; ALDOA; BCL2A1; BCL6; BHLHE40; CMTM2; ERBB2; FGR; FOSL1; FOSL2; FPR1; FPR2; HCK; HMGA1; HMOX1; ICAM1; IRF1; ITGAM; ITGB2; JUND; KRT8; SOD2; MAP2K3; LSP1; LYN; MAP3K14; BCL3; MMP9; NFATC2; NRIP1; PEG10; PIM1; PLAUR; PPP1R15A; PRKCI; PTPN1; PTPRE; RALGDS; RELB; RPS6KA5; SIN3A; SLA; SLC11A1; SOCS3; SP1; STAT3; TGFB1; TNFRSF10C; VASP; WASL; ZYX; COL1A2; HSP90B1; LMAN1; LPP; MAF; NT5E; MEP1B; MY…
Downstream signaling in na&#xef;ve CD8+ T cells	7	65	2.02312	1.9602	0.0646898	1	0.691683	1	FOSL1; NFATC2; FOS; EGR1; IL2RA; JUN; JUNB;
Regulation of CDC42 activity	78	768	22.5434	1.84649	2.21169e-08	3.6891e-05	6.93032e-06	3.10842e-05	ALDOA; BHLHE40; CDC42BPA; CMTM2; DNMBP; FGR; FOSL1; FOSL2; HCK; HMOX1; ICAM1; IRF1; ITGB2; JUND; KRT8; MAP2K3; LSP1; LYN; MMP9; NCF1; NCF2; NFATC2; NRIP1; PIM1; PLAUR; PPP1R15A; PTPN1; PTPRE; RPS6KA5; SIN3A; SOCS3; SP1; STAT3; TGFB1; WASL; COL1A2; HSP90B1; MAF; NT5E; RAP1GDS1; MYC; IGFBP1; FOSB; FOS; AFP; BRCA1; GCK; PRKCZ; ATF3; CCL2; CDKN1A; CEBPD; CIT; CXCR4; CYR61; EGR1; EGR3; FOXO1; GADD45B;…
Notch-mediated HES/HEY network	4	94	1.15607	0.775413	0.768252	1	1	1	GATA4; STAT3; MYC; CDKN1A;
p38 signaling mediated by MAPKAP kinases	1	21	0.289017	0.873892	0.69581	1	1	1	LSP1;
Glypican pathway	114	1335	32.948	1.55246	1.22819e-07	0.000204863	1.01767e-05	4.56451e-05	ADRB2; ALDOA; BCL2A1; BCL6; BHLHE40; CMTM2; ERBB2; FGR; FLT1; FOSL1; FOSL2; FPR1; FPR2; HCK; HMGA1; HMOX1; ICAM1; IRF1; ITGAM; ITGB2; JUND; KRT8; SOD2; MAP2K3; LSP1; LYN; MAP3K14; BCL3; MMP9; NFATC2; NRIP1; PEG10; PIM1; PLAUR; PPP1R15A; PRKCI; PTPN1; PTPRE; RALGDS; RELB; RPS6KA5; SIN3A; SLA; SLC11A1; SOCS3; SP1; STAT3; TGFB1; TNFRSF10C; VASP; WASL; ZYX; COL1A2; HSP90B1; LMAN1; LPP; MAF; NT5E; MEP…
GMCSF-mediated signaling events	112	1289	32.3699	1.57966	6.41848e-08	0.00010706	9.62475e-06	4.31694e-05	ADRB2; ALDOA; BCL2A1; BCL6; BHLHE40; CMTM2; CSF2RB; ERBB2; FGR; FOSL1; FOSL2; FPR1; FPR2; HCK; HMGA1; HMOX1; ICAM1; IRF1; ITGAM; ITGB2; JUND; KRT8; SOD2; MAP2K3; LSP1; LYN; MAP3K14; BCL3; MMP9; NFATC2; NRIP1; PEG10; PIM1; PLAUR; PPP1R15A; PRKCI; PTPN1; PTPRE; RALGDS; RELB; RPS6KA5; SIN3A; SLA; SLC11A1; SOCS3; SP1; STAT3; TGFB1; TNFRSF10C; VASP; WASL; ZYX; COL1A2; HSP90B1; LMAN1; LPP; MAF; NT5E; M…
Validated transcriptional targets of deltaNp63 isoforms	5	64	1.44509	1.42283	0.275239	1	1	1	FASN; FOSL2; CEBPD; NRG1; RUNX1;
IL27-mediated signaling events	4	26	1.15607	2.80264	0.0516033	1	0.614816	1	STAT3; TGFB1; IL1B; IL6;
Insulin Pathway	110	1285	31.7919	1.55628	2.04712e-07	0.00034146	1.01767e-05	4.56451e-05	ADRB2; ALDOA; BCL2A1; BCL6; BHLHE40; CMTM2; ERBB2; FGR; FOSL1; FOSL2; FPR1; FPR2; HCK; HMGA1; HMOX1; ICAM1; IRF1; ITGAM; ITGB2; JUND; KRT8; SOD2; MAP2K3; LSP1; LYN; MAP3K14; BCL3; MMP9; NFATC2; NRIP1; PEG10; PIM1; PLAUR; PPP1R15A; PRKCI; PTPN1; PTPRE; RALGDS; RELB; RPS6KA5; SIN3A; SLA; SLC11A1; SOCS3; SP1; STAT3; TGFB1; TNFRSF10C; VASP; WASL; ZYX; COL1A2; HSP90B1; LMAN1; LPP; MAF; NT5E; MEP1B; MY…
C-MYC pathway	17	149	4.91329	2.07516	0.0031906	1	0.0649015	0.2911	ERBB2; FOSL1; HMGA1; MMP9; PEG10; PIM1; SLC11A1; SP1; COL1A2; MYC; BRCA1; CEBPA; GPAM; WNT5A; CDKN1A; CEBPD; LIN28B;
Signaling events mediated by HDAC Class II	1	38	0.289017	0.483043	0.884273	1	1	1	BCL6;
Stabilization and expansion of the E-cadherin adherens junction	19	275	5.49133	1.2566	0.178868	1	1	1	CMTM2; MMP9; NRIP1; PLAUR; PTPN1; VASP; ZYX; LPP; MEP1B; MYC; FOS; BRCA1; CYR61; EPHA2; JUN; KLF4; TMPRSS2; TNIK; VCAN;
FOXA transcription factor networks	12	81	3.46821	2.69505	0.00143821	1	0.0319858	0.143464	NRIP1; PKLR; SP1; IGFBP1; FOS; AFP; BRCA1; CEBPA; GCK; CEBPD; JUN; SERPINA1;
Glypican 3 network	15	206	4.33526	1.32451	0.161499	1	1	1	CMTM2; MMP9; NFATC2; NRIP1; MYC; BRCA1; PRKCZ; WNT5A; CYR61; FZD7; JUN; KLF4; TMPRSS2; TNIK; VCAN;
Nectin adhesion pathway	111	1292	32.0809	1.56192	1.42782e-07	0.00023816	1.01767e-05	4.56451e-05	ADRB2; ALDOA; BCL2A1; BCL6; BHLHE40; CMTM2; ERBB2; FGR; FOSL1; FOSL2; FPR1; FPR2; HCK; HMGA1; HMOX1; ICAM1; IRF1; ITGAM; ITGB2; JUND; KRT8; SOD2; MAP2K3; LSP1; LYN; MAP3K14; BCL3; MMP9; NFATC2; NRIP1; PEG10; PIM1; PLAUR; PPP1R15A; PRKCI; PTPN1; PTPRE; RALGDS; RELB; RPS6KA5; SIN3A; SLA; SLC11A1; SOCS3; SP1; STAT3; TGFB1; TNFRSF10C; VASP; WASL; ZYX; COL1A2; HSP90B1; LMAN1; LPP; MAF; NT5E; MEP1B; MY…
FGF signaling pathway	4	48	1.15607	1.51836	0.270129	1	1	1	MMP9; PLAUR; FOS; JUN;
Neurotrophic factor-mediated Trk receptor signaling	7	101	2.02312	1.26158	0.320036	1	1	1	MAP2K3; PRKCI; RPS6KA5; STAT3; FOS; PRKCZ; EGR1;
Nephrin/Neph1 signaling in the kidney podocyte	4	25	1.15607	2.9147	0.0455657	1	0.551532	1	PRKCI; WASL; PRKCZ; JUN;
Aurora B signaling	1	41	0.289017	0.447707	0.902446	1	1	1	CBX5;
CD40/CD40L signaling	8	58	2.31214	2.51011	0.0133011	1	0.221863	0.995111	BIRC3; FCAMR; MAP3K14; BCL3; RELB; MYC; JUN; NFKB2;
TRAIL signaling pathway	115	1325	33.237	1.5779	4.07705e-08	6.80051e-05	8.20324e-06	3.67936e-05	ADRB2; ALDOA; BCL2A1; BCL6; BHLHE40; BIRC3; CASP7; CMTM2; ERBB2; FGR; FOSL1; FOSL2; FPR1; FPR2; HCK; HMGA1; HMOX1; ICAM1; IRF1; ITGAM; ITGB2; JUND; KRT8; LMNB1; SOD2; MAP2K3; LSP1; LYN; MAP3K14; BCL3; MMP9; NFATC2; NRIP1; PEG10; PIM1; PLAUR; PPP1R15A; PRKCI; PTPN1; PTPRE; RALGDS; RELB; RPS6KA5; SIN3A; SLA; SLC11A1; SOCS3; SP1; STAT3; TGFB1; TNFRSF10C; VASP; WASL; ZYX; COL1A2; HSP90B1; LMAN1; LPP;…
LPA receptor mediated events	12	100	3.46821	2.18304	0.00837334	1	0.151812	0.680916	LYN; MAP3K14; BCL3; MMP9; RELB; RPS6KA5; FOS; GNAO1; HBEGF; IL6; JUN; NFKB2;
IGF1 pathway	110	1288	31.7919	1.55266	2.32297e-07	0.000387472	1.07631e-05	4.82753e-05	ADRB2; ALDOA; BCL2A1; BCL6; BHLHE40; CMTM2; ERBB2; FGR; FOSL1; FOSL2; FPR1; FPR2; HCK; HMGA1; HMOX1; ICAM1; IRF1; ITGAM; ITGB2; JUND; KRT8; SOD2; MAP2K3; LSP1; LYN; MAP3K14; BCL3; MMP9; NFATC2; NRIP1; PEG10; PIM1; PLAUR; PPP1R15A; PRKCI; PTPN1; PTPRE; RALGDS; RELB; RPS6KA5; SIN3A; SLA; SLC11A1; SOCS3; SP1; STAT3; TGFB1; TNFRSF10C; VASP; WASL; ZYX; COL1A2; HSP90B1; LMAN1; LPP; MAF; NT5E; MEP1B; MY…
PLK1 signaling events	6	104	1.7341	1.05042	0.512877	1	1	1	MAP3K14; BCL3; RELB; BRCA1; NINL; NFKB2;
Lissencephaly gene (LIS1) in neuronal migration and development	1	31	0.289017	0.592083	0.827655	1	1	1	MAP1B;
ATF-2 transcription factor network	8	59	2.31214	2.46757	0.0146752	1	0.239983	1	JUND; SOCS3; FOS; BRCA1; ATF3; IL6; JUN; JUNB;
HIF-1-alpha transcription factor network	13	66	3.75723	3.58286	4.83509e-05	0.0806493	0.00139051	0.00623677	ALDOA; BHLHE40; HMOX1; ITGB2; SP1; NT5E; IGFBP1; FOS; GCK; CXCR4; JUN; PFKFB3; SERPINE1;
CDC42 signaling events	77	755	22.2543	1.8542	2.32841e-08	3.88379e-05	6.93032e-06	3.10842e-05	ALDOA; BHLHE40; CDC42BPA; CMTM2; FGR; FOSL1; FOSL2; HCK; HMOX1; ICAM1; IRF1; ITGB2; JUND; KRT8; MAP2K3; LSP1; LYN; MMP9; NCF1; NCF2; NFATC2; NRIP1; PIM1; PLAUR; PPP1R15A; PTPN1; PTPRE; RPS6KA5; SIN3A; SOCS3; SP1; STAT3; TGFB1; WASL; COL1A2; HSP90B1; MAF; NT5E; RAP1GDS1; MYC; IGFBP1; FOSB; FOS; AFP; BRCA1; GCK; PRKCZ; ATF3; CCL2; CDKN1A; CEBPD; CIT; CXCR4; CYR61; EGR1; EGR3; FOXO1; GADD45B; GADD45…
Signaling events mediated by Hepatocyte Growth Factor Receptor (c-Met)	110	1290	31.7919	1.55025	2.52621e-07	0.000421372	1.08044e-05	4.84604e-05	ADRB2; ALDOA; BCL2A1; BCL6; BHLHE40; CMTM2; ERBB2; FGR; FOSL1; FOSL2; FPR1; FPR2; HCK; HMGA1; HMOX1; ICAM1; IRF1; ITGAM; ITGB2; JUND; KRT8; SOD2; MAP2K3; LSP1; LYN; MAP3K14; BCL3; MMP9; NFATC2; NRIP1; PEG10; PIM1; PLAUR; PPP1R15A; PRKCI; PTPN1; PTPRE; RALGDS; RELB; RPS6KA5; SIN3A; SLA; SLC11A1; SOCS3; SP1; STAT3; TGFB1; TNFRSF10C; VASP; WASL; ZYX; COL1A2; HSP90B1; LMAN1; LPP; MAF; NT5E; MEP1B; MY…
Glypican 1 network	113	1296	32.659	1.58515	4.42621e-08	7.38291e-05	8.20324e-06	3.67936e-05	ADRB2; ALDOA; BCL2A1; BCL6; BHLHE40; CMTM2; ERBB2; FGR; FLT1; FOSL1; FOSL2; FPR1; FPR2; HCK; HMGA1; HMOX1; ICAM1; IRF1; ITGAM; ITGB2; JUND; KRT8; SOD2; MAP2K3; LSP1; LYN; MAP3K14; BCL3; MMP9; NFATC2; NRIP1; PEG10; PIM1; PLAUR; PPP1R15A; PRKCI; PTPN1; PTPRE; RALGDS; RELB; RPS6KA5; SIN3A; SLA; SLC11A1; SOCS3; SP1; STAT3; TGFB1; TNFRSF10C; VASP; WASL; ZYX; COL1A2; HSP90B1; LMAN1; LPP; MAF; NT5E; MEP…
Validated targets of C-MYC transcriptional activation	8	81	2.31214	1.79745	0.0758762	1	0.781244	1	FOSL1; HMGA1; MMP9; PEG10; PIM1; MYC; GPAM; LIN28B;
N-cadherin signaling events	15	251	4.33526	1.08706	0.407932	1	1	1	CMTM2; MMP9; NRIP1; PLAUR; PTPN1; MEP1B; MYC; FOS; BRCA1; CYR61; JUN; KLF4; TMPRSS2; TNIK; VCAN;
VEGFR3 signaling in lymphatic endothelium	1	25	0.289017	0.734126	0.757621	1	1	1	COL1A2;
Fc-epsilon receptor I signaling in mast cells	5	61	1.44509	1.49279	0.243472	1	1	1	FCER1G; LYN; NFATC2; FOS; JUN;
PDGF receptor signaling network	110	1290	31.7919	1.55025	2.52621e-07	0.000421372	1.08044e-05	4.84604e-05	ADRB2; ALDOA; BCL2A1; BCL6; BHLHE40; CMTM2; ERBB2; FGR; FOSL1; FOSL2; FPR1; FPR2; HCK; HMGA1; HMOX1; ICAM1; IRF1; ITGAM; ITGB2; JUND; KRT8; SOD2; MAP2K3; LSP1; LYN; MAP3K14; BCL3; MMP9; NFATC2; NRIP1; PEG10; PIM1; PLAUR; PPP1R15A; PRKCI; PTPN1; PTPRE; RALGDS; RELB; RPS6KA5; SIN3A; SLA; SLC11A1; SOCS3; SP1; STAT3; TGFB1; TNFRSF10C; VASP; WASL; ZYX; COL1A2; HSP90B1; LMAN1; LPP; MAF; NT5E; MEP1B; MY…
EphrinB-EPHB pathway	5	60	1.44509	1.51767	0.233109	1	1	1	FGR; HCK; LYN; WASL; CXCR4;
Integrin family cell surface interactions	121	1375	34.9711	1.59985	5.92856e-09	9.88884e-06	3.86759e-06	1.73471e-05	ADRB2; ALDOA; BCL2A1; BCL6; BHLHE40; CMTM2; CSF2RB; ERBB2; FCGR2A; FGR; FOSL1; FOSL2; FPR1; FPR2; HCK; HMGA1; HMOX1; ICAM1; IRF1; ITGAM; ITGB2; JUND; KCNJ15; KRT8; SOD2; MAP2K3; LSP1; LYN; MAP3K14; BCL3; MMP9; NFATC2; NRIP1; PECAM1; PEG10; PIM1; PLAUR; PPP1R15A; PRKCI; PTPN1; PTPRE; RALGDS; RELB; RPS6KA5; SDC4; SIN3A; SLA; SLC11A1; SOCS3; SP1; STAT3; TGFB1; TNFRSF10C; VASP; WASL; ZYX; COL1A2; HSP…
IL1-mediated signaling events	33	234	9.53757	2.56433	4.10552e-07	0.000684801	1.55637e-05	6.98069e-05	FGR; FOSL1; HCK; IL1R2; IL1RN; KRT8; MAP2K3; LSP1; LYN; MAP3K14; BCL3; NFATC2; PIM1; PRKCI; PTPN1; RELB; RPS6KA5; MAF; FOS; PRKCZ; EGR1; EGR3; GADD45B; GADD45G; IL1B; IL2RA; IRAK3; JUN; JUNB; MAP3K8; NFKB2; NR4A1; PTGS2;
Caspase cascade in apoptosis	4	52	1.15607	1.40159	0.320386	1	1	1	BIRC3; CASP7; LMNB1; CASP4;
Calcineurin-regulated NFAT-dependent transcription in lymphocytes	11	49	3.17919	4.08381	5.24246e-05	0.0874442	0.0014821	0.00664761	FOSL1; NFATC2; PTPN1; MAF; FOS; EGR1; EGR3; IL2RA; JUN; JUNB; PTGS2;
Fanconi anemia pathway	2	48	0.578035	0.761074	0.750171	1	1	1	FANCL; BRCA1;
S1P2 pathway	3	26	0.867052	2.10372	0.169441	1	1	1	FOS; GNAO1; JUN;
BARD1 signaling events	2	29	0.578035	1.25954	0.47939	1	1	1	FANCL; BRCA1;
Coregulation of Androgen receptor activity	4	61	1.15607	1.19483	0.434404	1	1	1	CMTM2; NRIP1; BRCA1; TMPRSS2;
Regulation of Telomerase	9	68	2.60116	2.40832	0.0115496	1	0.196443	0.881097	IRF1; MXD1; SIN3A; SP1; TGFB1; MYC; FOS; JUN; WT1;
Cellular roles of Anthrax toxin	4	22	1.15607	3.31197	0.0299606	1	0.409626	1	DEFA1B; DEFA1; MAP2K3; IL1B;
Internalization of ErbB1	110	1285	31.7919	1.55628	2.04712e-07	0.00034146	1.01767e-05	4.56451e-05	ADRB2; ALDOA; BCL2A1; BCL6; BHLHE40; CMTM2; ERBB2; FGR; FOSL1; FOSL2; FPR1; FPR2; HCK; HMGA1; HMOX1; ICAM1; IRF1; ITGAM; ITGB2; JUND; KRT8; SOD2; MAP2K3; LSP1; LYN; MAP3K14; BCL3; MMP9; NFATC2; NRIP1; PEG10; PIM1; PLAUR; PPP1R15A; PRKCI; PTPN1; PTPRE; RALGDS; RELB; RPS6KA5; SIN3A; SLA; SLC11A1; SOCS3; SP1; STAT3; TGFB1; TNFRSF10C; VASP; WASL; ZYX; COL1A2; HSP90B1; LMAN1; LPP; MAF; NT5E; MEP1B; MY…
TGF-beta receptor signaling	35	305	10.1156	2.08661	2.21633e-05	0.0369684	0.000672153	0.00301478	FGR; FOSL1; HCK; KRT8; MAP2K3; LSP1; LYN; NFATC2; PIM1; PPP1R15A; PTPN1; RPS6KA5; SIN3A; SP1; COL1A2; MAF; MYC; FOS; PRKCZ; ATF3; CDKN1A; EGR1; EGR3; FOXO1; GADD45B; GADD45G; IL2RA; JUN; JUNB; MAP3K8; NR4A1; PTGS2; RUNX1; SERPINE1; SPTBN1;
FOXA2 and FOXA3 transcription factor networks	7	43	2.02312	2.96286	0.0083161	1	0.151812	0.680916	PKLR; SP1; IGFBP1; AFP; CEBPA; GCK; CEBPD;
Posttranslational regulation of adherens junction stability and dissassembly	15	231	4.33526	1.18117	0.289001	1	1	1	CMTM2; MMP9; NRIP1; PLAUR; PTPN1; MEP1B; MYC; FOS; BRCA1; CYR61; JUN; KLF4; TMPRSS2; TNIK; VCAN;
BCR signaling pathway	4	67	1.15607	1.08785	0.507612	1	1	1	BCL2A1; LYN; FOS; JUN;
Signaling events mediated by TCPTP	11	92	3.17919	2.17528	0.0116594	1	0.196443	0.881097	BCL6; HMGA1; PTPN1; SOCS3; SP1; STAT3; COL1A2; LMAN1; IL4R; IRS2; SOCS1;
a4b7 Integrin signaling	1	9	0.289017	2.03779	0.39923	1	1	1	CD44;
Signaling events mediated by VEGFR1 and VEGFR2	111	1293	32.0809	1.56071	1.49008e-07	0.000248545	1.01767e-05	4.56451e-05	ADRB2; ALDOA; BCL2A1; BCL6; BHLHE40; CMTM2; ERBB2; FGR; FLT1; FOSL1; FOSL2; FPR1; FPR2; HCK; HMGA1; HMOX1; ICAM1; IRF1; ITGAM; ITGB2; JUND; KRT8; SOD2; MAP2K3; LSP1; LYN; MAP3K14; BCL3; MMP9; NFATC2; NRIP1; PEG10; PIM1; PLAUR; PPP1R15A; PRKCI; PTPN1; PTPRE; RALGDS; RELB; RPS6KA5; SIN3A; SLA; SLC11A1; SOCS3; SP1; STAT3; TGFB1; TNFRSF10C; VASP; WASL; ZYX; COL1A2; HSP90B1; LMAN1; LPP; MAF; NT5E; MEP…
Beta1 integrin cell surface interactions	117	1348	33.815	1.57795	2.86967e-08	4.78661e-05	6.93032e-06	3.10842e-05	ADRB2; ALDOA; BCL2A1; BCL6; BHLHE40; CMTM2; CSF2RB; ERBB2; FGR; FOSL1; FOSL2; FPR1; FPR2; HCK; HMGA1; HMOX1; ICAM1; IRF1; ITGAM; ITGB2; JUND; KCNJ15; KRT8; SOD2; MAP2K3; LSP1; LYN; MAP3K14; BCL3; MMP9; NFATC2; NRIP1; PEG10; PIM1; PLAUR; PPP1R15A; PRKCI; PTPN1; PTPRE; RALGDS; RELB; RPS6KA5; SIN3A; SLA; SLC11A1; SOCS3; SP1; STAT3; TGFB1; TNFRSF10C; VASP; WASL; ZYX; COL1A2; HSP90B1; LMAN1; LPP; MAF;…
Thromboxane A2 receptor signaling	6	54	1.7341	2.02285	0.0744038	1	0.77566	1	FGR; HCK; ICAM1; LYN; PRKCZ; TGM2;
Urokinase-type plasminogen activator (uPA) and uPAR-mediated signaling	110	1285	31.7919	1.55628	2.04712e-07	0.00034146	1.01767e-05	4.56451e-05	ADRB2; ALDOA; BCL2A1; BCL6; BHLHE40; CMTM2; ERBB2; FGR; FOSL1; FOSL2; FPR1; FPR2; HCK; HMGA1; HMOX1; ICAM1; IRF1; ITGAM; ITGB2; JUND; KRT8; SOD2; MAP2K3; LSP1; LYN; MAP3K14; BCL3; MMP9; NFATC2; NRIP1; PEG10; PIM1; PLAUR; PPP1R15A; PRKCI; PTPN1; PTPRE; RALGDS; RELB; RPS6KA5; SIN3A; SLA; SLC11A1; SOCS3; SP1; STAT3; TGFB1; TNFRSF10C; VASP; WASL; ZYX; COL1A2; HSP90B1; LMAN1; LPP; MAF; NT5E; MEP1B; MY…
Ras signaling in the CD4+ TCR pathway	8	42	2.31214	3.46611	0.00175786	1	0.0375911	0.168605	FOSL1; NFATC2; FOS; IL2RA; JUN; JUNB; MAP3K8; PTGS2;
TCR signaling in na&#xef;ve CD8+ T cells	13	127	3.75723	1.8621	0.0218414	1	0.322402	1	FOSL1; MAP3K14; BCL3; NFATC2; RASSF5; RELB; FOS; EGR1; IL2RA; JUN; JUNB; MAP3K8; NFKB2;
Ceramide signaling pathway	4	49	1.15607	1.48738	0.282581	1	1	1	BIRC3; MYC; PRKCZ; SPHK2;
Reelin signaling pathway	1	29	0.289017	0.632902	0.806901	1	1	1	MAP1B;
Signaling mediated by p38-alpha and p38-beta	5	50	1.44509	1.82114	0.138399	1	1	1	KRT8; LSP1; RPS6KA5; JUN; PTGS2;
Signaling by Aurora kinases	6	98	1.7341	1.11472	0.454637	1	1	1	MAP3K14; BCL3; RELB; CBX5; BRCA1; NFKB2;
S1P3 pathway	3	29	0.867052	1.88617	0.212046	1	1	1	FLT1; GNAO1; CXCR4;
Validated nuclear estrogen receptor alpha network	5	64	1.44509	1.42283	0.275239	1	1	1	NRIP1; MYC; BRCA1; JUN; NCOA7;
Polo-like kinase signaling events in the cell cycle	7	109	2.02312	1.169	0.392882	1	1	1	MAP3K14; BCL3; PLK2; RELB; BRCA1; NINL; NFKB2;
IFN-gamma pathway	111	1293	32.0809	1.56071	1.49008e-07	0.000248545	1.01767e-05	4.56451e-05	ADRB2; ALDOA; BCL2A1; BCL6; BHLHE40; CMTM2; ERBB2; FGR; FOSL1; FOSL2; FPR1; FPR2; HCK; HMGA1; HMOX1; ICAM1; IRF1; ITGAM; ITGB2; JUND; KRT8; SOD2; MAP2K3; LSP1; LYN; MAP3K14; BCL3; MMP9; NFATC2; NRIP1; PEG10; PIM1; PLAUR; PPP1R15A; PRKCI; PTPN1; PTPRE; RALGDS; RELB; RPS6KA5; SIN3A; SLA; SLC11A1; SOCS3; SP1; STAT3; TGFB1; TNFRSF10C; VASP; WASL; ZYX; COL1A2; HSP90B1; LMAN1; LPP; MAF; NT5E; MEP1B; MY…
Regulation of RAC1 activity	17	205	4.91329	1.50831	0.0581224	1	0.625472	1	JUND; MAP2K3; NCF1; NCF2; SOCS3; STAT3; RAP1GDS1; FOS; BRCA1; PRKCZ; ATF3; CIT; CYR61; IL6; JUN; JUNB; LIMK2;
PAR1-mediated thrombin signaling events	110	1296	31.7919	1.54307	3.24269e-07	0.000540881	1.31094e-05	5.87991e-05	ADRB2; ALDOA; BCL2A1; BCL6; BHLHE40; CMTM2; ERBB2; FGR; FOSL1; FOSL2; FPR1; FPR2; HCK; HMGA1; HMOX1; ICAM1; IRF1; ITGAM; ITGB2; JUND; KRT8; SOD2; MAP2K3; LSP1; LYN; MAP3K14; BCL3; MMP9; NFATC2; NRIP1; PEG10; PIM1; PLAUR; PPP1R15A; PRKCI; PTPN1; PTPRE; RALGDS; RELB; RPS6KA5; SIN3A; SLA; SLC11A1; SOCS3; SP1; STAT3; TGFB1; TNFRSF10C; VASP; WASL; ZYX; COL1A2; HSP90B1; LMAN1; LPP; MAF; NT5E; MEP1B; MY…
IL12 signaling mediated by STAT4	7	29	2.02312	4.39271	0.000780972	1	0.0178447	0.0800379	IL18RAP; IRF1; STAT3; TGFB1; FOS; IL2RA; JUN;
Beta3 integrin cell surface interactions	8	43	2.31214	3.38552	0.00205842	1	0.0434613	0.194935	PECAM1; PLAUR; SDC4; COL1A2; LAMA4; CYR61; PVR; THBS1;
Noncanonical Wnt signaling pathway	15	182	4.33526	1.49916	0.0751706	1	0.778786	1	CMTM2; MMP9; NFATC2; NRIP1; MYC; BRCA1; PRKCZ; WNT5A; CYR61; FZD7; JUN; KLF4; TMPRSS2; TNIK; VCAN;
Regulation of p38-alpha and p38-beta	22	164	6.35838	2.43957	8.14948e-05	0.135933	0.00226556	0.0101616	FGR; FOSL1; HCK; KRT8; MAP2K3; LSP1; LYN; NFATC2; PIM1; PTPN1; RPS6KA5; MAF; FOS; PRKCZ; EGR1; EGR3; IL2RA; JUN; JUNB; MAP3K8; NR4A1; PTGS2;
Alpha4 beta1 integrin signaling events	1	33	0.289017	0.55621	0.846185	1	1	1	THBS1;
S1P4 pathway	1	14	0.289017	1.31053	0.54749	1	1	1	GNAO1;
VEGFR1 specific signals	1	29	0.289017	0.632902	0.806901	1	1	1	FLT1;
PDGFR-beta signaling pathway	110	1285	31.7919	1.55628	2.04712e-07	0.00034146	1.01767e-05	4.56451e-05	ADRB2; ALDOA; BCL2A1; BCL6; BHLHE40; CMTM2; ERBB2; FGR; FOSL1; FOSL2; FPR1; FPR2; HCK; HMGA1; HMOX1; ICAM1; IRF1; ITGAM; ITGB2; JUND; KRT8; SOD2; MAP2K3; LSP1; LYN; MAP3K14; BCL3; MMP9; NFATC2; NRIP1; PEG10; PIM1; PLAUR; PPP1R15A; PRKCI; PTPN1; PTPRE; RALGDS; RELB; RPS6KA5; SIN3A; SLA; SLC11A1; SOCS3; SP1; STAT3; TGFB1; TNFRSF10C; VASP; WASL; ZYX; COL1A2; HSP90B1; LMAN1; LPP; MAF; NT5E; MEP1B; MY…
p63 transcription factor network	11	105	3.17919	1.90598	0.0287583	1	0.4031	1	FASN; FOSL2; SP1; TRAF4; GDF15; OGG1; TP53I3; CDKN1A; CEBPD; NRG1; RUNX1;
Canonical Wnt signaling pathway	11	155	3.17919	1.29119	0.232665	1	1	1	CMTM2; MMP9; NRIP1; MYC; BRCA1; CYR61; JUN; KLF4; TMPRSS2; TNIK; VCAN;
HIF-2-alpha transcription factor network	4	34	1.15607	2.14339	0.114244	1	0.992493	1	BHLHE40; FLT1; SP1; SERPINE1;
E-cadherin signaling in the nascent adherens junction	19	275	5.49133	1.2566	0.178868	1	1	1	CMTM2; MMP9; NRIP1; PLAUR; PTPN1; VASP; ZYX; LPP; MEP1B; MYC; FOS; BRCA1; CYR61; EPHA2; JUN; KLF4; TMPRSS2; TNIK; VCAN;
EPHB forward signaling	1	40	0.289017	0.458897	0.896729	1	1	1	WASL;
Integrin-linked kinase signaling	71	654	20.5202	1.97378	6.95609e-09	1.16028e-05	3.86759e-06	1.73471e-05	ALDOA; BHLHE40; CMTM2; FGR; FOSL1; FOSL2; HCK; HMOX1; ICAM1; IRF1; ITGB2; JUND; KRT8; MAP2K3; LSP1; LYN; MMP9; NFATC2; NRIP1; PIM1; PLAUR; PPP1R15A; PTPN1; PTPRE; RPS6KA5; SIN3A; SOCS3; SP1; STAT3; TGFB1; ZYX; COL1A2; HSP90B1; MAF; NT5E; MYC; IGFBP1; FOSB; FOS; AFP; BRCA1; GCK; PRKCZ; ATF3; CCL2; CDKN1A; CEBPD; CXCR4; CYR61; EGR1; EGR3; FOXO1; GADD45B; GADD45G; IL2RA; IL6; JUN; JUNB; KLF4; LIF; M…
Regulation of nuclear beta catenin signaling and target gene transcription	11	135	3.17919	1.48246	0.12298	1	1	1	CMTM2; MMP9; NRIP1; MYC; BRCA1; CYR61; JUN; KLF4; TMPRSS2; TNIK; VCAN;
Ephrin B reverse signaling	4	30	1.15607	2.42908	0.0798469	1	0.802317	1	FGR; HCK; LYN; CXCR4;
p38 MAPK signaling pathway	24	189	6.93642	2.30925	9.45337e-05	0.157682	0.00258496	0.0115942	FGR; FOSL1; HCK; KRT8; MAP2K3; LSP1; LYN; NFATC2; PIM1; PTPN1; RPS6KA5; MAF; FOS; PRKCZ; EGR1; EGR3; GADD45B; GADD45G; IL2RA; JUN; JUNB; MAP3K8; NR4A1; PTGS2;
EGF receptor (ErbB1) signaling pathway	110	1285	31.7919	1.55628	2.04712e-07	0.00034146	1.01767e-05	4.56451e-05	ADRB2; ALDOA; BCL2A1; BCL6; BHLHE40; CMTM2; ERBB2; FGR; FOSL1; FOSL2; FPR1; FPR2; HCK; HMGA1; HMOX1; ICAM1; IRF1; ITGAM; ITGB2; JUND; KRT8; SOD2; MAP2K3; LSP1; LYN; MAP3K14; BCL3; MMP9; NFATC2; NRIP1; PEG10; PIM1; PLAUR; PPP1R15A; PRKCI; PTPN1; PTPRE; RALGDS; RELB; RPS6KA5; SIN3A; SLA; SLC11A1; SOCS3; SP1; STAT3; TGFB1; TNFRSF10C; VASP; WASL; ZYX; COL1A2; HSP90B1; LMAN1; LPP; MAF; NT5E; MEP1B; MY…
p75(NTR)-mediated signaling	13	178	3.75723	1.3286	0.180373	1	1	1	BIRC3; MAP2K3; MAP3K14; BCL3; PRKCI; RELB; RPS6KA5; SORT1; STAT3; FOS; PRKCZ; EGR1; NFKB2;
Thrombin/protease-activated receptor (PAR) pathway	110	1297	31.7919	1.54188	3.37953e-07	0.000563706	1.31094e-05	5.87991e-05	ADRB2; ALDOA; BCL2A1; BCL6; BHLHE40; CMTM2; ERBB2; FGR; FOSL1; FOSL2; FPR1; FPR2; HCK; HMGA1; HMOX1; ICAM1; IRF1; ITGAM; ITGB2; JUND; KRT8; SOD2; MAP2K3; LSP1; LYN; MAP3K14; BCL3; MMP9; NFATC2; NRIP1; PEG10; PIM1; PLAUR; PPP1R15A; PRKCI; PTPN1; PTPRE; RALGDS; RELB; RPS6KA5; SIN3A; SLA; SLC11A1; SOCS3; SP1; STAT3; TGFB1; TNFRSF10C; VASP; WASL; ZYX; COL1A2; HSP90B1; LMAN1; LPP; MAF; NT5E; MEP1B; MY…
Class I PI3K signaling events	110	1285	31.7919	1.55628	2.04712e-07	0.00034146	1.01767e-05	4.56451e-05	ADRB2; ALDOA; BCL2A1; BCL6; BHLHE40; CMTM2; ERBB2; FGR; FOSL1; FOSL2; FPR1; FPR2; HCK; HMGA1; HMOX1; ICAM1; IRF1; ITGAM; ITGB2; JUND; KRT8; SOD2; MAP2K3; LSP1; LYN; MAP3K14; BCL3; MMP9; NFATC2; NRIP1; PEG10; PIM1; PLAUR; PPP1R15A; PRKCI; PTPN1; PTPRE; RALGDS; RELB; RPS6KA5; SIN3A; SLA; SLC11A1; SOCS3; SP1; STAT3; TGFB1; TNFRSF10C; VASP; WASL; ZYX; COL1A2; HSP90B1; LMAN1; LPP; MAF; NT5E; MEP1B; MY…
Arf6 signaling events	110	1285	31.7919	1.55628	2.04712e-07	0.00034146	1.01767e-05	4.56451e-05	ADRB2; ALDOA; BCL2A1; BCL6; BHLHE40; CMTM2; ERBB2; FGR; FOSL1; FOSL2; FPR1; FPR2; HCK; HMGA1; HMOX1; ICAM1; IRF1; ITGAM; ITGB2; JUND; KRT8; SOD2; MAP2K3; LSP1; LYN; MAP3K14; BCL3; MMP9; NFATC2; NRIP1; PEG10; PIM1; PLAUR; PPP1R15A; PRKCI; PTPN1; PTPRE; RALGDS; RELB; RPS6KA5; SIN3A; SLA; SLC11A1; SOCS3; SP1; STAT3; TGFB1; TNFRSF10C; VASP; WASL; ZYX; COL1A2; HSP90B1; LMAN1; LPP; MAF; NT5E; MEP1B; MY…
EPO signaling pathway	3	34	0.867052	1.60888	0.287041	1	1	1	LYN; SOCS3; IRS2;
Plasma membrane estrogen receptor signaling	111	1298	32.0809	1.5547	1.84231e-07	0.000307297	1.01767e-05	4.56451e-05	ADRB2; ALDOA; BCL2A1; BCL6; BHLHE40; CMTM2; ERBB2; FGR; FOSL1; FOSL2; FPR1; FPR2; HCK; HMGA1; HMOX1; ICAM1; IRF1; ITGAM; ITGB2; JUND; KRT8; SOD2; MAP2K3; LSP1; LYN; MAP3K14; BCL3; MMP9; NFATC2; NRIP1; PEG10; PIM1; PLAUR; PPP1R15A; PRKCI; PTPN1; PTPRE; RALGDS; RELB; RPS6KA5; SIN3A; SLA; SLC11A1; SOCS3; SP1; STAT3; TGFB1; TNFRSF10C; VASP; WASL; ZYX; COL1A2; HSP90B1; LMAN1; LPP; MAF; NT5E; MEP1B; MY…
FoxO family signaling	3	49	0.867052	1.11646	0.510706	1	1	1	BCL6; SOD2; FOXO1;
IL2-mediated signaling events	17	115	4.91329	2.68863	0.000160881	0.268349	0.00425952	0.019105	MAP3K14; BCL3; RELB; SOCS3; SP1; STAT3; UGCG; MYC; FOS; PRKCZ; CISH; IL2RA; IRS2; JUN; NFKB2; SOCS1; SOCS2;
FAS (CD95) signaling pathway	11	130	3.17919	1.53948	0.101218	1	0.944302	1	BIRC3; CASP7; LMNB1; MAP3K14; BCL3; RELB; MYC; PRKCZ; SPHK2; CASP4; NFKB2;
C-MYB transcription factor network	13	84	3.75723	2.8152	0.000602282	1	0.0141494	0.0634635	BIRC3; LYZ; PIM1; SIN3A; SP1; COL1A2; MAF; MYC; CEBPA; CDKN1A; CEBPD; ETS2; PTGS2;
p73 transcription factor network	13	78	3.75723	3.03172	0.000286203	0.477386	0.00702039	0.0314882	FASN; SP1; MYC; GDF15; AFP; RNF43; TP53I3; CDKN1A; GRAMD4; IL4R; SERPINA1; SERPINE1; WT1;
Signaling events mediated by HDAC Class III	6	39	1.7341	2.80067	0.018562	1	0.286679	1	ACSS2; HIST1H1E; HIST1H4B; HIST1H4E; CDKN1A; FOXO1;
FOXM1 transcription factor network	5	42	1.44509	2.16794	0.0786119	1	0.799541	1	SP1; MYC; FOS; LAMA4; ONECUT1;
IL3-mediated signaling events	112	1292	32.3699	1.57599	7.32137e-08	0.00012212	9.62475e-06	4.31694e-05	ADRB2; ALDOA; BCL2A1; BCL6; BHLHE40; CMTM2; CSF2RB; ERBB2; FGR; FOSL1; FOSL2; FPR1; FPR2; HCK; HMGA1; HMOX1; ICAM1; IRF1; ITGAM; ITGB2; JUND; KRT8; SOD2; MAP2K3; LSP1; LYN; MAP3K14; BCL3; MMP9; NFATC2; NRIP1; PEG10; PIM1; PLAUR; PPP1R15A; PRKCI; PTPN1; PTPRE; RALGDS; RELB; RPS6KA5; SIN3A; SLA; SLC11A1; SOCS3; SP1; STAT3; TGFB1; TNFRSF10C; VASP; WASL; ZYX; COL1A2; HSP90B1; LMAN1; LPP; MAF; NT5E; M…
AP-1 transcription factor network	70	621	20.2312	2.04939	1.79519e-09	2.99438e-06	2.99438e-06	1.34306e-05	ALDOA; BHLHE40; CMTM2; FGR; FOSL1; FOSL2; HCK; HMOX1; ICAM1; IRF1; ITGB2; JUND; KRT8; MAP2K3; LSP1; LYN; MMP9; NFATC2; NRIP1; PIM1; PLAUR; PPP1R15A; PTPN1; PTPRE; RPS6KA5; SIN3A; SOCS3; SP1; STAT3; TGFB1; COL1A2; HSP90B1; MAF; NT5E; MYC; IGFBP1; FOSB; FOS; AFP; BRCA1; GCK; PRKCZ; ATF3; CCL2; CDKN1A; CEBPD; CXCR4; CYR61; EGR1; EGR3; FOXO1; GADD45B; GADD45G; IL2RA; IL6; JUN; JUNB; KLF4; LIF; MAP3K8…
Signaling events regulated by Ret tyrosine kinase	6	69	1.7341	1.58316	0.177621	1	1	1	MAP3K14; BCL3; RELB; IRS2; JUN; NFKB2;
Hypoxic and oxygen homeostasis regulation of HIF-1-alpha	13	80	3.75723	2.95594	0.000370205	0.617503	0.00894931	0.0401399	ALDOA; BHLHE40; HMOX1; ITGB2; SP1; NT5E; IGFBP1; FOS; GCK; CXCR4; JUN; PFKFB3; SERPINE1;
amb2 Integrin signaling	10	40	2.89017	4.54808	4.28513e-05	0.0714759	0.00125396	0.00562434	FGR; HCK; ICAM1; ITGAM; ITGB2; LYN; MMP9; PLAUR; PRKCZ; IL6;
Glucocorticoid receptor signaling	9	85	2.60116	1.92671	0.0429185	1	0.526383	1	ICAM1; IRF1; FOS; AFP; CDKN1A; EGR1; IL6; JUN; NR4A1;
Hedgehog signaling events mediated by Gli proteins	2	48	0.578035	0.761074	0.750171	1	1	1	SIN3A; GNAO1;
mTOR signaling pathway	110	1285	31.7919	1.55628	2.04712e-07	0.00034146	1.01767e-05	4.56451e-05	ADRB2; ALDOA; BCL2A1; BCL6; BHLHE40; CMTM2; ERBB2; FGR; FOSL1; FOSL2; FPR1; FPR2; HCK; HMGA1; HMOX1; ICAM1; IRF1; ITGAM; ITGB2; JUND; KRT8; SOD2; MAP2K3; LSP1; LYN; MAP3K14; BCL3; MMP9; NFATC2; NRIP1; PEG10; PIM1; PLAUR; PPP1R15A; PRKCI; PTPN1; PTPRE; RALGDS; RELB; RPS6KA5; SIN3A; SLA; SLC11A1; SOCS3; SP1; STAT3; TGFB1; TNFRSF10C; VASP; WASL; ZYX; COL1A2; HSP90B1; LMAN1; LPP; MAF; NT5E; MEP1B; MY…
RAC1 signaling pathway	17	205	4.91329	1.50831	0.0581224	1	0.625472	1	JUND; MAP2K3; NCF1; NCF2; SOCS3; STAT3; RAP1GDS1; FOS; BRCA1; PRKCZ; ATF3; CIT; CYR61; IL6; JUN; JUNB; LIMK2;
ErbB receptor signaling network	112	1308	32.3699	1.55671	1.45909e-07	0.000243376	1.01767e-05	4.56451e-05	ADRB2; ALDOA; BCL2A1; BCL6; BHLHE40; CMTM2; ERBB2; FGR; FOSL1; FOSL2; FPR1; FPR2; HCK; HMGA1; HMOX1; ICAM1; IRF1; ITGAM; ITGB2; JUND; KRT8; SOD2; MAP2K3; LSP1; LYN; MAP3K14; BCL3; MMP9; NFATC2; NRIP1; PEG10; PIM1; PLAUR; PPP1R15A; PRKCI; PTPN1; PTPRE; RALGDS; RELB; RPS6KA5; SIN3A; SLA; SLC11A1; SOCS3; SP1; STAT3; TGFB1; TNFRSF10C; VASP; WASL; ZYX; COL1A2; HSP90B1; LMAN1; LPP; MAF; NT5E; MEP1B; MY…
Signaling events mediated by focal adhesion kinase	110	1285	31.7919	1.55628	2.04712e-07	0.00034146	1.01767e-05	4.56451e-05	ADRB2; ALDOA; BCL2A1; BCL6; BHLHE40; CMTM2; ERBB2; FGR; FOSL1; FOSL2; FPR1; FPR2; HCK; HMGA1; HMOX1; ICAM1; IRF1; ITGAM; ITGB2; JUND; KRT8; SOD2; MAP2K3; LSP1; LYN; MAP3K14; BCL3; MMP9; NFATC2; NRIP1; PEG10; PIM1; PLAUR; PPP1R15A; PRKCI; PTPN1; PTPRE; RALGDS; RELB; RPS6KA5; SIN3A; SLA; SLC11A1; SOCS3; SP1; STAT3; TGFB1; TNFRSF10C; VASP; WASL; ZYX; COL1A2; HSP90B1; LMAN1; LPP; MAF; NT5E; MEP1B; MY…
VEGF and VEGFR signaling network	111	1301	32.0809	1.55112	2.09043e-07	0.000348683	1.01767e-05	4.56451e-05	ADRB2; ALDOA; BCL2A1; BCL6; BHLHE40; CMTM2; ERBB2; FGR; FLT1; FOSL1; FOSL2; FPR1; FPR2; HCK; HMGA1; HMOX1; ICAM1; IRF1; ITGAM; ITGB2; JUND; KRT8; SOD2; MAP2K3; LSP1; LYN; MAP3K14; BCL3; MMP9; NFATC2; NRIP1; PEG10; PIM1; PLAUR; PPP1R15A; PRKCI; PTPN1; PTPRE; RALGDS; RELB; RPS6KA5; SIN3A; SLA; SLC11A1; SOCS3; SP1; STAT3; TGFB1; TNFRSF10C; VASP; WASL; ZYX; COL1A2; HSP90B1; LMAN1; LPP; MAF; NT5E; MEP…
Insulin-mediated glucose transport	2	29	0.578035	1.25954	0.47939	1	1	1	PRKCI; PRKCZ;
Glucocorticoid receptor regulatory network	9	80	2.60116	2.04712	0.0306424	1	0.412189	1	ICAM1; IRF1; FOS; AFP; CDKN1A; EGR1; IL6; JUN; NR4A1;
Alpha9 beta1 integrin signaling events	114	1302	32.948	1.59181	2.90841e-08	4.85123e-05	6.93032e-06	3.10842e-05	ADRB2; ALDOA; BCL2A1; BCL6; BHLHE40; CMTM2; CSF2RB; ERBB2; FGR; FOSL1; FOSL2; FPR1; FPR2; HCK; HMGA1; HMOX1; ICAM1; IRF1; ITGAM; ITGB2; JUND; KCNJ15; KRT8; SOD2; MAP2K3; LSP1; LYN; MAP3K14; BCL3; MMP9; NFATC2; NRIP1; PEG10; PIM1; PLAUR; PPP1R15A; PRKCI; PTPN1; PTPRE; RALGDS; RELB; RPS6KA5; SIN3A; SLA; SLC11A1; SOCS3; SP1; STAT3; TGFB1; TNFRSF10C; VASP; WASL; ZYX; COL1A2; HSP90B1; LMAN1; LPP; MAF;…
IL8- and CXCR1-mediated signaling events	3	28	0.867052	1.95351	0.197578	1	1	1	FGR; HCK; LYN;
Syndecan-2-mediated signaling events	5	77	1.44509	1.18264	0.418574	1	1	1	MMP9; PLAUR; TGFB1; FOS; JUN;
Signaling events mediated by Stem cell factor receptor (c-Kit)	3	52	0.867052	1.05206	0.551337	1	1	1	LYN; STAT3; SOCS1;
ALK1 pathway	38	324	10.9827	2.13256	5.74519e-06	0.00958298	0.000187902	0.000842785	ACVR2B; FGR; FOSL1; HCK; KRT8; MAP2K3; LSP1; LYN; NFATC2; PIM1; PPP1R15A; PTPN1; RPS6KA5; SIN3A; SP1; TGFB1; COL1A2; MAF; MYC; FOS; PRKCZ; ATF3; CDKN1A; EGR1; EGR3; FOXO1; GADD45B; GADD45G; IL2RA; JUN; JUNB; MAP3K8; NR4A1; PTGS2; RUNX1; SERPINE1; SPTBN1; TGFB3;
ErbB4 signaling events	3	32	0.867052	1.7094	0.256641	1	1	1	ERBB2; HBEGF; NRG1;
Arf6 downstream pathway	110	1285	31.7919	1.55628	2.04712e-07	0.00034146	1.01767e-05	4.56451e-05	ADRB2; ALDOA; BCL2A1; BCL6; BHLHE40; CMTM2; ERBB2; FGR; FOSL1; FOSL2; FPR1; FPR2; HCK; HMGA1; HMOX1; ICAM1; IRF1; ITGAM; ITGB2; JUND; KRT8; SOD2; MAP2K3; LSP1; LYN; MAP3K14; BCL3; MMP9; NFATC2; NRIP1; PEG10; PIM1; PLAUR; PPP1R15A; PRKCI; PTPN1; PTPRE; RALGDS; RELB; RPS6KA5; SIN3A; SLA; SLC11A1; SOCS3; SP1; STAT3; TGFB1; TNFRSF10C; VASP; WASL; ZYX; COL1A2; HSP90B1; LMAN1; LPP; MAF; NT5E; MEP1B; MY…
JNK signaling in the CD4+ TCR pathway	8	42	2.31214	3.46611	0.00175786	1	0.0375911	0.168605	FOSL1; NFATC2; FOS; IL2RA; JUN; JUNB; MAP3K8; PTGS2;
Role of Calcineurin-dependent NFAT signaling in lymphocytes	15	95	4.33526	2.87193	0.000185064	0.308686	0.00474901	0.0213005	FOSL1; NFATC2; PIM1; PTPN1; MAF; FOS; PRKCZ; EGR1; EGR3; IL2RA; JUN; JUNB; MAP3K8; NR4A1; PTGS2;
IL4-mediated signaling events	8	62	2.31214	2.34819	0.019415	1	0.291378	1	BCL6; HMGA1; SOCS3; SP1; COL1A2; IL4R; IRS2; SOCS1;
HIV-1 Nef: Negative effector of Fas and TNF-alpha	3	35	0.867052	1.56292	0.302352	1	1	1	BIRC3; CASP7; MAP3K14;
Signaling events mediated by PTP1B	8	52	2.31214	2.79968	0.00694582	1	0.131655	0.590505	FCGR2A; FGR; HCK; LYN; PTPN1; SOCS3; STAT3; LEPR;
Validated transcriptional targets of AP1 family members Fra1 and Fra2	22	134	6.35838	2.9857	3.09802e-06	0.0051675	0.000107656	0.000482865	FOSL1; FOSL2; HMOX1; JUND; MMP9; NFATC2; PLAUR; PTPN1; SP1; COL1A2; MAF; FOS; CCL2; EGR1; EGR3; IL2RA; IL6; JUN; JUNB; LIF; PTGS2; THBD;
CXCR4-mediated signaling events	23	190	6.6474	2.20142	0.000271834	0.45342	0.00676746	0.0303537	FGR; FOSL1; HCK; LYN; MAP3K14; BCL3; MMP9; NFATC2; RASSF5; RELB; STAT3; FOS; GNAO1; PRKCZ; CXCR4; FOXO1; IL2RA; JUN; JUNB; MAP3K8; NFKB2; PTGS2; RGS1;
S1P1 pathway	110	1285	31.7919	1.55628	2.04712e-07	0.00034146	1.01767e-05	4.56451e-05	ADRB2; ALDOA; BCL2A1; BCL6; BHLHE40; CMTM2; ERBB2; FGR; FOSL1; FOSL2; FPR1; FPR2; HCK; HMGA1; HMOX1; ICAM1; IRF1; ITGAM; ITGB2; JUND; KRT8; SOD2; MAP2K3; LSP1; LYN; MAP3K14; BCL3; MMP9; NFATC2; NRIP1; PEG10; PIM1; PLAUR; PPP1R15A; PRKCI; PTPN1; PTPRE; RALGDS; RELB; RPS6KA5; SIN3A; SLA; SLC11A1; SOCS3; SP1; STAT3; TGFB1; TNFRSF10C; VASP; WASL; ZYX; COL1A2; HSP90B1; LMAN1; LPP; MAF; NT5E; MEP1B; MY…
FOXA1 transcription factor network	6	44	1.7341	2.48248	0.0319592	1	0.419748	1	NRIP1; SP1; FOS; BRCA1; JUN; SERPINA1;
Alpha-synuclein signaling	3	33	0.867052	1.65761	0.271794	1	1	1	FGR; HCK; LYN;
Netrin-mediated signaling events	2	32	0.578035	1.14149	0.53231	1	1	1	WASL; MAP1B;
EPHA2 forward signaling	1	19	0.289017	0.965833	0.659242	1	1	1	EPHA2;
ATM pathway	22	307	6.35838	1.30326	0.120306	1	1	1	BCL2A1; BCL6; CASP7; SP1; TNFRSF10C; CBX5; FANCL; MYC; GDF15; AFP; BRCA1; CEBPA; TP53I3; ATF3; BTG2; CDKN1A; EPHA2; JUN; LIF; SERPINE1; TNFRSF10D; VCAN;
TNF receptor signaling pathway	36	299	10.4046	2.18927	5.65183e-06	0.00942725	0.000187902	0.000842785	BIRC3; CASP7; FGR; FOSL1; HCK; KRT8; LMNB1; MAP2K3; LSP1; LYN; MAP3K14; BCL3; NFATC2; PIM1; PRKCI; PTPN1; RELB; RPS6KA5; MAF; MYC; FOS; PRKCZ; SPHK2; CASP4; EGR1; EGR3; GADD45B; GADD45G; IL2RA; JUN; JUNB; MAP3K8; NFKB2; NR4A1; PTGS2; TNIK;
p53 pathway	16	189	4.62428	1.53982	0.0556865	1	0.623389	1	BCL2A1; BCL6; SP1; TNFRSF10C; GDF15; AFP; TP53I3; ATF3; BTG2; CDKN1A; EPHA2; JUN; LIF; SERPINE1; TNFRSF10D; VCAN;
ErbB1 downstream signaling	110	1285	31.7919	1.55628	2.04712e-07	0.00034146	1.01767e-05	4.56451e-05	ADRB2; ALDOA; BCL2A1; BCL6; BHLHE40; CMTM2; ERBB2; FGR; FOSL1; FOSL2; FPR1; FPR2; HCK; HMGA1; HMOX1; ICAM1; IRF1; ITGAM; ITGB2; JUND; KRT8; SOD2; MAP2K3; LSP1; LYN; MAP3K14; BCL3; MMP9; NFATC2; NRIP1; PEG10; PIM1; PLAUR; PPP1R15A; PRKCI; PTPN1; PTPRE; RALGDS; RELB; RPS6KA5; SIN3A; SLA; SLC11A1; SOCS3; SP1; STAT3; TGFB1; TNFRSF10C; VASP; WASL; ZYX; COL1A2; HSP90B1; LMAN1; LPP; MAF; NT5E; MEP1B; MY…
EGFR-dependent Endothelin signaling events	110	1286	31.7919	1.55507	2.1354e-07	0.000356185	1.01767e-05	4.56451e-05	ADRB2; ALDOA; BCL2A1; BCL6; BHLHE40; CMTM2; ERBB2; FGR; FOSL1; FOSL2; FPR1; FPR2; HCK; HMGA1; HMOX1; ICAM1; IRF1; ITGAM; ITGB2; JUND; KRT8; SOD2; MAP2K3; LSP1; LYN; MAP3K14; BCL3; MMP9; NFATC2; NRIP1; PEG10; PIM1; PLAUR; PPP1R15A; PRKCI; PTPN1; PTPRE; RALGDS; RELB; RPS6KA5; SIN3A; SLA; SLC11A1; SOCS3; SP1; STAT3; TGFB1; TNFRSF10C; VASP; WASL; ZYX; COL1A2; HSP90B1; LMAN1; LPP; MAF; NT5E; MEP1B; MY…
Syndecan-4-mediated signaling events	18	209	5.20231	1.56642	0.038313	1	0.48614	1	CMTM2; MMP9; NFATC2; NRIP1; SDC4; MYC; BRCA1; PRKCZ; WNT5A; CXCR4; CYR61; FZD7; JUN; KLF4; THBS1; TMPRSS2; TNIK; VCAN;
Nongenotropic Androgen signaling	2	26	0.578035	1.40481	0.422972	1	1	1	FOS; GNAO1;
Alpha6 beta4 integrin-ligand interactions	1	11	0.289017	1.66762	0.4636	1	1	1	LAMC2;
IL8-mediated signaling events	6	38	1.7341	2.87435	0.0164435	1	0.261217	1	CXCR2; FGR; HCK; LYN; RAC2; VASP;
ATR signaling pathway	18	250	5.20231	1.30954	0.144825	1	1	1	BCL2A1; BCL6; SP1; TNFRSF10C; FANCL; GDF15; AFP; BRCA1; TP53I3; ATF3; BTG2; CDKN1A; EPHA2; JUN; LIF; SERPINE1; TNFRSF10D; VCAN;
RXR and RAR heterodimerization with other nuclear receptor	2	26	0.578035	1.40481	0.422972	1	1	1	TGFB1; NR4A1;
Regulation of nuclear SMAD2/3 signaling	35	305	10.1156	2.08661	2.21633e-05	0.0369684	0.000672153	0.00301478	FGR; FOSL1; HCK; KRT8; MAP2K3; LSP1; LYN; NFATC2; PIM1; PPP1R15A; PTPN1; RPS6KA5; SIN3A; SP1; COL1A2; MAF; MYC; FOS; PRKCZ; ATF3; CDKN1A; EGR1; EGR3; FOXO1; GADD45B; GADD45G; IL2RA; JUN; JUNB; MAP3K8; NR4A1; PTGS2; RUNX1; SERPINE1; SPTBN1;
ALK1 signaling events	38	321	10.9827	2.15249	4.59499e-06	0.00766444	0.000156417	0.00070157	ACVR2B; FGR; FOSL1; HCK; KRT8; MAP2K3; LSP1; LYN; NFATC2; PIM1; PPP1R15A; PTPN1; RPS6KA5; SIN3A; SP1; TGFB1; COL1A2; MAF; MYC; FOS; PRKCZ; ATF3; CDKN1A; EGR1; EGR3; FOXO1; GADD45B; GADD45G; IL2RA; JUN; JUNB; MAP3K8; NR4A1; PTGS2; RUNX1; SERPINE1; SPTBN1; TGFB3;
PDGFR-alpha signaling pathway	2	21	0.578035	1.73913	0.322709	1	1	1	FOS; JUN;
Angiopoietin receptor Tie2-mediated signaling	2	50	0.578035	0.730637	0.77019	1	1	1	CDKN1A; FOXO1;
Arf6 trafficking events	110	1285	31.7919	1.55628	2.04712e-07	0.00034146	1.01767e-05	4.56451e-05	ADRB2; ALDOA; BCL2A1; BCL6; BHLHE40; CMTM2; ERBB2; FGR; FOSL1; FOSL2; FPR1; FPR2; HCK; HMGA1; HMOX1; ICAM1; IRF1; ITGAM; ITGB2; JUND; KRT8; SOD2; MAP2K3; LSP1; LYN; MAP3K14; BCL3; MMP9; NFATC2; NRIP1; PEG10; PIM1; PLAUR; PPP1R15A; PRKCI; PTPN1; PTPRE; RALGDS; RELB; RPS6KA5; SIN3A; SLA; SLC11A1; SOCS3; SP1; STAT3; TGFB1; TNFRSF10C; VASP; WASL; ZYX; COL1A2; HSP90B1; LMAN1; LPP; MAF; NT5E; MEP1B; MY…
Alternative NF-kappaB pathway	3	6	0.867052	9.10447	0.00291379	1	0.0600025	0.269126	MAP3K14; RELB; NFKB2;
E-cadherin signaling events	19	280	5.49133	1.23416	0.199695	1	1	1	CMTM2; MMP9; NRIP1; PLAUR; PTPN1; VASP; ZYX; LPP; MEP1B; MYC; FOS; BRCA1; CYR61; EPHA2; JUN; KLF4; TMPRSS2; TNIK; VCAN;
Androgen-mediated signaling	10	130	2.89017	1.39965	0.17741	1	1	1	CMTM2; NRIP1; FOS; BRCA1; CEBPA; GNAO1; EGR1; FOXO1; JUN; TMPRSS2;
Endothelins	110	1304	31.7919	1.53361	4.50347e-07	0.000751179	1.66929e-05	7.48717e-05	ADRB2; ALDOA; BCL2A1; BCL6; BHLHE40; CMTM2; ERBB2; FGR; FOSL1; FOSL2; FPR1; FPR2; HCK; HMGA1; HMOX1; ICAM1; IRF1; ITGAM; ITGB2; JUND; KRT8; SOD2; MAP2K3; LSP1; LYN; MAP3K14; BCL3; MMP9; NFATC2; NRIP1; PEG10; PIM1; PLAUR; PPP1R15A; PRKCI; PTPN1; PTPRE; RALGDS; RELB; RPS6KA5; SIN3A; SLA; SLC11A1; SOCS3; SP1; STAT3; TGFB1; TNFRSF10C; VASP; WASL; ZYX; COL1A2; HSP90B1; LMAN1; LPP; MAF; NT5E; MEP1B; MY…
Beta5 beta6 beta7 and beta8 integrin cell surface interactions	2	17	0.578035	2.1481	0.239546	1	1	1	PLAUR; CYR61;
Presenilin action in Notch and Wnt signaling	4	46	1.15607	1.58436	0.245545	1	1	1	MYC; FOS; FRAT1; JUN;
a6b1 and a6b4 Integrin signaling	3	35	0.867052	1.56292	0.302352	1	1	1	CASP7; ERBB2; PMP22;
Regulation of retinoblastoma protein	4	66	1.15607	1.10433	0.495682	1	1	1	CEBPA; CDKN1A; CEBPD; JUN;
TCR signaling in na&#xef;ve CD4+ T cells	13	133	3.75723	1.7781	0.0305662	1	0.412189	1	FOSL1; MAP3K14; BCL3; NFATC2; RASSF5; RELB; FOS; IL2RA; JUN; JUNB; MAP3K8; NFKB2; PTGS2;
Notch signaling pathway	4	94	1.15607	0.775413	0.768252	1	1	1	GATA4; STAT3; MYC; CDKN1A;
E2F transcription factor network	8	73	2.31214	1.9944	0.0460226	1	0.552271	1	CASP7; SP1; CBX5; MYC; BRCA1; CEBPA; CDKN1A; SERPINE1;
IL5-mediated signaling events	112	1289	32.3699	1.57966	6.41848e-08	0.00010706	9.62475e-06	4.31694e-05	ADRB2; ALDOA; BCL2A1; BCL6; BHLHE40; CMTM2; CSF2RB; ERBB2; FGR; FOSL1; FOSL2; FPR1; FPR2; HCK; HMGA1; HMOX1; ICAM1; IRF1; ITGAM; ITGB2; JUND; KRT8; SOD2; MAP2K3; LSP1; LYN; MAP3K14; BCL3; MMP9; NFATC2; NRIP1; PEG10; PIM1; PLAUR; PPP1R15A; PRKCI; PTPN1; PTPRE; RALGDS; RELB; RPS6KA5; SIN3A; SLA; SLC11A1; SOCS3; SP1; STAT3; TGFB1; TNFRSF10C; VASP; WASL; ZYX; COL1A2; HSP90B1; LMAN1; LPP; MAF; NT5E; M…
IL23-mediated signaling events	12	66	3.46821	3.30747	0.000210688	0.351428	0.00532466	0.0238824	CXCL1; IL18RAP; MAP3K14; BCL3; RELB; SOCS3; STAT3; CCL2; IL1B; IL24; IL6; NFKB2;
Direct p53 effectors	16	138	4.62428	2.10884	0.00355579	1	0.0707152	0.317175	BCL2A1; BCL6; SP1; TNFRSF10C; GDF15; AFP; TP53I3; ATF3; BTG2; CDKN1A; EPHA2; JUN; LIF; SERPINE1; TNFRSF10D; VCAN;
Retinoic acid receptors-mediated signaling	3	47	0.867052	1.16396	0.482576	1	1	1	NRIP1; TGFB1; NR4A1;
E-cadherin signaling in keratinocytes	2	21	0.578035	1.73913	0.322709	1	1	1	VASP; ZYX;
IL12-mediated signaling events	20	111	5.78035	3.27678	1.99216e-06	0.00332292	7.07004e-05	0.000317109	CCL4; IL18RAP; IRF1; MAP2K3; MAP3K14; BCL3; RELB; STAT3; TGFB1; FOS; SPHK2; CCL3; GADD45B; GADD45G; IL1B; IL2RA; IL6; JUN; NFKB2; SOCS1;
IL2 signaling events mediated by PI3K	8	67	2.31214	2.17298	0.0295876	1	0.409626	1	MAP3K14; BCL3; RELB; UGCG; MYC; PRKCZ; IL2RA; NFKB2;
Sphingosine 1-phosphate (S1P) pathway	113	1308	32.659	1.57061	7.5013e-08	0.000125122	9.62475e-06	4.31694e-05	ADRB2; ALDOA; BCL2A1; BCL6; BHLHE40; BIRC3; CMTM2; ERBB2; FGR; FLT1; FOSL1; FOSL2; FPR1; FPR2; HCK; HMGA1; HMOX1; ICAM1; IRF1; ITGAM; ITGB2; JUND; KRT8; SOD2; MAP2K3; LSP1; LYN; MAP3K14; BCL3; MMP9; NFATC2; NRIP1; PEG10; PIM1; PLAUR; PPP1R15A; PRKCI; PTPN1; PTPRE; RALGDS; RELB; RPS6KA5; SIN3A; SLA; SLC11A1; SOCS3; SP1; STAT3; TGFB1; TNFRSF10C; VASP; WASL; ZYX; COL1A2; HSP90B1; LMAN1; LPP; MAF; NT…
Regulation of Androgen receptor activity	8	108	2.31214	1.34813	0.242396	1	1	1	CMTM2; NRIP1; BRCA1; CEBPA; EGR1; FOXO1; JUN; TMPRSS2;
Proteoglycan syndecan-mediated signaling events	113	1342	32.659	1.53082	3.14165e-07	0.000524028	1.31007e-05	5.87599e-05	ADRB2; ALDOA; BCL2A1; BCL6; BHLHE40; CMTM2; ERBB2; FGR; FOSL1; FOSL2; FPR1; FPR2; HCK; HMGA1; HMOX1; ICAM1; IRF1; ITGAM; ITGB2; JUND; KRT8; SOD2; MAP2K3; LSP1; LYN; MAP3K14; BCL3; MMP9; NFATC2; NRIP1; PEG10; PIM1; PLAUR; PPP1R15A; PRKCI; PTPN1; PTPRE; RALGDS; RELB; RPS6KA5; SDC4; SIN3A; SLA; SLC11A1; SOCS3; SP1; STAT3; TGFB1; TNFRSF10C; VASP; WASL; ZYX; COL1A2; HSP90B1; LMAN1; LPP; MAF; NT5E; MEP…
Atypical NF-kappaB pathway	1	14	0.289017	1.31053	0.54749	1	1	1	BCL3;
Calcium signaling in the CD4+ TCR pathway	7	29	2.02312	4.39271	0.000780972	1	0.0178447	0.0800379	FOSL1; NFATC2; FOS; IL2RA; JUN; JUNB; PTGS2;
IL8- and CXCR2-mediated signaling events	6	34	1.7341	3.21241	0.00962954	1	0.169074	0.758341	CXCR2; FGR; HCK; LYN; RAC2; VASP;
Signaling mediated by p38-gamma and p38-delta	1	11	0.289017	1.66762	0.4636	1	1	1	MAP2K3;
BMP receptor signaling	25	226	7.22543	2.01163	0.000598243	0.99787	0.0141494	0.0634635	FGR; FOSL1; HCK; KRT8; MAP2K3; LSP1; LYN; NFATC2; PIM1; PPP1R15A; PTPN1; RPS6KA5; MAF; FOS; PRKCZ; EGR1; EGR3; GADD45B; GADD45G; IL2RA; JUN; JUNB; MAP3K8; NR4A1; PTGS2;
Endogenous TLR signaling	10	57	2.89017	3.19187	0.000946132	1	0.0213263	0.095654	MAP3K14; BCL3; RELB; S100A8; S100A9; TLR1; TLR2; NFKB2; SAA1; VCAN;
Aurora A signaling	5	64	1.44509	1.42283	0.275239	1	1	1	MAP3K14; BCL3; RELB; BRCA1; NFKB2;
RhoA signaling pathway	17	205	4.91329	1.50831	0.0581224	1	0.625472	1	JUND; MAP2K3; NCF1; NCF2; SOCS3; STAT3; RAP1GDS1; FOS; BRCA1; PRKCZ; ATF3; CIT; CYR61; IL6; JUN; JUNB; LIMK2;
Class I PI3K signaling events mediated by Akt	110	1285	31.7919	1.55628	2.04712e-07	0.00034146	1.01767e-05	4.56451e-05	ADRB2; ALDOA; BCL2A1; BCL6; BHLHE40; CMTM2; ERBB2; FGR; FOSL1; FOSL2; FPR1; FPR2; HCK; HMGA1; HMOX1; ICAM1; IRF1; ITGAM; ITGB2; JUND; KRT8; SOD2; MAP2K3; LSP1; LYN; MAP3K14; BCL3; MMP9; NFATC2; NRIP1; PEG10; PIM1; PLAUR; PPP1R15A; PRKCI; PTPN1; PTPRE; RALGDS; RELB; RPS6KA5; SIN3A; SLA; SLC11A1; SOCS3; SP1; STAT3; TGFB1; TNFRSF10C; VASP; WASL; ZYX; COL1A2; HSP90B1; LMAN1; LPP; MAF; NT5E; MEP1B; MY…
LKB1 signaling events	111	1305	32.0809	1.54636	2.47122e-07	0.0004122	1.08044e-05	4.84604e-05	ADRB2; ALDOA; BCL2A1; BCL6; BHLHE40; CMTM2; ERBB2; FGR; FOSL1; FOSL2; FPR1; FPR2; HCK; HMGA1; HMOX1; ICAM1; IRF1; ITGAM; ITGB2; JUND; KRT8; SOD2; MAP2K3; LSP1; LYN; MAP3K14; BCL3; MMP9; NFATC2; NRIP1; PEG10; PIM1; PLAUR; PPP1R15A; PRKCI; PTPN1; PTPRE; RALGDS; RELB; RPS6KA5; SIN3A; SLA; SLC11A1; SOCS3; SP1; STAT3; TGFB1; TNFRSF10C; VASP; WASL; ZYX; COL1A2; HSP90B1; LMAN1; LPP; MAF; NT5E; MEP1B; MY…
Regulation of RhoA activity	17	205	4.91329	1.50831	0.0581224	1	0.625472	1	JUND; MAP2K3; NCF1; NCF2; SOCS3; STAT3; RAP1GDS1; FOS; BRCA1; PRKCZ; ATF3; CIT; CYR61; IL6; JUN; JUNB; LIMK2;
Signaling events mediated by PRL	2	23	0.578035	1.58797	0.363572	1	1	1	CDKN1A; EGR1;
Trk receptor signaling mediated by the MAPK pathway	4	34	1.15607	2.14339	0.114244	1	0.992493	1	MAP2K3; RPS6KA5; FOS; EGR1;
Trk receptor signaling mediated by PI3K and PLC-gamma	4	63	1.15607	1.1569	0.459208	1	1	1	MAP2K3; RPS6KA5; FOS; EGR1;
PLK2 and PLK4 events	1	2	0.289017	9.13457	0.106998	1	0.944302	1	PLK2;
AndrogenReceptor	7	78	2.02312	1.63354	0.13597	1	1	1	NRIP1; PNRC1; SIN3A; SP1; STAT3; BRCA1; JUN;
Wnt	2	82	0.578035	0.445545	0.945299	1	1	1	FZD7; MAP1B;
KitReceptor	7	54	2.02312	2.35943	0.0273386	1	0.386447	1	CSF2RB; FGR; HCK; LYN; GRAP; CISH; SOCS1;
Hedgehog	1	16	0.289017	1.14681	0.596013	1	1	1	SIN3A;
Alpha6Beta4Integrin	1	48	0.289017	0.38243	0.934537	1	1	1	ERBB2;
TNF alpha/NF-kB	9	171	2.60116	0.95778	0.60395	1	1	1	BIRC3; CASP7; MAP3K14; RELB; TRAF4; PRKCZ; MAP3K8; NFKB2; NFKBIZ;
TGFBR	13	125	3.75723	1.89189	0.0193945	1	0.291378	1	CD44; JUND; SP1; TGFB1; MYC; FOSB; FOS; ATF3; CDKN1A; FOXO1; JUN; JUNB; TGFB3;
ID	1	14	0.289017	1.31053	0.54749	1	1	1	ATF3;
EGFR1	19	138	5.49133	2.504	0.0001762	0.293902	0.00459223	0.0205973	JUND; KRT8; MAP3K14; PRKCI; SOCS3; SP1; STAT3; WASL; MYC; FOS; CEBPA; PRKCZ; ELF3; FOXO1; JUN; KLF11; PLSCR1; RGS16; SOCS1;
NOTCH	2	57	0.578035	0.640926	0.82963	1	1	1	SIN3A; STAT3;
Mesenchymal-to-epithelial transition	22	223	6.35838	1.79415	0.00529616	1	0.102721	0.460729	ALOX5; DTX4; ERBB2; IL1RN; KRT8; RAB11FIP1; RAB20; S100P; SDC4; TOB1; TSPAN8; GDF15; ANXA9; EPHA1; RAPGEFL1; ELF3; GPRC5A; KCNK1; KLF5; LCN2; TACSTD2; TMPRSS2;
Epithelial-to-mesenchymal transition	26	185	7.51445	2.55569	7.83008e-06	0.0130606	0.000251165	0.00112654	AKAP12; CSF2RB; EMP3; PLXNC1; SLC2A3; CLIC4; EFEMP1; FLRT2; MAF; CCL2; CRISPLD2; CXCR4; DPYSL3; GEM; GFPT2; GPM6B; MAP1B; PMP22; PTX3; RGS2; SERPINE1; SRGN; TAGLN; TMEM158; TUBB6; VCAN;

## Sheet: Protein domain
Analysis: Protein domain
Dataset name: SH
Protein domain	No. of genes in the dataset	No. of genes in the background dataset	Percentage of genes	Fold enrichment	P-value (Hypergeometric test)	Bonferroni method	BH method	Q-value (Storey-Tibshirani method)	genes mapped (from input data set)
coiled coil region	87	2968	14.3328	0.717046	0.99991	1	1	1	BAZ1A; CDC42BPA; CECR2; CORO1A; DNMBP; EFHD2; FAM107A; FAM129A; FAM65B; FOSL1; G0S2; GATAD2A; HIVEP1; HSPA6; ITPRIP; KCNJ15; KRT8; LMNB1; PEG10; RASSF5; STAT3; TLE3; TRAF4; VASP; VNN2; CANX; HSP90B1; LMAN1; LPP; MTMR4; WNK3; ALPK2; FOSB; ACBD5; AMOT; ANKS4B; BRCA1; C14orf80; CCDC121; CCDC150; CENPQ; ESPNL; FAM13A; FAM47E; FEZ1; GCK; HEXIM2; JAKMIP2; KANK4; KIF22; KRT222; LAMA4; NINL; ORAI3; PKD2;…
UBCc	1	42	0.164745	0.588047	0.82721	1	1	1	UBE2QL1;
signal peptide	184	3668	30.313	1.22703	0.000787153	0.763539	0.152708	0.772472	ACVR2B; ADGRG3; CCL4; CD44; CD52; CD55; CD83; CD93; CDHR2; CELSR2; CETP; CFP; CNDP1; CR1; CSF2RB; CSF3R; CST7; CXCL1; CXCL3; DEFA1B; DEFA3; DEFA1; DPEP2; ERBB2; F2RL1; FCGR2A; FCGR3B; FCN1; FLT1; HAVCR2; HLA-DPA1; ICAM1; IL17RA; IL18RAP; IL1RN; ITGAM; ITGB2; LILRB2; LST1; LYZ; METRNL; MGAM; MMP19; MMP25; MMP9; MPEG1; PECAM1; PILRA; PLAUR; PLBD1; PLXNC1; PRAP1; PROK2; PTPRE; QPCT; SDC4; SLC11A1; S…
transmembrane domain	221	4771	36.4086	1.13304	0.0125476	1	0.630937	1	ACVR2B; ADGRG3; ADRB2; ALOX5AP; AVPR1A; C16orf54; C5AR1; CCR1; CD44; CD52; CD83; CD93; CDHR2; CELSR2; CHIC2; CLEC4E; CLEC7A; CLPTM1; CMTM2; CR1; CSF2RB; CSF3R; CXCR2; DGAT2; DHODH; EMP1; EMP3; ERBB2; ERGIC1; EVI2B; F2RL1; FADS2; FCAMR; FCER1G; FCGR2A; FCGR3B; FPR1; FPR2; G0S2; GPR160; GPR27; HAVCR2; HCAR3; HLA-DPA1; HMOX1; ICAM1; IL17RA; IL18RAP; IL1R2; INAFM1; ITGAM; ITGB2; KCNJ15; LAPTM5; LILRB…
TPR	3	93	0.494234	0.791553	0.738415	1	1	1	NCF2; IFIT2; LONRF2;
RhoGAP	3	65	0.494234	1.13248	0.499633	1	1	1	ARHGAP30; TAGAP; FAM13A;
IG	30	340	4.94234	2.15883	6.4725e-05	0.0627832	0.0253232	0.128097	CD83; FCAMR; FCGR2A; FCGR3B; FLT1; HAVCR2; ICAM1; IL18RAP; IL1R2; LILRB2; PECAM1; PILRA; TIE1; TIMD4; TREM1; CNTN3; ALPK2; CD160; LRIG3; CD274; FCAR; FCGR1A; IL1RL1; KIR2DL3; MCAM; MYBPH; MYOM1; SIGLEC14; SIRPA; VCAN;
GRAM	1	16	0.164745	1.54303	0.487386	1	1	1	GRAMD4;
PTPc_DSPc	1	16	0.164745	1.54303	0.487386	1	1	1	PTPN1;
H15	2	13	0.329489	3.77887	0.0966606	1	1	1	HIST1H1A; HIST1H1E;
ZnF_U1	1	26	0.164745	0.949783	0.66252	1	1	1	ZNF385B;
ZnF_C2H2	19	799	3.13015	0.581933	0.997329	1	1	1	BCL6; HIVEP1; CREB5; SP1; ZBTB21; ZBTB43; ZNF217; KLF3; ZNF385B; ZNF652; ZFP1; EGR1; EGR3; KLF11; KLF4; KLF5; KLF6; WT1; ZNF878;
CA	5	114	0.823723	1.07483	0.501129	1	1	1	CDHR2; CELSR2; CDH15; PCDH18; CDH19;
TBC	1	50	0.164745	0.493978	0.876396	1	1	1	TBC1D2;
EFh	5	144	0.823723	0.850919	0.706309	1	1	1	EFHD2; GCA; PPP3R1; MYL6B; NINL;
S_TKc	15	307	2.47117	1.19584	0.275414	1	1	1	CDC42BPA; MAP2K3; LRRK2; MAP3K14; PIM1; PIM3; PLK2; PRKCI; RPS6KA5; WNK3; PRKCZ; CIT; MAPK4; SIK1; TNIK;
BRCT	1	22	0.164745	1.12239	0.601085	1	1	1	BRCA1;
ZnMc	5	29	0.823723	4.22409	0.00590615	1	0.440641	1	MMP19; MMP25; MMP9; MEP1B; MMP10;
HX	4	23	0.658979	4.26256	0.0131865	1	0.630937	1	MMP19; MMP25; MMP9; MMP10;
DEXDc	1	112	0.164745	0.22055	0.990842	1	1	1	EIF4A2;
HELICc	1	111	0.164745	0.222537	0.990449	1	1	1	EIF4A2;
AT_hook	2	28	0.329489	1.7552	0.318418	1	1	1	HMGA1; ELF3;
RRM	3	221	0.494234	0.333118	0.994853	1	1	1	PPRC1; TIA1; RBPMS;
Sema	1	30	0.164745	0.823187	0.714507	1	1	1	SEMA4B;
PSI	3	44	0.494234	1.67285	0.267802	1	1	1	ITGB2; PLXNC1; SEMA4B;
IPT	4	27	0.658979	3.63131	0.0229908	1	0.796466	1	NFATC2; PLXNC1; RELB; NFKB2;
RING	12	311	1.97694	0.944521	0.622991	1	1	1	BAZ1A; BIRC3; DTX4; RNF19B; TRAF4; FANCL; BRCA1; CYHR1; RNF43; TRIM55; LONRF2; TRIM15;
BAR	1	13	0.164745	1.89884	0.418929	1	1	1	DNMBP;
SH3	10	216	1.64745	1.13345	0.389622	1	1	1	DNMBP; FGR; HCK; LYN; MYO1F; NCF1; NCF2; NCF4; SLA; GRAP;
CH	6	66	0.988468	2.22694	0.0523473	1	1	1	TAGLN2; ASPM; CNN1; SPTBN1; SYNE2; TAGLN;
SPEC	2	32	0.329489	1.53587	0.378468	1	1	1	SPTBN1; SYNE2;
LRRNT	5	99	0.823723	1.23766	0.38061	1	1	1	FLRT2; LGI1; LRIG3; LRRN3; SLITRK3;
LRR	12	233	1.97694	1.2607	0.246131	1	1	1	LRRK2; TLR1; TLR2; TLR8; FLRT2; ELFN1; LGI1; LRIG3; LRRC19; LRRC31; LRRN3; SLITRK3;
LRR_TYP	8	132	1.31796	1.48412	0.172993	1	1	1	LRRK2; TLR2; TLR8; FLRT2; LGI1; LRIG3; LRRN3; SLITRK3;
LRRCT	10	90	1.64745	2.72011	0.00365728	1	0.354756	1	TLR1; TLR2; TLR8; FLRT2; ELFN1; LGI1; LRIG3; LRRC19; LRRN3; SLITRK3;
IGc2	14	211	2.30643	1.62397	0.0514806	1	1	1	FLT1; CNTN3; PTPRS; NCAM2; ALPK2; LRIG3; LRRN3; FCGR1A; IL1RL1; MCAM; MYBPH; MYOM1; NRG1; SIGLEC14;
IG_like	13	128	2.14168	2.48586	0.00223376	1	0.24075	1	FLT1; ICAM1; PECAM1; SIGIRR; TIE1; CD274; FCAR; IL1RL1; KIR2DL3; MCAM; MYOM1; PVR; SIGLEC14;
4.1m	1	14	0.164745	1.7633	0.442706	1	1	1	SDC4;
ANK	8	249	1.31796	0.78679	0.803479	1	1	1	BCL3; RIPK4; ANKS4B; BTBD11; ESPNL; KANK4; NFKB2; NFKBIZ;
FN3	17	187	2.80066	2.22476	0.00174357	1	0.24075	1	CSF2RB; CSF3R; TIE1; CNTN3; FLRT2; PTPRS; NCAM2; ELFN1; EPHA1; LRRN3; EPHA2; IL4R; LEPR; MYBPH; MYOM1; OSMR; PHYHIPL;
BTB	7	179	1.15321	0.95782	0.601569	1	1	1	BCL6; ZBTB21; ZBTB43; BTBD11; KBTBD3; BACH2; IVNS1ABP;
FERM_C	1	27	0.164745	0.914618	0.676342	1	1	1	FRMD6;
KRAB	5	376	0.823723	0.325898	0.99952	1	1	1	ZFP1; SSX1; SSX2; SSX4B; ZNF878;
HLH	5	116	0.823723	1.0563	0.516593	1	1	1	BHLHE40; MLXIP; MXD1; MYC; ASCL2;
ZnF_C4	4	46	0.658979	2.13175	0.117695	1	1	1	RORC; NR4A1; NR4A2; NR4A3;
HOLI	4	48	0.658979	2.04294	0.131953	1	1	1	RORC; NR4A1; NR4A2; NR4A3;
WD40	5	269	0.823723	0.455525	0.986906	1	1	1	CORO1A; LRRK2; TLE3; WDR72; LYST;
RGS	3	35	0.494234	2.10289	0.170863	1	1	1	RGS1; RGS16; RGS2;
TBOX	2	17	0.329489	2.89025	0.151703	1	1	1	TBX10; TBX3;
CSP	2	9	0.329489	5.4565	0.0496432	1	1	1	YBX3; LIN28B;
EGF	14	208	2.30643	1.64739	0.0466757	1	1	1	CD93; CELSR2; SELL; TIE1; MEP1B; TDGF1; HBEGF; LDLR; MUC17; NRG1; PTGS2; THBD; THBS1; VCAN;
EGF_like	4	87	0.658979	1.12725	0.478405	1	1	1	TIE1; EFEMP1; LAMC2; MUC17;
FYVE	2	33	0.329489	1.48934	0.39315	1	1	1	MTMR4; ZFYVE27;
Cation_ATPase_N	1	18	0.164745	1.37167	0.528489	1	1	1	ATP2B4;
VWA	2	84	0.329489	0.585205	0.863311	1	1	1	ITGAM; ITGB2;
SANT	1	49	0.164745	0.504057	0.871109	1	1	1	ELMSAN1;
FN2	1	14	0.164745	1.7633	0.442706	1	1	1	MMP9;
Tryp_SPc	4	115	0.658979	0.852809	0.69719	1	1	1	TPSAB1; TPSB2; PRSS3; TMPRSS2;
UBQ	1	45	0.164745	0.548852	0.847605	1	1	1	MIDN;
EGF_CA	6	98	0.988468	1.49985	0.212056	1	1	1	CD93; CELSR2; EFEMP1; LDLR; THBD; VCAN;
VWC	2	38	0.329489	1.29343	0.463959	1	1	1	CYR61; THBS1;
ANX	3	13	0.494234	5.6589	0.0143099	1	0.630937	1	ANXA1; ANXA9; ANXA2;
AAA	2	145	0.329489	0.339032	0.983472	1	1	1	ABCB11; ABCC6;
Zn_pept	3	21	0.494234	3.50416	0.0523123	1	1	1	CPD; AGBL5; CPB2;
SPRY	2	77	0.329489	0.638399	0.828652	1	1	1	SPSB1; TRIM15;
CCP	7	55	1.15321	3.11688	0.00681404	1	0.440641	1	CD55; CR1; SELL; IL15RA; IL2RA; PAPPA; VCAN;
IQ	3	84	0.494234	0.876352	0.673273	1	1	1	MYO1F; ASPM; MYH11;
HOX	8	234	1.31796	0.837223	0.745731	1	1	1	HMBOX1; MEIS2; HOPX; ONECUT1; DUX3; DUX5; MSX1; PRRX1;
PDZ	4	150	0.658979	0.653834	0.866948	1	1	1	LIN7B; LIMK2; PDLIM3; SIPA1L2;
FH	2	48	0.329489	1.02402	0.589686	1	1	1	FOXC1; FOXO1;
B41	1	51	0.164745	0.484294	0.881466	1	1	1	FRMD6;
RAB	3	64	0.494234	1.15017	0.489253	1	1	1	RAB26; RAB5C; RAB27A;
PH	9	278	1.4827	0.792698	0.807007	1	1	1	CDC42BPA; DOK3; PLEK; PLEKHO2; TBC1D2; CIT; IRS2; PHLDA1; SPTBN1;
Arrestin_C	2	10	0.329489	4.9114	0.0604094	1	1	1	ARRDC3; ARRDC4;
HDc	2	24	0.329489	2.04761	0.25711	1	1	1	PDE11A; PDE4B;
S_TK_X	5	56	0.823723	2.18784	0.077983	1	1	1	CDC42BPA; PRKCI; RPS6KA5; PRKCZ; CIT;
BBOX	2	72	0.329489	0.682726	0.799243	1	1	1	TRIM55; TRIM15;
PRY	1	53	0.164745	0.466022	0.890993	1	1	1	TRIM15;
C2	3	138	0.494234	0.533457	0.925159	1	1	1	RAB11FIP1; SYT12; SYT17;
Gal-bind_lectin	2	16	0.329489	3.07077	0.137402	1	1	1	CLC; LGALS4;
GLECT	2	16	0.329489	3.07077	0.137402	1	1	1	CLC; LGALS4;
Kelch	2	58	0.329489	0.847493	0.692157	1	1	1	KBTBD3; IVNS1ABP;
BCL	1	12	0.164745	2.05694	0.394139	1	1	1	BCL2A1;
TLC	1	17	0.164745	1.45231	0.508366	1	1	1	TRAM1;
HATPase_c	1	18	0.164745	1.37167	0.528489	1	1	1	HSP90B1;
LIM	4	73	0.658979	1.3434	0.349159	1	1	1	ZYX; LPP; LIMK2; PDLIM3;
ACTIN	1	31	0.164745	0.796641	0.726203	1	1	1	ACTG2;
SEC14	2	26	0.329489	1.89016	0.287838	1	1	1	SEC14L1; SEC14L3;
PD	1	8	0.164745	3.08413	0.283963	1	1	1	MGAM;
PYRIN	1	22	0.164745	1.12239	0.601085	1	1	1	MNDA;
DnaJ	1	50	0.164745	0.493978	0.876396	1	1	1	SEC63;
SH2	11	111	1.81219	2.42587	0.0057016	1	0.440641	1	FGR; HCK; LYN; SLA; SOCS3; STAT3; GRAP; SHD; CISH; SOCS1; SOCS2;
TyrKc	8	88	1.31796	2.22609	0.0273296	1	0.914129	1	ERBB2; FGR; FLT1; HCK; LYN; TIE1; EPHA1; EPHA2;
PTPc	3	37	0.494234	1.98926	0.191541	1	1	1	PTPN1; PTPRE; PTPRS;
PWWP	1	19	0.164745	1.29952	0.547789	1	1	1	MUM1;
LINK	3	14	0.494234	5.25499	0.0176686	1	0.714104	1	CD44; TNFAIP6; VCAN;
Glyco_18	1	7	0.164745	3.52409	0.253426	1	1	1	CHI3L1;
S4	1	5	0.164745	4.93091	0.188396	1	1	1	RPS4Y1;
JmjC	1	33	0.164745	0.748375	0.748178	1	1	1	KDM6B;
CUB	1	49	0.164745	0.504057	0.871109	1	1	1	TNFAIP6;
PTX	2	7	0.329489	7.01328	0.0305659	1	0.956418	1	NPTX2; PTX3;
GPS	2	33	0.329489	1.48934	0.39315	1	1	1	ADGRG3; CELSR2;
DEP	1	21	0.164745	1.17581	0.584056	1	1	1	PLEK;
INB	1	8	0.164745	3.08413	0.283963	1	1	1	ITGB2;
Integrin_B_tail	1	7	0.164745	3.52409	0.253426	1	1	1	ITGB2;
TIR	6	19	0.988468	7.73278	7.8319e-05	0.0759695	0.0253232	0.128097	IL18RAP; SIGIRR; TLR1; TLR2; TLR8; IL1RL1;
CHROMO	1	34	0.164745	0.72637	0.758497	1	1	1	CBX5;
FRI	1	19	0.164745	1.29952	0.547789	1	1	1	FZD7;
Frizzled	1	11	0.164745	2.24376	0.368293	1	1	1	FZD7;
PB1	4	14	0.658979	7.00083	0.00199488	1	0.24075	1	NCF2; NCF4; PRKCI; PRKCZ;
Alpha_kinase	1	7	0.164745	3.52409	0.253426	1	1	1	ALPK2;
STYKc	3	48	0.494234	1.53348	0.312862	1	1	1	RPS6KA5; IRAK3; LIMK2;
TSP1	6	64	0.988468	2.29652	0.0461911	1	1	1	CFP; ISM1; ADAMTS1; ADAMTS4; CYR61; THBS1;
DEATH	2	27	0.329489	1.82018	0.303158	1	1	1	IRAK3; NFKB2;
ARM	1	29	0.164745	0.851563	0.702313	1	1	1	RAP1GDS1;
PHD	1	92	0.164745	0.268491	0.978772	1	1	1	BAZ1A;
L27	1	13	0.164745	1.89884	0.418929	1	1	1	LIN7B;
P4Hc	1	16	0.164745	1.54303	0.487386	1	1	1	P4HA1;
DYNc	1	7	0.164745	3.52409	0.253426	1	1	1	MX2;
GED	1	6	0.164745	4.11046	0.221589	1	1	1	MX2;
BRLZ	18	52	2.9654	8.46974	9.24911e-13	8.97164e-10	8.97164e-10	4.5383e-09	FOSL1; FOSL2; JUND; CREB5; NFIL3; MAF; FOSB; FOS; CEBPA; DBP; TEF; ATF3; BACH2; CEBPD; JUN; JUNB; MAFF; NFE2;
acidPPc	1	18	0.164745	1.37167	0.528489	1	1	1	PPAP2B;
SAM	5	92	0.823723	1.33182	0.323464	1	1	1	ANKS4B; EPHA1; SAMD3; EPHA2; PHC2;
CT	1	21	0.164745	1.17581	0.584056	1	1	1	CYR61;
PX	2	45	0.329489	1.09227	0.554377	1	1	1	NCF1; NCF4;
WH2	1	14	0.164745	1.7633	0.442706	1	1	1	WASL;
ZnF_C2HC	3	42	0.494234	1.7525	0.245553	1	1	1	PEG10; LIN28B; XRN2;
IGc1	3	41	0.494234	1.79523	0.234541	1	1	1	HLA-DPA1; HLA-DQA1; SIRPA;
TGFB	3	38	0.494234	1.93692	0.202106	1	1	1	TGFB1; GDF15; TGFB3;
TSPN	1	26	0.164745	0.949783	0.66252	1	1	1	THBS1;
KAZAL	1	47	0.164745	0.525502	0.859848	1	1	1	FSTL3;
ZnF_C3H1	4	44	0.658979	2.22862	0.104155	1	1	1	ZFP36L2; ZGPAT; MBNL2; ZFP36;
BEN	1	9	0.164745	2.74183	0.313253	1	1	1	BEND3;
BACK	2	61	0.329489	0.80582	0.718478	1	1	1	KBTBD3; IVNS1ABP;
CLECT	7	86	1.15321	1.99348	0.0619362	1	1	1	CD93; CLEC4E; CLEC7A; SELL; OLR1; THBD; VCAN;
WNT1	2	19	0.329489	2.58617	0.181079	1	1	1	WNT11; WNT5A;
small_GTPase	2	35	0.329489	1.40426	0.422026	1	1	1	LRRK2; RASD1;
DUF1899	1	8	0.164745	3.08413	0.283963	1	1	1	CORO1A;
DUF1900	1	8	0.164745	3.08413	0.283963	1	1	1	CORO1A;
C1	5	67	0.823723	1.82869	0.13849	1	1	1	CDC42BPA; PRKCI; RASSF5; PRKCZ; CIT;
DAGKc	1	15	0.164745	1.64583	0.465512	1	1	1	SPHK2;
DUF4206	1	5	0.164745	4.93091	0.188396	1	1	1	KIAA0226L;
JAB_MPN	1	12	0.164745	2.05694	0.394139	1	1	1	MPND;
RA	3	31	0.494234	2.37415	0.131725	1	1	1	RALGDS; RASSF2; RASSF5;
MYSc	2	38	0.329489	1.29343	0.463959	1	1	1	MYO1F; MYH11;
CARD	2	17	0.329489	2.89025	0.151703	1	1	1	BIRC3; CASP4;
CASc	2	14	0.329489	3.50914	0.109826	1	1	1	CASP7; CASP4;
RhoGEF	1	67	0.164745	0.368659	0.939381	1	1	1	DNMBP;
LDLa	3	47	0.494234	1.5661	0.301555	1	1	1	MAMDC4; LDLR; TMPRSS2;
SR	1	26	0.164745	0.949783	0.66252	1	1	1	TMPRSS2;
MAM	2	17	0.329489	2.89025	0.151703	1	1	1	MAMDC4; MEP1B;
MATH	2	12	0.329489	4.09351	0.0839912	1	1	1	TRAF4; MEP1B;
LITAF	1	2	0.164745	12.2905	0.0800985	1	1	1	LITAF;
RasGEFN	1	21	0.164745	1.17581	0.584056	1	1	1	RALGDS;
RasGEF	2	29	0.329489	1.69469	0.333597	1	1	1	RALGDS; RAPGEFL1;
TNFR	3	26	0.494234	2.83054	0.088189	1	1	1	CELSR2; TNFRSF10C; TNFRSF10D;
TNF	1	18	0.164745	1.37167	0.528489	1	1	1	TNFSF14;
HormR	1	26	0.164745	0.949783	0.66252	1	1	1	CELSR2;
IGv	1	20	0.164745	1.23457	0.566301	1	1	1	PVR;
H4	2	15	0.329489	3.27536	0.123426	1	1	1	HIST1H4B; HIST1H4E;
SCY	8	44	1.31796	4.45168	0.00035877	0.348007	0.0870018	0.440099	CCL4; CXCL1; CXCL3; CCL14; CCL2; CCL20; CCL3; CXCL6;
Cyt-b5	2	14	0.329489	3.50914	0.109826	1	1	1	FADS2; FADS1;
Tubulin	1	23	0.164745	1.07361	0.617419	1	1	1	TUBB6;
Tubulin_C	1	22	0.164745	1.12239	0.601085	1	1	1	TUBB6;
TEA	1	4	0.164745	6.16056	0.153791	1	1	1	TEAD4;
EGF_Lam	3	33	0.494234	2.2303	0.150885	1	1	1	CELSR2; LAMA4; LAMC2;
HhH1	1	7	0.164745	3.52409	0.253426	1	1	1	KIF22;
WWE	1	5	0.164745	4.93091	0.188396	1	1	1	DTX4;
PGAM	1	10	0.164745	2.46792	0.341347	1	1	1	PFKFB3;
LU	1	17	0.164745	1.45231	0.508366	1	1	1	PLAUR;
SERPIN	5	35	0.823723	3.50017	0.0132115	1	0.630937	1	SERPINB9; SERPINA1; SERPINB2; SERPINB8; SERPINE1;
ETS	3	28	0.494234	2.62843	0.104782	1	1	1	ELF3; ETS2; ETV7;
PBD	3	14	0.494234	5.25499	0.0176686	1	0.714104	1	CDC42BPA; CDC42EP3; WASL;
DISIN	1	21	0.164745	1.17581	0.584056	1	1	1	ADAM19;
ACR	2	23	0.329489	2.1366	0.241753	1	1	1	ADAM19; ADAMTS1;
CNH	3	13	0.494234	5.6589	0.0143099	1	0.630937	1	CDC42BPA; CIT; TNIK;
G_patch	2	23	0.329489	2.1366	0.241753	1	1	1	SOX7; ZGPAT;
BBC	1	19	0.164745	1.29952	0.547789	1	1	1	TRIM55;
RHO	2	20	0.329489	2.45693	0.196066	1	1	1	RAC2; RND1;
G_alpha	1	16	0.164745	1.54303	0.487386	1	1	1	GNAO1;
GAF	1	8	0.164745	3.08413	0.283963	1	1	1	PDE11A;
SAM_PNT	3	13	0.494234	5.6589	0.0143099	1	0.630937	1	ELF3; ETS2; ETV7;
LamG	2	44	0.329489	1.11709	0.542138	1	1	1	CELSR2; LAMA4;
Mab-21	2	12	0.329489	4.09351	0.0839912	1	1	1	ITPRIP; C2orf54;
PlsC	3	18	0.494234	4.08786	0.0351081	1	1	1	LPGAT1; GPAM; AGPAT9;
HMG	1	51	0.164745	0.484294	0.881466	1	1	1	SOX17;
PQQ	1	6	0.164745	4.11046	0.221589	1	1	1	ERN1;
SOCS_box	5	38	0.823723	3.22391	0.0184888	1	0.717365	1	SOCS3; SPSB1; CISH; SOCS1; SOCS2;
SOCS	4	22	0.658979	4.45623	0.0112494	1	0.630937	1	SOCS3; CISH; SOCS1; SOCS2;
ADF	2	10	0.329489	4.9114	0.0604094	1	1	1	COTL1; TWF1;
GDNF	1	6	0.164745	4.11046	0.221589	1	1	1	GFRA3;
CRAL_TRIO_N	2	12	0.329489	4.09351	0.0839912	1	1	1	SEC14L1; SEC14L3;
BROMO	2	43	0.329489	1.14306	0.529669	1	1	1	BAZ1A; CECR2;
Sec63	1	4	0.164745	6.16056	0.153791	1	1	1	SEC63;
H3	1	18	0.164745	1.37167	0.528489	1	1	1	HIST1H3C;
Lig_chan-Glu_bd	2	18	0.329489	2.72977	0.166277	1	1	1	GRID1; GRIA3;
PBPe	2	18	0.329489	2.72977	0.166277	1	1	1	GRID1; GRIA3;
LY	1	15	0.164745	1.64583	0.465512	1	1	1	LDLR;
PTBI	2	12	0.329489	4.09351	0.0839912	1	1	1	DOK3; IRS2;
IRS	2	14	0.329489	3.50914	0.109826	1	1	1	DOK3; IRS2;
ELM2	1	13	0.164745	1.89884	0.418929	1	1	1	ELMSAN1;
EPH_lbd	2	14	0.329489	3.50914	0.109826	1	1	1	EPHA1; EPHA2;
DEFSN	3	9	0.494234	8.17118	0.00474822	1	0.418707	1	DEFA1B; DEFA3; DEFA1;
KISc	1	44	0.164745	0.561323	0.841089	1	1	1	KIF22;
FGF	1	22	0.164745	1.12239	0.601085	1	1	1	FGF14;
FU	1	18	0.164745	1.37167	0.528489	1	1	1	ERBB2;
Beach	1	9	0.164745	2.74183	0.313253	1	1	1	LYST;
IBR	1	15	0.164745	1.64583	0.465512	1	1	1	RNF19B;
SCP	2	15	0.329489	3.27536	0.123426	1	1	1	GLIPR2; CRISPLD2;
IL10	1	5	0.164745	4.93091	0.188396	1	1	1	IL24;
FOLN	1	11	0.164745	2.24376	0.368293	1	1	1	FSTL3;
SEA	1	14	0.164745	1.7633	0.442706	1	1	1	MUC17;
MHC_II_alpha	2	6	0.329489	8.18022	0.0224339	1	0.796466	1	HLA-DPA1; HLA-DQA1;
UBA	1	32	0.164745	0.771754	0.73742	1	1	1	SIK1;
LYZ1	1	9	0.164745	2.74183	0.313253	1	1	1	LYZ;
TY	3	17	0.494234	4.32818	0.0301492	1	0.956418	1	IGFBP2; IGFBP1; TACSTD2;
RAS	1	23	0.164745	1.07361	0.617419	1	1	1	RASD1;
COLFI	1	11	0.164745	2.24376	0.368293	1	1	1	COL1A2;
Longin	1	5	0.164745	4.93091	0.188396	1	1	1	SEC22B;
TGc	1	11	0.164745	2.24376	0.368293	1	1	1	TGM2;
SAA	1	4	0.164745	6.16056	0.153791	1	1	1	SAA1;
ZnF_GATA	1	12	0.164745	2.05694	0.394139	1	1	1	GATA4;
Enolase_N	1	4	0.164745	6.16056	0.153791	1	1	1	ENO3;
Enolase_C	1	4	0.164745	6.16056	0.153791	1	1	1	ENO3;
NL	1	7	0.164745	3.52409	0.253426	1	1	1	PAPPA;
ARF	1	21	0.164745	1.17581	0.584056	1	1	1	ARL14;
CY	2	17	0.329489	2.89025	0.151703	1	1	1	CST7; CSTA;
Int_alpha	1	19	0.164745	1.29952	0.547789	1	1	1	ITGAM;
FBG	2	29	0.329489	1.69469	0.333597	1	1	1	FCN1; ITLN2;
btg1	2	6	0.329489	8.18022	0.0224339	1	0.796466	1	TOB1; BTG2;
ORANGE	1	10	0.164745	2.46792	0.341347	1	1	1	BHLHE40;
H2A	2	27	0.329489	1.82018	0.303158	1	1	1	HIST2H2AB; HIST2H2AC;
BIR	1	8	0.164745	3.08413	0.283963	1	1	1	BIRC3;
FBA	1	6	0.164745	4.11046	0.221589	1	1	1	FBXO2;
DDT	1	5	0.164745	4.93091	0.188396	1	1	1	BAZ1A;
BPI1	1	9	0.164745	2.74183	0.313253	1	1	1	CETP;
IB	3	18	0.494234	4.08786	0.0351081	1	1	1	IGFBP2; IGFBP1; CYR61;
TLDc	1	5	0.164745	4.93091	0.188396	1	1	1	NCOA7;
BPI2	1	9	0.164745	2.74183	0.313253	1	1	1	CETP;
zf-3CxxC	2	8	0.329489	6.13771	0.0396666	1	1	1	RTP3; RTP4;
BRIGHT	1	15	0.164745	1.64583	0.465512	1	1	1	ARID5B;
ARID	1	15	0.164745	1.64583	0.465512	1	1	1	ARID5B;
MACPF	1	12	0.164745	2.05694	0.394139	1	1	1	MPEG1;
WH1	3	10	0.494234	7.35488	0.00657876	1	0.440641	1	VASP; WASL; HOMER1;
CENPB	1	13	0.164745	1.89884	0.418929	1	1	1	TIGD2;
KASH	1	3	0.164745	8.20726	0.117713	1	1	1	SYNE2;
EMP24_GP25L	1	11	0.164745	2.24376	0.368293	1	1	1	TMED2;
LamB	1	7	0.164745	3.52409	0.253426	1	1	1	LAMC2;
DM	1	7	0.164745	3.52409	0.253426	1	1	1	DMRTA1;
ENDO3c	1	3	0.164745	8.20726	0.117713	1	1	1	OGG1;
H2B	1	21	0.164745	1.17581	0.584056	1	1	1	HIST1H2BF;
LysM	1	6	0.164745	4.11046	0.221589	1	1	1	NCOA7;
LCCL	1	5	0.164745	4.93091	0.188396	1	1	1	CRISPLD2;
CADG	1	3	0.164745	8.20726	0.117713	1	1	1	SGCE;
PLP	1	3	0.164745	8.20726	0.117713	1	1	1	GPM6B;
ChSh	1	3	0.164745	8.20726	0.117713	1	1	1	CBX5;
ALBUMIN	1	4	0.164745	6.16056	0.153791	1	1	1	AFP;
LH2	2	16	0.329489	3.07077	0.137402	1	1	1	ALOX5; PNLIP;
STAT_int	1	7	0.164745	3.52409	0.253426	1	1	1	STAT3;
IRF	1	9	0.164745	2.74183	0.313253	1	1	1	IRF1;
DUF1856	1	2	0.164745	12.2905	0.0800985	1	1	1	AVPR1A;
IL1	2	10	0.329489	4.9114	0.0604094	1	1	1	IL1RN; IL1B;
Brix	1	6	0.164745	4.11046	0.221589	1	1	1	PPAN;
IL6	2	2	0.329489	24.4593	0.00166883	1	0.24075	1	CSF3; IL6;
ZM	1	3	0.164745	8.20726	0.117713	1	1	1	PDLIM3;
PKS_ER	1	1	0.164745	24.4593	0.0408837	1	1	1	FASN;
PKS_KR	1	1	0.164745	24.4593	0.0408837	1	1	1	FASN;
PUG	1	5	0.164745	4.93091	0.188396	1	1	1	ERN1;
CALCITONIN	1	3	0.164745	8.20726	0.117713	1	1	1	CALCA;
VPS10	1	5	0.164745	4.93091	0.188396	1	1	1	SORT1;
LIF_OSM	1	2	0.164745	12.2905	0.0800985	1	1	1	LIF;
CUT	1	7	0.164745	3.52409	0.253426	1	1	1	ONECUT1;
AMOP	1	4	0.164745	6.16056	0.153791	1	1	1	ISM1;
HDAC_interact	1	2	0.164745	12.2905	0.0800985	1	1	1	SIN3A;
CoA_trans	1	2	0.164745	12.2905	0.0800985	1	1	1	OXCT2;
FANCL_C	1	1	0.164745	24.4593	0.0408837	1	1	1	FANCL;
Integrin_b_cyt	1	6	0.164745	4.11046	0.221589	1	1	1	ITGB2;
Adenylsucc_synt	1	2	0.164745	12.2905	0.0800985	1	1	1	ADSSL1;
LamGL	1	3	0.164745	8.20726	0.117713	1	1	1	PAPPA;

## Sheet: Site of expression
Analysis: Site of expression
Dataset name: SH
Site of expression	No. of genes in the dataset	No. of genes in the background dataset	Percentage of genes	Fold enrichment	P-value (Hypergeometric test)	Bonferroni method	BH method	Q-value (Storey-Tibshirani method)	genes mapped (from input data set)
T cells	84	1726	11.6022	1.23005	0.0267696	1	0.130463	0.423685	ALDOA; ANXA1; BAZ1A; BCL2A1; BCL6; CCL4; CD44; CD52; CFP; CORO1A; COTL1; CR1; CSF3R; CST7; GATAD2A; GCA; HLA-DPA1; HMGA1; ICAM1; IL18RAP; IL1R2; IL1RN; ITGB2; LMNB1; SOD2; LSP1; LYN; MX2; NFATC2; NFIL3; PNRC1; PPP1R18; R3HDM4; RAC2; RELB; S100A11; S100A4; S100A6; S100A8; S100A9; SERPINB9; SIN3A; SLA; SP1; TAGLN2; VASP; CANX; HSP90B1; MAF; EIF4A2; NT5E; SEC22B; TIA1; BRCA1; GRIA3; HIST1H1E; HIST1H…
Monocyte	121	2842	16.7127	1.07605	0.198929	1	0.553088	1	ALDOA; ALOX5; ALOX5AP; ANXA1; ARHGAP30; BASP1; CD44; CD55; CFP; CLC; CNDP1; CORO1A; COTL1; DEFA1B; DEFA1; EFHD2; ERBB2; ERGIC1; EVI2B; FADS2; FAM129A; FASN; FCER1G; FCN1; GCA; GLIPR2; HMGA1; ITGAM; ITGB2; KRT8; LMNB1; SOD2; MAP2K3; CREB5; LSP1; LYN; LYZ; MGAM; SLC16A3; MMP9; MNDA; MYADM; MYO1F; NCF4; PADI4; PLBD1; PLEK; PPP3R1; PTPN1; QPCT; R3HDM4; RAB5C; RAC2; RASSF5; S100A11; S100A12; S100A4; S…
MDA468	41	760	5.66298	1.36366	0.027743	1	0.132915	0.431649	ALDOA; ANXA1; CD44; CXCL1; FASN; HMGA1; ICAM1; KRT8; LMNB1; SOD2; PLAUR; S100A11; S100A6; S100A8; S100P; SDC4; STC1; TAGLN2; VASP; CANX; CLIC4; HSP90B1; EIF4A2; IGFBP2; DBI; HIST1H3C; HIST1H4B; HIST1H4E; LAMA4; MB; MYL6B; ALDH1A3; ANXA2; ATP1B3; CRISPLD2; CYR61; LCN2; PVR; SPTBN1; TACSTD2; THBS1;
Small intestine	387	8360	53.453	1.16991	1.16339e-05	0.00986558	0.000163724	0.000531703	AAED1; ACVR2B; ADRB2; ALDOA; ALOX5; ALOX5AP; BAZ1A; BBOX1; BCL2A1; BCL6; BHLHE40; BIRC3; C10orf10; C5AR1; CASP7; CCL4; CD44; CD55; CDC42EP3; CDHR2; CECR2; CELSR2; CETP; CMTM2; CSF2RB; CST7; DGAT2; DHODH; ELMSAN1; EMP1; EMP3; ERBB2; ERGIC1; EVI2B; F2RL1; FADS2; FAM102B; FAM107A; FAM129A; FAM65B; FASN; FCER1G; FGR; FLT1; FOSL2; FPR2; G0S2; GATA4; GATAD2A; GLIPR2; GPR160; GPR27; HAVCR2; HCK; HMOX1; …
Breast cancer	358	7467	49.4475	1.21167	1.01314e-06	0.00085914	2.20292e-05	7.1541e-05	AAED1; ACVR2B; ADRB2; AKAP12; ALDOA; ALOX5; ANXA1; ARHGAP30; BAZ1A; BBOX1; BCL2A1; BCL6; BHLHE40; BIRC3; C10orf10; C5AR1; CASP7; CCL4; CD44; CD55; CD83; CDC42EP3; CECR2; CELSR2; CHIC2; CMTM2; CSF2RB; DGAT2; DHODH; ELMSAN1; ENO3; ERBB2; ERGIC1; EVI2B; F2RL1; FADS2; FAM102B; FAM129A; FAM65B; FASN; FCER1G; FGR; FLT1; FOSL1; FOSL2; G0S2; GATA4; GATAD2A; GPR160; GPR27; HAVCR2; HCK; HMOX1; HSD17B14; HS…
Thyroid cancer	337	7281	46.547	1.16973	9.82274e-05	0.0832968	0.000991629	0.00322036	AAED1; ACVR2B; ALDOA; ALOX5; ANXA1; ARHGAP30; BAZ1A; BBOX1; BCL2A1; BHLHE40; BIRC3; C10orf10; C5AR1; CCL4; CD44; CD55; CD83; CDC42EP3; CECR2; CELSR2; CHIC2; CMTM2; CSF2RB; DGAT2; DHODH; ELMSAN1; ENO3; ERBB2; ERGIC1; EVI2B; F2RL1; FADS2; FAM102B; FAM129A; FASN; FCER1G; FGR; FLT1; FOSL1; FOSL2; G0S2; GATA4; GATAD2A; GPR160; GPR27; HAVCR2; HCK; HLA-DPA1; HMOX1; HSD17B14; HSPA6; ICAM1; IL17RA; IL1R2;…
Colon	383	8429	52.9006	1.14834	0.000100014	0.0848119	0.000997787	0.00324036	AAED1; ACVR2B; ADRB2; ALDOA; ALOX5; ANXA1; ARHGAP30; BAZ1A; BBOX1; BCL2A1; BCL6; BHLHE40; BIRC3; C10orf10; CASP7; CCL4; CD44; CD55; CD83; CDC42EP3; CDHR2; CECR2; CELSR2; CHIC2; CMTM2; CSF2RB; DGAT2; DHODH; ELMSAN1; EMP3; ERBB2; ERGIC1; EVI2B; F2RL1; FADS2; FAM102B; FAM107A; FAM129A; FAM65B; FASN; FCER1G; FGR; FLT1; FOSL2; FPR2; G0S2; GATA4; GATAD2A; GLIPR2; GPR160; GPR27; HAVCR2; HMOX1; HSD17B14;…
Parathyroid gland	272	5997	37.5691	1.14627	0.00309424	1	0.0194364	0.0631206	AAED1; ACVR2B; ADRB2; ALDOA; ALOX5; ARHGAP30; BAZ1A; BCL2A1; BIRC3; C10orf10; C5AR1; CASP7; CD55; CD83; CD93; CDC42EP3; CDHR2; CECR2; CELSR2; CHIC2; CMTM2; CSF2RB; CXCR2; DGAT2; DHODH; ELMSAN1; ENO3; ERBB2; ERGIC1; F2RL1; FAM102B; FAM129A; FASN; FGR; FLT1; GATA4; GATAD2A; GPR27; HAVCR2; HCK; HMOX1; HSD17B14; HSPA6; IL18RAP; IL1R2; IL1RN; IRF1; KCNJ15; KIAA0226L; KRT8; LITAF; LMNB1; SOD2; MAP2K3; …
Cervix, uterine	302	6391	41.7127	1.19423	6.60049e-05	0.0559721	0.000726911	0.00236068	ACVR2B; ADRB2; ALDOA; ALOX5; ANXA1; ARHGAP30; BAZ1A; BCL2A1; BHLHE40; BIRC3; C10orf10; CASP7; CCL4; CD44; CD55; CD83; CDC42EP3; CECR2; CELSR2; CHIC2; CMTM2; CNDP1; CSF2RB; CXCR2; DGAT2; DHODH; ELMSAN1; ERBB2; ERGIC1; EVI2B; F2RL1; FADS2; FAM102B; FAM129A; FASN; FCER1G; FGR; FLT1; FOSL1; FOSL2; G0S2; GATA4; GATAD2A; GPR160; GPR27; HCK; HSPA6; ICAM1; IL1R2; IL1RN; IRF1; JUND; KCNJ15; KIAA0226L; KRT…
Spleen	380	7887	52.4862	1.21764	1.40796e-07	0.000119395	3.61803e-06	1.17497e-05	AAED1; ADRB2; ALDOA; ALOX5; ALOX5AP; ANXA1; ARHGAP30; ARRDC3; BASP1; BAZ1A; BBOX1; BCL2A1; BCL6; BHLHE40; BIRC3; C5AR1; CASP7; CCL4; CD44; CD52; CD55; CD83; CD93; CDC42EP3; CECR2; CELSR2; CETP; CFP; CHIC2; CLEC7A; CMTM2; CORO1A; COTL1; CR1; CSF2RB; CST7; CXCR2; DEFA1; DGAT2; DHODH; DNMBP; DTX4; ELMSAN1; EMP1; EMP3; ERBB2; ERGIC1; EVI2B; F2RL1; FAM107A; FAM129A; FASN; FCER1G; FCGR2A; FCN1; FGR; FL…
HUVEC	526	13061	72.6519	1.01778	0.233889	1	0.621376	1	ADGRG3; ADSSL1; AKAP12; ALDOA; ALOX5; ALOX5AP; ANXA1; ARHGAP30; ARRDC4; AVPR1A; BASP1; BAZ1A; BCL2A1; BCL6; BHLHE40; BIRC3; C10orf10; C16orf54; CCDC71L; CD44; CD55; CD83; CD93; CDC42BPA; CDC42EP3; CDHR2; CECR2; CELSR2; CETP; CFP; CHIC2; CLC; CLPTM1; CNDP1; CORO1A; COTL1; CR1; CSF2RB; CSF3R; CXCL1; CXCL3; DEFA1B; DEFA1; DGAT2; DHODH; DNMBP; DOK3; DPEP2; DTX4; ELMSAN1; EMP3; ERBB2; ERGIC1; EVI2B; F…
Tonsils	368	7274	50.8287	1.27856	5.00393e-10	4.24333e-07	5.30416e-08	1.72255e-07	AAED1; ALDOA; ALOX5; ALOX5AP; ANXA1; ARHGAP30; BAZ1A; BBOX1; BCL2A1; BCL6; BHLHE40; BIRC3; C5AR1; CASP7; CCL4; CD44; CD55; CD83; CDC42EP3; CECR2; CELSR2; CHIC2; CMTM2; CR1; CSF2RB; CXCR2; DEFA1; DHODH; ELMSAN1; ERBB2; ERGIC1; EVI2B; F2RL1; FADS2; FAM102B; FAM129A; FASN; FCER1G; FCGR2A; FCN1; FGR; FLT1; FOSL1; FOSL2; G0S2; GATA4; GATAD2A; GPR160; GPR27; HAVCR2; HCK; HLA-DPA1; HMOX1; HSD17B14; HSPA…
Jurkat A3	109	4200	15.0552	0.655921	1	1	1	1	ALOX5; ARHGAP30; ARRDC4; BCL6; C16orf54; CCDC71L; CD44; CD55; CDC42BPA; CHIC2; CLPTM1; DHODH; DNMBP; DPEP2; ENO3; FADS2; FAM101B; FASN; GATAD2A; GCA; ITGB2; KRT8; SOD2; SLC16A3; MOB3A; PDE11A; PLAUR; PLXNC1; PPP1R18; PRKCI; PTPN1; RAB11FIP1; RAC2; RASSF5; SBNO2; SIGIRR; SLC2A3; SORT1; SP1; TAGAP; TLE3; TSLP; VASP; VNN2; YBX3; ZFP36L2; ZYX; CANX; CBX5; CPD; HSP90B1; LPP; MTMR4; NT5E; RAP1GDS1; SEP…
Rectum	340	7113	46.9613	1.20802	3.83353e-06	0.00325083	6.37418e-05	0.000207005	AAED1; ACVR2B; ADRB2; AKAP12; ALDOA; ALOX5; ANXA1; ARHGAP30; BAZ1A; BBOX1; BCL2A1; BCL6; BIRC3; C10orf10; C5AR1; CASP7; CCL4; CD44; CD55; CD83; CD93; CDC42EP3; CDHR2; CECR2; CELSR2; CHIC2; CSF2RB; DGAT2; DHODH; ELMSAN1; ERBB2; ERGIC1; EVI2B; F2RL1; FADS2; FAM102B; FAM129A; FAM65B; FASN; FCER1G; FCN1; FGR; FLT1; FOSL1; FOSL2; FPR2; G0S2; GATA4; GATAD2A; GPR160; GPR27; HAVCR2; HSD17B14; HSPA6; ICAM…
Liver	505	11680	69.7514	1.09268	0.000362315	0.307243	0.00305739	0.00992903	AAED1; ADRB2; AKAP12; ALDOA; ALOX5; ANXA1; ARHGAP30; ARRDC3; ARRDC4; AVPR1A; BASP1; BAZ1A; BBOX1; BCL6; BHLHE40; BIRC3; C10orf10; C5AR1; CASP7; CCL4; CD44; CD55; CDC42BPA; CDC42EP3; CDHR2; CECR2; CELSR2; CETP; CHIC2; CLPTM1; CMTM2; CNDP1; CORO1A; COTL1; CSF2RB; CST7; CXCL3; DEFA1B; DEFA3; DEFA1; DGAT2; DHODH; DNMBP; DTX4; ELMSAN1; EMP3; ENO3; ERBB2; ERGIC1; EVI2B; F2RL1; FADS2; FAM102B; FAM107A; …
CNS	5	74	0.690608	1.71074	0.168835	1	0.495333	1	CD44; FOS; GRIA3; KCNK1; MCAM;
CD4	80	1901	11.0497	1.06364	0.293718	1	0.736903	1	ALDOA; ALOX5AP; ANXA1; ARHGAP30; CD44; CNDP1; CORO1A; COTL1; DEFA1B; DEFA1; EFHD2; FAM129A; FASN; FCER1G; FCN1; GCA; GLIPR2; HMGA1; ITGAM; ITGB2; LMNB1; SOD2; MAP2K3; LSP1; LYN; LYZ; MMP9; MNDA; MOB3A; MYADM; MYO1F; PLBD1; PLEK; RAB5C; RAC2; RASSF2; RASSF5; S100A11; S100A12; S100A4; S100A6; S100A8; S100A9; S100P; SELL; SERPINB9; SLC2A3; SP1; TAGLN2; VASP; ZYX; CANX; CBX5; COL1A2; HLA-DQA1; HSP90B…
Skeletal muscles	390	9060	53.8674	1.08788	0.00933453	1	0.0497842	0.161676	AAED1; ADSSL1; AKAP12; ALDOA; ALOX5; ANXA1; ARRDC3; BAZ1A; BCL2A1; BCL6; C10orf10; CCL4; CD44; CD55; CD83; CD93; CDC42EP3; CDHR2; CECR2; CELSR2; CETP; CHIC2; CLPTM1; CMTM2; CNDP1; CORO1A; COTL1; CSF2RB; CST7; DGAT2; DHODH; DNMBP; ELMSAN1; EMP3; ENO3; ERBB2; ERGIC1; EVI2B; F2RL1; FADS2; FAM102B; FAM107A; FAM129A; FASN; FCGR2A; FCN1; FGR; FLT1; FOSL1; FOSL2; GATA4; GATAD2A; GLIPR2; GPR160; GPR27; H…
H293	215	6792	29.6961	0.800011	0.999992	1	1	1	ADSSL1; AKAP12; ALDOA; ANXA1; BASP1; BAZ1A; CASP7; CCL4; CD44; CD55; CD93; CDC42BPA; CELSR2; CFP; CLPTM1; CNDP1; CORO1A; COTL1; CXCL1; DHODH; DNMBP; DPEP2; EFHD2; ELMSAN1; ENO3; ERBB2; ERGIC1; FADS2; FAM101B; FAM129A; FASN; FCGR3B; FCN1; GATA4; GATAD2A; GLIPR2; HLA-DPA1; HMGA1; HMOX1; HSD17B14; ICAM1; ITGB2; ITPKC; JUND; KDM6B; KRT8; LILRB2; LMNB1; SOD2; MAP2K3; LPGAT1; LYN; LYZ; MLXIP; MMP9; MOB…
Prostate	368	7923	50.8287	1.17383	1.94224e-05	0.0164702	0.000249548	0.000810419	AAED1; ADRB2; AKAP12; ALDOA; ALOX5; ANXA1; AVPR1A; BAZ1A; BBOX1; BCL2A1; BHLHE40; C10orf10; C5AR1; CASP7; CCL4; CD44; CD55; CDC42EP3; CECR2; CELSR2; CHIC2; CMTM2; CSF2RB; CST7; DGAT2; DHODH; ELMSAN1; EMP1; ERBB2; ERGIC1; EVI2B; F2RL1; FADS2; FAM102B; FAM107A; FAM129A; FAM65B; FASN; FCER1G; FGR; FLT1; FOSL2; GATA4; GATAD2A; GLIPR2; GPR160; GPR27; HAVCR2; HCK; HMOX1; HSD17B14; HSPA6; ICAM1; IL17RA;…
Jurkat	110	2869	15.1934	0.969027	0.65931	1	1	1	ACVR2B; ALDOA; ANXA1; CASP7; CD44; CD55; CD83; CELSR2; CLPTM1; CORO1A; COTL1; CR1; DHODH; EFHD2; EMP3; ERGIC1; FADS2; FASN; FGR; GATAD2A; GCA; GLIPR2; HMGA1; ICAM1; IL17RA; ITGB2; LMNB1; LYN; MID1IP1; PILRA; PLIN1; QPCT; RAB5C; RAC2; RASSF5; RPS6KA5; S100A9; SELL; SORT1; TAGLN2; TLR1; TRAF4; VASP; YBX3; ABCB11; AUTS2; CANX; CBX5; EFEMP1; GLT8D1; HSP90B1; LMAN1; EIF4A2; NT5E; PTPRS; RAP1GDS1; SEC2…
Bone marrow	390	7808	53.8674	1.26232	4.2234e-10	3.58144e-07	5.11635e-08	1.66156e-07	AAED1; ACVR2B; ADRB2; AKAP12; ALDOA; ALOX5; ALOX5AP; ANXA1; ARHGAP30; BAZ1A; BBOX1; BCL2A1; BCL6; BHLHE40; BIRC3; C5AR1; CASP7; CD44; CD55; CD83; CD93; CDC42EP3; CELSR2; CHIC2; CLEC7A; CMTM2; CNDP1; CORO1A; COTL1; CR1; CSF2RB; CSF3R; CXCR2; DEFA3; DEFA1; DGAT2; DHODH; DNMBP; EFHD2; ELMSAN1; ENO3; ERBB2; ERGIC1; EVI2B; F2RL1; FADS2; FAM102B; FAM129A; FASN; FCER1G; FCGR2A; FCN1; FGR; FLT1; FOSL2; F…
Lateral ventricle	309	6620	42.6796	1.17964	0.000137475	0.116579	0.00132476	0.00430221	AAED1; ACVR2B; ALDOA; ALOX5; ALOX5AP; ANXA1; BAZ1A; BBOX1; BCL2A1; BHLHE40; C10orf10; C5AR1; CCL4; CD44; CD55; CD93; CDC42EP3; CDHR2; CECR2; CELSR2; CMTM2; CNDP1; CSF2RB; CXCR2; DGAT2; DHODH; ELMSAN1; ENO3; ERGIC1; EVI2B; F2RL1; FADS2; FAM102B; FAM129A; FASN; FCER1G; FCGR2A; FGR; FLT1; FOSL2; FPR2; GATA4; GATAD2A; GPR160; GPR27; HAVCR2; HCK; HMOX1; HSD17B14; HSPA6; IL17RA; IL18RAP; IL1R2; IL1RN; …
Colorectal cancer	370	7513	51.105	1.24462	1.67533e-08	1.42068e-05	8.01324e-07	2.60234e-06	AAED1; ACVR2B; ADRB2; AKAP12; ALDOA; ALOX5; ANXA1; ARHGAP30; BAZ1A; BBOX1; BCL2A1; BCL6; BHLHE40; BIRC3; C10orf10; C5AR1; CASP7; CCL4; CD44; CD55; CD83; CDC42EP3; CDHR2; CECR2; CELSR2; CHIC2; CMTM2; CSF2RB; CSF3R; CXCR2; DGAT2; DHODH; ELMSAN1; ENO3; ERBB2; ERGIC1; EVI2B; F2RL1; FADS2; FAM102B; FAM129A; FAM65B; FASN; FCER1G; FGR; FLT1; FOSL1; FOSL2; FPR2; G0S2; GATA4; GATAD2A; GPR160; GPR27; HAVCR…
Gall bladder	347	7295	47.9282	1.20213	4.41858e-06	0.00374696	7.10981e-05	0.000230894	AAED1; ACVR2B; ADRB2; ALDOA; ALOX5; ANXA1; ARHGAP30; BAZ1A; BBOX1; BCL2A1; BCL6; BHLHE40; C10orf10; C5AR1; CASP7; CCL4; CD44; CD55; CD83; CDC42EP3; CDHR2; CECR2; CELSR2; CHIC2; CMTM2; CSF2RB; CXCR2; DGAT2; DHODH; ELMSAN1; EMP3; ERBB2; ERGIC1; EVI2B; F2RL1; FADS2; FAM102B; FAM129A; FAM65B; FASN; FCER1G; FGR; FLT1; FOSL2; G0S2; GATA4; GATAD2A; GPR160; GPR27; HAVCR2; HCK; HMOX1; HSD17B14; HSPA6; ICA…
Plasma	507	11971	70.0276	1.07034	0.00413291	1	0.0248561	0.0807212	ACVR2B; ADGRG3; ADRB2; AKAP12; ALDOA; ALOX5; ANXA1; ARHGAP30; ARRDC3; AVPR1A; BASP1; BAZ1A; BCL6; BIRC3; C16orf54; C5AR1; CASP7; CCL4; CD44; CD55; CD93; CDC42BPA; CDC42EP3; CDHR2; CECR2; CELSR2; CETP; CFP; CLC; CLPTM1; CNDP1; CORO1A; COTL1; CR1; CSF2RB; CSF3R; CST7; CXCL1; CXCL3; DEFA1B; DEFA3; DEFA1; DGAT2; DHODH; DNMBP; DOK3; DPEP2; DTX4; EFHD2; ELMSAN1; ENO3; ERBB2; EVI2B; FADS2; FAM107A; FAM1…
Malignant carcinoid	327	7081	45.1657	1.16708	0.000172847	0.146574	0.0016286	0.00528895	AAED1; ACVR2B; ADRB2; ALDOA; ALOX5; ANXA1; ARHGAP30; BAZ1A; BBOX1; BCL2A1; BHLHE40; C10orf10; C5AR1; CASP7; CCL4; CD44; CD55; CD83; CDC42EP3; CDHR2; CECR2; CELSR2; CHIC2; CMTM2; CSF2RB; CXCR2; DGAT2; DHODH; ELMSAN1; ENO3; ERBB2; ERGIC1; EVI2B; F2RL1; FADS2; FAM102B; FAM129A; FASN; FCER1G; FCN1; FGR; FLT1; FOSL2; G0S2; GATA4; GATAD2A; GPR160; GPR27; HAVCR2; HCK; HMOX1; HSPA6; ICAM1; IL17RA; IL1R2;…
Ascites cancer cell	176	3509	24.3094	1.26762	0.000293229	0.248658	0.00252605	0.00820345	AKAP12; ALDOA; ALOX5; ALOX5AP; ANXA1; BASP1; C16orf54; C5AR1; CASP7; CCL4; CD44; CELSR2; CETP; CFP; CLPTM1; CORO1A; COTL1; CXCL1; CXCL3; DEFA1B; DEFA3; DEFA1; DOK3; EFHD2; ERGIC1; EVI2B; FASN; FCER1G; FCGR3B; FCN1; GATAD2A; GCA; GLIPR2; HAVCR2; HLA-DPA1; HMGA1; HMOX1; HSPA6; ICAM1; IL1RN; ITGAM; ITGB2; JUND; KIAA0226L; KRT8; LILRB2; LMNB1; SOD2; LSP1; LST1; LYZ; METRNL; SLC16A3; MMP9; MNDA; MX2; …
Endometrial cancer	367	7460	50.6906	1.24329	2.4171e-08	2.0497e-05	1.07879e-06	3.50341e-06	AAED1; ACVR2B; AKAP12; ALDOA; ALOX5; ANXA1; ARHGAP30; BAZ1A; BBOX1; BCL2A1; BHLHE40; C10orf10; C5AR1; CASP7; CCL4; CD44; CD55; CD83; CDC42EP3; CDHR2; CECR2; CELSR2; CHIC2; CMTM2; CNDP1; CSF2RB; CSF3R; DGAT2; DHODH; ELMSAN1; ENO3; ERBB2; ERGIC1; EVI2B; F2RL1; FADS2; FAM102B; FAM129A; FAM65B; FASN; FCER1G; FGR; FLT1; FOSL1; FOSL2; G0S2; GATA4; GATAD2A; GPR160; GPR27; HAVCR2; HCK; HLA-DPA1; HMOX1; H…
Lung cancer	356	7435	49.1713	1.21009	1.31892e-06	0.00111844	2.66296e-05	8.64808e-05	AAED1; ACVR2B; AKAP12; ALDOA; ALOX5; ANXA1; BAZ1A; BBOX1; BCL2A1; BCL6; BHLHE40; BIRC3; C10orf10; C5AR1; CASP7; CCL4; CD44; CD55; CD83; CDC42EP3; CDHR2; CECR2; CELSR2; CHIC2; CMTM2; CSF2RB; DGAT2; DHODH; ELMSAN1; ENO3; ERBB2; ERGIC1; EVI2B; F2RL1; FADS2; FAM102B; FAM129A; FASN; FCER1G; FGR; FLT1; FOSL1; FOSL2; G0S2; GATA4; GATAD2A; GPR160; GPR27; HCK; HLA-DPA1; HMOX1; HSPA6; ICAM1; IL17RA; IL18RA…
HCT116	88	2651	12.1547	0.838989	0.97173	1	1	1	ADSSL1; AKAP12; ALDOA; ANXA1; BAZ1A; CD44; COTL1; EFHD2; ENO3; ERBB2; FASN; FGR; FLT1; GCA; HCK; HMGA1; HMOX1; HSPA6; KRT8; LMNB1; SOD2; MAP2K3; LST1; LYN; SLC16A3; PKLR; PTPN1; RAB5C; RAC2; S100A11; S100A4; S100A6; SERPINB9; SOX7; STAT3; TAGLN2; YBX3; CANX; CLIC4; HSP90B1; EIF4A2; RAP1GDS1; SEC22B; SEC61A1; TIA1; TMED2; TWF1; ASPM; BRCA1; CPOX; CSTA; DBI; FBXO2; GNAO1; HIST1H1A; HIST1H1E; HIST1H…
PC3	83	1294	11.4641	1.62117	8.07837e-06	0.00685046	0.000120183	0.000390301	AKAP12; ALDOA; ANXA1; BASP1; CD44; CD55; COTL1; CXCL1; CXCL3; EFHD2; ENO3; FASN; HMGA1; HSPA6; ICAM1; KRT8; LMNB1; SOD2; PLAUR; S100A11; SDC4; SGCE; TAGLN2; TGFB1; ZYX; CLIC4; CPD; EFEMP1; HSP90B1; LMAN1; MCFD2; EIF4A2; PTPRS; SEC22B; SEPSECS; TIA1; TWF1; IGFBP2; GDF15; DBI; EPHA1; HIST1H2BF; HIST1H3C; HIST1H4B; HIST1H4E; HIST2H2AB; HIST2H2AC; MYL6B; PRSS3; RPS4Y1; SLC29A1; ACTG2; ADAM19; ADAMTS1…
MicroProt	29	440	4.00552	1.66618	0.00522945	1	0.0303738	0.0986404	CD44; CFP; CNDP1; DEFA1B; DEFA1; G0S2; GLIPR2; ICAM1; LYZ; PRAP1; S100A11; S100A6; S100A8; S100A9; TGFB1; MCFD2; SEC63; IGFBP2; CCL14; CSTA; DBI; MB; ANXA2; FSTL3; LCN2; SAA1; SERPINA1; THBS1; TNFRSF12A;
Epididymis	338	7090	46.6851	1.20481	5.5913e-06	0.00474142	8.62077e-05	0.000279964	AAED1; ACVR2B; ADRB2; AKAP12; ALDOA; ALOX5; ANXA1; BAZ1A; BBOX1; BCL2A1; BCL6; BHLHE40; C5AR1; CASP7; CCL4; CD44; CD52; CD55; CD83; CDC42EP3; CECR2; CELSR2; CHIC2; CMTM2; CSF2RB; CXCR2; DGAT2; DHODH; ELMSAN1; ERBB2; ERGIC1; EVI2B; F2RL1; FADS2; FAM102B; FAM129A; FASN; FCER1G; FGR; FLT1; FOSL2; G0S2; GATA4; GATAD2A; GPR160; GPR27; HAVCR2; HCK; HMOX1; HSPA6; ICAM1; IL17RA; IL1R2; IL1RN; IRF1; ITGB2…
Cerebellum	340	7633	46.9613	1.12572	0.00205477	1	0.0134034	0.0435282	AAED1; AKAP12; ALDOA; ALOX5; ANXA1; ARRDC3; BAZ1A; BCL2A1; BCL6; BHLHE40; C10orf10; C5AR1; CASP7; CCL4; CD44; CD55; CD83; CD93; CDC42EP3; CDHR2; CECR2; CELSR2; CMTM2; CNDP1; CSF2RB; CSF3R; CXCR2; DGAT2; DHODH; DNMBP; DTX4; ELMSAN1; ENO3; ERBB2; ERGIC1; EVI2B; F2RL1; FADS2; FAM102B; FAM129A; FASN; FCER1G; FCGR2A; FGR; FLT1; FPR2; GATA4; GATAD2A; GPR160; GPR27; HAVCR2; HCK; HMOX1; HSD17B14; HSPA6; …
Nasopharynx	333	6904	45.9945	1.21897	2.20078e-06	0.00186626	4.05709e-05	0.000131756	AAED1; ACVR2B; ADRB2; AKAP12; ALDOA; ALOX5; ANXA1; BAZ1A; BBOX1; BCL2A1; BCL6; BHLHE40; C10orf10; C5AR1; CASP7; CCL4; CD44; CD55; CDC42EP3; CECR2; CELSR2; CHIC2; CMTM2; CSF2RB; DGAT2; DHODH; ELMSAN1; ENO3; ERBB2; ERGIC1; F2RL1; FADS2; FAM102B; FAM129A; FAM65B; FASN; FGR; FLT1; FOSL1; FOSL2; G0S2; GATA4; GATAD2A; GPR160; GPR27; HAVCR2; HCK; HLA-DPA1; HMOX1; HSPA6; ICAM1; IL1R2; IL1RN; IRF1; ITGB2;…
global_SCX_fractionated	70	2476	9.66851	0.714567	0.999492	1	1	1	ALDOA; ANXA1; CASP7; CD44; CLPTM1; CORO1A; COTL1; EFHD2; ERGIC1; FASN; HMGA1; IL1RN; ITPKC; KRT8; LMNB1; SOD2; SLC16A3; PKLR; PRKCI; PTPN1; RAC2; S100A11; S100A6; S100A8; S100A9; TAGLN2; VASP; YBX3; ZYX; CANX; CLIC4; HSP90B1; LMAN1; LPP; MCFD2; EIF4A2; NT5E; RAP1GDS1; SEC22B; SEC61A1; TWF1; ACSS2; CPOX; DBI; FBXO2; HIST1H3C; HIST1H4B; HIST1H4E; MYL6B; SLC29A1; TBC1D2; TP53I3; ALDH1A3; ANXA2; ATP1…
Hippocampus	331	7355	45.7182	1.13735	0.00119766	1	0.00846345	0.0274855	AAED1; ACVR2B; ALDOA; ALOX5; ALOX5AP; ANXA1; ARRDC3; BHLHE40; C10orf10; C5AR1; CCL4; CD44; CD55; CDC42EP3; CDHR2; CECR2; CELSR2; CMTM2; CNDP1; CSF2RB; CSF3R; CXCR2; DGAT2; DHODH; DNMBP; DTX4; ELMSAN1; ENO3; ERBB2; ERGIC1; EVI2B; F2RL1; FADS2; FAM102B; FASN; FCER1G; FCGR2A; FGR; FLT1; FOSL2; GATA4; GATAD2A; GPR27; HAVCR2; HCK; HMOX1; HSD17B14; HSPA6; IL17RA; IL18RAP; IL1R2; IL1RN; IRF1; ITGAM; ITG…
HeLa	205	5789	28.3149	0.894966	0.978214	1	1	1	ACVR2B; ADGRG3; ALDOA; ANXA1; BASP1; BAZ1A; BIRC3; CASP7; CD44; CD55; CD83; CD93; CDC42BPA; CECR2; COTL1; CSF2RB; DGAT2; DNMBP; EFHD2; ELMSAN1; ENO3; ERGIC1; FAM107A; FAM129A; FASN; FCN1; FGR; GATAD2A; GCA; GPR160; HCK; HSPA6; ITGB2; JUND; KIAA0226L; KRT8; LMNB1; SOD2; LPGAT1; LRRK2; LSP1; LYN; LYZ; MGAM; SLC16A3; NABP1; NCF2; PDE11A; PLAUR; PLEKHO2; RAB11FIP1; RAB20; RAB5C; RAC2; RALGDS; RIPK4; …
Malignant lymphoma	332	6586	45.8564	1.27399	1.70092e-08	1.44238e-05	8.01324e-07	2.60234e-06	ACVR2B; ADRB2; AKAP12; ALDOA; ALOX5; ALOX5AP; ARHGAP30; BAZ1A; BCL2A1; BCL6; BHLHE40; BIRC3; C5AR1; CASP7; CCL4; CD44; CD55; CD83; CDC42EP3; CECR2; CELSR2; CHIC2; CMTM2; CR1; CSF2RB; DHODH; ELMSAN1; ERBB2; ERGIC1; EVI2B; F2RL1; FADS2; FAM102B; FAM129A; FAM65B; FASN; FCER1G; FCGR2A; FCN1; FGR; FLT1; FOSL1; FOSL2; G0S2; GATA4; GATAD2A; GPR160; GPR27; HAVCR2; HCK; HLA-DPA1; HMOX1; HSD17B14; HSPA6; I…
Prostate cancer	341	7214	47.0994	1.19461	1.13376e-05	0.0096143	0.000162954	0.000529202	AAED1; ACVR2B; ADRB2; AKAP12; ALDOA; ALOX5; ANXA1; BBOX1; BCL2A1; BCL6; BHLHE40; C10orf10; C5AR1; CASP7; CCL4; CD44; CD55; CD83; CDC42EP3; CECR2; CELSR2; CHIC2; CMTM2; CSF2RB; DGAT2; DHODH; ELMSAN1; ERBB2; ERGIC1; EVI2B; F2RL1; FADS2; FAM102B; FAM129A; FAM65B; FASN; FCER1G; FGR; FLT1; FOSL1; FOSL2; G0S2; GATA4; GATAD2A; GPR160; GPR27; HAVCR2; HCK; HSD17B14; HSPA6; ICAM1; IL17RA; IL18RAP; IL1R2; I…
Skin	352	7292	48.6188	1.21995	6.67455e-07	0.000566002	1.48948e-05	4.83715e-05	ADRB2; AKAP12; ALDOA; ALOX5; ALOX5AP; ANXA1; ARHGAP30; BASP1; BAZ1A; BCL2A1; BCL6; BHLHE40; BIRC3; C5AR1; CASP7; CD44; CD55; CD93; CDC42EP3; CECR2; CELSR2; CMTM2; CNDP1; CORO1A; COTL1; CSF2RB; CXCR2; DHODH; EFHD2; ELMSAN1; ERBB2; ERGIC1; F2RL1; FADS2; FAM129A; FASN; FGR; FLT1; FOSL1; FOSL2; FPR2; G0S2; GATA4; GATAD2A; GLIPR2; GPR160; GPR27; HAVCR2; HCK; HIVEP1; HSPA6; ICAM1; IL18RAP; IL1R2; IL1RN…
Placenta	486	10894	67.1271	1.12744	1.0573e-05	0.00896587	0.000154584	0.000502019	AAED1; ACVR2B; ADRB2; AKAP12; ALDOA; ALOX5; ALOX5AP; ANXA1; ARHGAP30; BASP1; BAZ1A; BBOX1; BCL2A1; BCL6; BHLHE40; BIRC3; C10orf10; C5AR1; CASP7; CCL4; CD44; CD55; CD83; CD93; CDC42BPA; CDC42EP3; CDHR2; CECR2; CELSR2; CHIC2; CLPTM1; CMTM2; CORO1A; COTL1; CSF2RB; CSF3R; CST7; DEFA1; DGAT2; DHODH; DNMBP; EFHD2; ELMSAN1; EMP1; EMP3; ERBB2; ERGIC1; EVI2B; F2RL1; FADS2; FAM102B; FAM107A; FAM129A; FAM65…
Lung	482	9992	66.5746	1.2191	1.59484e-11	1.35242e-08	2.25404e-09	7.3201e-09	AAED1; ADRB2; AKAP12; ALDOA; ALOX5; ALOX5AP; ANXA1; ARHGAP30; ARRDC3; AVPR1A; BASP1; BAZ1A; BBOX1; BCL2A1; BCL6; BHLHE40; BIRC3; C10orf10; C5AR1; CASP7; CCL4; CD44; CD55; CD83; CD93; CDC42BPA; CDC42EP3; CECR2; CELSR2; CHIC2; CLPTM1; CMTM2; CNDP1; CORO1A; COTL1; CSF2RB; CSF3R; CST7; CXCR2; DGAT2; DHODH; DNMBP; DTX4; ELMSAN1; EMP1; EMP3; ERBB2; ERGIC1; EVI2B; F2RL1; FADS2; FAM102B; FAM107A; FAM129A…
Cerebral cortex	335	7099	46.2707	1.1926	1.77223e-05	0.0150285	0.000231208	0.000750858	AAED1; ALDOA; ALOX5; ALOX5AP; ANXA1; BAZ1A; BCL2A1; BHLHE40; C10orf10; C5AR1; CCL4; CD44; CD55; CD83; CDC42EP3; CDHR2; CECR2; CELSR2; CMTM2; CNDP1; CSF2RB; CSF3R; CXCR2; DGAT2; DHODH; ELMSAN1; ENO3; ERBB2; ERGIC1; EVI2B; F2RL1; FADS2; FAM102B; FASN; FCER1G; FCGR2A; FGR; FLT1; FOSL2; G0S2; GATA4; GATAD2A; GPR160; GPR27; HAVCR2; HCK; HMOX1; HSD17B14; HSPA6; IL17RA; IL18RAP; IL1R2; IL1RN; IRF1; ITGA…
Ovarian cancer	373	7644	51.5193	1.2332	4.46601e-08	3.78717e-05	1.57799e-06	5.12459e-06	AAED1; ACVR2B; AKAP12; ALDOA; ALOX5; ANXA1; ARHGAP30; BAZ1A; BBOX1; BCL2A1; BCL6; BHLHE40; BIRC3; C10orf10; C5AR1; CASP7; CCL4; CD44; CD55; CD83; CDC42EP3; CDHR2; CECR2; CELSR2; CHIC2; CMTM2; CNDP1; CSF2RB; CSF3R; DGAT2; DHODH; ELMSAN1; ENO3; ERBB2; ERGIC1; EVI2B; F2RL1; FADS2; FAM102B; FAM129A; FAM65B; FASN; FCER1G; FGR; FLT1; FOSL1; FOSL2; FPR2; G0S2; GATA4; GATAD2A; GPR160; GPR27; HAVCR2; HCK;…
Kidney	464	10256	64.0884	1.14336	4.44363e-06	0.0037682	7.10981e-05	0.000230894	AAED1; ACVR2B; ADRB2; AKAP12; ALDOA; ALOX5; ANXA1; ARHGAP30; ARRDC3; AVPR1A; BASP1; BAZ1A; BBOX1; BCL2A1; BHLHE40; BIRC3; C10orf10; C5AR1; CASP7; CCL4; CD44; CD55; CD83; CD93; CDC42BPA; CDC42EP3; CDHR2; CECR2; CELSR2; CHIC2; CLPTM1; CMTM2; CNDP1; COTL1; CR1; CSF2RB; DGAT2; DHODH; DNMBP; DTX4; ELMSAN1; EMP1; EMP3; ERBB2; ERGIC1; EVI2B; F2RL1; FADS2; FAM102B; FAM107A; FAM129A; FAM65B; FASN; FCER1G;…
H1688	33	1007	4.55801	0.828414	0.891541	1	1	1	ALDOA; COTL1; KRT8; LMNB1; SOD2; S100A11; SORT1; TAGLN2; CANX; CBX5; CPD; HSP90B1; LMAN1; LPP; EIF4A2; TWF1; IGFBP2; GDF15; DBI; HIST1H2BF; HIST1H3C; HIST1H4B; HIST1H4E; HIST2H2AC; PRSS3; CALCA; CT47A7; MAGEA10; MAP1B; NAMPT; SERPINA1; SPTBN1; SYNE2;
Sy5y	85	2490	11.7403	0.862789	0.94184	1	1	1	ALDOA; ANXA1; BASP1; CDC42EP3; CORO1A; DHODH; ENO3; FADS2; FASN; GATA4; GCA; GLIPR2; IL1RN; ITGAM; ITGB2; JUND; KRT8; LMNB1; SOD2; LYN; LYZ; MMP9; MNDA; MYADM; PADI4; PEG10; PLBD1; PLEKHO2; PPP1R18; RAB11FIP1; RAB5C; RAC2; S100A11; S100A12; S100A8; S100A9; SGCE; TAGLN2; TLE3; VASP; WASL; CANX; CLIC4; HSP90B1; EIF4A2; PTPRS; SEC22B; SEC63; TMED2; NCAM2; ACBD5; ASPM; C14orf80; CKAP2; CSTA; HIST1H1E…
Duodenum	338	7275	46.6851	1.17417	6.71268e-05	0.0569236	0.000729789	0.00237003	AAED1; ACVR2B; ALDOA; ALOX5; ANXA1; BAZ1A; BBOX1; BCL2A1; BCL6; BHLHE40; BIRC3; C10orf10; C5AR1; CASP7; CCL4; CD44; CD55; CD83; CDC42EP3; CDHR2; CECR2; CELSR2; CMTM2; CSF2RB; DGAT2; DHODH; ELMSAN1; ERBB2; ERGIC1; EVI2B; F2RL1; FADS2; FAM102B; FAM129A; FAM65B; FASN; FCER1G; FGR; FLT1; FOSL2; FPR2; G0S2; GATA4; GATAD2A; GPR160; GPR27; HAVCR2; HCK; HMOX1; HSD17B14; HSPA6; ICAM1; IL17RA; IL18RAP; IL1…
Bronchus	338	6923	46.6851	1.23387	4.4381e-07	0.000376351	1.01717e-05	3.30329e-05	AAED1; ACVR2B; ADRB2; AKAP12; ALDOA; ALOX5; ANXA1; BAZ1A; BBOX1; BCL2A1; BCL6; BHLHE40; C10orf10; C5AR1; CASP7; CCL4; CD44; CD55; CDC42EP3; CDHR2; CECR2; CELSR2; CHIC2; CSF2RB; CSF3R; CXCR2; DGAT2; DHODH; ELMSAN1; ENO3; ERBB2; ERGIC1; EVI2B; F2RL1; FADS2; FAM102B; FAM129A; FAM65B; FASN; FCER1G; FGR; FLT1; FOSL2; G0S2; GATA4; GATAD2A; GPR160; GPR27; HAVCR2; HCK; HLA-DPA1; HSD17B14; HSPA6; ICAM1; I…
Brain	297	7290	41.0221	1.02962	0.266252	1	0.686266	1	ACVR2B; AKAP12; ALDOA; ALOX5; ANXA1; ARRDC3; AVPR1A; BASP1; BAZ1A; BBOX1; BHLHE40; BIRC3; CCL4; CD44; CDC42BPA; CECR2; CELSR2; CLPTM1; CNDP1; CORO1A; COTL1; CXCR2; DEFA1B; DEFA3; DEFA1; DGAT2; DNMBP; DTX4; EFHD2; ENO3; ERGIC1; F2RL1; FADS2; FAM107A; FASN; FGR; FLT1; GATAD2A; GLIPR2; GPR27; HCK; HSPA6; ICAM1; IL17RA; ITPKC; ITPRIP; KCNJ15; KRT8; LITAF; LMNB1; SOD2; CREB5; LPGAT1; LRRK2; LSP1; LYN;…
Stomach	387	8044	53.453	1.21586	1.0586e-07	8.9769e-05	2.80528e-06	9.11028e-06	AAED1; ACVR2B; ADRB2; AKAP12; ALDOA; ALOX5; ANXA1; ARHGAP30; BAZ1A; BBOX1; BCL2A1; BCL6; BHLHE40; BIRC3; C10orf10; C5AR1; CASP7; CCL4; CD44; CD55; CD93; CDC42EP3; CDHR2; CECR2; CELSR2; CHIC2; CMTM2; CSF2RB; CSF3R; CXCR2; DGAT2; DHODH; ELMSAN1; ERBB2; ERGIC1; EVI2B; F2RL1; FADS2; FAM102B; FAM129A; FAM65B; FASN; FCER1G; FGR; FLT1; FOSL1; FOSL2; G0S2; GATA4; GATAD2A; GPR160; GPR27; HAVCR2; HCK; HMOX…
Pancreas	435	9936	60.0829	1.10643	0.000791164	0.670907	0.00599024	0.0194536	AAED1; ACVR2B; ADRB2; AKAP12; ALDOA; ALOX5; ANXA1; ARHGAP30; ARRDC3; BASP1; BAZ1A; BCL2A1; BHLHE40; BIRC3; C10orf10; C5AR1; CASP7; CCL4; CD44; CD55; CD83; CDC42BPA; CDC42EP3; CECR2; CELSR2; CHIC2; CLPTM1; CMTM2; COTL1; CSF2RB; CSF3R; CST7; CXCR2; DGAT2; DHODH; DNMBP; DTX4; ELMSAN1; EMP3; ENO3; ERBB2; ERGIC1; EVI2B; F2RL1; FADS2; FAM102B; FAM107A; FAM129A; FAM65B; FASN; FCER1G; FGR; FLT1; FOSL2; F…
Lymph nodes	340	6700	46.9613	1.28248	3.92766e-09	3.33065e-06	2.56204e-07	8.32034e-07	AAED1; ALDOA; ALOX5; ALOX5AP; ANXA1; ARHGAP30; BAZ1A; BBOX1; BCL2A1; BCL6; BHLHE40; BIRC3; C5AR1; CASP7; CD44; CD55; CD83; CDC42EP3; CECR2; CELSR2; CLEC7A; CMTM2; CORO1A; COTL1; CR1; CSF2RB; CXCR2; DGAT2; DHODH; ELMSAN1; ERBB2; ERGIC1; EVI2B; F2RL1; FAM102B; FAM129A; FASN; FCAMR; FCER1G; FCGR2A; FCN1; FGR; FLT1; FOSL2; GATA4; GATAD2A; GPR160; GPR27; HAVCR2; HCK; HLA-DPA1; HMOX1; HSPA6; ICAM1; IL1…
H358	68	1489	9.39227	1.15428	0.118253	1	0.381286	1	ALDOA; ANXA1; BASP1; CD44; CD55; COTL1; EFHD2; FASN; HMGA1; KRT8; LMNB1; LYN; METRNL; SLC16A3; S100A11; S100A6; S100P; SDC4; SELL; SGCE; SLC6A6; SORT1; TAGLN2; TNFRSF10C; VASP; ZYX; CANX; CBX5; CLIC4; CPD; EFEMP1; HSP90B1; MCFD2; EIF4A2; NT5E; PTPRS; SEC22B; IGFBP2; GDF15; AFP; DBI; HIST1H2BF; HIST1H3C; HIST1H4B; HIST1H4E; HIST2H2AB; MB; METRN; SAMD3; TP53I3; ADAM19; ALDH1A3; ANXA2; EPHA2; FSTL3;…
Fallopian tubes	317	6677	43.7845	1.19985	2.29418e-05	0.0194546	0.000286098	0.000929115	AAED1; ACVR2B; ADRB2; AKAP12; ALDOA; ALOX5; ANXA1; ARHGAP30; BAZ1A; BBOX1; BCL2A1; BCL6; BHLHE40; BIRC3; C10orf10; C5AR1; CASP7; CCL4; CD44; CD55; CD83; CDC42EP3; CDHR2; CECR2; CELSR2; CMTM2; CSF2RB; CXCR2; DGAT2; DHODH; ELMSAN1; ENO3; ERBB2; ERGIC1; EVI2B; F2RL1; FADS2; FAM102B; FAM129A; FAM65B; FASN; FGR; FLT1; FOSL2; G0S2; GATA4; GATAD2A; GPR160; GPR27; HAVCR2; HCK; HLA-DPA1; HMOX1; HSPA6; ICA…
Head & neck cancer	339	7062	46.8232	1.21316	2.59756e-06	0.00220273	4.52215e-05	0.000146859	AAED1; ACVR2B; AKAP12; ALDOA; ALOX5; ANXA1; BAZ1A; BBOX1; BCL2A1; BCL6; BHLHE40; BIRC3; C5AR1; CASP7; CCL4; CD44; CD55; CD83; CDC42EP3; CECR2; CELSR2; CHIC2; CMTM2; CNDP1; CSF2RB; DGAT2; DHODH; ELMSAN1; ERBB2; ERGIC1; EVI2B; F2RL1; FADS2; FAM102B; FASN; FGR; FLT1; FOSL1; FOSL2; G0S2; GATA4; GATAD2A; GPR160; GPR27; HAVCR2; HCK; HLA-DPA1; HSD17B14; HSPA6; ICAM1; IL1R2; IL1RN; IRF1; JUND; KCNJ15; KI…
Pancreatic cancer	409	8316	56.4917	1.24295	7.92671e-10	6.72185e-07	7.46872e-08	2.4255e-07	AAED1; ACVR2B; ADRB2; AKAP12; ALDOA; ALOX5; ALOX5AP; ANXA1; ARHGAP30; BASP1; BAZ1A; BBOX1; BCL2A1; BCL6; BHLHE40; C10orf10; C5AR1; CASP7; CCL4; CD44; CD55; CD83; CDC42EP3; CDHR2; CECR2; CELSR2; CHIC2; CMTM2; CNDP1; CORO1A; COTL1; CSF2RB; DEFA1B; DEFA1; DGAT2; DHODH; EFHD2; ELMSAN1; ENO3; ERBB2; ERGIC1; EVI2B; F2RL1; FADS2; FAM102B; FAM129A; FAM65B; FASN; FCER1G; FGR; FLT1; FOSL1; FOSL2; FPR2; G0S…
BT474	31	558	4.28177	1.40441	0.0365642	1	0.168513	0.547255	ALDOA; BASP1; CD44; CXCL1; EFHD2; ERBB2; FASN; KRT8; LMNB1; SOD2; S100A11; S100A6; SDC4; TAGLN2; YBX3; CANX; CBX5; IGFBP2; DBI; HIST1H1E; HIST1H2BF; HIST1H4B; HIST1H4E; MB; MYL6B; ANXA2; CYR61; LCN2; SERPINA1; THBS1; TNFRSF12A;
Seminal vesicle	305	6620	42.1271	1.16437	0.000437125	0.370682	0.003497	0.0113567	AAED1; ACVR2B; ALDOA; ALOX5; ANXA1; BAZ1A; BBOX1; BCL2A1; BHLHE40; BIRC3; C10orf10; CASP7; CCL4; CD44; CD52; CD55; CD83; CDC42EP3; CECR2; CELSR2; CHIC2; CMTM2; CSF2RB; CXCR2; DGAT2; DHODH; ELMSAN1; ERBB2; ERGIC1; EVI2B; F2RL1; FADS2; FAM102B; FAM129A; FASN; FGR; FLT1; FOSL1; FOSL2; GATA4; GATAD2A; GPR27; HLA-DPA1; HMOX1; HSD17B14; HSPA6; ICAM1; IL17RA; IL1R2; IL1RN; IRF1; KCNJ15; KIAA0226L; KRT8;…
Urinary bladder	340	7054	46.9613	1.21812	1.59481e-06	0.0013524	3.07363e-05	9.98174e-05	AAED1; ACVR2B; ADRB2; AKAP12; ALDOA; ALOX5; ANXA1; ARHGAP30; BAZ1A; BCL2A1; BCL6; BHLHE40; BIRC3; C10orf10; C5AR1; CASP7; CCL4; CD44; CD55; CD83; CDC42EP3; CECR2; CELSR2; CHIC2; CMTM2; CSF2RB; CXCR2; DGAT2; DHODH; ELMSAN1; ENO3; ERBB2; ERGIC1; EVI2B; F2RL1; FADS2; FAM102B; FAM129A; FASN; FCER1G; FGR; FLT1; FOSL1; FOSL2; G0S2; GATA4; GATAD2A; GPR160; GPR27; HAVCR2; HCK; HMOX1; HSD17B14; HSPA6; ICA…
K-562	72	2513	9.94475	0.724159	0.999309	1	1	1	ACVR2B; ALDOA; ANXA1; BAZ1A; CDC42BPA; COTL1; DOK3; EFHD2; ERGIC1; FAM129A; FAM65B; FASN; GATAD2A; HCK; HMGA1; KRT8; LMNB1; SOD2; LRRK2; LYN; PIM1; PKLR; RAB5C; RASSF5; S100A11; S100A8; SERPINB9; SIN3A; SLC2A14; SORT1; SP1; TAGLN2; THEMIS2; VASP; YBX3; ZYX; CANX; CBX5; CLIC4; HMBOX1; HSP90B1; MCFD2; SEC61A1; SEC63; SLC33A1; TIA1; TMED2; ACSS2; CPOX; CSTA; DBI; FADS1; HIST1H4B; HIST1H4E; MYL6B; AN…
Salivary glands	304	6607	41.989	1.16284	0.000497849	0.422176	0.00394557	0.0128134	AAED1; ALDOA; ALOX5; ANXA1; BAZ1A; BCL2A1; BCL6; BHLHE40; BIRC3; C5AR1; CASP7; CD44; CD55; CD83; CDC42EP3; CECR2; CELSR2; CHIC2; CMTM2; CSF2RB; CXCR2; DGAT2; DHODH; ELMSAN1; ERBB2; ERGIC1; EVI2B; F2RL1; FADS2; FAM102B; FAM129A; FAM65B; FASN; FCER1G; FGR; FLT1; FOSL2; G0S2; GATA4; GATAD2A; GPR160; GPR27; HAVCR2; HCK; HSD17B14; HSPA6; ICAM1; IL18RAP; IL1R2; IL1RN; IRF1; KCNJ15; KIAA0226L; KRT8; LIT…
Testis	456	10269	62.9834	1.12223	7.7906e-05	0.0660643	0.000805662	0.00261642	AAED1; ACVR2B; ADRB2; AKAP12; ALDOA; ALOX5; ANXA1; ARHGAP30; ARRDC3; BASP1; BAZ1A; BBOX1; BCL2A1; BCL6; BHLHE40; BIRC3; C10orf10; C5AR1; CASP7; CCL4; CD44; CD55; CD83; CDC42EP3; CECR2; CELSR2; CHIC2; CMTM2; CNDP1; CSF2RB; CSF3R; CXCR2; DGAT2; DHODH; DNMBP; DTX4; EFHD2; ELMSAN1; EMP1; EMP3; ENO3; ERBB2; ERGIC1; EVI2B; F2RL1; FADS2; FAM102B; FAM107A; FAM129A; FAM65B; FASN; FCER1G; FCN1; FGR; FLT1; …
MDA231	25	336	3.45304	1.88104	0.00194656	1	0.0129975	0.0422099	ALDOA; CD44; COTL1; FASN; HMGA1; SOD2; S100A11; SDC4; TAGLN2; HSP90B1; HIST1H2BF; HIST1H4B; HIST1H4E; HIST2H2AC; MYL6B; PRSS3; CYR61; IL6; LAMC2; LCN2; LDLR; NAMPT; PTX3; SERPINE1; SPTBN1;
Urothelial cancer	372	7521	51.3812	1.25001	8.04635e-09	6.8233e-06	4.64892e-07	1.50976e-06	AAED1; ACVR2B; ADRB2; AKAP12; ALDOA; ALOX5; ANXA1; BAZ1A; BBOX1; BCL2A1; BCL6; BHLHE40; BIRC3; C10orf10; C5AR1; CASP7; CCL4; CD44; CD55; CD83; CDC42EP3; CDHR2; CECR2; CELSR2; CHIC2; CMTM2; CNDP1; CSF2RB; CSF3R; CXCR2; DGAT2; DHODH; ELMSAN1; ENO3; ERBB2; ERGIC1; EVI2B; F2RL1; FADS2; FAM102B; FAM129A; FAM65B; FASN; FCER1G; FCN1; FGR; FLT1; FOSL1; FOSL2; G0S2; GATA4; GATAD2A; GPR160; GPR27; HAVCR2; …
R	64	1948	8.83978	0.830409	0.955365	1	1	1	ALDOA; ANXA1; COTL1; DNMBP; EFHD2; FASN; GATAD2A; HMGA1; KRT8; PKLR; PTPN1; RAB5C; S100A11; SERPINB9; SIN3A; STAT3; TAGLN2; TGFB1; VASP; YBX3; ZYX; CANX; CBX5; CLIC4; HSP90B1; MCFD2; EIF4A2; RAP1GDS1; SEC22B; TWF1; P4HA1; ACSS2; CPOX; DBI; HIST1H4B; HIST1H4E; HIST2H2AB; KIF22; MYL6B; ANXA2; ARG2; ATP1B3; CNN1; CT47A7; GAGE12B; GAGE12C; GAGE12F; GAGE2B; GAGE2C; GAGE4; GAGE5; GAGE7; HOMER1; JUNB; K…
Soft tissue	340	6969	46.9613	1.23298	4.24001e-07	0.000359553	9.98758e-06	3.24351e-05	AAED1; ACVR2B; AKAP12; ALDOA; ALOX5; ANXA1; ARHGAP30; BAZ1A; BBOX1; BCL2A1; BCL6; BHLHE40; C10orf10; CASP7; CCL4; CD44; CD55; CD93; CDC42EP3; CECR2; CELSR2; CHIC2; CMTM2; CSF2RB; CSF3R; DGAT2; DHODH; ELMSAN1; ERGIC1; EVI2B; F2RL1; FADS2; FAM102B; FAM129A; FASN; FCER1G; FCGR2A; FGR; FLT1; FOSL2; G0S2; GATA4; GATAD2A; GPR27; HAVCR2; HLA-DPA1; HMOX1; HSD17B14; HSPA6; ICAM1; IL17RA; IL18RAP; IL1R2; I…
Testis cancer	349	7248	48.2044	1.2169	1.05762e-06	0.000896861	2.24215e-05	7.2815e-05	AAED1; ACVR2B; ADRB2; AKAP12; ALDOA; ALOX5; ANXA1; ARHGAP30; BAZ1A; BBOX1; BCL2A1; BCL6; BHLHE40; BIRC3; C5AR1; CASP7; CCL4; CD44; CD55; CD83; CD93; CDC42EP3; CECR2; CELSR2; CHIC2; CMTM2; CNDP1; CSF2RB; DGAT2; DHODH; ELMSAN1; ENO3; ERBB2; ERGIC1; EVI2B; F2RL1; FAM102B; FAM129A; FAM65B; FASN; FCER1G; FGR; FLT1; FOSL1; FOSL2; FPR2; G0S2; GATA4; GATAD2A; GPR160; GPR27; HAVCR2; HCK; HLA-DPA1; HMOX1; …
Neutrophil	113	2031	15.6077	1.40618	0.000104831	0.0888964	0.00103368	0.00335692	ALDOA; ALOX5; ALOX5AP; ANXA1; BASP1; CD44; CD55; CETP; CFP; CLC; CNDP1; CORO1A; COTL1; CR1; DEFA1B; DEFA1; DPEP2; EFHD2; FASN; FCGR3B; FCN1; GCA; GLIPR2; HMGA1; ICAM1; ITGAM; ITGB2; KRT8; LMNB1; SOD2; LSP1; LYN; LYZ; MGAM; MMP19; MMP9; MNDA; MYADM; NCF2; NCF4; PADI4; PLAUR; PLBD1; PLEK; PPP1R18; QPCT; RAB11FIP1; RAB5C; RAC2; S100A11; S100A12; S100A4; S100A6; S100A8; S100A9; S100P; SELL; SERPINB9;…
CD8	128	3327	17.6796	0.972356	0.655299	1	1	1	ALDOA; ALOX5; ALOX5AP; ANXA1; ARHGAP30; BASP1; BAZ1A; CD44; CFP; CNDP1; CORO1A; COTL1; DEFA1B; DEFA1; DHODH; DNMBP; DOK3; EFHD2; EVI2B; FAM101B; FAM129A; FAM65B; FASN; FCER1G; GATAD2A; GLIPR2; HCK; HLA-DPA1; HMGA1; ICAM1; ITGAM; ITGB2; KRT8; LMNB1; SOD2; MAP2K3; LSP1; LYN; LYZ; MMP9; MNDA; MOB3A; MYADM; MYO1F; NFATC2; PKLR; PLEK; PPP1R18; PTPN1; RAB5C; RAC2; RASSF5; S100A11; S100A4; S100A6; S100A…
Stomach cancer	367	7399	50.6906	1.25354	8.22333e-09	6.97338e-06	4.64892e-07	1.50976e-06	ACVR2B; AKAP12; ALDOA; ALOX5; ANXA1; BAZ1A; BBOX1; BCL2A1; BCL6; BHLHE40; BIRC3; C10orf10; C5AR1; CASP7; CCL4; CD44; CD55; CD83; CDC42EP3; CDHR2; CECR2; CELSR2; CHIC2; CMTM2; CSF2RB; DGAT2; DHODH; ELMSAN1; ENO3; ERBB2; ERGIC1; EVI2B; F2RL1; FADS2; FAM102B; FAM129A; FAM65B; FASN; FCER1G; FGR; FLT1; FOSL1; FOSL2; FPR2; G0S2; GATA4; GATAD2A; GPR160; GPR27; HAVCR2; HCK; HMOX1; HSD17B14; HSPA6; ICAM1;…
Skin cancer	338	7029	46.6851	1.21526	2.28914e-06	0.00194119	4.13019e-05	0.00013413	ACVR2B; ALDOA; ALOX5; ANXA1; BAZ1A; BBOX1; BCL2A1; BCL6; BHLHE40; BIRC3; C5AR1; CASP7; CCL4; CD44; CD55; CD83; CDC42EP3; CECR2; CELSR2; CHIC2; CMTM2; CSF2RB; CXCR2; DHODH; ELMSAN1; ERBB2; ERGIC1; EVI2B; F2RL1; FADS2; FAM102B; FAM129A; FASN; FGR; FLT1; FOSL1; FOSL2; G0S2; GATA4; GATAD2A; GPR160; GPR27; HCK; HLA-DPA1; HSPA6; ICAM1; IL17RA; IL18RAP; IL1R2; IL1RN; IRF1; ITGAM; JUND; KCNJ15; KIAA0226L…
Adrenal glands	349	7554	48.2044	1.1676	7.30132e-05	0.0619152	0.000764385	0.00248238	AAED1; ACVR2B; AKAP12; ALDOA; ALOX5; ANXA1; ARHGAP30; AVPR1A; BAZ1A; BCL2A1; BHLHE40; C10orf10; C5AR1; CASP7; CCL4; CD44; CD55; CDC42EP3; CDHR2; CECR2; CELSR2; CETP; CHIC2; CMTM2; CSF2RB; CSF3R; DGAT2; DHODH; ELMSAN1; ENO3; ERBB2; ERGIC1; EVI2B; F2RL1; FADS2; FAM102B; FAM129A; FAM65B; FASN; FCER1G; FCN1; FGR; FLT1; FOSL2; FPR2; GATA4; GATAD2A; GPR27; HAVCR2; HMOX1; HSD17B14; HSPA6; ICAM1; IL17RA;…
TOV112D	65	1276	8.9779	1.28754	0.0212879	1	0.106817	0.346894	ALDOA; ANXA1; BASP1; CD44; CELSR2; COTL1; CXCL1; EFHD2; FASN; ICAM1; KRT8; LMNB1; SOD2; MMP19; S100A11; S100A4; SDC4; SGCE; SIN3A; SORT1; TAGLN2; TGFB1; VASP; YBX3; ZYX; CANX; CBX5; CLIC4; COL1A2; HSP90B1; LPP; EIF4A2; SEC22B; TWF1; P4HA1; IGFBP2; GDF15; CPOX; DBI; HIST1H2BF; HIST1H4B; HIST1H4E; HIST2H2AB; ANXA2; CYR61; IL6; LAMC2; LCN2; LDLR; MCAM; NAMPT; OSMR; PTX3; PVR; RRP12; SEMA4B; SERPINA1…
LNCaP	80	1455	11.0497	1.38968	0.00162687	1	0.0111257	0.0361311	ALDOA; CELSR2; EFHD2; ENO3; ERBB2; FASN; HMGA1; KRT8; LMNB1; SOD2; S100A11; S100A9; SDC4; STC1; TAGLN2; YBX3; ZYX; CANX; CBX5; CLIC4; CPD; HSP90B1; LMAN1; LPP; MANEA; MCFD2; EIF4A2; PTPRS; SEC22B; SEC63; TIA1; TWF1; NCAM2; IGFBP2; GDF15; CDH15; CPOX; DBI; EPHA1; HIST1H1A; HIST1H1E; HIST1H2BF; HIST1H3C; HIST1H4B; HIST1H4E; HIST2H2AB; HIST2H2AC; MB; MYL6B; ACOT1; ACTG2; ADAMTS1; ARG2; ATP1B3; CCL20…
Corpus, uterine	329	6997	45.442	1.18832	3.25361e-05	0.0275906	0.000383203	0.00124447	ACVR2B; AKAP12; ALDOA; ALOX5; ANXA1; BAZ1A; BBOX1; BCL2A1; BCL6; BHLHE40; C10orf10; C5AR1; CASP7; CCL4; CD44; CD55; CDC42EP3; CDHR2; CECR2; CELSR2; CHIC2; CMTM2; CR1; CSF2RB; DGAT2; DHODH; ELMSAN1; ERBB2; ERGIC1; EVI2B; F2RL1; FADS2; FAM102B; FAM129A; FAM65B; FASN; FCER1G; FGR; FLT1; FOSL1; FOSL2; G0S2; GATA4; GATAD2A; GPR160; GPR27; HAVCR2; HCK; HLA-DPA1; HMOX1; HSPA6; ICAM1; IL17RA; IL18RAP; IL…
Appendix	345	7004	47.6519	1.24486	1.01333e-07	8.59306e-05	2.80528e-06	9.11028e-06	ACVR2B; ALDOA; ALOX5; ALOX5AP; ANXA1; ARHGAP30; BAZ1A; BBOX1; BCL2A1; BCL6; BHLHE40; BIRC3; C10orf10; C5AR1; CASP7; CCL4; CD44; CD55; CD83; CDC42EP3; CDHR2; CECR2; CELSR2; CHIC2; CMTM2; CR1; CSF2RB; DGAT2; DHODH; ELMSAN1; ENO3; ERBB2; ERGIC1; EVI2B; F2RL1; FADS2; FAM102B; FAM129A; FAM65B; FASN; FCER1G; FGR; FLT1; FOSL2; FPR2; G0S2; GATA4; GATAD2A; GPR27; HAVCR2; HCK; HLA-DPA1; HMOX1; HSD17B14; HS…
Erythrocytes	39	1539	5.38674	0.640575	0.999397	1	1	1	ALDOA; ANXA1; DEFA1B; DEFA1; EFHD2; FASN; FCN1; GCA; GLIPR2; HSPA6; MAP2K3; LSP1; LYZ; PKLR; RAB5C; S100A11; S100A4; S100A6; S100A8; S100A9; TAGLN2; VASP; YBX3; GSTT1; SEPSECS; TMEM50B; TWF1; ACSS2; CSTA; GINS2; HIST1H3C; HIST1H4B; HIST1H4E; MYL6B; TP53I3; ANXA2; NAMPT; NFE2; TGM2;
HTB75	68	1277	9.39227	1.3459	0.00746382	1	0.041916	0.136124	ALDOA; ANXA1; BASP1; CD44; CXCL1; CXCL3; EFHD2; FASN; ICAM1; KRT8; LMNB1; SOD2; METRNL; PLAUR; QPCT; S100A11; SDC4; SLC2A3; SORT1; STAT3; STC1; TAGLN2; TGFB1; YBX3; ZYX; CANX; CBX5; CLIC4; EFEMP1; HSP90B1; MCFD2; EIF4A2; NT5E; SEC22B; TIA1; TMED2; TWF1; P4HA1; IGFBP2; DBI; HIST1H2BF; HIST1H4B; HIST1H4E; HIST2H2AB; HIST2H2AC; MYL6B; WNT5A; ANXA2; CYR61; FSTL3; IL6; LAMC2; LCN2; MAP1B; MCAM; MTHFD2…
Smooth muscle cells	231	5124	31.9061	1.13935	0.0101768	1	0.0536019	0.174075	AAED1; ACVR2B; AKAP12; ALDOA; ALOX5; ARHGAP30; BAZ1A; BCL2A1; CCL4; CD44; CD55; CD83; CD93; CDC42EP3; CECR2; CELSR2; CMTM2; DHODH; ELMSAN1; ERGIC1; F2RL1; FADS2; FAM129A; FCER1G; FGR; FLT1; FOSL2; GATA4; GATAD2A; GPR160; GPR27; HAVCR2; HLA-DPA1; HMOX1; HSD17B14; HSPA6; IL18RAP; IL1R2; IL1RN; KCNJ15; KIAA0226L; LITAF; LMNB1; SOD2; MAMDC4; MAP1LC3A; MAP3K14; ZC3H12A; SLC16A3; MLXIP; MPND; MXD1; NFA…
Thymocyte	2	48	0.276243	1.05803	0.57155	1	1	1	PPP3R1; CXCR4;
Gastric juice	20	243	2.76243	2.08093	0.00165877	1	0.0112531	0.0365449	ALDOA; ANXA1; DEFA3; ENO3; IL1RN; KRT8; SOD2; LYZ; S100A6; S100A8; S100A9; S100P; CSTA; HIST1H4B; HIST1H4E; PRSS3; ANXA2; LCN2; PNLIP; SERPINA1;
Urine	185	3267	25.5525	1.43113	8.34367e-08	7.07544e-05	2.43981e-06	7.92338e-06	ALDOA; ALOX5AP; ANXA1; BASP1; BBOX1; CD44; CD55; CD83; CD93; CDC42BPA; CDHR2; CELSR2; CETP; CLEC7A; CORO1A; COTL1; CR1; CSF3R; CST7; CXCR2; DEFA1B; DEFA3; DEFA1; ENO3; FAM102B; FAM129A; FAM65B; FASN; FCGR3B; GCA; GLIPR2; HAVCR2; HIVEP1; HMOX1; HSPA6; ICAM1; IL1R2; IL1RN; ITGAM; ITGB2; ITPKC; KRT8; LMNB1; SOD2; CREB5; LRRK2; LSP1; LYZ; MGAM; MMP25; MMP9; MNDA; MYO1F; NRIP1; PADI4; PKLR; PLAUR; PLB…
Heart	249	5507	34.3923	1.14271	0.00613509	1	0.0346837	0.112637	ADRB2; ALDOA; ALOX5; ARRDC3; AVPR1A; BASP1; BAZ1A; BHLHE40; BIRC3; CASP7; CDC42BPA; CECR2; CETP; CLPTM1; COTL1; CST7; DGAT2; DNMBP; DTX4; ELMSAN1; EMP1; EMP3; ENO3; ERBB2; ERGIC1; F2RL1; FAM107A; FAM129A; FRAT2; GATA4; GATAD2A; GLIPR2; GPR27; IL17RA; ITPKC; ITPRIP; LITAF; LMNB1; SOD2; MAP2K3; LPGAT1; LRRK2; MAP1LC3A; MAP3K14; SLC16A3; BCL3; MLXIP; MMP19; MXD1; MYADM; NFATC2; PDE11A; PDE4B; PEG10;…
Amygdala	41	1204	5.66298	0.860786	0.863724	1	1	1	ARRDC3; CECR2; DNMBP; DTX4; ERGIC1; GPR27; ITPRIP; PEG10; PROK2; RAB26; RND1; SBNO2; THEMIS2; TM6SF2; ZBTB21; CNTN3; SYT17; ZNF652; NCAM2; GRID1; ACBD5; DBI; NINL; NLGN4Y; OSGIN1; PCDH18; RBP5; ZGPAT; ATP1B3; BEND3; CYR61; FGF14; GFPT2; GFRA3; IER3; IL2RA; NRG1; PHYHIPL; RASL10A; SEMA4B; SYNE2;
Red blood cells	6	166	0.828729	0.914905	0.646393	1	1	1	CD44; CD52; CR1; SLC29A1; MT1A; PLSCR1;
Thyroid gland	344	7306	47.5138	1.18994	1.45215e-05	0.0123143	0.000195464	0.00063478	AAED1; ACVR2B; ADRB2; AKAP12; ALDOA; ALOX5; ANXA1; BAZ1A; BBOX1; BCL2A1; BCL6; BHLHE40; BIRC3; C10orf10; C5AR1; CCL4; CD44; CD55; CD93; CDC42EP3; CECR2; CELSR2; CHIC2; CMTM2; CNDP1; CSF2RB; CXCL1; CXCR2; DGAT2; DHODH; ELMSAN1; ENO3; ERBB2; ERGIC1; EVI2B; F2RL1; FADS2; FAM102B; FAM129A; FAM65B; FASN; FCER1G; FGR; FLT1; FOSL2; FPR2; G0S2; GATA4; GATAD2A; GPR27; HAVCR2; HCK; HMOX1; HSD17B14; HSPA6; …
H460	42	736	5.8011	1.44246	0.0112565	1	0.0589227	0.191354	ALDOA; ANXA1; BASP1; CD44; CD55; CXCL1; EFHD2; LMNB1; QPCT; S100A11; SERPINB9; STC1; TAGLN2; TGFB1; CANX; EFEMP1; HSP90B1; LMAN1; P4HA1; IGFBP2; GDF15; DBI; HIST1H4B; HIST1H4E; HIST2H2AC; ADAM19; ADAMTS1; ANXA2; CYR61; FSTL3; IL6; LDLR; MAP1B; MCAM; MMP10; NAMPT; PAPPA; PTX3; PVR; SERPINB2; SPTBN1; SRGN;
Heart muscle	279	6191	38.5359	1.13892	0.00385234	1	0.0236723	0.076877	AAED1; ACVR2B; ALDOA; ALOX5; ANXA1; BAZ1A; BCL2A1; BHLHE40; C10orf10; CD55; CDC42EP3; CDHR2; CECR2; CELSR2; CHIC2; CMTM2; CNDP1; CSF2RB; CSF3R; CXCR2; DGAT2; DHODH; ELMSAN1; ENO3; ERBB2; ERGIC1; EVI2B; F2RL1; FADS2; FAM102B; FAM129A; FAM65B; FASN; FCER1G; FGR; FLT1; FOSL1; FOSL2; GATA4; GATAD2A; GPR160; GPR27; HAVCR2; HMOX1; HSD17B14; HSPA6; IL18RAP; IL1R2; IL1RN; IRF1; ITGB2; KCNJ15; KIAA0226L; …
B Cell	125	2254	17.2652	1.4016	4.86524e-05	0.0412573	0.000550097	0.00178647	ALDOA; ALOX5; ALOX5AP; ANXA1; BASP1; BCL2A1; BCL6; CCL4; CD44; CD52; CORO1A; COTL1; CR1; CSF3R; DEFA1B; DEFA1; DHODH; DNMBP; EFHD2; ERGIC1; FAM129A; FASN; FCER1G; FCN1; FGR; GCA; GLIPR2; HIVEP1; HLA-DPA1; HMGA1; IL1R2; ITGAM; ITGB2; KRT8; LAPTM5; LILRB2; LMNB1; SOD2; LPGAT1; LSP1; LYN; LYZ; MGAM; BCL3; MMP9; MNDA; MX2; MYO1F; NCF4; PADI4; PDE4B; PLEK; PTPN1; QPCT; RAB5C; RAC2; RELB; RFX2; S100A11…
Spinal cord	46	1465	6.35359	0.793683	0.962771	1	1	1	ALOX5AP; ARRDC3; DGAT2; DNMBP; DTX4; ERGIC1; GPR27; ITPRIP; LRRK2; NFIL3; PDE11A; PEG10; PILRA; PROK2; RND1; SBNO2; SORT1; TM6SF2; SYT17; ZNF652; GRID1; ACBD5; CDH15; GRIA3; KCNK5; NINL; NLGN4Y; PCDH18; RBP5; ZGPAT; ATP1B3; BACH2; CALCA; CYR61; GFPT2; GFRA3; GPM6B; GPRC5A; IER3; IL2RA; KLF11; NCOA7; NR4A1; PHYHIPL; SEMA4B; SYNE2;
Malignant glioma	345	7169	47.6519	1.21621	1.41961e-06	0.00120383	2.79961e-05	9.09187e-05	AAED1; ACVR2B; AKAP12; ALDOA; ALOX5; ANXA1; ARHGAP30; BAZ1A; BBOX1; BCL2A1; BCL6; BHLHE40; BIRC3; C10orf10; C5AR1; CCL4; CD44; CD55; CD83; CDC42EP3; CDHR2; CECR2; CELSR2; CHIC2; CMTM2; CNDP1; CSF2RB; CXCR2; DHODH; ELMSAN1; ENO3; ERBB2; ERGIC1; EVI2B; F2RL1; FADS2; FAM102B; FAM129A; FAM65B; FASN; FGR; FLT1; FOSL1; FOSL2; GATA4; GATAD2A; GPR160; GPR27; HAVCR2; HCK; HLA-DPA1; HMOX1; HSD17B14; HSPA6;…
Cervical cancer	364	7426	50.2762	1.23878	4.80365e-08	4.07349e-05	1.6294e-06	5.29154e-06	AAED1; ACVR2B; ADRB2; AKAP12; ALDOA; ALOX5; ANXA1; ARHGAP30; BAZ1A; BBOX1; BCL2A1; BCL6; BHLHE40; BIRC3; C10orf10; C5AR1; CASP7; CCL4; CD44; CD55; CD83; CDC42EP3; CDHR2; CECR2; CELSR2; CHIC2; CMTM2; CSF2RB; CXCR2; DGAT2; DHODH; ELMSAN1; ERBB2; ERGIC1; EVI2B; F2RL1; FADS2; FAM102B; FAM129A; FAM65B; FASN; FCN1; FGR; FLT1; FOSL1; FOSL2; FPR2; G0S2; GATA4; GATAD2A; GPR160; GPR27; HCK; HLA-DPA1; HSPA6…
Malignant melanoma	365	7459	50.4144	1.23669	5.53497e-08	4.69365e-05	1.80525e-06	5.86264e-06	AAED1; ACVR2B; AKAP12; ALDOA; ALOX5; ANXA1; BAZ1A; BBOX1; BCL2A1; BCL6; BHLHE40; BIRC3; C10orf10; C5AR1; CCL4; CD44; CD55; CD83; CDC42EP3; CECR2; CELSR2; CHIC2; CMTM2; CNDP1; CSF2RB; DHODH; ELMSAN1; ENO3; ERBB2; ERGIC1; EVI2B; F2RL1; FAM102B; FAM129A; FAM65B; FASN; FCER1G; FCN1; FGR; FLT1; FOSL1; FOSL2; FPR2; G0S2; GATA4; GATAD2A; GPR160; GPR27; HAVCR2; HCK; HLA-DPA1; HMOX1; HSD17B14; HSPA6; ICAM…
Oesophagus	66	921	9.11602	1.81126	2.12858e-06	0.00180503	4.01118e-05	0.000130265	ALOX5; BAZ1A; CD44; CECR2; ELMSAN1; EMP1; ERBB2; IL1RN; JUND; SOD2; MAP3K14; BCL3; MXD1; PPP3R1; RPS6KA5; S100A12; S100A6; S100A8; SIGIRR; SOX17; SP1; STAT3; TRAF4; VASP; CANX; CYP3A5; MEIS2; NAT2; MYC; FOS; AMOT; BRCA1; CSTA; GIMAP2; LAMA4; NINL; OGG1; OSGIN1; PRKCZ; RPS4Y1; TPPP2; ANXA2; CDKN1A; FRMD6; GAD2; GPM6B; HSPB6; IER3; IL1B; IL4R; JUN; JUNB; KLF6; LAMC2; MAP3K8; MCAM; MMP10; MUC17; MYH…
Embryonal carcinoma cells	56	1232	7.73481	1.14891	0.153548	1	0.45848	1	ALDOA; BASP1; CD44; CD55; CLPTM1; DHODH; ERBB2; ERGIC1; FADS2; FASN; HSPA6; KRT8; LYN; MYADM; RAB5C; SDC4; SLC2A3; SORT1; VASP; YBX3; CANX; CPD; HSP90B1; LMAN1; PTPRS; SEC22B; SEC63; TMED2; TRAM1; ACBD5; ELFN1; EPHA1; GNAO1; HIST1H2BF; HIST1H3C; HIST1H4B; HIST1H4E; HIST2H2AB; PKD2; SLC29A1; ATP1B3; ATP2B4; EPHA2; GFPT2; GNL3; LDLR; MAP1B; MCAM; MYH11; PPAP2B; PVR; SIRPA; SLC7A1; SPRY4; SPTBN1; XR…
ES2	133	3527	18.3702	0.953044	0.749807	1	1	1	AKAP12; ALDOA; ANXA1; BASP1; CD44; CDC42EP3; CNDP1; COTL1; CXCL1; CXCL3; DNMBP; EFHD2; ENO3; ERGIC1; FAM129A; FASN; FOSL1; G0S2; GATAD2A; GLIPR2; HMGA1; ICAM1; ITGB2; KRT8; LMNB1; SOD2; MAP2K3; LPGAT1; LRRK2; LYZ; METRNL; MYADM; PEG10; PKLR; PLAUR; PPP1R18; PTPN1; QPCT; RAB5C; RAC2; S100A11; S100A6; SELL; SLC25A37; SLC2A14; SLC2A3; SP1; STC1; TAGLN2; TIE1; VASP; WASL; YBX3; ZYX; CANX; CBX5; CLIC4…
Ovary	396	8592	54.6961	1.16479	1.25233e-05	0.0106198	0.000171287	0.000556263	ACVR2B; ADSSL1; AKAP12; ALDOA; ALOX5; ANXA1; ARRDC3; BASP1; BAZ1A; BCL2A1; C10orf10; C5AR1; CASP7; CD44; CD55; CDC42EP3; CDHR2; CECR2; CELSR2; CMTM2; CORO1A; COTL1; CSF2RB; CST7; DEFA3; DEFA1; DGAT2; DHODH; DNMBP; DTX4; EFHD2; ELMSAN1; EMP1; EMP3; ENO3; ERBB2; ERGIC1; EVI2B; F2RL1; FAM102B; FAM129A; FAM65B; FASN; FCER1G; FGR; FLT1; FOSL1; FOSL2; GATA4; GATAD2A; GCA; GPR160; GPR27; HAVCR2; HCK; HM…
Liver cancer	376	7697	51.9337	1.23456	3.1059e-08	2.6338e-05	1.25419e-06	4.07304e-06	AAED1; ACVR2B; ALDOA; ALOX5; ANXA1; ARHGAP30; BAZ1A; BBOX1; BCL2A1; BCL6; BHLHE40; BIRC3; C10orf10; C5AR1; CASP7; CCL4; CD44; CD55; CD83; CDC42EP3; CDHR2; CECR2; CELSR2; CHIC2; CMTM2; CNDP1; CSF2RB; CSF3R; DGAT2; DHODH; ELMSAN1; ENO3; ERBB2; ERGIC1; EVI2B; F2RL1; FADS2; FAM102B; FAM129A; FAM65B; FASN; FCER1G; FGR; FLT1; FOSL1; FOSL2; FPR2; G0S2; GATA4; GATAD2A; GPR160; GPR27; HAVCR2; HCK; HMOX1; …
Dendritic cells	117	1954	16.1602	1.51332	2.79493e-06	0.0023701	4.74021e-05	0.000153941	ALDOA; ANXA1; ARHGAP30; BASP1; BCL6; CCR1; CD44; CD83; CD93; CLEC7A; CORO1A; COTL1; CR1; CST7; CXCL1; EFHD2; ENO3; FAM129A; FASN; FCER1G; FGR; GCA; GLIPR2; HCK; HLA-DPA1; HMGA1; HMOX1; ICAM1; IL1RN; ITGAM; ITGB2; LILRB2; LMNB1; SOD2; LSP1; LST1; LYZ; SLC16A3; BCL3; MMP9; MNDA; MOB3A; MX2; MYO1F; NCF1; NCF2; NCF4; PECAM1; PILRA; PLEK; PLEKHO2; PPP1R18; PTPRE; RAB5C; RAC2; RELB; S100A11; S100A4; S1…
OVCAR3	141	3714	19.4751	0.959494	0.726962	1	1	1	ADRB2; AKAP12; ALDOA; ANXA1; BASP1; CASP7; CD44; CD55; CELSR2; CLPTM1; CORO1A; COTL1; CXCL1; DEFA1B; DEFA3; DEFA1; DHODH; EFHD2; ERGIC1; FAM129A; FASN; GCA; GLIPR2; HSPA6; ICAM1; KIAA0226L; KRT8; LMNB1; SOD2; MAP2K3; LYZ; METRNL; SLC16A3; MYADM; PLAUR; PRAP1; PRKCI; PTPN1; RAB5C; S100A11; S100A4; S100A6; S100A8; S100P; SDC4; SGCE; SORT1; SOX17; TAGLN2; TPPP; VASP; WASL; YBX3; ZYX; CANX; CBX5; CLI…
Huh7	104	2976	14.3646	0.883235	0.930343	1	1	1	AKAP12; BCL6; CASP7; CELSR2; EFHD2; ENO3; ERGIC1; FAM102B; FAM65B; FASN; FCN1; FLT1; FOSL2; FRAT2; GCA; GPR27; HCAR3; ICAM1; LMNB1; LST1; BCL3; MNDA; MPEG1; MPND; MX2; MYADM; PEG10; PLK2; PLXNC1; PRKCI; R3HDM4; RIPK4; S100A11; SELL; SERTAD1; SLC16A6; SOX7; SPIDR; TLE3; TLR2; TLR8; TRAF4; VASP; ZNF217; ZYX; CLIC4; CYP2C9; HSP90B1; FLRT2; LPP; SEPSECS; ABCC6; AFP; AMOT; CEBPA; CKAP2; CPOX; GCK; GIM…
Serum	287	7685	39.6409	0.943818	0.912011	1	1	1	ADRB2; ALDOA; ALOX5; ANXA1; ARRDC4; BASP1; BAZ1A; BIRC3; C16orf54; CD44; CD55; CDC42BPA; CECR2; CELSR2; CETP; CFP; CLPTM1; CNDP1; CORO1A; COTL1; CSF2RB; CSF3R; CST7; CXCR2; DEFA1B; DEFA3; DEFA1; DHODH; DNMBP; DPEP2; ELMSAN1; ENO3; F2RL1; FAM129A; FAM65B; FASN; FCAMR; FCGR2A; FCGR3B; FCN1; FLT1; FOSL1; FPR1; GATA4; GATAD2A; GCA; GLIPR2; HCK; HIVEP1; HMGA1; ICAM1; IL17RA; IL1RN; ITPKC; KCNJ15; KDM6…
Lens	44	1037	6.07735	1.07252	0.33611	1	0.793932	1	ALDOA; ALOX5; ANXA1; BASP1; CORO1A; COTL1; DOK3; EVI2B; FASN; HCK; HLA-DPA1; ITGB2; KRT8; LSP1; MOB3A; PLEK; PTPN1; RAC2; S100A11; S100A4; SERPINB9; TAGLN2; THEMIS2; TLE3; VASP; ZYX; CANX; CLIC4; HSP90B1; LMAN1; EIF4A2; RAP1GDS1; CRYAA; IFIT2; MYL6B; TP53I3; ANXA2; ARG2; ATP1B3; DPYSL3; NAMPT; SPTBN1; TGM2; TUBB6;
Breast	294	6413	40.6077	1.15861	0.000874578	0.741642	0.00656321	0.0213143	AAED1; ACVR2B; ADRB2; AKAP12; ALDOA; ALOX5; ANXA1; BAZ1A; BCL2A1; BCL6; BHLHE40; BIRC3; CASP7; CCL4; CD44; CD55; CDC42EP3; CECR2; CELSR2; CHIC2; CMTM2; CNDP1; CSF2RB; DGAT2; DHODH; ELMSAN1; ENO3; ERBB2; ERGIC1; EVI2B; FADS2; FAM102B; FAM129A; FASN; FGR; FLT1; FOSL2; GATA4; GATAD2A; GPR160; GPR27; HCK; HSPA6; ICAM1; IL1R2; IL1RN; IRF1; JUND; KCNJ15; KIAA0226L; KRT8; LITAF; LMNB1; SOD2; MAP2K3; MAM…
Hair	24	817	3.31492	0.742678	0.952566	1	1	1	ALDOA; ANXA1; FASN; KRT8; LMNB1; SOD2; RAB11FIP1; RAC2; S100A11; TAGLN2; WASL; CANX; HSP90B1; LPP; DBI; HIST1H3C; HIST1H4B; HIST1H4E; MREG; ANXA2; ATP2B4; KRT80; TACSTD2; TUBB6;
H520	33	843	4.55801	0.989574	0.551793	1	1	1	ALDOA; CD44; IL1R2; KRT8; LMNB1; QPCT; SGCE; TAGLN2; CANX; CLIC4; HSP90B1; PTPRS; IGFBP2; GDF15; DBI; HIST1H4B; HIST1H4E; HIST2H2AC; MYL6B; WNT5A; ADAM19; ANXA2; ATP1B3; DPYSL3; MAP1B; NAMPT; NPTX2; PTX3; PVR; SPTBN1; THBS1; TUBB6; VCAN;
Nipple aspirate fluid	52	754	7.18232	1.74319	7.21736e-05	0.0612032	0.000764385	0.00248238	ALDOA; ANXA1; BASP1; CD44; CD55; CFP; CORO1A; DEFA1B; DEFA3; DEFA1; FASN; HMGA1; ICAM1; KRT8; SOD2; LYN; LYZ; PLAUR; S100A11; S100A12; S100A6; S100A8; S100A9; S100P; SDC4; SORT1; STC1; TAGLN2; TLR2; COL1A2; CPD; EFEMP1; HLA-DQA1; HSP90B1; NCAM2; IGFBP2; GDF15; DBI; HIST1H2BF; HIST2H2AC; MYL6B; ANXA2; CHI3L1; FZD7; IL1RL1; LAMC2; LCN2; SEMA4B; SERPINA1; SIRPA; TGM2; THBS1;
Uterus	45	917	6.21547	1.24042	0.0798377	1	0.300725	0.97662	AVPR1A; DGAT2; EMP3; F2RL1; FAM107A; FAM129A; FCN1; GLIPR2; PRAP1; PROK2; S100A11; SIGIRR; HMBOX1; MTMR4; NAT2; BRCA1; C9orf24; GIMAP2; HOPX; LAMA4; OSGIN1; PAQR7; RBP5; TBX10; TBX3; AGPAT9; ATP1B3; CHSY3; FSTL3; GADD45B; GFRA3; GPRC5A; IER3; LCN2; NCOA7; OLR1; PFKFB3; PLSCR1; SERPINA1; SPRY4; SYNE2; TAGLN; TGFB3; URB2; VCAN;
Tracheobronchial cells	4	47	0.552486	2.15571	0.114348	1	0.372951	1	ANXA1; BASP1; TAGLN2; ANXA2;
T24	14	123	1.9337	2.87828	0.000364147	0.308797	0.00305739	0.00992903	ALDOA; CD44; COTL1; SOD2; SDC4; TAGLN2; EFEMP1; AFP; CYR61; IL6; PTX3; SERPINE1; SRGN; TAGLN;
CPE_SCX_fractionated	59	2331	8.14917	0.63976	0.999975	1	1	1	ALDOA; ANXA1; BAZ1A; CASP7; CD55; CORO1A; COTL1; DNMBP; EFHD2; FASN; JUND; PPP3R1; PRKCI; PTPN1; RAC2; S100A11; S100A6; S100A8; SERPINB9; STAT3; TAGLN2; TRAF4; VASP; ZYX; CANX; CLIC4; EFEMP1; HSP90B1; LMAN1; LPP; RAP1GDS1; TIA1; ZNF652; P4HA1; ACSS2; CPOX; EPHA1; FBXO2; HIST1H3C; PKD2; TBC1D2; TP53I3; ALDH1A3; ANXA2; ATP2B4; CDKN1A; KCNK1; LAMC2; LDLR; MTHFD2; NAMPT; RRP12; SERPINB2; SIRPA; SPTBN…
CRC	174	4247	24.0331	1.03544	0.310288	1	0.767126	1	AKAP12; ALDOA; ANXA1; BAZ1A; CD44; CELSR2; CLPTM1; CORO1A; COTL1; CXCL1; CXCL3; DHODH; EFHD2; ENO3; ERGIC1; FASN; FGR; GATAD2A; HCK; HMGA1; HMOX1; HSPA6; ICAM1; IL1R2; KRT8; LMNB1; SOD2; MAP2K3; CREB5; LYN; LYZ; MAP1LC3A; METRNL; MMP9; MYO1F; PECAM1; PKLR; PLAUR; PLBD1; PPP1R18; PPP3R1; PTPN1; QPCT; RAB5C; RAC2; S100A11; S100A4; S100A6; S100P; SDC4; SERPINB9; SGCE; SLC2A14; SLC2A3; SORT1; STAT3; …
Preadipocytes	49	510	6.76796	2.42852	9.48763e-09	8.04551e-06	5.02844e-07	1.63301e-06	AKAP12; ALDOA; ANXA1; BASP1; COTL1; CXCL1; FASN; HSPA6; ICAM1; IL1RN; SOD2; MMP19; MMP9; S100A11; S100A4; S100A6; S100A8; S100A9; SLC2A3; TAGLN2; TGFB1; TLR2; TNFAIP6; ZYX; COL1A2; EFEMP1; HSP90B1; P4HA1; IGFBP2; IGFBP1; AFP; DBI; ACOT1; ANXA2; CCL2; CCL3; F3; HSPB6; IL1B; IL1RL1; IL6; LIF; NAMPT; PHLDA1; SAA1; SERPINE1; SPTBN1; THBS1; VCAN;
Fetal hepatocytes	154	3784	21.2707	1.02857	0.359314	1	0.830017	1	AKAP12; ARHGAP30; BAZ1A; BCL6; BHLHE40; CD44; CD93; CELSR2; CFP; CLEC4E; CORO1A; COTL1; CSF3R; DNMBP; DOK3; ENO3; ERBB2; FASN; FLT1; HLA-DPA1; ICAM1; IL17RA; IL1R2; IL1RN; IRF1; ITGB2; LMNB1; SOD2; LRRK2; LSP1; MIDN; BCL3; MLXIP; MMP9; MNDA; MPND; MX2; NFATC2; NRIP1; PLEK; PLIN1; PLK2; PLXNC1; PTPN1; S100A11; S100A8; TLR2; TLR8; TPSAB1; TRAF4; TSLP; VASP; VNN3; WNT11; ZYX; CANX; CBX5; CLIC4; CYP2…
Amniotic fluid	51	566	7.0442	2.27754	3.88417e-08	3.29378e-05	1.43208e-06	4.65074e-06	ALDOA; ANXA1; BASP1; CD55; CDHR2; CNDP1; DEFA1B; DEFA3; DEFA1; FLT1; ICAM1; IL1R2; KRT8; LYZ; MMP19; MMP9; QPCT; S100A11; S100A8; S100A9; SELL; TAGLN2; COL1A2; EFEMP1; HSP90B1; NT5E; IGFBP2; GDF15; IGFBP1; AFP; CDH15; CPB2; DBI; HIST1H2BF; HIST1H4B; HIST1H4E; PRSS3; ADAMTS1; ANXA2; FSTL3; IL1RL1; LAMC2; LCN2; PVR; SERPINA1; SERPINB2; SERPINE1; TAGLN; TGM2; THBS1; VCAN;
Vulva/anal skin	298	6377	41.1602	1.181	0.000188128	0.159532	0.00173405	0.0056314	ACVR2B; ALDOA; ALOX5; ANXA1; ARHGAP30; BAZ1A; BBOX1; BCL2A1; BCL6; BHLHE40; BIRC3; C5AR1; CASP7; CD44; CD55; CDC42EP3; CECR2; CELSR2; CMTM2; CSF2RB; CXCR2; DHODH; ELMSAN1; ERBB2; ERGIC1; FADS2; FAM102B; FASN; FGR; FLT1; FOSL2; FPR2; G0S2; GATA4; GATAD2A; GPR160; GPR27; HLA-DPA1; HMOX1; HSPA6; IL17RA; IL18RAP; IL1R2; IL1RN; IRF1; ITGB2; JUND; KCNJ15; KIAA0226L; LITAF; LMNB1; SOD2; MAP2K3; LPGAT1; …
	58	1183	8.01105	1.23922	0.0529325	1	0.222212	0.721643	ACVR2B; ALDOA; ANXA1; BASP1; EFHD2; ERBB2; ERGIC1; FASN; FGR; HCK; HMGA1; HMOX1; HSPA6; ICAM1; LMNB1; LRRK2; LYN; LYZ; SLC16A3; RAB5C; RPS6KA5; S100A11; S100A8; S100A9; S100P; SERPINB9; TAGLN2; ZYX; CANX; CLIC4; HSP90B1; SEC22B; SEC61A1; SEC63; SLC33A1; TMED2; IGFBP1; C11orf52; CPOX; CSTA; EPHA1; HIST1H4B; HIST1H4E; ANXA2; ATP2B4; EPHA2; FSTL3; HSPB6; IRAK3; LIMK2; MYH11; PAPPA; SERPINA1; SERPINB…
HH4	109	2684	15.0552	1.0264	0.3986	1	0.894214	1	ADSSL1; ANXA1; AVPR1A; BAZ1A; BHLHE40; BIRC3; CD44; CD55; CELSR2; CLPTM1; COTL1; ENO3; FAM65B; FASN; HSPA6; ICAM1; IL17RA; LMNB1; MAP2K3; MIDN; ZC3H12A; MMP9; MPND; NFATC2; PIM3; PTPN1; RALGDS; RASSF5; RPS6KA5; S100A11; S100A8; SBNO2; SLC2A3; STC1; TIE1; TRAF4; WNT11; CANX; CBX5; CLIC4; EFEMP1; GLT8D1; HSP90B1; LMAN1; EIF4A2; NT5E; CYP7A1; P4HA1; IGFBP2; IGFBP1; ABCC6; CCDC150; CLGN; CPOX; GCK; L…
Ramos	56	1566	7.73481	0.903871	0.80857	1	1	1	ACVR2B; ALDOA; ALOX5AP; ANXA1; BIRC3; CORO1A; DNMBP; ERGIC1; FADS2; FASN; FGR; HMGA1; HSPA6; ICAM1; LMNB1; LYN; LYZ; MID1IP1; SLC16A3; QPCT; RAB5C; RASSF2; RPS6KA5; S100A8; S100A9; SEC14L1; SERPINB9; TAGLN2; CANX; CPD; HLA-DQA1; EIF4A2; SEC22B; SEC61A1; SEC63; SLC33A1; TIA1; TMED2; TMEM50B; TRAM1; P4HA1; CKAP2; CPOX; CSTA; FADS1; HIST1H4B; HIST1H4E; ZGPAT; ANXA2; ATP1B3; CXCR4; GADD45B; IVNS1ABP;…
Leukocytes	181	2845	25	1.60788	1.22941e-11	1.04254e-08	2.08507e-09	6.77138e-09	ADGRG3; ALDOA; ALOX5; ALOX5AP; ANXA1; ARHGAP30; BASP1; BAZ1A; BCL2A1; CASP7; CD44; CD83; CECR2; CFP; CLC; CLEC7A; CORO1A; COTL1; CST7; CXCL1; DEFA1B; DEFA3; DEFA1; DGAT2; DOK3; EFHD2; EMP3; FAM129A; FAM65B; FASN; FCN1; FGR; FRAT2; GCA; GLIPR2; GPR27; HCK; HMOX1; IL17RA; IL18RAP; IL1R2; ITGAM; ITGB2; LAPTM5; LILRB2; LITAF; LMNB1; MAP2K3; LPGAT1; LSP1; LST1; LYN; LYZ; MAP1LC3A; MAP3K14; MGAM; SLC16…
Renal cancer	351	7121	48.4807	1.2457	6.12584e-08	5.19471e-05	1.89087e-06	6.14069e-06	AAED1; ACVR2B; ADRB2; AKAP12; ALDOA; ALOX5; ANXA1; ARHGAP30; BAZ1A; BBOX1; BCL2A1; BCL6; BHLHE40; BIRC3; C10orf10; C5AR1; CASP7; CCL4; CD44; CD55; CD83; CD93; CDC42EP3; CDHR2; CECR2; CELSR2; CHIC2; CMTM2; CNDP1; CSF2RB; DGAT2; DHODH; ELMSAN1; ENO3; ERBB2; ERGIC1; EVI2B; F2RL1; FADS2; FAM102B; FAM129A; FAM65B; FASN; FCER1G; FGR; FLT1; FOSL2; FPR2; G0S2; GATA4; GATAD2A; GPR160; GPR27; HAVCR2; HCK; …
Aorta	27	530	3.72928	1.28788	0.108362	1	0.372951	1	ALDOA; CD55; SOD2; PROK2; SIGIRR; VASP; ZYX; HSP90B1; GIMAP2; HIST1H1E; OSGIN1; RBP5; ATP1B3; CNN1; GFRA3; HDC; IER3; KLF5; LCN2; MAP1B; RGS2; SERPINA1; SERPINB2; SPTBN1; SYNE2; TAGLN; THBS1;
Thyroid	56	889	7.73481	1.59219	0.000401338	0.340335	0.00327245	0.0106274	ALOX5; BAZ1A; BCL6; C5AR1; CD44; CD55; CECR2; ELMSAN1; ENO3; ERBB2; HCK; HMOX1; ICAM1; KRT8; SOD2; LYN; MAP3K14; MXD1; PPP3R1; RPS6KA5; S100A6; SELL; SORT1; SP1; STAT3; VASP; WASL; CANX; CNTN3; MEIS2; FOS; AMOT; NINL; PKD2; PRKCZ; RPS4Y1; TCAP; TPPP2; ANXA2; ARG2; ATF3; CDKN1A; CSF3; FRMD6; GAD2; GPM6B; IL4R; JUN; JUNB; LAMC2; MAP3K8; NFE2; PTGS2; SYN1; SYNE2; WT1;
hupo46_reference_cam	43	1042	5.93923	1.04312	0.409491	1	0.909027	1	ALDOA; CFP; CNDP1; CORO1A; EFHD2; FADS2; FASN; GLIPR2; ITGB2; LMNB1; SOD2; MYADM; PPP1R18; PTPN1; RAC2; TAGLN2; YBX3; CANX; HSP90B1; LMAN1; RAP1GDS1; SEC22B; ACBD5; FBXO2; GNAO1; HIST1H4B; HIST1H4E; MYL6B; RMND1; SLC29A1; ANXA2; ATP2B4; CXCR4; GAD2; MAP1B; PHYHIPL; SAA1; SERPINA1; SIRPA; SPTBN1; TAGLN; THBS1; VCAN;
Substantia nigra	40	1146	5.52486	0.882299	0.819114	1	1	1	ARRDC3; CECR2; DNMBP; DTX4; ERGIC1; GPR27; ITPRIP; PEG10; PROK2; RND1; SBNO2; TM6SF2; SYT17; ZNF652; NCAM2; GRID1; ACBD5; GIMAP2; NINL; NLGN4Y; PCDH18; RBP5; ZGPAT; ATP1B3; BEND3; CALCA; CYR61; FGF14; FSTL3; GFPT2; GFRA3; GPRC5A; IER3; NR4A1; NR4A2; NRG1; PHYHIPL; RASL10A; SEMA4B; SYNE2;
Vagina	247	5307	34.116	1.17625	0.00130451	1	0.00899369	0.0292074	ACVR2B; ALDOA; ALOX5; ANXA1; BAZ1A; BHLHE40; BIRC3; CASP7; CD44; CD55; CDC42EP3; CECR2; CELSR2; CHIC2; CMTM2; CNDP1; CSF2RB; CXCR2; DHODH; ELMSAN1; ERBB2; ERGIC1; FADS2; FAM102B; FASN; FGR; FLT1; FOSL1; FOSL2; GATA4; GATAD2A; GPR160; GPR27; HSPA6; IL18RAP; IL1R2; IL1RN; IRF1; ITGAM; JUND; KCNJ15; KIAA0226L; LMNB1; SOD2; LSP1; MAP3K14; ZC3H12A; SLC16A3; MLXIP; MPND; MX2; MXD1; NFATC2; NFIL3; PDE11…
Monocytes	100	745	13.8122	3.39248	1.32356e-27	1.12238e-24	1.12238e-24	3.64497e-24	ALOX5; ALOX5AP; ANXA1; BASP1; CCL4; CCR1; CD44; CD52; CFP; CLEC7A; CR1; CSF2RB; CSF3R; CXCL1; CXCR2; EVI2B; FCER1G; FCN1; FGR; FLT1; FPR2; G0S2; GCA; GLIPR2; HCAR3; IL1R2; IL1RN; ITGAM; ITGB2; LILRB2; LMNB1; MAP2K3; LSP1; LYN; LYZ; MNDA; MX2; MYADM; MYO1F; NCF2; NCF4; PDE4B; PECAM1; PILRA; PLAUR; PNRC1; RAB5C; RELB; S100A12; S100A4; S100A8; S100A9; SELL; SERPINB9; SLC11A1; STAT3; THEMIS2; TLR2; T…
MDA-MB-468	29	770	4.00552	0.95211	0.636283	1	1	1	ALDOA; ANXA1; CD44; CORO1A; FASN; KRT8; SOD2; S100A9; YBX3; CANX; CLIC4; HSP90B1; LMAN1; EIF4A2; TWF1; CPOX; DBI; HIST1H4B; HIST1H4E; HIST2H2AC; MB; MYL6B; ACOT1; ALDH1A3; ANXA2; NAMPT; SPTBN1; SYNE2; TACSTD2;
Platelets	96	2168	13.2597	1.11916	0.127936	1	0.40633	1	ADSSL1; ALDOA; ANXA1; BIRC3; CCDC71L; CCR1; CD55; CD93; CELSR2; CORO1A; COTL1; CSF3R; DEFA3; DOK3; EFHD2; ENO3; ERBB2; ERGIC1; FAM101B; FASN; FCER1G; FCGR2A; FGR; GCA; HSPA6; ICAM1; SOD2; LPGAT1; LYN; LYZ; SLC16A3; BCL3; MOB3A; NCF2; PECAM1; PKLR; PLEK; PLEKHO2; PPP3R1; PTPN1; RAB5C; RAC2; S100A4; S100A6; S100A8; S100A9; SERPINB9; SLC2A14; SLC2A3; STAT3; STC1; TAGLN2; TGFB1; TIE1; VASP; WASL; ZYX…
HL60	65	545	8.9779	3.01447	1.50093e-15	1.27279e-12	3.18197e-13	1.03336e-12	ADGRG3; ALDOA; ALOX5AP; BASP1; CCR1; CD44; CD55; CFP; CORO1A; CR1; CXCR2; DEFA1B; DEFA1; EMP1; EMP3; ENO3; FASN; FCGR2A; ICAM1; IL17RA; ITGAM; ITGB2; LILRB2; SOD2; LYZ; SLC16A3; MYADM; PECAM1; PILRA; PLAUR; PLXNC1; RAC2; S100A11; S100A4; S100A8; S100A9; SLC6A6; TLR2; TLR8; VNN2; CANX; SLC33A1; SLC39A8; HIST1H1E; HIST1H3C; HIST1H4B; HIST1H4E; ORAI3; SLC29A1; ACTG2; ATP1B3; ATP2B4; CXCR4; F3; FCAR;…
TOV21G	55	904	7.59669	1.53781	0.00101799	0.863255	0.00735485	0.0238852	ALDOA; ANXA1; BASP1; CD44; COTL1; CXCL1; CXCL3; EFHD2; ICAM1; KRT8; LMNB1; SOD2; MMP19; RAB11FIP1; S100A11; S100A4; SDC4; SIN3A; SORT1; TAGLN2; TGFB1; YBX3; ZYX; CANX; CBX5; CLIC4; COL1A2; CPD; HSP90B1; LPP; PTPRS; P4HA1; IGFBP2; GDF15; DBI; HIST1H2BF; HIST1H4B; HIST1H4E; HIST2H2AB; HIST2H2AC; MYL6B; ANXA2; CYR61; IL6; LAMC2; LDLR; PVR; SERPINA1; SPTBN1; SRGN; TACSTD2; TGM2; THBS1; TNFRSF12A; VCA…
Oral mucosa	267	5861	36.8785	1.15131	0.00269438	1	0.017051	0.0553739	AAED1; ACVR2B; ALDOA; ALOX5; ANXA1; BAZ1A; BCL2A1; BCL6; BHLHE40; BIRC3; C5AR1; CASP7; CCL4; CD44; CD55; CDC42EP3; CECR2; CELSR2; CMTM2; CNDP1; CSF2RB; CXCR2; DHODH; ELMSAN1; ERBB2; ERGIC1; FADS2; FAM102B; FAM129A; FASN; FGR; FLT1; FOSL1; FOSL2; G0S2; GATA4; GATAD2A; GPR160; GPR27; HSPA6; IL18RAP; IL1R2; IL1RN; IRF1; JUND; KCNJ15; LMNB1; SOD2; MAP2K3; LPGAT1; MAMDC4; MAP1LC3A; MAP3K14; SLC16A3; B…
Esophagus	280	6034	38.674	1.17274	0.000578076	0.490209	0.00448037	0.0145502	AAED1; ACVR2B; ALDOA; ALOX5; ANXA1; BAZ1A; BBOX1; BCL2A1; BHLHE40; BIRC3; CASP7; CCL4; CD44; CD55; CD93; CDC42EP3; CECR2; CELSR2; CHIC2; CMTM2; CSF2RB; CXCR2; DHODH; ELMSAN1; ERBB2; ERGIC1; F2RL1; FADS2; FAM102B; FAM129A; FASN; FGR; FLT1; FOSL1; FOSL2; GATA4; GATAD2A; GPR160; GPR27; HLA-DPA1; HSPA6; IL17RA; IL18RAP; IL1R2; IL1RN; IRF1; JUND; KCNJ15; KIAA0226L; LMNB1; SOD2; MAP2K3; LPGAT1; LSP1; M…
Corpus callosum	33	988	4.55801	0.844345	0.867133	1	1	1	ARRDC3; CECR2; DNMBP; DTX4; ERGIC1; GPR27; ITPRIP; PEG10; RND1; SBNO2; TM6SF2; ZBTB21; CNTN3; ZNF652; NCAM2; GRID1; ACBD5; GIMAP2; NINL; NLGN4Y; OSGIN1; PCDH18; ZGPAT; BEND3; CYR61; FGF14; FSTL3; GFPT2; IL2RA; PHYHIPL; RASL10A; SEMA4B; SYNE2;
NB4	60	711	8.28729	2.13296	2.63845e-08	2.2374e-05	1.1187e-06	3.63304e-06	ADGRG3; ALDOA; BASP1; C5AR1; CCR1; CD44; CD55; CD83; CD93; CORO1A; CR1; EMP3; ENO3; FASN; ICAM1; IL17RA; ITGAM; ITGB2; MGAM; MMP9; MYADM; MYO1F; PECAM1; PILRA; PLAUR; PLEK; PLXNC1; RAC2; S100A11; SELL; SLC6A6; TIE1; TLR2; TREM1; CANX; CPD; HSP90B1; SLC33A1; TMEM50B; P4HA1; HIST1H3C; HIST1H4B; HIST1H4E; HIST2H2AB; SLC29A1; ATP1B3; F3; FCAR; FCGR1A; LDLR; MCAM; PLSCR1; PVR; SEMA4B; SIRPA; SLC7A1; T…
Mammary gland	41	760	5.66298	1.36366	0.027743	1	0.132915	0.431649	CD44; DGAT2; ERBB2; FADS2; FASN; KRT8; LSP1; MMP19; PDE11A; PLEK; PROK2; S100A11; S100A9; THEMIS2; CYP3A5; NAT2; BRCA1; GIMAP2; OGG1; OSGIN1; RBP5; TBX3; TDGF1; ALDH1A3; ATP1B3; CDKN1A; CHSY3; GFRA3; IER3; IL24; LAMC2; LCN2; LIF; MCAM; NCOA7; NRG1; OLR1; PFKFB3; SAA1; SERPINA1; SYNE2;
19_proteinag	4	98	0.552486	1.03397	0.54633	1	1	1	LYZ; SAA1; SERPINA1; THBS1;
Sertoli cells	3	29	0.414365	2.62213	0.105519	1	0.372951	1	FLT1; SERPINB9; DBI;
031003_BALF2	49	1102	6.76796	1.12392	0.215117	1	0.580663	1	ALDOA; ANXA1; BASP1; CD44; CETP; CORO1A; COTL1; FASN; IL17RA; KRT8; LMNB1; SOD2; MNDA; NCF2; PPP1R18; PTPN1; RAC2; S100A11; S100A6; S100A8; S100P; SELL; TAGLN2; VASP; CANX; CBX5; CLIC4; COL1A2; HSP90B1; LMAN1; AFP; FBXO2; HIST1H1E; IFIT2; MYL6B; ANXA2; CASP4; MAP1B; MCAM; NAMPT; PTX3; RASD1; SAA1; SERPINA1; SPTBN1; TAGLN; TGM2; THBS1; XRN2;
Tears	33	510	4.55801	1.6357	0.00399969	1	0.024401	0.0792433	ALDOA; ANXA1; CORO1A; FASN; IL1RN; ITGAM; SOD2; LYZ; MMP9; MNDA; S100A11; S100A4; S100A6; S100A8; S100A9; S100P; TAGLN2; HSP90B1; LMAN1; PTPRS; TWF1; DBI; LRRC19; MYL6B; TP53I3; ALDH1A3; ANXA2; F3; LCN2; SERPINA1; SERPINB2; TGM2; THBS1;
Cellzome_Abl_inhibitors_NatureBiotechnology_exp144	8	186	1.10497	1.08826	0.456061	1	0.99419	1	HMGA1; SLC16A3; HLA-DQA1; CSTA; HIST1H4B; HIST1H4E; LIMK2; SYNE2;
CaOV3	127	3355	17.5414	0.956709	0.728073	1	1	1	AKAP12; ALDOA; ANXA1; BASP1; CASP7; CD44; CLPTM1; COTL1; CST7; CXCL1; EFHD2; ENO3; ERGIC1; FADS2; FAM129A; FASN; GLIPR2; HMGA1; HMOX1; ICAM1; ITGB2; KIAA0226L; KRT8; LMNB1; SOD2; METRNL; MID1IP1; SLC16A3; MYADM; PEG10; PLAUR; PLBD1; PPP1R18; PRKCI; PTPN1; QPCT; RAB5C; S100A11; S100A4; S100A6; S100A9; SDC4; SGCE; SLC2A14; SLC2A3; STC1; TAGLN2; TGFB1; TPPP; VASP; WASL; YBX3; ZYX; CANX; CBX5; CLIC4;…
Cerebrospinal fluid	61	1059	8.42541	1.45592	0.00205103	1	0.0134034	0.0435282	ALDOA; ANXA1; CCL4; CD44; CELSR2; CNDP1; COTL1; ENO3; HMGA1; HSPA6; KRT8; SOD2; LYZ; QPCT; RAB26; S100A8; S100A9; SERPINB9; SGCE; SORT1; TAGLN2; CNTN3; COL1A2; EFEMP1; HSP90B1; LMAN1; PTPRS; NCAM2; IGFBP2; GDF15; CDH15; CPB2; CSTA; HIST1H3C; HIST1H4B; HIST1H4E; HIST2H2AB; LAMA4; MB; PRSS3; SPHK2; TRHDE; ACTG2; ADAMTS1; ADAMTS4; CHI3L1; DPYSL3; HBEGF; LCN2; MCAM; NPTX2; SAA1; SEMA4B; SERPINA1; SER…
Melanoma	77	1826	10.6354	1.06581	0.291757	1	0.734153	1	ADSSL1; AKAP12; ALDOA; ANXA1; BASP1; CD44; CECR2; CORO1A; COTL1; DGAT2; EFHD2; FAM102B; FAM129A; FASN; FGR; GLIPR2; HMGA1; HSPA6; ITGAM; LMNB1; SOD2; CREB5; LSP1; LYZ; MYADM; MYO1F; NCF2; PDE4B; PLEKHO2; RAB5C; S100A11; S100A8; S100A9; SERPINB9; SORT1; STAT3; TAGAP; TAGLN2; TPPP; TPSAB1; VASP; YBX3; CANX; CLIC4; COL1A2; HSP90B1; LMAN1; LPP; EIF4A2; NT5E; RAP1GDS1; SEC22B; SEC61A1; TMED2; TWF1; CS…
hupo1_b1-hep_cam	2	80	0.276243	0.634874	0.830666	1	1	1	S100A9; SERPINA1;
Subthalamic nucleus	33	882	4.55801	0.945818	0.657079	1	1	1	ARRDC3; CECR2; DNMBP; DTX4; ERGIC1; GPR27; ITPRIP; PEG10; RND1; SBNO2; TM6SF2; CNTN3; SYT17; ZNF652; NCAM2; GRID1; ACBD5; NINL; NLGN4Y; PCDH18; ZGPAT; ATP1B3; BEND3; CYR61; GFPT2; GFRA3; IER3; IL2RA; LCN2; PHYHIPL; RASL10A; SEMA4B; SYNE2;
Melanocytes	3	71	0.414365	1.07123	0.537041	1	1	1	SIGIRR; IL24; RAB27A;
Dentin	15	246	2.07182	1.54193	0.0650335	1	0.270335	0.877927	LYZ; PKLR; TGFB1; CANX; COL1A2; HSP90B1; HIST1H3C; HIST1H4B; HIST1H4E; ANXA2; ATP1B3; PTX3; SERPINA1; THBS1; VCAN;
J82	14	216	1.9337	1.63908	0.0486495	1	0.205248	0.666551	ALDOA; ANXA1; BASP1; CD44; COTL1; S100A11; TAGLN2; ZYX; DBI; MYL6B; ANXA2; DPYSL3; SERPINE1; TAGLN;
15_clinprot_c3	21	749	2.90055	0.708882	0.965269	1	1	1	ALDOA; CORO1A; ENO3; LMNB1; LSP1; PLEK; PTPN1; RAC2; SIN3A; CBX5; HSP90B1; CPOX; MYL6B; GNL3; MTHFD2; PNLIP; SAA1; SERPINA1; SPTBN1; TUBB6; XRN2;
Ubiquitous	39	1052	5.38674	0.937112	0.688916	1	1	1	CLPTM1; DNMBP; FAM107A; GATAD2A; IL17RA; JUND; SOD2; LYZ; NFIL3; RASSF5; S100A6; SGMS2; SLA; SP1; TLR1; TPPP; VASP; SLC33A1; TOB1; MYC; FRAT1; OSCP1; PKD2; PRKCZ; SEC14L3; AGPAT9; CHSY3; ERN1; ETV7; JUN; KLF11; NFKB2; PFKFB3; PHLDA1; PPAN; RAB27A; RPGR; TGM2; TNIK;
Cortex	28	683	3.8674	1.03639	0.451036	1	0.990878	1	AKAP12; ALDOA; BASP1; COTL1; EFHD2; SOD2; RAB5C; SLC2A14; TPPP; CANX; COL1A2; HSP90B1; RAP1GDS1; DBI; GNAO1; HIST1H4B; HIST1H4E; LGI1; ANXA2; ATP2B4; DPYSL3; GPM6B; MAP1B; SERPINA1; SIRPA; SPTBN1; SYN1; VCAN;
N06cs122	16	123	2.20994	3.28917	2.79996e-05	0.0237436	0.000334418	0.00108604	ADSSL1; ANXA1; CD93; DEFA1B; DEFA1; FCER1G; HCK; KRT8; LYN; PECAM1; S100A11; STAT3; WASL; ANXA2; GPRC5A; TGM2;
Basal plate extravillous trophoblast cell	1	3	0.138122	8.47989	0.114079	1	0.372951	1	VASP;
17_wcx	46	1438	6.35359	0.808585	0.949407	1	1	1	ALDOA; CORO1A; DEFA1B; DEFA1; FASN; HCK; KRT8; LMNB1; MAP2K3; LSP1; PLEK; PTPN1; RAC2; S100A11; SIN3A; SP1; TAGLN2; TLE3; VASP; CANX; CBX5; CLIC4; HSP90B1; LMAN1; LPP; PREPL; SEC63; IGFBP2; CPB2; HIST1H3C; HIST2H2AB; MYL6B; TBX3; ANXA2; ARG2; ATP1B3; ATP2B4; GNL3; MAP1B; MTHFD2; NAMPT; PPAN; RRS1; SAA1; SERPINA1; SPTBN1;
hupo1_b2-edta_cam	16	316	2.20994	1.28034	0.18836	1	0.52886	1	ALDOA; CD44; CETP; CFP; ICAM1; QPCT; RAC2; SELL; CANX; RAP1GDS1; CPB2; MYL6B; LCN2; MAPK4; SAA1; SERPINA1;
H23	49	896	6.76796	1.38232	0.0137546	1	0.0711214	0.23097	AKAP12; ALDOA; ANXA1; BASP1; CD44; COTL1; CXCL1; FASN; ICAM1; KRT8; LMNB1; PLAUR; QPCT; S100A11; SDC4; STC1; TAGLN2; TGFB1; YBX3; ZYX; CANX; EFEMP1; HSP90B1; LMAN1; PTPRS; TWF1; IGFBP2; GDF15; DBI; HIST1H2BF; HIST1H3C; HIST1H4B; HIST1H4E; HIST2H2AC; ANXA2; CCL2; CYR61; FSTL3; LDLR; MCAM; NAMPT; NPTX2; PTX3; PVR; SEMA4B; SPTBN1; TGM2; THBS1; TUBB6;
YTS	61	1888	8.42541	0.816643	0.964635	1	1	1	ALDOA; ALOX5AP; CLPTM1; CORO1A; CST7; ERGIC1; FADS2; FAM129A; FASN; ICAM1; ITGB2; ITPRIP; LMNB1; MAP2K3; LPGAT1; LSP1; LYN; PLEK; PLXNC1; PTPN1; RAB5C; RAC2; SERPINB9; SIGIRR; SLC2A3; TAGLN2; VASP; ZYX; CANX; CPD; GLT8D1; HLA-DQA1; HSP90B1; LMAN1; SEC61A1; SEC63; SLC33A1; TMED2; TRAM1; P4HA1; ACBD5; FADS1; HIST1H3C; HIST1H4B; HIST1H4E; RPS4Y1; SLC29A1; ANXA2; ATP1B3; ATP2B4; CIT; ETNK1; GNL3; LDL…
hupo1_b2-hep_cam	38	848	5.24862	1.13275	0.234482	1	0.621376	1	CLPTM1; CORO1A; ERGIC1; FADS2; FASN; GLIPR2; ITGB2; LMNB1; MYADM; PTPN1; RAB5C; S100A9; SLA; SORT1; CANX; LMAN1; PTPRS; SEC22B; SEC61A1; SEC63; TMED2; TRAM1; CLGN; CPOX; HIST1H4B; HIST1H4E; MYL6B; RMND1; SLC29A1; ATP1B3; ATP2B4; CXCR4; PVR; RAB27A; SERPINA1; SLC7A1; SPTBN1; SYNE2;
Ileum	8	201	1.10497	1.00705	0.543953	1	1	1	DGAT2; SIGIRR; MEP1B; GIMAP2; MOGAT2; OSGIN1; MUC17; SYNE2;
Embryonic stem cells	104	3047	14.3646	0.862654	0.960809	1	1	1	AKAP12; ALDOA; ANXA1; BASP1; CD44; CLPTM1; DHODH; ERBB2; ERGIC1; FADS2; FAM129A; FASN; GLIPR2; HMGA1; HMOX1; ICAM1; ITPRIP; KRT8; LMNB1; LPGAT1; LYN; LYZ; SLC16A3; MYADM; MYO1F; PKLR; PTPN1; RAB20; RAB5C; SDC4; SERPINB9; SIGIRR; SLC2A3; SLC6A6; SORT1; STAT3; TLE3; UGCG; YBX3; CANX; CLIC4; COL1A2; CPD; GLT8D1; HSP90B1; LMAN1; LPP; MANEA; NT5E; PTPRS; SEC22B; SEC61A1; SEC63; SLC33A1; TMED2; TRAM1; …
Saliva	55	912	7.59669	1.52433	0.00124254	1	0.00863669	0.0280481	ALDOA; ANXA1; BASP1; CD44; CD55; CORO1A; DEFA1B; DEFA3; DEFA1; ENO3; FAM129A; GCA; HSPA6; IL1RN; ITGAM; ITGB2; KRT8; LMNB1; LYZ; METRNL; MMP9; RAB5C; S100A11; S100A12; S100A6; S100A8; S100A9; S100P; SDC4; TAGLN2; CANX; CPD; HSP90B1; LMAN1; MCFD2; ASPM; CRYAA; CSTA; DBI; HIST1H4B; HIST1H4E; HOPX; LAMA4; MYL6B; TBX3; ACTG2; ANXA2; GPRC5A; LCN2; SAA1; SERPINA1; SPTBN1; TACSTD2; THBS1; TMPRSS2;
Nuclear	28	1319	3.8674	0.536662	0.999956	1	1	1	ALDOA; FAM129A; FASN; PPP3R1; PTPN1; RAC2; TAGLN2; TLE3; TRAF4; CBX5; CLIC4; HSP90B1; LPP; PCMTD1; SEC61A1; TIA1; P4HA1; GDF15; CPOX; ADAMTS1; ARG2; GNL3; MAP1B; MTHFD2; NAMPT; RRP12; URB2; XRN2;
N06CS98-2	23	165	3.1768	3.52405	1.50448e-07	0.00012758	3.75234e-06	1.21859e-05	ALDOA; ANXA1; DEFA1B; DEFA1; FCER1G; FGR; FLT1; HCK; KRT8; LST1; LYN; MX2; PECAM1; SDC4; STAT3; TAGLN2; LPP; C11orf52; DBI; ANXA2; GPRC5A; LAMC2; TGM2;
MV4-11	15	382	2.07182	0.992982	0.549604	1	1	1	CORO1A; FGR; HCK; MAP2K3; LYN; MYO1F; RASSF2; RPS6KA5; CANX; SEC61A1; CPOX; HIST1H4B; HIST1H4E; ERN1; IRAK3;
Caudate nucleus	40	1204	5.52486	0.839796	0.89584	1	1	1	ARRDC3; CECR2; DGAT2; DNMBP; DTX4; ERGIC1; GPR27; ITPRIP; PEG10; PROK2; RAB26; RND1; SBNO2; TM6SF2; ZBTB21; CNTN3; SYT17; ZNF652; NCAM2; GRID1; ACBD5; GCK; NINL; NLGN4Y; PCDH18; RBP5; ZGPAT; ATP1B3; BEND3; CYR61; FGF14; GFPT2; GFRA3; IER3; IL2RA; NR4A1; PHYHIPL; RASL10A; SEMA4B; SYNE2;
Retina	16	364	2.20994	1.11151	0.369115	1	0.841423	1	ICAM1; IL1RN; MXD1; PECAM1; TLR1; TNFRSF10C; IGFBP2; ABCC6; FADS1; CCL2; CXCL6; FGF14; MMP10; RGS1; RGS16; RPGR;
Medulla oblongata	17	473	2.34807	0.908803	0.692881	1	1	1	ALOX5AP; DGAT2; GPR27; LRRK2; PROK2; RND1; GIMAP2; OSGIN1; RBP5; ATP1B3; CYR61; FGF14; GFPT2; GFRA3; IER3; NR4A1; SYNE2;
Bladder cancer cells	30	369	4.14365	2.05524	0.000163786	0.13889	0.00156056	0.005068	ALDOA; ANXA1; CD44; CDC42BPA; FASN; HSPA6; ICAM1; KRT8; RAB5C; S100A8; S100A9; TAGLN2; VASP; CANX; HSP90B1; EIF4A2; NT5E; HIST1H2BF; HIST1H4B; HIST1H4E; ANXA2; ATP1B3; ATP2B4; EPHA2; GPRC5A; LAMC2; MYH11; NAMPT; TACSTD2; THBS1;
PC3(AR)6	26	262	3.59116	2.50875	1.65863e-05	0.0140652	0.000219769	0.00071371	ALDOA; ANXA1; BASP1; CD44; CXCL3; ICAM1; KRT8; SOD2; S100A11; S100A6; S100A8; S100A9; SDC4; TAGLN2; IGFBP2; GDF15; AMOT; ANXA2; CYR61; IL6; LAMC2; LCN2; PTX3; SERPINA1; TACSTD2; THBS1;
Neutrophils	67	393	9.25414	4.30895	1.65065e-24	1.39975e-21	6.99877e-22	2.27288e-21	ALDOA; ALOX5; ALOX5AP; ANXA1; C5AR1; CFP; CORO1A; CR1; CSF2RB; CSF3R; CXCL3; CXCR2; DEFA3; DEFA1; EFHD2; F2RL1; FCGR2A; FCGR3B; FCN1; FPR1; FPR2; GCA; ICAM1; IL1R2; IL1RN; ITGAM; ITGB2; SOD2; LSP1; LYN; LYZ; MGAM; MMP25; MMP9; NCF2; NCF4; PADI4; QPCT; RAB5C; RAC2; S100A12; S100A4; S100A8; S100A9; S100P; SELL; SLC11A1; SLC2A3; STAT3; TAGLN2; TREM1; VASP; VNN2; AMOT; CSTA; CHI3L1; CXCR4; FCAR; FCGR…
Parathyroid	49	782	6.76796	1.58383	0.00102343	0.867873	0.00735485	0.0238852	ALOX5; BAZ1A; C5AR1; CD55; CD83; CECR2; ELMSAN1; ENO3; HCK; HMOX1; KRT8; SOD2; MAP3K14; MXD1; PPP3R1; RPS6KA5; SELL; SIGIRR; SP1; STAT3; VASP; CANX; MEIS2; MYC; FOS; AMOT; PKD2; PRKCZ; RPS4Y1; TPPP2; ANXA2; ARG2; ATF3; CYP27B1; FRMD6; GAD2; GPM6B; HOMER1; IER3; IL4R; JUN; LAMC2; MAP3K8; MCAM; MMP10; NFE2; NRG1; PTGS2; SYN1;
HEK293	120	4439	16.5746	0.68323	1	1	1	1	AKAP12; ALDOA; ANXA1; BASP1; BAZ1A; CASP7; CD44; CDC42BPA; CELSR2; CLPTM1; COTL1; DHODH; DNMBP; EFHD2; ELMSAN1; ERBB2; ERGIC1; FADS2; FAM129A; FASN; GATA4; GATAD2A; GLIPR2; HMOX1; KRT8; LMNB1; SOD2; MAP2K3; CREB5; LYN; MOB3A; MPND; PEG10; PPP1R18; PPP3R1; PRKCI; PTPN1; RAB11FIP1; RAB5C; RAC2; S100A11; SERPINB9; SIN3A; SORT1; SP1; TAGLN2; TLE3; UGCG; VASP; WASL; YBX3; ZBTB21; ZYX; CANX; CBX5; CLIC…
A549	31	997	4.28177	0.786028	0.936753	1	1	1	ALDOA; DOK3; FASN; HMGA1; KRT8; LMNB1; PRKCI; SERTAD1; SLC11A1; TAGLN2; TPPP; VASP; YBX3; CBX5; LMAN1; WNK3; DBI; HIST1H1E; HIST1H3C; HIST1H4B; HIST1H4E; RPS4Y1; ANXA2; CEBPD; LAMC2; MAP1B; MTHFD2; NPTX2; SPTBN1; TAGLN; TGM2;
Semen	58	966	8.01105	1.5176	0.00102242	0.867012	0.00735485	0.0238852	ALDOA; ANXA1; BASP1; CD44; CD52; DEFA1B; DEFA1; EFHD2; FAM129A; FASN; GLIPR2; KRT8; SOD2; LYZ; MGAM; QPCT; RAB5C; S100A11; S100A8; S100A9; SLC2A3; SORT1; TAGLN2; TGFB1; CNTN3; CPD; EFEMP1; GSTT1; HSP90B1; PTPRS; TSPAN8; NCAM2; IGFBP2; GDF15; IGFBP1; CSTA; DBI; GNAO1; HIST1H3C; HIST1H4B; HIST1H4E; METRN; TP53I3; ADAMTS1; ANXA2; ARG2; CRISPLD2; IL1RL1; IL6; LCN2; LDLR; PAPPA; RAB27A; SEMA4B; SERPIN…
Temporal cortex	3	51	0.414365	1.49124	0.32826	1	0.786997	1	CNDP1; NLGN4Y; CYR61;
Keratinocytes	33	250	4.55801	3.33675	1.27696e-09	1.08286e-06	1.08286e-07	3.51664e-07	ALOX5; CD44; F2RL1; FAM65B; FCGR3B; FOSL1; HLA-DPA1; IL18RAP; IL1RN; JUND; MMP9; PPP3R1; RIPK4; S100A8; S100A9; TSLP; UGCG; ZYX; CANX; P2RY2; CCL20; CISH; CYP27B1; ELF3; FSTL3; HBEGF; IER3; KLF5; LAMC2; MMP10; SERPINB2; SERPINB8; SPTBN1;
Fetus	144	2992	19.8895	1.21637	0.00585853	1	0.0335794	0.109051	ALOX5AP; ARRDC3; BHLHE40; CD44; CECR2; COTL1; CSF3R; CXCR2; DGAT2; DNMBP; DTX4; EMP3; ERBB2; ERGIC1; FASN; FLT1; GATA4; GATAD2A; ITPRIP; KCNJ15; LITAF; CREB5; LSP1; NFATC2; NFIL3; PADI4; PDE11A; PEG10; PIM1; PLEK; PLK2; PROK2; RAB26; RND1; RPS6KA5; S100A11; S100A4; S100P; SBNO2; SDC4; SEC14L1; SIGIRR; SLC2A3; SOCS3; SOX17; SOX7; STAT3; THEMIS2; TM6SF2; TRAF4; AUTS2; CPD; CYP3A5; EFEMP1; MTMR4; PT…
MCF7	18	317	2.48619	1.43574	0.0801462	1	0.300725	0.97662	ALDOA; BASP1; CELSR2; FASN; KRT8; S100A11; SDC4; SORT1; STC1; TAGLN2; PTPRS; IGFBP2; HIST1H2BF; HIST1H4B; HIST1H4E; HIST2H2AC; MYL6B; SPTBN1;
Corneal epithelial cells	3	28	0.414365	2.71574	0.0973252	1	0.351199	1	CXCL1; F2RL1; CXCL6;
051503_BAL20_gly_hui	7	268	0.966851	0.661002	0.909728	1	1	1	RAP1GDS1; GRAP; MYL6B; MAPK4; MTHFD2; SERPINA1; XRN2;
Ovarian follicle	2	18	0.276243	2.82045	0.157899	1	0.466545	1	CSF3; PAPPA;
Adducin	17	486	2.34807	0.884494	0.73356	1	1	1	ALDOA; CD44; CORO1A; FASN; ITGB2; LMNB1; LSP1; NFATC2; S100A11; VASP; CBX5; HSP90B1; CPOX; MYL6B; ANXA2; GNL3; RRS1;
MCF10A	30	661	4.14365	1.14734	0.243401	1	0.636582	1	ALDOA; ANXA1; BASP1; CD44; CXCL1; EFHD2; HMGA1; KIAA0226L; LMNB1; SOD2; S100A11; S100A6; S100A8; TAGLN2; VASP; ZYX; CLIC4; NT5E; DBI; HIST1H1A; HIST1H4B; HIST1H4E; MYL6B; TP53I3; ANXA2; ATP2B4; IL1RL1; LAMC2; SERPINE1; THBS1;
22_mars	11	196	1.51934	1.41953	0.155225	1	0.461599	1	CETP; CFP; CNDP1; DEFA1B; DEFA1; SELL; EFEMP1; CPB2; ARG2; PVR; SAA1;
041803_BALF3	60	1103	8.28729	1.37493	0.00761278	1	0.0423779	0.137624	ALDOA; ANXA1; BASP1; CD44; CORO1A; CR1; DOK3; FASN; FCN1; FLT1; GCA; GLIPR2; HLA-DPA1; ITGAM; LMNB1; LSP1; LYZ; MMP9; MNDA; MOB3A; NCF2; PADI4; PLEK; PLEKHO2; PPP1R18; PTPN1; RAB11FIP1; RAC2; RELB; S100A12; S100A4; S100A8; S100A9; SERPINB9; TAGLN2; THEMIS2; VASP; YBX3; ZYX; CANX; HSP90B1; LMAN1; RAP1GDS1; P4HA1; CPOX; DBI; HIST1H4B; HIST1H4E; MYL6B; ANXA2; ATP1B3; CRISPLD2; IL1B; NAMPT; RAB27A; S…
Macrophages	49	274	6.76796	4.52016	4.30878e-19	3.65385e-16	1.21795e-16	3.95535e-16	BCL6; CCL4; CD52; CLEC7A; CR1; CXCL3; CXCR2; FCGR2A; FCN1; FGR; GCA; HMOX1; IL1RN; ITGAM; LILRB2; LSP1; LYN; MMP9; MPEG1; NCF2; PLAUR; PLK2; RELB; S100A8; SLC11A1; STAT3; TREM1; CYP3A5; GDF15; CCL20; CCL3; CHI3L1; CXCL6; CXCR4; CYP27B1; ETS2; FCAR; HBEGF; HDC; IER3; IL1B; IL24; IL4R; LDLR; LIF; OLR1; SERPINA1; SERPINB2; SRGN;
Muscle	58	904	8.01105	1.62168	0.000197944	0.167856	0.00178571	0.00579916	ADSSL1; ALDOA; AVPR1A; BCL6; BIRC3; CASP7; CD44; CDC42BPA; CETP; EMP1; ENO3; FRAT2; LMNB1; MAP2K3; SLC16A3; NFATC2; NFIL3; PLIN1; PRKCI; SGMS2; SLC16A6; SOCS3; TLR2; TNFRSF10C; WNT11; CLIC4; EFEMP1; MUM1; PTPRS; P4HA1; BRCA1; CHRNB1; LAMA4; LGI1; OSGIN1; TBX3; TCAP; ADAMTS4; CASP4; CDH19; CEBPD; FOXC1; FOXO1; FZD7; GNL3; IRAK3; IRS2; KLF6; LAMC2; MAP3K8; OLR1; PFKFB3; PRRX1; RAB27A; SOCS2; SYNE2;…
Synovial membrane	2	8	0.276243	6.3416	0.0373608	1	0.169422	0.550206	DEFA3; IL17RA;
MicroProt2	40	561	5.52486	1.80233	0.000248425	0.210665	0.0021718	0.00705303	CFP; COTL1; DEFA1B; DEFA1; FASN; G0S2; GLIPR2; SOD2; LYZ; PLAUR; PRAP1; S100A11; S100A12; S100A4; S100A6; S100A8; S100A9; S100P; SELL; TAGLN2; YBX3; ZYX; EFEMP1; PTPRS; IGFBP2; IGFBP1; CCL14; CSTA; DBI; MB; ANXA2; CALCA; CNN1; FSTL3; LCN2; SAA1; SERPINA1; SRGN; THBS1; TNFRSF12A;
Hypothalamus	6	147	0.828729	1.03315	0.527703	1	1	1	GCK; GFPT2; GFRA3; GPRC5A; HDC; NR4A1;
Ventricles	6	151	0.828729	1.00578	0.554111	1	1	1	GIMAP2; OSGIN1; ANXA2; KCNK1; RGS2; SYNE2;
Endometrium	90	1202	12.4309	1.89242	3.05748e-09	2.59275e-06	2.16062e-07	7.01672e-07	ALOX5; ANXA1; BAZ1A; BCL6; CD44; CD55; CECR2; COTL1; CXCL1; CXCR2; ELMSAN1; ERBB2; FASN; FLT1; FOSL2; HCK; HMOX1; ICAM1; IL1R2; IL1RN; ITGAM; JUND; KRT8; SOD2; LYN; BCL3; MXD1; NCF1; NCF2; PECAM1; PPP3R1; RPS6KA5; S100A4; S100A6; SELL; SLC2A3; SP1; STAT3; TGFB1; VASP; WASL; CANX; CNTN3; MEIS2; MYC; IGFBP1; FOS; AMOT; NINL; PKD2; PRKCZ; RPS4Y1; TDGF1; TPPP2; ACTG2; ANXA2; ARG2; ATF3; CSF3; CXCL6; …
Thalamus	35	1141	4.83425	0.775422	0.956675	1	1	1	ARRDC3; CECR2; DNMBP; ERGIC1; GPR27; ITPRIP; PEG10; PROK2; RND1; SBNO2; TM6SF2; CNTN3; ZNF652; NCAM2; GRID1; ACBD5; GIMAP2; NINL; NLGN4Y; OSGIN1; PCDH18; RBP5; ZGPAT; ATP1B3; CALCA; CYR61; FGF14; GFPT2; GFRA3; IER3; NR4A1; PHYHIPL; RASL10A; SEMA4B; SYNE2;
Putamen	19	527	2.62431	0.911588	0.694825	1	1	1	ALOX5AP; DGAT2; GPR27; LRRK2; PROK2; RND1; SYT17; GIMAP2; OSGIN1; RBP5; ATP1B3; CALCA; CYR61; FGF14; GFPT2; GFRA3; LCN2; SLITRK3; SYNE2;
PT45	27	361	3.72928	1.89078	0.00121602	1	0.00852222	0.0276763	ALDOA; ANXA1; COTL1; LMNB1; PLAUR; QPCT; S100A11; SDC4; SGCE; SORT1; TAGLN2; TGFB1; CANX; EFEMP1; HSP90B1; GDF15; IGFBP1; ANXA2; CYR61; LDLR; MCAM; PTX3; PVR; SEMA4B; SERPINE1; SRGN; THBS1;
Colorectal cancer cells	42	561	5.8011	1.89242	5.98182e-05	0.0507258	0.000667445	0.00216756	ALDOA; ANXA1; CD44; CD55; ENO3; FASN; HSPA6; KRT8; LYZ; METRNL; MYADM; QPCT; RAB5C; S100A11; S100A6; S100P; SDC4; SORT1; TAGLN2; CANX; CLIC4; HSP90B1; EIF4A2; TMED2; TSPAN8; HIST1H4B; HIST1H4E; HIST2H2AC; LGALS4; MYL6B; RPS4Y1; SLC29A1; ACTG2; ANXA2; EPHA2; GPRC5A; MYH11; SERPINA1; SPTBN1; THBS1; TNIK; TUBB6;
Jejunum	9	194	1.24309	1.17364	0.36118	1	0.830017	1	DGAT2; SIGIRR; SLC2A3; CYP3A5; GIMAP2; MOGAT2; OSGIN1; MUC17; SYNE2;
ARPE-19	18	330	2.48619	1.37918	0.106282	1	0.372951	1	ALDOA; ANXA1; CD44; KRT8; RAB5C; CANX; HSP90B1; SEC22B; SEC61A1; TRAM1; P4HA1; HIST1H4B; HIST1H4E; MYL6B; ANXA2; MYH11; SPTBN1; TUBB6;
BOB2H_ISB	2	98	0.276243	0.518276	0.904247	1	1	1	CPB2; SERPINA1;
Temporal lobe	16	477	2.20994	0.848202	0.78557	1	1	1	ALOX5AP; GPR27; LRRK2; PROK2; RND1; SYT17; OSGIN1; RBP5; ATP1B3; CYR61; FGF14; GFRA3; IER3; NR4A1; SLITRK3; SYNE2;
hupo53_reference_cam	3	104	0.414365	0.731353	0.784997	1	1	1	CFP; MB; SERPINA1;
RMUG	31	499	4.28177	1.57046	0.00910998	1	0.0488941	0.158786	ALDOA; ANXA1; CD44; CD55; CELSR2; FASN; KRT8; LMNB1; PLAUR; PLBD1; S100A11; SDC4; TAGLN2; CANX; HSP90B1; TWF1; IGFBP2; GDF15; DBI; HIST1H2BF; HIST1H4B; HIST1H4E; ANXA2; ATP1B3; LAMC2; LCN2; SERPINE1; SPTBN1; SRGN; TACSTD2; THBS1;
DU145	58	941	8.01105	1.55792	0.000544799	0.461989	0.00427768	0.013892	ALDOA; ANXA1; CD44; CD55; COTL1; CXCL1; ENO3; FASN; GLIPR2; ICAM1; SOD2; LYN; SLC16A3; MYADM; PTPN1; RAB5C; S100A8; SDC4; TAGLN2; ZYX; CANX; CLIC4; CPD; EFEMP1; HSP90B1; NT5E; SEC22B; SEC63; AFP; CLGN; GNAO1; HIST1H4B; HIST1H4E; MREG; SLC29A1; ANXA2; ATP2B4; CYR61; EPHA2; F3; GPRC5A; IL6; LCN2; LDLR; MCAM; NAMPT; OSMR; PLSCR1; PVR; SEMA4B; SERPINA1; SLC7A1; TACSTD2; TGM2; THBD; THBS1; TNFRSF10D; …
Lacrimal glands	31	453	4.28177	1.72993	0.00226802	1	0.0146696	0.0476403	ALDOA; CORO1A; FASN; IL1RN; ITGAM; SOD2; MMP9; MNDA; S100A11; S100A4; S100A6; S100A8; S100A9; S100P; TAGLN2; HSP90B1; LMAN1; PTPRS; TWF1; DBI; LRRC19; MYL6B; TP53I3; ALDH1A3; ANXA2; F3; LCN2; SERPINA1; SERPINB2; TGM2; THBS1;
hupo1_b1-edta_cam	1	42	0.138122	0.607581	0.816883	1	1	1	SERPINA1;
Cervix	6	104	0.828729	1.46028	0.229777	1	0.614551	1	CD44; DGAT2; KRT8; BRCA1; OSGIN1; CCL20;
Megakaryocytes	4	47	0.552486	2.15571	0.114348	1	0.372951	1	NCF4; STC1; SRGN; THBS1;
Epidermis	13	95	1.79558	3.46054	9.17472e-05	0.0778017	0.000937369	0.00304415	CD44; PPP3R1; S100A11; S100A8; S100A9; CSTA; DBI; CCL20; F3; IER3; KLF5; SERPINB8; VCAN;
Cervico-vaginal fluid	51	565	7.0442	2.28158	3.6691e-08	3.1114e-05	1.41427e-06	4.59291e-06	ADGRG3; ALDOA; ANXA1; BAZ1A; CD55; CFP; DEFA1B; DEFA1; EFHD2; ENO3; FASN; FCGR3B; IL1RN; ITGB2; LMNB1; SOD2; LSP1; LYN; LYZ; MGAM; MMP9; PLBD1; RAC2; S100A11; S100A12; S100A8; S100A9; S100P; SERPINB9; SORT1; TAGLN2; CANX; HSP90B1; CSTA; DBI; HIST1H4B; HIST1H4E; HOPX; LAMA4; TP53I3; TRHDE; ANXA2; FILIP1L; LCN2; MAP1B; NAMPT; SERPINA1; SPTBN1; TACSTD2; TMPRSS2; VCAN;
Embryo	7	104	0.966851	1.70325	0.118198	1	0.381286	1	BHLHE40; HMGA1; SOX7; STAT3; DNMT3L; LAMC2; PRRX1;
Uterine cervix	58	902	8.01105	1.62528	0.000186863	0.15846	0.00173405	0.0056314	ALOX5; BAZ1A; CD44; CD55; CD83; CECR2; ELMSAN1; ERBB2; HCK; IL1RN; JUND; KRT8; SOD2; LYN; LYZ; MAP3K14; MMP9; MXD1; PPP3R1; RPS6KA5; S100A4; S100A6; S100A8; SLC2A3; SP1; STAT3; TLR8; VASP; CANX; MEIS2; FOS; AMOT; CSTA; NINL; PKD2; PRKCZ; RPS4Y1; TPPP2; ANXA2; ATF3; CDKN1A; FRMD6; GAD2; GPM6B; HSPB6; IL4R; JUNB; LAMC2; MAP3K8; MMP10; NFE2; NRG1; PTGS2; RPGR; SIRPA; SYNE2; TGM2; THBD;
Thymus	29	456	4.00552	1.60771	0.00843282	1	0.0461357	0.149828	CD44; CECR2; CORO1A; CST7; DEFA1; FAM107A; FCN1; IL17RA; MLXIP; PROK2; RELB; VNN3; AUTS2; EFEMP1; NT5E; BRCA1; CCL14; CKAP2; FAM13A; GRAP; JAKMIP2; CCL20; CD274; LCN2; MCAM; PPAN; SIRPA; SYNE2; XRN2;
Aspc1	29	483	4.00552	1.51784	0.0173901	1	0.0883042	0.286772	ALDOA; ANXA1; CD55; EFHD2; LYZ; S100A11; S100A4; SDC4; TAGLN2; HSP90B1; IGFBP2; IGFBP1; HIST1H4B; HIST1H4E; LAMA4; LGALS4; ALDH1A3; ANXA2; CYR61; LAMC2; LCN2; LDLR; NAMPT; SEMA4B; SERPINE1; SPTBN1; TGM2; THBS1; VCAN;
Vermiform appendix	14	286	1.9337	1.23792	0.244149	1	0.636582	1	ALOX5AP; CASP7; CLEC7A; FASN; LITAF; PROK2; GIMAP2; RBP5; ADAM19; ATP1B3; CCL20; OLR1; SYNE2; TNFSF14;
Distal convoluted tubule	1	17	0.138122	1.50056	0.496744	1	1	1	BTG2;
Mast cells	11	62	1.51934	4.48705	2.77846e-05	0.0235614	0.000334418	0.00108604	CCR1; CR1; CXCR2; F2RL1; FASN; FCER1G; NCF4; TPSAB1; TPSB2; TIA1; HDC;
Cardiomyocytes	2	31	0.276243	1.63806	0.348662	1	0.819018	1	STC1; F3;
Bone	7	112	0.966851	1.5816	0.155681	1	0.461599	1	MXD1; IGFBP2; CALCA; CDKN1A; MMP10; MSX1; TGFB3;
Trachea	19	612	2.62431	0.784981	0.889275	1	1	1	F2RL1; NFIL3; PDE11A; PROK2; THEMIS2; SYT17; GIMAP2; OSGIN1; PCDH18; RBP5; TBX3; AKAP14; ATP1B3; GFRA3; IER3; KLF11; LCN2; MYH11; SYNE2;
Astrocytes	6	58	0.828729	2.61823	0.0266117	1	0.130463	0.423685	CD44; CR1; CXCL3; CXCR2; FASN; SOD2;
050603_BALF11	48	1019	6.62983	1.19066	0.119118	1	0.382621	1	ALDOA; ANXA1; BASP1; CD44; CLPTM1; CORO1A; ERGIC1; FASN; GCA; HLA-DPA1; HMGA1; ICAM1; ITGB2; LMNB1; LSP1; LYN; NCF2; PLAUR; PPP1R18; PTPN1; RAB5C; RAC2; S100A12; S100A6; S100A9; YBX3; ZYX; CANX; HLA-DQA1; HSP90B1; LMAN1; SEC22B; TMED2; HIST1H4B; HIST1H4E; MYL6B; RMND1; SLC29A1; ANXA2; ATP1B3; CIT; CXCR4; IL1B; MTHFD2; NAMPT; SERPINA1; SPTBN1; TUBB6;
HCC78	21	249	2.90055	2.13228	0.00094542	0.801716	0.00697144	0.0226401	ALDOA; ERBB2; FLT1; KRT8; LYN; PTPRE; S100A11; SGMS2; SOCS3; STAT3; TAGLN2; WASL; LPP; TWF1; C11orf52; ANXA2; EPHA2; GPRC5A; IRS2; LDLR; TGM2;
RBC	14	267	1.9337	1.32601	0.174366	1	0.508119	1	ANXA1; CD44; CD55; GLIPR2; LYZ; RAB5C; SLC2A3; CANX; SEC22B; KCNK5; ATP2B4; PLSCR1; SPTBN1; THBS1;
T-lymphocytes	1	18	0.138122	1.41724	0.516676	1	1	1	ICAM1;
Hepatocytes	9	73	1.24309	3.11873	0.00228348	1	0.0146696	0.0476403	CXCL3; FASN; S100A11; GSTT1; TSPAN8; ALDH1A3; BTG2; MUC17; SERPINA1;
Nervous system	10	212	1.38122	1.1932	0.330496	1	0.786997	1	ALDOA; MXD1; LAMA4; LGI1; CACNG2; CALCA; MSX1; OLR1; PMP22; THBD;
HPDE6	20	414	2.76243	1.22144	0.209074	1	0.577507	1	ALDOA; ANXA1; CD44; COTL1; FASN; LMNB1; SOD2; S100A11; TAGLN2; EFEMP1; HSP90B1; ANXA2; CYR61; LAMC2; LCN2; SAA1; SERPINB2; SERPINE1; SPTBN1; THBS1;
Transverse colon	4	48	0.552486	2.11081	0.121073	1	0.387433	1	GIMAP2; MOGAT2; OSGIN1; MUC17;
Occipital lobe	13	359	1.79558	0.915812	0.667804	1	1	1	LRRK2; PROK2; SYT17; OSGIN1; RBP5; ATP1B3; FGF14; GFPT2; GFRA3; IER3; LCN2; NR4A1; SYNE2;
N06CS97	26	270	3.59116	2.43442	2.7988e-05	0.0237338	0.000334418	0.00108604	ALDOA; DEFA1B; DEFA1; FCER1G; FCGR2A; FGR; FLT1; HCK; KRT8; LYN; PECAM1; S100A11; SDC4; STAT3; TAGLN2; VASP; CPD; HSP90B1; HIST1H4B; HIST1H4E; ANXA2; EPHA2; GPRC5A; OSMR; TAGLN; TGM2;
Blood vessels	15	130	2.07182	2.91769	0.000195498	0.165782	0.0017826	0.00578909	AVPR1A; C5AR1; CD55; CD93; FLT1; HMOX1; ICAM1; TIE1; PTPRS; LAMA4; EPHA2; IL4R; SAA1; THBD; THBS1;
NIBSC_glyco_qstar	2	60	0.276243	0.846463	0.692501	1	1	1	CPB2; SERPINA1;
Cartilage	8	89	1.10497	2.2742	0.0245538	1	0.121764	0.395434	BHLHE40; ICAM1; IL17RA; MXD1; EGR1; LAMC2; SERPINA1; VCAN;
Spermatogonia	1	23	0.138122	1.10928	0.605115	1	1	1	SERPINB9;
Milk	7	47	0.966851	3.76845	0.00233563	1	0.0148918	0.048362	IL1R2; IL1RN; LYZ; IGFBP2; IGFBP1; CSF3; SERPINA1;
Pineal gland	2	31	0.276243	1.63806	0.348662	1	0.819018	1	CCL4; CALCA;
MiaPaCa2	17	289	2.34807	1.4874	0.067893	1	0.272859	0.886123	ALDOA; ANXA1; CD44; LMNB1; SOD2; S100A11; TAGLN2; COL1A2; HSP90B1; PTPRS; ANXA2; CYR61; SERPINA1; SERPINE1; SRGN; TGM2; VCAN;
Intestine	33	508	4.55801	1.64213	0.0037684	1	0.0233256	0.075751	ALDOA; BCL2A1; BHLHE40; CASP7; CETP; CXCR2; ICAM1; KRT8; MAP2K3; MAP3K14; MMP19; PPRC1; PRKCI; PTPRE; SLC6A6; VNN3; EFEMP1; NAT2; P4HA1; CCL14; CEBPA; FMO1; LAMA4; OGG1; AGPAT9; CACNG2; ELF3; FOXO1; IER3; IL4R; LAMC2; OLR1; SAA1;
Synovial fluid	5	17	0.690608	7.44336	0.000398034	0.337533	0.00327245	0.0106274	CXCL1; IL1R2; IGFBP2; IGFBP1; MCAM;
Photoreceptor	1	4	0.138122	6.36521	0.14914	1	0.449761	1	RPGR;
Blood	26	227	3.59116	2.89555	1.19754e-06	0.00101552	2.47687e-05	8.04374e-05	ANXA1; CETP; CXCR2; DEFA1; HLA-DPA1; RELB; STAT3; WASL; ZYX; CYP3A5; NCAM2; IGFBP1; BRCA1; CPB2; LAMA4; OGG1; SEC14L3; CASP4; EGR1; FOXO1; KLF6; MT1A; PPAP2B; RPGR; SAA1; SOCS1;
Stem cell	9	138	1.24309	1.64987	0.0972368	1	0.351199	1	ALDOA; ENO3; SOD2; PKLR; CLIC4; P4HA1; TP53I3; ACTG2; SERPINE1;
Adipocytes	17	147	2.34807	2.92411	7.29473e-05	0.0618593	0.000764385	0.00248238	CXCL1; FASN; IL1RN; MMP9; PLIN1; SLC2A3; SORT1; TGFB1; IGFBP2; IGFBP1; CCL2; CCL3; IL1B; IL1RL1; IL6; LIF; PHLDA1;
Pituitary gland	27	494	3.72928	1.38173	0.0570156	1	0.238174	0.77348	ALDOA; PDE11A; PROK2; QPCT; TPSB2; CPD; SYT17; IGFBP2; DBP; GIMAP2; RBP5; TBX10; TBX3; ARG2; ATP1B3; CALCA; FSTL3; GADD45G; GFRA3; GPRC5A; IER3; LCN2; LIF; OLR1; SAA1; SERPINB8; SYNE2;
BOBFreezeThaw	1	64	0.138122	0.398758	0.924864	1	1	1	SERPINA1;
Caecum	2	36	0.276243	1.41061	0.419655	1	0.926738	1	NFIL3; MOGAT2;
Vulva	54	838	7.45856	1.62877	0.000294904	0.250079	0.00252605	0.00820345	ALOX5; BAZ1A; C5AR1; CD44; CD55; CECR2; ELMSAN1; IL1RN; JUND; SOD2; MAP3K14; BCL3; MMP9; MXD1; PPP3R1; RPS6KA5; S100A6; S100A8; SELL; SP1; STAT3; VASP; WASL; CANX; CNTN3; MEIS2; ZNF652; FOS; CSTA; NINL; PKD2; PRKCZ; RPS4Y1; TPPP2; ANXA2; ATF3; CDKN1A; FRMD6; GAD2; GPM6B; HSPB6; IL4R; JUN; JUNB; LAMC2; MAP3K8; MCAM; MMP10; NFE2; RPGR; SIRPA; SYN1; SYNE2; THBD;
032403_BALF4_glypep	2	43	0.276243	1.18103	0.511857	1	1	1	LCN2; SERPINA1;
B cells	33	533	4.55801	1.56511	0.00764601	1	0.0423779	0.137624	ALDOA; CD44; CD55; CORO1A; COTL1; EVI2B; FASN; FGR; GCA; ICAM1; ITGB2; LSP1; PECAM1; PILRA; RAB5C; RAC2; SERPINB9; SLC2A3; TAGLN2; VASP; CLIC4; HLA-DQA1; HSP90B1; NT5E; DBI; SLC29A1; ANXA2; ATP1B3; CXCR4; NAMPT; PVR; SPTBN1; TNIK;
SH-SY5Y	19	537	2.62431	0.894613	0.724801	1	1	1	ALDOA; BCL6; CD55; ENO3; FASN; HSPA6; MXD1; RAB5C; TAGLN2; HSP90B1; LMAN1; MEP1B; DBI; HIST1H1E; SHD; TBC1D2; DPYSL3; TRIM15; TUBB6;
Adrenal cortex	4	82	0.552486	1.2357	0.408596	1	0.909027	1	FASN; ADAMTS1; BTG2; LDLR;
Cytoskeleton	4	86	0.552486	1.17823	0.44425	1	0.978503	1	GLIPR2; CANX; SPTBN1; TGM2;
Mesothelioma cells	2	29	0.276243	1.75099	0.319408	1	0.786997	1	ANXA1; ANXA2;
Joints	1	6	0.138122	4.247	0.215159	1	0.580663	1	FCGR2A;
Hematopoietic stem cells	23	200	3.1768	2.90737	4.57065e-06	0.00387591	7.17761e-05	0.000233096	C5AR1; CD55; CD93; CSF2RB; FGR; HCK; IL17RA; IRF1; ITGAM; MAP2K3; LYN; MXD1; RFX2; TGFB1; TIE1; CPOX; LAMA4; CDKN1A; CXCR4; IRS2; MAFF; NFE2; RGS1;
Pancreatic fluid	12	136	1.65746	2.23156	0.00778999	1	0.0428955	0.139305	DEFA3; DEFA1; KRT8; LYZ; TAGLN2; LAMA4; PRSS3; ACTG2; LCN2; PNLIP; SERPINA1; TGM2;
20_cys	2	96	0.276243	0.529072	0.897859	1	1	1	CFP; SERPINA1;
hupo1_b1-cit_cam	1	71	0.138122	0.359449	0.943422	1	1	1	SERPINA1;
Natural killer cell	11	106	1.51934	2.62468	0.00316134	1	0.0197119	0.0640154	CST7; CXCR2; HLA-DPA1; IL18RAP; LILRB2; LST1; NFATC2; PNRC1; SERPINB9; TIA1; KIR2DL3;
Panc1	21	346	2.90055	1.53452	0.0350977	1	0.16377	0.53185	AKAP12; ALDOA; ANXA1; CD44; COTL1; EFHD2; FASN; ICAM1; S100A11; S100A6; TAGLN2; HSP90B1; PTPRS; ANXA2; CYR61; IL1RL1; MCAM; PTX3; SEMA4B; SERPINE1; SPTBN1;
Frontal lobe	18	480	2.48619	0.948198	0.626842	1	1	1	ALOX5AP; GPR27; LRRK2; PROK2; RND1; SYT17; GIMAP2; OSGIN1; RBP5; ATP1B3; CYR61; FGF14; GFPT2; GFRA3; IER3; NR4A1; SLITRK3; SYNE2;
Beta cells	1	15	0.138122	1.7005	0.454383	1	0.993085	1	GCK;
Pons	4	134	0.552486	0.756211	0.781643	1	1	1	DGAT2; GIMAP2; OSGIN1; SYNE2;
Breast milk	5	73	0.690608	1.73417	0.162321	1	0.477944	1	ALDOA; FASN; TLR2; ANXA2; TACSTD2;
Lymphocytes	44	468	6.07735	2.37647	1.02661e-07	8.70566e-05	2.80528e-06	9.11028e-06	ADRB2; ALOX5; CCL4; CD44; CD83; CSF3R; CXCR2; FGR; ICAM1; ITGAM; ITGB2; MX2; PIM1; PTPRE; SELL; SERPINB9; SLC11A1; STAT3; VASP; LMAN1; MAF; MCFD2; SEPSECS; TIA1; TOB1; BRCA1; P2RY2; ANXA2; CCL20; CD274; CLCF1; CXCR4; F3; GEM; HDC; IER3; IL24; IL4R; IRS2; NAMPT; SAA1; SYN1; SYNE2; ZFP36;
Globus pallidus	1	23	0.138122	1.10928	0.605115	1	1	1	CALCA;
01_glyco	25	667	3.45304	0.947582	0.639823	1	1	1	ALDOA; CD44; CD55; COTL1; ERBB2; FASN; ICAM1; LMNB1; RAC2; SELL; CANX; CLIC4; HSP90B1; LMAN1; SEC63; P4HA1; GDF15; CPB2; ANXA2; ARG2; EPHA2; MTHFD2; RRP12; SERPINA1; SPTBN1;
Nucleus accumbens	5	166	0.690608	0.762674	0.790781	1	1	1	PROK2; GIMAP2; OSGIN1; RBP5; SYNE2;
Bronchoalveolar fluid	13	186	1.79558	1.76757	0.0339026	1	0.159719	0.518694	ALDOA; ANXA1; CD44; ICAM1; LSP1; RAB26; S100P; VASP; PKD2; ANXA2; MYH11; SYN1; TGM2;
Corneal stromal cell	3	6	0.414365	12.6569	0.00112814	0.956661	0.00803917	0.0261076	CXCL1; CXCL6; SERPINA1;
21_unfract	2	95	0.276243	0.534641	0.894518	1	1	1	SAA1; SERPINA1;
CD4 cell	1	42	0.138122	0.607581	0.816883	1	1	1	SERPINB9;
Bronchial epithelial cells	13	69	1.79558	4.76432	2.61304e-06	0.00221586	4.52215e-05	0.000146859	CD44; CXCL1; CXCL3; F2RL1; IL1RN; S100A11; BTG2; CSF3; CXCL6; IL4R; OSMR; PFKFB3; SERPINA1;
Frontal cortex	6	113	0.828729	1.34398	0.290014	1	0.73194	1	CNDP1; PDE4B; WNK3; NLGN4Y; CYR61; GFRA3;
Kidney cancer	19	352	2.62431	1.36478	0.106814	1	0.372951	1	HIVEP1; KRT8; PECAM1; WASL; COL1A2; EFEMP1; LAMA4; TBX3; ACTG2; KRT80; MAFF; MYOM1; SERPINA1; SIPA1L2; TGM2; THBS1; TUBB6; URB2; VCAN;
Umbilical vein endothelial cells	21	178	2.90055	2.98275	7.89838e-06	0.00669782	0.000119604	0.00038842	CFP; CXCL1; CXCR2; F2RL1; FOSL2; PECAM1; STAT3; PRKCZ; ATF3; CD274; CXCR4; CYR61; EGR1; KLF5; MTHFD2; NR4A1; PHLDA1; PTGS2; PTX3; SERPINE1; SRGN;
B lymphoblast	1	8	0.138122	3.18658	0.276063	1	0.69881	1	SLC11A1;
Eyes	3	122	0.414365	0.623457	0.866184	1	1	1	IGFBP2; CRYAA; FOXC1;
H2228	12	168	1.65746	1.80652	0.0351487	1	0.16377	0.53185	ANXA1; LYN; STAT3; TAGLN2; WASL; LPP; ANXA2; EPHA2; GPRC5A; IRS2; LDLR; MAP1B;
Dentate nucleus	2	14	0.276243	3.62571	0.103959	1	0.370409	1	CALCA; NRG1;
Stratum granulosum	1	9	0.138122	2.83291	0.304721	1	0.755566	1	CSTA;
Bone marrow stromal cells	4	19	0.552486	5.33087	0.00586055	1	0.0335794	0.109051	IL1RN; CSF3; FSTL3; PAPPA;
Antigen presenting cells	1	4	0.138122	6.36521	0.14914	1	0.449761	1	CD274;
Ureter	1	11	0.138122	2.3183	0.358683	1	0.830017	1	LSP1;
Tongue epithelium	1	10	0.138122	2.5499	0.332246	1	0.786997	1	S100A8;
Granulocytes	17	89	2.34807	4.82949	6.24344e-08	5.29444e-05	1.89087e-06	6.14069e-06	CD44; CFP; CSF3R; CXCR2; MGAM; MNDA; MX2; PADI4; PILRA; PIM1; S100A8; S100A9; STAT3; VNN3; CISH; JUNB; LCN2;
CD8 cell	1	45	0.138122	0.567085	0.837819	1	1	1	SERPINB9;
hupo1_b2-cit_cam	2	65	0.276243	0.78136	0.733918	1	1	1	CNDP1; SERPINA1;
Ciliary epithelium	1	9	0.138122	2.83291	0.304721	1	0.755566	1	ANXA2;
Ventricular septum	3	82	0.414365	0.927546	0.635069	1	1	1	GIMAP2; OSGIN1; SYNE2;
Peripheral blood leukocytes	10	125	1.38122	2.0236	0.0266735	1	0.130463	0.423685	CST7; DEFA1; FCN1; PROK2; GRAP; CCL20; HDC; LCN2; MAP3K8; XRN2;
BJ635	15	175	2.07182	2.16747	0.00412663	1	0.0248561	0.0807212	ANXA1; FCER1G; FCGR2A; LST1; LYN; PECAM1; STAT3; TAGLN2; VASP; LPP; C11orf52; ANXA2; FCAR; GPRC5A; TAGLN;
Mesenchymal stromal cells	16	178	2.20994	2.27291	0.00192597	1	0.0129621	0.042095	CD44; ERGIC1; HMOX1; SLC16A3; MYADM; CANX; LMAN1; NT5E; SEC22B; SEC61A1; TMED2; ATP1B3; ATP2B4; MCAM; PPAP2B; PVR;
Osteoblasts	4	52	0.552486	1.94847	0.149567	1	0.449761	1	IGFBP1; CHI3L1; PAPPA; PTGS2;
H1703	9	138	1.24309	1.64987	0.0972368	1	0.351199	1	ANXA1; SGMS2; STAT3; TAGLN2; ZYX; LPP; ANXA2; EPHA2; LDLR;
T lymphocytes	3	32	0.414365	2.37638	0.131605	1	0.414874	1	BCL6; CCL3; RGS2;
Cellzome_Abl_inhibitors_NatureBiotechnology_exp142	1	83	0.138122	0.307487	0.965219	1	1	1	LYN;
Adipose tissue	16	155	2.20994	2.61016	0.000436855	0.370453	0.003497	0.0113567	CETP; DGAT2; EMP3; IL1RN; MXD1; PLEK; PTPN1; SLC2A3; PTPRS; LAMA4; MOGAT2; AGPAT9; IL6; IRS2; LEPR; SERPINE1;
WM1158	17	212	2.34807	2.02761	0.0046495	1	0.0271916	0.0883059	ALDOA; ANXA1; FASN; SOD2; S100A9; TAGLN2; COL1A2; SEC22B; HIST1H4B; HIST1H4E; MYL6B; ADAM19; ANXA2; DPYSL3; LAMC2; MYH11; THBS1;
Scalp	1	34	0.138122	0.750499	0.746898	1	1	1	SRD5A2;
Occipital pole	5	129	0.690608	0.981409	0.582134	1	1	1	GPR27; RND1; SYT17; CYR61; SLITRK3;
Chondrocytes	14	65	1.9337	5.4462	1.90777e-07	0.000161779	4.62226e-06	1.5011e-05	CD44; CXCL1; CXCR2; IL17RA; MAF; CCL20; CHI3L1; CXCL6; CXCR4; CYP27B1; EGR1; IL6; JUNB; PTGS2;
hupo55_b1-cit_cam	5	78	0.690608	1.62302	0.195862	1	0.546353	1	CFP; DEFA1B; DEFA1; SAA1; SERPINA1;
Mature gut mucosal epithelium	1	2	0.138122	12.6987	0.077575	1	0.294994	0.958006	SIGIRR;
Tongue	3	54	0.414365	1.40841	0.361037	1	0.830017	1	PECAM1; OGG1; LAMC2;
Adrenal medulla	2	71	0.276243	0.715339	0.777258	1	1	1	ADAMTS1; BTG2;
N06cs110	13	87	1.79558	3.77871	3.59541e-05	0.0304891	0.000417659	0.00135637	ALDOA; DEFA1B; DEFA1; LYN; STAT3; VASP; ANXA2; FCAR; FCGR1A; IRS2; NAMPT; TAGLN; TGM2;
Parotid gland	1	32	0.138122	0.797391	0.725573	1	1	1	ALDH1A3;
Cerebellar cortex	2	59	0.276243	0.860807	0.683606	1	1	1	SYT17; FGF14;
BOB2L	2	96	0.276243	0.529072	0.897859	1	1	1	CPB2; SERPINA1;
Bowmann's capsule	1	7	0.138122	3.64115	0.246225	1	0.636582	1	SDC4;
Peripheral blood cells	12	140	1.65746	2.1678	0.00971592	1	0.0514944	0.16723	CR1; CST7; DEFA1B; LSP1; MYADM; NFATC2; RASSF2; MTMR4; MT1H; FRAT1; CDH19; RUNX1;
Arteries	5	30	0.690608	4.21898	0.00599177	1	0.0341008	0.110744	CD44; HMOX1; NCF4; ACTG2; VCAN;
Choroid	7	32	0.966851	5.53437	0.000208941	0.177182	0.00186508	0.00605692	ICAM1; PECAM1; TLR1; CCL2; CXCL6; MMP10; RAB27A;
Syncytiotrophoblast	3	54	0.414365	1.40841	0.361037	1	0.830017	1	SERPINB9; PAPPA; SERPINA1;
Ascending colon	4	50	0.552486	2.02639	0.135012	1	0.424037	1	GIMAP2; MOGAT2; OSGIN1; MUC17;
Neurons	3	68	0.414365	1.11848	0.507827	1	1	1	CD44; GPM6B; MAP1B;
Zona glomerulosa	1	9	0.138122	2.83291	0.304721	1	0.755566	1	NR4A2;
Oculomotor nucleus	1	1	0.138122	25.2718	0.0395693	1	0.169469	0.550357	NRG1;
Lymph	1	22	0.138122	1.15968	0.588825	1	1	1	IGFBP2;
Hematopoietic cells	2	22	0.276243	2.30787	0.215695	1	0.580663	1	FASN; HCK;
Tunica adventitia	1	1	0.138122	25.2718	0.0395693	1	0.169469	0.550357	VCAN;
Purkinje cells	1	35	0.138122	0.729063	0.756932	1	1	1	NRG1;
Melanoma cells	2	47	0.276243	1.08054	0.560046	1	1	1	ANXA2; MCAM;
Umbilical cord	3	34	0.414365	2.23664	0.150115	1	0.449815	1	CPD; SERPINB2; SIRPA;
Antrum	2	22	0.276243	2.30787	0.215695	1	0.580663	1	HDC; SERPINB8;
Malignant ascites	1	5	0.138122	5.09471	0.182815	1	0.515041	1	ERBB2;
Cornea	5	82	0.690608	1.54385	0.224263	1	0.60182	1	ICAM1; FOXC1; IL4R; SERPINB2; TGFB3;
Retinal pigmented epithelial cells	6	51	0.828729	2.97752	0.0149058	1	0.0761454	0.247286	CXCL3; IL1RN; SLC16A3; SLC6A6; P2RY2; RAB27A;
18_size	4	104	0.552486	0.974327	0.593576	1	1	1	DEFA1B; DEFA1; CPB2; SERPINA1;
Decidua	8	43	1.10497	4.70651	0.000245314	0.208026	0.00216694	0.00703724	ALOX5; CD44; FASN; IGFBP2; IGFBP1; CSF3; CYP27B1; PAPPA;
16_clinprot_c8	2	92	0.276243	0.552073	0.883877	1	1	1	SAA1; SERPINA1;
Spermatocytes	2	42	0.276243	1.20915	0.499279	1	1	1	SERPINB9; BRCA1;
Descending colon	4	56	0.552486	1.80932	0.180334	1	0.515041	1	GIMAP2; MOGAT2; OSGIN1; MUC17;
Villus	1	10	0.138122	2.5499	0.332246	1	0.786997	1	MUC17;
Collecting duct	1	23	0.138122	1.10928	0.605115	1	1	1	KCNK1;
b1-SE_nonglyco_qstar	4	90	0.552486	1.12587	0.479222	1	1	1	CNDP1; CPB2; SERPINA1; THBS1;
Eosinophils	20	100	2.76243	5.05637	1.86019e-09	1.57744e-06	1.43404e-07	4.6571e-07	ALOX5AP; CD52; CLC; CR1; CSF2RB; CXCL1; F2RL1; FGR; ICAM1; ITGAM; LYN; NCF4; PDE4B; SELL; NT5E; CCL20; FCAR; IL4R; SERPINA1; TNFRSF10D;
Vascular endothelium	6	40	0.828729	3.79613	0.00457579	1	0.0269463	0.0875095	CD44; CFP; HLA-DPA1; IER3; MCAM; PTX3;
Prostrate	1	15	0.138122	1.7005	0.454383	1	0.993085	1	SAA1;
Glomerular mesangial cell	2	13	0.276243	3.9044	0.0914225	1	0.335612	1	FCAMR; HMOX1;
Myocardium	3	30	0.414365	2.53476	0.113973	1	0.372951	1	NT5E; PTX3; RGS2;
Occipital cortex	2	39	0.276243	1.30213	0.460323	1	1	1	NLGN4Y; CYR61;
AdducinII	7	116	0.966851	1.52707	0.176242	1	0.510079	1	CFP; CPB2; HIST1H4B; HIST1H4E; PAPPA; SERPINA1; THBS1;
Granulosa lutein cells	4	28	0.552486	3.61799	0.023394	1	0.116695	0.378972	PECAM1; P2RY2; BTG2; HBEGF;
Proximal convoluted tubule	2	32	0.276243	1.58689	0.363133	1	0.830017	1	BTG2; MUC17;
Leydig cells	3	36	0.414365	2.11241	0.169395	1	0.495333	1	FLT1; DBI; CXCR4;
Myeloid stem cell	6	16	0.828729	9.48678	2.14211e-05	0.0181651	0.000271121	0.000880477	S100A8; S100A9; SERPINB9; FCAR; LCN2; ZFP36;
Thyroid follicular cells	1	12	0.138122	2.12527	0.384075	1	0.863915	1	BTG2;
BOB_Sensitivity	5	129	0.690608	0.981409	0.582134	1	1	1	ERGIC1; S100A8; S100A9; CPB2; SERPINA1;
Pulmonary artery	2	15	0.276243	3.38416	0.116927	1	0.379901	1	HMOX1; F3;
Cellzome_Abl_inhibitors_NatureBiotechnology_exp143	1	87	0.138122	0.293351	0.970428	1	1	1	LYN;
Gastric mucosa	3	33	0.414365	2.30439	0.140757	1	0.44045	1	GSTT1; EGR1; HDC;
CSF	2	12	0.276243	4.2295	0.0793745	1	0.300489	0.975852	IGFBP2; GDF15;
Skin fibroblasts	15	162	2.07182	2.34139	0.00196997	1	0.0130511	0.042384	CXCL1; HMOX1; SDC4; SRD5A2; CPD; P4HA1; ANXA2; C2CD4B; CCL20; CYR61; IL24; LDLR; PAPPA; PTGS2; TAGLN;
Alveolar macrophage	1	18	0.138122	1.41724	0.516676	1	1	1	SERPINA1;
Urothelium	2	33	0.276243	1.53881	0.377479	1	0.857806	1	FASN; FLT1;
Islets of Langerhans	9	135	1.24309	1.68653	0.087702	1	0.327627	1	ALDOA; KRT8; SOD2; HSP90B1; ANXA2; CCL20; GAD2; PFKFB3; SERPINB8;
Gingival epithelium	1	8	0.138122	3.18658	0.276063	1	0.69881	1	IL1R2;
Pharynx	1	10	0.138122	2.5499	0.332246	1	0.786997	1	SERPINB8;
Atrium	5	146	0.690608	0.867143	0.690183	1	1	1	GIMAP2; OSGIN1; KCNK1; RGS2; SYNE2;
Corpus luteum	1	12	0.138122	2.12527	0.384075	1	0.863915	1	MCAM;
Parietal lobe	2	111	0.276243	0.457583	0.937472	1	1	1	OSGIN1; SYNE2;
Cardiac muscle	6	64	0.828729	2.37281	0.0405201	1	0.172668	0.560749	IGFBP1; CCL14; MB; TRIM55; MYOM1; SYNE2;
Uterine myometrium	5	77	0.690608	1.64409	0.188968	1	0.52886	1	HMGA1; PECAM1; FOS; GNAO1; PTGS2;
Sebaceous glands	7	29	0.966851	6.10669	0.000107437	0.0911066	0.0010472	0.00340084	CD44; DGAT2; FADS2; FASN; CANX; DBI; KLF5;
Neural stem cells	3	67	0.414365	1.13517	0.497877	1	1	1	CELSR2; SYNE2; THBS1;
Spermatozoa	5	102	0.690608	1.24117	0.378325	1	0.857806	1	CD52; DHODH; DBI; ACTG2; DEFB118;
Choroid plexus	1	18	0.138122	1.41724	0.516676	1	1	1	GDF15;
Large intestine	4	39	0.552486	2.59779	0.0670979	1	0.272859	0.886123	FASN; MEP1B; BTG2; SAA1;
Oocytes	1	38	0.138122	0.67152	0.784712	1	1	1	DPPA3;
Hair follicle	7	83	0.966851	2.13414	0.0459797	1	0.194954	0.633122	CD44; F2RL1; S100A8; S100A9; TLE3; KLF5; SERPINB8;
Cytotrophoblasts	4	39	0.552486	2.59779	0.0670979	1	0.272859	0.886123	FAM65B; HMGA1; SERPINB9; AFP;
Glomerulus	4	44	0.552486	2.30265	0.0952196	1	0.348044	1	CFP; NT5E; GNAO1; PFKFB3;
Bile duct	3	31	0.414365	2.45302	0.122672	1	0.391076	1	GSTT1; TSPAN8; MUC17;
Mammary epithelium	5	75	0.690608	1.68793	0.17545	1	0.509527	1	CXCL1; FOSB; BRCA1; OSMR; PFKFB3;
Dental cells	1	4	0.138122	6.36521	0.14914	1	0.449761	1	CSF3;
Lung fibroblasts	3	27	0.414365	2.81629	0.089404	1	0.331068	1	SDC4; MYL6B; GEM;
Karpas 299	4	24	0.552486	4.22073	0.0137441	1	0.0711214	0.23097	TLR2; CYP2C9; ACSS2; LGI1;
Schwann cells	1	17	0.138122	1.50056	0.496744	1	1	1	SDC4;
B lymphocytes	4	27	0.552486	3.75194	0.020682	1	0.104395	0.339027	BCL6; SELL; CCL3; CSF3;
Malignant pleural effusions	1	31	0.138122	0.823105	0.714247	1	1	1	PTX3;
N06BJ504	6	78	0.828729	1.94697	0.0883014	1	0.328419	1	BAZ1A; STAT3; WASL; HIST1H4B; HIST1H4E; ANXA2;
Proximal tubular epithelium	1	8	0.138122	3.18658	0.276063	1	0.69881	1	HMOX1;
Paracentral gyrus	2	48	0.276243	1.05803	0.57155	1	1	1	GIMAP2; SYNE2;
Sweat glands	3	37	0.414365	2.05534	0.179289	1	0.515041	1	CD44; F2RL1; KLF5;
Trophoblast	9	44	1.24309	5.17379	4.62113e-05	0.0391872	0.000529557	0.00171976	CSF3R; PECAM1; CPD; GDF15; ASCL2; CXCR4; MAGEA10; PAPPA; SERPINB2;
Vascular endothelial cells	9	63	1.24309	3.61369	0.000789954	0.669881	0.00599024	0.0194536	CFP; SERPINB9; NT5E; GNAO1; C2CD4A; C2CD4B; EGR1; KLF4; NR4A1;
Tooth	4	32	0.552486	3.16588	0.0363229	1	0.168316	0.546615	COL1A2; LAMC2; MCAM; MSX1;
Dentate gyrus	1	26	0.138122	0.981333	0.650217	1	1	1	NRG1;
Thymic epithelial cells	1	8	0.138122	3.18658	0.276063	1	0.69881	1	HLA-DPA1;
Nephron	1	6	0.138122	4.247	0.215159	1	0.580663	1	STC1;
Langerhans cells	5	17	0.690608	7.44336	0.000398034	0.337533	0.00327245	0.0106274	ALOX5; CD83; CLEC7A; IL1R2; CCL20;
Bones	1	2	0.138122	12.6987	0.077575	1	0.294994	0.958006	IGFBP2;
Vas deferens	2	17	0.276243	2.98626	0.143945	1	0.442267	1	CD52; MYH11;
Anterior pituitary	1	1	0.138122	25.2718	0.0395693	1	0.169469	0.550357	FASN;
Chorion	2	14	0.276243	3.62571	0.103959	1	0.370409	1	CPD; RASD1;
Larynx	1	10	0.138122	2.5499	0.332246	1	0.786997	1	OGG1;
Microglia	2	17	0.276243	2.98626	0.143945	1	0.442267	1	CXCR2; IL1R2;
Blastocyst	1	9	0.138122	2.83291	0.304721	1	0.755566	1	DNMT3L;
Proerythroblast	1	5	0.138122	5.09471	0.182815	1	0.515041	1	PAPPA;
T-lymphoblast	2	11	0.276243	4.61365	0.0678764	1	0.272859	0.886123	SLC11A1; SRGN;
Veins	1	10	0.138122	2.5499	0.332246	1	0.786997	1	VCAN;
Colon mucosa	2	46	0.276243	1.10403	0.548323	1	1	1	CST7; RNF43;
Hypoglossal nucleus	1	3	0.138122	8.47989	0.114079	1	0.372951	1	NRG1;
Bronchoalveolar lavage fluid	1	4	0.138122	6.36521	0.14914	1	0.449761	1	ICAM1;
Seminiferous tubule	2	23	0.276243	2.20757	0.230456	1	0.614551	1	FASN; FLT1;
Spermatids	1	38	0.138122	0.67152	0.784712	1	1	1	HIST1H1A;
Reticulocytes	1	25	0.138122	1.02057	0.635786	1	1	1	CD44;
Follicular fluid	1	2	0.138122	12.6987	0.077575	1	0.294994	0.958006	SERPINA1;
Pancreatic acinus	2	17	0.276243	2.98626	0.143945	1	0.442267	1	F2RL1; PFKFB3;
Umbilical vein	1	10	0.138122	2.5499	0.332246	1	0.786997	1	CPD;
Parahippocampal gyrus	1	13	0.138122	1.96191	0.408463	1	0.909027	1	NRG1;
Coronary arteries	1	32	0.138122	0.797391	0.725573	1	1	1	HDC;
BOB2L_ISB	2	87	0.276243	0.583798	0.863912	1	1	1	CPB2; SERPINA1;
Plasma cells	2	21	0.276243	2.41772	0.201024	1	0.557086	1	RELB; SAA1;
Rods	2	11	0.276243	4.61365	0.0678764	1	0.272859	0.886123	RGS1; RPGR;
Hilus	1	3	0.138122	8.47989	0.114079	1	0.372951	1	NRG1;
Entorhinal cortex	1	7	0.138122	3.64115	0.246225	1	0.636582	1	NRG1;
Nose	1	50	0.138122	0.510388	0.867535	1	1	1	OR4F3;
Insular cortex membrane micro domains	7	75	0.966851	2.36175	0.0286735	1	0.13627	0.442544	ALDOA; GLIPR2; WNK3; GPM6B; MAP1B; SOCS1; SPTBN1;
Mononuclear phagocytes	4	12	0.552486	8.43795	0.000933135	0.791299	0.00694122	0.0225419	FPR2; IL1R2; FCAR; PTX3;
Duodenum epithelium	1	7	0.138122	3.64115	0.246225	1	0.636582	1	FASN;
Breast cancer cells	2	36	0.276243	1.41061	0.419655	1	0.926738	1	ERBB2; ANXA2;
Osteocytes	1	5	0.138122	5.09471	0.182815	1	0.515041	1	CHI3L1;
Zona fasciculata	2	11	0.276243	4.61365	0.0678764	1	0.272859	0.886123	FASN; NR4A2;
Alveolus	2	14	0.276243	3.62571	0.103959	1	0.370409	1	F3; PFKFB3;
Neuroglia	1	11	0.138122	2.3183	0.358683	1	0.830017	1	GPM6B;
Yolk sac	1	5	0.138122	5.09471	0.182815	1	0.515041	1	AFP;
Intestinal epithelium	2	24	0.276243	2.11563	0.24528	1	0.636582	1	NT5E; CCL20;
Articular cartilage	3	17	0.414365	4.47196	0.0277257	1	0.132915	0.431649	CD44; IL1RN; SLC2A3;
Subthalamus	1	10	0.138122	2.5499	0.332246	1	0.786997	1	CALCA;
Myeloid	4	5	0.552486	20.2275	1.17773e-05	0.00998719	0.000163724	0.000531703	S100A8; S100A9; LCN2; SPTBN1;
Cerebrum	3	30	0.414365	2.53476	0.113973	1	0.372951	1	SLC2A3; MAP1B; OSMR;
Peyer's patches	1	10	0.138122	2.5499	0.332246	1	0.786997	1	PVR;
Synovial cells	3	5	0.414365	15.1832	0.000581179	0.49284	0.00448037	0.0145502	IL1R2; CHI3L1; EGR1;
Stratum corneum	1	6	0.138122	4.247	0.215159	1	0.580663	1	CSTA;
Nasal tissue epithelial cells	2	24	0.276243	2.11563	0.24528	1	0.636582	1	CXCL3; IL1RN;
Renal tubule	1	18	0.138122	1.41724	0.516676	1	1	1	S100A11;
Locus coeruleus	1	17	0.138122	1.50056	0.496744	1	1	1	CALCA;
051503_BAL20_gly_lec	1	30	0.138122	0.850533	0.702454	1	1	1	SERPINA1;
Seminal plasma	1	8	0.138122	3.18658	0.276063	1	0.69881	1	PAPPA;
Basophils	5	28	0.690608	4.52023	0.00440985	1	0.0263349	0.0855238	CLC; CXCR2; FCER1G; NCF4; SELL;
Amnion	2	16	0.276243	3.17278	0.130272	1	0.412205	1	CPD; RASD1;
Cones	1	11	0.138122	2.3183	0.358683	1	0.830017	1	RPGR;
Colon epithelium	2	32	0.276243	1.58689	0.363133	1	0.830017	1	CXCL3; IL1RN;
Basal cell	1	3	0.138122	8.47989	0.114079	1	0.372951	1	NFIL3;
Lungs	1	1	0.138122	25.2718	0.0395693	1	0.169469	0.550357	CCL3;
Intestinal mucosa	1	8	0.138122	3.18658	0.276063	1	0.69881	1	CXCR4;
PNS	1	17	0.138122	1.50056	0.496744	1	1	1	VCAN;
Cerebral neurons	1	7	0.138122	3.64115	0.246225	1	0.636582	1	FASN;
Renal tubular epithelium	1	10	0.138122	2.5499	0.332246	1	0.786997	1	PFKFB3;
HUPO28_b1-CIT	1	37	0.138122	0.689664	0.775823	1	1	1	SERPINA1;
Oesophagus epithelium	2	11	0.276243	4.61365	0.0678764	1	0.272859	0.886123	S100A8; KLF4;
Pancreatic duct	2	17	0.276243	2.98626	0.143945	1	0.442267	1	BTG2; PFKFB3;
Gingiva	1	11	0.138122	2.3183	0.358683	1	0.830017	1	EGR1;
Uterine stromal cells	1	10	0.138122	2.5499	0.332246	1	0.786997	1	CXCL1;
White matter	1	13	0.138122	1.96191	0.408463	1	0.909027	1	NRG1;
Lymphoid stem cell	2	17	0.276243	2.98626	0.143945	1	0.442267	1	RELB; SPTBN1;
Adenohypophysis	2	13	0.276243	3.9044	0.0914225	1	0.335612	1	FASN; CYP3A5;
Lactiferous ducts	2	4	0.276243	12.6674	0.00889555	1	0.0480473	0.156036	FASN; S100A11;
Testin	1	1	0.138122	25.2718	0.0395693	1	0.169469	0.550357	RPGR;
Th(1) cell	1	2	0.138122	12.6987	0.077575	1	0.294994	0.958006	HAVCR2;
Ileum epithelium	1	3	0.138122	8.47989	0.114079	1	0.372951	1	IL1RN;
Superior colliculus	2	4	0.276243	12.6674	0.00889555	1	0.0480473	0.156036	CALCA; NRG1;
Vagus nucleus	1	2	0.138122	12.6987	0.077575	1	0.294994	0.958006	NRG1;
Follicular dendritic cells	1	2	0.138122	12.6987	0.077575	1	0.294994	0.958006	PVR;
Ovarian follicular fluid	2	5	0.276243	10.139	0.0144385	1	0.074205	0.240984	IGFBP1; SERPINA1;
Conjunctiva	1	10	0.138122	2.5499	0.332246	1	0.786997	1	MUC17;
Hofbauer cells	1	3	0.138122	8.47989	0.114079	1	0.372951	1	SERPINA1;
Inferior olivary nuclear complex	1	3	0.138122	8.47989	0.114079	1	0.372951	1	NRG1;
Synovial fluid	1	1	0.138122	25.2718	0.0395693	1	0.169469	0.550357	IGFBP2;
Buccal epithelium	1	3	0.138122	8.47989	0.114079	1	0.372951	1	S100A8;
Vascular system	1	6	0.138122	4.247	0.215159	1	0.580663	1	MCAM;
Pancreatic islet cells	1	2	0.138122	12.6987	0.077575	1	0.294994	0.958006	CCL20;
Red nucleus	2	7	0.276243	7.24625	0.0287646	1	0.13627	0.442544	CALCA; NRG1;
Cervical mucus	1	5	0.138122	5.09471	0.182815	1	0.515041	1	PAPPA;
Podocyte	1	12	0.138122	2.12527	0.384075	1	0.863915	1	PTGS2;
White adipose tissue	1	10	0.138122	2.5499	0.332246	1	0.786997	1	HCAR3;
Cranial nerve	1	3	0.138122	8.47989	0.114079	1	0.372951	1	CALCA;
Alveoli	1	3	0.138122	8.47989	0.114079	1	0.372951	1	F3;
Corpus	1	5	0.138122	5.09471	0.182815	1	0.515041	1	HDC;
Umbilical artery	2	8	0.276243	6.3416	0.0373608	1	0.169422	0.550206	CPD; MYH11;
B cell	1	3	0.138122	8.47989	0.114079	1	0.372951	1	IL4R;
Kupffer cell	2	8	0.276243	6.3416	0.0373608	1	0.169422	0.550206	CR1; FCAR;
Pericardial fluid	1	2	0.138122	12.6987	0.077575	1	0.294994	0.958006	IL6;
Pars compacta	1	2	0.138122	12.6987	0.077575	1	0.294994	0.958006	NRG1;
Inferior colliculus	1	3	0.138122	8.47989	0.114079	1	0.372951	1	CALCA;
Peripheral blood lymphocytes	2	3	0.276243	16.8758	0.00456755	1	0.0269463	0.0875095	CKAP2; SYNE2;
Lymphoid	1	4	0.138122	6.36521	0.14914	1	0.449761	1	SPTBN1;
Megakaryoblast	1	2	0.138122	12.6987	0.077575	1	0.294994	0.958006	RUNX1;
Prostate cancer cell	1	6	0.138122	4.247	0.215159	1	0.580663	1	AAED1;
Faeces	1	1	0.138122	25.2718	0.0395693	1	0.169469	0.550357	SERPINA1;
Anterior commissure	1	1	0.138122	25.2718	0.0395693	1	0.169469	0.550357	CALCA;
Muscle fibre	1	3	0.138122	8.47989	0.114079	1	0.372951	1	MB;
Ventral tegmentum	1	2	0.138122	12.6987	0.077575	1	0.294994	0.958006	NR4A2;
Adipoblast	1	1	0.138122	25.2718	0.0395693	1	0.169469	0.550357	NCF4;
Granulosa cell	1	2	0.138122	12.6987	0.077575	1	0.294994	0.958006	PECAM1;
Sweat	1	3	0.138122	8.47989	0.114079	1	0.372951	1	DBI;
Mesangial cell	1	1	0.138122	25.2718	0.0395693	1	0.169469	0.550357	SERPINE1;
Fornix	1	1	0.138122	25.2718	0.0395693	1	0.169469	0.550357	CALCA;

## Sheet: Transcription factor
Analysis: Transcription factor
Dataset name: SH
Transcription factor	No. of genes in the dataset	No. of genes in the background dataset	Percentage of genes	Fold enrichment	P-value (Hypergeometric test)	Bonferroni method	BH method	Q-value (Storey-Tibshirani method)	genes mapped (from input data set)
MAFB	13	352	2.14521	0.930247	0.646324	1	0.869544	0.980062	ELMSAN1; LMNB1; CREB5; LRRK2; SGCE; TRAF4; SLC39A8; NCAM2; FOS; OSGIN1; RORC; CIT; LIN28B;
NFIC	141	2040	23.2673	1.73978	1.00955e-11	2.12005e-09	2.12005e-09	2.38951e-09	ALDOA; ALOX5; BAZ1A; BIRC3; CCL4; CD83; CSF2RB; CXCL1; CXCL3; DTX4; ELMSAN1; EMP3; ENO3; FADS2; FAM107A; FAM129A; FAM65B; FCAMR; FGR; FLT1; FOSL2; GATA4; GATAD2A; HIVEP1; ICAM1; IL1RN; IRF1; ITPKC; KCNJ15; KDM6B; MAP2K3; CREB5; LPGAT1; BCL3; MLXIP; MMP25; MMP9; MYADM; NFATC2; PDE4B; PIM1; PIM3; PLBD1; PLEK; PLIN1; PROK2; RAB5C; RAC2; RALGDS; RASSF5; RELB; RND1; S100A8; SBNO2; SDC4; SGCE; SIN3A; S…
NR1H3	43	1020	7.09571	1.06131	0.36414	1	0.621702	0.70072	CETP; FADS2; FAM65B; G0S2; LSP1; MID1IP1; BCL3; QPCT; RPS6KA5; SBNO2; SGCE; SIN3A; SLC16A6; TIE1; TLE3; TRAF4; AUTS2; HMBOX1; MUM1; PTPRS; RTP3; SYT17; TWF1; AMOT; ANKS4B; CSRNP3; PCDH18; RMND1; RNF43; SLC22A7; TCAP; TEF; ADAMTS4; CCL20; CD274; CHSY3; HAS2; MAPK4; MBNL2; RUNX1; SOCS2; SPTBN1; TGFB3;
PITX3	11	265	1.81518	1.04568	0.484631	1	0.74292	0.837344	KDM6B; CREB5; PDE4B; SGCE; AUTS2; TIGD2; CDH19; CYP27B1; EPHA2; FGF14; MBNL2;
RXRA	47	1113	7.75578	1.06308	0.351408	1	0.606367	0.683435	C16orf54; FAM65B; FCAMR; G0S2; LSP1; MAP1LC3A; MMP19; NRIP1; PTPRE; QPCT; RASSF5; SBNO2; SGCE; TIE1; TRAF4; HMBOX1; KLF3; MUM1; RTP3; ANKS4B; CPOX; CSRNP3; GCK; PCDH18; RMND1; RNF43; SLC22A7; TCAP; C17orf96; CCL20; CNN1; EPHA2; FSTL3; HOMER1; IVNS1ABP; LCN2; MAP1B; MBNL2; MSX1; NFKBIZ; NR4A1; RASL10A; RBPMS; RUNX1; SOCS2; SPTBN1; ZFYVE27;
SOAT1	75	1261	12.3762	1.49719	0.000256338	0.053831	0.00358873	0.00404486	ADRB2; CDC42BPA; ICAM1; IL1R2; IRF1; ITPKC; KCNJ15; KRT8; CREB5; LSP1; MAP3K14; MID1IP1; BCL3; MMP25; MPEG1; NFATC2; NFIL3; NRIP1; PDE4B; PLXNC1; PROK2; QPCT; RASSF5; RNF19B; SBNO2; SLC16A6; SOCS3; SORT1; SP1; STC1; SYT12; VASP; YBX3; ZYX; COL1A2; WNK3; ZNF652; ACBD5; AMOT; IFIT2; KCNK5; RAPGEFL1; SAMD3; SLC29A1; SPHK2; TBX3; ADAMTS4; ARID5B; CACNG2; CCL2; CCL3; EGR1; ETV7; FCGR1A; FRMD6; GADD45B…
STAT1	75	1261	12.3762	1.49719	0.000256338	0.053831	0.00358873	0.00404486	ADRB2; CDC42BPA; ICAM1; IL1R2; IRF1; ITPKC; KCNJ15; KRT8; CREB5; LSP1; MAP3K14; MID1IP1; BCL3; MMP25; MPEG1; NFATC2; NFIL3; NRIP1; PDE4B; PLXNC1; PROK2; QPCT; RASSF5; RNF19B; SBNO2; SLC16A6; SOCS3; SORT1; SP1; STC1; SYT12; VASP; YBX3; ZYX; COL1A2; WNK3; ZNF652; ACBD5; AMOT; IFIT2; KCNK5; RAPGEFL1; SAMD3; SLC29A1; SPHK2; TBX3; ADAMTS4; ARID5B; CACNG2; CCL2; CCL3; EGR1; ETV7; FCGR1A; FRMD6; GADD45B…
DLX2	13	171	2.14521	1.91484	0.0190176	1	0.102403	0.115418	CDC42EP3; HMGA1; NRIP1; RIPK4; STAT3; COL1A2; ZNF385B; P4HA1; CSRNP3; OSCP1; PCDH18; BACH2; MSX1;
DLX3	23	413	3.79538	1.40227	0.0651619	1	0.208035	0.234476	BASP1; ELMSAN1; HMGA1; LMNB1; CREB5; PDE11A; PTPRE; RIPK4; YBX3; CANX; COL1A2; FANCL; PREPL; ZNF385B; FRAT1; HEXIM2; OSCP1; APOLD1; GRHL1; PRRX1; SERPINB2; TACSTD2; WT1;
ETS1	130	2496	21.4521	1.31101	0.000496796	0.104327	0.00613689	0.00691688	ADGRG3; ARHGAP30; ARRDC4; BHLHE40; C16orf54; CASP7; CCL4; CD93; CHIC2; CORO1A; CXCR2; DOK3; DTX4; ELMSAN1; EMP1; ERGIC1; FAM129A; FOSL1; FOSL2; G0S2; GATA4; GATAD2A; HAVCR2; HMGA1; IL17RA; IL1RN; IRF1; ITPRIP; KCNJ15; KIAA0226L; LAPTM5; MAP2K3; CREB5; LSP1; LST1; MIDN; ZC3H12A; BCL3; MMP19; MXD1; NABP1; NCF2; NCF4; PDE11A; PLEK; PPRC1; QPCT; RAB20; RAC2; RASSF5; S100A11; S100A9; SBNO2; SLC11A1; S…
HNF1A	43	831	7.09571	1.30268	0.0456032	1	0.171012	0.192747	CDHR2; ERBB2; F2RL1; ITPRIP; KCNJ15; CREB5; NCF2; SGCE; TAGLN2; TNFAIP6; AUTS2; CNTN3; MAF; TSPAN8; ZNF385B; ZNF652; MYC; IGFBP1; AFP; AMOT; ANKS4B; GPAM; GRIA3; HEXIM2; HIST1H1E; LRRC19; SAMD3; SLC5A12; ARID5B; ARL14; BEND3; CLCF1; EGR1; ELF3; IVNS1ABP; KLF5; MBNL2; NCOA7; NRG1; PHYHIPL; RASD1; RUNX1; SERPINA1;
HOXC9	20	573	3.30033	0.878943	0.756946	1	0.924178	1	AKAP12; CREB5; LRRK2; AUTS2; COL1A2; ZNF385B; ACBD5; AMOT; SLC12A1; ARID5B; ETNK1; FRMD6; KLF5; LIN28B; PAPPA; PHYHIPL; RUNX1; SIPA1L2; SPTBN1; TRIM15;
IRF1	44	811	7.26073	1.36584	0.0221344	1	0.111503	0.125675	BCL2A1; CLEC7A; ELMSAN1; EMP1; GLIPR2; CREB5; LSP1; PLXNC1; PROK2; RAC2; SIN3A; SORT1; SPSB1; TIMD4; MEIS2; NHSL1; MEP1B; ASCL2; C11orf52; FAM47E; GRIA3; IFIT2; LGI1; PCDH18; RNF43; ARID5B; ATF3; CD274; CEBPD; CLCF1; CXCR4; ETNK1; ETV7; IL15RA; MSX1; NAMPT; NCOA7; NR4A2; PAPPA; PLSCR1; RUNX1; SOCS1; THBS1; WT1;
LHX3	48	1210	7.92079	0.998662	0.527174	1	0.785152	0.884944	ADRB2; ANXA1; BAZ1A; CD55; CDC42BPA; CLEC7A; EFHD2; HMGA1; CREB5; MXD1; PDE4B; PRKCI; QPCT; SGCE; SPSB1; ZNF217; AUTS2; COL1A2; SEC63; TSPAN8; ACBD5; AFP; AMOT; CCDC150; CSRNP3; KRT222; LGI1; SAMD3; TEF; ALDH1A3; CHI3L1; GPM6B; HDC; HOMER1; IRAK3; KLF5; KLF6; LYST; MAP3K8; MBNL2; NRG1; PDLIM3; PHC2; PHYHIPL; PPAP2B; PRRX1; RUNX1; VCAN;
MEF2A	79	1835	13.0363	1.08373	0.235657	1	0.454017	0.511722	ADSSL1; ALDOA; ARRDC3; C10orf10; CDC42BPA; CDC42EP3; ELMSAN1; FGR; FOSL2; GATA4; GPR27; IRF1; ITPRIP; LMNB1; CREB5; LRRK2; SLC16A3; NFIL3; PLEK; PPP3R1; PROK2; S100A4; SIN3A; TAGLN2; TMEM71; VNN2; ZNF217; ZYX; COL1A2; FANCL; SEC61A1; ZNF385B; ALPK2; IGFBP1; FOS; ACSS2; AMOT; CLGN; CSRNP3; GCK; HIST1H1A; HIST1H1E; HIST1H2BF; HIST2H2AB; HIST2H2AC; KRT222; SAMD3; TCAP; TEF; TRIM55; ACOT1; ADAMTS1; A…
NKX6-1	61	1408	10.066	1.09061	0.253555	1	0.479698	0.540667	ALOX5AP; BAZ1A; CD55; FAM65B; HAVCR2; KCNJ15; LMNB1; CREB5; NABP1; NFATC2; NRIP1; PDE4B; QPCT; SGCE; SORT1; STC1; TLE3; AUTS2; COL1A2; FANCL; NHSL1; PREPL; TWF1; ZNF385B; NCAM2; ACBD5; ACSS2; AFP; CCDC150; FMO1; FRAT1; LAMA4; LGI1; OSCP1; RNF43; SAMD3; SLC5A12; TEF; ATF3; BACH2; CLCF1; CXCR4; ETS2; FILIP1L; FOXO1; GAD2; GPM6B; KLF5; KLF6; LIN28B; LYST; NCOA7; NRG1; PHC2; PPAP2B; PRRX1; RUNX1; SIP…
OTX2	16	324	2.64026	1.24368	0.219397	1	0.443378	0.499731	ANXA1; FAM129A; KDM6B; MPEG1; PTPRE; S100A4; SGCE; SEC61A1; WNK3; HIST1H1E; SLC12A1; LYST; MSX1; PHC2; RUNX1; SLC7A1;
PHOX2A	16	442	2.64026	0.911664	0.685142	1	0.893664	1	ANXA1; BAZ1A; CREB5; ZNF217; AUTS2; COL1A2; TWF1; CCDC150; GNAO1; PCDH18; TEF; CHI3L1; GPM6B; KLF5; NRG1; TNIK;
POU2F1	98	2209	16.1716	1.11673	0.12645	1	0.305225	0.344018	ANXA1; BAZ1A; BHLHE40; CD55; CDC42BPA; CDC42EP3; CSF3R; DNMBP; DOK3; DTX4; ELMSAN1; FAM65B; HMGA1; IL1R2; ITPRIP; JUND; KCNJ15; KIAA0226L; CREB5; MID1IP1; MXD1; NRIP1; PDE11A; PDE4B; PLXNC1; RAB26; RASSF5; SERTAD1; SGCE; SLA; SLC16A6; SORT1; STAT3; STC1; TNFAIP6; WNT11; ZNF217; AUTS2; CNTN3; COL1A2; MAF; NHSL1; TSPAN8; ZNF385B; NCAM2; ANXA9; BTBD11; CCDC150; CENPQ; CSRNP3; GRIA3; HIST1H1A; HIST1H…
POU3F2	37	789	6.10561	1.18063	0.166736	1	0.3765	0.424353	ALOX5AP; ANXA1; BAZ1A; CD55; CDC42BPA; CLEC7A; CXCR2; CREB5; NRIP1; TLE3; ZNF217; AUTS2; COL1A2; MAF; ZNF385B; NCAM2; AFP; CENPQ; LGI1; LRIG3; OSCP1; ALDH1A3; ATF3; CHI3L1; FOXO1; GPM6B; HBEGF; LYST; MAP3K8; MBNL2; NR4A3; NRG1; PHC2; PPAP2B; RUNX1; SPTBN1; TNIK;
SRF	40	462	6.60066	2.17968	3.23001e-06	0.000678302	0.000339151	0.000382257	AKAP12; CDC42BPA; CDC42EP3; ELMSAN1; FOSL1; LSP1; MYADM; RAB11FIP1; SORT1; TLE3; YBX3; ZNF385B; FOSB; FOS; GNAO1; LRIG3; TRIM55; ACTG2; ADAMTS4; CACNG2; CCL3; CNN1; CYR61; EGR1; EGR3; ETS2; FILIP1L; HBEGF; JUNB; KLF6; MAPK4; MCAM; MYH11; MYOM1; NR4A1; PHC2; PHYHIPL; SLC7A1; TAGLN; THBS1;
ARID3A	52	1250	8.58086	1.04725	0.383791	1	0.634616	0.715274	BAZ1A; CDC42BPA; CFP; FCAMR; IL1RN; KIAA0226L; LMNB1; PDE11A; PDE4B; PROK2; PTPRE; QPCT; SELL; SLC16A6; SORT1; SPSB1; STAT3; TMEM154; YBX3; AUTS2; COL1A2; PREPL; TSPAN8; CYP7A1; BTBD11; C11orf52; GRIA3; JAKMIP2; LAMA4; LRIG3; NOL4; SAMD3; SLC5A12; TMEM169; ALDH1A3; ARID5B; ATP1B3; CYR61; ETNK1; ETS2; FGF14; FILIP1L; HDC; KLF5; LDLR; MAP3K8; MBNL2; NRG1; PHC2; PPAP2B; RUNX1; WT1;
EHF	22	753	3.63036	0.73569	0.951611	1	1	1	CHIC2; GATAD2A; IRF1; NABP1; RAC2; SBNO2; TAGLN2; AUTS2; HSP90B1; MEIS2; SEPSECS; TWF1; CENPQ; HIST1H4E; ONECUT1; CALCA; CCL2; ETNK1; LAMC2; NR4A2; RPGR; RUNX1;
FOXA1	42	804	6.93069	1.31512	0.0421814	1	0.162812	0.183505	AKAP12; ANXA1; CDC42EP3; CHIC2; ELMSAN1; CREB5; RND1; SGMS2; SIN3A; SLC16A6; STAT3; TLE3; ZBTB43; KLF3; MAF; NHSL1; TSPAN8; CYP7A1; FAM13A; GPAM; GRIA3; LGI1; LRIG3; PCDH18; RNF43; SAMD3; ADAMTS1; ARID5B; CDKN1A; CYR61; FGF14; IL1RL1; KLF5; MBNL2; NR4A1; PAPPA; RUNX1; SLC7A1; SRGN; SYNE2; TGFB3; VCAN;
ATF1	68	1037	11.2211	1.65069	2.84854e-05	0.00598193	0.000854562	0.000963175	ELMSAN1; EMP1; ERGIC1; FLT1; FOSL1; FOSL2; HIVEP1; ITPRIP; JUND; LMNB1; CREB5; MAP1LC3A; MLXIP; NFIL3; PNRC1; PPP1R15A; RELB; RND1; SLC25A37; STAT3; TLE3; TRAF4; UGCG; VASP; ZBTB21; NT5E; PTPRS; FOSB; FOS; DBP; GNAO1; HIST1H4E; KBTBD3; NOL4; PRKCZ; RBP5; SPHK2; TBX3; ARG2; ATP1B3; ATP2B4; BACH2; C17orf96; CALCA; EGR3; EPHA2; FILIP1L; GEM; GPM6B; GPRC5A; HOMER1; KLF11; MAFF; MBNL2; MCAM; MTHFD2; M…
CREB1	59	973	9.73597	1.52646	0.000752098	0.157941	0.00831267	0.00936919	CCL4; ELMSAN1; ERGIC1; FAM65B; FLT1; GATAD2A; HIVEP1; IL1RN; JUND; CREB5; MAP1LC3A; ZC3H12A; MLXIP; PNRC1; PPP1R15A; RELB; RIPK4; SLC25A37; STAT3; TAGLN2; TLE3; TRAF4; VASP; ZBTB21; MAF; NT5E; PTPRS; FOSB; DBP; FAM124B; FEZ1; FRAT1; HIST1H4E; KBTBD3; NOL4; PRKCZ; RBP5; SPHK2; ARG2; BACH2; CALCA; CYP27B1; EPHA2; FGF14; FILIP1L; GEM; JUN; KLF11; KRT80; MAFF; MBNL2; MCAM; NR4A2; ODF3L1; PDLIM3; SIK1…
JDP2	49	763	8.08581	1.6167	0.000621195	0.130451	0.00724728	0.0081684	CCL4; ELMSAN1; ERGIC1; FCGR2A; FLT1; GATAD2A; HIVEP1; CREB5; MAP1LC3A; MXD1; PNRC1; PPP1R15A; PTPRE; RELB; SLC25A37; TRAF4; VASP; ZBTB21; PTPRS; FOSB; CSRNP3; DBP; FAM13A; HIST1H4E; NOL4; PRKCZ; RBP5; SPHK2; ARG2; BACH2; CALCA; EPHA2; GEM; GPM6B; HOMER1; JUN; KCNK1; KLF11; KLF6; MAFF; MBNL2; MCAM; ODF3L1; PDLIM3; SPTBN1; SYN1; TAGLN; XRN2; ZFYVE27;
NFYA	106	2544	17.4917	1.04883	0.308236	1	0.548556	0.618277	ARRDC4; BAZ1A; FASN; ITPRIP; CREB5; MAP3K14; MID1IP1; MIDN; MLXIP; MPND; MXD1; PDE11A; PIM3; PNRC1; PTPN1; RASSF2; RFX2; RND1; RPS6KA5; SELL; SERTAD1; SIN3A; SORT1; SP1; STAT3; STC1; TLE3; TPSAB1; TRAF4; ZFP36L2; AUTS2; CBX5; COL1A2; CPD; HSP90B1; LMAN1; MAF; MANEA; MTMR4; NHSL1; TMEM50B; ZNF652; FOSB; ASPM; CKAP2; DBI; DBP; FAM13A; GPAM; GRIA3; HEXIM2; HIST1H2BF; HIST1H3C; HIST2H2AB; HIST2H2AC; …
PLAU	68	1037	11.2211	1.65069	2.84854e-05	0.00598193	0.000854562	0.000963175	ELMSAN1; EMP1; ERGIC1; FLT1; FOSL1; FOSL2; HIVEP1; ITPRIP; JUND; LMNB1; CREB5; MAP1LC3A; MLXIP; NFIL3; PNRC1; PPP1R15A; RELB; RND1; SLC25A37; STAT3; TLE3; TRAF4; UGCG; VASP; ZBTB21; NT5E; PTPRS; FOSB; FOS; DBP; GNAO1; HIST1H4E; KBTBD3; NOL4; PRKCZ; RBP5; SPHK2; TBX3; ARG2; ATP1B3; ATP2B4; BACH2; C17orf96; CALCA; EGR3; EPHA2; FILIP1L; GEM; GPM6B; GPRC5A; HOMER1; KLF11; MAFF; MBNL2; MCAM; MTHFD2; M…
RORA	45	1168	7.42574	0.969925	0.609579	1	0.831244	0.936893	CDC42BPA; ELMSAN1; GATA4; GATAD2A; GLIPR2; CREB5; MIDN; MNDA; NABP1; NFIL3; PIM1; PNRC1; PTPRE; S100A4; SGMS2; SORT1; TAGAP; TLR1; AUTS2; PREPL; ZNF385B; ALPK2; AFP; BTBD11; CSRNP3; DBI; DBP; JAKMIP2; LAMA4; LRIG3; RAPGEFL1; RORC; AKAP14; BACH2; CD274; IER3; IVNS1ABP; KCNK1; MAP3K8; MBNL2; NCOA7; PAPPA; PFKFB3; PHC2; PPAP2B;
YY1	36	1317	5.94059	0.688192	0.995312	1	1	1	ARRDC4; CDC42BPA; ENO3; FADS2; GPR27; HMGA1; LRRK2; PDE11A; PDE4B; PIM1; PPRC1; RASSF5; RNF19B; SP1; STC1; TLE3; TSLP; CBX5; COL1A2; HMBOX1; FLRT2; WNK3; ACSS2; CPB2; CSRNP3; FEZ1; GNAO1; HEXIM2; SAMD3; TBC1D2; AGPAT9; ARID5B; CIT; ERN1; IL6; SYN1;
ELK1	66	1986	10.8911	0.836573	0.953301	1	1	1	CDC42EP3; CXCL1; EFHD2; ERGIC1; FGR; FOSL2; GATAD2A; HMGA1; IL17RA; IL1R2; KCNJ15; LITAF; MAP2K3; LSP1; LST1; NABP1; NCF4; NFATC2; NRIP1; RAB20; RAC2; S100A8; SBNO2; SIN3A; TAGLN2; TIE1; TM6SF2; VASP; MEIS2; TIGD2; TRAM1; FOS; ANKS4B; GRAP; HIST1H1E; LAMA4; MYL6B; OGG1; RORC; SLC12A1; TBC1D2; TRHDE; ZGPAT; APOLD1; ATP2B4; C2CD4B; CALCA; EGR1; FOXO1; GADD45B; GPM6B; HBEGF; HOMER1; IVNS1ABP; JUN; K…
GABPA	67	2702	11.0561	0.624207	0.999999	1	1	1	AKAP12; CDC42EP3; CETP; CLPTM1; CSF3R; ELMSAN1; ENO3; EVI2B; FCER1G; FLT1; GATAD2A; HMGA1; IRF1; KCNJ15; LSP1; MIDN; PTPN1; PTPRE; R3HDM4; RAB5C; RAC2; SBNO2; SDC4; SERTAD1; SLC16A6; TGFB1; TM6SF2; TMEM71; HSP90B1; MCFD2; MEIS2; MTMR4; PREPL; TWF1; ACBD5; BTBD11; C19orf44; CENPQ; DBI; HEXIM2; OGG1; ORAI3; SEC14L3; TBC1D2; TRHDE; ALDH1A3; APOLD1; CALCA; EGR1; EPHA2; HAS2; HOMER1; IL4R; JUN; NR4A2;…
CTCF	126	2605	20.7921	1.21751	0.00877963	1	0.0558704	0.0629714	ADGRG3; AKAP12; ALDOA; ARHGAP30; ARRDC3; BBOX1; CELSR2; DTX4; ELMSAN1; ERGIC1; FADS2; FAM102B; FAM107A; FAM65B; FCAMR; FGR; FOSL2; GATAD2A; GLIPR2; HSD17B14; IL1R2; MAP2K3; CREB5; LRRK2; LSP1; LST1; MAP3K14; ZC3H12A; NCF2; PDE11A; PIM1; PLK2; PLXNC1; PPRC1; RAB26; RALGDS; RASSF5; S100A9; SELL; SERTAD1; SIN3A; SOCS3; SORT1; STAT3; TAGLN2; TGFB1; TLE3; TLR8; TRAF4; WNT11; COL1A2; MAF; MTMR4; TIGD2;…
FEV	36	526	5.94059	1.72308	0.00108255	0.227335	0.0108255	0.0122014	ARHGAP30; CLEC7A; FAM129A; FGR; FLT1; FOSL1; FOSL2; IL18RAP; ITPRIP; CREB5; NCF2; PDE4B; PTPRE; SBNO2; SELL; TMEM154; ZYX; TWF1; ZNF385B; AMOT; BTBD11; FAM13A; ADAMTS4; APOLD1; ARID5B; CYP27B1; ELF3; FILIP1L; HBEGF; NCOA7; NFKBIZ; NR4A3; PHC2; RUNX1; SRGN; VCAN;
HERPUD1	17	421	2.80528	1.01692	0.508109	1	0.767647	0.865214	C16orf54; F2RL1; FAM107A; FGR; IL1RN; PTPRE; RFX2; MANEA; MCFD2; CSRNP3; NOL4; OSGIN1; ATP2B4; NR4A2; PHC2; SOCS1; ZFYVE27;
KLF7	199	4448	32.8383	1.12612	0.0243778	1	0.116349	0.131137	ACVR2B; ALOX5; ANXA1; ARHGAP30; ARRDC4; BHLHE40; C10orf10; CD55; CDC42EP3; CELSR2; CLPTM1; CST7; CXCL1; ELMSAN1; EMP3; ENO3; F2RL1; FCAMR; FGR; FLT1; FOSL2; GATA4; GATAD2A; HCK; HIVEP1; HMGA1; HMOX1; IL17RA; ITPKC; JUND; KDM6B; KIAA0226L; KRT8; MAP2K3; CREB5; LSP1; MAP1LC3A; MAP3K14; METRNL; MIDN; SLC16A3; BCL3; MMP9; MXD1; MYADM; PDE11A; PLAUR; PLK2; PNRC1; PPP1R15A; PPP1R18; PTPN1; RAB11FIP1; R…
MAF	27	466	4.45545	1.45883	0.0323986	1	0.138851	0.156499	ALDOA; ELMSAN1; FGR; GATAD2A; ITPKC; KCNJ15; MMP9; PIM1; RASSF2; RIPK4; SLC16A6; ZNF217; CANX; COL1A2; CPD; NHSL1; BTBD11; FBXO2; RNF43; BACH2; EPHA2; ETS2; HSPB6; IL6; MYBPH; RBPMS; RUNX1;
NANOG	15	204	2.47525	1.85185	0.0163174	1	0.0926121	0.104383	ELMSAN1; FGR; FOSL1; HMGA1; NCF2; NFATC2; PTPRE; BACH2; BEND3; HBEGF; HOMER1; PPAN; RUNX1; TGFB3; TNIK;
NR5A1	61	1129	10.066	1.36013	0.00852322	1	0.0558704	0.0629714	ALDOA; CCR1; CETP; ELMSAN1; FAM129A; FAM65B; FGR; KCNJ15; CREB5; LPGAT1; MIDN; SLC16A3; NCF2; NFIL3; NRIP1; PDE11A; PLBD1; PNRC1; PTPRE; RNF19B; RPS6KA5; SLC16A6; SLC2A14; VASP; ZBTB43; AUTS2; MCFD2; SYT17; ZNF385B; CYP7A1; ABCG8; ACSS2; BTBD11; C9orf24; CCDC150; CD160; FAM13A; GRIA3; MB; OSGIN1; RORC; SHD; TBC1D2; ADAMTS4; CLCF1; F3; FSTL3; GAD2; KCNK1; LAMC2; LIMK2; MAP1B; NCOA7; PPAP2B; SEMA4B…
RFX1	96	2158	15.8416	1.1198	0.123596	1	0.305088	0.343864	AAED1; ALDOA; ANXA1; ARRDC4; C16orf54; C5AR1; CDC42BPA; CDC42EP3; EFHD2; ELMSAN1; FADS2; FAM107A; FAM65B; FASN; FGR; GATA4; GATAD2A; GLIPR2; KDM6B; MAP3K14; MID1IP1; MIDN; ZC3H12A; MNDA; MXD1; MYADM; NCF4; NRIP1; PDE4B; PLEK; PLXNC1; PPP1R15A; PTPN1; PTPRE; RFX2; SEC14L1; SLC11A1; TAGLN2; TLR8; TRAF4; AUTS2; CANX; CPD; HSP90B1; MANEA; MCFD2; PREPL; SEC63; SEPSECS; SYT17; WNK3; P4HA1; FOSB; ACBD5;…
RREB1	98	2136	16.1716	1.1549	0.0675755	1	0.208689	0.235213	BASP1; BBOX1; CCR1; CORO1A; CSF3R; EFHD2; ELMSAN1; EMP3; ERBB2; FADS2; FGR; FRAT2; IL18RAP; KCNJ15; KDM6B; CREB5; LSP1; PADI4; PDE4B; PIM1; PNRC1; RASSF5; RFX2; S100A4; S100A6; SLA; SLC16A6; SP1; STAT3; SYT12; TAGLN2; TIE1; TLE3; UBE2QL1; ZFP36L2; ZNF217; AUTS2; HMBOX1; MEIS2; ZNF385B; NCAM2; AMOT; BTBD11; C2orf82; DBP; FAM47E; FBXO2; GNAO1; LGI1; METRN; NOL4; ONECUT1; P2RY2; RAPGEFL1; RORC; SAMD…
SF1	61	1129	10.066	1.36013	0.00852322	1	0.0558704	0.0629714	ALDOA; CCR1; CETP; ELMSAN1; FAM129A; FAM65B; FGR; KCNJ15; CREB5; LPGAT1; MIDN; SLC16A3; NCF2; NFIL3; NRIP1; PDE11A; PLBD1; PNRC1; PTPRE; RNF19B; RPS6KA5; SLC16A6; SLC2A14; VASP; ZBTB43; AUTS2; MCFD2; SYT17; ZNF385B; CYP7A1; ABCG8; ACSS2; BTBD11; C9orf24; CCDC150; CD160; FAM13A; GRIA3; MB; OSGIN1; RORC; SHD; TBC1D2; ADAMTS4; CLCF1; F3; FSTL3; GAD2; KCNK1; LAMC2; LIMK2; MAP1B; NCOA7; PPAP2B; SEMA4B…
SP1	294	7140	48.5149	1.03643	0.20703	1	0.434763	0.490021	ACVR2B; ADSSL1; AKAP12; ALOX5; ARHGAP30; ARRDC4; BAZ1A; BHLHE40; C10orf10; CDC42EP3; CELSR2; COTL1; CXCL1; CXCL3; DHODH; DNMBP; DOK3; EFHD2; ELMSAN1; EMP3; ENO3; ERBB2; F2RL1; FADS2; FGR; FLT1; FOSL1; FOSL2; FRAT2; GATA4; GATAD2A; HIVEP1; HMGA1; IL17RA; IRF1; ITPKC; ITPRIP; JUND; KDM6B; KIAA0226L; KRT8; SOD2; MAP2K3; CREB5; LSP1; MAP1LC3A; MAP3K14; METRNL; MIDN; BCL3; MMP9; MPND; MXD1; MYADM; NRI…
SP4	186	4345	30.6931	1.07751	0.118974	1	0.30469	0.343416	ACVR2B; ADSSL1; ALDOA; ARRDC4; DTX4; ELMSAN1; EMP3; ENO3; ERBB2; F2RL1; FGR; FOSL1; GATA4; GATAD2A; HIVEP1; HMGA1; HSD17B14; ITPKC; KDM6B; KIAA0226L; MAP2K3; CREB5; MAP1LC3A; MAP3K14; MIDN; SLC16A3; MLXIP; MMP25; MXD1; MYADM; PDE11A; PLAUR; PLK2; PLXNC1; PNRC1; PPP1R18; PPRC1; PROK2; PTPN1; PTPRE; RAB20; RAB26; RALGDS; RASSF5; RELB; RIPK4; RNF19B; RPS6KA5; SBNO2; SERTAD1; SIN3A; SLC2A3; SP1; SPSB…
TCF3	118	2140	19.4719	1.38797	0.000100014	0.0210029	0.00161561	0.00182095	ACVR2B; AKAP12; ALDOA; ARRDC3; CD83; CDC42EP3; CELSR2; CSF3R; DGAT2; DTX4; ENO3; FGR; GATAD2A; GLIPR2; HMGA1; IRF1; KCNJ15; MAP2K3; CREB5; MID1IP1; MXD1; NFATC2; NRIP1; PADI4; PDE4B; PLXNC1; PROK2; RAB11FIP1; RAB26; RAB5C; SIGIRR; SIN3A; SOX17; SPSB1; STAT3; TMEM71; TRAF4; UBE2QL1; VASP; ZNF217; COL1A2; HMBOX1; MEIS2; NHSL1; SYT17; TRAM1; TSPAN8; ZNF385B; ZNF652; MYC; FOS; BTBD11; C11orf52; C9orf…
OTX1	31	848	5.11551	0.9204	0.71246	1	0.906767	1	CD83; FAM65B; G0S2; HMGA1; LRRK2; MID1IP1; MPEG1; SORT1; TNFAIP6; WNT11; CNTN3; FANCL; PCMTD1; ALPK2; AMOT; CSRNP3; GRIA3; HIST1H1E; NOL4; TPPP2; ARID5B; GPM6B; KCNK1; LIPN; MBNL2; NCOA7; NFKBIZ; PDLIM3; PRRX1; RPGR; RUNX1;
PITX1	31	848	5.11551	0.9204	0.71246	1	0.906767	1	CD83; FAM65B; G0S2; HMGA1; LRRK2; MID1IP1; MPEG1; SORT1; TNFAIP6; WNT11; CNTN3; FANCL; PCMTD1; ALPK2; AMOT; CSRNP3; GRIA3; HIST1H1E; NOL4; TPPP2; ARID5B; GPM6B; KCNK1; LIPN; MBNL2; NCOA7; NFKBIZ; PDLIM3; PRRX1; RPGR; RUNX1;
E2F1	47	1188	7.75578	0.995969	0.53515	1	0.789655	0.890019	ALDOA; AVPR1A; CD83; ELMSAN1; FOSL2; HMGA1; MIDN; PIM1; PTPN1; RPS6KA5; SBNO2; SGCE; SIN3A; SPSB1; UBE2QL1; ZFP36L2; ZNF217; CANX; CBX5; KLF3; MAF; MANEA; MCFD2; MEIS2; SYT17; TRAM1; MYC; AMOT; CD160; GINS2; HIST1H1E; LRIG3; APOLD1; ARID5B; BACH2; CDKN1A; GADD45G; IRS2; MAPK4; NCOA7; PHYHIPL; PRRX1; SOCS2; TGM2; TNIK; TUBB6; VCAN;
EGR1	149	3215	24.5875	1.16656	0.0186618	1	0.102403	0.115418	ACVR2B; AKAP12; ARRDC4; BCL2A1; BHLHE40; COTL1; ELMSAN1; ENO3; FOSL2; GATAD2A; HIVEP1; HMGA1; IRF1; JUND; KDM6B; KRT8; CREB5; LSP1; MAP1LC3A; MAP3K14; MIDN; MXD1; NABP1; PIM1; PIM3; PLAUR; PLK2; PLXNC1; PNRC1; PPP1R18; PPRC1; PTPRE; RAB5C; RALGDS; RASSF5; RELB; RFX2; RNF19B; RPS6KA5; SBNO2; SERTAD1; SGMS2; SIN3A; SLC25A37; SOCS3; SORT1; SOX17; SP1; STAT3; STC1; SYT12; TGFB1; TLE3; TRAF4; VASP; ZF…
NKX2-1	33	711	5.44554	1.16855	0.199103	1	0.431507	0.486351	ANXA1; CDC42EP3; GPR27; NABP1; NFATC2; NRIP1; PLK2; PPRC1; PRKCI; PROK2; RNF19B; SGCE; STAT3; TNFAIP6; AUTS2; COL1A2; TWF1; ZNF652; AGBL5; LGI1; PCDH18; TBC1D2; TEF; BACH2; DPPA3; GEM; KLF6; LEPR; MBNL2; NCOA7; OSMR; RRP12; SLC7A1;
NRF1	55	2037	9.07591	0.679711	0.999629	1	1	1	ALDOA; ARRDC3; BASP1; BAZ1A; CDC42BPA; CLPTM1; DHODH; FADS2; FASN; FOSL2; ITGB2; JUND; LMNB1; MAP3K14; PIM3; PNRC1; RALGDS; RIPK4; RNF19B; SEC14L1; SLC25A37; ZBTB21; ZBTB43; ZNF217; CBX5; FANCL; FLRT2; MANEA; SEPSECS; TIGD2; WNK3; ZNF385B; ZNF652; P4HA1; CLGN; DBI; KCNK5; KIF22; LRIG3; ONECUT1; TEF; ZFP1; CXCR4; ETS2; GRAMD4; NFKB2; NR4A2; PHC2; PHYHIPL; PVR; SPRY4; SYN1; THBS1; XRN2; ZFYVE27;
BACH1	49	648	8.08581	1.90361	1.15282e-05	0.00242092	0.000605231	0.000682155	ALDOA; ANXA1; ELMSAN1; EMP3; FOSL2; G0S2; GATAD2A; HMGA1; IL1RN; ITPKC; KRT8; LRRK2; BCL3; NABP1; PADI4; PIM1; PLAUR; PPP1R15A; PROK2; SERTAD1; SGMS2; SORT1; SPSB1; TAGLN2; TIMD4; TREM1; ZBTB43; MTMR4; AGBL5; ASCL2; BTBD11; CCDC150; SAMD3; ANXA2; ATF3; CIT; CSF3; ETS2; F3; FILIP1L; HBEGF; KLF4; KLF6; LAMC2; LIF; LYST; RGS2; SYN1; TNFRSF12A;
HOXB4	24	718	3.9604	0.841661	0.837411	1	0.966505	1	ALOX5AP; ANXA1; BAZ1A; ITPRIP; CREB5; PDE4B; AUTS2; COL1A2; PREPL; SEC63; TIGD2; TWF1; ALPK2; CCDC150; PCDH18; TEF; CHI3L1; CLCF1; GPM6B; MAP3K8; NR4A1; NRG1; PPAP2B; TNIK;
MEIS2	23	527	3.79538	1.09894	0.350935	1	0.606367	0.683435	AKAP12; BBOX1; CFP; PDE4B; PPP1R15A; RPS6KA5; TMEM71; ZBTB43; AUTS2; COL1A2; MAF; MEIS2; DBP; GRIA3; TEF; TRIM55; ARID5B; CYR61; FRMD6; MCAM; PHC2; PHYHIPL; THBS1;
NR4A2	43	1042	7.09571	1.0389	0.419961	1	0.66812	0.753037	BHLHE40; CASP7; CDC42EP3; ENO3; HAVCR2; IL1R2; KCNJ15; KIAA0226L; CREB5; MIDN; SLC16A3; NCF4; PIM3; RAB11FIP1; RNF19B; SLC16A6; SLC2A3; ZBTB43; SYT17; CD160; CPB2; CSRNP3; CYHR1; FAM13A; FMO1; GCK; GRIA3; MB; SHD; SLC25A34; ATF3; CIT; ERN1; FSTL3; GAD2; GFPT2; KCNK1; PHC2; PPAP2B; SEMA4B; SERPINA1; SIK1; SPRY4;
PPARA	18	370	2.9703	1.22511	0.220066	1	0.443378	0.499731	FAM65B; FOSL2; MAP2K3; CREB5; ZC3H12A; QPCT; SORT1; TRAF4; HMBOX1; MUM1; RTP3; FAM47E; LRIG3; SLC25A34; LIF; MBNL2; RUNX1; SPRY4;
PPARG	73	2016	12.0462	0.911518	0.823293	1	0.961055	1	ADGRG3; ALDOA; DOK3; ELMSAN1; ENO3; ERBB2; FAM65B; HSD17B14; ITPRIP; MAP2K3; CREB5; BCL3; MMP19; NCF4; NRIP1; PDE11A; PLIN1; PTPRE; SBNO2; SIGIRR; TAGLN2; TIE1; TIMD4; TRAF4; VASP; AUTS2; HMBOX1; MANEA; MUM1; RTP3; SEPSECS; ZNF385B; GDF15; C14orf80; CSRNP3; FAM13A; FAM47E; GCK; LRRC31; OGG1; PRKCZ; RMND1; RORC; SLC22A7; SLC25A34; TCAP; ACOT1; ADAMTS4; GPM6B; GRAMD4; HBEGF; HSPB6; IL1B; IVNS1ABP; …
HSF1	44	806	7.26073	1.37432	0.020162	1	0.10585	0.119304	AKAP12; ARRDC3; GATAD2A; HSPA6; IL1R2; CREB5; LPGAT1; LRRK2; MXD1; NCF2; NCF4; NFIL3; NRIP1; SPSB1; TSLP; CANX; MAF; MUM1; RTP3; SEC63; ZNF385B; FOSB; FOS; FAM13A; KBTBD3; KCNK5; SLC12A1; TPPP2; BEND3; C2orf66; EGR3; ETS2; FOXO1; HOMER1; IER5L; KLF5; MBNL2; NFKBIZ; NR4A3; NRG1; RASL10A; SIPA1L2; SIRPA; THBS1;
ETV7	38	1049	6.27063	0.911998	0.749381	1	0.921935	1	CHIC2; ELMSAN1; GATAD2A; HMGA1; IL1RN; IRF1; NABP1; RAC2; S100A11; SBNO2; SP1; TAGLN2; TIE1; TMEM71; ZNF217; CANX; HSP90B1; MTMR4; ZNF652; BTBD11; CENPQ; OGG1; SAMD3; SEC14L3; SLC12A1; ADAMTS4; CCL2; ETNK1; FCAR; HBEGF; JUNB; NCOA7; NR4A2; PPAN; RGS1; SRGN; TMPRSS2; TRIM15;
NR5A2	25	486	4.12541	1.29522	0.112771	1	0.299772	0.337873	CDC42EP3; ERGIC1; FAM65B; CREB5; MIDN; NFIL3; RPS6KA5; SLC2A14; VASP; AUTS2; CYP7A1; BTBD11; FAM13A; KANK4; NAGS; RORC; SAMD3; GFRA3; HOMER1; LIMK2; NRG1; PPAP2B; SIPA1L2; SRGN; URB2;
TEAD1	18	422	2.9703	1.07415	0.412601	1	0.666509	0.751221	CDC42EP3; DTX4; JUND; PRKCI; TRAF4; KANK4; SEC14L3; SIRT4; CLCF1; ELF3; EPHA2; LAMC2; PAPPA; PMP22; SPTBN1; TGFB3; THBS1; TNFRSF12A;
TFAP2A	19	258	3.13531	1.85448	0.00735704	1	0.0525012	0.059174	BHLHE40; KDM6B; CREB5; LST1; BCL3; PIM3; RELB; SLA; SP1; CLIC4; NCAM2; ADAMTS4; HBEGF; JUNB; KLF6; MAP1B; NR4A1; SPRY4; VCAN;
ARNT	16	403	2.64026	0.999888	0.537718	1	0.789655	0.890019	ACVR2B; ELMSAN1; PIM1; PPRC1; RALGDS; PTPRS; WNK3; FAM13A; LRIG3; SLC29A1; TMEM169; FGF14; GPM6B; KLF6; LIN28B; MAFF;
BARX1	25	382	4.12541	1.64784	0.0102142	1	0.0612851	0.0690744	CD55; EFHD2; IL1R2; CREB5; MXD1; NRIP1; STAT3; AUTS2; HMBOX1; MAF; MANEA; CCDC150; OSCP1; SAMD3; AGPAT9; ARG2; BACH2; IVNS1ABP; KCNK1; MSX1; OLR1; PHC2; RPGR; SIPA1L2; WT1;
BSX	16	268	2.64026	1.50354	0.0691499	1	0.210456	0.237205	CD55; CDC42EP3; KRT8; MXD1; PROK2; S100A4; HMBOX1; ACBD5; CSRNP3; HEXIM2; OSCP1; BACH2; MBNL2; MSX1; OLR1; SIPA1L2;
DMBX1	21	368	3.46535	1.43695	0.0617969	1	0.208035	0.234476	ANXA1; DTX4; ZC3H12A; MPEG1; PDE4B; S100A4; SGCE; TMED2; HIST1H1E; IFIT2; LGI1; RORC; SEC14L3; SLC12A1; ARID5B; MBNL2; PPAP2B; PRRX1; RPGR; RUNX1; SLC7A1;
GSC	13	379	2.14521	0.863977	0.745368	1	0.921935	1	KDM6B; MPEG1; QPCT; COL1A2; FANCL; SEC61A1; WNK3; MYL6B; SEC14L3; SLC12A1; CDH19; ETNK1; TEAD4;
HNF4A	148	3015	24.4224	1.2356	0.00238976	0.501851	0.0218196	0.0245928	ALDOA; BASP1; BHLHE40; CASP7; CDC42BPA; CDC42EP3; CELSR2; CETP; DGAT2; ELMSAN1; ENO3; ERBB2; FAM107A; FAM65B; FOSL2; G0S2; GATA4; GATAD2A; HSD17B14; IL18RAP; IL1R2; ITPRIP; KDM6B; MAP2K3; CREB5; LRRK2; LSP1; MIDN; ZC3H12A; MMP19; NCF4; NRIP1; PDE4B; PIM1; PKLR; PLEK; PRAP1; PROK2; QPCT; RAB5C; RALGDS; RASSF5; RNF19B; S100A4; SBNO2; SGCE; SIGIRR; TAGAP; TAGLN2; TGFB1; TIE1; TIMD4; TRAF4; TSLP; ZYX…
HOXA3	31	573	5.11551	1.36212	0.05068	1	0.183497	0.206819	CECR2; DTX4; EFHD2; CREB5; MID1IP1; NFIL3; NRIP1; PDE4B; PPRC1; SORT1; ZNF217; FANCL; LMAN1; SEC63; ZNF385B; MYC; ACBD5; AMOT; ASPM; BTBD11; HEXIM2; PCDH18; RNF43; GPM6B; HDC; LEPR; MBNL2; NR4A3; NRG1; PPAP2B; RAB27A;
HOXB3	13	335	2.14521	0.977452	0.574877	1	0.815708	0.919383	CDC42EP3; FAM65B; CREB5; LRRK2; COL1A2; MANEA; ZNF652; CSRNP3; OSCP1; RNF43; IVNS1ABP; KRT80; SIPA1L2;
HOXD8	39	811	6.43564	1.21067	0.124443	1	0.305088	0.343864	ALOX5AP; BAZ1A; CDC42BPA; CLEC4E; EVI2B; NCF2; PDE4B; PIM1; SGCE; TLE3; AUTS2; COL1A2; TSPAN8; TWF1; ZNF385B; ZNF652; ACSS2; AFP; DMRTA1; FAM13A; KRT222; LAMA4; LRRC19; PCDH18; SLC5A12; TRIM55; ALDH1A3; CHI3L1; CIT; ERN1; LYST; MAP3K8; MBNL2; NRG1; OLR1; PHYHIPL; RUNX1; SPTBN1; TNIK;
ONECUT1	20	564	3.30033	0.892968	0.732366	1	0.92094	1	CLEC4E; CREB5; PDE4B; PROK2; SELL; STAT3; COL1A2; SEC63; WNK3; ZNF385B; LRRC19; ARID5B; ETS2; IVNS1ABP; KLF5; LDLR; NR4A3; PRRX1; SIK1; SYNE2;
PAX7	20	467	3.30033	1.07844	0.397259	1	0.646701	0.728895	ANXA1; BAZ1A; CD55; CDC42EP3; DTX4; CREB5; ZNF217; AUTS2; FANCL; ZNF385B; ZNF652; GNAO1; LRIG3; OSCP1; PCDH18; ETNK1; FILIP1L; GPM6B; LIN28B; MAP3K8;
POU4F3	25	687	4.12541	0.916276	0.705064	1	0.906767	1	BAZ1A; CDC42BPA; CREB5; PDE4B; AUTS2; COL1A2; ZNF385B; ZNF652; CSRNP3; FEZ1; FMO1; LAMA4; SAMD3; ATF3; CIT; HDC; LEPR; LIMK2; LIN28B; NCOA7; PHYHIPL; RUNX1; SIPA1L2; SPTBN1; WT1;
PRRX2	24	597	3.9604	1.01225	0.506534	1	0.767647	0.865214	ANXA1; FAM129A; CREB5; MXD1; NABP1; SORT1; TLR1; COL1A2; FANCL; ZNF652; P4HA1; AGBL5; CCDC150; NOL4; OSCP1; PCDH18; GPM6B; HAS2; KCNK1; MBNL2; NR4A2; NRG1; RAB27A; SIPA1L2;
VAX2	14	434	2.31023	0.812483	0.823761	1	0.961055	1	ALOX5AP; BAZ1A; ELMSAN1; CREB5; SGMS2; TLE3; ZNF217; AUTS2; COL1A2; NCAM2; CCDC150; PCDH18; GPM6B; NRG1;
VSX2	28	595	4.62046	1.18485	0.20137	1	0.431507	0.486351	ANXA1; DTX4; ELMSAN1; HIVEP1; ITPRIP; NFIL3; NRIP1; QPCT; TLE3; UGCG; AUTS2; COL1A2; FANCL; SEC63; ZNF385B; ZNF652; MYC; AMOT; BTBD11; FRAT1; HEXIM2; PCDH18; RNF43; GPM6B; IVNS1ABP; OR1M1; RAB27A; SIPA1L2;
CUX1	20	350	3.30033	1.43894	0.0663732	1	0.208035	0.234476	ARRDC3; BAZ1A; PDE11A; PTPN1; QPCT; SGCE; ZNF217; KLF3; MEIS2; TSPAN8; ZNF385B; CSRNP3; ARID5B; CDH19; FILIP1L; NR4A2; NRG1; PRRX1; SLC7A1; TNFAIP8L3;
CACD	28	514	4.62046	1.37157	0.0569271	1	0.195979	0.220887	ANXA1; BASP1; ELMSAN1; FOSL1; ITPKC; PLXNC1; S100A6; SLC16A6; STAT3; TAGLN2; COL1A2; ACBD5; C9orf24; RORC; SEC14L3; SLC29A1; APOLD1; ARID5B; DPYSL3; EGR3; F3; LAMC2; LIMK2; MTHFD2; NR4A3; PMP22; RUNX1; TNIK;
HOXB13	21	526	3.46535	1.00533	0.523085	1	0.784627	0.884352	CD55; CREB5; SP1; TRAF4; COL1A2; FANCL; ZNF385B; MYC; CCDC150; JAKMIP2; TEF; ATP1B3; DEFB118; FGF14; GPM6B; MAP1B; NR4A3; PHC2; PMP22; PRRX1; TNIK;
ZNF238	41	799	6.76568	1.29185	0.0556254	1	0.194689	0.219434	ELMSAN1; EMP1; FOSL2; GATAD2A; IL1RN; JUND; LSP1; MMP19; NRIP1; PDE4B; PPRC1; PROK2; S100A4; SOCS3; SPSB1; TAGLN2; AUTS2; CLIC4; NT5E; ZNF385B; IGFBP1; AGBL5; BTBD11; MYL6B; OGG1; ONECUT1; SAMD3; SLC29A1; ALDH1A3; ARID5B; ATF3; FGF14; GFRA3; GRAMD4; KLF5; NR4A2; PPAP2B; PRRX1; RUNX1; TGFB3; TNFAIP8L3;
ZNF513	41	799	6.76568	1.29185	0.0556254	1	0.194689	0.219434	ELMSAN1; EMP1; FOSL2; GATAD2A; IL1RN; JUND; LSP1; MMP19; NRIP1; PDE4B; PPRC1; PROK2; S100A4; SOCS3; SPSB1; TAGLN2; AUTS2; CLIC4; NT5E; ZNF385B; IGFBP1; AGBL5; BTBD11; MYL6B; OGG1; ONECUT1; SAMD3; SLC29A1; ALDH1A3; ARID5B; ATF3; FGF14; GFRA3; GRAMD4; KLF5; NR4A2; PPAP2B; PRRX1; RUNX1; TGFB3; TNFAIP8L3;
MYC	50	1086	8.25083	1.15904	0.152948	1	0.355869	0.4011	ACVR2B; AKAP12; CELSR2; ELMSAN1; ENO3; HMOX1; CREB5; MAP1LC3A; MIDN; MXD1; NABP1; NFIL3; PIM1; PIM3; PPRC1; RND1; YBX3; COL1A2; PTPRS; SLC39A8; TIGD2; ZNF385B; FAM13A; LRIG3; RMND1; RORC; SLC29A1; TEF; TMEM169; TRIM55; ARG2; C17orf96; C2CD4A; EGR3; ELF3; FGF14; GADD45G; GEM; GPM6B; HBEGF; IRAK3; KCNE4; KLF4; LIN28B; NR4A1; NR4A2; PFKFB3; PHC2; URB2; XRN2;
MYF5	72	1856	11.8812	0.976536	0.606504	1	0.831244	0.936893	ACVR2B; AKAP12; ARRDC3; CDC42BPA; CDC42EP3; CSF3R; DTX4; ENO3; FAM129A; GPR27; HMGA1; ITPRIP; KRT8; MAP2K3; CREB5; MAP3K14; MLXIP; MYADM; NRIP1; PDE11A; PROK2; RAB26; RASSF2; SELL; SLA; STAT3; TRAF4; UGCG; VASP; AUTS2; CLIC4; COL1A2; HMBOX1; TSPAN8; MYC; AMOT; COQ10A; FEZ1; FMO1; GCK; GRAP; KCNK5; LAMA4; NINL; NOL4; OSCP1; PRKCZ; RBP5; RORC; SLC29A1; ATF3; CD274; CLCF1; CNN1; DPYSL3; EPHA2; FGF14…
FOXD1	19	334	3.13531	1.43251	0.0746556	1	0.214763	0.242059	FAM107A; MXD1; NRIP1; SGMS2; SIN3A; KLF3; TSPAN8; CYP7A1; GDF15; FAM13A; LRRC31; RNF43; ARID5B; CDKN1A; KLF4; MBNL2; NR4A1; PAPPA; TGFB3;
POU6F1	28	655	4.62046	1.07632	0.371477	1	0.623147	0.702349	CHIC2; FAM65B; HIVEP1; ITPRIP; KIAA0226L; CREB5; PDE4B; SGCE; SGMS2; SLC16A6; TAGLN2; TMEM154; WNT11; HSP90B1; SEC63; CSRNP3; NOL4; PCDH18; ARID5B; ATF3; KLF5; LIN28B; MAPK4; MBNL2; PHYHIPL; PRRX1; RUNX1; TACSTD2;
ASCL2	71	1499	11.7162	1.19231	0.0663305	1	0.208035	0.234476	ADRB2; ALOX5AP; AVPR1A; CCL4; CDC42BPA; CDC42EP3; CORO1A; DOK3; ELMSAN1; EMP1; ENO3; FOSL2; GLIPR2; IL1R2; KCNJ15; KIAA0226L; LAPTM5; CREB5; LSP1; MMP19; MMP9; NCF4; NRIP1; PADI4; PLEK; PPP1R18; PTPRE; SGCE; SOCS3; SORT1; STC1; TAGAP; TIE1; ZNF217; CLIC4; CNTN3; CPD; MTMR4; SEC63; TMED2; TRAM1; MYC; CCDC150; COQ10A; FAM13A; GRIA3; JAKMIP2; LAMA4; RAPGEFL1; SLC29A1; TBX3; TEF; ADAMTS1; ALDH1A3; AT…
BARHL1	19	509	3.13531	0.940008	0.643994	1	0.869544	0.980062	ANXA1; CREB5; S100A4; SGMS2; SORT1; SP1; TLE3; AUTS2; ZNF652; MYC; BTBD11; CSRNP3; KRT222; PCDH18; CLCF1; KLF5; NRG1; PHC2; TNIK;
ESRRA	41	917	6.76568	1.12562	0.235407	1	0.454017	0.511722	CLEC4E; ENO3; FAM129A; FCAMR; FCN1; HAVCR2; IL1R2; KCNJ15; CREB5; MIDN; SLC16A3; NCF2; NRIP1; PIM1; RNF19B; S100A4; VASP; AUTS2; CNTN3; SYT17; ZNF385B; ACSS2; AMOT; BTBD11; C9orf24; CSRNP3; CYHR1; FAM13A; GRIA3; MB; SHD; SLC12A1; AKAP14; CIT; KCNK1; LAMC2; NRG1; PAPPA; PMP22; PPAP2B; SLC7A1;
GBX1	6	199	0.990099	0.760108	0.807386	1	0.957915	1	NRIP1; SLC25A37; ZNF652; ALPK2; GNAO1; SIPA1L2;
GBX2	12	302	1.9802	1.00092	0.541665	1	0.789928	0.890327	DTX4; CREB5; FANCL; MANEA; MUM1; ZNF385B; ZNF652; GNAO1; OSCP1; NR4A2; RAB27A; SIPA1L2;
LHX4	19	392	3.13531	1.22056	0.216866	1	0.443378	0.499731	BBOX1; CD55; DTX4; SGMS2; TLE3; ZNF217; CBX5; ZNF652; CSRNP3; FAM13A; GNAO1; GRIA3; LRIG3; APOLD1; BACH2; FILIP1L; NR4A3; PHC2; RAB27A;
POU3F4	14	366	2.31023	0.963432	0.596688	1	0.82983	0.9353	ANXA1; BAZ1A; CREB5; SGCE; SPSB1; AUTS2; COL1A2; ACBD5; CDKN1A; GPM6B; HDC; LYST; RUNX1; WT1;
TCF12	57	1099	9.40594	1.30565	0.0228317	1	0.111503	0.125675	ELMSAN1; ERGIC1; GATAD2A; HIVEP1; ITPRIP; CREB5; MAMDC4; BCL3; MLXIP; MYADM; NCF2; RAB26; RASSF5; S100A4; S100A8; SGMS2; TAGLN2; TIE1; TRAF4; YBX3; ZNF217; GSTT1; FLRT2; MUM1; NHSL1; ACSS2; AGBL5; BTBD11; CDH15; COQ10A; GNAO1; KANK4; KRT222; LAMA4; NOL4; RAPGEFL1; RORC; SHD; TEF; ACTG2; ADAMTS4; CYP2F1; DPYSL3; GADD45G; GFPT2; HBEGF; KCNK1; KLF4; LIF; LIN28B; MYBPH; PMP22; PPAN; SERPINA1; SPRY4; …
ELF2	49	780	8.08581	1.58147	0.00100216	0.210454	0.0105227	0.0118601	ADRB2; CORO1A; ELMSAN1; EMP1; ERGIC1; FLT1; FOSL1; GATAD2A; HMGA1; IL1R2; IRF1; ITPKC; LAPTM5; MMP19; PADI4; QPCT; S100A9; SGMS2; SIN3A; SLC11A1; CANX; ZNF385B; ZNF652; BTBD11; C2orf54; DBP; GCK; GRIA3; SAMD3; SEC14L3; ADAMTS4; CCL2; EGR3; EPHA2; ETNK1; HBEGF; JUNB; LAMC2; LIMK2; MYH11; NCOA7; NR4A2; NRG1; PFKFB3; RBPMS; THBS1; TMPRSS2; TNIK; TUBB6;
ESR1	31	696	5.11551	1.1214	0.279437	1	0.514752	0.580176	ADSSL1; BHLHE40; CDC42EP3; CELSR2; CORO1A; ELMSAN1; GPR27; KIAA0226L; NRIP1; SLC16A6; SORT1; TM6SF2; TNFAIP6; ZYX; ZNF652; FAM13A; FBXO2; METRN; PCDH18; ADAMTS4; FSTL3; GAD2; GADD45G; MCAM; NFKB2; NR4A1; PMP22; SPRY4; THBS1; TNFAIP8L3; TNFRSF12A;
FOS	101	1754	16.6667	1.44947	6.92671e-05	0.0145461	0.00121217	0.00136624	ALDOA; ANXA1; ARRDC4; COTL1; DNMBP; ELMSAN1; EMP3; ENO3; ERGIC1; EVI2B; FAM65B; FOSL1; G0S2; GATAD2A; IL1R2; IL1RN; ITPKC; KCNJ15; KDM6B; KRT8; MAP2K3; CREB5; LSP1; MAP3K14; MIDN; ZC3H12A; BCL3; MMP19; MXD1; NABP1; PADI4; PIM1; PLAUR; PPP1R15A; PPP1R18; PPP3R1; PTPRE; QPCT; RIPK4; RND1; S100A11; SPSB1; TMEM154; TNFAIP6; TPSAB1; TRAF4; TSLP; VASP; YBX3; ZNF217; ZYX; COL1A2; FLRT2; TMEM50B; ZNF385B…
FOSB	101	1754	16.6667	1.44947	6.92671e-05	0.0145461	0.00121217	0.00136624	ALDOA; ANXA1; ARRDC4; COTL1; DNMBP; ELMSAN1; EMP3; ENO3; ERGIC1; EVI2B; FAM65B; FOSL1; G0S2; GATAD2A; IL1R2; IL1RN; ITPKC; KCNJ15; KDM6B; KRT8; MAP2K3; CREB5; LSP1; MAP3K14; MIDN; ZC3H12A; BCL3; MMP19; MXD1; NABP1; PADI4; PIM1; PLAUR; PPP1R15A; PPP1R18; PPP3R1; PTPRE; QPCT; RIPK4; RND1; S100A11; SPSB1; TMEM154; TNFAIP6; TPSAB1; TRAF4; TSLP; VASP; YBX3; ZNF217; ZYX; COL1A2; FLRT2; TMEM50B; ZNF385B…
JUN	101	1754	16.6667	1.44947	6.92671e-05	0.0145461	0.00121217	0.00136624	ALDOA; ANXA1; ARRDC4; COTL1; DNMBP; ELMSAN1; EMP3; ENO3; ERGIC1; EVI2B; FAM65B; FOSL1; G0S2; GATAD2A; IL1R2; IL1RN; ITPKC; KCNJ15; KDM6B; KRT8; MAP2K3; CREB5; LSP1; MAP3K14; MIDN; ZC3H12A; BCL3; MMP19; MXD1; NABP1; PADI4; PIM1; PLAUR; PPP1R15A; PPP1R18; PPP3R1; PTPRE; QPCT; RIPK4; RND1; S100A11; SPSB1; TMEM154; TNFAIP6; TPSAB1; TRAF4; TSLP; VASP; YBX3; ZNF217; ZYX; COL1A2; FLRT2; TMEM50B; ZNF385B…
JUNB	101	1754	16.6667	1.44947	6.92671e-05	0.0145461	0.00121217	0.00136624	ALDOA; ANXA1; ARRDC4; COTL1; DNMBP; ELMSAN1; EMP3; ENO3; ERGIC1; EVI2B; FAM65B; FOSL1; G0S2; GATAD2A; IL1R2; IL1RN; ITPKC; KCNJ15; KDM6B; KRT8; MAP2K3; CREB5; LSP1; MAP3K14; MIDN; ZC3H12A; BCL3; MMP19; MXD1; NABP1; PADI4; PIM1; PLAUR; PPP1R15A; PPP1R18; PPP3R1; PTPRE; QPCT; RIPK4; RND1; S100A11; SPSB1; TMEM154; TNFAIP6; TPSAB1; TRAF4; TSLP; VASP; YBX3; ZNF217; ZYX; COL1A2; FLRT2; TMEM50B; ZNF385B…
JUND	101	1754	16.6667	1.44947	6.92671e-05	0.0145461	0.00121217	0.00136624	ALDOA; ANXA1; ARRDC4; COTL1; DNMBP; ELMSAN1; EMP3; ENO3; ERGIC1; EVI2B; FAM65B; FOSL1; G0S2; GATAD2A; IL1R2; IL1RN; ITPKC; KCNJ15; KDM6B; KRT8; MAP2K3; CREB5; LSP1; MAP3K14; MIDN; ZC3H12A; BCL3; MMP19; MXD1; NABP1; PADI4; PIM1; PLAUR; PPP1R15A; PPP1R18; PPP3R1; PTPRE; QPCT; RIPK4; RND1; S100A11; SPSB1; TMEM154; TNFAIP6; TPSAB1; TRAF4; TSLP; VASP; YBX3; ZNF217; ZYX; COL1A2; FLRT2; TMEM50B; ZNF385B…
NR6A1	41	769	6.76568	1.34225	0.0338108	1	0.142006	0.160054	BASP1; CETP; CLEC4E; EVI2B; FLT1; GPR27; IL18RAP; CREB5; LRRK2; MAP1LC3A; MIDN; NCF2; NFIL3; PDE11A; PDE4B; PTPRE; RASSF5; RELB; RPS6KA5; SORT1; SPSB1; AUTS2; MTMR4; NHSL1; AFP; BTBD11; C11orf52; CLGN; ONECUT1; RNF43; RORC; SHD; BEND3; FOXO1; IL1RL1; IL2RA; JUN; LAMC2; MBNL2; NFE2; SERPINA1;
RAB40B	28	806	4.62046	0.874678	0.79692	1	0.956303	1	DNMBP; ENO3; ERBB2; ERGIC1; GATA4; MAP2K3; NCF4; PIM1; TRAF4; TSLP; AUTS2; CNTN3; CSRNP3; FAM13A; GCK; GPAM; JAKMIP2; OSCP1; PRKCZ; SLC22A7; SLC25A34; CD274; ERN1; GFPT2; KCNK1; NRG1; SERPINA1; SPRY4;
RARA	28	806	4.62046	0.874678	0.79692	1	0.956303	1	DNMBP; ENO3; ERBB2; ERGIC1; GATA4; MAP2K3; NCF4; PIM1; TRAF4; TSLP; AUTS2; CNTN3; CSRNP3; FAM13A; GCK; GPAM; JAKMIP2; OSCP1; PRKCZ; SLC22A7; SLC25A34; CD274; ERN1; GFPT2; KCNK1; NRG1; SERPINA1; SPRY4;
SPI1	40	814	6.60066	1.23713	0.0960334	1	0.261909	0.295197	ALOX5AP; BCL2A1; BIRC3; C16orf54; CORO1A; CSF3R; ELMSAN1; EMP1; EVI2B; FAM129A; HAVCR2; IL1R2; IRF1; KCNJ15; MAP2K3; CREB5; LPGAT1; LSP1; LST1; SLC16A3; MPEG1; MYADM; NCF1; NCF4; PLEK; PTPRE; QPCT; RAB5C; RASSF2; S100A6; SBNO2; VASP; LGALS4; CDKN1A; MAFF; MBNL2; MYH11; NR4A3; PPAP2B; SIPA1L2;
BARX2	15	296	2.47525	1.27629	0.200775	1	0.431507	0.486351	ANXA1; BAZ1A; CREB5; ZNF217; AUTS2; COL1A2; ZNF385B; ZNF652; CSRNP3; PCDH18; SAMD3; OLR1; TACSTD2; TNIK; WT1;
DBX2	14	408	2.31023	0.864257	0.750719	1	0.921935	1	BAZ1A; CD55; CDC42BPA; CREB5; SGCE; TLE3; COL1A2; MAF; ZNF652; CSRNP3; CEBPD; RUNX1; TNIK; WT1;
EN1	24	466	3.9604	1.2968	0.117189	1	0.303822	0.342437	ANXA1; CECR2; CXCR2; CREB5; SLC25A37; ZNF217; AUTS2; COL1A2; NCAM2; ALPK2; ACSS2; BTBD11; CSRNP3; KRT222; NOL4; PCDH18; FILIP1L; GPM6B; HDC; KLF5; LYST; MAP3K8; RUNX1; TNIK;
FOXC1	13	301	2.14521	1.08786	0.4191	1	0.66812	0.753037	FOSL2; NRIP1; RIPK4; SLC16A6; TMEM71; HSP90B1; FAM13A; GNAO1; HOPX; ARID5B; MAFF; PAPPA; RUNX1;
HOXA5	32	916	5.28053	0.879551	0.801656	1	0.956521	1	ARRDC3; BASP1; CDC42BPA; CDC42EP3; FAM107A; FLT1; LMNB1; CREB5; NRIP1; RASSF5; SGCE; AUTS2; FANCL; HMBOX1; NHSL1; RAP1GDS1; ACBD5; BTBD11; CSRNP3; ENHO; HEXIM2; PCDH18; TEF; BACH2; CACNG2; FILIP1L; GPM6B; KLF5; KLF6; MBNL2; PHC2; PRRX1;
HOXA7	24	527	3.9604	1.1467	0.273252	1	0.512348	0.577466	ALOX5AP; ANXA1; BAZ1A; ELMSAN1; PDE4B; QPCT; AUTS2; COL1A2; PREPL; SEC63; TSPAN8; TWF1; AFP; BTBD11; FRAT1; CHI3L1; ETNK1; GPM6B; KLF6; LYST; NR4A1; PPAP2B; PRRX1; RUNX1;
HOXB6	11	123	1.81518	2.2528	0.0098476	1	0.0608234	0.068554	ALOX5AP; BASP1; CDC42EP3; CREB5; SGCE; AUTS2; FOSB; HEXIM2; NOL4; BACH2; GRHL1;
HOXB7	18	388	2.9703	1.16828	0.282434	1	0.515749	0.581299	ALOX5AP; BAZ1A; SLC16A6; STAT3; AUTS2; COL1A2; TWF1; AFP; NOL4; SAMD3; CACNG2; CHI3L1; ETS2; HDC; NRG1; SPTBN1; TNIK; WT1;
HOXB8	8	225	1.32013	0.895997	0.675318	1	0.886355	0.999009	BAZ1A; CREB5; S100A4; COL1A2; NCAM2; PCDH18; NCOA7; WT1;
HOXC6	8	237	1.32013	0.850632	0.729721	1	0.92094	1	BAZ1A; STAT3; AUTS2; COL1A2; ACBD5; KRT222; MBNL2; WT1;
ISX	16	265	2.64026	1.52056	0.0638958	1	0.208035	0.234476	CDC42EP3; DTX4; HMGA1; NRIP1; PPRC1; ZNF217; CBX5; FANCL; LMAN1; MUM1; SYT17; ZNF652; GNAO1; LRIG3; OSCP1; NR4A2;
LHX8	7	223	1.15512	0.791169	0.787658	1	0.956117	1	ZNF217; ZNF652; GNAO1; GRIA3; LRIG3; PHC2; RAB27A;
MNX1	18	311	2.9703	1.45752	0.0714286	1	0.211268	0.238119	BAZ1A; CFP; DTX4; ELMSAN1; RASSF5; SGMS2; SLC25A37; STAT3; COL1A2; FANCL; MUM1; CLGN; GNAO1; LAMA4; CACNG2; KLF6; SPTBN1; WT1;
MSX1	12	234	1.9802	1.29177	0.221689	1	0.443378	0.499731	BAZ1A; CREB5; TLE3; ZNF217; AUTS2; COL1A2; PCDH18; EGR1; GPM6B; KLF5; NRG1; TNIK;
NKX1-1	2	146	0.330033	0.346489	0.981456	1	1	1	S100A4; COL1A2;
PAX6	26	557	4.29043	1.17531	0.223872	1	0.44352	0.499891	ANXA1; BAZ1A; CDC42BPA; CDC42EP3; CXCR2; FAM65B; HMGA1; CREB5; MPEG1; NRIP1; PTPRE; QPCT; SGCE; SLC25A37; WNT11; COL1A2; ZNF652; OSCP1; PCDH18; TEF; FGF14; HOMER1; LYST; MBNL2; NCOA7; NRG1;
PBX1	35	741	5.77558	1.18917	0.164057	1	0.374478	0.422074	CDC42BPA; HMGA1; LMNB1; CREB5; NABP1; PDE4B; RASSF2; RPS6KA5; ZNF217; COL1A2; MEIS2; NHSL1; WNK3; ZNF385B; NCAM2; ALPK2; CCDC150; GNAO1; GRIA3; HIST1H1A; KRT222; LRIG3; RBP5; BACH2; CD274; KLF4; LIF; LIPN; MAPK4; MBNL2; NR4A2; NR4A3; PAPPA; SIPA1L2; SPTBN1;
PKNOX1	7	95	1.15512	1.85705	0.083698	1	0.236737	0.266826	NABP1; NHSL1; GNAO1; RBP5; BACH2; CD274; SPTBN1;
POU5F1	18	373	2.9703	1.21526	0.230013	1	0.451428	0.508804	ADRB2; DNMBP; PDE4B; SLA; TNFAIP6; NHSL1; ZNF385B; CSRNP3; GRIA3; LAMA4; LRIG3; ONECUT1; ARID5B; DPYSL3; GADD45G; KLF5; MAP3K8; SYNE2;
PRRX1	23	389	3.79538	1.48878	0.037769	1	0.152529	0.171915	ANXA1; CDC42BPA; CECR2; EFHD2; FAM65B; ITPRIP; LMNB1; CREB5; NFIL3; AUTS2; COL1A2; FANCL; ZNF385B; ZNF652; ACBD5; AMOT; NOL4; OSCP1; PCDH18; GPM6B; KLF5; MAP3K8; RAB27A;
REST	26	765	4.29043	0.855754	0.822901	1	0.961055	1	ALDOA; ALOX5; CDC42EP3; DNMBP; IL17RA; ITPKC; NRIP1; RALGDS; SGMS2; SIN3A; AUTS2; BTBD11; HOPX; PCDH18; ARID5B; ARL14; BACH2; EGR3; GAD2; MAP1B; NR4A1; NR4A2; OSMR; PHYHIPL; SPRY4; SYN1;
SOX1	16	276	2.64026	1.45996	0.0845489	1	0.236737	0.266826	ADRB2; ARRDC3; BASP1; BAZ1A; MXD1; STC1; FRAT1; GNAO1; LRIG3; ARID5B; CYR61; GADD45G; LIN28B; MAP1B; NR4A1; SYNE2;
TGIF1	33	1034	5.44554	0.80352	0.925097	1	1	1	ARRDC4; BBOX1; CFP; FAM107A; FAM65B; LSP1; NRIP1; PDE4B; PIM1; PRKCI; SGMS2; TLE3; AUTS2; MAF; MEIS2; ALPK2; ACSS2; CSRNP3; DBP; FMO1; GRIA3; SLC12A1; SLC29A1; TRIM55; C17orf96; CCL20; CIT; GFRA3; MBNL2; NAMPT; NCOA7; PHC2; PHYHIPL;
CRX	22	349	3.63036	1.5873	0.0224938	1	0.111503	0.125675	AKAP12; IRF1; KDM6B; PLXNC1; TLE3; VASP; ZNF217; AUTS2; TIGD2; ZNF385B; GNAO1; LGI1; OSCP1; TRHDE; CDH19; CLCF1; CYP27B1; EPHA2; ETS2; LIN28B; PHC2; RPGR;
ESR2	21	464	3.46535	1.13966	0.299953	1	0.543019	0.612036	KIAA0226L; METRNL; NRIP1; RALGDS; SLC16A6; SORT1; MTMR4; ZNF652; ACSS2; FAM13A; GPAM; KANK4; FSTL3; LAMC2; NFKB2; NR4A3; PMP22; PPAP2B; SPRY4; SPTBN1; TNFAIP8L3;
GLI1	7	148	1.15512	1.19207	0.373888	1	0.623147	0.702349	ERBB2; PIM1; SLA; TGFB1; GNAO1; ADAMTS1; ZFYVE27;
HENMT1	58	1144	9.57096	1.27629	0.0321986	1	0.138851	0.156499	ADRB2; CD93; CDC42EP3; CELSR2; CFP; CXCR2; DOK3; ELMSAN1; EMP1; EMP3; FAM107A; FAM129A; FCAMR; FOSL2; LSP1; METRNL; BCL3; NRIP1; PTPRE; RAB26; SIGIRR; SORT1; STAT3; TAGLN2; TIE1; TRAF4; UBE2QL1; CLIC4; CNTN3; CPD; MTMR4; NHSL1; PTPRS; ZNF652; MYC; AMOT; CCDC150; CSRNP3; FAM13A; GRAP; GRIA3; PRKCZ; RBP5; RORC; SLC29A1; TBX3; TEF; ALDH1A3; CCL2; DPYSL3; FILIP1L; IER5L; LIF; MCAM; NR4A2; NR4A3; OSMR…
INSM1	19	487	3.13531	0.982472	0.566335	1	0.815708	0.919383	BBOX1; ERGIC1; LAPTM5; MXD1; PKLR; SGCE; SIGIRR; TIE1; TRAF4; CLIC4; COL1A2; HMBOX1; NAGS; NOL4; CIT; HSPB6; LIN28B; NR4A3; TNFRSF12A;
NHLH1	58	1144	9.57096	1.27629	0.0321986	1	0.138851	0.156499	ADRB2; CD93; CDC42EP3; CELSR2; CFP; CXCR2; DOK3; ELMSAN1; EMP1; EMP3; FAM107A; FAM129A; FCAMR; FOSL2; LSP1; METRNL; BCL3; NRIP1; PTPRE; RAB26; SIGIRR; SORT1; STAT3; TAGLN2; TIE1; TRAF4; UBE2QL1; CLIC4; CNTN3; CPD; MTMR4; NHSL1; PTPRS; ZNF652; MYC; AMOT; CCDC150; CSRNP3; FAM13A; GRAP; GRIA3; PRKCZ; RBP5; RORC; SLC29A1; TBX3; TEF; ALDH1A3; CCL2; DPYSL3; FILIP1L; IER5L; LIF; MCAM; NR4A2; NR4A3; OSMR…
NR1H4	5	62	0.825083	2.03354	0.0994447	1	0.267736	0.301764	BHLHE40; GATA4; PDE4B; MEIS2; GRIA3;
ZEB1	28	401	4.62046	1.75806	0.00282133	0.59248	0.0246867	0.0278243	BBOX1; ELMSAN1; ERGIC1; PDE11A; RIPK4; SLC16A6; TMEM71; HSP90B1; MTMR4; CHRNB1; ENHO; FEZ1; RORC; TBC1D2; TRHDE; CACNG2; CXCR4; EGR3; GADD45B; GPM6B; JUN; MAPK4; NFE2; NR4A2; PHC2; SIPA1L2; SPTBN1; THBS1;
ZFP161	53	1137	8.74587	1.17346	0.124941	1	0.305088	0.343864	ADRB2; BHLHE40; ERBB2; FADS2; FAM65B; FOSL2; HMGA1; ITPRIP; LMNB1; RALGDS; RIPK4; RPS6KA5; SIN3A; SLC16A6; SLC25A37; SOCS3; TLE3; ZFP36L2; ZNF217; AUTS2; CANX; MANEA; MUM1; PTPRS; TIGD2; WNK3; FOS; ASPM; LRIG3; NOL4; TBX3; TMEM98; ADAMTS1; BACH2; CIT; DPYSL3; EGR1; EGR3; EPHA2; ETS2; GAD2; GADD45B; GFRA3; GRHL1; JUN; KLF4; MTHFD2; NRG1; PFKFB3; PHYHIPL; SPTBN1; TNIK; ZFP36;
BACH2	43	628	7.09571	1.72377	0.000362683	0.0761635	0.00476022	0.00536523	EMP3; ERGIC1; G0S2; GATAD2A; HMGA1; ITPKC; MAP2K3; MIDN; MYADM; PADI4; PIM1; PLAUR; PROK2; RIPK4; SERTAD1; SPSB1; TAGLN2; TIMD4; VASP; ZBTB43; MTMR4; ASCL2; BTBD11; CCDC150; OSGIN1; SAMD3; AGPAT9; ANXA2; ATF3; CDKN1A; F3; GADD45B; GRAMD4; HBEGF; KLF4; KLF6; LAMC2; LIF; MAP3K8; NR4A3; PVR; SERPINA1; TNFRSF12A;
EBF1	12	205	1.9802	1.4745	0.116745	1	0.303822	0.342437	ELMSAN1; FLT1; BCL3; PLIN1; ACSS2; CD160; PRKCZ; ARL14; CYR61; EGR1; LIMK2; MAP1B;
HOXA13	9	309	1.48515	0.733885	0.869968	1	0.992733	1	CREB5; LPGAT1; TSLP; ZNF385B; LRRC19; APOLD1; MAP3K8; NR4A3; RGS1;
MSX2	15	344	2.47525	1.09821	0.393126	1	0.644972	0.726947	IL1R2; NRIP1; SLC25A37; TLE3; AUTS2; MANEA; ZNF385B; ZNF652; AMOT; APOLD1; BEND3; GPM6B; PRRX1; RAB27A; RPGR;
NOBOX	23	621	3.79538	0.932597	0.667047	1	0.881005	0.99298	ANXA1; AVPR1A; CECR2; DTX4; FAM65B; CREB5; NABP1; RASSF5; ZNF385B; NCAM2; BTBD11; LAMA4; LRIG3; OSCP1; PCDH18; RNF43; APOLD1; CLCF1; CXCR4; GPM6B; HOMER1; KLF5; NRG1;
TFAP4	70	1280	11.5512	1.37665	0.00371585	0.780328	0.0304737	0.0343468	ADRB2; ALDOA; CDC42EP3; ELMSAN1; FAM65B; FCAMR; FOSL2; FPR1; GATAD2A; GLIPR2; MLXIP; MMP9; NCF4; NFATC2; NRIP1; PDE11A; RAB5C; RAC2; RASSF5; S100A4; S100A8; SIN3A; STAT3; STC1; TAGLN2; TRAF4; ZNF217; HSP90B1; MUM1; SYT17; TSPAN8; ZNF385B; ZNF652; MYC; AGBL5; BTBD11; COQ10A; CSRNP3; DMRTA1; GNAO1; LAMA4; MYL6B; NINL; NOL4; RAPGEFL1; RNF43; RORC; SEC14L3; SHD; TEF; ADAMTS4; ATF3; BACH2; CACNG2; ELF…
ATF3	58	800	9.57096	1.82509	6.44984e-06	0.00135447	0.000451489	0.000508872	CCL4; ELMSAN1; ERGIC1; FLT1; FOSL2; HIVEP1; ITPRIP; KCNJ15; CREB5; MAP1LC3A; MXD1; PNRC1; RELB; SLC25A37; SORT1; STAT3; TLE3; TPSAB1; TRAF4; ZBTB21; NT5E; PTPRS; FOSB; FOS; FAM13A; MB; NOL4; PRKCZ; RBP5; RNF43; SEC14L3; SPHK2; ARG2; ATP1B3; BACH2; BTG2; CDKN1A; CHSY3; EPHA2; GEM; GFRA3; GPM6B; HOMER1; JUN; KLF11; KLF6; MAFF; MBNL2; MCAM; ODF3L1; PDLIM3; RBPMS; RGS2; SPTBN1; SYN1; TAGLN; TGFB3; ZF…
TAL1	45	1113	7.42574	1.01785	0.473846	1	0.737094	0.830777	CDC42EP3; CXCR2; DTX4; ERGIC1; FAM65B; GATAD2A; KDM6B; KIAA0226L; CREB5; MXD1; PDE4B; RAB5C; S100A4; SLA; TAGAP; TRAF4; TSLP; SEC61A1; ANXA9; CLGN; CSRNP3; GPAM; LAMA4; MB; MOGAT1; RNF43; SHD; SLC25A34; SPHK2; BACH2; DPYSL3; EPHA2; FGF14; GEM; HSPB6; IVNS1ABP; JUN; KLF5; KLF6; KRT80; LAMC2; LIF; MYBPH; RUNX1; SPRY4;
HOXA9	26	729	4.29043	0.898013	0.744745	1	0.921935	1	ANXA1; CREB5; SGCE; SOX17; STC1; COL1A2; FANCL; PCMTD1; ZNF385B; NCAM2; ACSS2; CCDC150; LGI1; GAD2; IL1B; JUN; KLF5; LYST; MBNL2; NCOA7; NR4A3; NRG1; PAPPA; PHYHIPL; PTGS2; TNIK;
NFE2	41	518	6.76568	1.99263	2.13338e-05	0.0044801	0.000854562	0.000963175	ALDOA; ARRDC4; COTL1; DNMBP; ELMSAN1; FAM65B; FOSL2; MAP2K3; CREB5; MIDN; ZC3H12A; MMP9; NABP1; NFATC2; PADI4; PPRC1; PTPRE; SELL; SORT1; VASP; FLRT2; NHSL1; WNK3; BTBD11; CCDC150; CCL14; OSGIN1; PRKCZ; ATF3; CLCF1; DPYSL3; ETS2; FGF14; FILIP1L; GEM; IL15RA; IL6; KLF6; NCOA7; PRRX1; SYN1;
RUNX1	2	37	0.330033	1.36695	0.43548	1	0.6876	0.774993	MBNL2; NR4A2;
LMO2	40	610	6.60066	1.65085	0.00131705	0.27658	0.0125718	0.0141697	FOSL1; FOSL2; GATAD2A; KDM6B; MYADM; PADI4; RASSF2; SOCS3; SOX17; SOX7; TAGLN2; WNT11; ZBTB21; ZNF217; HSP90B1; MTMR4; TRAM1; COQ10A; CSRNP3; JAKMIP2; MOGAT2; NOL4; RORC; TBX3; TEF; ATP2B4; EPHA2; FOXO1; GADD45G; HBEGF; HOMER1; IER5L; NFE2; NR4A1; NR4A2; RUNX1; SPTBN1; TGFB3; TRIM15; ZFP36;
RUNX2	21	315	3.46535	1.67872	0.0145892	1	0.0851037	0.0959203	ELMSAN1; CREB5; PIM1; PTPN1; RASSF2; SLC16A6; SLC2A3; SORT1; TAGAP; TNFAIP6; MEIS2; NHSL1; ZNF385B; CSRNP3; RNF43; RORC; ARID5B; CYR61; LIF; MCAM; RUNX1;
GATA1	37	728	6.10561	1.27955	0.0740599	1	0.214763	0.242059	BASP1; CDC42EP3; ELMSAN1; GATA4; CREB5; MAMDC4; MIDN; NRIP1; PKLR; PLXNC1; PTPRE; TLE3; ZNF217; CSRNP3; FMO1; GRIA3; LAMA4; LRIG3; MOGAT2; SAMD3; CACNG2; CDKN1A; CEBPD; EPHA2; GAD2; GADD45G; HOMER1; IL1RL1; JUN; MAP3K8; NFE2; NR4A2; PHC2; PNLIP; RBPMS; RUNX1; TEAD4;
FOXD3	18	361	2.9703	1.25565	0.191448	1	0.4232	0.476989	CREB5; SLC16A6; KLF3; SLC39A8; TSPAN8; ZNF385B; CYP7A1; C11orf52; RNF43; FGF14; HAS2; KLF5; MBNL2; MYOM1; NR4A1; RUNX1; SLC7A1; TNFAIP8L3;
ISL2	20	515	3.30033	0.977929	0.57488	1	0.815708	0.919383	ANXA1; BAZ1A; CD55; CDC42BPA; CREB5; ZNF217; AUTS2; COL1A2; NCAM2; ACBD5; CSRNP3; TEF; ETS2; KLF5; MAP3K8; NCOA7; NR4A2; PRRX1; RUNX1; THBS1;
ZNF143	20	618	3.30033	0.814943	0.857242	1	0.98372	1	GATAD2A; IL1RN; KRT8; PIM1; PRKCI; VASP; HSP90B1; PAH; MEIS2; ABCG8; ACBD5; CSRNP3; HEXIM2; HBEGF; MBNL2; NR4A1; PAPPA; PPAP2B; SPTBN1; THBD;
CDX2	12	253	1.9802	1.19476	0.305912	1	0.548556	0.618277	CREB5; STC1; TSPAN8; ACSS2; CSRNP3; ARID5B; DEFB118; GAD2; MAP1B; MYH11; SIRPA; THBS1;
FOXK1	7	121	1.15512	1.45805	0.206087	1	0.434763	0.490021	NRIP1; CSRNP3; ARID5B; MBNL2; NR4A2; PDLIM3; TGFB3;
FOXO1	11	192	1.81518	1.44324	0.143294	1	0.33811	0.381083	AKAP12; NRIP1; PLXNC1; NCAM2; FAM13A; PCDH18; ARID5B; FOXO1; MAFF; NR4A2; TGFB3;
GFI1	20	552	3.30033	0.91238	0.697322	1	0.903936	1	DHODH; CREB5; PDE11A; S100A4; SGCE; SLC16A6; AUTS2; COL1A2; MAF; MTMR4; TSPAN8; CSRNP3; KRT222; LRIG3; RNF43; DPYSL3; IL1B; IRAK3; KLF5; OLR1;
HMX1	10	240	1.65017	1.04974	0.484667	1	0.74292	0.837344	NRIP1; S100A4; WNT11; MEIS2; HEXIM2; PCDH18; FOXO1; NRG1; PRRX1; WT1;
HOXB9	20	537	3.30033	0.937865	0.650088	1	0.869544	0.980062	RIPK4; AUTS2; COL1A2; MEIS2; ACSS2; CCDC150; CSRNP3; LGALS4; SLC12A1; ARID5B; DEFB118; GAD2; IL1B; IL1RL1; JUN; KLF5; MAP1B; SIRPA; THBS1; ZFYVE27;
PAX4	12	175	1.9802	1.72725	0.0466797	1	0.171978	0.193836	HMGA1; CREB5; RIPK4; YBX3; ZNF385B; ZNF652; FBXO2; BACH2; CACNG2; IVNS1ABP; MSX1; RAB27A;
PDX1	17	372	2.80528	1.15087	0.31099	1	0.548805	0.618557	CECR2; ELMSAN1; HMGA1; LMNB1; CREB5; STC1; LMAN1; NCAM2; CSRNP3; GCK; ARID5B; BACH2; FRMD6; PHC2; RUNX1; SIPA1L2; SPTBN1;
EOMES	18	291	2.9703	1.55769	0.0426413	1	0.162812	0.183505	CCL4; CDC42BPA; CREB5; NCF4; NFIL3; PDE4B; RAB26; UGCG; COL1A2; COQ10A; HEXIM2; SAMD3; TBX10; C2orf66; CIT; NR4A2; NR4A3; SYNE2;
T	5	46	0.825083	2.7407	0.0349264	1	0.143814	0.162093	ARRDC3; CCL4; SAMD3; TBX10; HBEGF;
TBX5	16	204	2.64026	1.97522	0.00750017	1	0.0525012	0.059174	CCL4; CREB5; TSLP; UGCG; HMBOX1; HSP90B1; SLC39A8; GNAO1; GRIA3; SAMD3; TBX10; CIT; FOXC1; HBEGF; NR4A3; SLC7A1;
ATF6	11	195	1.81518	1.42104	0.15421	1	0.355869	0.4011	FOSL2; MIDN; BCL3; STAT3; ZNF385B; COQ10A; GRIA3; NOL4; RORC; KCNK1; NR4A1;
STRA13	13	574	2.14521	0.570471	0.991943	1	1	1	MAP2K3; ZBTB21; CANX; WNK3; DBI; FAM13A; TRIM55; ELF3; JUN; KCNE4; KLF6; NCOA7; SOCS2;
ZIC1	29	548	4.78548	1.3324	0.0713873	1	0.211268	0.238119	ANXA1; ARRDC3; ERBB2; PIM1; SIN3A; TGFB1; THEMIS2; AUTS2; FLRT2; C2orf82; C9orf24; GNAO1; HEXIM2; NOL4; RORC; TMEM98; ADAMTS1; ATP2B4; EPHA2; LAMC2; LYST; MAP1B; NFKB2; NRG1; RPGR; SLC7A1; TGFB3; TUBB6; ZFYVE27;
DBX1	11	239	1.81518	1.15944	0.35227	1	0.606367	0.683435	BAZ1A; CREB5; PROK2; SPSB1; COL1A2; ZNF385B; ZNF652; ALPK2; SAMD3; EGR1; MBNL2;
FOXJ2	15	299	2.47525	1.26349	0.211388	1	0.43952	0.495382	CDC42EP3; ELMSAN1; ERBB2; CREB5; PDE11A; COL1A2; ZNF385B; FOSB; LGI1; ARID5B; CACNG2; FGF14; FILIP1L; PAPPA; RUNX1;
HOXD10	2	48	0.330033	1.05376	0.573851	1	0.815708	0.919383	CREB5; NRIP1;
ELF1	31	585	5.11551	1.33418	0.0631101	1	0.208035	0.234476	ALOX5AP; BCL2A1; BHLHE40; CSF2RB; EFHD2; ELMSAN1; EVI2B; FCER1G; FOSL2; ITPRIP; KCNJ15; MYADM; NCF4; PTPRE; TGFB1; TIE1; TMEM154; AUTS2; RAP1GDS1; SLC39A8; AMOT; FMO1; RNF43; CD274; CDKN1A; EPHA2; LIN28B; MAP3K8; NRG1; RUNX1; SERPINB2;
FOXJ1	3	31	0.49505	2.4431	0.123739	1	0.305088	0.343864	GNAO1; MBNL2; TGFB3;
E4F1	9	158	1.48515	1.43521	0.177674	1	0.396931	0.44738	MIDN; TLE3; FOSB; APOLD1; BEND3; EGR3; FGF14; FILIP1L; NR4A3;
ITGAL	9	178	1.48515	1.27396	0.277049	1	0.514752	0.580176	ERBB2; CREB5; LSP1; RAB5C; TRAF4; ADAMTS4; APOLD1; HBEGF; MYBPH;
ESX1	12	266	1.9802	1.13637	0.367759	1	0.622818	0.701977	ANXA1; BAZ1A; CREB5; ZNF217; AUTS2; COL1A2; ZNF385B; ZNF652; OSCP1; PCDH18; GPM6B; TNIK;
TLX2	6	60	0.990099	2.52073	0.0313115	1	0.138851	0.156499	ELMSAN1; CREB5; NRIP1; CBX5; COL1A2; KLF5;
DLX5	6	220	0.990099	0.687556	0.87455	1	0.992733	1	NFIL3; HEXIM2; NOL4; RNF43; MSX1; PRRX1;
HOXC10	2	81	0.330033	0.624501	0.837638	1	0.966505	1	ACSS2; PHYHIPL;
ATF4	23	315	3.79538	1.83852	0.00377293	0.792316	0.0304737	0.0343468	HIVEP1; CREB5; MAP1LC3A; PPP1R15A; RELB; SLC25A37; TAGLN2; TLE3; TRAF4; MAF; NOL4; PAQR7; ARG2; C2CD4A; ETNK1; GEM; GPM6B; KLF11; KLF4; MCAM; NR4A2; SPTBN1; ZFYVE27;
ELF3	29	437	4.78548	1.67083	0.00492872	1	0.0383345	0.0432067	ARHGAP30; CHIC2; FAM102B; IL18RAP; ITPRIP; LYZ; MXD1; NABP1; NRIP1; PTPRE; SBNO2; STAT3; STC1; TAGLN2; AUTS2; TWF1; CSRNP3; GRIA3; LRIG3; NOL4; RNF43; CCL2; ETNK1; FILIP1L; NFKBIZ; NR4A2; PHC2; RUNX1; SIRPA;
SPDEF	11	189	1.81518	1.46615	0.132802	1	0.316913	0.357192	ACVR2B; RAB5C; HSP90B1; CENPQ; TBC1D2; CSF3; FGF14; FILIP1L; IL1RL1; NR4A1; RRP12;
PAX5	8	149	1.32013	1.35298	0.241269	1	0.460604	0.519146	FAM65B; SGCE; ZFP36L2; FOSB; LIN28B; NCOA7; NR4A3; NRG1;
NKX3-1	1	61	0.165017	0.416674	0.916086	1	1	1	AUTS2;
RBPJ	14	235	2.31023	1.50047	0.0861415	1	0.238023	0.268275	CASP7; DNMBP; FADS2; GATAD2A; KRT8; LSP1; TLE3; YBX3; ACTG2; ADAM19; BEND3; CXCR4; NR4A3; WT1;
CEBPD	11	113	1.81518	2.45215	0.005288	1	0.03966	0.0447007	ELMSAN1; FOSL2; NFIL3; TMEM154; FOSB; FOS; SAMD3; APOLD1; ARID5B; CXCR4; NFKBIZ;
PATZ1	2	38	0.330033	1.33099	0.44907	1	0.703766	0.793214	NRIP1; IL6;
MAFK	5	128	0.825083	0.985076	0.578943	1	0.815959	0.919666	SGCE; TRAF4; RORC; SAMD3; MBNL2;
TP53	1	23	0.165017	1.10479	0.606676	1	0.831244	0.936893	CDKN1A;
ELF5	1	22	0.165017	1.15499	0.590379	1	0.82653	0.931581	FLRT2;
ALX1	2	56	0.330033	0.903246	0.65795	1	0.87449	0.985636	STC1; MBNL2;
PLAGL1	2	7	0.330033	7.21695	0.0289773	1	0.135227	0.152415	FOSB; RAPGEFL1;
PLAG1	1	1	0.165017	25.1696	0.0397299	1	0.15742	0.177428	MBNL2;

## Sheet: Clinical phenotype
Analysis: Clinical phenotype
Dataset name: SH
Clinical phenotype	No. of genes in the dataset	No. of genes in the background dataset	Percentage of genes	Fold enrichment	P-value (Hypergeometric test)	Bonferroni method	BH method	Q-value (Storey-Tibshirani method)	genes mapped (from input data set)
Abdomen	27	621	29.3478	0.860329	0.86577	1	1	1	DHODH; FCGR2A; KRT8; LMNB1; NCF1; NCF2; PKLR; RIPK4; TGFB1; ABCB11; HLA-DQA1; SEC63; ABCC6; ABCG8; CHRNB1; CPOX; GCK; NAGS; SLC12A1; TBX3; WNT5A; ACTG2; CYP27B1; FOXC1; IL6; LYST; PRRX1;
Abdominal aorta, calcification of	1	1	1.08696	19.7806	0.0505495	1	1	1	NT5E;
Abdominal distention (children)	1	2	1.08696	9.93949	0.09857	1	1	1	HLA-DQA1;
Abdominal distention due to mass effect of liver	1	2	1.08696	9.93949	0.09857	1	1	1	SEC63;
Abdominal pain	2	19	2.17391	2.09148	0.249042	1	1	1	ABCG8; IL6;
Abdominal pain (HCP)	1	1	1.08696	19.7806	0.0505495	1	1	1	CPOX;
Abdominal tumors (immunodeficiency-associated form)	1	1	1.08696	19.7806	0.0505495	1	1	1	MYC;
Abnormal bladder regulation due to autonomic dysfunction	1	1	1.08696	19.7806	0.0505495	1	1	1	LMNB1;
Abnormal bowel regulation due to autonomic dysfunction	1	1	1.08696	19.7806	0.0505495	1	1	1	LMNB1;
Abnormal EEG in 25% hospitalized patients	1	14	1.08696	1.42601	0.517552	1	1	1	CHI3L1;
Abnormal gait	1	9	1.08696	2.21736	0.373686	1	1	1	LYST;
Abnormal iris vasculature	1	1	1.08696	19.7806	0.0505495	1	1	1	FOXC1;
Abnormal nasal potential differences	2	3	2.17391	13.209	0.0073362	1	1	1	FCGR2A; TGFB1;
Abnormal platelet aggregation	1	3	1.08696	6.63733	0.144187	1	1	1	RUNX1;
Abnormal umbilicus	1	2	1.08696	9.93949	0.09857	1	1	1	WNT5A;
Abnormal uvula (89%)	1	1	1.08696	19.7806	0.0505495	1	1	1	WNT5A;
Abscesses are 'cold,' lacking erythema, heat, and swelling	1	1	1.08696	19.7806	0.0505495	1	1	1	STAT3;
Abscess formation in any organ	2	4	2.17391	9.91495	0.01419	1	1	1	NCF1; NCF2;
Absence of acetylcholine receptor (AChR) autoantibodies	1	7	1.08696	2.84998	0.304913	1	1	1	CHRNB1;
Absence of bactericidal oxidative 'respiratory burst' in phagocytes	2	4	2.17391	9.91495	0.01419	1	1	1	NCF1; NCF2;
Absence of cerebral aneurysms	1	2	1.08696	9.93949	0.09857	1	1	1	SEC63;
Absence of fifth digit	1	1	1.08696	19.7806	0.0505495	1	1	1	DHODH;
Absence of immunostaining to laminin 5 subunits	1	3	1.08696	6.63733	0.144187	1	1	1	LAMC2;
Absence of pancreatic autoantibodies	1	4	1.08696	4.98214	0.187519	1	1	1	GCK;
Absence of telethonin protein	1	1	1.08696	19.7806	0.0505495	1	1	1	TCAP;
Absent 3rd, 4th, and 5th ulnar rays	1	1	1.08696	19.7806	0.0505495	1	1	1	TBX3;
Absent abdominal wall musculature (rare)	1	1	1.08696	19.7806	0.0505495	1	1	1	ACTG2;
Absent calvarial mineralization	1	2	1.08696	9.93949	0.09857	1	1	1	COL1A2;
Absent clitoris (in some patients)	1	1	1.08696	19.7806	0.0505495	1	1	1	RIPK4;
Absent dermal ridges	1	5	1.08696	3.9877	0.22868	1	1	1	LAMC2;
Absent eyebrows (in some patients)	1	1	1.08696	19.7806	0.0505495	1	1	1	RIPK4;
Absent eyelashes (in some patients)	1	1	1.08696	19.7806	0.0505495	1	1	1	RIPK4;
Absent iris stromal pattern	1	1	1.08696	19.7806	0.0505495	1	1	1	FOXC1;
Absent nails	1	4	1.08696	4.98214	0.187519	1	1	1	RIPK4;
Absent natural killer cell cytotoxicity	1	2	1.08696	9.93949	0.09857	1	1	1	LYST;
Absent peripheral pulses	1	3	1.08696	6.63733	0.144187	1	1	1	ABCC6;
Absent pro alpha 2(I) chain synthesis (fibroblasts)	1	1	1.08696	19.7806	0.0505495	1	1	1	COL1A2;
Accelerated atherosclerosis	1	3	1.08696	6.63733	0.144187	1	1	1	ABCC6;
Accessory nipples	1	2	1.08696	9.93949	0.09857	1	1	1	DHODH;
Accounts for 1-2% of lymphomas in adults	1	1	1.08696	19.7806	0.0505495	1	1	1	MYC;
Accounts for 30-50% of lymphomas in children	1	1	1.08696	19.7806	0.0505495	1	1	1	MYC;
Accumulation of melanosomes in melanocytes	1	2	1.08696	9.93949	0.09857	1	1	1	RAB27A;
ACETYLATION, SLOW	1	1	1.08696	19.7806	0.0505495	1	1	1	NAT2;
Acneiform lesions (rare)	1	3	1.08696	6.63733	0.144187	1	1	1	ABCC6;
Acute demyelinating polyneuropathy	1	1	1.08696	19.7806	0.0505495	1	1	1	PMP22;
Acute episodes of neuropathic symptoms (HCP)	1	1	1.08696	19.7806	0.0505495	1	1	1	CPOX;
Acute monocytic leukemia	1	1	1.08696	19.7806	0.0505495	1	1	1	RUNX1;
Acute myelocytic leukemia	1	1	1.08696	19.7806	0.0505495	1	1	1	RUNX1;
Acute neurologic deterioration after viral illness has been reported	1	1	1.08696	19.7806	0.0505495	1	1	1	LMNB1;
Adenocarcinoma of the ileum	2	3	2.17391	13.209	0.0073362	1	1	1	FCGR2A; TGFB1;
ADENOSINE TRIPHOSPHATE, ELEVATED, OF ERYTHROCYTES	1	1	1.08696	19.7806	0.0505495	1	1	1	PKLR;
Adult height 92-108 cm	1	2	1.08696	9.93949	0.09857	1	1	1	COL1A2;
Adult onset (range 40 to 60 years)	1	1	1.08696	19.7806	0.0505495	1	1	1	TIA1;
Affected patients have various combinations of the main clinical features	1	1	1.08696	19.7806	0.0505495	1	1	1	SYN1;
Age at onset from 3 to 51 years (mean 19.2 years)	1	1	1.08696	19.7806	0.0505495	1	1	1	LGI1;
Agenesis of the corpus callosum (variable)	1	1	1.08696	19.7806	0.0505495	1	1	1	PRRX1;
Aggression	1	17	1.08696	1.17451	0.587626	1	1	1	GRIA3;
Aggression (if left untreated)	1	1	1.08696	19.7806	0.0505495	1	1	1	PAH;
Aggressive behavior	3	20	3.26087	2.97549	0.0764172	1	1	1	NAGS; HDC; SYN1;
Aglossia	1	1	1.08696	19.7806	0.0505495	1	1	1	PRRX1;
Agnathia	1	1	1.08696	19.7806	0.0505495	1	1	1	PRRX1;
Agoraphobia	1	2	1.08696	9.93949	0.09857	1	1	1	SGCE;
Airways	3	66	3.26087	0.901977	0.659476	1	1	1	FCGR2A; TGFB1; PRRX1;
Allelic disorders with overlapping phenotypes include Charcot-Marie-Tooth disease type 1 (CMT1B,	1	2	1.08696	9.93949	0.09857	1	1	1	PMP22;
Allelic disorders with overlapping phenotypes include CMT1A (	1	1	1.08696	19.7806	0.0505495	1	1	1	PMP22;
Allelic disorders with overlapping phenotypes include Dejerine-Sottas syndrome (DSS,	1	1	1.08696	19.7806	0.0505495	1	1	1	PMP22;
Allelic disorder to Charcot-Marie-Tooth disease type 1A (	1	1	1.08696	19.7806	0.0505495	1	1	1	PMP22;
Allelic disorder to dilated cardiomyopathy 1N (CMD1N,	1	1	1.08696	19.7806	0.0505495	1	1	1	TCAP;
Allelic disorder to progressive familial intrahepatic cholestasis-2 (PFIC2,	1	1	1.08696	19.7806	0.0505495	1	1	1	ABCB11;
Allelic to autosomal recessive PXE (	1	1	1.08696	19.7806	0.0505495	1	1	1	ABCC6;
Alopecia	1	22	1.08696	0.907695	0.682727	1	1	1	HLA-DQA1;
Alopecia totalis (in some patients)	1	1	1.08696	19.7806	0.0505495	1	1	1	RIPK4;
Alveolar cell carcinoma	3	16	3.26087	3.71889	0.0433807	1	1	1	ERBB2; IRF1; MAP3K8;
Alveolar rhabdomyosarcoma	1	3	1.08696	6.63733	0.144187	1	1	1	FOXO1;
Ambiguous genitalia	3	11	3.26087	5.40777	0.0153469	1	1	1	RIPK4; SRD5A2; WT1;
Amblyopia	1	7	1.08696	2.84998	0.304913	1	1	1	CRYAA;
Amniotic Fluid	3	68	3.26087	0.875452	0.679613	1	1	1	PKLR; SLC12A1; ACTG2;
AMYLOIDOSIS, FAMILIAL VISCERAL	1	3	1.08696	6.63733	0.144187	1	1	1	LYZ;
Anal atresia	1	10	1.08696	1.99584	0.405503	1	1	1	TBX3;
Anal stenosis	2	11	2.17391	3.61117	0.103328	1	1	1	RIPK4; TBX3;
Anemia	2	43	2.17391	0.924412	0.649871	1	1	1	TGFB1; LYST;
Anemia may be exacerbated during infection or pregnancy	1	1	1.08696	19.7806	0.0505495	1	1	1	PKLR;
Aneurysm, ascending aorta	1	1	1.08696	19.7806	0.0505495	1	1	1	MYH11;
Aneurysm, descending aorta (in some patients)	1	1	1.08696	19.7806	0.0505495	1	1	1	MYH11;
Angina	1	3	1.08696	6.63733	0.144187	1	1	1	ABCC6;
Angina pectoris	1	3	1.08696	6.63733	0.144187	1	1	1	ABCC6;
Angioid streaks of the retina	1	1	1.08696	19.7806	0.0505495	1	1	1	ABCC6;
Angioid streaks of the retina (85% of patients)	1	3	1.08696	6.63733	0.144187	1	1	1	ABCC6;
Anhydramnios	1	4	1.08696	4.98214	0.187519	1	1	1	ACTG2;
Ankyloblepharon filiforme	1	1	1.08696	19.7806	0.0505495	1	1	1	RIPK4;
Anteriorly displaced eyes	1	1	1.08696	19.7806	0.0505495	1	1	1	FOXC1;
Anterior pituitary hypoplasia	1	3	1.08696	6.63733	0.144187	1	1	1	TBX3;
Anteverted nares (96%)	1	2	1.08696	9.93949	0.09857	1	1	1	WNT5A;
Anteverted nostrils	1	18	1.08696	1.10929	0.608668	1	1	1	GCK;
Anti-tissue transglutaminase antibodies (anti-tTG)	1	2	1.08696	9.93949	0.09857	1	1	1	HLA-DQA1;
Anxiety	2	18	2.17391	2.2076	0.229915	1	1	1	SGCE; HLA-DQA1;
Anxiety disorders	1	2	1.08696	9.93949	0.09857	1	1	1	PAH;
Anxiety (HCP)	1	1	1.08696	19.7806	0.0505495	1	1	1	CPOX;
Aortic insufficiency	1	4	1.08696	4.98214	0.187519	1	1	1	COL1A2;
Aortic valve regurgitation	1	3	1.08696	6.63733	0.144187	1	1	1	MYH11;
Aortic valve ring calcification (in some patients)	1	1	1.08696	19.7806	0.0505495	1	1	1	NT5E;
Aphthous ulcers	1	3	1.08696	6.63733	0.144187	1	1	1	IL6;
Aphthous ulcers (lips, gingiva, buccal mucosa)	1	2	1.08696	9.93949	0.09857	1	1	1	IL6;
Areflexia	1	38	1.08696	0.525608	0.863576	1	1	1	PMP22;
Areflexia in lower limbs	1	2	1.08696	9.93949	0.09857	1	1	1	TCAP;
Arteriomegaly, diffuse, secondary to femoropopliteal occlusion	1	1	1.08696	19.7806	0.0505495	1	1	1	NT5E;
Arteriosclerosis	1	2	1.08696	9.93949	0.09857	1	1	1	ABCC6;
ARTERIOVENOUS MALFORMATIONS OF THE BRAIN	1	1	1.08696	19.7806	0.0505495	1	1	1	IL6;
Arthralgia	1	7	1.08696	2.84998	0.304913	1	1	1	HLA-DQA1;
Arthritis	1	14	1.08696	1.42601	0.517552	1	1	1	ABCG8;
A single recessive locus and other genetic factors cause > 75% of variation	1	16	1.08696	1.24787	0.565466	1	1	1	ADRB2;
Aspergillus infections	2	4	2.17391	9.91495	0.01419	1	1	1	NCF1; NCF2;
Associated with several congenital malformation syndromes (WAGR	1	3	1.08696	6.63733	0.144187	1	1	1	WT1;
Associated with several loci on chromosomes 11p15 (WT2,	1	3	1.08696	6.63733	0.144187	1	1	1	WT1;
Asthenic body habitus	1	1	1.08696	19.7806	0.0505495	1	1	1	GRIA3;
Asthenic habitus	1	1	1.08696	19.7806	0.0505495	1	1	1	TGFB1;
Asthma	5	31	5.43478	3.19576	0.0176904	1	1	1	ADRB2; ALOX5; FCGR2A; TGFB1; IL4R;
ASTHMA, SUSCEPTIBILITY TO	2	13	2.17391	3.05603	0.137381	1	1	1	ADRB2; ALOX5;
Astrocytes show reactive changes	1	1	1.08696	19.7806	0.0505495	1	1	1	LMNB1;
Astrocytomas	1	3	1.08696	6.63733	0.144187	1	1	1	ERBB2;
Asymmetric face	1	3	1.08696	6.63733	0.144187	1	1	1	STAT3;
Asymmetric nipples (in some patients)	1	1	1.08696	19.7806	0.0505495	1	1	1	RIPK4;
Ataxia	1	130	1.08696	0.153668	0.999089	1	1	1	HLA-DQA1;
Ataxic gait	1	7	1.08696	2.84998	0.304913	1	1	1	PMP22;
Atherosclerosis	1	5	1.08696	3.9877	0.22868	1	1	1	ABCG8;
Atopic hypersensitivity	1	8	1.08696	2.49418	0.340185	1	1	1	IL4R;
Atrial septal defect	1	47	1.08696	0.424981	0.915429	1	1	1	FOXC1;
Atrophic muscle fiber on biopsy	1	1	1.08696	19.7806	0.0505495	1	1	1	TGFB1;
Atrophic scarring	1	7	1.08696	2.84998	0.304913	1	1	1	LAMC2;
Atrophic scars	1	2	1.08696	9.93949	0.09857	1	1	1	COL1A2;
Atrophic spinal cord	1	1	1.08696	19.7806	0.0505495	1	1	1	LMNB1;
Atrophy of affected muscles, especially intrinsic hand muscles	1	4	1.08696	4.98214	0.187519	1	1	1	CHRNB1;
Atrophy of the corpus callosum	1	3	1.08696	6.63733	0.144187	1	1	1	LMNB1;
Attacks precipitated by drugs, alcohol, and endocrine factors (HCP)	1	1	1.08696	19.7806	0.0505495	1	1	1	CPOX;
Attacks rarely occur before puberty (HCP)	1	1	1.08696	19.7806	0.0505495	1	1	1	CPOX;
Attention deficit disorder (in those who stop treatment)	1	1	1.08696	19.7806	0.0505495	1	1	1	PAH;
Attention deficit hyperactivity disorder (ADHD)	1	2	1.08696	9.93949	0.09857	1	1	1	HDC;
Auditory auras	1	1	1.08696	19.7806	0.0505495	1	1	1	LGI1;
Autism spectrum disorders	1	1	1.08696	19.7806	0.0505495	1	1	1	SYN1;
Autistic features	1	25	1.08696	0.798815	0.729005	1	1	1	GRIA3;
Autistic features (if left untreated)	1	1	1.08696	19.7806	0.0505495	1	1	1	PAH;
Autoimmune thyroiditis	1	2	1.08696	9.93949	0.09857	1	1	1	HLA-DQA1;
Autonomic dysfunction	1	7	1.08696	2.84998	0.304913	1	1	1	LMNB1;
Autonomic dysfunction usually precedes obvious neurologic deterioration	1	1	1.08696	19.7806	0.0505495	1	1	1	LMNB1;
Autosomal dominant	53	747	57.6087	1.40369	0.000744522	1	1	1	CETP; CHIC2; CSF3R; ERBB2; HMGA1; IL1RN; LITAF; LMNB1; LRRK2; LYZ; PKLR; PTPN1; SGCE; STAT3; TGFB1; TLR2; COL1A2; CYP2C9; EFEMP1; LPP; SEC63; TIA1; ABCC6; BRCA1; CEBPA; CHRNB1; CPOX; CRYAA; GCK; KIF22; LGI1; TBX3; WNT5A; ACTG2; CHI3L1; CXCR4; EPHA2; FOXC1; HDC; IL1B; IL4R; IL6; IRS2; LDLR; MSX1; MYH11; OSMR; PMP22; PRRX1; RUNX1; TGFB3; VCAN; WT1;
Autosomal dominant form	3	37	3.26087	1.60874	0.286771	1	1	1	CCL2; KLF6; PMP22;
Autosomal dominant inheritance is more common	1	4	1.08696	4.98214	0.187519	1	1	1	CHRNB1;
Autosomal dominantly acting oncogene plus loss of suppressor gene(s)	1	25	1.08696	0.798815	0.729005	1	1	1	TLR2;
Autosomal dominant vs. multifactorial	2	14	2.17391	2.8379	0.155223	1	1	1	ADRB2; ALOX5;
Autosomal locus and allelic heterogeneity	1	1	1.08696	19.7806	0.0505495	1	1	1	IL2RA;
Autosomal recessive	35	924	38.0435	0.74947	0.995635	1	1	1	DHODH; ERBB2; FCGR2A; IRF1; ITGB2; NCF1; NCF2; PKLR; RIPK4; SRD5A2; TGFB1; ABCB11; COL1A2; HLA-DQA1; LMAN1; PAH; NAT2; NT5E; TIA1; ABCC6; ABCG8; CHRNB1; NAGS; SLC12A1; TCAP; CYP27B1; FOXO1; LAMC2; LYST; MAP3K8; PMP22; PRRX1; RAB27A; TACSTD2; WT1;
Autosomal recessive and dominant pedigrees described	1	1	1.08696	19.7806	0.0505495	1	1	1	DHODH;
Autosomal recessive cases, probably heterogeneous	1	2	1.08696	9.93949	0.09857	1	1	1	KRT8;
Autosomal recessive cytochrome b-negative CGD (	2	3	2.17391	13.209	0.0073362	1	1	1	NCF1; NCF2;
Autosomal recessive cytochrome b-positive CGD, type I (	1	3	1.08696	6.63733	0.144187	1	1	1	NCF2;
Autosomal recessive cytochrome b-positive CGD, type I	1	1	1.08696	19.7806	0.0505495	1	1	1	NCF1;
Autosomal recessive cytochrome b-positive CGD, type II (	1	3	1.08696	6.63733	0.144187	1	1	1	NCF1;
Autosomal recessive cytochrome b-positive CGD, type II	1	1	1.08696	19.7806	0.0505495	1	1	1	NCF2;
Autosomal recessive inheritance has been reported in 1 case	1	1	1.08696	19.7806	0.0505495	1	1	1	PRRX1;
Average age at onset 38 years	2	4	2.17391	9.91495	0.01419	1	1	1	IL1RN; IL1B;
Axial hypotonia	1	20	1.08696	0.998419	0.647617	1	1	1	GCK;
Axillary apocrine gland hypoplasia	1	1	1.08696	19.7806	0.0505495	1	1	1	TBX3;
Axillary pterygium, bilateral (in some patients)	1	1	1.08696	19.7806	0.0505495	1	1	1	RIPK4;
Back pain due to mass effect of liver	1	2	1.08696	9.93949	0.09857	1	1	1	SEC63;
Bacterial infections, recurrent	2	4	2.17391	9.91495	0.01419	1	1	1	NCF1; NCF2;
BARTTER SYNDROME, ANTENATAL, TYPE 1	1	1	1.08696	19.7806	0.0505495	1	1	1	SLC12A1;
Basilar impression	1	2	1.08696	9.93949	0.09857	1	1	1	COL1A2;
Beaded ribs	1	3	1.08696	6.63733	0.144187	1	1	1	COL1A2;
Beaked nose	1	14	1.08696	1.42601	0.517552	1	1	1	COL1A2;
Behavioral Psychiatric Manifestations	9	200	9.78261	0.89107	0.699018	1	1	1	LMNB1; SGCE; HLA-DQA1; PAH; CPOX; GRIA3; NAGS; CYP27B1; SYN1;
Beta-cell dysfunction	1	4	1.08696	4.98214	0.187519	1	1	1	GCK;
Biconcave flattened vertebrae	1	2	1.08696	9.93949	0.09857	1	1	1	COL1A2;
Bifid scrotum	1	10	1.08696	1.99584	0.405503	1	1	1	SRD5A2;
Bifid terminal phalanges	1	2	1.08696	9.93949	0.09857	1	1	1	WNT5A;
Bifid tongue (39%)	1	1	1.08696	19.7806	0.0505495	1	1	1	WNT5A;
Biliary cirrhosis	2	4	2.17391	9.91495	0.01419	1	1	1	FCGR2A; TGFB1;
Biliary Tract	3	30	3.26087	1.98399	0.190877	1	1	1	FCGR2A; PKLR; TGFB1;
Biopsy shows lipid-laden macrophages	2	4	2.17391	9.91495	0.01419	1	1	1	NCF1; NCF2;
Bladder	3	90	3.26087	0.661477	0.845961	1	1	1	LMNB1; ABCC6; ACTG2;
Bladder hemorrhage	1	3	1.08696	6.63733	0.144187	1	1	1	ABCC6;
Bleeding diathesis	1	7	1.08696	2.84998	0.304913	1	1	1	LMAN1;
Bleeding tendencies	1	2	1.08696	9.93949	0.09857	1	1	1	ABCG8;
Blind-ended trachea	1	1	1.08696	19.7806	0.0505495	1	1	1	PRRX1;
Blind perineal pouch resembling vagina	1	1	1.08696	19.7806	0.0505495	1	1	1	SRD5A2;
Blond hair	1	2	1.08696	9.93949	0.09857	1	1	1	PAH;
Blue eyes	1	2	1.08696	9.93949	0.09857	1	1	1	PAH;
Blue sclerae	2	10	2.17391	3.97192	0.0873311	1	1	1	COL1A2; ABCC6;
Blue sclerae at birth becoming normal with age	1	2	1.08696	9.93949	0.09857	1	1	1	COL1A2;
Blurred vision (early symptom)	1	1	1.08696	19.7806	0.0505495	1	1	1	TACSTD2;
Bone marrow hypercellularity	1	1	1.08696	19.7806	0.0505495	1	1	1	CXCR4;
Bone marrow hypoplasia	1	1	1.08696	19.7806	0.0505495	1	1	1	TGFB1;
Bone pain	1	12	1.08696	1.66348	0.464418	1	1	1	CYP27B1;
Bony synostosis	1	1	1.08696	19.7806	0.0505495	1	1	1	RIPK4;
Bowed limbs due to multiple fractures	1	2	1.08696	9.93949	0.09857	1	1	1	COL1A2;
Bowel obstruction	1	2	1.08696	9.93949	0.09857	1	1	1	IL6;
Bowing of limbs due to multiple fractures	1	3	1.08696	6.63733	0.144187	1	1	1	COL1A2;
Bowing of the legs	1	6	1.08696	3.32419	0.267777	1	1	1	CYP27B1;
Brachycephaly	1	37	1.08696	0.53981	0.856154	1	1	1	GRIA3;
Brachydactyly (81%)	1	1	1.08696	19.7806	0.0505495	1	1	1	WNT5A;
Brachymesophalangism V	1	2	1.08696	9.93949	0.09857	1	1	1	WNT5A;
Bradykinesia	1	24	1.08696	0.832086	0.714373	1	1	1	LRRK2;
Brain calcification (if left untreated)	1	1	1.08696	19.7806	0.0505495	1	1	1	PAH;
Brain imaging shows decreased white matter density	1	1	1.08696	19.7806	0.0505495	1	1	1	LMNB1;
Breast cancer	1	5	1.08696	3.9877	0.22868	1	1	1	BRCA1;
Breast cancer, lobular	2	4	2.17391	9.91495	0.01419	1	1	1	IL1RN; IL1B;
Breast hypoplasia	1	5	1.08696	3.9877	0.22868	1	1	1	TBX3;
Breasts	3	55	3.26087	1.08234	0.533434	1	1	1	DHODH; RIPK4; TBX3;
Breech presentation	1	7	1.08696	2.84998	0.304913	1	1	1	COL1A2;
Bridging fibrosis shown on biopsy	1	2	1.08696	9.93949	0.09857	1	1	1	ABCB11;
Broad crumpled long bones	1	2	1.08696	9.93949	0.09857	1	1	1	COL1A2;
Broad nasal bridge (97%)	1	1	1.08696	19.7806	0.0505495	1	1	1	WNT5A;
Broad nose	1	9	1.08696	2.21736	0.373686	1	1	1	STAT3;
Broad, square ends of distal phalanges	1	1	1.08696	19.7806	0.0505495	1	1	1	KIF22;
Broad thumbs (36%)	1	1	1.08696	19.7806	0.0505495	1	1	1	WNT5A;
Broad toes (33%)	1	1	1.08696	19.7806	0.0505495	1	1	1	WNT5A;
Bronchiectasis	2	11	2.17391	3.61117	0.103328	1	1	1	FCGR2A; TGFB1;
Brown macules in a reticulate pattern (rare)	1	3	1.08696	6.63733	0.144187	1	1	1	ABCC6;
Bulging' epiphyses	1	5	1.08696	3.9877	0.22868	1	1	1	CYP27B1;
Bulging' of the costochondral junction	1	2	1.08696	9.93949	0.09857	1	1	1	CYP27B1;
Burkholderia cepacia infections	2	4	2.17391	9.91495	0.01419	1	1	1	NCF1; NCF2;
Burkitt lymphoma (B-cell lymphoma)	1	1	1.08696	19.7806	0.0505495	1	1	1	MYC;
Calcaneovalgus	1	3	1.08696	6.63733	0.144187	1	1	1	COL1A2;
Calcification of falx cerebri	1	2	1.08696	9.93949	0.09857	1	1	1	ABCC6;
Calcifications (atrial and ventricular endocardium)	1	3	1.08696	6.63733	0.144187	1	1	1	ABCC6;
Calcium accumulation in junctional folds seen on muscle biopsy	1	4	1.08696	4.98214	0.187519	1	1	1	CHRNB1;
Calf hypertrophy (reported in 1 family)	1	1	1.08696	19.7806	0.0505495	1	1	1	TCAP;
Can be effectively treated with N-carbamylglutamate	1	1	1.08696	19.7806	0.0505495	1	1	1	NAGS;
Can be treated with physiologic levels of 1,25-dihydroxyvitamin D3 or 1-alpha-hydroxyvitamin D3	1	1	1.08696	19.7806	0.0505495	1	1	1	CYP27B1;
Cardiac muscle is involved in a subset of patients	1	1	1.08696	19.7806	0.0505495	1	1	1	TCAP;
Cardiomyopathy, right ventricular	1	2	1.08696	9.93949	0.09857	1	1	1	TGFB3;
Cardiovascular	19	446	20.6522	0.843095	0.843028	1	1	1	FCGR2A; LMNB1; TGFB1; COL1A2; CYP3A5; NT5E; SEC63; ABCC6; ABCG8; CPOX; SLC12A1; TBX3; TCAP; WNT5A; FOXC1; LDLR; MYH11; TGFB3; WT1;
Carotid aneurysm, intracranial (in some patients)	1	1	1.08696	19.7806	0.0505495	1	1	1	MYH11;
Carrier females may be affected	1	1	1.08696	19.7806	0.0505495	1	1	1	SYN1;
Cataract	1	36	1.08696	0.554801	0.848333	1	1	1	VCAN;
Cataract, anterior polar	1	1	1.08696	19.7806	0.0505495	1	1	1	CRYAA;
Cataract, anterior subcapsular	1	1	1.08696	19.7806	0.0505495	1	1	1	CRYAA;
Cataract, congenital, multiple types	1	2	1.08696	9.93949	0.09857	1	1	1	CRYAA;
Cataract, cortical	1	1	1.08696	19.7806	0.0505495	1	1	1	CRYAA;
Cataract, fan-shaped	1	1	1.08696	19.7806	0.0505495	1	1	1	CRYAA;
Cataract, lamellar	1	1	1.08696	19.7806	0.0505495	1	1	1	CRYAA;
Cataract, laminar	1	1	1.08696	19.7806	0.0505495	1	1	1	CRYAA;
Cataract, nuclear	1	3	1.08696	6.63733	0.144187	1	1	1	CRYAA;
Cataract, posterior polar	1	2	1.08696	9.93949	0.09857	1	1	1	CRYAA;
Cataract, posterior subcapsular	1	1	1.08696	19.7806	0.0505495	1	1	1	CRYAA;
Cataract, presenile	1	1	1.08696	19.7806	0.0505495	1	1	1	CRYAA;
Cataract, progressive (in some patients)	1	1	1.08696	19.7806	0.0505495	1	1	1	CRYAA;
Cataracts	1	49	1.08696	0.407639	0.92398	1	1	1	PAH;
Cataract, total	1	1	1.08696	19.7806	0.0505495	1	1	1	CRYAA;
Cataract, zonular central nuclear	1	1	1.08696	19.7806	0.0505495	1	1	1	CRYAA;
Catatonic behavior	1	14	1.08696	1.42601	0.517552	1	1	1	CHI3L1;
Caudal narrowing of interpedicular distances	1	1	1.08696	19.7806	0.0505495	1	1	1	KIF22;
Cavitating white matter degeneration	1	1	1.08696	19.7806	0.0505495	1	1	1	LMNB1;
Cellulitis due to immunodeficiency	2	4	2.17391	9.91495	0.01419	1	1	1	NCF1; NCF2;
Centralized myonuclei	1	1	1.08696	19.7806	0.0505495	1	1	1	TCAP;
Central Nervous System	27	887	29.3478	0.60233	0.999967	1	1	1	LMNB1; LRRK2; SGCE; TGFB1; COL1A2; HLA-DQA1; PAH; SEC63; ABCC6; CPOX; GCK; GRIA3; KIF22; LGI1; NAGS; SLC12A1; TBX3; WNT5A; CHI3L1; CYP27B1; FOXC1; HDC; LYST; MYH11; PRRX1; RAB27A; SYN1;
Central vision loss	1	4	1.08696	4.98214	0.187519	1	1	1	ABCC6;
Cerebellar ataxia	1	27	1.08696	0.739666	0.756079	1	1	1	LMNB1;
Cerebellar signs	2	11	2.17391	3.61117	0.103328	1	1	1	LMNB1; RAB27A;
Cerebellar vermis hypoplasia	1	9	1.08696	2.21736	0.373686	1	1	1	FOXC1;
Cerebellar vermis hypoplasia (in some patients)	1	1	1.08696	19.7806	0.0505495	1	1	1	FOXC1;
Cerebral arteriovenous malformation	1	4	1.08696	4.98214	0.187519	1	1	1	IL6;
Cerebral calcification	1	2	1.08696	9.93949	0.09857	1	1	1	HLA-DQA1;
Cerebral hemorrhage	1	10	1.08696	1.99584	0.405503	1	1	1	ABCC6;
Cervical muscle weakness	1	4	1.08696	4.98214	0.187519	1	1	1	CHRNB1;
Cervical papillomatosis with cervical dysplasia	1	1	1.08696	19.7806	0.0505495	1	1	1	CXCR4;
CHARCOT-MARIE-TOOTH DISEASE AND DEAFNESS	1	1	1.08696	19.7806	0.0505495	1	1	1	PMP22;
Chest	8	243	8.69565	0.651999	0.940773	1	1	1	DHODH; RIPK4; COL1A2; ABCC6; TBX3; WNT5A; CYP27B1; WT1;
Childhood onset	1	3	1.08696	6.63733	0.144187	1	1	1	PMP22;
Choanal atresia	1	17	1.08696	1.17451	0.587626	1	1	1	DHODH;
Cholecystitis	1	3	1.08696	6.63733	0.144187	1	1	1	PKLR;
Cholelithiasis	2	6	2.17391	6.61546	0.0331942	1	1	1	PKLR; ABCB11;
Cholesterol biosynthesis severely depressed	1	2	1.08696	9.93949	0.09857	1	1	1	ABCG8;
Cholesteryl ester transfer protein deficiency	1	1	1.08696	19.7806	0.0505495	1	1	1	CETP;
Chondrocalcinosis	1	6	1.08696	3.32419	0.267777	1	1	1	SLC12A1;
Chorioretinal atrophy	1	2	1.08696	9.93949	0.09857	1	1	1	VCAN;
Choroidal neovascularization	1	4	1.08696	4.98214	0.187519	1	1	1	ABCC6;
Chromosomal translocations involving c-myc (	1	1	1.08696	19.7806	0.0505495	1	1	1	MYC;
Chronic bronchopulmonary infection	2	3	2.17391	13.209	0.0073362	1	1	1	FCGR2A; TGFB1;
[truncated: 1,336 more rows]

## Sheet: COSMIC
Analysis: COSMIC
Dataset name: SH
[truncated: 34 more rows]
