# Supplementary material for: Identification of Shared Gene Signatures in Different Stages of Non-Alcoholic Fatty Liver Disease Using Integrated Microarray Dataset
Source: Research Square preprint supplement (doi:10.21203/rs.3.rs-130713/v1), 2020-12-23
Supplement: Supplementary file 2 [file fabc1c74b4597847d549c5a6.xlsx]

## Sheet: Dataset(NH)
Dataset item (Gene symbol )		Entrez ID	Gene symbol	Description	Alternate names	Chromosome	Map location
FMO1		2326	FMO1	flavin containing monooxygenase 1	-	1	1q24.3
TP53I3		9540	TP53I3	tumor protein p53 inducible protein 3	PIG3	2	2p23.3
TYMS		7298	TYMS	thymidylate synthetase	HST422|TMS|TS	18	18p11.32
WNT5A		7474	WNT5A	wingless-type MMTV integration site family, member 5A	hWNT5A	3	3p21-p14
GINS2		51659	GINS2	GINS complex subunit 2 (Psf2 homolog)	HSPC037|PSF2|Pfs2	16	16q24.1
CCDC121		79635	CCDC121	coiled-coil domain containing 121	-	2	2p23.3
HMMR		3161	HMMR	hyaluronan-mediated motility receptor (RHAMM)	CD168|IHABP|RHAMM	5	5q34
TMEM169		92691	TMEM169	transmembrane protein 169	-	2	2q35
ZWINT		11130	ZWINT	ZW10 interacting kinetochore protein	HZwint-1|KNTC2AP|SIP30|ZWINT1	10	10q21-q22
NAT8B		51471	NAT8B	N-acetyltransferase 8B (GCN5-related, putative, gene/pseudogene)	CML2|Hcml2|NAT8BP	2	2p13.1
LRRC20		55222	LRRC20	leucine rich repeat containing 20	-	10	10q22.1
BCAR3		8412	BCAR3	breast cancer anti-estrogen resistance 3	NSP2|SH2D3B	1	1p22.1
RNF43		54894	RNF43	ring finger protein 43	RNF124|URCC	17	17q22
APOL3		80833	APOL3	apolipoprotein L, 3	APOLIII|CG121|CG12_1|apoL-III	22	22q13.1
PEG10		23089	PEG10	paternally expressed 10	EDR|HB-1|MEF3L|Mar2|Mart2|RGAG3	7	7q21
AKR1B10		57016	AKR1B10	aldo-keto reductase family 1, member B10 (aldose reductase)	AKR1B11|AKR1B12|ALDRLn|ARL-1|ARL1|HIS|HSI	7	7q33
ASPM		259266	ASPM	asp (abnormal spindle) homolog, microcephaly associated (Drosophila)	ASP|Calmbp1|MCPH5	1	1q31
CKAP2		26586	CKAP2	cytoskeleton associated protein 2	LB1|TMAP|se20-10	13	13q14
TBX10		347853	TBX10	T-box 10	TBX13|TBX7	11	11q13.2
KRT222		125113	KRT222	keratin 222, type II	KA21|KRT222P	17	17q21.2
FBXO27		126433	FBXO27	F-box protein 27	FBG5|Fbx27	19	19q13.2
GRIA3		2892	GRIA3	glutamate receptor, ionotropic, AMPA 3	GLUR-C|GLUR-K3|GLUR3|GLURC|GluA3|MRX94	X	Xq25
CYP7A1		1581	CYP7A1	cytochrome P450, family 7, subfamily A, polypeptide 1	CP7A|CYP7|CYPVII	8	8q11-q12
LGALS4		3960	LGALS4	lectin, galactoside-binding, soluble, 4	GAL4|L36LBP	19	19q13.2
PDP2		57546	PDP2	pyruvate dehyrogenase phosphatase catalytic subunit 2	PPM2C2	16	16q22.1
C11orf52		91894	C11orf52	chromosome 11 open reading frame 52	-	11	11q23.1
IFIT3		3437	IFIT3	interferon-induced protein with tetratricopeptide repeats 3	CIG-49|GARG-49|IFI60|IFIT4|IRG2|ISG60|P60|RIG-G|cig41	10	10q24
NOL3		8996	NOL3	nucleolar protein 3 (apoptosis repressor with CARD domain)	ARC|FCM|MYP|NOP|NOP30	16	16q22.1
ISM1		140862	ISM1	isthmin 1, angiogenesis inhibitor	C20orf82|ISM|Isthmin|bA149I18.1|dJ1077I2.1	20	20p12.1
RTP3		83597	RTP3	receptor (chemosensory) transporter protein 3	LTM1|TMEM7|Z3CXXC3	3	3p21.3
GLT8D1		55830	GLT8D1	glycosyltransferase 8 domain containing 1	AD-017|MSTP139	3	3p21.1
IFIT2		3433	IFIT2	interferon-induced protein with tetratricopeptide repeats 2	G10P2|GARG-39|IFI-54|IFI-54K|IFI54|IFIT-2|ISG-54 K|ISG-54K|ISG54|P54|cig42	10	10q23.31
C19orf25		148223	C19orf25	chromosome 19 open reading frame 25	-	19	19p13.3
DDO		8528	DDO	D-aspartate oxidase	DASOX|DDO-1|DDO-2	6	6q21
FBXO2		26232	FBXO2	F-box protein 2	FBG1|FBX2|Fbs1|NFB42|OCP1	1	1p36.22
MAL2		114569	MAL2	mal, T-cell differentiation protein 2 (gene/pseudogene)	-	8	8q23
RAB26		25837	RAB26	RAB26, member RAS oncogene family	V46133	16	16p13.3
TRIM14		9830	TRIM14	tripartite motif containing 14	-	9	9q22.33
RMND1		55005	RMND1	required for meiotic nuclear division 1 homolog (S. cerevisiae)	C6orf96|COXPD11|RMD1|bA351K16|bA351K16.3	6	6q25.1
THAP2		83591	THAP2	THAP domain containing, apoptosis associated protein 2	-	12	12q21.1
FRAT1		10023	FRAT1	frequently rearranged in advanced T-cell lymphomas 1	-	10	10q24.1
ME1		4199	ME1	malic enzyme 1, NADP(+)-dependent, cytosolic	HUMNDME|MES	6	6q12
CX3CR1		1524	CX3CR1	chemokine (C-X3-C motif) receptor 1	CCRL1|CMKBRL1|CMKDR1|GPR13|GPRV28|V28	3	3p21.3
PRSS3		5646	PRSS3	protease, serine, 3	MTG|PRSS4|T9|TRY3|TRY4	9	9p11.2
MOGAT2		80168	MOGAT2	monoacylglycerol O-acyltransferase 2	DGAT2L5|MGAT2	11	11q13.5
MANBAL		63905	MANBAL	mannosidase, beta A, lysosomal-like	-	20	20q11.23
SLC29A1		2030	SLC29A1	solute carrier family 29 (equilibrative nucleoside transporter), member 1	ENT1	6	6p21.1
P2RY2		5029	P2RY2	purinergic receptor P2Y, G-protein coupled, 2	HP2U|P2RU1|P2U|P2U1|P2UR|P2Y2|P2Y2R	11	11q13.5-q14.1
C9orf91		203197	C9orf91	chromosome 9 open reading frame 91	-	9	9q32
TLR7		51284	TLR7	toll-like receptor 7	TLR7-like	X	Xp22.3
SLC25A34		284723	SLC25A34	solute carrier family 25, member 34	-	1	1p36.21
PALMD		54873	PALMD	palmdelphin	C1orf11|PALML	1	1p21.2
RTP4		64108	RTP4	receptor (chemosensory) transporter protein 4	IFRG28|Z3CXXC4	3	3q27.3
SKP2		6502	SKP2	S-phase kinase-associated protein 2, E3 ubiquitin protein ligase	FBL1|FBXL1|FLB1|p45	5	5p13
FRMD7		90167	FRMD7	FERM domain containing 7	NYS|NYS1|XIPAN	X	Xq26.2
EEF1A2		1917	EEF1A2	eukaryotic translation elongation factor 1 alpha 2	EEF1AL|EF-1-alpha-2|EF1A|EIEE33|HS1|MRD38|STN|STNL	20	20q13.3
UNC119		9094	UNC119	unc-119 lipid binding chaperone	HRG4|IMD13|POC7|POC7A	17	17q11.2
KDELR3		11015	KDELR3	KDEL (Lys-Asp-Glu-Leu) endoplasmic reticulum protein retention receptor 3	ERD2L3	22	22q13.1
CCL14		6358	CCL14	chemokine (C-C motif) ligand 14	CC-1|CC-3|CKB1|HCC-1|HCC-1(1-74)|HCC-1/HCC-3|HCC-3|MCIF|NCC-2|NCC2|SCYA14|SCYL2|SY14	17	17q12
EPHA1		2041	EPHA1	EPH receptor A1	EPH|EPHT|EPHT1	7	7q34
PCBP4		57060	PCBP4	poly(rC) binding protein 4	CBP|LIP4|MCG10	3	3p21
SLC7A6OS		84138	SLC7A6OS	solute carrier family 7, member 6 opposite strand	-	16	16q22.1
PTTG1		9232	PTTG1	pituitary tumor-transforming 1	EAP1|HPTTG|PTTG|TUTR1	5	5q35.1
KBTBD3		143879	KBTBD3	kelch repeat and BTB (POZ) domain containing 3	BKLHD3	11	11q22.3
DBP		1628	DBP	D site of albumin promoter (albumin D-box) binding protein	DABP	19	19q13.3
PAQR7		164091	PAQR7	progestin and adipoQ receptor family member VII	MPRA|PGLP|mSR	1	1p36.11
SAMD3		154075	SAMD3	sterile alpha motif domain containing 3	-	6	6q23.1
C14orf80		283643	C14orf80	chromosome 14 open reading frame 80	-	14	14q32.33
ANKRD29		147463	ANKRD29	ankyrin repeat domain 29	-	18	18q11.2
SLC12A1		6557	SLC12A1	solute carrier family 12 (sodium/potassium/chloride transporter), member 1	BSC1|NKCC2	15	15q15-q21.1
ONECUT1		3175	ONECUT1	one cut homeobox 1	HNF-6|HNF6|HNF6A	15	15q21.3
CEBPA		1050	CEBPA	CCAAT/enhancer binding protein (C/EBP), alpha	C/EBP-alpha|CEBP	19	19q13.1
RALGPS1		9649	RALGPS1	Ral GEF with PH domain and SH3 binding motif 1	RALGEF2|RALGPS1A	9	9q33.3
SIRT4		23409	SIRT4	sirtuin 4	SIR2L4	12	12q
FAM13A		10144	FAM13A	family with sequence similarity 13, member A	ARHGAP48|FAM13A1	4	4q22.1
FAM168A		23201	FAM168A	family with sequence similarity 168, member A	KIAA0280|TCRP1	11	11q13.4
C19orf44		84167	C19orf44	chromosome 19 open reading frame 44	-	19	19p13.11
ABCC5		10057	ABCC5	ATP-binding cassette, sub-family C (CFTR/MRP), member 5	ABC33|EST277145|MOAT-C|MOATC|MRP5|SMRP|pABC11	3	3q27
MARVELD3		91862	MARVELD3	MARVEL domain containing 3	MARVD3|MRVLDC3	16	16q22.2
SPC25		57405	SPC25	SPC25, NDC80 kinetochore complex component	AD024|SPBC25|hSpc25	2	2q31.1
AGFG2		3268	AGFG2	ArfGAP with FG repeats 2	HRBL|RABR	7	7q22.1
EDAR		10913	EDAR	ectodysplasin A receptor	DL|ECTD10A|ECTD10B|ED1R|ED3|ED5|EDA-A1R|EDA1R|EDA3|HRM1	2	2q13
BTN3A1		11119	BTN3A1	butyrophilin, subfamily 3, member A1	BT3.1|BTF5|BTN3.1|CD277	6	6p22.1
TLR3		7098	TLR3	toll-like receptor 3	CD283|IIAE2	4	4q35
MND1		84057	MND1	meiotic nuclear divisions 1	GAJ	4	4q31.3
ANKS4B		257629	ANKS4B	ankyrin repeat and sterile alpha motif domain containing 4B	HARP	16	16p12.2
LRRN3		54674	LRRN3	leucine rich repeat neuronal 3	FIGLER5|NLRR-3|NLRR3	7	7q31.1
SPATA18		132671	SPATA18	spermatogenesis associated 18	Mieap|SPETEX1	4	4q12
PDE11A		50940	PDE11A	phosphodiesterase 11A	PPNAD2	2	2q31.2
PMS2		5395	PMS2	PMS1 homolog 2, mismatch repair system component	HNPCC4|MLH4|PMS2CL|PMSL2	7	7p22.2
TNFSF10		8743	TNFSF10	tumor necrosis factor (ligand) superfamily, member 10	APO2L|Apo-2L|CD253|TL2|TRAIL	3	3q26
SPTLC3		55304	SPTLC3	serine palmitoyltransferase, long chain base subunit 3	C20orf38|LCB2B|LCB3|SPT3|SPTLC2L|dJ718P11|dJ718P11.1|hLCB2b	20	20p12.1
C2orf54		79919	C2orf54	chromosome 2 open reading frame 54	-	2	2q37.3
PKIB		5570	PKIB	protein kinase (cAMP-dependent, catalytic) inhibitor beta	PRKACN2	6	6q22.31
NINL		22981	NINL	ninein-like	NLP|dJ691N24.1	20	20p11.22-p11.1
HIST1H2BF		8343	HIST1H2BF	histone cluster 1, H2bf	H2B/g|H2BFG	6	6p22.2
DBNDD1		79007	DBNDD1	dysbindin (dystrobrevin binding protein 1) domain containing 1	-	16	16q24.3
NAGS		162417	NAGS	N-acetylglutamate synthase	AGAS|ARGA	17	17q21.31
TMEM63A		9725	TMEM63A	transmembrane protein 63A	KIAA0792	1	1q42.12
ZMAT3		64393	ZMAT3	zinc finger, matrin-type 3	PAG608|WIG-1|WIG1	3	3q26.32
GPAM		57678	GPAM	glycerol-3-phosphate acyltransferase, mitochondrial	GPAT|GPAT1	10	10q25.2
ELFN1		392617	ELFN1	extracellular leucine-rich repeat and fibronectin type III domain containing 1	PPP1R28	7	7p22.3
CDH15		1013	CDH15	cadherin 15, type 1, M-cadherin (myotubule)	CDH14|CDH3|CDHM|MCAD|MRD3	16	16q24.3
CHRNB1		1140	CHRNB1	cholinergic receptor, nicotinic, beta 1 (muscle)	ACHRB|CHRNB|CMS1D|CMS2A|CMS2C|SCCMS	17	17p13.1
SLC22A7		10864	SLC22A7	solute carrier family 22 (organic anion transporter), member 7	NLT|OAT2	6	6p21.1
ZNF219		51222	ZNF219	zinc finger protein 219	ZFP219	14	14q11
PAQR4		124222	PAQR4	progestin and adipoQ receptor family member IV	-	16	16p13.3
TBX3		6926	TBX3	T-box 3	TBX3-ISO|UMS|XHL	12	12q24.21
PRKCZ		5590	PRKCZ	protein kinase C, zeta	PKC-ZETA|PKC2	1	1p36.33-p36.2
AMOT		154796	AMOT	angiomotin	-	X	Xq23
CNTNAP2		26047	CNTNAP2	contactin associated protein-like 2	AUTS15|CASPR2|CDFE|NRXN4|PTHSL1	7	7q35
PRPF40B		25766	PRPF40B	PRP40 homolog, pre-mRNA processing factor B	HYPC	12	12q13.12
PITPNM2		57605	PITPNM2	phosphatidylinositol transfer protein, membrane-associated 2	NIR-3|NIR3|RDGB2|RDGBA2	12	12q24.31
GIMAP2		26157	GIMAP2	GTPase, IMAP family member 2	HIMAP2|IAN12|IMAP2	7	7q36.1
AMACR		23600	AMACR	alpha-methylacyl-CoA racemase	AMACRD|CBAS4|RACE|RM	5	5p13
OSGIN1		29948	OSGIN1	oxidative stress induced growth inhibitor 1	BDGI|OKL38	16	16q23.3
GSTCD		79807	GSTCD	glutathione S-transferase, C-terminal domain containing	-	4	4q24
CD3G		917	CD3G	CD3g molecule, gamma (CD3-TCR complex)	CD3-GAMMA|IMD17|T3G	11	11q23
FABP4		2167	FABP4	fatty acid binding protein 4, adipocyte	A-FABP|AFABP|ALBP|HEL-S-104|aP2	8	8q21
MTMR4		9110	MTMR4	myotubularin related protein 4	FYVE-DSP2|ZFYVE11	17	17q22
CENPQ		55166	CENPQ	centromere protein Q	C6orf139|CENP-Q	6	6p12.3
GRAP		10750	GRAP	GRB2-related adaptor protein	-	17	17p11.2
ACE2		59272	ACE2	angiotensin I converting enzyme 2	ACEH	X	Xp22
PNPLA3		80339	PNPLA3	patatin-like phospholipase domain containing 3	ADPN|C22orf20|iPLA(2)epsilon	22	22q13.31
KIAA1161		57462	KIAA1161	KIAA1161	NET37	9	9p13.3
CRYAA		1409	CRYAA	crystallin, alpha A	CRYA1|CTRCT9|HSPB4	21	21q22.3
FADS1		3992	FADS1	fatty acid desaturase 1	D5D|FADS6|FADSD5|LLCDL1|TU12	11	11q12.2-q13.1
HIST1H2AC		8334	HIST1H2AC	histone cluster 1, H2ac	H2A/l|H2AFL|dJ221C16.4	6	6p22.1
FANCL		55120	FANCL	Fanconi anemia, complementation group L	FAAP43|PHF9|POG	2	2p16.1
TTC8		123016	TTC8	tetratricopeptide repeat domain 8	BBS8|RP51	14	14q31.3
LRRC31		79782	LRRC31	leucine rich repeat containing 31	HEL-S-293	3	3q26.2
ANXA9		8416	ANXA9	annexin A9	ANX31	1	1q21
AFP		174	AFP	alpha-fetoprotein	AFPD|FETA|HPAFP	4	4q13.3
OAS1		4938	OAS1	2'-5'-oligoadenylate synthetase 1, 40/46kDa	IFI-4|OIAS|OIASI	12	12q24.2
RPL39L		116832	RPL39L	ribosomal protein L39-like	RPL39L1	3	3q27
TMEM45B		120224	TMEM45B	transmembrane protein 45B	-	11	11q24.3
BRCA1		672	BRCA1	breast cancer 1, early onset	BRCAI|BRCC1|BROVCA1|FANCS|IRIS|PNCA4|PPP1R53|PSCP|RNF53	17	17q21
PCDH18		54510	PCDH18	protocadherin 18	PCDH68L	4	4q31
CXCL9		4283	CXCL9	chemokine (C-X-C motif) ligand 9	CMK|Humig|MIG|SCYB9|crg-10	4	4q21
MAMDC4		158056	MAMDC4	MAM domain containing 4	AEGP	9	9q34.3
TMEM98		26022	TMEM98	transmembrane protein 98	TADA1	17	17q11.2
ZNF385B		151126	ZNF385B	zinc finger protein 385B	ZNF533	2	2q31.2-q31.3
ORAI3		93129	ORAI3	ORAI calcium release-activated calcium modulator 3	TMEM142C	16	16p11.2
PIGR		5284	PIGR	polymeric immunoglobulin receptor	-	1	1q31-q41
TRHDE		29953	TRHDE	thyrotropin-releasing hormone degrading enzyme	PAP-II|PGPEP2|TRH-DE	12	12q15-q21
HTR2B		3357	HTR2B	5-hydroxytryptamine (serotonin) receptor 2B, G protein-coupled	5-HT(2B)|5-HT2B	2	2q36.3-q37.1
UBE2T		29089	UBE2T	ubiquitin-conjugating enzyme E2T	FANCT|HSPC150|PIG50	1	1q32.1
FREM2		341640	FREM2	FRAS1 related extracellular matrix protein 2	-	13	13q13.3
TMEM92		162461	TMEM92	transmembrane protein 92	-	17	17q21.33
FCGBP		8857	FCGBP	Fc fragment of IgG binding protein	FC(GAMMA)BP	19	19q13.1
NOL4		8715	NOL4	nucleolar protein 4	CT125|HRIHFB2255|NOLP	18	18q12
SLC16A13		201232	SLC16A13	solute carrier family 16, member 13	MCT13	17	17p13.1
AP1S1		1174	AP1S1	adaptor-related protein complex 1, sigma 1 subunit	AP19|CLAPS1|EKV3|MEDNIK|SIGMA1A	7	7q22.1
GGT1		2678	GGT1	gamma-glutamyltransferase 1	CD224|D22S672|D22S732|GGT|GGT 1|GTG	22	22q11.23
ABCC6		368	ABCC6	ATP-binding cassette, sub-family C (CFTR/MRP), member 6	ABC34|ARA|EST349056|GACI2|MLP1|MOAT-E|MOATE|MRP6|PXE|PXE1|URG7	16	16p13.1
SLC22A11		55867	SLC22A11	solute carrier family 22 (organic anion/urate transporter), member 11	OAT4|hOAT4	11	11q13.1
ANXA13		312	ANXA13	annexin A13	ANX13|ISA	8	8q24.13
FAM124B		79843	FAM124B	family with sequence similarity 124B	-	2	2q36.2
SLC25A42		284439	SLC25A42	solute carrier family 25, member 42	-	19	19p13.11
GCK		2645	GCK	glucokinase (hexokinase 4)	FGQTL3|GK|GLK|HHF3|HK4|HKIV|HXKP|LGLK|MODY2	7	7p15.3-p15.1
CASC5		57082	CASC5	cancer susceptibility candidate 5	AF15Q14|CT29|D40|KNL1|PPP1R55|Spc7|hKNL-1|hSpc105	15	15q14
ABCG8		64241	ABCG8	ATP-binding cassette, sub-family G (WHITE), member 8	GBD4|STSL	2	2p21
RET		5979	RET	ret proto-oncogene	CDHF12|CDHR16|HSCR1|MEN2A|MEN2B|MTC1|PTC|RET-ELE1|RET51	10	10q11.2
SPHK2		56848	SPHK2	sphingosine kinase 2	SK 2|SK-2|SPK 2|SPK-2	19	19q13.2
RNF214		257160	RNF214	ring finger protein 214	-	11	11q23.3
JAKMIP2		9832	JAKMIP2	janus kinase and microtubule interacting protein 2	JAMIP2|NECC1	5	5q32
RBP5		83758	RBP5	retinol binding protein 5, cellular	CRBP-III|CRBP3|CRBPIII	12	12p13.31
TCAP		8557	TCAP	titin-cap	CMD1N|CMH25|LGMD2G|T-cap|TELE|telethonin	17	17q12
UGT1A6		54578	UGT1A6	UDP glucuronosyltransferase 1 family, polypeptide A6	GNT1|HLUGP|HLUGP1|UDPGT|UDPGT 1-6|UGT1|UGT1A6S|UGT1F	2	2q37
NCAPG2		54892	NCAPG2	non-SMC condensin II complex, subunit G2	CAP-G2|CAPG2|LUZP5|MTB|hCAP-G2	7	7q36.3
UBD		10537	UBD	ubiquitin D	FAT10|GABBR1|UBD-3	6	6p21.3
OAS2		4939	OAS2	2'-5'-oligoadenylate synthetase 2, 69/71kDa	-	12	12q24.2
HNF4A		3172	HNF4A	hepatocyte nuclear factor 4, alpha	FRTS4|HNF4|HNF4a7|HNF4a8|HNF4a9|HNF4alpha|MODY|MODY1|NR2A1|NR2A21|TCF|TCF14	20	20q13.12
GPNMB		10457	GPNMB	glycoprotein (transmembrane) nmb	HGFIN|NMB	7	7p15
GOLM1		51280	GOLM1	golgi membrane protein 1	C9orf155|GOLPH2|GP73|HEL46|PSEC0257|bA379P1.3	9	9q21.33
LRIG3		121227	LRIG3	leucine-rich repeats and immunoglobulin-like domains 3	LIG3	12	12q14.1
FADS2		9415	FADS2	fatty acid desaturase 2	D6D|DES6|FADSD6|LLCDL2|SLL0262|TU13	11	11q12.2
CA12		771	CA12	carbonic anhydrase XII	CAXII|HsT18816	15	15q22
PROL1		58503	PROL1	proline rich, lacrimal 1	BPLP|PRL1|opiorphin	4	4q13.3
KIF22		3835	KIF22	kinesin family member 22	A-328A3.2|KID|KNSL4|OBP|OBP-1|OBP-2|SEMDJL2	16	16p11.2
MB		4151	MB	myoglobin	PVALB|myoglobgin	22	22q13.1
DNMT3L		29947	DNMT3L	DNA (cytosine-5-)-methyltransferase 3-like	-	21	21q22.3
TBX15		6913	TBX15	T-box 15	TBX14	1	1p11.1
USP18		11274	USP18	ubiquitin specific peptidase 18	ISG43|UBP43	22	22q11.21
DBI		1622	DBI	diazepam binding inhibitor (GABA receptor modulator, acyl-CoA binding protein)	ACBD1|ACBP|CCK-RP|EP	2	2q12-q21
GNAO1		2775	GNAO1	guanine nucleotide binding protein (G protein), alpha activating activity polypeptide O	EIEE17|G-ALPHA-o|GNAO	16	16q13
ARID3C		138715	ARID3C	AT rich interactive domain 3C (BRIGHT-like)	-	9	9p13.3
SYT7		9066	SYT7	synaptotagmin VII	IPCA-7|IPCA7|PCANAP7|SYT-VII|SYTVII	11	11q12.2
FAM47E		100129583	FAM47E	family with sequence similarity 47, member E	-	4	4q21.1
C2orf82		389084	C2orf82	chromosome 2 open reading frame 82	UNQ830	2	2q37.1
IFI6		2537	IFI6	interferon, alpha-inducible protein 6	6-16|FAM14C|G1P3|IFI-6-16|IFI616	1	1p35
ABHD8		79575	ABHD8	abhydrolase domain containing 8	-	19	19p13.11
C3orf14		57415	C3orf14	chromosome 3 open reading frame 14	HT021	3	3p14.2
ICA1		3382	ICA1	islet cell autoantigen 1, 69kDa	ICA69|ICAp69	7	7p22
ACBD5		91452	ACBD5	acyl-CoA binding domain containing 5	-	10	10p12.1
CHST9		83539	CHST9	carbohydrate (N-acetylgalactosamine 4-0) sulfotransferase 9	GALNAC4ST-2|GalNAc4ST2	18	18q11.2
COL5A3		50509	COL5A3	collagen, type V, alpha 3	-	19	19p13.2
ACSM1		116285	ACSM1	acyl-CoA synthetase medium-chain family member 1	BUCS1|MACS1	16	16p12.3
MRAP		56246	MRAP	melanocortin 2 receptor accessory protein	B27|C21orf61|FALP|FGD2|GCCD2	21	21q22.1
SLC5A12		159963	SLC5A12	solute carrier family 5 (sodium/monocarboxylate cotransporter), member 12	SMCT2	11	11p14.2
C15orf52		388115	C15orf52	chromosome 15 open reading frame 52	-	15	15q15.1
KANK4		163782	KANK4	KN motif and ankyrin repeat domains 4	ANKRD38|dJ1078M7.1	1	1p31.3
DCDC2		51473	DCDC2	doublecortin domain containing 2	DCDC2A|DFNB66|NPHP19|RU2|RU2S	6	6p22.1
IP6K3		117283	IP6K3	inositol hexakisphosphate kinase 3	IHPK3|INSP6K3	6	6p21.31
SHD		56961	SHD	Src homology 2 domain containing transforming protein D	-	19	19p13.3
LRRC19		64922	LRRC19	leucine rich repeat containing 19	-	9	9p21.2
STMN2		11075	STMN2	stathmin 2	SCG10|SCGN10	8	8q21.13
DEFA1		1667	DEFA1	defensin, alpha 1	DEF1|DEFA2|HNP-1|HP-1|HP1|MRS	8	8p23.1
TRPM8		79054	TRPM8	transient receptor potential cation channel, subfamily M, member 8	LTRPC6|TRPP8	2	2q37.1
GADD45B		4616	GADD45B	growth arrest and DNA-damage-inducible, beta	GADD45BETA|MYD118	19	19p13.3
JUNB		3726	JUNB	jun B proto-oncogene	AP-1	19	19p13.2
FOSB		2354	FOSB	FBJ murine osteosarcoma viral oncogene homolog B	AP-1|G0S3|GOS3|GOSB	19	19q13.32
SOCS3		9021	SOCS3	suppressor of cytokine signaling 3	ATOD4|CIS3|Cish3|SOCS-3|SSI-3|SSI3	17	17q25.3
FOS		2353	FOS	FBJ murine osteosarcoma viral oncogene homolog	AP-1|C-FOS|p55	14	14q24.3
MYC		4609	MYC	v-myc avian myelocytomatosis viral oncogene homolog	MRTL|MYCC|bHLHe39|c-Myc	8	8q24.21
PPP1R15A		23645	PPP1R15A	protein phosphatase 1, regulatory subunit 15A	GADD34	19	19q13.2
JUN		3725	JUN	jun proto-oncogene	AP-1|AP1|c-Jun	1	1p32-p31
CEBPD		1052	CEBPD	CCAAT/enhancer binding protein (C/EBP), delta	C/EBP-delta|CELF|CRP3|NF-IL6-beta	8	8p11.2-p11.1
GADD45G		10912	GADD45G	growth arrest and DNA-damage-inducible, gamma	CR6|DDIT2|GADD45gamma|GRP17	9	9q22.1-q22.2
PIM1		5292	PIM1	Pim-1 proto-oncogene, serine/threonine kinase	PIM	6	6p21.2
SOCS2		8835	SOCS2	suppressor of cytokine signaling 2	CIS2|Cish2|SOCS-2|SSI-2|SSI2|STATI2	12	12q
FOSL2		2355	FOSL2	FOS-like antigen 2	FRA2	2	2p23.3
AGPAT9		84803	AGPAT9	1-acylglycerol-3-phosphate O-acyltransferase 9	AGPAT 10|AGPAT8|GPAT3|HMFN0839|LPAAT-theta|MAG1	4	4q21.23
FAM107A		11170	FAM107A	family with sequence similarity 107, member A	DRR1|TU3A	3	3p21.1
PHLDA1		22822	PHLDA1	pleckstrin homology-like domain, family A, member 1	DT1P1B11|PHRIP|TDAG51	12	12q15
CYR61		3491	CYR61	cysteine-rich, angiogenic inducer, 61	CCN1|GIG1|IGFBP10	1	1p22.3
ADAMTS1		9510	ADAMTS1	ADAM metallopeptidase with thrombospondin type 1 motif, 1	C3-C5|METH1	21	21q21.2
PPRC1		23082	PPRC1	peroxisome proliferator-activated receptor gamma, coactivator-related 1	PRC	10	10q24.32
EPHA2		1969	EPHA2	EPH receptor A2	ARCC2|CTPA|CTPP1|CTRCT6|ECK	1	1p36
ATF3		467	ATF3	activating transcription factor 3	-	1	1q32.3
MAP3K8		1326	MAP3K8	mitogen-activated protein kinase kinase kinase 8	AURA2|COT|EST|ESTF|MEKK8|TPL2|Tpl-2|c-COT	10	10p11.23
ARID5B		84159	ARID5B	AT rich interactive domain 5B (MRF1-like)	DESRT|MRF-2|MRF2	10	10q21.2
NFIL3		4783	NFIL3	nuclear factor, interleukin 3 regulated	E4BP4|IL3BP1|NF-IL3A|NFIL3A	9	9q22
KLF11		8462	KLF11	Kruppel-like factor 11	FKLF|FKLF1|MODY7|TIEG2|Tieg3	2	2p25
CCL2		6347	CCL2	chemokine (C-C motif) ligand 2	GDCF-2|HC11|HSMCR30|MCAF|MCP-1|MCP1|SCYA2|SMC-CF	17	17q11.2-q12
HBEGF		1839	HBEGF	heparin-binding EGF-like growth factor	DTR|DTS|DTSF|HEGFL	5	5q23
KLF6		1316	KLF6	Kruppel-like factor 6	BCD1|CBA1|COPEB|CPBP|GBF|PAC1|ST12|ZF9	10	10p15
FILIP1L		11259	FILIP1L	filamin A interacting protein 1-like	DOC-1|DOC1|GIP130|GIP90	3	3q12.1
PELI1		57162	PELI1	pellino E3 ubiquitin protein ligase 1	-	2	2p13.3
PNRC1		10957	PNRC1	proline-rich nuclear receptor coactivator 1	B4-2|PNAS-145|PROL2|PRR2	6	6q15
BCL3		602	BCL3	B-cell CLL/lymphoma 3	BCL4|D19S37	19	19q13.1-q13.2
ITPRIP		85450	ITPRIP	inositol 1,4,5-trisphosphate receptor interacting protein	DANGER|KIAA1754|bA127L20|bA127L20.2	10	10q25.1
ELL		8178	ELL	elongation factor RNA polymerase II	C19orf17|ELL1|MEN|PPP1R68	19	19p13.1
RGS1		5996	RGS1	regulator of G-protein signaling 1	1R20|BL34|HEL-S-87|IER1|IR20	1	1q31
KCNK1		3775	KCNK1	potassium channel, two pore domain subfamily K, member 1	DPK|HOHO|K2P1|K2p1.1|KCNO1|TWIK-1|TWIK1	1	1q42-q43
CDH19		28513	CDH19	cadherin 19, type 2	CDH7|CDH7L2	18	18q22.1
APOLD1		81575	APOLD1	apolipoprotein L domain containing 1	VERGE	12	12p13.1
SERTAD1		29950	SERTAD1	SERTA domain containing 1	SEI1|TRIP-Br1	19	19q13.1-q13.2
RGS2		5997	RGS2	regulator of G-protein signaling 2	G0S8	1	1q31
THBS1		7057	THBS1	thrombospondin 1	THBS|THBS-1|TSP|TSP-1|TSP1	15	15q15
SIK1		150094	SIK1	salt-inducible kinase 1	EIEE30|MSK|SIK|SNF1LK	21	21q22.3
IL4R		3566	IL4R	interleukin 4 receptor	CD124|IL-4RA|IL4RA	16	16p12.1-p11.2
SLITRK3		22865	SLITRK3	SLIT and NTRK-like family, member 3	-	3	3q26.1
IER3		8870	IER3	immediate early response 3	DIF-2|DIF2|GLY96|IEX-1|IEX-1L|IEX1|PRG1	6	6p21.3
BCL6		604	BCL6	B-cell CLL/lymphoma 6	BCL5|BCL6A|LAZ3|ZBTB27|ZNF51	3	3q27
RALGDS		5900	RALGDS	ral guanine nucleotide dissociation stimulator	RGDS|RGF|RalGEF	9	9q34.3
SPRY4		81848	SPRY4	sprouty RTK signaling antagonist 4	HH17	5	5q31.3
ZC3H12A		80149	ZC3H12A	zinc finger CCCH-type containing 12A	MCPIP|MCPIP1|dJ423B22.1	1	1p34.3
BACH2		60468	BACH2	BTB and CNC homology 1, basic leucine zipper transcription factor 2	BTBD25	6	6q15
NR4A1		3164	NR4A1	nuclear receptor subfamily 4, group A, member 1	GFRP1|HMR|N10|NAK-1|NGFIB|NP10|NUR77|TR3	12	12q13
FOXO1		2308	FOXO1	forkhead box O1	FKH1|FKHR|FOXO1A	13	13q14.1
PTGS2		5743	PTGS2	prostaglandin-endoperoxide synthase 2 (prostaglandin G/H synthase and cyclooxygenase)	COX-2|COX2|GRIPGHS|PGG/HS|PGHS-2|PHS-2|hCox-2	1	1q25.2-q25.3
NAMPT		10135	NAMPT	nicotinamide phosphoribosyltransferase	1110035O14Rik|PBEF|PBEF1|VF|VISFATIN	7	7q22.3
ETS2		2114	ETS2	v-ets avian erythroblastosis virus E26 oncogene homolog 2	ETS2IT1	21	21q22.2
P4HA1		5033	P4HA1	prolyl 4-hydroxylase, alpha polypeptide I	P4HA	10	10q22.1
ETNK1		55500	ETNK1	ethanolamine kinase 1	EKI|EKI 1|EKI1|Nbla10396	12	12p12.1
PLAUR		5329	PLAUR	plasminogen activator, urokinase receptor	CD87|U-PAR|UPAR|URKR	19	19q13
C10orf10		11067	C10orf10	chromosome 10 open reading frame 10	DEPP|FIG|Fseg	10	10q11.21
EGR1		1958	EGR1	early growth response 1	AT225|G0S30|KROX-24|NGFI-A|TIS8|ZIF-268|ZNF225	5	5q31.1
S100P		6286	S100P	S100 calcium binding protein P	MIG9	4	4p16
IL6		3569	IL6	interleukin 6	BSF2|HGF|HSF|IFNB2|IL-6	7	7p21
FOSL1		8061	FOSL1	FOS-like antigen 1	FRA|FRA1|fra-1	11	11q13
PFKFB3		5209	PFKFB3	6-phosphofructo-2-kinase/fructose-2,6-biphosphatase 3	IPFK2|PFK2	10	10p15.1
VNN3		55350	VNN3	vanin 3	HSA238982	6	6q23.2
CRISPLD2		83716	CRISPLD2	cysteine-rich secretory protein LCCL domain containing 2	CRISP11|LCRISP2	16	16q24.1
HIVEP1		3096	HIVEP1	human immunodeficiency virus type I enhancer binding protein 1	CIRIP|CRYBP1|GAAP|MBP-1|PRDII-BF1|Schnurri-1|ZAS1|ZNF40|ZNF40A	6	6p24-p22.3
ZFP36		7538	ZFP36	ZFP36 ring finger protein	G0S24|GOS24|NUP475|RNF162A|TIS11|TTP|zfp-36	19	19q13.1
CISH		1154	CISH	cytokine inducible SH2-containing protein	BACTS2|CIS|CIS-1|G18|SOCS	3	3p21.3
C17orf96		100170841	C17orf96	chromosome 17 open reading frame 96	PRR28	17	17q12
SLC2A3		6515	SLC2A3	solute carrier family 2 (facilitated glucose transporter), member 3	GLUT3	12	12p13.3
ZNF331		55422	ZNF331	zinc finger protein 331	RITA|ZNF361|ZNF463	19	19q13.42
SDC4		6385	SDC4	syndecan 4	SYND4	20	20q12
EMP1		2012	EMP1	epithelial membrane protein 1	CL-20|EMP-1|TMP	12	12p12.3
SIPA1L2		57568	SIPA1L2	signal-induced proliferation-associated 1 like 2	SPAL2	1	1q42.2
IL1RL1		9173	IL1RL1	interleukin 1 receptor-like 1	DER4|FIT-1|IL33R|ST2|ST2L|ST2V|T1	2	2q12
UPP1		7378	UPP1	uridine phosphorylase 1	UDRPASE|UP|UPASE|UPP	7	7p12.3
MAFF		23764	MAFF	v-maf avian musculoaponeurotic fibrosarcoma oncogene homolog F	U-MAF|hMafF	22	22q13.1
IGFBP1		3484	IGFBP1	insulin-like growth factor binding protein 1	AFBP|IBP1|IGF-BP25|PP12|hIGFBP-1	7	7p12.3
TNFRSF1A		7132	TNFRSF1A	tumor necrosis factor receptor superfamily, member 1A	CD120a|FPF|MS5|TBP1|TNF-R|TNF-R-I|TNF-R55|TNFAR|TNFR1|TNFR1-d2|TNFR55|TNFR60|p55|p55-R|p60	12	12p13.2
TRIM15		89870	TRIM15	tripartite motif containing 15	RNF93|ZNF178|ZNFB7	6	6p21.3
PADI4		23569	PADI4	peptidyl arginine deiminase, type IV	PAD|PAD4|PADI5|PDI4|PDI5	1	1p36.13
THBD		7056	THBD	thrombomodulin	AHUS6|BDCA3|CD141|THPH12|THRM|TM	20	20p11.2
HAS2		3037	HAS2	hyaluronan synthase 2	-	8	8q24.12
IVNS1ABP		10625	IVNS1ABP	influenza virus NS1A binding protein	FLARA3|HSPC068|KLHL39|ND1|NS-1|NS1-BP|NS1BP	1	1q25.1-q31.1
FGF14		2259	FGF14	fibroblast growth factor 14	FGF-14|FHF-4|FHF4|SCA27	13	13q34
IRAK3		11213	IRAK3	interleukin-1 receptor-associated kinase 3	ASRT5|IRAKM	12	12q14.3
GPRC5A		9052	GPRC5A	G protein-coupled receptor, class C, group 5, member A	GPCR5A|PEIG-1|RAI3|RAIG1|TIG1	12	12p13.1
KLF5		688	KLF5	Kruppel-like factor 5 (intestinal)	BTEB2|CKLF|IKLF	13	13q22.1
RBPMS		11030	RBPMS	RNA binding protein with multiple splicing	HERMES	8	8p12
PROK2		60675	PROK2	prokineticin 2	BV8|HH4|KAL4|MIT1|PK2	3	3p13
KIAA0040		9674	KIAA0040	KIAA0040	-	1	1q25.1
CLCF1		23529	CLCF1	cardiotrophin-like cytokine factor 1	BSF-3|BSF3|CISS2|CLC|NNT-1|NNT1|NR6	11	11q13.3
CREB5		9586	CREB5	cAMP responsive element binding protein 5	CRE-BPA|CREB-5	7	7p15.1
EGR3		1960	EGR3	early growth response 3	EGR-3|PILOT	8	8p23-p21
SOCS1		8651	SOCS1	suppressor of cytokine signaling 1	CIS1|CISH1|JAB|SOCS-1|SSI-1|SSI1|TIP3	16	16p13.13
RRS1		23212	RRS1	RRS1 ribosome biogenesis regulator homolog (S. cerevisiae)	-	8	8q13.1
PIM3		415116	PIM3	Pim-3 proto-oncogene, serine/threonine kinase	pim-3	22	22q13
LARP1B		55132	LARP1B	La ribonucleoprotein domain family, member 1B	LARP2	4	4q28.2
LYST		1130	LYST	lysosomal trafficking regulator	CHS|CHS1	1	1q42.1-q42.2
KLF4		9314	KLF4	Kruppel-like factor 4 (gut)	EZF|GKLF	9	9q31
IL1B		3553	IL1B	interleukin 1, beta	IL-1|IL1-BETA|IL1F2	2	2q14
NFE2		4778	NFE2	nuclear factor, erythroid 2	NF-E2|p45	12	12q13
C5AR1		728	C5AR1	complement component 5a receptor 1	C5A|C5AR|C5R1|CD88	19	19q13.3-q13.4
FPR1		2357	FPR1	formyl peptide receptor 1	FMLP|FPR	19	19q13.4
NR4A3		8013	NR4A3	nuclear receptor subfamily 4, group A, member 3	CHN|CSMF|MINOR|NOR1|TEC	9	9q22
CDC42EP3		10602	CDC42EP3	CDC42 effector protein (Rho GTPase binding) 3	BORG2|CEP3|UB1	2	2p21
NR4A2		4929	NR4A2	nuclear receptor subfamily 4, group A, member 2	HZF-3|NOT|NURR1|RNR1|TINUR	2	2q22-q23
RASL10A		10633	RASL10A	RAS-like, family 10, member A	RRP22	22	22q12.2
MYADM		91663	MYADM	myeloid-associated differentiation marker	SB135	19	19q13.42
FYTTD1		84248	FYTTD1	forty-two-three domain containing 1	UIF	3	3q29
MBNL2		10150	MBNL2	muscleblind-like splicing regulator 2	MBLL|MBLL39|PRO2032	13	13q32.1
RND1		27289	RND1	Rho family GTPase 1	ARHS|RHO6|RHOS	12	12q12
ARL14		80117	ARL14	ADP-ribosylation factor-like 14	ARF7	3	3q25.33
TUBB6		84617	TUBB6	tubulin, beta 6 class V	HsT1601|TUBB-5	18	18p11.21
RAB27A		5873	RAB27A	RAB27A, member RAS oncogene family	GS2|HsT18676|RAB27|RAM	15	15q15-q21.1
MIDN		90007	MIDN	midnolin	-	19	19p13.3
CALCA		796	CALCA	calcitonin-related polypeptide alpha	CALC1|CGRP|CGRP-I|CGRP1|CT|KC	11	11p15.2
CASP4		837	CASP4	caspase 4, apoptosis-related cysteine peptidase	ICE(rel)II|ICEREL-II|ICH-2|Mih1/TX|TX	11	11q22.2-q22.3
SERPINE1		5054	SERPINE1	serpin peptidase inhibitor, clade E (nexin, plasminogen activator inhibitor type 1), member 1	PAI|PAI-1|PAI1|PLANH1	7	7q22.1
MT1A		4489	MT1A	metallothionein 1A	MT1|MT1S|MTC	16	16q13
NR5A2		2494	NR5A2	nuclear receptor subfamily 5, group A, member 2	B1F|B1F2|CPF|FTF|FTZ-F1|FTZ-F1beta|LRH-1|LRH1|hB1F-2	1	1q32.1
ATP2B4		493	ATP2B4	ATPase, Ca++ transporting, plasma membrane 4	ATP2B2|MXRA1|PMCA4|PMCA4b|PMCA4x	1	1q32.1
ACTG2		72	ACTG2	actin, gamma 2, smooth muscle, enteric	ACT|ACTA3|ACTE|ACTL3|ACTSG|VSCM	2	2p13.1
S100A12		6283	S100A12	S100 calcium binding protein A12	CAAF1|CAGC|CGRP|ENRAGE|MRP-6|MRP6|p6	1	1q21
C2CD4B		388125	C2CD4B	C2 calcium-dependent domain containing 4B	FAM148B|NLF2	15	15q22.2
SLC11A1		6556	SLC11A1	solute carrier family 11 (proton-coupled divalent metal ion transporter), member 1	LSH|NRAMP|NRAMP1	2	2q35
PTGER2		5732	PTGER2	prostaglandin E receptor 2 (subtype EP2), 53kDa	EP2	14	14q22
IGFBP2		3485	IGFBP2	insulin-like growth factor binding protein 2, 36kDa	IBP2|IGF-BP53	2	2q35
IL10		3586	IL10	interleukin 10	CSIF|GVHDS|IL-10|IL10A|TGIF	1	1q31-q32
ELF3		1999	ELF3	E74-like factor 3 (ets domain transcription factor, epithelial-specific )	EPR-1|ERT|ESE-1|ESX	1	1q32.2
SLC22A4		6583	SLC22A4	solute carrier family 22 (organic cation/zwitterion transporter), member 4	OCTN1	5	5q31.1
IL1RN		3557	IL1RN	interleukin 1 receptor antagonist	DIRA|ICIL-1RA|IL-1RN|IL-1ra|IL-1ra3|IL1F3|IL1RA|IRAP|MVCD4	2	2q14.2
FOXC1		2296	FOXC1	forkhead box C1	ARA|FKHL7|FREAC-3|FREAC3|IGDA|IHG1|IRID1|RIEG3	6	6p25
GJA1		2697	GJA1	gap junction protein, alpha 1, 43kDa	AVSD3|CMDR|CX43|EKVP|GJAL|HLHS1|HSS|ODDD	6	6q22.31
NCOA7		135112	NCOA7	nuclear receptor coactivator 7	ERAP140|ESNA1|NCOA7-AS|Nbla00052|Nbla10993|TLDC4|dJ187J11.3	6	6q22.32
HDC		3067	HDC	histidine decarboxylase	-	15	15q21.2
PPAN		56342	PPAN	peter pan homolog (Drosophila)	BXDC3|SSF|SSF-1|SSF1|SSF2	19	19p13
ZNF878		729747	ZNF878	zinc finger protein 878	-	19	19p13.2
ERN1		2081	ERN1	endoplasmic reticulum to nucleus signaling 1	IRE1|IRE1P|IRE1a|hIRE1p	17	17q24.2
FCAR		2204	FCAR	Fc fragment of IgA receptor	CD89|CTB-61M7.2|FcalphaRI	19	19q13.42
TNFSF14		8740	TNFSF14	tumor necrosis factor (ligand) superfamily, member 14	CD258|HVEML|LIGHT|LTg|TR2	19	19p13.3
SPSB1		80176	SPSB1	splA/ryanodine receptor domain and SOCS box containing 1	SSB-1|SSB1	1	1p36.22
MMP19		4327	MMP19	matrix metallopeptidase 19	MMP18|RASI-1	12	12q14
IL18RAP		8807	IL18RAP	interleukin 18 receptor accessory protein	ACPL|CD218b|CDw218b|IL-18R-beta|IL-18RAcP|IL-18Rbeta|IL-1R-7|IL-1R7|IL-1RAcPL|IL18RB	2	2q12
LPAR1		1902	LPAR1	lysophosphatidic acid receptor 1	EDG2|GPR26|Gpcr26|LPA1|Mrec1.3|VZG1|edg-2|rec.1.3|vzg-1	9	9q31.3
RRP12		23223	RRP12	ribosomal RNA processing 12 homolog (S. cerevisiae)	KIAA0690	10	10q24.1
NFKBIZ		64332	NFKBIZ	nuclear factor of kappa light polypeptide gene enhancer in B-cells inhibitor, zeta	IKBZ|INAP|MAIL	3	3p12-q12
FPR2		2358	FPR2	formyl peptide receptor 2	ALXR|FMLP-R-II|FMLPX|FPR2A|FPRH1|FPRH2|FPRL1|HM63|LXA4R	19	19q13.3-q13.4
URB2		9816	URB2	URB2 ribosome biogenesis 2 homolog (S. cerevisiae)	KIAA0133|NET10|NPA2	1	1q42.13
ADAM19		8728	ADAM19	ADAM metallopeptidase domain 19	FKSG34|MADDAM|MLTNB	5	5q33.3
DHODH		1723	DHODH	dihydroorotate dehydrogenase (quinone)	DHOdehase|POADS|URA1	16	16q22
NBL1		4681	NBL1	neuroblastoma 1, DAN family BMP antagonist	D1S1733E|DAN|DAND1|NB|NO3	1	1p36.13
CDH23		64072	CDH23	cadherin-related 23	CDHR23|USH1D	10	10q22.1
STC1		6781	STC1	stanniocalcin 1	STC	8	8p21.2
TGFB3		7043	TGFB3	transforming growth factor, beta 3	ARVD|ARVD1|RNHF|TGF-beta3	14	14q24
NFKB2		4791	NFKB2	nuclear factor of kappa light polypeptide gene enhancer in B-cells 2 (p49/p100)	CVID10|H2TF1|LYT-10|LYT10|NF-kB2|p100|p52	10	10q24
IER5L		389792	IER5L	immediate early response 5-like	bA247A12.2	9	9q34.11
CMTM2		146225	CMTM2	CKLF-like MARVEL transmembrane domain containing 2	CKLFSF2	16	16q21
SERPINB9		5272	SERPINB9	serpin peptidase inhibitor, clade B (ovalbumin), member 9	CAP-3|CAP3|PI-9|PI9	6	6p25
PVR		5817	PVR	poliovirus receptor	CD155|HVED|NECL5|Necl-5|PVS|TAGE4	19	19q13.2
GRAMD4		23151	GRAMD4	GRAM domain containing 4	DIP|dA59H18.1|dJ439F8.1	22	22q13.31
SYNE2		23224	SYNE2	spectrin repeat containing, nuclear envelope 2	EDMD5|NUA|NUANCE|Nesp2|Nesprin-2|SYNE-2|TROPH	14	14q23.2
LONRF2		164832	LONRF2	LON peptidase N-terminal domain and ring finger 2	RNF192	2	2q11.2
VNN2		8875	VNN2	vanin 2	FOAP-4|GPI-80	6	6q23-q24
TGM2		7052	TGM2	transglutaminase 2	G-ALPHA-h|GNAH|HEL-S-45|TG2|TGC	20	20q12
TNFRSF10D		8793	TNFRSF10D	tumor necrosis factor receptor superfamily, member 10d, decoy with truncated death domain	CD264|DCR2|TRAIL-R4|TRAILR4|TRUNDD	8	8p21
LIF		3976	LIF	leukemia inhibitory factor	CDF|DIA|HILDA|MLPLI	22	22q12.2
SLC7A2		6542	SLC7A2	solute carrier family 7 (cationic amino acid transporter, y+ system), member 2	ATRC2|CAT2|HCAT2	8	8p22
MYBPH		4608	MYBPH	myosin binding protein H	-	1	1q32.1
ODF3L1		161753	ODF3L1	outer dense fiber of sperm tails 3-like 1	-	15	15q24.2
TNFRSF12A		51330	TNFRSF12A	tumor necrosis factor receptor superfamily, member 12A	CD266|FN14|TWEAKR	16	16p13.3
CDKN1A		1026	CDKN1A	cyclin-dependent kinase inhibitor 1A (p21, Cip1)	CAP20|CDKN1|CIP1|MDA-6|P21|SDI1|WAF1|p21CIP1	6	6p21.2
DUSP10		11221	DUSP10	dual specificity phosphatase 10	MKP-5|MKP5	1	1q41
ANGPTL4		51129	ANGPTL4	angiopoietin-like 4	ANGPTL2|ARP4|FIAF|HARP|HFARP|NL2|PGAR|TGQTL|UNQ171|pp1158	19	19p13.3
AKAP12		9590	AKAP12	A kinase (PRKA) anchor protein 12	AKAP250|SSeCKS	6	6q24-q25
RASD1		51655	RASD1	RAS, dexamethasone-induced 1	AGS1|DEXRAS1|MGC:26290	17	17p11.2
GFPT2		9945	GFPT2	glutamine-fructose-6-phosphate transaminase 2	GFAT2	5	5q34-q35
AVPR1A		552	AVPR1A	arginine vasopressin receptor 1A	AVPR V1a|AVPR1|V1aR	12	12q14-q15
TMEM233		387890	TMEM233	transmembrane protein 233	DSPB2|IFITMD2	12	12q24.23
SLCO1A2		6579	SLCO1A2	solute carrier organic anion transporter family, member 1A2	OATP|OATP-A|OATP1A2|SLC21A3	12	12p12
MAP3K14		9020	MAP3K14	mitogen-activated protein kinase kinase kinase 14	FTDCR1B|HS|HSNIK|NIK	17	17q21
GRHL1		29841	GRHL1	grainyhead-like 1 (Drosophila)	LBP32|MGR|NH32|TFCP2L2	2	2p25.1
GPM6B		2824	GPM6B	glycoprotein M6B	M6B	X	Xp22.2
CHI3L1		1116	CHI3L1	chitinase 3-like 1 (cartilage glycoprotein-39)	ASRT7|CGP-39|GP-39|GP39|HC-gp39|HCGP-3P|YKL-40|YKL40|YYL-40|hCGP-39	1	1q32.1
TNFAIP6		7130	TNFAIP6	tumor necrosis factor, alpha-induced protein 6	TSG-6|TSG6	2	2q23.3
BAZ1A		11177	BAZ1A	bromodomain adjacent to zinc finger domain, 1A	ACF1|WALp1|WCRF180|hACF1	14	14q13.2
MMP25		64386	MMP25	matrix metallopeptidase 25	MMP-25|MMP20|MMP20A|MMPL1|MT-MMP 6|MT-MMP6|MT6-MMP|MT6MMP|MTMMP6	16	16p13.3
MLF1		4291	MLF1	myeloid leukemia factor 1	-	3	3q25.1
BATF3		55509	BATF3	basic leucine zipper transcription factor, ATF-like 3	JDP1|JUNDM1|SNFT	1	1q32.3
GEM		2669	GEM	GTP binding protein overexpressed in skeletal muscle	KIR	8	8q13-q21
XKR4		114786	XKR4	XK, Kell blood group complex subunit-related family, member 4	XRG4	8	8q12.1
ITLN2		142683	ITLN2	intelectin 2	HL-2|HL2	1	1q22-q23
S100A8		6279	S100A8	S100 calcium binding protein A8	60B8AG|CAGA|CFAG|CGLA|CP-10|L1Ag|MA387|MIF|MRP8|NIF|P8	1	1q21
EIF5		1983	EIF5	eukaryotic translation initiation factor 5	EIF-5|EIF-5A	14	14q32.32
TEAD4		7004	TEAD4	TEA domain family member 4	EFTR-2|RTEF1|TCF13L1|TEF-3|TEF3|TEFR-1|hRTEF-1B	12	12p13.3-p13.2
ADAMTS4		9507	ADAMTS4	ADAM metallopeptidase with thrombospondin type 1 motif, 4	ADAMTS-2|ADAMTS-4|ADMP-1	1	1q21-q23
TAGLN		6876	TAGLN	transgelin	SM22|SMCC|TAGLN1|WS3-10	11	11q23.2
TNFAIP8L3		388121	TNFAIP8L3	tumor necrosis factor, alpha-induced protein 8-like 3	TIPE3	15	15q21.2
MTHFD2		10797	MTHFD2	methylenetetrahydrofolate dehydrogenase (NADP+ dependent) 2, methenyltetrahydrofolate cyclohydrolase	NMDMC	2	2p13.1
PTX3		5806	PTX3	pentraxin 3, long	TNFAIP5|TSG-14	3	3q25
SERPINA1		5265	SERPINA1	serpin peptidase inhibitor, clade A (alpha-1 antiproteinase, antitrypsin), member 1	A1A|A1AT|AAT|PI|PI1|PRO2275|alpha1AT	14	14q32.1
CSF3		1440	CSF3	colony stimulating factor 3 (granulocyte)	C17orf33|CSF3OS|GCSF	17	17q11.2-q12
GPR3		2827	GPR3	G protein-coupled receptor 3	ACCA	1	1p36.1-p35
MCAM		4162	MCAM	melanoma cell adhesion molecule	CD146|MUC18	11	11q23.3
SOX17		64321	SOX17	SRY (sex determining region Y)-box 17	VUR3	8	8q11.23
CNN1		1264	CNN1	calponin 1, basic, smooth muscle	HEL-S-14|SMCC|Sm-Calp	19	19p13.2-p13.1
FRMD6		122786	FRMD6	FERM domain containing 6	C14orf31|EX1|Willin|c14_5320	14	14q22.1
BIRC3		330	BIRC3	baculoviral IAP repeat containing 3	AIP1|API2|CIAP2|HAIP1|HIAP1|MALT2|MIHC|RNF49|c-IAP2	11	11q22
LIPN		643418	LIPN	lipase, family member N	ARCI8|LI4|LIPL4|bA186O14.3	10	10q23.31
KCNE4		23704	KCNE4	potassium channel, voltage gated subfamily E regulatory beta subunit 4	MIRP3	2	2q36.1
MYH11		4629	MYH11	myosin, heavy chain 11, smooth muscle	AAT4|FAA4|SMHC|SMMHC	16	16p13.11
TIPARP		25976	TIPARP	TCDD-inducible poly(ADP-ribose) polymerase	ARTD14|PARP7|pART14	3	3q25.31
OSM		5008	OSM	oncostatin M	-	22	22q12.2
CD274		29126	CD274	CD274 molecule	B7-H|B7H1|PD-L1|PDCD1L1|PDCD1LG1|PDL1	9	9p24
SBNO2		22904	SBNO2	strawberry notch homolog 2 (Drosophila)	KIAA0963|SNO|STNO	19	19p13.3
TMPRSS2		7113	TMPRSS2	transmembrane protease, serine 2	PP9284|PRSS10	21	21q22.3
RAC1		5879	RAC1	ras-related C3 botulinum toxin substrate 1 (rho family, small GTP binding protein Rac1)	MIG5|Rac-1|TC-25|p21-Rac1	7	7p22
SLC7A1		6541	SLC7A1	solute carrier family 7 (cationic amino acid transporter, y+ system), member 1	ATRC1|CAT-1|ERR|HCAT1|REC1L	13	13q12.3
PMP22		5376	PMP22	peripheral myelin protein 22	CMT1A|CMT1E|DSS|GAS-3|HMSNIA|HNPP|Sp110	17	17p12
FJX1		24147	FJX1	four jointed box 1	-	11	11p13
ALDH1A3		220	ALDH1A3	aldehyde dehydrogenase 1 family, member A3	ALDH1A6|ALDH6|MCOP8|RALDH3	15	15q26.3
APOBEC3A		200315	APOBEC3A	apolipoprotein B mRNA editing enzyme, catalytic polypeptide-like 3A	A3A|ARP3|PHRBN|bK150C2.1	22	22q13.1-q13.2
PDLIM3		27295	PDLIM3	PDZ and LIM domain 3	ALP	4	4q35
OXCT2		64064	OXCT2	3-oxoacid CoA transferase 2	FKSG25|SCOTT	1	1p34
CCL3		6348	CCL3	chemokine (C-C motif) ligand 3	G0S19-1|LD78ALPHA|MIP-1-alpha|MIP1A|SCYA3	17	17q12
RAX2		84839	RAX2	retina and anterior neural fold homeobox 2	ARMD6|CORD11|QRX|RAXL1	19	19p13.3
FAM169B		283777	FAM169B	family with sequence similarity 169, member B	-	15	15q26.3
EFHD1		80303	EFHD1	EF-hand domain family, member D1	MST133|MSTP133|PP3051|SWS2	2	2q37.1
MAK		4117	MAK	male germ cell-associated kinase	RP62|dJ417M14.2	6	6p24
VCAN		1462	VCAN	versican	CSPG2|ERVR|GHAP|PG-M|WGN|WGN1	5	5q14.3
NRG1		3084	NRG1	neuregulin 1	ARIA|GGF|GGF2|HGL|HRG|HRG1|HRGA|MST131|MSTP131|NDF|NRG1-IT2|SMDF	8	8p12
IRS2		8660	IRS2	insulin receptor substrate 2	IRS-2	13	13q34
RGS16		6004	RGS16	regulator of G-protein signaling 16	A28-RGS14|A28-RGS14P|RGS-R	1	1q25-q31
IRF1		3659	IRF1	interferon regulatory factor 1	IRF-1|MAR	5	5q31.1
PAPPA		5069	PAPPA	pregnancy-associated plasma protein A, pappalysin 1	ASBABP2|DIPLA1|IGFBP-4ase|PAPA|PAPP-A|PAPPA1	9	9q33.2
ROM1		6094	ROM1	retinal outer segment membrane protein 1	ROM|ROSP1|RP7|TSPAN23	11	11q13
CIT		11113	CIT	citron rho-interacting serine/threonine kinase	CRIK|STK21	12	12q24
RFX2		5990	RFX2	regulatory factor X, 2 (influences HLA class II expression)	-	19	19p13.3
MTUS1		57509	MTUS1	microtubule associated tumor suppressor 1	ATBP|ATIP|ICIS|MP44|MTSG1	8	8p22
C2CD4A		145741	C2CD4A	C2 calcium-dependent domain containing 4A	FAM148A|NLF1	15	15q22.2
MT1B		4490	MT1B	metallothionein 1B	MT1|MT1Q|MTP	16	16q13
SORCS1		114815	SORCS1	sortilin-related VPS10 domain containing receptor 1	hSorCS	10	10q23-q25
SERPINB2		5055	SERPINB2	serpin peptidase inhibitor, clade B (ovalbumin), member 2	HsT1201|PAI|PAI-2|PAI2|PLANH2	18	18q21.3
DHRS13		147015	DHRS13	dehydrogenase/reductase (SDR family) member 13	SDR7C5	17	17q11.2
IL24		11009	IL24	interleukin 24	C49A|FISP|IL10B|MDA7|MOB5|ST16	1	1q32
BCL2A1		597	BCL2A1	BCL2-related protein A1	ACC-1|ACC-2|ACC1|ACC2|BCL2L5|BFL1|GRS|HBPA1	15	15q24.3
FLNC		2318	FLNC	filamin C, gamma	ABP-280|ABP280A|ABPA|ABPL|FLN2|MFM5|MPD4	7	7q32-q35
RPGR		6103	RPGR	retinitis pigmentosa GTPase regulator	COD1|CORDX1|CRD|PCDX|RP15|RP3|XLRP3|orf15	X	Xp21.1
LAMC2		3918	LAMC2	laminin, gamma 2	B2T|BM600|CSF|EBR2|EBR2A|LAMB2T|LAMNB2	1	1q25-q31
SEMA4B		10509	SEMA4B	sema domain, immunoglobulin domain (Ig), transmembrane domain (TM) and short cytoplasmic domain, (semaphorin) 4B	SEMAC|SemC	15	15q25
DAND5		199699	DAND5	DAN domain family member 5, BMP antagonist	CER2|CERL2|CKTSF1B3|COCO|CRL2|DANTE|GREM3|SP1	19	19p13.2
VIL1		7429	VIL1	villin 1	D2S1471|VIL	2	2q35
MAPK4		5596	MAPK4	mitogen-activated protein kinase 4	ERK-4|ERK4|PRKM4|p63-MAPK|p63MAPK	18	18q21.1
SAA1		6288	SAA1	serum amyloid A1	PIG4|SAA|SAA2|TP53I4	11	11p15.1
CCL20		6364	CCL20	chemokine (C-C motif) ligand 20	CKb4|Exodus|LARC|MIP-3-alpha|MIP-3a|MIP3A|SCYA20|ST38	2	2q36.3
CH25H		9023	CH25H	cholesterol 25-hydroxylase	C25H	10	10q23
RCAN1		1827	RCAN1	regulator of calcineurin 1	ADAPT78|CSP1|DSC1|DSCR1|MCIP1|RCN1	21	21q22.12
PRRX1		5396	PRRX1	paired related homeobox 1	AGOTC|PHOX1|PMX1|PRX-1|PRX1	1	1q24
GFRA3		2676	GFRA3	GDNF family receptor alpha 3	GDNFR3	5	5q31.1-q31.3
MIOX		55586	MIOX	myo-inositol oxygenase	ALDRL6	22	22q13.3
DEFB118		117285	DEFB118	defensin, beta 118	C20orf63|DEFB-18|ESC42|ESP13.6	20	20q11.21
SBK2		646643	SBK2	SH3 domain binding kinase family, member 2	SGK069	19	19q13.42
OR4F5		79501	OR4F5	olfactory receptor, family 4, subfamily F, member 5	-	1	1p36.33
GAGE2B		645037	GAGE2B	G antigen 2B	CT4.2|GAGE-2|GAGE-2B	X	Xp11.23
HLA-C		3107	HLA-C	major histocompatibility complex, class I, C	D6S204|HLA-JY3|HLC-C|PSORS1	6	6p21.3
GAGE12C		729422	GAGE12C	G antigen 12C	GAGE-12B	X	Xp11.23
OR4F21		441308	OR4F21	olfactory receptor, family 4, subfamily F, member 21	OR4F21P	8	8p23.3
GAGE4		2576	GAGE4	G antigen 4	CT4.4	X	Xp11.4-p11.2
GAGE5		2577	GAGE5	G antigen 5	CT4.5	X	Xp11.4-p11.2
ABCD3		5825	ABCD3	ATP-binding cassette, sub-family D (ALD), member 3	ABC43|CBAS5|PMP70|PXMP1|ZWS2	1	1p21.3
ABLIM1		3983	ABLIM1	actin binding LIM protein 1	ABLIM|LIMAB1|LIMATIN|abLIM-1	10	10q25
ACKR3		57007	ACKR3	atypical chemokine receptor 3	CMKOR1|CXC-R7|CXCR-7|CXCR7|GPR159|RDC-1|RDC1	2	2q37.3
ALOX5AP		241	ALOX5AP	arachidonate 5-lipoxygenase-activating protein	FLAP	13	13q12
AMD1		262	AMD1	adenosylmethionine decarboxylase 1	ADOMETDC|AMD|SAMDC	6	6q21
ANKRD37		353322	ANKRD37	ankyrin repeat domain 37	Lrp2bp	4	4q35.1
ANP32E		81611	ANP32E	acidic (leucine-rich) nuclear phosphoprotein 32 family, member E	LANP-L|LANPL	1	1q21.2
ARAP2		116984	ARAP2	ArfGAP with RhoGAP domain, ankyrin repeat and PH domain 2	CENTD1|PARX	4	4p14
ARNTL2		56938	ARNTL2	aryl hydrocarbon receptor nuclear translocator-like 2	BMAL2|CLIF|MOP9|PASD9|bHLHe6	12	12p12.2-p11.2
BBOX1		8424	BBOX1	butyrobetaine (gamma), 2-oxoglutarate dioxygenase (gamma-butyrobetaine hydroxylase) 1	BBH|BBOX|G-BBH|gamma-BBH	11	11p14.2
BHLHE40		8553	BHLHE40	basic helix-loop-helix family, member e40	BHLHB2|DEC1|HLHB2|SHARP-2|STRA13|Stra14	3	3p26
CASP7		840	CASP7	caspase 7, apoptosis-related cysteine peptidase	CASP-7|CMH-1|ICE-LAP3|LICE2|MCH3	10	10q25
CCDC71L		168455	CCDC71L	coiled-coil domain containing 71-like	C7orf74	7	7q22.3
CCR1		1230	CCR1	chemokine (C-C motif) receptor 1	CD191|CKR-1|CKR1|CMKBR1|HM145|MIP1aR|SCYAR1	3	3p21
CD44		960	CD44	CD44 molecule (Indian blood group)	CDW44|CSPG8|ECMR-III|HCELL|HUTCH-I|IN|LHR|MC56|MDU2|MDU3|MIC4|Pgp1	11	11p13
CLDN1		9076	CLDN1	claudin 1	CLD1|ILVASC|SEMP1	3	3q28-q29
CLEC7A		64581	CLEC7A	C-type lectin domain family 7, member A	BGR|CANDF4|CD369|CLECSF12|DECTIN1	12	12p13.2
COL1A1		1277	COL1A1	collagen, type I, alpha 1	EDSC|OI1|OI2|OI3|OI4	17	17q21.33
COL1A2		1278	COL1A2	collagen, type I, alpha 2	OI4	7	7q22.1
CSF2RB		1439	CSF2RB	colony stimulating factor 2 receptor, beta, low-affinity (granulocyte-macrophage)	CD131|CDw131|IL3RB|IL5RB|SMDP5	22	22q13.1
CTSS		1520	CTSS	cathepsin S	-	1	1q21
CXCR2		3579	CXCR2	chemokine (C-X-C motif) receptor 2	CD182|CDw128b|CMKAR2|IL8R2|IL8RA|IL8RB	2	2q35
DDX21		9188	DDX21	DEAD (Asp-Glu-Ala-Asp) box helicase 21	GUA|GURDB|RH-II/GU|RH-II/GuA	10	10q21
DEFA1B		728358	DEFA1B	defensin, alpha 1B	HNP-1|HP-1|HP1	8	8p23.1
DEFA3		1668	DEFA3	defensin, alpha 3, neutrophil-specific	DEF3|HNP-3|HNP3|HP-3|HP3	8	8p23.1
DEPTOR		64798	DEPTOR	DEP domain containing MTOR-interacting protein	DEP.6|DEPDC6	8	8q24.12
DUSP6		1848	DUSP6	dual specificity phosphatase 6	HH19|MKP3|PYST1	12	12q22-q23
ELL2		22936	ELL2	elongation factor, RNA polymerase II, 2	-	5	5q15
ENO3		2027	ENO3	enolase 3 (beta, muscle)	GSD13|MSE	17	17p13.2
ENPP2		5168	ENPP2	ectonucleotide pyrophosphatase/phosphodiesterase 2	ATX|ATX-X|AUTOTAXIN|LysoPLD|NPP2|PD-IALPHA|PDNP2	8	8q24.1
ERAP2		64167	ERAP2	endoplasmic reticulum aminopeptidase 2	L-RAP|LRAP	5	5q15
F2RL1		2150	F2RL1	coagulation factor II (thrombin) receptor-like 1	GPR11|PAR2	5	5q13
FABP5		2171	FABP5	fatty acid binding protein 5 (psoriasis-associated)	E-FABP|EFABP|KFABP|PA-FABP|PAFABP	8	8q21.13
FAM20A		54757	FAM20A	family with sequence similarity 20, member A	AI1G|AIGFS|FP2747	17	17q24.2
FCER1G		2207	FCER1G	Fc fragment of IgE, high affinity I, receptor for; gamma polypeptide	FCRG	1	1q23
FKBP5		2289	FKBP5	FK506 binding protein 5	AIG6|FKBP51|FKBP54|P54|PPIase|Ptg-10	6	6p21.31
GPR88		54112	GPR88	G protein-coupled receptor 88	STRG	1	1p21.3
HAMP		57817	HAMP	hepcidin antimicrobial peptide	HEPC|HFE2B|LEAP1|PLTR	19	19q13.1
HLA-DRA		3122	HLA-DRA	major histocompatibility complex, class II, DR alpha	HLA-DRA1|MLRW	6	6p21.3
HPGD		3248	HPGD	hydroxyprostaglandin dehydrogenase 15-(NAD)	15-PGDH|PGDH|PGDH1|PHOAR1|SDR36C1	4	4q34-q35
HS3ST3B1		9953	HS3ST3B1	heparan sulfate (glucosamine) 3-O-sulfotransferase 3B1	3-OST-3B|3OST3B1|h3-OST-3B	17	17p12
ICAM1		3383	ICAM1	intercellular adhesion molecule 1	BB2|CD54|P3.58	19	19p13.3-p13.2
IFNGR1		3459	IFNGR1	interferon gamma receptor 1	CD119|IFNGR|IMD27A|IMD27B	6	6q23.3
IRF2BPL		64207	IRF2BPL	interferon regulatory factor 2 binding protein-like	C14orf4|EAP1	14	14q24.3
KLHL29		114818	KLHL29	kelch-like family member 29	KBTBD9	2	2p24.1
LECT2		3950	LECT2	leukocyte cell-derived chemotaxin 2	chm-II|chm2	5	5q31.1
LEPR		3953	LEPR	leptin receptor	CD295|LEP-R|LEPRD|OB-R|OBR	1	1p31
LGALS8		3964	LGALS8	lectin, galactoside-binding, soluble, 8	Gal-8|PCTA-1|PCTA1|Po66-CBP	1	1q43
MCL1		4170	MCL1	myeloid cell leukemia 1	BCL2L3|EAT|MCL1-ES|MCL1L|MCL1S|Mcl-1|TM|bcl2-L-3|mcl1/EAT	1	1q21
MLIP		90523	MLIP	muscular LMNA-interacting protein	C6orf142	6	6p12.1
MME		4311	MME	membrane metallo-endopeptidase	CALLA|CD10|NEP|SFE	3	3q25.2
MNDA		4332	MNDA	myeloid cell nuclear differentiation antigen	PYHIN3	1	1q22
MT1M		4499	MT1M	metallothionein 1M	MT-1M|MT-IM|MT1|MT1K	16	16q13
MXD1		4084	MXD1	MAX dimerization protein 1	BHLHC58|MAD|MAD1	2	2p13-p12
NFATC2		4773	NFATC2	nuclear factor of activated T-cells, cytoplasmic, calcineurin-dependent 2	NFAT1|NFATP	20	20q13.2
NUDT13		25961	NUDT13	nudix (nucleoside diphosphate linked moiety X)-type motif 13	-	10	10q22.1
OSGIN2		734	OSGIN2	oxidative stress induced growth inhibitor family member 2	C8orf1|hT41	8	8q21
PLEKHA7		144100	PLEKHA7	pleckstrin homology domain containing, family A member 7	-	11	11p15.1
PLIN1		5346	PLIN1	perilipin 1	FPLD4|PERI|PLIN	15	15q26
PRKCE		5581	PRKCE	protein kinase C, epsilon	PKCE|nPKC-epsilon	2	2p21
RBM3		5935	RBM3	RNA binding motif (RNP1, RRM) protein 3	IS1-RNPL|RNPL	X	Xp11.2
RGCC		28984	RGCC	regulator of cell cycle	C13orf15|RGC-32|RGC32|bA157L14.2	13	13q14.11
RIPK4		54101	RIPK4	receptor-interacting serine-threonine kinase 4	ANKK2|ANKRD3|DIK|NKRD3|PKK|PPS2|RIP4	21	21q22.3
RNF125		54941	RNF125	ring finger protein 125, E3 ubiquitin protein ligase	TNORS|TRAC-1|TRAC1	18	18q12.1
RPS6KA5		9252	RPS6KA5	ribosomal protein S6 kinase, 90kDa, polypeptide 5	MSK1|MSPK1|RLPK	14	14q31-q32.1
S100A9		6280	S100A9	S100 calcium binding protein A9	60B8AG|CAGB|CFAG|CGLB|L1AG|LIAG|MAC387|MIF|MRP14|NIF|P14	1	1q21
SAMSN1		64092	SAMSN1	SAM domain, SH3 domain and nuclear localization signals 1	HACS1|NASH1|SASH2|SH3D6B|SLy2	21	21q11
SCD		6319	SCD	stearoyl-CoA desaturase (delta-9-desaturase)	FADS5|MSTP008|SCD1|SCDOS	10	10q24.31
SELL		6402	SELL	selectin L	CD62L|LAM1|LECAM1|LEU8|LNHR|LSEL|LYAM1|PLNHR|TQ1	1	1q24.2
SGCE		8910	SGCE	sarcoglycan, epsilon	DYT11|ESG	7	7q21.3
SGK1		6446	SGK1	serum/glucocorticoid regulated kinase 1	SGK	6	6q23
SGMS2		166929	SGMS2	sphingomyelin synthase 2	SMS2	4	4q25
SLC3A1		6519	SLC3A1	solute carrier family 3 (amino acid transporter heavy chain), member 1	ATR1|CSNU1|D2H|NBAT|RBAT	2	2p16.3
SPIDR		23514	SPIDR	scaffolding protein involved in DNA repair	KIAA0146	8	8q11.21
SRD5A2		6716	SRD5A2	steroid-5-alpha-reductase, alpha polypeptide 2 (3-oxo-5 alpha-steroid delta 4-dehydrogenase alpha 2)	-	2	2p23
SRGN		5552	SRGN	serglycin	PPG|PRG|PRG1	10	10q22.1
STK17A		9263	STK17A	serine/threonine kinase 17a	DRAK1	7	7p13
TDO2		6999	TDO2	tryptophan 2,3-dioxygenase	TDO|TO|TPH2|TRPO	4	4q31-q32
TIFA		92610	TIFA	TRAF-interacting protein with forkhead-associated domain	T2BP|T6BP|TIFAA	4	4q25
TJP2		9414	TJP2	tight junction protein 2	C9DUPq21.11|DFNA51|DUP9q21.11|PFIC4|X104|ZO2	9	9q13-q21
TM4SF1		4071	TM4SF1	transmembrane 4 L six family member 1	H-L6|L6|M3S1|TAAL6	3	3q21-q25
TMEM154		201799	TMEM154	transmembrane protein 154	-	4	4q31.3
TREM1		54210	TREM1	triggering receptor expressed on myeloid cells 1	CD354|TREM-1	6	6p21.1
TSLP		85480	TSLP	thymic stromal lymphopoietin	-	5	5q22.1
TSPAN13		27075	TSPAN13	tetraspanin 13	NET-6|NET6|TM4SF13	7	7p21.1
TSPAN8		7103	TSPAN8	tetraspanin 8	CO-029|TM4SF3	12	12q14.1-q21.1
UGT1A3		54659	UGT1A3	UDP glucuronosyltransferase 1 family, polypeptide A3	UDPGT|UDPGT 1-3|UGT-1C|UGT1-03|UGT1.3|UGT1A3S|UGT1C	2	2q37
UGT1A1		54658	UGT1A1	UDP glucuronosyltransferase 1 family, polypeptide A1	BILIQTL1|GNT1|HUG-BR1|UDPGT|UDPGT 1-1|UGT1|UGT1A	2	2q37
UGT1A9		54600	UGT1A9	UDP glucuronosyltransferase 1 family, polypeptide A9	HLUGP4|LUGP4|UDPGT|UDPGT 1-9|UGT-1I|UGT1-09|UGT1-9|UGT1.9|UGT1A9S|UGT1AI|UGT1I	2	2q37
UGT1A5		54579	UGT1A5	UDP glucuronosyltransferase 1 family, polypeptide A5	UDPGT|UDPGT 1-5|UGT1E	2	2q37
UGT1A8		54576	UGT1A8	UDP glucuronosyltransferase 1 family, polypeptide A8	UDPGT|UDPGT 1-8|UGT-1H|UGT1-08|UGT1.8|UGT1A8S|UGT1H	2	2q37
UGT2A3		79799	UGT2A3	UDP glucuronosyltransferase 2 family, polypeptide A3	-	4	4q13.2
UNC93A		54346	UNC93A	unc-93 homolog A (C. elegans)	Unc-93A|dJ366N23.1|dJ366N23.2	6	6q27
WNK3		65267	WNK3	WNK lysine deficient protein kinase 3	PRKWNK3	X	Xp11.22
YPEL2		388403	YPEL2	yippee-like 2	FKSG4	17	17q22
ZBTB21		49854	ZBTB21	zinc finger and BTB domain containing 21	ZNF295	21	21q22.3
ZFP36L2		678	ZFP36L2	ZFP36 ring finger protein-like 2	BRF2|ERF-2|ERF2|RNF162C|TIS11D	2	2p22.3-p21
GRID1		2894	GRID1	glutamate receptor, ionotropic, delta 1	GluD1	10	10q22
HYDIN		54768	HYDIN	HYDIN, axonemal central pair apparatus protein	CILD5|HYDIN1|HYDIN2|PPP1R31	16	16q22.2
MEP1B		4225	MEP1B	meprin A, beta	-	18	18q12.2-q12.3
NCAM2		4685	NCAM2	neural cell adhesion molecule 2	NCAM21	21	21q21.1
PRAMEF17		391004	PRAMEF17	PRAME family member 17	-	1	1p36.21
SCUBE1		80274	SCUBE1	signal peptide, CUB domain, EGF-like 1	-	22	22q13
SPP1		6696	SPP1	secreted phosphoprotein 1	BNSP|BSPI|ETA-1|OPN	4	4q22.1
SQLE		6713	SQLE	squalene epoxidase	-	8	8q24.1
CHAC1		79094	CHAC1	ChaC glutathione-specific gamma-glutamylcyclotransferase 1	-	15	15q15.1
GSTT1		2952	GSTT1	glutathione S-transferase theta 1	-	22	22q11.23
RFC1		5981	RFC1	replication factor C (activator 1) 1, 145kDa	A1|MHCBFB|PO-GA|RECC1|RFC|RFC140	4	4p14-p13
SHBG		6462	SHBG	sex hormone-binding globulin	ABP|SBP|TEBG	17	17p13.1

## Sheet: Cellular component
Analysis: Cellular component
Dataset name: NH
Cellular component	No. of genes in the dataset	No. of genes in the background dataset	Percentage of genes	Fold enrichment	P-value (Hypergeometric test)	Bonferroni method	BH method	Q-value (Storey-Tibshirani method)	genes mapped (from input data set)
Plasma membrane	156	3479	30.83	1.28971	0.000177472	0.139138	0.0347845	0.196633	HMMR; GRIA3; LGALS4; CX3CR1; SLC29A1; P2RY2; TLR7; RTP4; UNC119; EPHA1; PAQR7; SLC12A1; RALGPS1; ABCC5; EDAR; TLR3; TNFSF10; CDH15; CHRNB1; SLC22A7; PAQR4; AMOT; CNTNAP2; CD3G; ACE2; PCDH18; PIGR; TRHDE; HTR2B; GGT1; ABCC6; SLC22A11; ANXA13; ABCG8; RET; OAS2; GPNMB; CA12; GNAO1; MRAP; TRPM8; PIM1; CYR61; EPHA2; HBEGF; ITPRIP; RGS1; KCNK1; CDH19; RGS2; IL4R; SLITRK3; RALGDS; PTGS2; PLAUR; S100P; V…
Integral to membrane	46	1702	9.09091	0.77747	0.976002	1	1	1	NAT8B; MANBAL; C9orf91; RALGPS1; MARVELD3; EDAR; BTN3A1; LRRN3; TMEM63A; AMOT; CNTNAP2; PITPNM2; GIMAP2; PNPLA3; FADS1; TMEM45B; TMEM98; SLC16A13; GPNMB; CA12; C2orf82; CHST9; SLC5A12; LRRC19; AGPAT9; CDH19; PLAUR; EMP1; HAS2; FPR1; FPR2; PVR; SLCO1A2; GPM6B; XKR4; OR4F5; OR4F21; ACKR3; CLDN1; CLEC7A; GPR88; RIPK4; TSPAN13; UNC93A; GRID1; NCAM2;
Integral to plasma membrane	59	934	11.6601	1.81705	5.67168e-06	0.00444659	0.0014822	0.0083787	CX3CR1; SLC29A1; P2RY2; EPHA1; ABCC5; TLR3; TNFSF10; CHRNB1; SLC22A7; CD3G; PIGR; TRHDE; SLC22A11; GOLM1; FADS2; EPHA2; HBEGF; IL4R; SDC4; TNFRSF1A; THBD; HAS2; GPRC5A; C5AR1; ATP2B4; SLC11A1; PTGER2; SLC22A4; GJA1; PPAN; FCAR; LPAR1; SLC7A2; AVPR1A; GPR3; TMPRSS2; SLC7A1; ROM1; HLA-C; CCR1; CD44; CLDN1; CSF2RB; CXCR2; ENPP2; F2RL1; FCER1G; HLA-DRA; HS3ST3B1; ICAM1; IFNGR1; MME; SELL; SGCE; SGMS2…
Golgi aparatus	23	897	4.54545	0.737757	0.954038	1	1	1	AP1S1; ABCG8; GOLM1; ICA1; CHST9; STMN2; ADAMTS1; CRISPLD2; SDC4; TNFRSF1A; FPR1; ADAM19; GRHL1; RPGR; CH25H; CTSS; F2RL1; HLA-DRA; MME; PRKCE; SGMS2; SRGN; SPP1;
Nucleus	194	5847	38.3399	0.954298	0.816923	1	1	1	TYMS; HMMR; ZWINT; BCAR3; PEG10; ASPM; TBX10; NOL3; IFIT2; FRAT1; ME1; PALMD; SKP2; PTTG1; DBP; ONECUT1; CEBPA; SIRT4; ABCC5; SPC25; TLR3; PMS2; TNFSF10; PKIB; HIST1H2BF; ZMAT3; GPAM; ZNF219; TBX3; PRKCZ; AMOT; AMACR; MTMR4; KIAA1161; CRYAA; HIST1H2AC; FANCL; OAS1; RPL39L; BRCA1; NOL4; GCK; CASC5; UBD; OAS2; HNF4A; KIF22; DNMT3L; TBX15; USP18; ACBD5; IP6K3; GADD45B; JUNB; FOSB; SOCS3; FOS; MYC; P…
Perinuclear region of cytoplasm	1	119	0.197628	0.24408	0.985428	1	1	1	STMN2;
Actin cytoskeleton	3	132	0.592885	0.655773	0.842362	1	1	1	NFE2; CDC42EP3; ABLIM1;
Ribonucleoprotein complex	1	65	0.197628	0.446822	0.900281	1	1	1	BRCA1;
Nucleolus	42	1257	8.3004	0.961187	0.63191	1	1	1	TYMS; ASPM; NOL3; THAP2; ME1; EEF1A2; HIST1H2BF; ZMAT3; TBX3; HIST1H2AC; RPL39L; NOL4; NCAPG2; OAS2; JUNB; FOS; MYC; FOSL2; PHLDA1; ATF3; BCL6; CLCF1; RRS1; KLF4; NFE2; RASL10A; FYTTD1; PPAN; RRP12; URB2; SYNE2; GRHL1; MLF1; PDLIM3; RPGR; ANP32E; DDX21; HPGD; RBM3; S100A9; YPEL2; RFC1;
Mitochondrion	30	1259	5.92885	0.685536	0.991873	1	1	1	TYMS; HMMR; PDP2; NOL3; GLT8D1; SIRT4; NAGS; GPAM; AMACR; BRCA1; GCK; DBI; IFI6; ACSM1; NR4A1; P4HA1; C10orf10; CASP4; MT1A; SLC22A4; DHODH; GRAMD4; MTHFD2; FRMD6; OXCT2; BCL2A1; ABCD3; MCL1; SCD; SLC3A1;
Cytosol	41	1178	8.10277	1.00123	0.52173	1	1	1	LGALS4; NOL3; UNC119; PTTG1; NINL; GPAM; PRKCZ; AMACR; ANXA9; AP1S1; GCK; RET; SPHK2; DNMT3L; SYT7; MAP3K8; SIK1; RALGDS; FOXO1; NAMPT; PFKFB3; ZFP36; RND1; RAB27A; S100A12; SERPINB9; CDKN1A; MAP3K14; EIF5; BIRC3; RAC1; IRS2; FLNC; RPGR; CH25H; AMD1; CASP7; HPGD; TDO2; CHAC1; GSTT1;
Ribosome	1	144	0.197628	0.201708	0.994033	1	1	1	RRS1;
Membrane fraction	17	346	3.35968	1.41387	0.0964792	1	1	1	WNT5A; SLC29A1; SLC12A1; ABCC5; SLC22A7; PRKCZ; FADS1; SPHK2; FADS2; SYT7; STMN2; EMP1; SLC7A2; RAC1; HLA-C; SLC3A1; TSPAN13;
Cytoplasm	209	5684	41.3043	1.05756	0.15669	1	1	1	TP53I3; TYMS; HMMR; ZWINT; RNF43; APOL3; PEG10; CKAP2; GRIA3; LGALS4; IFIT3; NOL3; RTP3; IFIT2; FBXO2; MAL2; TRIM14; FRAT1; ME1; PRSS3; TLR7; PALMD; RTP4; EEF1A2; UNC119; PCBP4; SLC7A6OS; PTTG1; TLR3; PDE11A; PMS2; ZMAT3; TBX3; PRKCZ; AMOT; PITPNM2; AMACR; FABP4; MTMR4; GRAP; PNPLA3; CRYAA; FANCL; ANXA9; AFP; OAS1; RPL39L; BRCA1; HTR2B; GGT1; GCK; CASC5; RET; SPHK2; RBP5; TCAP; UBD; OAS2; HNF4A; …
Exosomes	77	2043	15.2174	1.0841	0.236026	1	1	1	AKR1B10; LGALS4; C11orf52; MAL2; SLC29A1; EEF1A2; SLC12A1; TNFSF10; HIST1H2BF; TMEM63A; PRKCZ; GSTCD; ACE2; PIGR; FCGBP; GGT1; SLC22A11; ANXA13; RBP5; DBI; ABHD8; ACSM1; SLC5A12; DEFA1; EPHA2; THBS1; NAMPT; S100P; SLC2A3; SDC4; GPRC5A; CREB5; MYADM; TUBB6; RAB27A; ATP2B4; ACTG2; IL1RN; SERPINB9; SYNE2; TGM2; ANGPTL4; MMP25; S100A8; PTX3; SERPINA1; MCAM; MYH11; CD274; TMPRSS2; RAC1; FLNC; LAMC2; V…
Perinuclear region	3	131	0.592885	0.660778	0.838635	1	1	1	BRCA1; KLF6; GJA1;
Chromatin	1	32	0.197628	0.907464	0.678145	1	1	1	JUNB;
Oncostatin-M receptor complex	1	3	0.197628	9.65047	0.10073	1	1	1	OSM;
Lysosome	42	1620	8.3004	0.745811	0.98624	1	1	1	C9orf91; TLR3; SPTLC3; TMEM63A; PIGR; AP1S1; GGT1; SLC22A11; SPHK2; OAS2; GPNMB; SYT7; THBD; LYST; MYADM; RAB27A; ATP2B4; SLC11A1; SERPINB9; SYNE2; TGM2; AKAP12; S100A8; TAGLN; SERPINA1; MCAM; CD274; RAC1; SLC7A1; EFHD1; PAPPA; SERPINB2; ABCD3; CLDN1; CTSS; ERAP2; F2RL1; HLA-DRA; HPGD; MME; S100A9; TSPAN8;
Endoplasmic reticulum	43	1104	8.49802	1.12044	0.237432	1	1	1	FMO1; CYP7A1; RTP3; MOGAT2; TLR3; GPAM; FADS1; TMEM98; ABCG8; UGT1A6; OAS2; FADS2; ICA1; MRAP; FOS; PPP1R15A; AGPAT9; IER3; PTGS2; P4HA1; CRISPLD2; TNFRSF1A; CASP4; ERN1; ADAM19; SERPINA1; CH25H; ABLIM1; ALOX5AP; CASP7; CTSS; ERAP2; FABP5; HLA-DRA; MME; PRKCE; SCD; SRD5A2; UGT1A3; UGT1A1; UGT1A9; UGT1A8; SQLE;
Secretory granule	3	50	0.592885	1.73103	0.251556	1	1	1	RAB26; GCK; ICA1;
Nucleosome	2	44	0.395257	1.31353	0.455474	1	1	1	HIST1H2BF; HIST1H2AC;
Endosome	11	303	2.17391	1.04502	0.485429	1	1	1	MAL2; TLR3; MAMDC4; GPNMB; SYT7; FPR1; SLC11A1; AVPR1A; CTSS; CXCR2; MME;
Cell surface	18	205	3.55731	2.52658	0.000296249	0.23226	0.0464519	0.262587	GRIA3; TLR3; AMOT; ACE2; ANXA9; HBEGF; PLAUR; THBD; GJA1; MMP19; LPAR1; PVR; MMP25; CD44; CXCR2; F2RL1; LEPR; SCUBE1;
Mitochondrial intermembrane space	1	12	0.197628	2.41864	0.346115	1	1	1	DHODH;
Extracellular	104	1825	20.5534	1.63909	1.61066e-07	0.000126276	0.000126276	0.000713824	WNT5A; RNF43; APOL3; CKAP2; CCL14; EPHA1; OSGIN1; CD3G; ACE2; AFP; OAS1; CXCL9; PIGR; TRHDE; FREM2; FCGBP; GGT1; ANXA13; OAS2; PROL1; DBI; COL5A3; DEFA1; CEBPD; CYR61; ADAMTS1; CCL2; HBEGF; RGS2; THBS1; IL4R; BCL6; NAMPT; P4HA1; PLAUR; EGR1; IL6; VNN3; IL1RL1; IGFBP1; TNFRSF1A; THBD; PROK2; CLCF1; IL1B; CALCA; SERPINE1; IGFBP2; IL10; IL1RN; FCAR; MMP19; NBL1; STC1; TGFB3; PVR; TGM2; LIF; CDKN1A; …
Kinetochore	4	90	0.790514	1.28129	0.382259	1	1	1	ZWINT; SPC25; CASC5; KIF22;
Extracellular region	26	442	5.13834	1.6924	0.00640794	1	0.627978	1	TNFSF10; ACE2; CXCL9; PROL1; CCL2; THBS1; TNFRSF1A; PROK2; CLCF1; IL1B; SERPINE1; TGFB3; ANGPTL4; PTX3; SERPINA1; CCL3; NRG1; PAPPA; LAMC2; SAA1; COL1A1; COL1A2; CTSS; HAMP; SPP1; SHBG;
Internal side of plasma membrane	1	8	0.197628	3.62646	0.246613	1	1	1	GEM;
Membrane	15	350	2.96443	1.23337	0.238318	1	1	1	TLR3; GGT1; OAS2; MYADM; ATP2B4; CDH23; PVR; MMP25; MCAM; NRG1; SORCS1; CD44; CXCR2; MCL1; MME;
Extracellular space	35	404	6.917	2.49226	6.579e-07	0.000515793	0.000257897	0.00145786	WNT5A; PRSS3; CCL14; ACE2; CXCL9; CCL2; HBEGF; THBS1; IL6; IGFBP1; IL1B; CALCA; SERPINE1; IL10; IL1RN; SERPINB9; PVR; ANGPTL4; CHI3L1; ADAMTS4; SERPINA1; CSF3; OSM; FJX1; VCAN; NRG1; CCL20; COL1A1; COL1A2; ICAM1; LECT2; LGALS8; SRGN; MEP1B; SCUBE1;
Extracellular matrix	9	120	1.77866	2.15924	0.0240856	1	1	1	THBS1; SERPINE1; TGFB3; MMP25; VCAN; COL1A1; COL1A2; DEFA1B; MME;
Endoplasmic reticulum membrane	4	150	0.790514	0.768808	0.770407	1	1	1	CYP7A1; AGPAT9; CASP7; SQLE;
Ubiquitin ligase complex	1	43	0.197628	0.675376	0.782147	1	1	1	BRCA1;
Nucleoplasm	15	449	2.96443	0.961432	0.600729	1	1	1	ANXA9; BRCA1; GCK; MYC; JUN; ELL; NR4A1; FOXO1; IVNS1ABP; FYTTD1; CDKN1A; CASP7; DUSP6; RPS6KA5; RFC1;
Dendrite	2	27	0.395257	2.14025	0.241257	1	1	1	CNTNAP2; RAB27A;
Nuclear speck	1	31	0.197628	0.936728	0.666526	1	1	1	FYTTD1;
Centrosome	10	656	1.97628	0.438851	0.999369	1	1	1	HMMR; NINL; TTC8; BRCA1; CDH23; GFPT2; ANP32E; DDX21; PLEKHA7; YPEL2;
Soluble fraction	7	180	1.3834	1.11999	0.43609	1	1	1	UNC119; TNFSF10; FABP4; STMN2; IL1RL1; CCL3; GSTT1;
Nuclear envelope	2	71	0.395257	0.814086	0.712368	1	1	1	SYNE2; ALOX5AP;
Integral to Golgi membrane	1	19	0.197628	1.52803	0.489723	1	1	1	SGMS2;
Focal adhesion	1	45	0.197628	0.645366	0.797077	1	1	1	SYNE2;
Cytoskeleton	7	427	1.3834	0.472143	0.993018	1	1	1	CKAP2; THBS1; LYST; CNN1; CCDC71L; FCER1G; TJP2;
Apical plasma membrane	4	42	0.790514	2.74527	0.0571954	1	1	1	SLC22A11; ABCG8; SLC22A4; NRG1;
Intracellular	5	151	0.988142	0.95417	0.60701	1	1	1	IL1RN; NCOA7; TGM2; CXCR2; DEPTOR;
Platelet alpha granule lumen	3	35	0.592885	2.47268	0.120895	1	1	1	THBS1; TGFB3; SERPINA1;
Microtubule	3	129	0.592885	0.671022	0.830953	1	1	1	ASPM; CKAP2; KIF22;
Ruffle	1	24	0.197628	1.20983	0.572586	1	1	1	AMOT;
Cilium	1	10	0.197628	2.90189	0.298121	1	1	1	RPGR;
Connexon complex	1	5	0.197628	5.79799	0.162192	1	1	1	GJA1;
Insoluble fraction	1	13	0.197628	2.23274	0.368869	1	1	1	S100A12;
Endosome membrane	2	27	0.395257	2.14025	0.241257	1	1	1	TLR7; TLR3;
Stress fiber	1	16	0.197628	1.81436	0.432498	1	1	1	AMOT;
Nuclear lumen	1	2	0.197628	14.4517	0.0683323	1	1	1	SYNE2;
Proteinaceous extracellular matrix	4	70	0.790514	1.64732	0.225919	1	1	1	MMP19; CHI3L1; MMP25; VCAN;
Centriolar satellite	1	8	0.197628	3.62646	0.246613	1	1	1	RET;
Protein complex	2	65	0.395257	0.889221	0.665729	1	1	1	BRCA1; BCL3;
Transcription factor complex	2	43	0.395257	1.34407	0.443694	1	1	1	IVNS1ABP; SOX17;
Serine C-palmitoyltransferase complex	1	5	0.197628	5.79799	0.162192	1	1	1	SPTLC3;
Nuclear membrane	3	78	0.592885	1.10971	0.512846	1	1	1	SYNE2; ALOX5AP; SCD;
Transcription elongation factor complex	1	11	0.197628	2.63832	0.322542	1	1	1	ELL2;
Myosin complex	1	10	0.197628	2.90189	0.298121	1	1	1	FILIP1L;
Late endosome	3	40	0.592885	2.16367	0.161412	1	1	1	PRKCZ; RAB27A; F2RL1;
Nicotinic acetylcholine-gated receptor-channel complex	1	11	0.197628	2.63832	0.322542	1	1	1	CHRNB1;
Mitochondrial outer membrane	1	29	0.197628	1.00131	0.642016	1	1	1	MCL1;
Synaptic vesicle	1	24	0.197628	1.20983	0.572586	1	1	1	RGS1;
Microsome	10	156	1.97628	1.84534	0.0459089	1	1	1	MOGAT2; PRKCZ; FADS1; UGT1A6; OAS2; GPRC5A; UGT1A9; UGT1A5; UGT1A8; SQLE;
Lamellipodium	1	23	0.197628	1.2624	0.557165	1	1	1	AMOT;
Microtubule cytoskeleton	2	47	0.395257	1.2297	0.489927	1	1	1	CKAP2; LYST;
Intracellular membrane-bounded organelle	3	127	0.592885	0.681589	0.822959	1	1	1	PITPNM2; ANGPTL4; CTSS;
Cell junction	2	38	0.395257	1.52087	0.382809	1	1	1	PRKCZ; TJP2;
Mitochondrial matrix	2	79	0.395257	0.731657	0.765955	1	1	1	SIRT4; ACSM1;
Membrane raft	2	36	0.395257	1.60534	0.357648	1	1	1	ACE2; TNFRSF1A;
Collagen type V	1	3	0.197628	9.65047	0.10073	1	1	1	COL5A3;
Centriole	1	22	0.197628	1.31976	0.541188	1	1	1	RPGR;
Peroxisome	6	111	1.18577	1.55706	0.189541	1	1	1	DDO; PAQR7; AMACR; PHLDA1; ABCD3; BBOX1;
Endoplasmic reticulum lumen	3	24	0.592885	3.60552	0.0492118	1	1	1	FMO1; PTGS2; ERAP2;
Golgi membrane	2	55	0.395257	1.05087	0.574782	1	1	1	ICA1; GJA1;
BRCA1-A complex	1	7	0.197628	4.14378	0.219461	1	1	1	BRCA1;
Endocytic vesicle	2	16	0.395257	3.61076	0.105067	1	1	1	AMOT; LPAR1;
Voltage-gated potassium channel complex	2	42	0.395257	1.37606	0.431775	1	1	1	CNTNAP2; KCNK1;
External side of plasma membrane	4	35	0.790514	3.29417	0.0322725	1	1	1	AMOT; SLC22A11; THBS1; SCUBE1;
Sarcoglycan complex	1	4	0.197628	7.24387	0.132004	1	1	1	SGCE;
Spliceosomal complex	1	46	0.197628	0.631339	0.804155	1	1	1	IVNS1ABP;
Integral to endoplasmic reticulum membrane	1	31	0.197628	0.936728	0.666526	1	1	1	ERN1;
Z disc	2	8	0.395257	7.21701	0.0293967	1	1	1	TCAP; SYNE2;
BRCA1-BARD1 complex	1	2	0.197628	14.4517	0.0683323	1	1	1	BRCA1;
Early endosome	1	69	0.197628	0.420923	0.913501	1	1	1	LEPR;
Mitochondrial inner membrane	1	58	0.197628	0.50074	0.872115	1	1	1	DHODH;
Photoreceptor outer segment	1	5	0.197628	5.79799	0.162192	1	1	1	RPGR;
SUN-KASH complex	1	5	0.197628	5.79799	0.162192	1	1	1	SYNE2;
Gamma-tubulin ring complex	1	6	0.197628	4.83327	0.191332	1	1	1	BRCA1;
Cytoplasmic vesicle	5	160	0.988142	0.900501	0.657786	1	1	1	ADAMTS1; GPRC5A; RND1; VNN2; F2RL1;
Phagocytic vesicle membrane	1	3	0.197628	9.65047	0.10073	1	1	1	SLC11A1;
SCF ubiquitin ligase complex	2	15	0.395257	3.85132	0.0940207	1	1	1	FBXO27; SKP2;
Cytosolic large ribosomal subunit	1	36	0.197628	0.806663	0.72072	1	1	1	RPL39L;
Transport vesicle	1	21	0.197628	1.38258	0.524636	1	1	1	CRISPLD2;
Stored secretory granule	1	19	0.197628	1.52803	0.489723	1	1	1	THBS1;
Cyclin-dependent protein kinase holoenzyme complex	1	7	0.197628	4.14378	0.219461	1	1	1	CDKN1A;
Filopodium membrane	1	2	0.197628	14.4517	0.0683323	1	1	1	SYNE2;
Muscle myosin complex	1	15	0.197628	1.93524	0.412033	1	1	1	MYH11;
Granulocyte macrophage colony-stimulating factor receptor complex	1	1	0.197628	28.7603	0.0347695	1	1	1	CSF2RB;
Actin filament	1	24	0.197628	1.20983	0.572586	1	1	1	AMOT;
T cell receptor complex	1	12	0.197628	2.41864	0.346115	1	1	1	CD3G;
Endocytic vesicle membrane	1	22	0.197628	1.31976	0.541188	1	1	1	GRIA3;
Melanosome	1	7	0.197628	4.14378	0.219461	1	1	1	RAB27A;
Zonula adherens	1	4	0.197628	7.24387	0.132004	1	1	1	PLEKHA7;
Extrinsic to membrane	2	13	0.395257	4.44337	0.0730665	1	1	1	PLAUR; GFRA3;
Aggresome	1	6	0.197628	4.83327	0.191332	1	1	1	UBD;
Condensed nuclear chromosome	1	12	0.197628	2.41864	0.346115	1	1	1	RRS1;
BBSome	1	7	0.197628	4.14378	0.219461	1	1	1	TTC8;
Others	2	51	0.395257	1.13327	0.533673	1	1	1	SERPINA1; CTSS;
Fibrinogen complex	1	7	0.197628	4.14378	0.219461	1	1	1	THBS1;
Microtubule-based flagellum	1	2	0.197628	14.4517	0.0683323	1	1	1	OXCT2;
Synapse	2	33	0.395257	1.75123	0.319253	1	1	1	CHRNB1; SEMA4B;
Platelet alpha granule	1	10	0.197628	2.90189	0.298121	1	1	1	THBS1;
Nuclear chromosome	1	17	0.197628	1.7077	0.452251	1	1	1	JUN;
Apical membrane	1	16	0.197628	1.81436	0.432498	1	1	1	ABCC5;
Clathrin coat of trans-Golgi network vesicle	1	3	0.197628	9.65047	0.10073	1	1	1	AP1S1;
Integral to peroxisomal membrane	1	11	0.197628	2.63832	0.322542	1	1	1	ABCD3;
Interleukin-6 receptor complex	1	3	0.197628	9.65047	0.10073	1	1	1	IL6;
Golgi-associated vesicle membrane	1	5	0.197628	5.79799	0.162192	1	1	1	GJA1;
Tight junction	1	14	0.197628	2.07337	0.390832	1	1	1	AMOT;
Adherens junction	1	6	0.197628	4.83327	0.191332	1	1	1	RND1;
Microtubule basal body	1	8	0.197628	3.62646	0.246613	1	1	1	TTC8;
Dystrophin-associated glycoprotein complex	1	10	0.197628	2.90189	0.298121	1	1	1	SGCE;
DNA replication factor C complex	1	6	0.197628	4.83327	0.191332	1	1	1	RFC1;
Juxtaparanode region of axon	1	1	0.197628	28.7603	0.0347695	1	1	1	CNTNAP2;
Mitochondrial part	1	2	0.197628	14.4517	0.0683323	1	1	1	SYNE2;
AP-1 adaptor complex	1	5	0.197628	5.79799	0.162192	1	1	1	AP1S1;
Exocytic vesicle	1	3	0.197628	9.65047	0.10073	1	1	1	RAB27A;
Mitochondrial membrane	4	56	0.790514	2.05908	0.129774	1	1	1	MYC; DHODH; CASP7; MCL1;
Sarcoplasmic reticulum	1	32	0.197628	0.907464	0.678145	1	1	1	SYNE2;
Condensed chromosome kinetochore	1	7	0.197628	4.14378	0.219461	1	1	1	SPC25;
Nuclear heterochromatin	1	5	0.197628	5.79799	0.162192	1	1	1	FOXC1;
PCNA-p21 complex	1	2	0.197628	14.4517	0.0683323	1	1	1	CDKN1A;
Cell body fiber	1	2	0.197628	14.4517	0.0683323	1	1	1	CNTNAP2;
Zymogen granule	2	34	0.395257	1.69974	0.332126	1	1	1	GGT1; RAC1;
Cell projection	2	41	0.395257	1.40961	0.419721	1	1	1	ITPRIP; RAC1;
Collagen type I	2	2	0.395257	28.7603	0.00120661	0.945982	0.13514	0.763932	COL1A1; COL1A2;
Replication fork	1	3	0.197628	9.65047	0.10073	1	1	1	BCL6;
Sarcoplasm	1	3	0.197628	9.65047	0.10073	1	1	1	MB;
Extrinsic to plasma membrane	1	3	0.197628	9.65047	0.10073	1	1	1	SCUBE1;
Bcl3-Bcl10 complex	1	1	0.197628	28.7603	0.0347695	1	1	1	BCL3;
Chromaffin granule	1	3	0.197628	9.65047	0.10073	1	1	1	SYT7;
ACF complex	1	1	0.197628	28.7603	0.0347695	1	1	1	BAZ1A;
Secretory granule membrane	1	4	0.197628	7.24387	0.132004	1	1	1	ICA1;
Basolateral membrane	1	9	0.197628	3.22396	0.272822	1	1	1	ATP2B4;
Ndc80 complex	1	4	0.197628	7.24387	0.132004	1	1	1	SPC25;
Axolemma	1	1	0.197628	28.7603	0.0347695	1	1	1	CNTNAP2;
Lipid particle	1	4	0.197628	7.24387	0.132004	1	1	1	PLIN1;
Mast cell granule	1	1	0.197628	28.7603	0.0347695	1	1	1	CXCR2;
Bcl3/NF-kappaB2 complex	2	2	0.395257	28.7603	0.00120661	0.945982	0.13514	0.763932	BCL3; NFKB2;
Acrosomal vesicle	1	1	0.197628	28.7603	0.0347695	1	1	1	CASC5;
Lamellipodium membrane	1	2	0.197628	14.4517	0.0683323	1	1	1	SYNE2;
Axoneme	1	6	0.197628	4.83327	0.191332	1	1	1	RPGR;
Tertiary granule membrane	1	1	0.197628	28.7603	0.0347695	1	1	1	SLC11A1;
Cilium part	1	1	0.197628	28.7603	0.0347695	1	1	1	TTC8;
Others(granules of neutrophils)	1	1	0.197628	28.7603	0.0347695	1	1	1	DEFA1;

## Sheet: Molecular function
Analysis: Molecular function
Dataset name: NH
Molecular function	No. of genes in the dataset	No. of genes in the background dataset	Percentage of genes	Fold enrichment	P-value (Hypergeometric test)	Bonferroni method	BH method	Q-value (Storey-Tibshirani method)	genes mapped (from input data set)
Molecular function unknown	139	5685	24.0484	0.766757	0.999967	1	1	1	GINS2; CCDC121; TMEM169; ZWINT; LRRC20; RNF43; ASPM; KRT222; C11orf52; IFIT3; RTP3; GLT8D1; C19orf25; TRIM14; RMND1; MANBAL; C9orf91; PALMD; FRMD7; UNC119; SLC7A6OS; KBTBD3; C14orf80; ANKRD29; FAM13A; FAM168A; C19orf44; MARVELD3; AGFG2; MND1; LRRN3; SPATA18; SPTLC3; C2orf54; DBNDD1; NAGS; TMEM63A; AMOT; PITPNM2; GSTCD; CENPQ; TTC8; LRRC31; TMEM45B; MAMDC4; TMEM98; ORAI3; TMEM92; FCGBP; NOL4; FAM1…
Protease inhibitor activity	6	94	1.03806	2.00467	0.0798782	1	1	1	NOL3; PKIB; SERPINE1; SERPINB9; SERPINA1; SERPINB2;
Acyltransferase activity	5	80	0.865052	1.96352	0.112055	1	1	1	NAT8B; MOGAT2; GPAM; PNPLA3; AGPAT9;
Deacetylase activity	1	14	0.17301	2.26061	0.36485	1	1	1	SIRT4;
Cell adhesion molecule activity	14	356	2.42215	1.23401	0.248059	1	1	1	LGALS4; CDH15; CNTNAP2; PCDH18; CDH19; IGFBP1; CDH23; MCAM; CLDN1; ICAM1; SELL; TJP2; NCAM2; SPP1;
Ligase activity	6	112	1.03806	1.68252	0.148199	1	1	1	TYMS; FANCL; OAS1; OAS2; BIRC3; SGMS2;
Transaminase activity	2	23	0.346021	2.73919	0.165872	1	1	1	TGM2; GFPT2;
Transporter activity	19	576	3.2872	1.03489	0.473262	1	1	1	MAL2; SLC25A34; RTP4; ABCC5; AFP; AP1S1; ABCC6; ABCG8; RBP5; GOLM1; MB; SLC5A12; SLC11A1; SAA1; FABP5; MT1M; SLC3A1; GRID1; SHBG;
Translation regulator activity	2	101	0.346021	0.623986	0.836882	1	1	1	EEF1A2; EIF5;
ATPase activity	2	111	0.346021	0.567776	0.873231	1	1	1	ATP2B4; DDX21;
Catalytic activity	20	532	3.46021	1.17942	0.255623	1	1	1	FMO1; AKR1B10; CYP7A1; DDO; SPHK2; FADS2; CA12; ACSM1; ETNK1; DUSP10; MTHFD2; ALDH1A3; CH25H; MIOX; BBOX1; ENO3; HPGD; SRD5A2; TDO2; SQLE;
Transferase activity	11	156	1.90311	2.21298	0.011493	1	0.429071	1	GGT1; UGT1A6; NAMPT; HAS2; OXCT2; UGT1A3; UGT1A1; UGT1A9; UGT1A5; UGT1A8; UGT2A3;
GTPase activator activity	6	144	1.03806	1.30865	0.311406	1	1	1	RGS1; RGS2; SIPA1L2; EIF5; RGS16; ARAP2;
Oxidoreductase activity	4	161	0.692042	0.78097	0.759158	1	1	1	TP53I3; FADS1; P4HA1; SCD;
Hydrolase activity	4	203	0.692042	0.619398	0.891554	1	1	1	KIAA1161; VNN3; PADI4; NUDT13;
Isomerase activity	1	45	0.17301	0.703648	0.767814	1	1	1	FKBP5;
Serine-type peptidase activity	2	98	0.346021	0.643085	0.824265	1	1	1	PRSS3; TMPRSS2;
Receptor binding	7	129	1.21107	1.70387	0.118726	1	1	1	WNT5A; TNFSF10; DBI; PROK2; TNFSF14; CD274; MTUS1;
Structural molecule activity	5	269	0.865052	0.583999	0.933549	1	1	1	TCAP; ACTG2; MYBPH; MYH11; LAMC2;
Structural constituent of cytoskeleton	2	137	0.346021	0.460031	0.935664	1	1	1	TUBB6; SYNE2;
Cytoskeletal protein binding	9	218	1.55709	1.29596	0.261578	1	1	1	CKAP2; IFIT2; STMN2; RND1; TAGLN; CNN1; FLNC; VIL1; ABLIM1;
Metallopeptidase activity	8	101	1.38408	2.48663	0.015431	1	0.492214	1	ADAMTS1; MMP19; ADAM19; MMP25; ADAMTS4; PAPPA; MME; MEP1B;
G-protein coupled receptor activity	18	736	3.11419	0.767314	0.903665	1	1	1	CX3CR1; P2RY2; PAQR4; HTR2B; GPRC5A; C5AR1; FPR1; PTGER2; LPAR1; FPR2; AVPR1A; GPR3; OR4F5; OR4F21; ACKR3; CXCR2; F2RL1; GPR88;
Cytoskeletal anchoring activity	1	39	0.17301	0.811873	0.717848	1	1	1	AKAP12;
Lipid transporter activity	1	9	0.17301	3.51511	0.253043	1	1	1	APOL3;
Protein serine/threonine kinase activity	16	301	2.76817	1.66784	0.0325336	1	0.728752	1	PRKCZ; PIM1; SIK1; IRAK3; PIM3; ERN1; MAP3K14; MAK; CIT; MAPK4; PRKCE; RIPK4; RPS6KA5; SGK1; STK17A; WNK3;
Transcription regulator activity	23	832	3.97924	0.867223	0.789631	1	1	1	PTTG1; ZNF219; TBX3; BRCA1; HNF4A; DNMT3L; PPRC1; ATF3; ARID5B; BCL3; ELL; HIVEP1; KLF4; NCOA7; NFKBIZ; GRHL1; BATF3; RAX2; IRF1; C2CD4A; PRRX1; MXD1; ZBTB21;
Extracellular matrix structural constituent	11	166	1.90311	2.07968	0.0175791	1	0.492214	1	FREM2; COL5A3; CYR61; THBS1; CHI3L1; TNFAIP6; VCAN; COL1A1; COL1A2; SGCE; SRGN;
Receptor activity	24	361	4.15225	2.08553	0.000598105	0.133975	0.0669877	0.312972	HMMR; TLR7; KDELR3; PAQR7; EDAR; TLR3; CHRNB1; CD3G; PIGR; PLAUR; SDC4; TNFRSF1A; THBD; FCAR; PVR; TNFRSF10D; TNFRSF12A; GFRA3; ANKRD37; CCR1; CD44; FCER1G; LEPR; TREM1;
Ligand-dependent nuclear receptor activity	5	35	0.865052	4.48734	0.00476794	1	0.336592	1	HNF4A; NR4A1; NR4A3; NR4A2; NR5A2;
Transcription factor activity	40	842	6.92042	1.49003	0.00791617	1	0.354644	1	TBX10; DBP; ONECUT1; CEBPA; TBX15; JUNB; FOSB; FOS; MYC; JUN; CEBPD; FOSL2; PHLDA1; NFIL3; KLF11; KLF6; ZC3H12A; BACH2; FOXO1; ETS2; EGR1; FOSL1; MAFF; KLF5; CREB5; EGR3; NFE2; NR5A2; ELF3; FOXC1; ZNF878; NFKB2; TEAD4; SOX17; ARNTL2; BHLHE40; ELL2; MNDA; NFATC2; ZFP36L2;
Defense/immunity protein activity	5	61	0.865052	2.57501	0.0447259	1	0.910781	1	DEFA1; PTX3; DEFB118; DEFA1B; DEFA3;
Receptor signaling complex scaffold activity	13	322	2.24913	1.26692	0.23013	1	1	1	FRAT1; ANKS4B; GRAP; SOCS3; SOCS2; PELI1; CISH; SOCS1; LYST; IRS2; BCL2A1; SAMSN1; TIFA;
Calcium ion binding	10	185	1.7301	1.69661	0.0728746	1	1	1	NINL; ANXA9; ANXA13; SYT7; S100P; S100A12; STC1; S100A8; EFHD1; S100A9;
Transmembrane receptor protein tyrosine kinase activity	3	56	0.519031	1.68517	0.26452	1	1	1	EPHA1; RET; EPHA2;
Enzyme activator activity	1	4	0.17301	7.89805	0.121595	1	1	1	ALOX5AP;
Carboxy-lyase activity	3	20	0.519031	4.71696	0.024558	1	0.61122	1	ME1; HDC; AMD1;
Ubiquitin-specific protease activity	8	377	1.38408	0.666227	0.917182	1	1	1	FBXO27; FBXO2; SKP2; UBE2T; RNF214; UBD; USP18; RNF125;
Growth factor activity	7	110	1.21107	1.99815	0.0621869	1	1	1	OSGIN1; HBEGF; FGF14; IGFBP2; TGFB3; NRG1; LECT2;
ATP binding	1	6	0.17301	5.26975	0.176739	1	1	1	ABCD3;
DNA repair protein	1	57	0.17301	0.555537	0.842799	1	1	1	PMS2;
Protein binding	9	182	1.55709	1.55229	0.128664	1	1	1	PEG10; SPC25; PRPF40B; MRAP; GADD45G; SERTAD1; IVNS1ABP; NBL1; MCL1;
RNA binding	8	366	1.38408	0.68625	0.901217	1	1	1	PCBP4; SAMD3; ZFP36; RBPMS; LARP1B; MBNL2; APOBEC3A; RBM3;
GTPase activity	7	222	1.21107	0.990121	0.565615	1	1	1	RAB26; GIMAP2; GNAO1; CDC42EP3; RAB27A; GEM; RAC1;
DNA binding	14	654	2.42215	0.671733	0.959065	1	1	1	THAP2; HIST1H2BF; ZMAT3; HIST1H2AC; ZNF385B; KIF22; ARID3C; BCL6; ZNF331; LONRF2; BAZ1A; TIPARP; RFX2; RFC1;
Chaperone activity	2	126	0.346021	0.500189	0.913973	1	1	1	FABP4; MCL1;
Auxiliary transport protein activity	10	333	1.7301	0.942583	0.621559	1	1	1	SLC29A1; SLC12A1; SLC22A7; SLC16A13; SLC22A11; SLC2A3; SLC22A4; GJA1; SLC7A2; SLC7A1;
Ion transporter activity	1	23	0.17301	1.37641	0.525679	1	1	1	SLCO1A2;
MHC class I receptor activity	2	37	0.346021	1.70302	0.331196	1	1	1	HLA-C; HLA-DRA;
MHC class II receptor activity	2	38	0.346021	1.65822	0.342926	1	1	1	HLA-C; HLA-DRA;
Voltage-gated ion channel activity	1	130	0.17301	0.243606	0.985426	1	1	1	KCNE4;
Antigen binding	1	42	0.17301	0.753896	0.744045	1	1	1	BTN3A1;
Cysteine-type peptidase activity	3	46	0.519031	2.05143	0.180528	1	1	1	CASP4; CASP7; CTSS;
Structural constituent of ribosome	1	152	0.17301	0.208349	0.992897	1	1	1	RPL39L;
Hormone activity	1	25	0.17301	1.26634	0.555487	1	1	1	CALCA;
Transcription factor binding	1	10	0.17301	3.16395	0.276875	1	1	1	MAFF;
Heat shock protein activity	1	27	0.17301	1.17257	0.583424	1	1	1	CRYAA;
Kinase regulator activity	2	23	0.346021	2.73919	0.165872	1	1	1	UNC119; CDKN1A;
Protein tyrosine/serine/threonine phosphatase activity	2	37	0.346021	1.70302	0.331196	1	1	1	MTMR4; DUSP6;
Guanyl-nucleotide exchange factor activity	5	112	0.865052	1.40257	0.286519	1	1	1	BCAR3; RALGPS1; RALGDS; RASD1; RPGR;
Lipid kinase activity	1	35	0.17301	0.904632	0.678708	1	1	1	IP6K3;
Intracellular ligand-gated ion channel activity	1	30	0.17301	1.05535	0.622078	1	1	1	TRPM8;
Extracellular ligand-gated ion channel activity	1	41	0.17301	0.77228	0.735594	1	1	1	GRIA3;
Protein threonine/tyrosine kinase activity	1	28	0.17301	1.13071	0.596729	1	1	1	MAP3K8;
Phosphoric diester hydrolase activity	2	29	0.346021	2.17266	0.236086	1	1	1	PDE11A; ENPP2;
Cytokine activity	12	107	2.07612	3.51934	0.000155144	0.0347522	0.0347522	0.162365	IFI6; IL6; CLCF1; IL1B; IL10; IL1RN; LIF; CSF3; OSM; CCL3; IL24; TSLP;
Carboxypeptidase activity	1	21	0.17301	1.50743	0.493877	1	1	1	ACE2;
Transmembrane receptor activity	6	52	1.03806	3.62352	0.00601058	1	0.336592	1	IL4R; IL1RL1; IL18RAP; SORCS1; CSF2RB; IFNGR1;
Helicase activity	1	25	0.17301	1.26634	0.555487	1	1	1	SBNO2;
Aminopeptidase activity	2	29	0.346021	2.17266	0.236086	1	1	1	TRHDE; ERAP2;
Ribonucleoprotein	2	41	0.346021	1.53691	0.377686	1	1	1	RRS1; PPAN;
Storage protein	1	3	0.17301	10.522	0.0926555	1	1	1	PLIN1;
Racemase and epimerase activity	1	11	0.17301	2.87658	0.299948	1	1	1	AMACR;
Phosphorylase activity	2	20	0.346021	3.14986	0.132382	1	1	1	GCK; UPP1;
GTP binding	1	8	0.17301	3.95396	0.228427	1	1	1	RASL10A;
Signal transducer activity	1	31	0.17301	1.02132	0.63415	1	1	1	TSPAN8;
Peroxidase activity	1	20	0.17301	1.58277	0.477186	1	1	1	PTGS2;
Chemokine activity	4	53	0.692042	2.37208	0.0882538	1	1	1	CCL14; CXCL9; CCL2; CCL20;
Glutathione transferase activity	1	21	0.17301	1.50743	0.493877	1	1	1	GSTT1;
Receptor regulator activity	1	6	0.17301	5.26975	0.176739	1	1	1	ITPRIP;
Inward rectifier channel	1	14	0.17301	2.26061	0.36485	1	1	1	KCNK1;
Carbohydrate binding	1	7	0.17301	4.518	0.203002	1	1	1	LGALS8;
Sulfotransferase activity	2	53	0.346021	1.189	0.507484	1	1	1	CHST9; HS3ST3B1;
Sugar-phosphatase activity	1	4	0.17301	7.89805	0.121595	1	1	1	PFKFB3;
Protein serine/threonine phosphatase activity	1	44	0.17301	0.719636	0.760147	1	1	1	PDP2;
Amino acid transporter activity	1	2	0.17301	15.7568	0.0627641	1	1	1	SLC7A2;
Caspase activator activity	1	7	0.17301	4.518	0.203002	1	1	1	GRAMD4;

## Sheet: Biological process
Analysis: Biological Process
Dataset name: NH
Biological process	No. of genes in the dataset	No. of genes in the background dataset	Percentage of genes	Fold enrichment	P-value (Hypergeometric test)	Bonferroni method	BH method	Q-value (Storey-Tibshirani method)	genes mapped (from input data set)
Biological_process unknown	109	4731	18.8581	0.722489	0.999987	1	1	1	GINS2; CCDC121; TMEM169; NAT8B; LRRC20; ASPM; KRT222; C11orf52; RTP3; GLT8D1; C19orf25; TRIM14; RMND1; THAP2; MANBAL; C9orf91; FRMD7; SLC7A6OS; KBTBD3; C14orf80; ANKRD29; FAM13A; FAM168A; C19orf44; MARVELD3; AGFG2; MND1; LRRN3; SPATA18; SPTLC3; C2orf54; DBNDD1; TMEM63A; AMOT; PRPF40B; CENPQ; LRRC31; TMEM45B; MAMDC4; TMEM98; ORAI3; TMEM92; NOL4; FAM124B; SLC25A42; CASC5; JAKMIP2; GPNMB; LRIG3; PRO…
Protein metabolism	32	1323	5.53633	0.75865	0.963135	1	1	1	FBXO27; FBXO2; PRSS3; EEF1A2; PKIB; GSTCD; ACE2; CRYAA; RPL39L; TRHDE; UBE2T; RNF214; UBD; PHLDA1; ADAMTS1; P4HA1; MIDN; SERPINE1; MMP19; ADAM19; SERPINB9; EIF5; ADAMTS4; SERPINA1; TMPRSS2; PAPPA; SERPINB2; CTSS; ERAP2; MME; RNF125; MEP1B;
Metabolism	61	1683	10.5536	1.13667	0.159856	1	1	1	FMO1; TYMS; AKR1B10; CYP7A1; GLT8D1; DDO; ME1; MOGAT2; PDE11A; NAGS; GPAM; AMACR; PNPLA3; KIAA1161; FADS1; FANCL; GGT1; GCK; SPHK2; FADS2; CA12; DBI; ACSM1; PTGS2; P4HA1; ETNK1; PFKFB3; VNN3; UPP1; PADI4; HAS2; MT1A; HDC; TGM2; GFPT2; MTHFD2; ALDH1A3; OXCT2; MT1B; CH25H; MIOX; AMD1; BBOX1; DDX21; ENO3; ENPP2; FKBP5; HPGD; HS3ST3B1; NUDT13; SCD; SRD5A2; TDO2; UGT1A3; UGT1A1; UGT1A9; UGT1A5; UGT1A8…
Energy pathways	61	1633	10.5536	1.17147	0.108539	1	1	1	FMO1; TYMS; AKR1B10; CYP7A1; GLT8D1; DDO; ME1; MOGAT2; PDE11A; NAGS; GPAM; AMACR; PNPLA3; KIAA1161; FADS1; FANCL; GGT1; GCK; SPHK2; FADS2; CA12; DBI; ACSM1; AGPAT9; PTGS2; P4HA1; ETNK1; PFKFB3; VNN3; UPP1; PADI4; HAS2; MT1A; HDC; TGM2; GFPT2; MTHFD2; ALDH1A3; OXCT2; MT1B; CH25H; MIOX; BBOX1; DDX21; ENO3; ENPP2; FKBP5; HPGD; HS3ST3B1; NUDT13; SCD; SRD5A2; TDO2; UGT1A3; UGT1A1; UGT1A9; UGT1A5; UGT1…
Cell growth and/or maintenance	34	1125	5.88235	0.947915	0.654137	1	1	1	CKAP2; IFIT2; CDH15; TTC8; FREM2; TCAP; NCAPG2; COL5A3; THBS1; EMP1; RRS1; RND1; TUBB6; ACTG2; SYNE2; MYBPH; AKAP12; CHI3L1; TNFAIP6; CNN1; MYH11; PDLIM3; VCAN; FLNC; LAMC2; VIL1; ABLIM1; CLDN1; COL1A1; COL1A2; SGCE; NCAM2; SCUBE1; SPP1;
Transport	35	1215	6.05536	0.903506	0.760211	1	1	1	GRIA3; MAL2; SLC29A1; SLC25A34; SLC12A1; ABCC5; SLC22A7; AFP; SLC16A13; AP1S1; ABCC6; SLC22A11; ABCG8; RBP5; GOLM1; MB; SLC5A12; TRPM8; KCNK1; SLC2A3; ATP2B4; SLC11A1; SLC22A4; GJA1; SLC7A2; SLCO1A2; KCNE4; SLC7A1; RPGR; ABCD3; FABP5; MT1M; SLC3A1; GRID1; SHBG;
Cell communication	152	3713	26.2976	1.2837	0.000372657	0.0663329	0.0165832	0.0887177	TP53I3; WNT5A; HMMR; BCAR3; LGALS4; PDP2; NOL3; RAB26; CX3CR1; TLR7; PALMD; RTP4; UNC119; EPHA1; PAQR7; RALGPS1; EDAR; TLR3; TNFSF10; NINL; CHRNB1; CNTNAP2; PITPNM2; GIMAP2; OSGIN1; FABP4; MTMR4; GRAP; ANXA9; PCDH18; HTR2B; ANXA13; RET; HNF4A; GPNMB; USP18; GNAO1; SYT7; DCDC2; IP6K3; STMN2; GADD45B; SOCS3; PPP1R15A; PIM1; SOCS2; CYR61; EPHA2; MAP3K8; HBEGF; PELI1; RGS1; CDH19; SERTAD1; RGS2; SIK1…
Signal transduction	162	3934	28.0277	1.29129	0.000161804	0.0288011	0.00960037	0.0513605	TP53I3; WNT5A; HMMR; BCAR3; LGALS4; PDP2; NOL3; RAB26; FRAT1; CX3CR1; P2RY2; TLR7; PALMD; RTP4; UNC119; EPHA1; PAQR7; RALGPS1; EDAR; TLR3; ANKS4B; TNFSF10; NINL; CHRNB1; PAQR4; PRKCZ; CNTNAP2; PITPNM2; GIMAP2; OSGIN1; FABP4; MTMR4; GRAP; ANXA9; PCDH18; HTR2B; ANXA13; RET; HNF4A; GPNMB; USP18; GNAO1; SYT7; DCDC2; IP6K3; STMN2; GADD45B; SOCS3; PPP1R15A; PIM1; SOCS2; CYR61; EPHA2; MAP3K8; HBEGF; PEL…
Regulation of nucleobase, nucleoside, nucleotide and nucleic acid metabolism	80	2828	13.8408	0.88712	0.894854	1	1	1	TBX10; PTTG1; DBP; SAMD3; ONECUT1; CEBPA; SIRT4; PMS2; HIST1H2BF; ZMAT3; ZNF219; TBX3; HIST1H2AC; ZNF385B; HNF4A; KIF22; DNMT3L; TBX15; JUNB; FOSB; FOS; MYC; JUN; CEBPD; GADD45G; FOSL2; PPRC1; ATF3; ARID5B; NFIL3; KLF11; KLF6; BCL3; ELL; ZC3H12A; BACH2; FOXO1; ETS2; EGR1; FOSL1; HIVEP1; ZFP36; ZNF331; MAFF; IVNS1ABP; KLF5; RBPMS; CREB5; EGR3; LARP1B; KLF4; NFE2; NR4A3; MBNL2; NR5A2; ELF3; FOXC1; …
RNA metabolism	1	26	0.17301	1.21759	0.569702	1	1	1	SBNO2;
Lipid storage	1	2	0.17301	15.7559	0.0627675	1	1	1	PLIN1;
Lipid transport	1	7	0.17301	4.51775	0.203012	1	1	1	SAA1;
Regulation of physiological process	1	5	0.17301	6.32124	0.149621	1	1	1	CALCA;
Regulation of cell cycle	4	57	0.692042	2.20553	0.108129	1	1	1	SKP2; KLF4; NBL1; CDKN1A;
Vesicle-mediated transport	1	17	0.17301	1.86181	0.423762	1	1	1	RPGR;
Carbohydrate metabolism	1	8	0.17301	3.95374	0.228439	1	1	1	CHST9;
Immune response	39	576	6.7474	2.12356	8.64277e-06	0.00153841	0.00153841	0.00823028	IFIT3; CCL14; BTN3A1; CD3G; OAS1; CXCL9; PIGR; FCGBP; OAS2; IFI6; DEFA1; CCL2; IL4R; IL6; THBD; IL1B; RAB27A; C2CD4B; IL10; FCAR; NFKBIZ; PTX3; CSF3; CD274; CCL3; CCL20; DEFB118; HLA-C; ALOX5AP; DEFA1B; DEFA3; FCER1G; HAMP; HLA-DRA; IFNGR1; LECT2; SRGN; TREM1; TSLP;
Anti-apoptosis	7	32	1.21107	6.86675	5.4375e-05	0.00967875	0.00483938	0.0258899	PRKCZ; IFI6; IER3; NAMPT; ANGPTL4; SERPINB2; MCL1;
Proteolysis and peptidolysis	1	16	0.17301	1.9781	0.404762	1	1	1	MMP25;
Ion transport	1	48	0.17301	0.659642	0.789398	1	1	1	GRIA3;
Cell cycle	1	22	0.17301	1.43887	0.510055	1	1	1	ZWINT;
Apoptosis	12	220	2.07612	1.71167	0.0500767	1	0.990406	1	PEG10; PCBP4; SPC25; BCL6; NR4A1; CASP4; TNFSF14; GRAMD4; IL24; BCL2A1; CASP7; MCL1;
Regulation of gene expression, epigenetic	4	66	0.692042	1.90482	0.159162	1	1	1	BRCA1; ARID3C; BCL6; RAX2;
Regulation of immune response	2	8	0.346021	7.86833	0.0250234	1	0.742362	1	BCL6; SLC11A1;
Peptide metabolism	1	4	0.17301	7.89761	0.121602	1	1	1	MME;
Negative regulation of enzyme activity	1	3	0.17301	10.5214	0.0926604	1	1	1	PRKCZ;
Cytokine and chemokine mediated signaling pathway	1	4	0.17301	7.89761	0.121602	1	1	1	RPS6KA5;
Cell proliferation	2	39	0.346021	1.61562	0.354615	1	1	1	RNF43; IL4R;
DNA repair	1	58	0.17301	0.545931	0.847844	1	1	1	PMS2;
Xenobiotic metabolism	1	6	0.17301	5.26946	0.176748	1	1	1	UGT1A6;
Regulation of signal transduction	1	24	0.17301	1.31901	0.540845	1	1	1	DAND5;
Cell-cell signaling	1	16	0.17301	1.9781	0.404762	1	1	1	FGF14;
Lipid metabolism	1	33	0.17301	0.959389	0.657171	1	1	1	AGPAT9;
Cell migration	1	15	0.17301	2.10989	0.385137	1	1	1	VNN2;
Regulation of translation	1	13	0.17301	2.43424	0.343928	1	1	1	RPS6KA5;
Regulation of transport	1	3	0.17301	10.5214	0.0926604	1	1	1	RPGR;
Inflammatory response	4	14	0.692042	8.97481	0.000793987	0.14133	0.0282659	0.151218	PRKCZ; SLC11A1; MMP25; SAA1;
Transcription	2	46	0.346021	1.36982	0.433818	1	1	1	ZNF878; RPS6KA5;
Protein localization	1	3	0.17301	10.5214	0.0926604	1	1	1	RAB27A;
Amino acid transport	1	3	0.17301	10.5214	0.0926604	1	1	1	SLC7A2;
Muscle development	1	5	0.17301	6.32124	0.149621	1	1	1	TAGLN;
Pyrimidine salvage	1	1	0.17301	31.3559	0.0318914	1	0.810953	1	UPP1;
Protein transport	2	11	0.346021	5.72437	0.0461509	1	0.990406	1	KDELR3; MRAP;
Morphogenesis	1	3	0.17301	10.5214	0.0926604	1	1	1	DAND5;
Lipoprotein metabolism	1	3	0.17301	10.5214	0.0926604	1	1	1	APOL3;

## Sheet: Biological pathway
Analysis: Biological Pathway
Dataset name: NH
Biological pathway	No. of genes in the dataset	No. of genes in the background dataset	Percentage of genes	Fold enrichment	P-value (Hypergeometric test)	Bonferroni method	BH method	Q-value (Storey-Tibshirani method)	genes mapped (from input data set)
The role of Nef in HIV-1 replication and disease pathogenesis	2	27	0.689655	1.61402	0.35571	1	1	1	AP1S1; RAC1;
Vif-mediated degradation of APOBEC3G	1	69	0.344828	0.31743	0.962186	1	1	1	SKP2;
Nef mediated downregulation of MHC class I complex cell surface expression	1	9	0.344828	2.43128	0.34629	1	1	1	AP1S1;
Nef-mediates down modulation of cell surface receptors by recruiting them to clathrin adapters	1	20	0.344828	1.09474	0.611513	1	1	1	AP1S1;
Nef and signal transduction	1	8	0.344828	2.73481	0.314652	1	1	1	RAC1;
Developmental Biology	17	432	5.86207	0.853982	0.788741	1	1	1	ONECUT1; CEBPA; CDH15; FABP4; GCK; HNF4A; CEBPD; FOXO1; KLF5; KLF4; RND1; ANGPTL4; MYH11; RAC1; ABLIM1; PLIN1; RPS6KA5;
Vpu mediated degradation of CD4	1	67	0.344828	0.326904	0.958399	1	1	1	SKP2;
Sema4D in semaphorin signaling	3	27	1.03448	2.41702	0.125915	1	1	1	RND1; MYH11; RAC1;
Sema4D mediated inhibition of cell attachment and migration	2	8	0.689655	5.44254	0.0493409	1	0.614236	1	RND1; RAC1;
Sema4D induced cell migration and growth-cone collapse	3	22	1.03448	2.96609	0.0781961	1	0.836096	1	RND1; MYH11; RAC1;
SEMA3A-Plexin repulsion signaling by inhibiting Integrin adhesion	2	14	0.689655	3.11169	0.133973	1	1	1	RND1; RAC1;
Axon guidance	5	219	1.72414	0.496149	0.97678	1	1	1	RND1; MYH11; RAC1; ABLIM1; RPS6KA5;
Semaphorin interactions	3	64	1.03448	1.0199	0.571873	1	1	1	RND1; MYH11; RAC1;
NCAM signaling for neurite out-growth	1	57	0.344828	0.384245	0.932984	1	1	1	RPS6KA5;
Sema3A PAK dependent Axon repulsion	1	15	0.344828	1.45942	0.507781	1	1	1	RAC1;
Signal transduction by L1	2	35	0.689655	1.24521	0.48465	1	1	1	RAC1; RPS6KA5;
CDO in myogenesis	1	24	0.344828	0.912363	0.678567	1	1	1	CDH15;
Myogenesis	1	24	0.344828	0.912363	0.678567	1	1	1	CDH15;
Regulation of gene expression in late stage (branching morphogenesis) pancreatic bud precursor cells	1	6	0.344828	3.6449	0.246725	1	1	1	ONECUT1;
Regulation of gene expression in early pancreatic precursor cells	1	6	0.344828	3.6449	0.246725	1	1	1	ONECUT1;
Regulation of beta-cell development	4	108	1.37931	0.805228	0.741065	1	1	1	ONECUT1; GCK; HNF4A; FOXO1;
Signaling by Robo receptor	1	23	0.344828	0.952014	0.662971	1	1	1	RAC1;
Inactivation of Cdc42 and Rac	1	8	0.344828	2.73481	0.314652	1	1	1	RAC1;
Activation of Rac	1	8	0.344828	2.73481	0.314652	1	1	1	RAC1;
Recycling pathway of L1	1	32	0.344828	0.684343	0.780033	1	1	1	RPS6KA5;
L1CAM interactions	2	79	0.689655	0.551763	0.885822	1	1	1	RAC1; RPS6KA5;
Platelet Adhesion to exposed collagen	3	13	1.03448	5.01796	0.0196608	1	0.290214	1	COL1A1; COL1A2; FCER1G;
Reduction of cytosolic Ca++ levels	1	10	0.344828	2.18839	0.376472	1	1	1	ATP2B4;
Platelet calcium homeostasis	1	16	0.344828	1.36826	0.530529	1	1	1	ATP2B4;
Platelet activation, signaling and aggregation	4	138	1.37931	0.630191	0.886824	1	1	1	PRKCZ; RAC1; FCER1G; PRKCE;
Transcriptional Regulation of White Adipocyte Differentiation	7	69	2.41379	2.20315	0.0386609	1	0.507766	1	CEBPA; FABP4; CEBPD; KLF5; KLF4; ANGPTL4; PLIN1;
Elongation arrest and recovery	1	31	0.344828	0.706412	0.769346	1	1	1	ELL;
Regulation of gene expression in beta cells	3	98	1.03448	0.666092	0.837191	1	1	1	GCK; HNF4A; FOXO1;
AKT-mediated inactivation of FOXO1A	1	3	0.344828	7.27768	0.132056	1	1	1	FOXO1;
Hemostasis	17	375	5.86207	0.983784	0.56647	1	1	1	PRKCZ; KIF22; PLAUR; MAFF; THBD; NFE2; SERPINE1; ATP2B4; RAC1; IRF1; SERPINB2; COL1A1; COL1A2; FCER1G; PRKCE; SELL; TREM1;
Platelet homeostasis	1	40	0.344828	0.547509	0.849544	1	1	1	ATP2B4;
Cell surface interactions at the vascular wall	4	72	1.37931	1.20779	0.425977	1	1	1	THBD; FCER1G; SELL; TREM1;
Dissolution of Fibrin Clot	3	10	1.03448	6.52185	0.00914012	1	0.15881	0.727465	PLAUR; SERPINE1; SERPINB2;
Common Pathway	1	16	0.344828	1.36826	0.530529	1	1	1	THBD;
Formation of Fibrin Clot (Clotting Cascade)	1	33	0.344828	0.663612	0.790226	1	1	1	THBD;
Effects of PIP2 hydrolysis	1	20	0.344828	1.09474	0.611513	1	1	1	PRKCE;
GPVI-mediated activation cascade	3	27	1.03448	2.41702	0.125915	1	1	1	PRKCZ; RAC1; FCER1G;
Mitotic Prometaphase	4	99	1.37931	0.878423	0.676577	1	1	1	ZWINT; SPC25; CENPQ; CASC5;
Mitotic Prophase	1	62	0.344828	0.353263	0.947194	1	1	1	NINL;
Golgi Cisternae Pericentriolar Stack Reorganization	1	62	0.344828	0.353263	0.947194	1	1	1	NINL;
Mitotic M-M/G1 phases	6	242	2.06897	0.538616	0.971051	1	1	1	ZWINT; SKP2; SPC25; NINL; CENPQ; CASC5;
M Phase	5	158	1.72414	0.687688	0.860903	1	1	1	ZWINT; SPC25; NINL; CENPQ; CASC5;
DNA Replication	9	261	3.10345	0.748697	0.858708	1	1	1	GINS2; ZWINT; SKP2; SPC25; NINL; CENPQ; CASC5; CDKN1A; RFC1;
Factors involved in megakaryocyte development and platelet production	5	119	1.72414	0.913046	0.648068	1	1	1	KIF22; MAFF; NFE2; RAC1; IRF1;
Kinesins	1	21	0.344828	1.04264	0.629481	1	1	1	KIF22;
Netrin-1 signaling	2	45	0.689655	0.968557	0.621432	1	1	1	RAC1; ABLIM1;
DCC mediated attractive signaling	2	10	0.689655	4.35512	0.0746479	1	0.834561	1	RAC1; ABLIM1;
Smooth Muscle Contraction	2	24	0.689655	1.81569	0.304269	1	1	1	ACTG2; MYH11;
Striated Muscle Contraction	1	30	0.344828	0.729951	0.758141	1	1	1	TCAP;
Muscle contraction	3	50	1.03448	1.30541	0.40752	1	1	1	TCAP; ACTG2; MYH11;
Host Interactions of HIV factors	3	141	1.03448	0.462972	0.961794	1	1	1	SKP2; AP1S1; RAC1;
Pausing and recovery of Tat-mediated HIV-1 elongation	1	30	0.344828	0.729951	0.758141	1	1	1	ELL;
Pausing and recovery of HIV-1 elongation	1	31	0.344828	0.706412	0.769346	1	1	1	ELL;
Tat-mediated HIV-1 elongation arrest and recovery	1	30	0.344828	0.729951	0.758141	1	1	1	ELL;
Formation of HIV-1 elongation complex in the absence of HIV-1 Tat	1	42	0.344828	0.521443	0.863183	1	1	1	ELL;
HIV-1 elongation arrest and recovery	1	31	0.344828	0.706412	0.769346	1	1	1	ELL;
HIV-1 Transcription Elongation	1	41	0.344828	0.534158	0.856525	1	1	1	ELL;
Tat-mediated elongation of the HIV-1 transcript	1	41	0.344828	0.534158	0.856525	1	1	1	ELL;
Formation of HIV-1 elongation complex containing HIV-1 Tat	1	41	0.344828	0.534158	0.856525	1	1	1	ELL;
Transcription of the HIV genome	1	60	0.344828	0.365036	0.941911	1	1	1	ELL;
Late Phase of HIV Life Cycle	1	92	0.344828	0.238081	0.987412	1	1	1	ELL;
HIV Life Cycle	1	103	0.344828	0.212657	0.992573	1	1	1	ELL;
HIV Infection	4	203	1.37931	0.428416	0.986364	1	1	1	SKP2; AP1S1; ELL; RAC1;
PLC-gamma1 signalling	1	30	0.344828	0.729951	0.758141	1	1	1	PRKCE;
PI3K/AKT activation	3	30	1.03448	2.1754	0.158468	1	1	1	NR4A1; CDKN1A; IRS2;
Nuclear Events (kinase and transcription factor activation)	1	15	0.344828	1.45942	0.507781	1	1	1	RPS6KA5;
ERK/MAPK targets	1	12	0.344828	1.82397	0.432734	1	1	1	RPS6KA5;
Insulin receptor recycling	1	28	0.344828	0.782072	0.73408	1	1	1	IRS2;
Signal attenuation	1	11	0.344828	1.98963	0.405266	1	1	1	IRS2;
SOS-mediated signalling	1	15	0.344828	1.45942	0.507781	1	1	1	IRS2;
p75 NTR receptor-mediated signalling	1	39	0.344828	0.561544	0.842224	1	1	1	RAC1;
Signalling by NGF	7	143	2.41379	1.06314	0.491259	1	1	1	RALGDS; NR4A1; CDKN1A; RAC1; IRS2; PRKCE; RPS6KA5;
NRAGE signals death through JNK	1	8	0.344828	2.73481	0.314652	1	1	1	RAC1;
Cell death signalling via NRAGE, NRIF and NADE	1	21	0.344828	1.04264	0.629481	1	1	1	RAC1;
p38MAPK events	1	9	0.344828	2.43128	0.34629	1	1	1	RALGDS;
Signalling to RAS	1	21	0.344828	1.04264	0.629481	1	1	1	RALGDS;
Signalling to ERKs	1	30	0.344828	0.729951	0.758141	1	1	1	RALGDS;
NGF signalling via TRKA from the plasma membrane	6	107	2.06897	1.21812	0.371833	1	1	1	RALGDS; NR4A1; CDKN1A; IRS2; PRKCE; RPS6KA5;
AKT phosphorylates targets in the nucleus	1	4	0.344828	5.4628	0.172091	1	1	1	NR4A1;
PIP3 activates AKT signaling	2	21	0.689655	2.07495	0.252147	1	1	1	NR4A1; CDKN1A;
AKT phosphorylates targets in the cytosol	1	9	0.344828	2.43128	0.34629	1	1	1	CDKN1A;
Signaling by FGFR	3	95	1.03448	0.687125	0.821305	1	1	1	NR4A1; CDKN1A; PRKCE;
GAB1 signalosome	2	32	0.689655	1.36191	0.438049	1	1	1	NR4A1; CDKN1A;
IRS activation	1	5	0.344828	4.37242	0.210286	1	1	1	IRS2;
IRS-mediated signalling	1	51	0.344828	0.429442	0.910823	1	1	1	IRS2;
PI3K Cascade	1	38	0.344828	0.576318	0.83455	1	1	1	IRS2;
IRS-related events	1	53	0.344828	0.41324	0.918921	1	1	1	IRS2;
Signaling by Insulin receptor	1	79	0.344828	0.277254	0.976548	1	1	1	IRS2;
Insulin receptor signalling cascade	1	56	0.344828	0.391106	0.929715	1	1	1	IRS2;
PI-3K cascade	2	27	0.689655	1.61402	0.35571	1	1	1	NR4A1; CDKN1A;
Phospholipase C-mediated cascade	1	27	0.344828	0.811027	0.721169	1	1	1	PRKCE;
Downstream signaling of activated FGFR	3	66	1.03448	0.988997	0.592989	1	1	1	NR4A1; CDKN1A; PRKCE;
Signaling by EGFR	3	98	1.03448	0.666092	0.837191	1	1	1	NR4A1; CDKN1A; PRKCE;
Signal Transduction	39	1208	13.4483	0.700396	0.996777	1	1	1	WNT5A; FRAT1; CX3CR1; P2RY2; SKP2; PDE11A; GRAP; CXCL9; HTR2B; GNAO1; CCL2; RGS1; RGS2; THBS1; RALGDS; NR4A1; PROK2; SOCS1; C5AR1; FPR1; CALCA; PTGER2; LPAR1; FPR2; CDKN1A; AVPR1A; RAC1; CCL3; IRS2; CCL20; OR4F5; OR4F21; COL1A1; COL1A2; CXCR2; F2RL1; PRKCE; RPS6KA5; SPP1;
DAG and IP3 signaling	1	27	0.344828	0.811027	0.721169	1	1	1	PRKCE;
EGFR interacts with phospholipase C-gamma	1	29	0.344828	0.755113	0.746395	1	1	1	PRKCE;
Assembly of the pre-replicative complex	1	83	0.344828	0.263894	0.980632	1	1	1	SKP2;
DNA Replication Pre-Initiation	1	98	0.344828	0.223506	0.990559	1	1	1	SKP2;
M/G1 Transition	1	98	0.344828	0.223506	0.990559	1	1	1	SKP2;
APC/C:Cdc20 mediated degradation of Cyclin B	1	22	0.344828	0.995267	0.646621	1	1	1	PTTG1;
APC/C:Cdc20 mediated degradation of Securin	2	66	0.689655	0.660427	0.815647	1	1	1	SKP2; PTTG1;
APC/C:Cdh1 mediated degradation of Cdc20 and other APC/C:Cdh1 targeted proteins in late mitosis/early G1	2	69	0.689655	0.631717	0.83463	1	1	1	SKP2; PTTG1;
Loss of Nlp from mitotic centrosomes	1	61	0.344828	0.359053	0.944615	1	1	1	NINL;
Regulation of mitotic cell cycle	2	81	0.689655	0.538141	0.89412	1	1	1	SKP2; PTTG1;
Loss of proteins required for interphase microtubule organizationÃÂ from the centrosome	1	61	0.344828	0.359053	0.944615	1	1	1	NINL;
APC/C-mediated degradation of cell cycle proteins	2	81	0.689655	0.538141	0.89412	1	1	1	SKP2; PTTG1;
Regulation of APC/C activators between G1/S and early anaphase	1	78	0.344828	0.280808	0.9754	1	1	1	SKP2;
APC/C:Cdc20 mediated degradation of mitotic proteins	2	71	0.689655	0.613924	0.846289	1	1	1	SKP2; PTTG1;
Activation of APC/C and APC/C:Cdc20 mediated degradation of mitotic proteins	2	72	0.689655	0.605399	0.851835	1	1	1	SKP2; PTTG1;
SCF-beta-TrCP mediated degradation of Emi1	1	70	0.344828	0.312896	0.963949	1	1	1	SKP2;
Ubiquitin-dependent degradation of Cyclin D	1	66	0.344828	0.331856	0.956365	1	1	1	SKP2;
Ubiquitin-dependent degradation of Cyclin D1	1	66	0.344828	0.331856	0.956365	1	1	1	SKP2;
Mitotic G2-G2/M phases	1	99	0.344828	0.221249	0.991001	1	1	1	NINL;
G2/M Transition	1	96	0.344828	0.228162	0.989608	1	1	1	NINL;
Recruitment of mitotic centrosome proteins and complexes	1	70	0.344828	0.312896	0.963949	1	1	1	NINL;
Centrosome maturation	1	70	0.344828	0.312896	0.963949	1	1	1	NINL;
E2F mediated regulation of DNA replication	1	28	0.344828	0.782072	0.73408	1	1	1	TYMS;
G1/S-Specific Transcription	1	15	0.344828	1.45942	0.507781	1	1	1	TYMS;
SCF(Skp2)-mediated degradation of p27/p21	2	67	0.689655	0.650571	0.822181	1	1	1	SKP2; CDKN1A;
Cyclin E associated events during G1/S transition	3	78	1.03448	0.836863	0.704995	1	1	1	SKP2; MYC; CDKN1A;
G1/S Transition	4	117	1.37931	0.743293	0.795353	1	1	1	TYMS; SKP2; MYC; CDKN1A;
S Phase	5	121	1.72414	0.897956	0.662619	1	1	1	GINS2; SKP2; MYC; CDKN1A; RFC1;
Cyclin A:Cdk2-associated events at S phase entry	3	90	1.03448	0.725294	0.791913	1	1	1	SKP2; MYC; CDKN1A;
G1 Phase	2	31	0.689655	1.40583	0.422012	1	1	1	SKP2; CDKN1A;
Mitotic G1-G1/S phases	4	140	1.37931	0.621189	0.893333	1	1	1	TYMS; SKP2; MYC; CDKN1A;
Cell Cycle, Mitotic	12	317	4.13793	0.821691	0.801455	1	1	1	TYMS; GINS2; ZWINT; SKP2; PTTG1; SPC25; NINL; CENPQ; CASC5; MYC; CDKN1A; RFC1;
Cyclin D associated events in G1	2	31	0.689655	1.40583	0.422012	1	1	1	SKP2; CDKN1A;
Synthesis, Secretion, and Deacylation of Ghrelin	1	16	0.344828	1.36826	0.530529	1	1	1	KLF4;
Unfolded Protein Response	5	63	1.72414	1.72451	0.163755	1	1	1	KDELR3; ATF3; CCL2; IGFBP1; ERN1;
Insulin Synthesis and Processing	1	132	0.344828	0.165941	0.99816	1	1	1	RAB27A;
Activation of Chaperones by IRE1alpha	2	45	0.689655	0.968557	0.621432	1	1	1	KDELR3; ERN1;
Regulation of Insulin-like Growth Factor (IGF) Activity by Insulin-like Growth Factor Binding Proteins (IGFBPs)	3	14	1.03448	4.65979	0.024186	1	0.353879	1	IGFBP1; IGFBP2; PAPPA;
PERK regulated gene expression	3	11	1.03448	5.92949	0.0121443	1	0.200561	0.918718	ATF3; CCL2; IGFBP1;
Extension of Telomeres	1	28	0.344828	0.782072	0.73408	1	1	1	RFC1;
Telomere C-strand (Lagging Strand) Synthesis	1	22	0.344828	0.995267	0.646621	1	1	1	RFC1;
Telomere Maintenance	1	49	0.344828	0.446967	0.901919	1	1	1	RFC1;
Diabetes pathways	9	216	3.10345	0.904668	0.671648	1	1	1	KDELR3; ATF3; CCL2; IGFBP1; KLF4; RAB27A; IGFBP2; ERN1; PAPPA;
Polymerase switching on the C-strand of the telomere	1	14	0.344828	1.56359	0.483935	1	1	1	RFC1;
Polymerase switching	1	14	0.344828	1.56359	0.483935	1	1	1	RFC1;
Lagging Strand Synthesis	1	20	0.344828	1.09474	0.611513	1	1	1	RFC1;
Nucleosome assembly	2	35	0.689655	1.24521	0.48465	1	1	1	CENPQ; CASC5;
Deposition of New CENPA-containing Nucleosomes at the Centromere	2	35	0.689655	1.24521	0.48465	1	1	1	CENPQ; CASC5;
Removal of licensing factors from origins	2	85	0.689655	0.512819	0.909064	1	1	1	SKP2; CDKN1A;
Chromosome Maintenance	3	69	1.03448	0.946004	0.623377	1	1	1	CENPQ; CASC5; RFC1;
Regulation of DNA replication	2	88	0.689655	0.495339	0.918954	1	1	1	SKP2; CDKN1A;
CDT1 association with the CDC6:ORC:origin complex	1	74	0.344828	0.295985	0.970218	1	1	1	SKP2;
Synthesis of DNA	4	109	1.37931	0.797841	0.747592	1	1	1	GINS2; SKP2; CDKN1A; RFC1;
Switching of origins to a post-replicative state	2	83	0.689655	0.525175	0.901856	1	1	1	SKP2; CDKN1A;
Orc1 removal from chromatin	2	83	0.689655	0.525175	0.901856	1	1	1	SKP2; CDKN1A;
CDK-mediated phosphorylation and removal of Cdc6	1	66	0.344828	0.331856	0.956365	1	1	1	SKP2;
DNA strand elongation	2	31	0.689655	1.40583	0.422012	1	1	1	GINS2; RFC1;
Unwinding of DNA	1	11	0.344828	1.98963	0.405266	1	1	1	GINS2;
Leading Strand Synthesis	1	14	0.344828	1.56359	0.483935	1	1	1	RFC1;
Chemokine receptors bind chemokines	6	42	2.06897	3.10285	0.0117941	1	0.196726	0.901148	CX3CR1; CXCL9; CCL2; CCL3; CCL20; CXCR2;
Vasopressin-like receptors	1	6	0.344828	3.6449	0.246725	1	1	1	AVPR1A;
Signaling by GPCR	26	800	8.96552	0.705153	0.98351	1	1	1	WNT5A; CX3CR1; P2RY2; PDE11A; CXCL9; HTR2B; GNAO1; CCL2; RGS1; RGS2; PROK2; C5AR1; FPR1; CALCA; PTGER2; LPAR1; FPR2; AVPR1A; RAC1; CCL3; CCL20; OR4F5; OR4F21; CXCR2; F2RL1; PRKCE;
GPCR ligand binding	18	336	6.2069	1.16252	0.286822	1	1	1	WNT5A; CX3CR1; P2RY2; CXCL9; HTR2B; CCL2; PROK2; C5AR1; FPR1; CALCA; PTGER2; LPAR1; FPR2; AVPR1A; CCL3; CCL20; CXCR2; F2RL1;
Class A/1 (Rhodopsin-like receptors)	16	274	5.51724	1.26725	0.195622	1	1	1	CX3CR1; P2RY2; CXCL9; HTR2B; CCL2; PROK2; C5AR1; FPR1; PTGER2; LPAR1; FPR2; AVPR1A; CCL3; CCL20; CXCR2; F2RL1;
Peptide ligand-binding receptors	12	167	4.13793	1.55969	0.0836617	1	0.878784	1	CX3CR1; CXCL9; CCL2; PROK2; C5AR1; FPR1; FPR2; AVPR1A; CCL3; CCL20; CXCR2; F2RL1;
CREB phosphorylation	1	7	0.344828	3.12494	0.281488	1	1	1	RPS6KA5;
Signaling by PDGF	3	78	1.03448	0.836863	0.704995	1	1	1	NR4A1; CDKN1A; PRKCE;
Downstream signal transduction	3	75	1.03448	0.870333	0.679392	1	1	1	NR4A1; CDKN1A; PRKCE;
Signaling by SCF-KIT	5	66	1.72414	1.64614	0.187161	1	1	1	GRAP; NR4A1; SOCS1; CDKN1A; RAC1;
Regulation of KIT signaling	1	9	0.344828	2.43128	0.34629	1	1	1	SOCS1;
G alpha (i) signalling events	1	31	0.344828	0.706412	0.769346	1	1	1	RGS1;
G alpha (s) signalling events	1	31	0.344828	0.706412	0.769346	1	1	1	PDE11A;
GPCR downstream signaling	13	530	4.48276	0.532392	0.997347	1	1	1	P2RY2; PDE11A; HTR2B; RGS1; RGS2; LPAR1; FPR2; AVPR1A; RAC1; OR4F5; OR4F21; F2RL1; PRKCE;
Calcitonin-like ligand receptors	1	8	0.344828	2.73481	0.314652	1	1	1	CALCA;
G alpha (12/13) signalling events	1	21	0.344828	1.04264	0.629481	1	1	1	RAC1;
G alpha (q) signalling events	8	120	2.75862	1.44762	0.188339	1	1	1	P2RY2; HTR2B; RGS2; LPAR1; FPR2; AVPR1A; F2RL1; PRKCE;
G-protein activation	1	13	0.344828	1.68377	0.458938	1	1	1	GNAO1;
Opioid Signalling	1	53	0.344828	0.41324	0.918921	1	1	1	GNAO1;
PLC beta mediated events	1	39	0.344828	0.561544	0.842224	1	1	1	GNAO1;
G-protein mediated events	1	40	0.344828	0.547509	0.849544	1	1	1	GNAO1;
Olfactory Signaling Pathway	2	349	0.689655	0.12491	0.999999	1	1	1	OR4F5; OR4F21;
Amine ligand-binding receptors	1	36	0.344828	0.608326	0.818067	1	1	1	HTR2B;
Formyl peptide receptors bind formyl peptides and many other ligands	2	5	0.689655	8.70155	0.0193116	1	0.290214	1	FPR1; FPR2;
Serotonin receptors	1	12	0.344828	1.82397	0.432734	1	1	1	HTR2B;
Eicosanoid ligand-binding receptors	1	15	0.344828	1.45942	0.507781	1	1	1	PTGER2;
Prostanoid ligand receptors	1	9	0.344828	2.43128	0.34629	1	1	1	PTGER2;
P2Y receptors	1	11	0.344828	1.98963	0.405266	1	1	1	P2RY2;
Nucleotide-like (purinergic) receptors	1	15	0.344828	1.45942	0.507781	1	1	1	P2RY2;
Lysosphingolipid and LPA receptors	1	8	0.344828	2.73481	0.314652	1	1	1	LPAR1;
Class B/2 (Secretin family receptors)	2	47	0.689655	0.927351	0.645191	1	1	1	WNT5A; CALCA;
Adaptive Immune System	11	237	3.7931	1.00753	0.536075	1	1	1	SKP2; CD3G; MAP3K8; PVR; MAP3K14; CD274; RAC1; HLA-C; CTSS; ERAP2; SELL;
TCR signaling	1	47	0.344828	0.465982	0.89213	1	1	1	CD3G;
Phosphorylation of CD3 and TCR zeta chains	1	9	0.344828	2.43128	0.34629	1	1	1	CD3G;
Translocation of ZAP-70 to Immunological synapse	1	7	0.344828	3.12494	0.281488	1	1	1	CD3G;
Immune System	40	522	13.7931	1.66237	0.000840412	1	0.0189433	0.0867745	IFIT3; IFIT2; TLR7; SKP2; TLR3; CD3G; OAS1; OAS2; USP18; IFI6; SOCS3; FOS; JUN; SOCS2; MAP3K8; PELI1; EGR1; IL6; CISH; IRAK3; SOCS1; IL1B; IL1RN; NFKB2; PVR; MAP3K14; CD274; RAC1; IRS2; IRF1; HLA-C; CD44; CSF2RB; CTSS; ERAP2; ICAM1; IFNGR1; RNF125; RPS6KA5; SELL;
RNA Polymerase II Transcription	1	101	0.344828	0.216868	0.991824	1	1	1	ELL;
Formation and Maturation of mRNA Transcript	1	185	0.344828	0.118403	0.999859	1	1	1	ELL;
Signaling by Wnt	2	75	0.689655	0.581186	0.867398	1	1	1	FRAT1; SKP2;
Degradation of beta-catenin by the destruction complex	2	75	0.689655	0.581186	0.867398	1	1	1	FRAT1; SKP2;
Beta-catenin phosphorylation cascade	1	7	0.344828	3.12494	0.281488	1	1	1	FRAT1;
Integrin cell surface interactions	4	72	1.37931	1.20779	0.425977	1	1	1	THBS1; COL1A1; COL1A2; SPP1;
Gene Expression	2	378	0.689655	0.115327	1	1	1	1	ELL; EIF5;
Formation of RNA Pol II elongation complex	1	42	0.344828	0.521443	0.863183	1	1	1	ELL;
RNA Polymerase II Pre-transcription Events	1	58	0.344828	0.377622	0.936102	1	1	1	ELL;
RNA Polymerase II Transcription Elongation	1	42	0.344828	0.521443	0.863183	1	1	1	ELL;
Pyrimidine biosynthesis	2	6	0.689655	7.25371	0.0280931	1	0.390494	1	TYMS; DHODH;
Pyrimidine metabolism	2	22	0.689655	1.98068	0.269542	1	1	1	TYMS; DHODH;
Androgen biosynthesis	1	8	0.344828	2.73481	0.314652	1	1	1	SRD5A2;
DNA Repair	4	106	1.37931	0.820419	0.72763	1	1	1	FANCL; BRCA1; UBE2T; RFC1;
Amino acid and oligopeptide SLC transporters	3	48	1.03448	1.35979	0.382272	1	1	1	SLC7A2; SLC7A1; SLC3A1;
Sphingolipid metabolism	2	29	0.689655	1.50275	0.389258	1	1	1	SPHK2; SGMS2;
Prostanoid metabolism	2	13	0.689655	3.35087	0.118289	1	1	1	PTGS2; ZFP36;
Leukotriene synthesis	1	9	0.344828	2.43128	0.34629	1	1	1	ZFP36;
Cholesterol biosynthesis	1	20	0.344828	1.09474	0.611513	1	1	1	SQLE;
Bile acid and bile salt metabolism	4	27	1.37931	3.22002	0.0336273	1	0.449131	1	CYP7A1; AMACR; SLCO1A2; CH25H;
Synthesis of bile acids and bile salts	3	19	1.03448	3.43418	0.0543872	1	0.671731	1	CYP7A1; AMACR; CH25H;
Synthesis of bile acids and bile salts via 7alpha-hydroxycholesterol	2	15	0.689655	2.90438	0.150088	1	1	1	CYP7A1; AMACR;
Synthesis of bile acids and bile salts via 24-hydroxycholesterol	1	10	0.344828	2.18839	0.376472	1	1	1	AMACR;
Metabolism of steroid hormones and vitamins A and D	1	32	0.344828	0.684343	0.780033	1	1	1	SRD5A2;
Recycling of bile acids and salts	1	11	0.344828	1.98963	0.405266	1	1	1	SLCO1A2;
Beta-oxidation of pristanoyl-CoA	1	8	0.344828	2.73481	0.314652	1	1	1	AMACR;
Regulation of Lipid Metabolism by Peroxisome proliferator-activated receptor alpha (PPARalpha)	5	32	1.72414	3.39461	0.0145575	1	0.233479	1	CYP7A1; ME1; FADS1; GRHL1; UGT1A9;
Peroxisomal lipid metabolism	1	20	0.344828	1.09474	0.611513	1	1	1	AMACR;
Nucleotide Excision Repair	1	49	0.344828	0.446967	0.901919	1	1	1	RFC1;
Global Genomic NER (GG-NER)	1	33	0.344828	0.663612	0.790226	1	1	1	RFC1;
Homologous Recombination Repair	1	22	0.344828	0.995267	0.646621	1	1	1	BRCA1;
Double-Strand Break Repair	1	27	0.344828	0.811027	0.721169	1	1	1	BRCA1;
ATM mediated response to DNA double-strand break	1	6	0.344828	3.6449	0.246725	1	1	1	BRCA1;
Homologous recombination repair of replication-independent double-strand breaks	1	22	0.344828	0.995267	0.646621	1	1	1	BRCA1;
ATM mediated phosphorylation of repair proteins	1	6	0.344828	3.6449	0.246725	1	1	1	BRCA1;
Recruitment of repair and signaling proteins to double-strand breaks	1	8	0.344828	2.73481	0.314652	1	1	1	BRCA1;
Metabolism	16	823	5.51724	0.421915	0.999995	1	1	1	FMO1; TYMS; CYP7A1; SKP2; NAGS; UGT1A6; ACSM1; PTGS2; NAMPT; ZFP36; SLC2A3; DHODH; AMD1; BBOX1; TDO2; UGT1A1;
Metabolism of nucleotides	2	58	0.689655	0.751504	0.755258	1	1	1	TYMS; DHODH;
Repair synthesis of patch ~27-30 bases long by DNA polymerase	1	15	0.344828	1.45942	0.507781	1	1	1	RFC1;
Fanconi Anemia pathway	3	22	1.03448	2.96609	0.0781961	1	0.836096	1	FANCL; BRCA1; UBE2T;
Repair synthesis for gap-filling by DNA polymerase in TC-NER	1	15	0.344828	1.45942	0.507781	1	1	1	RFC1;
Gap-filling DNA repair synthesis and ligation in TC-NER	1	16	0.344828	1.36826	0.530529	1	1	1	RFC1;
Transcription-coupled NER (TC-NER)	1	44	0.344828	0.497747	0.87559	1	1	1	RFC1;
Gap-filling DNA repair synthesis and ligation in GG-NER	1	16	0.344828	1.36826	0.530529	1	1	1	RFC1;
Stabilization of p53	1	69	0.344828	0.31743	0.962186	1	1	1	SKP2;
p53-Dependent G1 DNA Damage Response	2	72	0.689655	0.605399	0.851835	1	1	1	SKP2; CDKN1A;
p53-Dependent G1/S DNA damage checkpoint	2	72	0.689655	0.605399	0.851835	1	1	1	SKP2; CDKN1A;
G1/S DNA Damage Checkpoints	2	76	0.689655	0.57354	0.872244	1	1	1	SKP2; CDKN1A;
Cell Cycle Checkpoints	2	118	0.689655	0.369416	0.975378	1	1	1	SKP2; CDKN1A;
Pausing and recovery of elongation	1	31	0.344828	0.706412	0.769346	1	1	1	ELL;
Autodegradation of the E3 ubiquitin ligase COP1	1	68	0.344828	0.322097	0.960337	1	1	1	SKP2;
Transcriptional activation of p53 responsive genes	1	2	0.344828	10.8984	0.0900912	1	0.878784	1	CDKN1A;
p53-Independent G1/S DNA damage checkpoint	1	70	0.344828	0.312896	0.963949	1	1	1	SKP2;
Transcriptional activation of cell cycle inhibitor p21	1	2	0.344828	10.8984	0.0900912	1	0.878784	1	CDKN1A;
Ubiquitin Mediated Degradation of Phosphorylated Cdc25A	1	69	0.344828	0.31743	0.962186	1	1	1	SKP2;
p53-Independent DNA Damage Response	1	70	0.344828	0.312896	0.963949	1	1	1	SKP2;
Synthesis of substrates in N-glycan biosythesis	1	16	0.344828	1.36826	0.530529	1	1	1	GFPT2;
Biosynthesis of the N-glycan precursor (dolichol lipid-linked oligosaccharide, LLO) and transfer to a nascent protein	1	30	0.344828	0.729951	0.758141	1	1	1	GFPT2;
Post-translational modification: synthesis of GPI-anchored proteins	1	26	0.344828	0.842208	0.707633	1	1	1	PLAUR;
Asparagine N-linked glycosylation	1	77	0.344828	0.284454	0.974195	1	1	1	GFPT2;
Attachment of GPI anchor to uPAR	1	7	0.344828	3.12494	0.281488	1	1	1	PLAUR;
Synthesis of UDP-N-acetyl-glucosamine	1	5	0.344828	4.37242	0.210286	1	1	1	GFPT2;
Post-chaperonin tubulin folding pathway	1	12	0.344828	1.82397	0.432734	1	1	1	TUBB6;
Post-translational protein modification	2	114	0.689655	0.382377	0.971034	1	1	1	PLAUR; GFPT2;
Protein folding	1	28	0.344828	0.782072	0.73408	1	1	1	TUBB6;
Ribosomal scanning and start codon recognition	1	54	0.344828	0.405588	0.922691	1	1	1	EIF5;
GTP hydrolysis and joining of the 60S ribosomal subunit	1	103	0.344828	0.212657	0.992573	1	1	1	EIF5;
Translation	1	117	0.344828	0.187213	0.99621	1	1	1	EIF5;
Eukaryotic Translation Initiation	1	110	0.344828	0.199126	0.994693	1	1	1	EIF5;
Cap-dependent Translation Initiation	1	110	0.344828	0.199126	0.994693	1	1	1	EIF5;
Metabolism of proteins	4	259	1.37931	0.335789	0.998253	1	1	1	PLAUR; TUBB6; GFPT2; EIF5;
Meiotic Synapsis	1	47	0.344828	0.465982	0.89213	1	1	1	BRCA1;
Meiotic Recombination	2	42	0.689655	1.03772	0.583534	1	1	1	MND1; BRCA1;
Meiosis	2	72	0.689655	0.605399	0.851835	1	1	1	MND1; BRCA1;
Regulation of gap junction activity	1	2	0.344828	10.8984	0.0900912	1	0.878784	1	GJA1;
c-src mediated regulation of Cx43 function and closure of gap junctions	1	2	0.344828	10.8984	0.0900912	1	0.878784	1	GJA1;
Oligomerization of connexins into connexons	1	3	0.344828	7.27768	0.132056	1	1	1	GJA1;
Microtubule-dependent trafficking of connexons from Golgi to the plasma membrane	1	1	0.344828	21.6889	0.0461049	1	0.587046	1	GJA1;
Transport of connexons to the plasma membrane	1	2	0.344828	10.8984	0.0900912	1	0.878784	1	GJA1;
Gap junction trafficking and regulation	1	6	0.344828	3.6449	0.246725	1	1	1	GJA1;
Gap junction trafficking	1	5	0.344828	4.37242	0.210286	1	1	1	GJA1;
Gap junction assembly	1	4	0.344828	5.4628	0.172091	1	1	1	GJA1;
Transport of connexins along the secretory pathway	1	1	0.344828	21.6889	0.0461049	1	0.587046	1	GJA1;
trans-Golgi Network Vesicle Budding	1	33	0.344828	0.663612	0.790226	1	1	1	AP1S1;
Clathrin derived vesicle budding	1	33	0.344828	0.663612	0.790226	1	1	1	AP1S1;
Golgi Associated Vesicle Biogenesis	1	27	0.344828	0.811027	0.721169	1	1	1	AP1S1;
Lysosome Vesicle Biogenesis	1	15	0.344828	1.45942	0.507781	1	1	1	AP1S1;
FMO oxidizes nucleophiles	1	3	0.344828	7.27768	0.132056	1	1	1	FMO1;
COX reactions	1	1	0.344828	21.6889	0.0461049	1	0.587046	1	PTGS2;
Glucuronidation	2	6	0.689655	7.25371	0.0280931	1	0.390494	1	UGT1A6; UGT1A1;
Phase II conjugation	3	39	1.03448	1.67351	0.26731	1	1	1	UGT1A6; ACSM1; UGT1A1;
Membrane Trafficking	2	84	0.689655	0.518924	0.905524	1	1	1	AP1S1; GJA1;
Conjugation of carboxylic acids	1	3	0.344828	7.27768	0.132056	1	1	1	ACSM1;
Amino Acid conjugation	1	3	0.344828	7.27768	0.132056	1	1	1	ACSM1;
Conjugation of phenylacetate with glutamine	1	2	0.344828	10.8984	0.0900912	1	0.878784	1	ACSM1;
Conjugation of benzoate with glycine	1	3	0.344828	7.27768	0.132056	1	1	1	ACSM1;
Regulation of ornithine decarboxylase (ODC)	1	70	0.344828	0.312896	0.963949	1	1	1	SKP2;
Metabolism of polyamines	1	15	0.344828	1.45942	0.507781	1	1	1	AMD1;
Carnitine synthesis	1	4	0.344828	5.4628	0.172091	1	1	1	BBOX1;
Urea cycle	1	9	0.344828	2.43128	0.34629	1	1	1	NAGS;
Tryptophan catabolism	1	11	0.344828	1.98963	0.405266	1	1	1	TDO2;
Heme degradation	1	3	0.344828	7.27768	0.132056	1	1	1	UGT1A1;
Biological oxidations	6	98	2.06897	1.32997	0.297462	1	1	1	FMO1; CYP7A1; UGT1A6; ACSM1; PTGS2; UGT1A1;
Metabolism of porphyrins	1	10	0.344828	2.18839	0.376472	1	1	1	UGT1A1;
Endogenous sterols	1	15	0.344828	1.45942	0.507781	1	1	1	CYP7A1;
Phase 1 - Functionalization of compounds	3	60	1.03448	1.08788	0.527681	1	1	1	FMO1; CYP7A1; PTGS2;
Cytochrome P450 - arranged by substrate type	1	48	0.344828	0.456276	0.89714	1	1	1	CYP7A1;
Destabilization of mRNA by Butyrate Response Factor 1 (BRF1)	1	20	0.344828	1.09474	0.611513	1	1	1	ZFP36;
Destabilization of mRNA by Tristetraprolin (TTP)	1	17	0.344828	1.28782	0.552229	1	1	1	ZFP36;
Regulation of mRNA Stability by Proteins that Bind AU-rich Elements	2	104	0.689655	0.41914	0.956714	1	1	1	SKP2; ZFP36;
Destabilization of mRNA by AUF1 (hnRNP D0)	1	71	0.344828	0.308489	0.965629	1	1	1	SKP2;
Metabolism of mRNA	2	234	0.689655	0.186294	0.999836	1	1	1	SKP2; ZFP36;
Metabolism of RNA	2	281	0.689655	0.155136	0.999981	1	1	1	SKP2; ZFP36;
Metabolism of amino acids and derivatives	5	188	1.72414	0.577956	0.939834	1	1	1	SKP2; NAGS; AMD1; BBOX1; TDO2;
Nicotinate metabolism	1	8	0.344828	2.73481	0.314652	1	1	1	NAMPT;
Nicotinamide salvaging	1	2	0.344828	10.8984	0.0900912	1	0.878784	1	NAMPT;
Metabolism of vitamins and cofactors	2	47	0.689655	0.927351	0.645191	1	1	1	NAMPT; SLC2A3;
Metabolism of water-soluble vitamins and cofactors	2	47	0.689655	0.927351	0.645191	1	1	1	NAMPT; SLC2A3;
Vitamin C (ascorbate) metabolism	1	6	0.344828	3.6449	0.246725	1	1	1	SLC2A3;
Glucose transport	1	38	0.344828	0.576318	0.83455	1	1	1	GCK;
Regulation of Glucokinase by Glucokinase Regulatory Protein	1	29	0.344828	0.755113	0.746395	1	1	1	GCK;
Hexose transport	1	40	0.344828	0.547509	0.849544	1	1	1	GCK;
BMAL1:CLOCK/NPAS2 Activates Gene Expression	4	23	1.37931	3.77978	0.0195835	1	0.290214	1	DBP; SERPINE1; ARNTL2; BHLHE40;
Metabolism of carbohydrates	1	92	0.344828	0.238081	0.987412	1	1	1	GCK;
Circadian Clock	4	32	1.37931	2.71705	0.0576801	1	0.702266	1	DBP; SERPINE1; ARNTL2; BHLHE40;
Fatty acid, triacylglycerol, and ketone body metabolism	6	83	2.06897	1.5703	0.182988	1	1	1	CYP7A1; ME1; GPAM; FADS1; GRHL1; UGT1A9;
Triglyceride Biosynthesis	1	28	0.344828	0.782072	0.73408	1	1	1	GPAM;
Trafficking of dietary sterols	1	3	0.344828	7.27768	0.132056	1	1	1	ABCG8;
Hormone-sensitive lipase (HSL)-mediated triacylglycerol hydrolysis	2	12	0.689655	3.62987	0.103115	1	0.982838	1	FABP4; PLIN1;
Cell-cell junction organization	2	45	0.689655	0.968557	0.621432	1	1	1	CDH15; PVR;
Cell-Cell communication	5	117	1.72414	0.928652	0.633132	1	1	1	CDH15; PVR; RAC1; FLNC; LAMC2;
Cell junction organization	4	69	1.37931	1.26029	0.394396	1	1	1	CDH15; PVR; FLNC; LAMC2;
Transmembrane transport of small molecules	16	378	5.51724	0.9186	0.67771	1	1	1	SLC29A1; SLC12A1; ABCC5; SLC22A7; ABCC6; SLC22A11; GCK; ABCG8; SLC2A3; ATP2B4; SLC11A1; SLC22A4; SLC7A2; SLCO1A2; SLC7A1; SLC3A1;
Transport of inorganic cations/anions and amino acids/oligopeptides	4	94	1.37931	0.925143	0.636278	1	1	1	SLC12A1; SLC7A2; SLC7A1; SLC3A1;
SLC-mediated transmembrane transport	12	247	4.13793	1.05455	0.468841	1	1	1	SLC29A1; SLC12A1; SLC22A7; SLC22A11; GCK; SLC2A3; SLC11A1; SLC22A4; SLC7A2; SLCO1A2; SLC7A1; SLC3A1;
ABC-family proteins mediated transport	3	25	1.03448	2.6103	0.105741	1	0.996471	1	ABCC5; ABCC6; ABCG8;
ABCA transporters in lipid homeostasis	1	9	0.344828	2.43128	0.34629	1	1	1	ABCG8;
Cation-coupled Chloride cotransporters	1	7	0.344828	3.12494	0.281488	1	1	1	SLC12A1;
Type I hemidesmosome assembly	1	8	0.344828	2.73481	0.314652	1	1	1	LAMC2;
Adherens junctions interactions	2	27	0.689655	1.61402	0.35571	1	1	1	CDH15; PVR;
Nectin/Necl trans heterodimerization	1	7	0.344828	3.12494	0.281488	1	1	1	PVR;
Cell-extracellular matrix interactions	1	16	0.344828	1.36826	0.530529	1	1	1	FLNC;
DSCAM interactions	1	9	0.344828	2.43128	0.34629	1	1	1	RAC1;
Metal ion SLC transporters	1	25	0.344828	0.875883	0.693443	1	1	1	SLC11A1;
Amino acid transport across the plasma membrane	3	31	1.03448	2.10525	0.169844	1	1	1	SLC7A2; SLC7A1; SLC3A1;
Transport of glucose and other sugars, bile salts and organic acids, metal ions and amine compounds	5	94	1.72414	1.15585	0.438029	1	1	1	SLC22A7; SLC22A11; SLC2A3; SLC11A1; SLC22A4;
Facilitative Na+-independent glucose transporters	1	12	0.344828	1.82397	0.432734	1	1	1	SLC2A3;
Ion channel transport	1	46	0.344828	0.47611	0.886875	1	1	1	ATP2B4;
Lipid digestion, mobilization, and transport	3	46	1.03448	1.4189	0.356795	1	1	1	FABP4; ABCG8; PLIN1;
Metabolism of lipids and lipoproteins	18	257	6.2069	1.51985	0.0493451	1	0.614236	1	CYP7A1; ME1; GPAM; AMACR; FABP4; FADS1; ABCG8; SPHK2; PTGS2; ZFP36; SLCO1A2; GRHL1; CH25H; PLIN1; SGMS2; SRD5A2; UGT1A9; SQLE;
Ion transport by P-type ATPases	1	29	0.344828	0.755113	0.746395	1	1	1	ATP2B4;
Organic cation/anion/zwitterion transport	3	12	1.03448	5.43578	0.0156482	1	0.248583	1	SLC22A7; SLC22A11; SLC22A4;
Organic cation transport	1	7	0.344828	3.12494	0.281488	1	1	1	SLC22A4;
Organic anion transport	2	5	0.689655	8.70155	0.0193116	1	0.290214	1	SLC22A7; SLC22A11;
Transport of vitamins, nucleosides, and related molecules	2	30	0.689655	1.45267	0.405743	1	1	1	SLC29A1; SLCO1A2;
Transport of nucleosides and free purine and pyrimidine bases across the plasma membrane	1	7	0.344828	3.12494	0.281488	1	1	1	SLC29A1;
Transport of organic anions	1	10	0.344828	2.18839	0.376472	1	1	1	SLCO1A2;
PD-1 signaling	2	12	0.689655	3.62987	0.103115	1	0.982838	1	CD3G; CD274;
Class I MHC mediated antigen processing & presentation	4	101	1.37931	0.86103	0.691806	1	1	1	SKP2; HLA-C; CTSS; ERAP2;
Antigen processing: Ubiquitination & Proteasome degradation	1	69	0.344828	0.31743	0.962186	1	1	1	SKP2;
CD28 co-stimulation	3	36	1.03448	1.81293	0.229715	1	1	1	MAP3K8; MAP3K14; RAC1;
CD28 dependent PI3K/Akt signaling	2	17	0.689655	2.56289	0.183327	1	1	1	MAP3K8; MAP3K14;
CD28 dependent Vav1 pathway	1	18	0.344828	1.21631	0.57293	1	1	1	RAC1;
Generation of second messenger molecules	1	19	0.344828	1.15233	0.592676	1	1	1	CD3G;
Downstream TCR signaling	1	32	0.344828	0.684343	0.780033	1	1	1	CD3G;
Costimulation by the CD28 family	5	52	1.72414	2.08924	0.0899272	1	0.878784	1	CD3G; MAP3K8; MAP3K14; CD274; RAC1;
Transcription	1	178	0.344828	0.12306	0.999802	1	1	1	ELL;
Regulation of Apoptosis	1	75	0.344828	0.292039	0.971607	1	1	1	SKP2;
Regulation of activated PAK-2p34 by proteasome mediated degradation	1	66	0.344828	0.331856	0.956365	1	1	1	SKP2;
Cdc20:Phospho-APC/C mediated degradation of Cyclin A	1	69	0.344828	0.31743	0.962186	1	1	1	SKP2;
Apoptotic cleavage of cellular proteins	2	39	0.689655	1.11753	0.542921	1	1	1	CASP7; TJP2;
Apoptotic cleavage of cell adhesion proteins	1	12	0.344828	1.82397	0.432734	1	1	1	TJP2;
SMAC binds to IAPs	1	5	0.344828	4.37242	0.210286	1	1	1	CASP7;
SMAC-mediated apoptotic response	1	5	0.344828	4.37242	0.210286	1	1	1	CASP7;
Apoptotic execution phase	2	48	0.689655	0.908035	0.656622	1	1	1	CASP7; TJP2;
SMAC-mediated dissociation of IAP:caspase complexes	1	5	0.344828	4.37242	0.210286	1	1	1	CASP7;
Apoptotic factor-mediated response	1	7	0.344828	3.12494	0.281488	1	1	1	CASP7;
Activation of caspases through apoptosome-mediated cleavage	1	5	0.344828	4.37242	0.210286	1	1	1	CASP7;
Cytochrome c-mediated apoptotic response	1	5	0.344828	4.37242	0.210286	1	1	1	CASP7;
Caspase-8 is formed from procaspase-8	1	9	0.344828	2.43128	0.34629	1	1	1	TNFSF10;
TRAIL signaling	1	6	0.344828	3.6449	0.246725	1	1	1	TNFSF10;
Intrinsic Pathway for Apoptosis	1	31	0.344828	0.706412	0.769346	1	1	1	CASP7;
Activation of Pro-Caspase 8	1	9	0.344828	2.43128	0.34629	1	1	1	TNFSF10;
TNF signaling	1	7	0.344828	3.12494	0.281488	1	1	1	TNFRSF1A;
Death Receptor Signalling	2	13	0.689655	3.35087	0.118289	1	1	1	TNFSF10; TNFRSF1A;
Extrinsic Pathway for Apoptosis	2	13	0.689655	3.35087	0.118289	1	1	1	TNFSF10; TNFRSF1A;
Apoptosis	5	158	1.72414	0.687688	0.860903	1	1	1	SKP2; TNFSF10; TNFRSF1A; CASP7; TJP2;
Steroid hormones	1	25	0.344828	0.875883	0.693443	1	1	1	SRD5A2;
Growth hormone receptor signaling	5	18	1.72414	6.0334	0.00104986	1	0.022992	0.10532	SOCS3; SOCS2; CISH; SOCS1; IRS2;
Interleukin-6 signaling	2	8	0.689655	5.44254	0.0493409	1	0.614236	1	SOCS3; IL6;
TRIF mediated TLR3 signaling	5	56	1.72414	1.94004	0.114367	1	1	1	TLR3; FOS; JUN; NFKB2; RPS6KA5;
Toll Like Receptor 3 (TLR3) Cascade	5	56	1.72414	1.94004	0.114367	1	1	1	TLR3; FOS; JUN; NFKB2; RPS6KA5;
Viral dsRNA:TLR3:TRIF Complex Activates TBK1/IKK epsilon	1	6	0.344828	3.6449	0.246725	1	1	1	TLR3;
Viral dsRNA:TLR3:TRIF Complex Activates RIP1	2	13	0.689655	3.35087	0.118289	1	1	1	TLR3; NFKB2;
TRAF6 Mediated Induction of proinflammatory cytokines	5	50	1.72414	2.1728	0.0788393	1	0.837605	1	TLR3; FOS; JUN; NFKB2; RPS6KA5;
Toll Like Receptor 5 (TLR5) Cascade	5	60	1.72414	1.81072	0.141629	1	1	1	FOS; JUN; PELI1; NFKB2; RPS6KA5;
Toll Like Receptor 7/8 (TLR7/8) Cascade	6	62	2.06897	2.10209	0.0647564	1	0.755341	1	TLR7; FOS; JUN; PELI1; NFKB2; RPS6KA5;
MyD88 dependent cascade initiated on endosome	5	60	1.72414	1.81072	0.141629	1	1	1	FOS; JUN; PELI1; NFKB2; RPS6KA5;
TRAF6 mediated induction of NFkB and MAP kinases upon TLR7/8 or 9 activation	5	59	1.72414	1.84141	0.134564	1	1	1	FOS; JUN; PELI1; NFKB2; RPS6KA5;
IRAK1 recruits IKK complex upon TLR7/8 or 9 stimulation	1	10	0.344828	2.18839	0.376472	1	1	1	PELI1;
Toll Like Receptor 9 (TLR9) Cascade	5	65	1.72414	1.67146	0.179226	1	1	1	FOS; JUN; PELI1; NFKB2; RPS6KA5;
Activated TLR4 signalling	6	72	2.06897	1.81017	0.113419	1	1	1	FOS; JUN; PELI1; IRAK3; NFKB2; RPS6KA5;
MyD88:Mal cascade initiated on plasma membrane	6	62	2.06897	2.10209	0.0647564	1	0.755341	1	FOS; JUN; PELI1; IRAK3; NFKB2; RPS6KA5;
Toll Like Receptor 4 (TLR4) Cascade	6	76	2.06897	1.71491	0.136934	1	1	1	FOS; JUN; PELI1; IRAK3; NFKB2; RPS6KA5;
NFkB and MAP kinases activation mediated by TLR4 signaling repertoire	4	54	1.37931	1.61031	0.237048	1	1	1	FOS; JUN; NFKB2; RPS6KA5;
MyD88-independent cascade initiated on plasma membrane	4	58	1.37931	1.49927	0.278058	1	1	1	FOS; JUN; NFKB2; RPS6KA5;
Innate Immune System	9	183	3.10345	1.0678	0.470473	1	1	1	TLR7; TLR3; FOS; JUN; PELI1; IRAK3; NFKB2; RNF125; RPS6KA5;
Toll Receptor Cascades	8	90	2.75862	1.9301	0.0547694	1	0.671731	1	TLR7; TLR3; FOS; JUN; PELI1; IRAK3; NFKB2; RPS6KA5;
Endosomal/Vacuolar pathway	2	9	0.689655	4.83849	0.0615463	1	0.733281	1	HLA-C; CTSS;
Cross-presentation of soluble exogenous antigens (endosomes)	1	67	0.344828	0.326904	0.958399	1	1	1	SKP2;
Immunoregulatory interactions between a Lymphoid and a non-Lymphoid cell	4	52	1.37931	1.67223	0.217121	1	1	1	CD3G; PVR; HLA-C; SELL;
Antigen Presentation: Folding, assembly and peptide loading of class I MHC	2	23	0.689655	1.8946	0.286928	1	1	1	HLA-C; ERAP2;
Antigen processing-Cross presentation	3	86	1.03448	0.759025	0.765607	1	1	1	SKP2; HLA-C; CTSS;
ER-Phagosome pathway	2	80	0.689655	0.544867	0.890043	1	1	1	SKP2; HLA-C;
Toll Like Receptor 10 (TLR10) Cascade	5	60	1.72414	1.81072	0.141629	1	1	1	FOS; JUN; PELI1; NFKB2; RPS6KA5;
Activation of the AP-1 family of transcription factors	2	9	0.689655	4.83849	0.0615463	1	0.733281	1	FOS; JUN;
MAPK targets/ Nuclear events mediated by MAP kinases	3	21	1.03448	3.10727	0.0698199	1	0.808747	1	FOS; JUN; RPS6KA5;
MAP kinase activation in TLR cascade	3	30	1.03448	2.1754	0.158468	1	1	1	FOS; JUN; RPS6KA5;
TAK1 activates NFkB by phosphorylation and activation of IKKs complex	1	11	0.344828	1.98963	0.405266	1	1	1	NFKB2;
MyD88 cascade initiated on plasma membrane	5	59	1.72414	1.84141	0.134564	1	1	1	FOS; JUN; PELI1; NFKB2; RPS6KA5;
IRAK1 recruits IKK complex	1	10	0.344828	2.18839	0.376472	1	1	1	PELI1;
RIG-I/MDA5 mediated induction of IFN-alpha/beta pathways	2	67	0.689655	0.650571	0.822181	1	1	1	NFKB2; RNF125;
TRAF6 mediated NF-kB activation	1	13	0.344828	1.68377	0.458938	1	1	1	NFKB2;
Cytokine Signaling in Immune system	25	193	8.62069	2.81043	2.21436e-06	0.00369355	8.58964e-05	0.000393469	IFIT3; IFIT2; OAS1; OAS2; USP18; IFI6; SOCS3; SOCS2; MAP3K8; PELI1; EGR1; IL6; CISH; IRAK3; SOCS1; IL1B; IL1RN; NFKB2; IRS2; IRF1; HLA-C; CD44; CSF2RB; ICAM1; IFNGR1;
Negative regulators of RIG-I/MDA5 signaling	1	28	0.344828	0.782072	0.73408	1	1	1	RNF125;
Interferon alpha/beta signaling	11	77	3.7931	3.10083	0.000728273	1	0.0168717	0.0772846	IFIT3; IFIT2; OAS1; OAS2; USP18; IFI6; SOCS3; EGR1; SOCS1; IRF1; HLA-C;
Interferon Signaling	14	98	4.82759	3.10032	0.000141164	0.235462	0.00411119	0.0188323	IFIT3; IFIT2; OAS1; OAS2; USP18; IFI6; SOCS3; EGR1; SOCS1; IRF1; HLA-C; CD44; ICAM1; IFNGR1;
Interferon gamma signaling	9	47	3.10345	4.15693	0.000240977	0.40195	0.00618385	0.0283266	OAS1; OAS2; SOCS3; SOCS1; IRF1; HLA-C; CD44; ICAM1; IFNGR1;
Regulation of IFNG signaling	3	13	1.03448	5.01796	0.0196608	1	0.290214	1	SOCS3; SOCS1; IFNGR1;
Regulation of IFNA signaling	3	38	1.03448	1.71754	0.254683	1	1	1	USP18; SOCS3; SOCS1;
Interleukin-1 signaling	5	39	1.72414	2.78548	0.0320827	1	0.435072	1	MAP3K8; PELI1; IRAK3; IL1B; IL1RN;
Signaling by Interleukins	9	92	3.10345	2.12387	0.0252538	1	0.363132	1	SOCS3; MAP3K8; PELI1; IL6; IRAK3; IL1B; IL1RN; NFKB2; CSF2RB;
Interleukin-1 processing	2	6	0.689655	7.25371	0.0280931	1	0.390494	1	IL1B; NFKB2;
Interleukin-3, 5 and GM-CSF signaling	1	29	0.344828	0.755113	0.746395	1	1	1	CSF2RB;
Toll Like Receptor 2 (TLR2) Cascade	6	65	2.06897	2.00508	0.0777742	1	0.836096	1	FOS; JUN; PELI1; IRAK3; NFKB2; RPS6KA5;
Toll Like Receptor TLR1:TLR2 Cascade	6	64	2.06897	2.03641	0.0732818	1	0.829358	1	FOS; JUN; PELI1; IRAK3; NFKB2; RPS6KA5;
Toll Like Receptor TLR6:TLR2 Cascade	6	64	2.06897	2.03641	0.0732818	1	0.829358	1	FOS; JUN; PELI1; IRAK3; NFKB2; RPS6KA5;
Nucleotide-binding domain, leucine rich repeat containing receptor (NLR) signaling pathways	1	43	0.344828	0.509319	0.869534	1	1	1	NFKB2;
Inflammasomes	1	17	0.344828	1.28782	0.552229	1	1	1	NFKB2;
protein citrullination	1	5	0.344828	4.37242	0.210286	1	1	1	PADI4;
GDP-glucose biosynthesis	1	4	0.344828	5.4628	0.172091	1	1	1	GCK;
heparan sulfate biosynthesis	1	23	0.344828	0.952014	0.662971	1	1	1	HS3ST3B1;
heparan sulfate biosynthesis (late stages)	1	16	0.344828	1.36826	0.530529	1	1	1	HS3ST3B1;
NAD biosynthesis II (from tryptophan)	1	10	0.344828	2.18839	0.376472	1	1	1	TDO2;
NAD biosynthesis III	1	4	0.344828	5.4628	0.172091	1	1	1	NAMPT;
gamma-glutamyl cycle	1	9	0.344828	2.43128	0.34629	1	1	1	GGT1;
tetrahydrofolate salvage from 5,10-methenyltetrahydrofolate	1	4	0.344828	5.4628	0.172091	1	1	1	MTHFD2;
folate transformations	1	9	0.344828	2.43128	0.34629	1	1	1	MTHFD2;
prostanoid biosynthesis	1	9	0.344828	2.43128	0.34629	1	1	1	PTGS2;
androgen biosynthesis	1	8	0.344828	2.73481	0.314652	1	1	1	SRD5A2;
sphingomyelin metabolism	1	7	0.344828	3.12494	0.281488	1	1	1	SGMS2;
ceramide biosynthesis	1	5	0.344828	4.37242	0.210286	1	1	1	SPTLC3;
triacylglycerol biosynthesis	2	24	0.689655	1.81569	0.304269	1	1	1	GPAM; AGPAT9;
oleate biosynthesis II (animals)	3	7	1.03448	9.31294	0.00295598	1	0.0580067	0.265714	FADS1; FADS2; SCD;
CDP-diacylglycerol biosynthesis I	2	15	0.689655	2.90438	0.150088	1	1	1	GPAM; AGPAT9;
phosphatidylethanolamine biosynthesis II	1	6	0.344828	3.6449	0.246725	1	1	1	ETNK1;
phosphatidylglycerol biosynthesis II (non-plastidic)	2	16	0.689655	2.72297	0.166562	1	1	1	GPAM; AGPAT9;
cholesterol biosynthesis II (via 24,25-dihydrolanosterol)	1	13	0.344828	1.68377	0.458938	1	1	1	SQLE;
cholesterol biosynthesis I	1	13	0.344828	1.68377	0.458938	1	1	1	SQLE;
cholesterol biosynthesis III (via desmosterol)	1	13	0.344828	1.68377	0.458938	1	1	1	SQLE;
superpathway of cholesterol biosynthesis	1	25	0.344828	0.875883	0.693443	1	1	1	SQLE;
bile acid biosynthesis, neutral pathway	1	9	0.344828	2.43128	0.34629	1	1	1	CYP7A1;
L-carnitine biosynthesis	1	3	0.344828	7.27768	0.132056	1	1	1	BBOX1;
pyrimidine deoxyribonucleotides de novo biosynthesis	1	14	0.344828	1.56359	0.483935	1	1	1	TYMS;
salvage pathways of pyrimidine ribonucleotides	1	15	0.344828	1.45942	0.507781	1	1	1	UPP1;
epoxysqualene biosynthesis	1	2	0.344828	10.8984	0.0900912	1	0.878784	1	SQLE;
spermine biosynthesis	1	2	0.344828	10.8984	0.0900912	1	0.878784	1	AMD1;
histamine biosynthesis	1	1	0.344828	21.6889	0.0461049	1	0.587046	1	HDC;
spermidine biosynthesis	1	2	0.344828	10.8984	0.0900912	1	0.878784	1	AMD1;
UDP-N-acetyl-D-glucosamine biosynthesis II	1	5	0.344828	4.37242	0.210286	1	1	1	GFPT2;
inositol pyrophosphates biosynthesis	1	7	0.344828	3.12494	0.281488	1	1	1	IP6K3;
methylglyoxal degradation III	1	3	0.344828	7.27768	0.132056	1	1	1	AKR1B10;
histidine degradation III	1	7	0.344828	3.12494	0.281488	1	1	1	MTHFD2;
tryptophan degradation to 2-amino-3-carboxymuconate semialdehyde	1	5	0.344828	4.37242	0.210286	1	1	1	TDO2;
tryptophan degradation III (eukaryotic)	1	9	0.344828	2.43128	0.34629	1	1	1	TDO2;
glucose and glucose-1-phosphate degradation	1	4	0.344828	5.4628	0.172091	1	1	1	GCK;
trehalose degradation II (trehalase)	1	2	0.344828	10.8984	0.0900912	1	0.878784	1	GCK;
triacylglycerol degradation	1	14	0.344828	1.56359	0.483935	1	1	1	PNPLA3;
acetone degradation I (to methylglyoxal)	1	7	0.344828	3.12494	0.281488	1	1	1	AKR1B10;
glutathione-mediated detoxification	1	19	0.344828	1.15233	0.592676	1	1	1	GSTT1;
nicotine degradation II	1	11	0.344828	1.98963	0.405266	1	1	1	FMO1;
Validated transcriptional targets of TAp63 isoforms	3	54	1.03448	1.20873	0.456999	1	1	1	TP53I3; SPATA18; CDKN1A;
S1P5 pathway	1	8	0.344828	2.73481	0.314652	1	1	1	GNAO1;
Wnt signaling network	13	200	4.48276	1.4108	0.13218	1	1	1	WNT5A; PRKCZ; BRCA1; MYC; JUN; CYR61; KLF4; CMTM2; TMPRSS2; RAC1; MAK; VCAN; NFATC2;
Beta2 integrin cell surface interactions	3	28	1.03448	2.33073	0.136482	1	1	1	CYR61; PLAUR; ICAM1;
CXCR3-mediated signaling events	2	37	0.689655	1.17792	0.514361	1	1	1	CXCL9; GNAO1;
LPA4-mediated signaling events	2	16	0.689655	2.72297	0.166562	1	1	1	PRKCE; RPS6KA5;
Osteopontin-mediated events	6	29	2.06897	4.4933	0.00176324	1	0.0363097	0.166325	FOS; JUN; MAP3K14; RAC1; CD44; SPP1;
Regulation of cytoplasmic and nuclear SMAD2/3 signaling	29	305	10	2.06287	0.000142955	0.238449	0.00411119	0.0188323	PRKCZ; HNF4A; GADD45B; JUNB; FOS; MYC; PPP1R15A; JUN; GADD45G; PIM1; ATF3; MAP3K8; NR4A1; FOXO1; PTGS2; EGR1; FOSL1; EGR3; SERPINE1; IL10; CDKN1A; DUSP10; BATF3; RAC1; RCAN1; COL1A2; NFATC2; PRKCE; RPS6KA5;
IL2 signaling events mediated by STAT5	1	28	0.344828	0.782072	0.73408	1	1	1	MYC;
ErbB2/ErbB3 signaling events	4	38	1.37931	2.28815	0.0958723	1	0.929739	1	FOS; JUN; RAC1; NRG1;
Validated targets of C-MYC transcriptional repression	9	63	3.10345	3.10137	0.00219212	1	0.0440536	0.201798	WNT5A; CEBPA; BRCA1; MYC; CEBPD; SLC11A1; CDKN1A; COL1A2; TJP2;
IL6-mediated signaling events	11	47	3.7931	5.07967	6.52347e-06	0.0108811	0.000241803	0.00110764	JUNB; SOCS3; FOS; MYC; JUN; CEBPD; FOXO1; IL6; RAC1; IRF1; MCL1;
Signaling events mediated by the Hedgehog family	1	65	0.344828	0.336961	0.954233	1	1	1	GNAO1;
EphrinA-EPHA pathway	3	43	1.03448	1.51787	0.318365	1	1	1	EPHA1; EPHA2; RAC1;
Circadian rhythm pathway	1	16	0.344828	1.36826	0.530529	1	1	1	BHLHE40;
Canonical NF-kappaB pathway	4	35	1.37931	2.48422	0.0755508	1	0.834561	1	BCL3; TNFRSF1A; NFKB2; MAP3K14;
Signaling events mediated by HDAC Class I	5	113	1.72414	0.961522	0.602138	1	1	1	BCL6; FOXO1; TNFRSF1A; CDKN1A; MXD1;
EPHA forward signaling	2	31	0.689655	1.40583	0.422012	1	1	1	EPHA1; EPHA2;
Integrins in angiogenesis	6	64	2.06897	2.03641	0.0732818	1	0.829358	1	FOS; JUN; MAP3K14; RAC1; CD44; SPP1;
Syndecan-1-mediated signaling events	95	1297	32.7586	1.58878	4.94902e-07	0.000825497	2.17236e-05	9.95101e-05	TP53I3; WNT5A; PEG10; SKP2; PCBP4; CEBPA; PMS2; GPAM; PRKCZ; CD3G; FABP4; AFP; BRCA1; PIGR; GCK; RET; HNF4A; GNAO1; GADD45B; JUNB; FOSB; SOCS3; FOS; MYC; PPP1R15A; JUN; CEBPD; GADD45G; PIM1; FOSL2; CYR61; EPHA2; ATF3; MAP3K8; CCL2; BCL3; IL4R; BCL6; RALGDS; NR4A1; FOXO1; PTGS2; PLAUR; EGR1; IL6; FOSL1; PFKFB3; ZFP36; IGFBP1; TNFRSF1A; THBD; EGR3; SOCS1; KLF4; FPR1; SERPINE1; SLC11A1; IL10; GJA1; …
Downstream signaling in na&#xef;ve CD8+ T cells	8	65	2.75862	2.67233	0.00950042	1	0.161701	0.74071	CD3G; JUNB; FOS; JUN; EGR1; FOSL1; NFATC2; PRKCE;
Regulation of CDC42 activity	60	768	20.6897	1.69471	1.8712e-05	0.0312116	0.000650241	0.00297858	BCAR3; PRKCZ; CD3G; FABP4; AFP; BRCA1; GCK; HNF4A; GADD45B; JUNB; FOSB; SOCS3; FOS; MYC; PPP1R15A; JUN; CEBPD; GADD45G; PIM1; FOSL2; CYR61; ATF3; MAP3K8; CCL2; NR4A1; FOXO1; PTGS2; PLAUR; EGR1; IL6; FOSL1; PFKFB3; IGFBP1; THBD; EGR3; KLF4; SERPINE1; IL10; GJA1; CMTM2; LIF; CDKN1A; DUSP10; BATF3; TMPRSS2; RAC1; MAK; VCAN; IRF1; CIT; RCAN1; BHLHE40; COL1A2; FKBP5; ICAM1; MCL1; NFATC2; PRKCE; RPS6KA…
Notch-mediated HES/HEY network	4	94	1.37931	0.925143	0.636278	1	1	1	SKP2; MYC; CDKN1A; RCAN1;
Glypican pathway	96	1335	33.1034	1.55981	1.0092e-06	0.00168335	4.00797e-05	0.000183595	TP53I3; WNT5A; PEG10; SKP2; PCBP4; CEBPA; PMS2; GPAM; PRKCZ; CD3G; FABP4; AFP; BRCA1; PIGR; GCK; RET; HNF4A; GNAO1; GADD45B; JUNB; FOSB; SOCS3; FOS; MYC; PPP1R15A; JUN; CEBPD; GADD45G; PIM1; FOSL2; CYR61; EPHA2; ATF3; MAP3K8; CCL2; BCL3; IL4R; BCL6; RALGDS; NR4A1; FOXO1; PTGS2; PLAUR; EGR1; IL6; FOSL1; PFKFB3; ZFP36; IGFBP1; TNFRSF1A; THBD; EGR3; SOCS1; KLF4; FPR1; SERPINE1; SLC11A1; IL10; GJA1; …
Arf1 pathway	1	20	0.344828	1.09474	0.611513	1	1	1	RAC1;
GMCSF-mediated signaling events	98	1289	33.7931	1.64912	4.28371e-08	7.14523e-05	1.41987e-05	6.50406e-05	TP53I3; WNT5A; PEG10; SKP2; PCBP4; CEBPA; PMS2; GPAM; PRKCZ; CD3G; FABP4; AFP; BRCA1; PIGR; GCK; RET; HNF4A; GNAO1; GADD45B; JUNB; FOSB; SOCS3; FOS; MYC; PPP1R15A; JUN; CEBPD; GADD45G; PIM1; FOSL2; CYR61; EPHA2; ATF3; MAP3K8; CCL2; BCL3; IL4R; BCL6; RALGDS; NR4A1; FOXO1; PTGS2; PLAUR; EGR1; IL6; FOSL1; PFKFB3; ZFP36; CISH; IGFBP1; TNFRSF1A; THBD; EGR3; SOCS1; KLF4; FPR1; SERPINE1; SLC11A1; IL10; …
Validated transcriptional targets of deltaNp63 isoforms	3	64	1.03448	1.0199	0.571873	1	1	1	CEBPD; FOSL2; NRG1;
IL27-mediated signaling events	2	26	0.689655	1.67608	0.338688	1	1	1	IL6; IL1B;
Insulin Pathway	95	1285	32.7586	1.60362	3.1509e-07	0.00052557	1.86688e-05	8.55168e-05	TP53I3; WNT5A; PEG10; SKP2; PCBP4; CEBPA; PMS2; GPAM; PRKCZ; CD3G; FABP4; AFP; BRCA1; PIGR; GCK; RET; HNF4A; GNAO1; GADD45B; JUNB; FOSB; SOCS3; FOS; MYC; PPP1R15A; JUN; CEBPD; GADD45G; PIM1; FOSL2; CYR61; EPHA2; ATF3; MAP3K8; CCL2; BCL3; IL4R; BCL6; RALGDS; NR4A1; FOXO1; PTGS2; PLAUR; EGR1; IL6; FOSL1; PFKFB3; ZFP36; IGFBP1; TNFRSF1A; THBD; EGR3; SOCS1; KLF4; FPR1; SERPINE1; SLC11A1; IL10; GJA1; …
C-MYC pathway	14	149	4.82759	2.03921	0.00851748	1	0.149549	0.685045	WNT5A; PEG10; SKP2; CEBPA; GPAM; BRCA1; MYC; CEBPD; PIM1; FOSL1; SLC11A1; CDKN1A; COL1A2; TJP2;
Signaling events mediated by HDAC Class II	1	38	0.344828	0.576318	0.83455	1	1	1	BCL6;
Stabilization and expansion of the E-cadherin adherens junction	17	275	5.86207	1.34151	0.132058	1	1	1	BRCA1; RET; FOS; MYC; JUN; CYR61; EPHA2; PLAUR; KLF4; CMTM2; TMPRSS2; RAC1; MAK; VCAN; PLEKHA7; MEP1B; SPP1;
FOXA transcription factor networks	10	81	3.44828	2.67999	0.00382425	1	0.0716725	0.328313	CEBPA; AFP; BRCA1; GCK; HNF4A; FOS; JUN; CEBPD; IGFBP1; SERPINA1;
Glypican 3 network	13	206	4.48276	1.36971	0.154737	1	1	1	WNT5A; PRKCZ; BRCA1; MYC; JUN; CYR61; KLF4; CMTM2; TMPRSS2; RAC1; MAK; VCAN; NFATC2;
Nectin adhesion pathway	97	1292	33.4483	1.6285	1.00298e-07	0.000167297	1.74047e-05	7.97262e-05	TP53I3; WNT5A; PEG10; SKP2; PCBP4; CEBPA; PMS2; GPAM; PRKCZ; CD3G; FABP4; AFP; BRCA1; PIGR; GCK; RET; HNF4A; GNAO1; GADD45B; JUNB; FOSB; SOCS3; FOS; MYC; PPP1R15A; JUN; CEBPD; GADD45G; PIM1; FOSL2; CYR61; EPHA2; ATF3; MAP3K8; CCL2; BCL3; IL4R; BCL6; RALGDS; NR4A1; FOXO1; PTGS2; PLAUR; EGR1; IL6; FOSL1; PFKFB3; ZFP36; IGFBP1; TNFRSF1A; THBD; EGR3; SOCS1; KLF4; FPR1; SERPINE1; SLC11A1; IL10; GJA1; …
FGF signaling pathway	4	48	1.37931	1.81155	0.178824	1	1	1	FOS; JUN; PLAUR; SPP1;
Neurotrophic factor-mediated Trk receptor signaling	5	101	1.72414	1.07575	0.501166	1	1	1	PRKCZ; FOS; EGR1; RAC1; RPS6KA5;
Nephrin/Neph1 signaling in the kidney podocyte	3	25	1.03448	2.6103	0.105741	1	0.996471	1	PRKCZ; JUN; RAC1;
CD40/CD40L signaling	7	58	2.41379	2.62092	0.0164865	1	0.257005	1	MYC; JUN; BCL3; TNFRSF1A; NFKB2; MAP3K14; BIRC3;
TRAIL signaling pathway	100	1325	34.4828	1.63705	4.22453e-08	7.04651e-05	1.41987e-05	6.50406e-05	TP53I3; WNT5A; PEG10; SKP2; PCBP4; CEBPA; PMS2; TNFSF10; GPAM; PRKCZ; CD3G; FABP4; AFP; BRCA1; PIGR; GCK; RET; SPHK2; HNF4A; GNAO1; GADD45B; JUNB; FOSB; SOCS3; FOS; MYC; PPP1R15A; JUN; CEBPD; GADD45G; PIM1; FOSL2; CYR61; EPHA2; ATF3; MAP3K8; CCL2; BCL3; IL4R; BCL6; RALGDS; NR4A1; FOXO1; PTGS2; PLAUR; EGR1; IL6; FOSL1; PFKFB3; ZFP36; IGFBP1; TNFRSF1A; THBD; EGR3; SOCS1; KLF4; FPR1; CASP4; SERPINE1…
LPA receptor mediated events	13	100	4.48276	2.82145	0.000622757	1	0.0148394	0.0679755	GNAO1; FOS; JUN; HBEGF; BCL3; IL6; TNFRSF1A; LPAR1; NFKB2; MAP3K14; RAC1; PRKCE; RPS6KA5;
IGF1 pathway	95	1288	32.7586	1.59988	3.53067e-07	0.000588915	1.89973e-05	8.70215e-05	TP53I3; WNT5A; PEG10; SKP2; PCBP4; CEBPA; PMS2; GPAM; PRKCZ; CD3G; FABP4; AFP; BRCA1; PIGR; GCK; RET; HNF4A; GNAO1; GADD45B; JUNB; FOSB; SOCS3; FOS; MYC; PPP1R15A; JUN; CEBPD; GADD45G; PIM1; FOSL2; CYR61; EPHA2; ATF3; MAP3K8; CCL2; BCL3; IL4R; BCL6; RALGDS; NR4A1; FOXO1; PTGS2; PLAUR; EGR1; IL6; FOSL1; PFKFB3; ZFP36; IGFBP1; TNFRSF1A; THBD; EGR3; SOCS1; KLF4; FPR1; SERPINE1; SLC11A1; IL10; GJA1; …
PLK1 signaling events	6	104	2.06897	1.25325	0.346835	1	1	1	NINL; BRCA1; BCL3; TNFRSF1A; NFKB2; MAP3K14;
Lissencephaly gene (LIS1) in neuronal migration and development	1	31	0.344828	0.706412	0.769346	1	1	1	RAC1;
ATF-2 transcription factor network	8	59	2.75862	2.94405	0.00529417	1	0.0959856	0.439685	BRCA1; JUNB; SOCS3; FOS; JUN; ATF3; IL6; DUSP10;
HIF-1-alpha transcription factor network	9	66	3.10345	2.96042	0.00303839	1	0.0589307	0.269946	GCK; HNF4A; FOS; JUN; PFKFB3; IGFBP1; SERPINE1; BHLHE40; MCL1;
CDC42 signaling events	59	755	20.3448	1.69516	2.21869e-05	0.0370078	0.000755261	0.00345965	PRKCZ; CD3G; FABP4; AFP; BRCA1; GCK; HNF4A; GADD45B; JUNB; FOSB; SOCS3; FOS; MYC; PPP1R15A; JUN; CEBPD; GADD45G; PIM1; FOSL2; CYR61; ATF3; MAP3K8; CCL2; NR4A1; FOXO1; PTGS2; PLAUR; EGR1; IL6; FOSL1; PFKFB3; IGFBP1; THBD; EGR3; KLF4; SERPINE1; IL10; GJA1; CMTM2; LIF; CDKN1A; DUSP10; BATF3; TMPRSS2; RAC1; MAK; VCAN; IRF1; CIT; RCAN1; BHLHE40; COL1A2; FKBP5; ICAM1; MCL1; NFATC2; PRKCE; RPS6KA5; SGK1;
Signaling events mediated by Hepatocyte Growth Factor Receptor (c-Met)	95	1290	32.7586	1.5974	3.80764e-07	0.000635114	1.92459e-05	8.81603e-05	TP53I3; WNT5A; PEG10; SKP2; PCBP4; CEBPA; PMS2; GPAM; PRKCZ; CD3G; FABP4; AFP; BRCA1; PIGR; GCK; RET; HNF4A; GNAO1; GADD45B; JUNB; FOSB; SOCS3; FOS; MYC; PPP1R15A; JUN; CEBPD; GADD45G; PIM1; FOSL2; CYR61; EPHA2; ATF3; MAP3K8; CCL2; BCL3; IL4R; BCL6; RALGDS; NR4A1; FOXO1; PTGS2; PLAUR; EGR1; IL6; FOSL1; PFKFB3; ZFP36; IGFBP1; TNFRSF1A; THBD; EGR3; SOCS1; KLF4; FPR1; SERPINE1; SLC11A1; IL10; GJA1; …
Glypican 1 network	96	1296	33.1034	1.60674	2.38538e-07	0.000397881	1.86688e-05	8.55168e-05	TP53I3; WNT5A; PEG10; SKP2; PCBP4; CEBPA; PMS2; GPAM; PRKCZ; CD3G; FABP4; AFP; BRCA1; PIGR; GCK; RET; HNF4A; GNAO1; GADD45B; JUNB; FOSB; SOCS3; FOS; MYC; PPP1R15A; JUN; CEBPD; GADD45G; PIM1; FOSL2; CYR61; EPHA2; ATF3; MAP3K8; CCL2; BCL3; IL4R; BCL6; RALGDS; NR4A1; FOXO1; PTGS2; PLAUR; EGR1; IL6; FOSL1; PFKFB3; ZFP36; IGFBP1; TNFRSF1A; THBD; EGR3; SOCS1; KLF4; FPR1; SERPINE1; SLC11A1; IL10; GJA1; …
Validated targets of C-MYC transcriptional activation	5	81	1.72414	1.34134	0.317781	1	1	1	PEG10; GPAM; MYC; PIM1; FOSL1;
N-cadherin signaling events	16	251	5.51724	1.38337	0.116556	1	1	1	BRCA1; RET; FOS; MYC; JUN; CYR61; PLAUR; KLF4; GJA1; CMTM2; TMPRSS2; RAC1; MAK; VCAN; MEP1B; SPP1;
VEGFR3 signaling in lymphatic endothelium	2	25	0.689655	1.74309	0.321532	1	1	1	COL1A1; COL1A2;
Fc-epsilon receptor I signaling in mast cells	4	61	1.37931	1.42555	0.309519	1	1	1	FOS; JUN; FCER1G; NFATC2;
PDGF receptor signaling network	95	1290	32.7586	1.5974	3.80764e-07	0.000635114	1.92459e-05	8.81603e-05	TP53I3; WNT5A; PEG10; SKP2; PCBP4; CEBPA; PMS2; GPAM; PRKCZ; CD3G; FABP4; AFP; BRCA1; PIGR; GCK; RET; HNF4A; GNAO1; GADD45B; JUNB; FOSB; SOCS3; FOS; MYC; PPP1R15A; JUN; CEBPD; GADD45G; PIM1; FOSL2; CYR61; EPHA2; ATF3; MAP3K8; CCL2; BCL3; IL4R; BCL6; RALGDS; NR4A1; FOXO1; PTGS2; PLAUR; EGR1; IL6; FOSL1; PFKFB3; ZFP36; IGFBP1; TNFRSF1A; THBD; EGR3; SOCS1; KLF4; FPR1; SERPINE1; SLC11A1; IL10; GJA1; …
EphrinB-EPHB pathway	1	60	0.344828	0.365036	0.941911	1	1	1	RAC1;
Integrin family cell surface interactions	103	1375	35.5172	1.62484	3.47766e-08	5.80073e-05	1.41987e-05	6.50406e-05	TP53I3; WNT5A; PEG10; SKP2; PCBP4; CEBPA; PMS2; GPAM; PRKCZ; CD3G; FABP4; AFP; BRCA1; PIGR; GCK; RET; HNF4A; GNAO1; GADD45B; JUNB; FOSB; SOCS3; FOS; MYC; PPP1R15A; JUN; CEBPD; GADD45G; PIM1; FOSL2; CYR61; EPHA2; ATF3; MAP3K8; CCL2; BCL3; THBS1; IL4R; BCL6; RALGDS; NR4A1; FOXO1; PTGS2; PLAUR; EGR1; IL6; FOSL1; PFKFB3; ZFP36; CISH; SDC4; IGFBP1; TNFRSF1A; THBD; EGR3; SOCS1; KLF4; FPR1; SERPINE1; SL…
IL1-mediated signaling events	27	234	9.31034	2.50339	8.08346e-06	0.0134832	0.000293113	0.00134267	PRKCZ; GADD45B; JUNB; FOS; JUN; GADD45G; PIM1; MAP3K8; BCL3; NR4A1; PTGS2; EGR1; FOSL1; TNFRSF1A; IRAK3; EGR3; IL1B; IL1RN; NFKB2; DUSP10; MAP3K14; BATF3; RAC1; RCAN1; NFATC2; PRKCE; RPS6KA5;
Caspase cascade in apoptosis	4	52	1.37931	1.67223	0.217121	1	1	1	TNFRSF1A; CASP4; BIRC3; CASP7;
Calcineurin-regulated NFAT-dependent transcription in lymphocytes	9	49	3.10345	3.9873	0.000335019	0.558811	0.00846684	0.0387844	JUNB; FOS; JUN; PTGS2; EGR1; FOSL1; EGR3; BATF3; NFATC2;
Fanconi anemia pathway	3	48	1.03448	1.35979	0.382272	1	1	1	FANCL; BRCA1; UBE2T;
S1P2 pathway	4	26	1.37931	3.34382	0.0296883	1	0.405902	1	GNAO1; FOS; JUN; RAC1;
BARD1 signaling events	2	29	0.689655	1.50275	0.389258	1	1	1	FANCL; BRCA1;
Coregulation of Androgen receptor activity	4	61	1.37931	1.42555	0.309519	1	1	1	BRCA1; CMTM2; TMPRSS2; MAK;
Regulation of Telomerase	5	68	1.72414	1.59773	0.2034	1	1	1	FOS; MYC; JUN; IRF1; MXD1;
Cellular roles of Anthrax toxin	3	22	1.03448	2.96609	0.0781961	1	0.836096	1	DEFA1; IL1B; DEFA1B;
Internalization of ErbB1	95	1285	32.7586	1.60362	3.1509e-07	0.00052557	1.86688e-05	8.55168e-05	TP53I3; WNT5A; PEG10; SKP2; PCBP4; CEBPA; PMS2; GPAM; PRKCZ; CD3G; FABP4; AFP; BRCA1; PIGR; GCK; RET; HNF4A; GNAO1; GADD45B; JUNB; FOSB; SOCS3; FOS; MYC; PPP1R15A; JUN; CEBPD; GADD45G; PIM1; FOSL2; CYR61; EPHA2; ATF3; MAP3K8; CCL2; BCL3; IL4R; BCL6; RALGDS; NR4A1; FOXO1; PTGS2; PLAUR; EGR1; IL6; FOSL1; PFKFB3; ZFP36; IGFBP1; TNFRSF1A; THBD; EGR3; SOCS1; KLF4; FPR1; SERPINE1; SLC11A1; IL10; GJA1; …
TGF-beta receptor signaling	29	305	10	2.06287	0.000142955	0.238449	0.00411119	0.0188323	PRKCZ; HNF4A; GADD45B; JUNB; FOS; MYC; PPP1R15A; JUN; GADD45G; PIM1; ATF3; MAP3K8; NR4A1; FOXO1; PTGS2; EGR1; FOSL1; EGR3; SERPINE1; IL10; CDKN1A; DUSP10; BATF3; RAC1; RCAN1; COL1A2; NFATC2; PRKCE; RPS6KA5;
FOXA2 and FOXA3 transcription factor networks	6	43	2.06897	3.0307	0.0131916	1	0.215721	0.988161	CEBPA; AFP; GCK; HNF4A; CEBPD; IGFBP1;
Posttranslational regulation of adherens junction stability and dissassembly	15	231	5.17241	1.40925	0.112396	1	1	1	BRCA1; RET; FOS; MYC; JUN; CYR61; PLAUR; KLF4; CMTM2; TMPRSS2; RAC1; MAK; VCAN; MEP1B; SPP1;
BCR signaling pathway	4	67	1.37931	1.29791	0.373192	1	1	1	FOS; JUN; RAC1; BCL2A1;
Signaling events mediated by TCPTP	9	92	3.10345	2.12387	0.0252538	1	0.363132	1	PIGR; SOCS3; IL4R; BCL6; SOCS1; IL10; IRS2; COL1A1; COL1A2;
a4b7 Integrin signaling	1	9	0.344828	2.43128	0.34629	1	1	1	CD44;
Signaling events mediated by VEGFR1 and VEGFR2	95	1293	32.7586	1.5937	4.26218e-07	0.000710932	2.09098e-05	9.57821e-05	TP53I3; WNT5A; PEG10; SKP2; PCBP4; CEBPA; PMS2; GPAM; PRKCZ; CD3G; FABP4; AFP; BRCA1; PIGR; GCK; RET; HNF4A; GNAO1; GADD45B; JUNB; FOSB; SOCS3; FOS; MYC; PPP1R15A; JUN; CEBPD; GADD45G; PIM1; FOSL2; CYR61; EPHA2; ATF3; MAP3K8; CCL2; BCL3; IL4R; BCL6; RALGDS; NR4A1; FOXO1; PTGS2; PLAUR; EGR1; IL6; FOSL1; PFKFB3; ZFP36; IGFBP1; TNFRSF1A; THBD; EGR3; SOCS1; KLF4; FPR1; SERPINE1; SLC11A1; IL10; GJA1; …
Beta1 integrin cell surface interactions	101	1348	34.8276	1.62521	5.10745e-08	8.51923e-05	1.41987e-05	6.50406e-05	TP53I3; WNT5A; PEG10; SKP2; PCBP4; CEBPA; PMS2; GPAM; PRKCZ; CD3G; FABP4; AFP; BRCA1; PIGR; GCK; RET; HNF4A; GNAO1; GADD45B; JUNB; FOSB; SOCS3; FOS; MYC; PPP1R15A; JUN; CEBPD; GADD45G; PIM1; FOSL2; CYR61; EPHA2; ATF3; MAP3K8; CCL2; BCL3; THBS1; IL4R; BCL6; RALGDS; NR4A1; FOXO1; PTGS2; PLAUR; EGR1; IL6; FOSL1; PFKFB3; ZFP36; CISH; IGFBP1; TNFRSF1A; THBD; EGR3; SOCS1; KLF4; FPR1; SERPINE1; SLC11A1;…
Thromboxane A2 receptor signaling	5	54	1.72414	2.01188	0.101778	1	0.981306	1	PRKCZ; TGM2; RAC1; ICAM1; PRKCE;
Urokinase-type plasminogen activator (uPA) and uPAR-mediated signaling	95	1285	32.7586	1.60362	3.1509e-07	0.00052557	1.86688e-05	8.55168e-05	TP53I3; WNT5A; PEG10; SKP2; PCBP4; CEBPA; PMS2; GPAM; PRKCZ; CD3G; FABP4; AFP; BRCA1; PIGR; GCK; RET; HNF4A; GNAO1; GADD45B; JUNB; FOSB; SOCS3; FOS; MYC; PPP1R15A; JUN; CEBPD; GADD45G; PIM1; FOSL2; CYR61; EPHA2; ATF3; MAP3K8; CCL2; BCL3; IL4R; BCL6; RALGDS; NR4A1; FOXO1; PTGS2; PLAUR; EGR1; IL6; FOSL1; PFKFB3; ZFP36; IGFBP1; TNFRSF1A; THBD; EGR3; SOCS1; KLF4; FPR1; SERPINE1; SLC11A1; IL10; GJA1; …
Ras signaling in the CD4+ TCR pathway	9	42	3.10345	4.65169	9.66048e-05	0.161137	0.00304032	0.0139269	JUNB; FOS; JUN; MAP3K8; PTGS2; FOSL1; BATF3; RCAN1; NFATC2;
TCR signaling in na&#xef;ve CD8+ T cells	13	127	4.48276	2.22166	0.00547612	1	0.0971721	0.44512	CD3G; JUNB; FOS; JUN; MAP3K8; BCL3; EGR1; FOSL1; TNFRSF1A; NFKB2; MAP3K14; NFATC2; PRKCE;
Ceramide signaling pathway	5	49	1.72414	2.21713	0.0735881	1	0.829358	1	PRKCZ; SPHK2; MYC; TNFRSF1A; BIRC3;
Signaling mediated by p38-alpha and p38-beta	3	50	1.03448	1.30541	0.40752	1	1	1	JUN; PTGS2; RPS6KA5;
Signaling by Aurora kinases	5	98	1.72414	1.10868	0.474393	1	1	1	BRCA1; BCL3; TNFRSF1A; NFKB2; MAP3K14;
S1P3 pathway	2	29	0.689655	1.50275	0.389258	1	1	1	GNAO1; RAC1;
Validated nuclear estrogen receptor alpha network	4	64	1.37931	1.35874	0.341308	1	1	1	BRCA1; MYC; JUN; NCOA7;
Polo-like kinase signaling events in the cell cycle	6	109	2.06897	1.19577	0.38854	1	1	1	NINL; BRCA1; BCL3; TNFRSF1A; NFKB2; MAP3K14;
IFN-gamma pathway	97	1293	33.4483	1.62725	1.04345e-07	0.000174047	1.74047e-05	7.97262e-05	TP53I3; WNT5A; PEG10; SKP2; PCBP4; CEBPA; PMS2; GPAM; PRKCZ; CD3G; FABP4; AFP; BRCA1; PIGR; GCK; RET; HNF4A; GNAO1; GADD45B; JUNB; FOSB; SOCS3; FOS; MYC; PPP1R15A; JUN; CEBPD; GADD45G; PIM1; FOSL2; CYR61; EPHA2; ATF3; MAP3K8; CCL2; BCL3; IL4R; BCL6; RALGDS; NR4A1; FOXO1; PTGS2; PLAUR; EGR1; IL6; FOSL1; PFKFB3; ZFP36; IGFBP1; TNFRSF1A; THBD; EGR3; SOCS1; KLF4; IL1B; FPR1; SERPINE1; SLC11A1; IL10; …
Regulation of RAC1 activity	12	205	4.13793	1.27059	0.236069	1	1	1	PRKCZ; BRCA1; JUNB; SOCS3; FOS; JUN; CYR61; ATF3; IL6; DUSP10; RAC1; CIT;
PAR1-mediated thrombin signaling events	95	1296	32.7586	1.59001	4.76806e-07	0.000795312	2.17236e-05	9.95101e-05	TP53I3; WNT5A; PEG10; SKP2; PCBP4; CEBPA; PMS2; GPAM; PRKCZ; CD3G; FABP4; AFP; BRCA1; PIGR; GCK; RET; HNF4A; GNAO1; GADD45B; JUNB; FOSB; SOCS3; FOS; MYC; PPP1R15A; JUN; CEBPD; GADD45G; PIM1; FOSL2; CYR61; EPHA2; ATF3; MAP3K8; CCL2; BCL3; IL4R; BCL6; RALGDS; NR4A1; FOXO1; PTGS2; PLAUR; EGR1; IL6; FOSL1; PFKFB3; ZFP36; IGFBP1; TNFRSF1A; THBD; EGR3; SOCS1; KLF4; FPR1; SERPINE1; SLC11A1; IL10; GJA1; …
IL12 signaling mediated by STAT4	6	29	2.06897	4.4933	0.00176324	1	0.0363097	0.166325	CD3G; FOS; JUN; IL18RAP; IRF1; HLA-DRA;
Beta3 integrin cell surface interactions	8	43	2.75862	4.03926	0.000655499	1	0.0153996	0.0705415	CYR61; THBS1; PLAUR; SDC4; PVR; COL1A1; COL1A2; SPP1;
Noncanonical Wnt signaling pathway	13	182	4.48276	1.55032	0.076565	1	0.836096	1	WNT5A; PRKCZ; BRCA1; MYC; JUN; CYR61; KLF4; CMTM2; TMPRSS2; RAC1; MAK; VCAN; NFATC2;
Regulation of p38-alpha and p38-beta	18	164	6.2069	2.38167	0.000506282	0.844479	0.0122388	0.0560628	PRKCZ; JUNB; FOS; JUN; PIM1; MAP3K8; NR4A1; PTGS2; EGR1; FOSL1; EGR3; DUSP10; BATF3; RAC1; RCAN1; NFATC2; PRKCE; RPS6KA5;
Alpha4 beta1 integrin signaling events	3	33	1.03448	1.9777	0.193256	1	1	1	THBS1; RAC1; SPP1;
S1P4 pathway	1	14	0.344828	1.56359	0.483935	1	1	1	GNAO1;
PDGFR-beta signaling pathway	95	1285	32.7586	1.60362	3.1509e-07	0.00052557	1.86688e-05	8.55168e-05	TP53I3; WNT5A; PEG10; SKP2; PCBP4; CEBPA; PMS2; GPAM; PRKCZ; CD3G; FABP4; AFP; BRCA1; PIGR; GCK; RET; HNF4A; GNAO1; GADD45B; JUNB; FOSB; SOCS3; FOS; MYC; PPP1R15A; JUN; CEBPD; GADD45G; PIM1; FOSL2; CYR61; EPHA2; ATF3; MAP3K8; CCL2; BCL3; IL4R; BCL6; RALGDS; NR4A1; FOXO1; PTGS2; PLAUR; EGR1; IL6; FOSL1; PFKFB3; ZFP36; IGFBP1; TNFRSF1A; THBD; EGR3; SOCS1; KLF4; FPR1; SERPINE1; SLC11A1; IL10; GJA1; …
p63 transcription factor network	6	105	2.06897	1.24132	0.355155	1	1	1	TP53I3; SPATA18; CEBPD; FOSL2; CDKN1A; NRG1;
Canonical Wnt signaling pathway	9	155	3.10345	1.26068	0.285897	1	1	1	BRCA1; MYC; JUN; CYR61; KLF4; CMTM2; TMPRSS2; MAK; VCAN;
HIF-2-alpha transcription factor network	2	34	0.689655	1.28182	0.469379	1	1	1	SERPINE1; BHLHE40;
E-cadherin signaling in the nascent adherens junction	17	275	5.86207	1.34151	0.132058	1	1	1	BRCA1; RET; FOS; MYC; JUN; CYR61; EPHA2; PLAUR; KLF4; CMTM2; TMPRSS2; RAC1; MAK; VCAN; PLEKHA7; MEP1B; SPP1;
EPHB forward signaling	1	40	0.344828	0.547509	0.849544	1	1	1	RAC1;
Integrin-linked kinase signaling	58	654	20	1.92379	4.63191e-07	0.000772602	2.17236e-05	9.95101e-05	PRKCZ; CD3G; FABP4; AFP; BRCA1; GCK; HNF4A; GADD45B; JUNB; FOSB; SOCS3; FOS; MYC; PPP1R15A; JUN; CEBPD; GADD45G; PIM1; FOSL2; CYR61; ATF3; MAP3K8; CCL2; NR4A1; FOXO1; PTGS2; PLAUR; EGR1; IL6; FOSL1; PFKFB3; IGFBP1; THBD; EGR3; KLF4; SERPINE1; IL10; GJA1; CMTM2; LIF; CDKN1A; DUSP10; BATF3; TMPRSS2; RAC1; MAK; VCAN; IRF1; RCAN1; BHLHE40; COL1A2; FKBP5; ICAM1; MCL1; NFATC2; PRKCE; RPS6KA5; SGK1;
Regulation of nuclear beta catenin signaling and target gene transcription	9	135	3.10345	1.44743	0.169847	1	1	1	BRCA1; MYC; JUN; CYR61; KLF4; CMTM2; TMPRSS2; MAK; VCAN;
Ephrin B reverse signaling	1	30	0.344828	0.729951	0.758141	1	1	1	RAC1;
p38 MAPK signaling pathway	20	189	6.89655	2.29615	0.000404589	0.674854	0.00992432	0.0454607	PRKCZ; GADD45B; JUNB; FOS; JUN; GADD45G; PIM1; MAP3K8; NR4A1; PTGS2; EGR1; FOSL1; EGR3; DUSP10; BATF3; RAC1; RCAN1; NFATC2; PRKCE; RPS6KA5;
EGF receptor (ErbB1) signaling pathway	95	1285	32.7586	1.60362	3.1509e-07	0.00052557	1.86688e-05	8.55168e-05	TP53I3; WNT5A; PEG10; SKP2; PCBP4; CEBPA; PMS2; GPAM; PRKCZ; CD3G; FABP4; AFP; BRCA1; PIGR; GCK; RET; HNF4A; GNAO1; GADD45B; JUNB; FOSB; SOCS3; FOS; MYC; PPP1R15A; JUN; CEBPD; GADD45G; PIM1; FOSL2; CYR61; EPHA2; ATF3; MAP3K8; CCL2; BCL3; IL4R; BCL6; RALGDS; NR4A1; FOXO1; PTGS2; PLAUR; EGR1; IL6; FOSL1; PFKFB3; ZFP36; IGFBP1; TNFRSF1A; THBD; EGR3; SOCS1; KLF4; FPR1; SERPINE1; SLC11A1; IL10; GJA1; …
p75(NTR)-mediated signaling	10	178	3.44828	1.21963	0.305319	1	1	1	PRKCZ; FOS; BCL3; EGR1; TNFRSF1A; NFKB2; MAP3K14; BIRC3; RAC1; RPS6KA5;
Thrombin/protease-activated receptor (PAR) pathway	95	1297	32.7586	1.58878	4.94902e-07	0.000825497	2.17236e-05	9.95101e-05	TP53I3; WNT5A; PEG10; SKP2; PCBP4; CEBPA; PMS2; GPAM; PRKCZ; CD3G; FABP4; AFP; BRCA1; PIGR; GCK; RET; HNF4A; GNAO1; GADD45B; JUNB; FOSB; SOCS3; FOS; MYC; PPP1R15A; JUN; CEBPD; GADD45G; PIM1; FOSL2; CYR61; EPHA2; ATF3; MAP3K8; CCL2; BCL3; IL4R; BCL6; RALGDS; NR4A1; FOXO1; PTGS2; PLAUR; EGR1; IL6; FOSL1; PFKFB3; ZFP36; IGFBP1; TNFRSF1A; THBD; EGR3; SOCS1; KLF4; FPR1; SERPINE1; SLC11A1; IL10; GJA1; …
Class I PI3K signaling events	95	1285	32.7586	1.60362	3.1509e-07	0.00052557	1.86688e-05	8.55168e-05	TP53I3; WNT5A; PEG10; SKP2; PCBP4; CEBPA; PMS2; GPAM; PRKCZ; CD3G; FABP4; AFP; BRCA1; PIGR; GCK; RET; HNF4A; GNAO1; GADD45B; JUNB; FOSB; SOCS3; FOS; MYC; PPP1R15A; JUN; CEBPD; GADD45G; PIM1; FOSL2; CYR61; EPHA2; ATF3; MAP3K8; CCL2; BCL3; IL4R; BCL6; RALGDS; NR4A1; FOXO1; PTGS2; PLAUR; EGR1; IL6; FOSL1; PFKFB3; ZFP36; IGFBP1; TNFRSF1A; THBD; EGR3; SOCS1; KLF4; FPR1; SERPINE1; SLC11A1; IL10; GJA1; …
Arf6 signaling events	95	1285	32.7586	1.60362	3.1509e-07	0.00052557	1.86688e-05	8.55168e-05	TP53I3; WNT5A; PEG10; SKP2; PCBP4; CEBPA; PMS2; GPAM; PRKCZ; CD3G; FABP4; AFP; BRCA1; PIGR; GCK; RET; HNF4A; GNAO1; GADD45B; JUNB; FOSB; SOCS3; FOS; MYC; PPP1R15A; JUN; CEBPD; GADD45G; PIM1; FOSL2; CYR61; EPHA2; ATF3; MAP3K8; CCL2; BCL3; IL4R; BCL6; RALGDS; NR4A1; FOXO1; PTGS2; PLAUR; EGR1; IL6; FOSL1; PFKFB3; ZFP36; IGFBP1; TNFRSF1A; THBD; EGR3; SOCS1; KLF4; FPR1; SERPINE1; SLC11A1; IL10; GJA1; …
EPO signaling pathway	2	34	0.689655	1.28182	0.469379	1	1	1	SOCS3; IRS2;
Plasma membrane estrogen receptor signaling	96	1298	33.1034	1.60427	2.5749e-07	0.000429493	1.86688e-05	8.55168e-05	TP53I3; WNT5A; PEG10; SKP2; PCBP4; CEBPA; PMS2; GPAM; PRKCZ; CD3G; FABP4; AFP; BRCA1; PIGR; GCK; RET; HNF4A; GNAO1; GADD45B; JUNB; FOSB; SOCS3; FOS; MYC; PPP1R15A; JUN; CEBPD; GADD45G; PIM1; FOSL2; CYR61; EPHA2; ATF3; MAP3K8; CCL2; HBEGF; BCL3; IL4R; BCL6; RALGDS; NR4A1; FOXO1; PTGS2; PLAUR; EGR1; IL6; FOSL1; PFKFB3; ZFP36; IGFBP1; TNFRSF1A; THBD; EGR3; SOCS1; KLF4; FPR1; SERPINE1; SLC11A1; IL10;…
FoxO family signaling	4	49	1.37931	1.77459	0.188178	1	1	1	SKP2; BCL6; FOXO1; SGK1;
IL2-mediated signaling events	15	115	5.17241	2.83063	0.000232203	0.387315	0.00605179	0.0277217	PRKCZ; SOCS3; FOS; MYC; JUN; SOCS2; BCL3; CISH; TNFRSF1A; SOCS1; NFKB2; MAP3K14; RAC1; IRS2; PRKCE;
FAS (CD95) signaling pathway	11	130	3.7931	1.83675	0.0368968	1	0.488443	1	PRKCZ; SPHK2; MYC; BCL3; TNFRSF1A; CASP4; NFKB2; MAP3K14; BIRC3; CASP7; RFC1;
C-MYB transcription factor network	10	84	3.44828	2.58429	0.00497885	1	0.0912606	0.418041	CEBPA; MYC; CEBPD; PIM1; PTGS2; ETS2; CDKN1A; BIRC3; COL1A2; LECT2;
p73 transcription factor network	9	78	3.10345	2.50503	0.00925348	1	0.159122	0.728895	TP53I3; RNF43; AFP; MYC; IL4R; SERPINE1; GRAMD4; CDKN1A; SERPINA1;
Signaling events mediated by HDAC Class III	2	39	0.689655	1.11753	0.542921	1	1	1	FOXO1; CDKN1A;
FOXM1 transcription factor network	4	42	1.37931	2.07028	0.126478	1	1	1	SKP2; ONECUT1; FOS; MYC;
IL3-mediated signaling events	98	1292	33.7931	1.64529	4.84017e-08	8.07341e-05	1.41987e-05	6.50406e-05	TP53I3; WNT5A; PEG10; SKP2; PCBP4; CEBPA; PMS2; GPAM; PRKCZ; CD3G; FABP4; AFP; BRCA1; PIGR; GCK; RET; HNF4A; GNAO1; GADD45B; JUNB; FOSB; SOCS3; FOS; MYC; PPP1R15A; JUN; CEBPD; GADD45G; PIM1; FOSL2; CYR61; EPHA2; ATF3; MAP3K8; CCL2; BCL3; IL4R; BCL6; RALGDS; NR4A1; FOXO1; PTGS2; PLAUR; EGR1; IL6; FOSL1; PFKFB3; ZFP36; CISH; IGFBP1; TNFRSF1A; THBD; EGR3; SOCS1; KLF4; FPR1; SERPINE1; SLC11A1; IL10; …
AP-1 transcription factor network	58	621	20	2.02601	7.60639e-08	0.000126875	1.74047e-05	7.97262e-05	PRKCZ; CD3G; FABP4; AFP; BRCA1; GCK; HNF4A; GADD45B; JUNB; FOSB; SOCS3; FOS; MYC; PPP1R15A; JUN; CEBPD; GADD45G; PIM1; FOSL2; CYR61; ATF3; MAP3K8; CCL2; NR4A1; FOXO1; PTGS2; PLAUR; EGR1; IL6; FOSL1; PFKFB3; IGFBP1; THBD; EGR3; KLF4; SERPINE1; IL10; GJA1; CMTM2; LIF; CDKN1A; DUSP10; BATF3; TMPRSS2; RAC1; MAK; VCAN; IRF1; RCAN1; BHLHE40; COL1A2; FKBP5; ICAM1; MCL1; NFATC2; PRKCE; RPS6KA5; SGK1;
Signaling events regulated by Ret tyrosine kinase	8	69	2.75862	2.51744	0.0134383	1	0.217623	0.996873	RET; JUN; BCL3; TNFRSF1A; NFKB2; MAP3K14; RAC1; IRS2;
Hypoxic and oxygen homeostasis regulation of HIF-1-alpha	9	80	3.10345	2.44241	0.0108638	1	0.183038	0.838449	GCK; HNF4A; FOS; JUN; PFKFB3; IGFBP1; SERPINE1; BHLHE40; MCL1;
amb2 Integrin signaling	4	40	1.37931	2.17377	0.110699	1	1	1	PRKCZ; PLAUR; IL6; ICAM1;
Glucocorticoid receptor signaling	11	85	3.7931	2.80903	0.00167625	1	0.0353922	0.162122	AFP; FOS; JUN; NR4A1; EGR1; IL6; CDKN1A; IRF1; FKBP5; ICAM1; SGK1;
Hedgehog signaling events mediated by Gli proteins	1	48	0.344828	0.456276	0.89714	1	1	1	GNAO1;
mTOR signaling pathway	95	1285	32.7586	1.60362	3.1509e-07	0.00052557	1.86688e-05	8.55168e-05	TP53I3; WNT5A; PEG10; SKP2; PCBP4; CEBPA; PMS2; GPAM; PRKCZ; CD3G; FABP4; AFP; BRCA1; PIGR; GCK; RET; HNF4A; GNAO1; GADD45B; JUNB; FOSB; SOCS3; FOS; MYC; PPP1R15A; JUN; CEBPD; GADD45G; PIM1; FOSL2; CYR61; EPHA2; ATF3; MAP3K8; CCL2; BCL3; IL4R; BCL6; RALGDS; NR4A1; FOXO1; PTGS2; PLAUR; EGR1; IL6; FOSL1; PFKFB3; ZFP36; IGFBP1; TNFRSF1A; THBD; EGR3; SOCS1; KLF4; FPR1; SERPINE1; SLC11A1; IL10; GJA1; …
RAC1 signaling pathway	12	205	4.13793	1.27059	0.236069	1	1	1	PRKCZ; BRCA1; JUNB; SOCS3; FOS; JUN; CYR61; ATF3; IL6; DUSP10; RAC1; CIT;
ErbB receptor signaling network	97	1308	33.4483	1.60858	1.87296e-07	0.000312409	1.86688e-05	8.55168e-05	TP53I3; WNT5A; PEG10; SKP2; PCBP4; CEBPA; PMS2; GPAM; PRKCZ; CD3G; FABP4; AFP; BRCA1; PIGR; GCK; RET; HNF4A; GNAO1; GADD45B; JUNB; FOSB; SOCS3; FOS; MYC; PPP1R15A; JUN; CEBPD; GADD45G; PIM1; FOSL2; CYR61; EPHA2; ATF3; MAP3K8; CCL2; HBEGF; BCL3; IL4R; BCL6; RALGDS; NR4A1; FOXO1; PTGS2; PLAUR; EGR1; IL6; FOSL1; PFKFB3; ZFP36; IGFBP1; TNFRSF1A; THBD; EGR3; SOCS1; KLF4; FPR1; SERPINE1; SLC11A1; IL10;…
Signaling events mediated by focal adhesion kinase	95	1285	32.7586	1.60362	3.1509e-07	0.00052557	1.86688e-05	8.55168e-05	TP53I3; WNT5A; PEG10; SKP2; PCBP4; CEBPA; PMS2; GPAM; PRKCZ; CD3G; FABP4; AFP; BRCA1; PIGR; GCK; RET; HNF4A; GNAO1; GADD45B; JUNB; FOSB; SOCS3; FOS; MYC; PPP1R15A; JUN; CEBPD; GADD45G; PIM1; FOSL2; CYR61; EPHA2; ATF3; MAP3K8; CCL2; BCL3; IL4R; BCL6; RALGDS; NR4A1; FOXO1; PTGS2; PLAUR; EGR1; IL6; FOSL1; PFKFB3; ZFP36; IGFBP1; TNFRSF1A; THBD; EGR3; SOCS1; KLF4; FPR1; SERPINE1; SLC11A1; IL10; GJA1; …
VEGF and VEGFR signaling network	95	1301	32.7586	1.5839	5.74033e-07	0.000957486	2.45509e-05	0.000112461	TP53I3; WNT5A; PEG10; SKP2; PCBP4; CEBPA; PMS2; GPAM; PRKCZ; CD3G; FABP4; AFP; BRCA1; PIGR; GCK; RET; HNF4A; GNAO1; GADD45B; JUNB; FOSB; SOCS3; FOS; MYC; PPP1R15A; JUN; CEBPD; GADD45G; PIM1; FOSL2; CYR61; EPHA2; ATF3; MAP3K8; CCL2; BCL3; IL4R; BCL6; RALGDS; NR4A1; FOXO1; PTGS2; PLAUR; EGR1; IL6; FOSL1; PFKFB3; ZFP36; IGFBP1; TNFRSF1A; THBD; EGR3; SOCS1; KLF4; FPR1; SERPINE1; SLC11A1; IL10; GJA1; …
Insulin-mediated glucose transport	1	29	0.344828	0.755113	0.746395	1	1	1	PRKCZ;
Glucocorticoid receptor regulatory network	11	80	3.7931	2.98457	0.00100999	1	0.0224622	0.102893	AFP; FOS; JUN; NR4A1; EGR1; IL6; CDKN1A; IRF1; FKBP5; ICAM1; SGK1;
Alpha9 beta1 integrin signaling events	99	1302	34.1379	1.64931	3.47341e-08	5.79364e-05	1.41987e-05	6.50406e-05	TP53I3; WNT5A; PEG10; SKP2; PCBP4; CEBPA; PMS2; GPAM; PRKCZ; CD3G; FABP4; AFP; BRCA1; PIGR; GCK; RET; HNF4A; GNAO1; GADD45B; JUNB; FOSB; SOCS3; FOS; MYC; PPP1R15A; JUN; CEBPD; GADD45G; PIM1; FOSL2; CYR61; EPHA2; ATF3; MAP3K8; CCL2; BCL3; IL4R; BCL6; RALGDS; NR4A1; FOXO1; PTGS2; PLAUR; EGR1; IL6; FOSL1; PFKFB3; ZFP36; CISH; IGFBP1; TNFRSF1A; THBD; EGR3; SOCS1; KLF4; FPR1; SERPINE1; SLC11A1; IL10; …
IL8- and CXCR1-mediated signaling events	1	28	0.344828	0.782072	0.73408	1	1	1	PRKCE;
Syndecan-2-mediated signaling events	4	77	1.37931	1.12937	0.477591	1	1	1	FOS; JUN; PLAUR; SPP1;
Signaling events mediated by Stem cell factor receptor (c-Kit)	1	52	0.344828	0.421185	0.914968	1	1	1	SOCS1;
ALK1 pathway	30	324	10.3448	2.00884	0.00017617	0.293852	0.00481725	0.0220665	PRKCZ; HNF4A; GADD45B; JUNB; FOS; MYC; PPP1R15A; JUN; GADD45G; PIM1; ATF3; MAP3K8; NR4A1; FOXO1; PTGS2; EGR1; FOSL1; EGR3; SERPINE1; IL10; TGFB3; CDKN1A; DUSP10; BATF3; RAC1; RCAN1; COL1A2; NFATC2; PRKCE; RPS6KA5;
ErbB4 signaling events	2	32	0.689655	1.36191	0.438049	1	1	1	HBEGF; NRG1;
Arf6 downstream pathway	95	1285	32.7586	1.60362	3.1509e-07	0.00052557	1.86688e-05	8.55168e-05	TP53I3; WNT5A; PEG10; SKP2; PCBP4; CEBPA; PMS2; GPAM; PRKCZ; CD3G; FABP4; AFP; BRCA1; PIGR; GCK; RET; HNF4A; GNAO1; GADD45B; JUNB; FOSB; SOCS3; FOS; MYC; PPP1R15A; JUN; CEBPD; GADD45G; PIM1; FOSL2; CYR61; EPHA2; ATF3; MAP3K8; CCL2; BCL3; IL4R; BCL6; RALGDS; NR4A1; FOXO1; PTGS2; PLAUR; EGR1; IL6; FOSL1; PFKFB3; ZFP36; IGFBP1; TNFRSF1A; THBD; EGR3; SOCS1; KLF4; FPR1; SERPINE1; SLC11A1; IL10; GJA1; …
JNK signaling in the CD4+ TCR pathway	9	42	3.10345	4.65169	9.66048e-05	0.161137	0.00304032	0.0139269	JUNB; FOS; JUN; MAP3K8; PTGS2; FOSL1; BATF3; RCAN1; NFATC2;
Role of Calcineurin-dependent NFAT signaling in lymphocytes	15	95	5.17241	3.42649	2.46237e-05	0.0410723	0.000821446	0.00376283	PRKCZ; JUNB; FOS; JUN; PIM1; MAP3K8; NR4A1; PTGS2; EGR1; FOSL1; EGR3; BATF3; RCAN1; NFATC2; PRKCE;
IL4-mediated signaling events	9	62	3.10345	3.15138	0.00195619	1	0.0397918	0.182276	PIGR; SOCS3; IL4R; BCL6; SOCS1; IL10; IRS2; COL1A1; COL1A2;
HIV-1 Nef: Negative effector of Fas and TNF-alpha	4	35	1.37931	2.48422	0.0755508	1	0.834561	1	TNFRSF1A; MAP3K14; BIRC3; CASP7;
Signaling events mediated by PTP1B	2	52	0.689655	0.8382	0.699423	1	1	1	SOCS3; LEPR;
Validated transcriptional targets of AP1 family members Fra1 and Fra2	20	134	6.89655	3.23853	2.67351e-06	0.00445941	0.00010135	0.000464259	CD3G; JUNB; FOS; JUN; FOSL2; CCL2; PTGS2; PLAUR; EGR1; IL6; FOSL1; THBD; EGR3; GJA1; LIF; BATF3; RCAN1; COL1A2; NFATC2; PRKCE;
CXCR4-mediated signaling events	21	190	7.24138	2.39821	0.000157853	0.263298	0.00438831	0.0201017	PRKCZ; CD3G; GNAO1; JUNB; FOS; JUN; MAP3K8; BCL3; RGS1; FOXO1; PTGS2; FOSL1; TNFRSF1A; NFKB2; MAP3K14; BATF3; RAC1; RCAN1; HLA-DRA; NFATC2; PRKCE;
S1P1 pathway	95	1285	32.7586	1.60362	3.1509e-07	0.00052557	1.86688e-05	8.55168e-05	TP53I3; WNT5A; PEG10; SKP2; PCBP4; CEBPA; PMS2; GPAM; PRKCZ; CD3G; FABP4; AFP; BRCA1; PIGR; GCK; RET; HNF4A; GNAO1; GADD45B; JUNB; FOSB; SOCS3; FOS; MYC; PPP1R15A; JUN; CEBPD; GADD45G; PIM1; FOSL2; CYR61; EPHA2; ATF3; MAP3K8; CCL2; BCL3; IL4R; BCL6; RALGDS; NR4A1; FOXO1; PTGS2; PLAUR; EGR1; IL6; FOSL1; PFKFB3; ZFP36; IGFBP1; TNFRSF1A; THBD; EGR3; SOCS1; KLF4; FPR1; SERPINE1; SLC11A1; IL10; GJA1; …
FOXA1 transcription factor network	4	44	1.37931	1.9762	0.143142	1	1	1	BRCA1; FOS; JUN; SERPINA1;
Netrin-mediated signaling events	1	32	0.344828	0.684343	0.780033	1	1	1	RAC1;
EPHA2 forward signaling	2	19	0.689655	2.29325	0.217492	1	1	1	EPHA2; RAC1;
ATM pathway	25	307	8.62069	1.76685	0.00373873	1	0.070866	0.324619	TP53I3; TYMS; SKP2; PCBP4; CEBPA; PMS2; FANCL; AFP; BRCA1; UBE2T; MYC; JUN; EPHA2; ATF3; BCL6; SERPINE1; TNFRSF10D; LIF; CDKN1A; VCAN; BCL2A1; CASP7; MCL1; RGCC; SPP1;
TNF receptor signaling pathway	29	299	10	2.10426	0.000100498	0.167631	0.00310427	0.0142198	PRKCZ; SPHK2; GADD45B; JUNB; FOS; MYC; JUN; GADD45G; PIM1; MAP3K8; BCL3; NR4A1; PTGS2; EGR1; FOSL1; TNFRSF1A; EGR3; CASP4; NFKB2; DUSP10; MAP3K14; BATF3; BIRC3; RAC1; RCAN1; CASP7; NFATC2; PRKCE; RPS6KA5;
p53 pathway	18	189	6.2069	2.06665	0.00261442	1	0.0519149	0.237809	TP53I3; SKP2; PCBP4; PMS2; AFP; JUN; EPHA2; ATF3; BCL6; SERPINE1; TNFRSF10D; LIF; CDKN1A; VCAN; BCL2A1; MCL1; RGCC; SPP1;
ErbB1 downstream signaling	95	1285	32.7586	1.60362	3.1509e-07	0.00052557	1.86688e-05	8.55168e-05	TP53I3; WNT5A; PEG10; SKP2; PCBP4; CEBPA; PMS2; GPAM; PRKCZ; CD3G; FABP4; AFP; BRCA1; PIGR; GCK; RET; HNF4A; GNAO1; GADD45B; JUNB; FOSB; SOCS3; FOS; MYC; PPP1R15A; JUN; CEBPD; GADD45G; PIM1; FOSL2; CYR61; EPHA2; ATF3; MAP3K8; CCL2; BCL3; IL4R; BCL6; RALGDS; NR4A1; FOXO1; PTGS2; PLAUR; EGR1; IL6; FOSL1; PFKFB3; ZFP36; IGFBP1; TNFRSF1A; THBD; EGR3; SOCS1; KLF4; FPR1; SERPINE1; SLC11A1; IL10; GJA1; …
EGFR-dependent Endothelin signaling events	95	1286	32.7586	1.60237	3.27294e-07	0.000545927	1.86688e-05	8.55168e-05	TP53I3; WNT5A; PEG10; SKP2; PCBP4; CEBPA; PMS2; GPAM; PRKCZ; CD3G; FABP4; AFP; BRCA1; PIGR; GCK; RET; HNF4A; GNAO1; GADD45B; JUNB; FOSB; SOCS3; FOS; MYC; PPP1R15A; JUN; CEBPD; GADD45G; PIM1; FOSL2; CYR61; EPHA2; ATF3; MAP3K8; CCL2; BCL3; IL4R; BCL6; RALGDS; NR4A1; FOXO1; PTGS2; PLAUR; EGR1; IL6; FOSL1; PFKFB3; ZFP36; IGFBP1; TNFRSF1A; THBD; EGR3; SOCS1; KLF4; FPR1; SERPINE1; SLC11A1; IL10; GJA1; …
Syndecan-4-mediated signaling events	15	209	5.17241	1.55759	0.0581251	1	0.702555	1	WNT5A; PRKCZ; BRCA1; MYC; JUN; CYR61; THBS1; SDC4; KLF4; CMTM2; TMPRSS2; RAC1; MAK; VCAN; NFATC2;
Nongenotropic Androgen signaling	4	26	1.37931	3.34382	0.0296883	1	0.405902	1	GNAO1; FOS; RAC1; SHBG;
Alpha6 beta4 integrin-ligand interactions	1	11	0.344828	1.98963	0.405266	1	1	1	LAMC2;
IL8-mediated signaling events	2	38	0.689655	1.14693	0.528787	1	1	1	CXCR2; PRKCE;
ATR signaling pathway	21	250	7.24138	1.82267	0.00539102	1	0.0966905	0.442914	TP53I3; SKP2; PCBP4; PMS2; FANCL; AFP; BRCA1; UBE2T; JUN; EPHA2; ATF3; BCL6; SERPINE1; TNFRSF10D; LIF; CDKN1A; VCAN; BCL2A1; MCL1; RGCC; SPP1;
RXR and RAR heterodimerization with other nuclear receptor	1	26	0.344828	0.842208	0.707633	1	1	1	NR4A1;
Regulation of nuclear SMAD2/3 signaling	29	305	10	2.06287	0.000142955	0.238449	0.00411119	0.0188323	PRKCZ; HNF4A; GADD45B; JUNB; FOS; MYC; PPP1R15A; JUN; GADD45G; PIM1; ATF3; MAP3K8; NR4A1; FOXO1; PTGS2; EGR1; FOSL1; EGR3; SERPINE1; IL10; CDKN1A; DUSP10; BATF3; RAC1; RCAN1; COL1A2; NFATC2; PRKCE; RPS6KA5;
ALK1 signaling events	30	321	10.3448	2.02762	0.000149182	0.248835	0.00421755	0.0193195	PRKCZ; HNF4A; GADD45B; JUNB; FOS; MYC; PPP1R15A; JUN; GADD45G; PIM1; ATF3; MAP3K8; NR4A1; FOXO1; PTGS2; EGR1; FOSL1; EGR3; SERPINE1; IL10; TGFB3; CDKN1A; DUSP10; BATF3; RAC1; RCAN1; COL1A2; NFATC2; PRKCE; RPS6KA5;
PDGFR-alpha signaling pathway	2	21	0.689655	2.07495	0.252147	1	1	1	FOS; JUN;
Angiopoietin receptor Tie2-mediated signaling	3	50	1.03448	1.30541	0.40752	1	1	1	FOXO1; CDKN1A; RAC1;
Arf6 trafficking events	95	1285	32.7586	1.60362	3.1509e-07	0.00052557	1.86688e-05	8.55168e-05	TP53I3; WNT5A; PEG10; SKP2; PCBP4; CEBPA; PMS2; GPAM; PRKCZ; CD3G; FABP4; AFP; BRCA1; PIGR; GCK; RET; HNF4A; GNAO1; GADD45B; JUNB; FOSB; SOCS3; FOS; MYC; PPP1R15A; JUN; CEBPD; GADD45G; PIM1; FOSL2; CYR61; EPHA2; ATF3; MAP3K8; CCL2; BCL3; IL4R; BCL6; RALGDS; NR4A1; FOXO1; PTGS2; PLAUR; EGR1; IL6; FOSL1; PFKFB3; ZFP36; IGFBP1; TNFRSF1A; THBD; EGR3; SOCS1; KLF4; FPR1; SERPINE1; SLC11A1; IL10; GJA1; …
Alternative NF-kappaB pathway	2	6	0.689655	7.25371	0.0280931	1	0.390494	1	NFKB2; MAP3K14;
E-cadherin signaling events	17	280	5.86207	1.31756	0.147839	1	1	1	BRCA1; RET; FOS; MYC; JUN; CYR61; EPHA2; PLAUR; KLF4; CMTM2; TMPRSS2; RAC1; MAK; VCAN; PLEKHA7; MEP1B; SPP1;
Androgen-mediated signaling	12	130	4.13793	2.00357	0.0163321	1	0.256999	1	CEBPA; BRCA1; GNAO1; FOS; JUN; FOXO1; EGR1; CMTM2; TMPRSS2; RAC1; MAK; SHBG;
Endothelins	95	1304	32.7586	1.58025	6.41124e-07	0.0010694	2.67349e-05	0.000122466	TP53I3; WNT5A; PEG10; SKP2; PCBP4; CEBPA; PMS2; GPAM; PRKCZ; CD3G; FABP4; AFP; BRCA1; PIGR; GCK; RET; HNF4A; GNAO1; GADD45B; JUNB; FOSB; SOCS3; FOS; MYC; PPP1R15A; JUN; CEBPD; GADD45G; PIM1; FOSL2; CYR61; EPHA2; ATF3; MAP3K8; CCL2; BCL3; IL4R; BCL6; RALGDS; NR4A1; FOXO1; PTGS2; PLAUR; EGR1; IL6; FOSL1; PFKFB3; ZFP36; IGFBP1; TNFRSF1A; THBD; EGR3; SOCS1; KLF4; FPR1; SERPINE1; SLC11A1; IL10; GJA1; …
Beta5 beta6 beta7 and beta8 integrin cell surface interactions	2	17	0.689655	2.56289	0.183327	1	1	1	CYR61; PLAUR;
Presenilin action in Notch and Wnt signaling	4	46	1.37931	1.8903	0.160616	1	1	1	FRAT1; FOS; MYC; JUN;
a6b1 and a6b4 Integrin signaling	3	35	1.03448	1.86472	0.21741	1	1	1	RAC1; PMP22; CASP7;
Regulation of retinoblastoma protein	5	66	1.72414	1.64614	0.187161	1	1	1	SKP2; CEBPA; JUN; CEBPD; CDKN1A;
TCR signaling in na&#xef;ve CD4+ T cells	16	133	5.51724	2.61063	0.000371177	0.619123	0.00924064	0.0423289	CD3G; JUNB; FOS; JUN; MAP3K8; BCL3; PTGS2; FOSL1; TNFRSF1A; NFKB2; MAP3K14; BATF3; RCAN1; HLA-DRA; NFATC2; PRKCE;
Notch signaling pathway	4	94	1.37931	0.925143	0.636278	1	1	1	SKP2; MYC; CDKN1A; RCAN1;
E2F transcription factor network	8	73	2.75862	2.37952	0.0184549	1	0.285025	1	TYMS; CEBPA; BRCA1; MYC; SERPINE1; CDKN1A; CASP7; MCL1;
IL5-mediated signaling events	97	1289	33.4483	1.63229	8.90389e-08	0.000148517	1.74047e-05	7.97262e-05	TP53I3; WNT5A; PEG10; SKP2; PCBP4; CEBPA; PMS2; GPAM; PRKCZ; CD3G; FABP4; AFP; BRCA1; PIGR; GCK; RET; HNF4A; GNAO1; GADD45B; JUNB; FOSB; SOCS3; FOS; MYC; PPP1R15A; JUN; CEBPD; GADD45G; PIM1; FOSL2; CYR61; EPHA2; ATF3; MAP3K8; CCL2; BCL3; IL4R; BCL6; RALGDS; NR4A1; FOXO1; PTGS2; PLAUR; EGR1; IL6; FOSL1; PFKFB3; ZFP36; CISH; IGFBP1; TNFRSF1A; THBD; EGR3; SOCS1; KLF4; FPR1; SERPINE1; SLC11A1; IL10; …
IL23-mediated signaling events	11	66	3.7931	3.61756	0.000183867	0.306689	0.00486809	0.0222994	CXCL9; SOCS3; CCL2; BCL3; IL6; TNFRSF1A; IL1B; IL18RAP; NFKB2; MAP3K14; IL24;
Direct p53 effectors	17	138	5.86207	2.6732	0.000182882	0.305048	0.00486809	0.0222994	TP53I3; PCBP4; PMS2; AFP; JUN; EPHA2; ATF3; BCL6; SERPINE1; TNFRSF10D; LIF; CDKN1A; VCAN; BCL2A1; MCL1; RGCC; SPP1;
Retinoic acid receptors-mediated signaling	1	47	0.344828	0.465982	0.89213	1	1	1	NR4A1;
E-cadherin signaling in keratinocytes	1	21	0.344828	1.04264	0.629481	1	1	1	RAC1;
IL12-mediated signaling events	17	111	5.86207	3.32338	1.07437e-05	0.0179205	0.000381288	0.00174658	CD3G; SPHK2; GADD45B; FOS; JUN; GADD45G; BCL3; IL6; TNFRSF1A; SOCS1; IL1B; IL18RAP; NFKB2; MAP3K14; CCL3; IRF1; HLA-DRA;
IL2 signaling events mediated by PI3K	7	67	2.41379	2.26891	0.0336579	1	0.449131	1	PRKCZ; MYC; BCL3; TNFRSF1A; NFKB2; MAP3K14; RAC1;
Sphingosine 1-phosphate (S1P) pathway	97	1308	33.4483	1.60858	1.87296e-07	0.000312409	1.86688e-05	8.55168e-05	TP53I3; WNT5A; PEG10; SKP2; PCBP4; CEBPA; PMS2; GPAM; PRKCZ; CD3G; FABP4; AFP; BRCA1; PIGR; GCK; RET; SPHK2; HNF4A; GNAO1; GADD45B; JUNB; FOSB; SOCS3; FOS; MYC; PPP1R15A; JUN; CEBPD; GADD45G; PIM1; FOSL2; CYR61; EPHA2; ATF3; MAP3K8; CCL2; BCL3; IL4R; BCL6; RALGDS; NR4A1; FOXO1; PTGS2; PLAUR; EGR1; IL6; FOSL1; PFKFB3; ZFP36; IGFBP1; TNFRSF1A; THBD; EGR3; SOCS1; KLF4; FPR1; SERPINE1; SLC11A1; IL10;…
Regulation of Androgen receptor activity	8	108	2.75862	1.60845	0.124391	1	1	1	CEBPA; BRCA1; JUN; FOXO1; EGR1; CMTM2; TMPRSS2; MAK;
Proteoglycan syndecan-mediated signaling events	97	1342	33.4483	1.56783	6.66802e-07	0.00111223	2.71275e-05	0.000124264	TP53I3; WNT5A; PEG10; SKP2; PCBP4; CEBPA; PMS2; GPAM; PRKCZ; CD3G; FABP4; AFP; BRCA1; PIGR; GCK; RET; HNF4A; GNAO1; GADD45B; JUNB; FOSB; SOCS3; FOS; MYC; PPP1R15A; JUN; CEBPD; GADD45G; PIM1; FOSL2; CYR61; EPHA2; ATF3; MAP3K8; CCL2; BCL3; THBS1; IL4R; BCL6; RALGDS; NR4A1; FOXO1; PTGS2; PLAUR; EGR1; IL6; FOSL1; PFKFB3; ZFP36; SDC4; IGFBP1; TNFRSF1A; THBD; EGR3; SOCS1; KLF4; FPR1; SERPINE1; SLC11A1;…
Atypical NF-kappaB pathway	1	14	0.344828	1.56359	0.483935	1	1	1	BCL3;
Calcium signaling in the CD4+ TCR pathway	8	29	2.75862	5.98857	3.4075e-05	0.056837	0.00111445	0.00510501	JUNB; FOS; JUN; PTGS2; FOSL1; BATF3; RCAN1; NFATC2;
IL8- and CXCR2-mediated signaling events	1	34	0.344828	0.6441	0.799949	1	1	1	CXCR2;
BMP receptor signaling	21	226	7.24138	2.01621	0.00160912	1	0.0344103	0.157625	PRKCZ; GADD45B; JUNB; FOS; PPP1R15A; JUN; GADD45G; PIM1; MAP3K8; NR4A1; PTGS2; EGR1; FOSL1; EGR3; DUSP10; BATF3; RAC1; RCAN1; NFATC2; PRKCE; RPS6KA5;
Endogenous TLR signaling	9	57	3.10345	3.42777	0.00106138	1	0.022992	0.10532	TLR3; BCL3; TNFRSF1A; NFKB2; MAP3K14; S100A8; VCAN; SAA1; S100A9;
Aurora A signaling	5	64	1.72414	1.69757	0.171422	1	1	1	BRCA1; BCL3; TNFRSF1A; NFKB2; MAP3K14;
RhoA signaling pathway	12	205	4.13793	1.27059	0.236069	1	1	1	PRKCZ; BRCA1; JUNB; SOCS3; FOS; JUN; CYR61; ATF3; IL6; DUSP10; RAC1; CIT;
Class I PI3K signaling events mediated by Akt	95	1285	32.7586	1.60362	3.1509e-07	0.00052557	1.86688e-05	8.55168e-05	TP53I3; WNT5A; PEG10; SKP2; PCBP4; CEBPA; PMS2; GPAM; PRKCZ; CD3G; FABP4; AFP; BRCA1; PIGR; GCK; RET; HNF4A; GNAO1; GADD45B; JUNB; FOSB; SOCS3; FOS; MYC; PPP1R15A; JUN; CEBPD; GADD45G; PIM1; FOSL2; CYR61; EPHA2; ATF3; MAP3K8; CCL2; BCL3; IL4R; BCL6; RALGDS; NR4A1; FOXO1; PTGS2; PLAUR; EGR1; IL6; FOSL1; PFKFB3; ZFP36; IGFBP1; TNFRSF1A; THBD; EGR3; SOCS1; KLF4; FPR1; SERPINE1; SLC11A1; IL10; GJA1; …
LKB1 signaling events	96	1305	33.1034	1.59566	3.3577e-07	0.000560064	1.86688e-05	8.55168e-05	TP53I3; WNT5A; PEG10; SKP2; PCBP4; CEBPA; PMS2; GPAM; PRKCZ; CD3G; FABP4; AFP; BRCA1; PIGR; GCK; RET; HNF4A; GNAO1; GADD45B; JUNB; FOSB; SOCS3; FOS; MYC; PPP1R15A; JUN; CEBPD; GADD45G; PIM1; FOSL2; CYR61; EPHA2; ATF3; MAP3K8; CCL2; BCL3; SIK1; IL4R; BCL6; RALGDS; NR4A1; FOXO1; PTGS2; PLAUR; EGR1; IL6; FOSL1; PFKFB3; ZFP36; IGFBP1; TNFRSF1A; THBD; EGR3; SOCS1; KLF4; FPR1; SERPINE1; SLC11A1; IL10; …
Regulation of RhoA activity	12	205	4.13793	1.27059	0.236069	1	1	1	PRKCZ; BRCA1; JUNB; SOCS3; FOS; JUN; CYR61; ATF3; IL6; DUSP10; RAC1; CIT;
Signaling events mediated by PRL	3	23	1.03448	2.83719	0.086988	1	0.878784	1	EGR1; CDKN1A; RAC1;
Trk receptor signaling mediated by the MAPK pathway	3	34	1.03448	1.91954	0.205251	1	1	1	FOS; EGR1; RPS6KA5;
Trk receptor signaling mediated by PI3K and PLC-gamma	3	63	1.03448	1.03608	0.561065	1	1	1	FOS; EGR1; RPS6KA5;
AndrogenReceptor	3	78	1.03448	0.836863	0.704995	1	1	1	BRCA1; JUN; PNRC1;
Wnt	1	82	0.344828	0.267112	0.979683	1	1	1	RAC1;
KitReceptor	4	54	1.37931	1.61031	0.237048	1	1	1	GRAP; CISH; SOCS1; CSF2RB;
Alpha6Beta4Integrin	1	48	0.344828	0.456276	0.89714	1	1	1	RAC1;
TNF alpha/NF-kB	10	171	3.44828	1.26955	0.263797	1	1	1	PRKCZ; MAP3K8; TNFRSF1A; NFKBIZ; NFKB2; MAP3K14; BIRC3; CASP7; FKBP5; TIFA;
TGFBR	10	125	3.44828	1.73671	0.0620352	1	0.733864	1	JUNB; FOSB; FOS; MYC; JUN; ATF3; FOXO1; TGFB3; CDKN1A; CD44;
ID	1	14	0.344828	1.56359	0.483935	1	1	1	ATF3;
EGFR1	14	138	4.82759	2.20174	0.00434723	1	0.0805686	0.369064	CEBPA; PRKCZ; SOCS3; FOS; MYC; JUN; KLF11; FOXO1; SOCS1; ELF3; GJA1; MAP3K14; RAC1; RGS16;
NOTCH	1	57	0.344828	0.384245	0.932984	1	1	1	SKP2;
Mesenchymal-to-epithelial transition	20	223	6.89655	1.94608	0.00313687	1	0.0601413	0.275492	AKR1B10; EPHA1; ANXA9; OAS1; ICA1; KCNK1; S100P; SDC4; GPRC5A; KLF5; ELF3; IL1RN; TMPRSS2; MTUS1; ARAP2; HPGD; TJP2; TSPAN13; TSPAN8; UGT1A1;
Epithelial-to-mesenchymal transition	19	185	6.55172	2.22856	0.000815861	1	0.0186419	0.0853935	CCL2; RGS2; CRISPLD2; SLC2A3; TUBB6; SERPINE1; GJA1; AKAP12; GFPT2; GPM6B; GEM; TAGLN; PTX3; PMP22; VCAN; CSF2RB; ENPP2; SAMSN1; SRGN;

## Sheet: Protein domain
Analysis: Protein domain
Dataset name: NH
Protein domain	No. of genes in the dataset	No. of genes in the background dataset	Percentage of genes	Fold enrichment	P-value (Hypergeometric test)	Bonferroni method	BH method	Q-value (Storey-Tibshirani method)	genes mapped (from input data set)
coiled coil region	72	2968	15.2542	0.763159	0.997023	1	1	1	CCDC121; HMMR; ZWINT; APOL3; PEG10; KRT222; C19orf25; THAP2; PALMD; C14orf80; SLC12A1; FAM13A; SPC25; MND1; ANKS4B; SPATA18; NINL; AMOT; MTMR4; CENPQ; BRCA1; ORAI3; GCK; CASC5; RNF214; JAKMIP2; GOLM1; KIF22; ARID3C; FAM47E; ACBD5; C15orf52; KANK4; STMN2; FOSB; FAM107A; FILIP1L; ITPRIP; APOLD1; THBS1; FOSL1; HIVEP1; SIPA1L2; TRIM15; NCOA7; PPAN; RRP12; NFKB2; GRAMD4; SYNE2; VNN2; ANGPTL4; GPM6B; B…
UBCc	1	42	0.211864	0.756235	0.743034	1	1	1	UBE2T;
signal peptide	134	3668	28.3898	1.1492	0.0348841	1	1	1	WNT5A; RNF43; APOL3; GRIA3; ISM1; KDELR3; CCL14; EPHA1; C14orf80; EDAR; BTN3A1; TLR3; LRRN3; TNFSF10; ELFN1; CDH15; CHRNB1; CNTNAP2; CD3G; ACE2; AFP; CXCL9; PIGR; FREM2; TMEM92; FCGBP; RET; GPNMB; LRIG3; CA12; PROL1; C2orf82; IFI6; CHST9; COL5A3; LRRC19; DEFA1; ADAMTS1; EPHA2; CCL2; HBEGF; CDH19; THBS1; IL4R; SLITRK3; P4HA1; PLAUR; IL6; CRISPLD2; SDC4; IL1RL1; IGFBP1; TNFRSF1A; THBD; IRAK3; PROK2…
transmembrane domain	177	4771	37.5	1.16701	0.00693033	1	0.840302	1	WNT5A; TMEM169; NAT8B; RNF43; GRIA3; CYP7A1; RTP3; GLT8D1; MAL2; CX3CR1; MOGAT2; MANBAL; SLC29A1; P2RY2; C9orf91; TLR7; SLC25A34; KDELR3; EPHA1; PAQR7; SLC12A1; ABCC5; MARVELD3; EDAR; BTN3A1; TLR3; LRRN3; TNFSF10; TMEM63A; ELFN1; CDH15; CHRNB1; SLC22A7; PAQR4; GIMAP2; CD3G; ACE2; KIAA1161; FADS1; TMEM45B; PCDH18; MAMDC4; TMEM98; ORAI3; PIGR; TRHDE; HTR2B; FREM2; TMEM92; SLC16A13; GGT1; ABCC6; SLC…
TPR	4	93	0.847458	1.35613	0.342803	1	1	1	IFIT3; IFIT2; TTC8; LONRF2;
WW	2	49	0.423729	1.29003	0.46456	1	1	1	PRPF40B; PLEKHA7;
RhoGAP	2	65	0.423729	0.972532	0.616782	1	1	1	FAM13A; ARAP2;
IG	12	340	2.54237	1.11106	0.397234	1	1	1	BTN3A1; PIGR; LRIG3; IL1RL1; FCAR; IL18RAP; MYBPH; MCAM; CD274; VCAN; ICAM1; TREM1;
DSPc	2	28	0.423729	2.2572	0.223175	1	1	1	DUSP10; DUSP6;
GRAM	1	16	0.211864	1.98435	0.403801	1	1	1	GRAMD4;
Arfaptin	1	5	0.211864	6.3412	0.149183	1	1	1	ICA1;
ZnF_U1	2	26	0.423729	2.43077	0.199661	1	1	1	ZMAT3; ZNF385B;
ZnF_C2H2	16	799	3.38983	0.63027	0.984934	1	1	1	ZMAT3; ZNF219; ZNF385B; KLF11; KLF6; BCL6; EGR1; HIVEP1; ZNF331; KLF5; CREB5; EGR3; KLF4; ZNF878; RNF125; ZBTB21;
CA	6	114	1.27119	1.65813	0.155348	1	1	1	CDH15; PCDH18; FREM2; RET; CDH19; CDH23;
EFh	2	144	0.423729	0.439027	0.946147	1	1	1	NINL; EFHD1;
S_TKc	13	307	2.75424	1.33295	0.180806	1	1	1	PRKCZ; PIM1; SIK1; PIM3; MAP3K14; MAK; CIT; MAPK4; PRKCE; RPS6KA5; SGK1; STK17A; WNK3;
BRCT	2	22	0.423729	2.87252	0.153765	1	1	1	BRCA1; RFC1;
ZnMc	3	29	0.635593	3.26367	0.0633598	1	1	1	MMP19; MMP25; MEP1B;
HX	2	23	0.423729	2.74769	0.165051	1	1	1	MMP19; MMP25;
DEXDc	1	112	0.211864	0.28363	0.973543	1	1	1	DDX21;
HELICc	1	111	0.211864	0.286185	0.972667	1	1	1	DDX21;
AT_hook	1	28	0.211864	1.13422	0.595636	1	1	1	ELF3;
RRM	3	221	0.635593	0.428393	0.973462	1	1	1	PPRC1; RBPMS; RBM3;
Sema	1	30	0.211864	1.05863	0.620985	1	1	1	SEMA4B;
PSI	1	44	0.211864	0.721868	0.759158	1	1	1	SEMA4B;
IPT	2	27	0.423729	2.34077	0.211385	1	1	1	NFKB2; NFATC2;
RING	9	311	1.90678	0.911251	0.660123	1	1	1	RNF43; FANCL; BRCA1; RNF214; TRIM15; LONRF2; BAZ1A; BIRC3; RNF125;
SH3	3	216	0.635593	0.438309	0.969969	1	1	1	GRAP; SAMSN1; TJP2;
CH	5	66	1.05932	2.38735	0.0584838	1	1	1	ASPM; SYNE2; TAGLN; CNN1; FLNC;
SPEC	1	32	0.211864	0.992484	0.644749	1	1	1	SYNE2;
LRRNT	5	99	1.05932	1.59165	0.207084	1	1	1	TLR7; TLR3; LRRN3; LRIG3; SLITRK3;
LRR	10	233	2.11864	1.35129	0.208706	1	1	1	LRRC20; TLR7; SKP2; TLR3; LRRN3; ELFN1; LRRC31; LRIG3; LRRC19; SLITRK3;
LRR_TYP	5	132	1.05932	1.19376	0.410224	1	1	1	TLR7; TLR3; LRRN3; LRIG3; SLITRK3;
LRRCT	7	90	1.48305	2.44971	0.0244139	1	1	1	TLR7; TLR3; LRRN3; ELFN1; LRIG3; LRRC19; SLITRK3;
IGc2	8	211	1.69492	1.19404	0.356781	1	1	1	LRRN3; CD3G; LRIG3; IL1RL1; MYBPH; MCAM; NRG1; NCAM2;
KH	1	40	0.211864	0.794037	0.725833	1	1	1	PCBP4;
IG_like	6	128	1.27119	1.47679	0.22269	1	1	1	IL1RL1; FCAR; PVR; MCAM; CD274; ICAM1;
4.1m	2	14	0.423729	4.5128	0.0713243	1	1	1	CNTNAP2; SDC4;
ANK	8	249	1.69492	1.01182	0.538408	1	1	1	ANKRD29; ANKS4B; KANK4; BCL3; NFKBIZ; NFKB2; ANKRD37; RIPK4;
FN3	10	187	2.11864	1.68367	0.0755973	1	1	1	EPHA1; LRRN3; ELFN1; EPHA2; IL4R; MYBPH; FLNC; CSF2RB; LEPR; NCAM2;
BTB	6	179	1.27119	1.05605	0.50599	1	1	1	KBTBD3; BCL6; BACH2; IVNS1ABP; KLHL29; ZBTB21;
FERM_C	2	27	0.423729	2.34077	0.211385	1	1	1	FRMD7; FRMD6;
FA	1	13	0.211864	2.44192	0.343063	1	1	1	FRMD7;
KRAB	2	376	0.423729	0.168145	0.999938	1	1	1	ZNF331; ZNF878;
PAS	1	32	0.211864	0.992484	0.644749	1	1	1	ARNTL2;
HLH	4	116	0.847458	1.08727	0.506159	1	1	1	MYC; ARNTL2; BHLHE40; MXD1;
ZnF_C4	5	46	1.05932	3.4251	0.0149214	1	1	1	HNF4A; NR4A1; NR4A3; NR4A2; NR5A2;
HOLI	5	48	1.05932	3.28242	0.0177066	1	1	1	HNF4A; NR4A1; NR4A3; NR4A2; NR5A2;
WD40	1	269	0.211864	0.118098	0.999845	1	1	1	LYST;
RGS	3	35	0.635593	2.70435	0.0989709	1	1	1	RGS1; RGS2; RGS16;
TBOX	3	17	0.635593	5.56609	0.0155763	1	1	1	TBX10; TBX3; TBX15;
EGF	10	208	2.11864	1.51369	0.127486	1	1	1	CNTNAP2; HBEGF; THBS1; PTGS2; THBD; VCAN; NRG1; SELL; MEP1B; SCUBE1;
EGF_like	4	87	0.847458	1.44965	0.299422	1	1	1	CNTNAP2; FCGBP; LAMC2; SCUBE1;
FYVE	1	33	0.211864	0.962418	0.656067	1	1	1	MTMR4;
Cation_ATPase_N	1	18	0.211864	1.76399	0.441147	1	1	1	ATP2B4;
Tryp_SPc	2	115	0.423729	0.549729	0.884675	1	1	1	PRSS3; TMPRSS2;
UBQ	2	45	0.423729	1.40467	0.421267	1	1	1	UBD; MIDN;
EGF_CA	3	98	0.635593	0.966015	0.606852	1	1	1	THBD; VCAN; SCUBE1;
VWC	4	38	0.847458	3.31844	0.0317421	1	1	1	FCGBP; CYR61; THBS1; COL1A1;
ANX	2	13	0.423729	4.85967	0.0624133	1	1	1	ANXA9; ANXA13;
AAA	4	145	0.847458	0.86983	0.681373	1	1	1	ABCC5; ABCC6; ABCD3; RFC1;
FA58C	1	20	0.211864	1.58768	0.476158	1	1	1	CNTNAP2;
SPRY	4	77	0.847458	1.63789	0.2291	1	1	1	TRIM14; BTN3A1; TRIM15; SPSB1;
CCP	3	55	0.635593	1.72113	0.254373	1	1	1	VCAN; PAPPA; SELL;
IQ	2	84	0.423729	0.75258	0.751764	1	1	1	ASPM; MYH11;
HOX	3	234	0.635593	0.404594	0.980831	1	1	1	ONECUT1; RAX2; PRRX1;
PDZ	4	150	0.847458	0.840837	0.706738	1	1	1	SIPA1L2; PDLIM3; DEPTOR; TJP2;
FH	2	48	0.423729	1.3169	0.453913	1	1	1	FOXO1; FOXC1;
B41	2	51	0.423729	1.23945	0.485481	1	1	1	FRMD7; FRMD6;
RAB	2	64	0.423729	0.987725	0.608314	1	1	1	RAB26; RAB27A;
PH	6	278	1.27119	0.679989	0.880443	1	1	1	RALGPS1; PHLDA1; IRS2; CIT; ARAP2; PLEKHA7;
HDc	1	24	0.211864	1.32317	0.53975	1	1	1	PDE11A;
RHOD	2	22	0.423729	2.87252	0.153765	1	1	1	DUSP10; DUSP6;
S_TK_X	5	56	1.05932	2.81358	0.0321985	1	1	1	PRKCZ; CIT; PRKCE; RPS6KA5; SGK1;
BBOX	2	72	0.423729	0.877993	0.672133	1	1	1	TRIM14; TRIM15;
PRY	3	53	0.635593	1.78606	0.237258	1	1	1	TRIM14; BTN3A1; TRIM15;
C2	2	138	0.423729	0.458114	0.936783	1	1	1	SYT7; PRKCE;
Gal-bind_lectin	2	16	0.423729	3.94905	0.0902573	1	1	1	LGALS4; LGALS8;
GLECT	2	16	0.423729	3.94905	0.0902573	1	1	1	LGALS4; LGALS8;
Kelch	3	58	0.635593	1.63212	0.280344	1	1	1	KBTBD3; IVNS1ABP; KLHL29;
BCL	2	12	0.423729	5.2643	0.0539186	1	1	1	BCL2A1; MCL1;
FBOX	2	52	0.423729	1.21562	0.495749	1	1	1	FBXO27; SKP2;
PAC	1	26	0.211864	1.22143	0.568595	1	1	1	ARNTL2;
CNX	1	19	0.211864	1.67119	0.458935	1	1	1	GJA1;
Connexin_CCC	1	19	0.211864	1.67119	0.458935	1	1	1	GJA1;
HATPase_c	1	18	0.211864	1.76399	0.441147	1	1	1	PMS2;
LIM	2	73	0.423729	0.865967	0.679489	1	1	1	PDLIM3; ABLIM1;
ACTIN	1	31	0.211864	1.02449	0.633059	1	1	1	ACTG2;
PYRIN	1	22	0.211864	1.44341	0.50898	1	1	1	MNDA;
SH2	7	111	1.48305	1.98629	0.0636705	1	1	1	BCAR3; GRAP; SHD; SOCS3; SOCS2; CISH; SOCS1;
TyrKc	3	88	0.635593	1.07578	0.533602	1	1	1	EPHA1; RET; EPHA2;
GuKc	1	26	0.211864	1.22143	0.568595	1	1	1	TJP2;
LINK	3	14	0.635593	6.75797	0.00894726	1	0.917839	1	TNFAIP6; VCAN; CD44;
Glyco_18	1	7	0.211864	4.53201	0.202439	1	1	1	CHI3L1;
CUB	2	49	0.423729	1.29003	0.46456	1	1	1	TNFAIP6; SCUBE1;
PTX	1	7	0.211864	4.53201	0.202439	1	1	1	PTX3;
DEP	1	21	0.211864	1.51211	0.492834	1	1	1	DEPTOR;
Calx_beta	1	9	0.211864	3.52602	0.252368	1	1	1	FREM2;
TIR	3	19	0.635593	4.98049	0.021181	1	1	1	TLR3; IL1RL1; IL18RAP;
PB1	1	14	0.211864	2.26762	0.363966	1	1	1	PRKCZ;
STYKc	2	48	0.423729	1.3169	0.453913	1	1	1	IRAK3; RPS6KA5;
TSP1	5	64	1.05932	2.46194	0.0524755	1	1	1	ISM1; CYR61; ADAMTS1; THBS1; ADAMTS4;
DEATH	3	27	0.635593	3.50534	0.0531054	1	1	1	TNFRSF1A; IRAK3; NFKB2;
PHD	1	92	0.211864	0.345282	0.949286	1	1	1	BAZ1A;
P4Hc	1	16	0.211864	1.98435	0.403801	1	1	1	P4HA1;
LRRcap	1	11	0.211864	2.88551	0.299178	1	1	1	ANP32E;
BRLZ	16	52	3.38983	9.68261	3.0582e-12	2.96646e-09	2.96646e-09	1.53944e-08	DBP; CEBPA; JUNB; FOSB; FOS; JUN; CEBPD; FOSL2; ATF3; NFIL3; BACH2; FOSL1; MAFF; CREB5; NFE2; BATF3;
SAM	6	92	1.27119	2.0546	0.0726925	1	1	1	EPHA1; SAMD3; ANKS4B; EPHA2; ARAP2; SAMSN1;
CT	2	21	0.423729	3.00925	0.14264	1	1	1	CYR61; NBL1;
ZnF_C2HC	1	42	0.211864	0.756235	0.743034	1	1	1	PEG10;
IGc1	2	41	0.423729	1.54168	0.37625	1	1	1	HLA-C; HLA-DRA;
VWD	1	15	0.211864	2.11655	0.384205	1	1	1	FCGBP;
C8	1	12	0.211864	2.64525	0.321474	1	1	1	FCGBP;
TGFB	1	38	0.211864	0.835817	0.707483	1	1	1	TGFB3;
TSPN	2	26	0.423729	2.43077	0.199661	1	1	1	COL5A3; THBS1;
KAZAL	1	47	0.211864	0.675801	0.781471	1	1	1	SLCO1A2;
ZnF_C3H1	3	44	0.635593	2.15131	0.163592	1	1	1	ZFP36; MBNL2; ZFP36L2;
BACK	3	61	0.635593	1.55186	0.30654	1	1	1	KBTBD3; IVNS1ABP; KLHL29;
CLECT	4	86	0.847458	1.4665	0.292247	1	1	1	THBD; VCAN; CLEC7A; SELL;
WNT1	1	19	0.211864	1.67119	0.458935	1	1	1	WNT5A;
small_GTPase	1	35	0.211864	0.907438	0.677635	1	1	1	RASD1;
C1	3	67	0.635593	1.41291	0.35907	1	1	1	PRKCZ; CIT; PRKCE;
DAGKc	1	15	0.211864	2.11655	0.384205	1	1	1	SPHK2;
RA	1	31	0.211864	1.02449	0.633059	1	1	1	RALGDS;
MYSc	1	38	0.211864	0.835817	0.707483	1	1	1	MYH11;
CARD	3	17	0.635593	5.56609	0.0155763	1	1	1	NOL3; CASP4; BIRC3;
CASc	2	14	0.423729	4.5128	0.0713243	1	1	1	CASP4; CASP7;
LDLa	2	47	0.423729	1.34491	0.443146	1	1	1	MAMDC4; TMPRSS2;
SR	1	26	0.211864	1.22143	0.568595	1	1	1	TMPRSS2;
MAM	2	17	0.423729	3.71689	0.100215	1	1	1	MAMDC4; MEP1B;
MATH	1	12	0.211864	2.64525	0.321474	1	1	1	MEP1B;
FHA	1	28	0.211864	1.13422	0.595636	1	1	1	TIFA;
PP2C_SIG	1	15	0.211864	2.11655	0.384205	1	1	1	PDP2;
PP2Cc	1	20	0.211864	1.58768	0.476158	1	1	1	PDP2;
RasGEFN	1	21	0.211864	1.51211	0.492834	1	1	1	RALGDS;
RasGEF	3	29	0.635593	3.26367	0.0633598	1	1	1	BCAR3; RALGPS1; RALGDS;
TNFR	2	26	0.423729	2.43077	0.199661	1	1	1	TNFRSF1A; TNFRSF10D;
TNF	2	18	0.423729	3.51051	0.110459	1	1	1	TNFSF10; TNFSF14;
IGv	1	20	0.211864	1.58768	0.476158	1	1	1	PVR;
GEL	1	8	0.211864	3.96622	0.227806	1	1	1	VIL1;
VHP	2	8	0.423729	7.89317	0.024869	1	1	1	VIL1; ABLIM1;
Carb_anhydrase	1	17	0.211864	1.86769	0.422776	1	1	1	CA12;
SCY	5	44	1.05932	3.58075	0.0124458	1	1	1	CCL14; CXCL9; CCL2; CCL3; CCL20;
Cyt-b5	2	14	0.423729	4.5128	0.0713243	1	1	1	FADS1; FADS2;
Tubulin	1	23	0.211864	1.38068	0.524613	1	1	1	TUBB6;
Tubulin_C	1	22	0.211864	1.44341	0.50898	1	1	1	TUBB6;
TEA	1	4	0.211864	7.92255	0.121239	1	1	1	TEAD4;
EGF_Lam	1	33	0.211864	0.962418	0.656067	1	1	1	LAMC2;
HhH1	1	7	0.211864	4.53201	0.202439	1	1	1	KIF22;
PGAM	1	10	0.211864	3.17377	0.276151	1	1	1	PFKFB3;
LU	1	17	0.211864	1.86769	0.422776	1	1	1	PLAUR;
SERPIN	4	35	0.847458	3.6028	0.0242419	1	1	1	SERPINE1; SERPINB9; SERPINA1; SERPINB2;
ETS	2	28	0.423729	2.2572	0.223175	1	1	1	ETS2; ELF3;
PBD	1	14	0.211864	2.26762	0.363966	1	1	1	CDC42EP3;
DISIN	1	21	0.211864	1.51211	0.492834	1	1	1	ADAM19;
ACR	2	23	0.423729	2.74769	0.165051	1	1	1	ADAMTS1; ADAM19;
CNH	1	13	0.211864	2.44192	0.343063	1	1	1	CIT;
RHO	2	20	0.423729	3.15963	0.131698	1	1	1	RND1; RAC1;
G_alpha	1	16	0.211864	1.98435	0.403801	1	1	1	GNAO1;
GAF	1	8	0.211864	3.96622	0.227806	1	1	1	PDE11A;
SAM_PNT	2	13	0.423729	4.85967	0.0624133	1	1	1	ETS2; ELF3;
LamG	3	44	0.635593	2.15131	0.163592	1	1	1	CNTNAP2; COL5A3; SHBG;
Mab-21	2	12	0.423729	5.2643	0.0539186	1	1	1	C2orf54; ITPRIP;
PlsC	2	18	0.423729	3.51051	0.110459	1	1	1	GPAM; AGPAT9;
HMG	1	51	0.211864	0.622808	0.808045	1	1	1	SOX17;
PQQ	1	6	0.211864	5.28609	0.17624	1	1	1	ERN1;
ArfGap	2	28	0.423729	2.2572	0.223175	1	1	1	AGFG2; ARAP2;
SOCS_box	5	38	1.05932	4.14598	0.00671602	1	0.840302	1	SOCS3; SOCS2; CISH; SOCS1; SPSB1;
SOCS	4	22	0.847458	5.73076	0.00467919	1	0.75647	1	SOCS3; SOCS2; CISH; SOCS1;
GDNF	1	6	0.211864	5.28609	0.17624	1	1	1	GFRA3;
Pept_C1	1	13	0.211864	2.44192	0.343063	1	1	1	CTSS;
BROMO	1	43	0.211864	0.738652	0.751226	1	1	1	BAZ1A;
Lig_chan-Glu_bd	2	18	0.423729	3.51051	0.110459	1	1	1	GRIA3; GRID1;
PBPe	2	18	0.423729	3.51051	0.110459	1	1	1	GRIA3; GRID1;
PTBI	1	12	0.211864	2.64525	0.321474	1	1	1	IRS2;
IRS	1	14	0.211864	2.26762	0.363966	1	1	1	IRS2;
malic	1	3	0.211864	10.5546	0.092379	1	1	1	ME1;
Malic_M	1	3	0.211864	10.5546	0.092379	1	1	1	ME1;
EPH_lbd	2	14	0.423729	4.5128	0.0713243	1	1	1	EPHA1; EPHA2;
DEFSN	3	9	0.635593	10.5082	0.00232418	1	0.563614	1	DEFA1; DEFA1B; DEFA3;
KISc	1	44	0.211864	0.721868	0.759158	1	1	1	KIF22;
eIF5C	1	7	0.211864	4.53201	0.202439	1	1	1	EIF5;
FGF	1	22	0.211864	1.44341	0.50898	1	1	1	FGF14;
Beach	1	9	0.211864	3.52602	0.252368	1	1	1	LYST;
SCP	1	15	0.211864	2.11655	0.384205	1	1	1	CRISPLD2;
IL10	2	5	0.423729	12.6196	0.00946226	1	0.917839	1	IL10; IL24;
FOLN	1	11	0.211864	2.88551	0.299178	1	1	1	FCGBP;
ITAM	1	6	0.211864	5.28609	0.17624	1	1	1	CD3G;
MHC_II_alpha	1	6	0.211864	5.28609	0.17624	1	1	1	HLA-DRA;
UBA	1	32	0.211864	0.992484	0.644749	1	1	1	SIK1;
TY	2	17	0.423729	3.71689	0.100215	1	1	1	IGFBP1; IGFBP2;
RAS	1	23	0.211864	1.38068	0.524613	1	1	1	RASD1;
COLFI	3	11	0.635593	8.59938	0.00435374	1	0.75647	1	COL5A3; COL1A1; COL1A2;
TGc	1	11	0.211864	2.88551	0.299178	1	1	1	TGM2;
DNA_mis_repair	1	4	0.211864	7.92255	0.121239	1	1	1	PMS2;
SAA	1	4	0.211864	7.92255	0.121239	1	1	1	SAA1;
MutL_C	1	2	0.211864	15.8057	0.0625733	1	1	1	PMS2;
Enolase_N	1	4	0.211864	7.92255	0.121239	1	1	1	ENO3;
Enolase_C	1	4	0.211864	7.92255	0.121239	1	1	1	ENO3;
LNS2	1	6	0.211864	5.28609	0.17624	1	1	1	PITPNM2;
NL	1	7	0.211864	4.53201	0.202439	1	1	1	PAPPA;
ARF	1	21	0.211864	1.51211	0.492834	1	1	1	ARL14;
FBG	2	29	0.423729	2.1794	0.235013	1	1	1	ANGPTL4; ITLN2;
ICA69	1	2	0.211864	15.8057	0.0625733	1	1	1	ICA1;
ORANGE	1	10	0.211864	3.17377	0.276151	1	1	1	BHLHE40;
H2A	1	27	0.211864	1.17621	0.582334	1	1	1	HIST1H2AC;
BIR	1	8	0.211864	3.96622	0.227806	1	1	1	BIRC3;
FBA	2	6	0.423729	10.5198	0.0138962	1	1	1	FBXO27; FBXO2;
DDT	1	5	0.211864	6.3412	0.149183	1	1	1	BAZ1A;
DM3	1	12	0.211864	2.64525	0.321474	1	1	1	THAP2;
THAP	1	12	0.211864	2.64525	0.321474	1	1	1	THAP2;
IB	3	18	0.635593	5.25703	0.0182587	1	1	1	CYR61; IGFBP1; IGFBP2;
TLDc	1	5	0.211864	6.3412	0.149183	1	1	1	NCOA7;
zf-3CxxC	2	8	0.423729	7.89317	0.024869	1	1	1	RTP3; RTP4;
BRIGHT	2	15	0.423729	4.21214	0.0806167	1	1	1	ARID3C; ARID5B;
ARID	2	15	0.423729	4.21214	0.0806167	1	1	1	ARID3C; ARID5B;
PKD	2	9	0.423729	7.01712	0.0313103	1	1	1	GPNMB; SORCS1;
Inhibitor_I29	1	7	0.211864	4.53201	0.202439	1	1	1	CTSS;
KASH	1	3	0.211864	10.5546	0.092379	1	1	1	SYNE2;
LamB	1	7	0.211864	4.53201	0.202439	1	1	1	LAMC2;
DDHD	1	6	0.211864	5.28609	0.17624	1	1	1	PITPNM2;
OSTEO	1	1	0.211864	31.4549	0.0317909	1	1	1	SPP1;
H2B	1	21	0.211864	1.51211	0.492834	1	1	1	HIST1H2BF;
LysM	1	6	0.211864	5.28609	0.17624	1	1	1	NCOA7;
LCCL	1	5	0.211864	6.3412	0.149183	1	1	1	CRISPLD2;
LA	1	7	0.211864	4.53201	0.202439	1	1	1	LARP1B;
CADG	1	3	0.211864	10.5546	0.092379	1	1	1	SGCE;
PLP	1	3	0.211864	10.5546	0.092379	1	1	1	GPM6B;
DCX	1	7	0.211864	4.53201	0.202439	1	1	1	DCDC2;
ALBUMIN	1	4	0.211864	7.92255	0.121239	1	1	1	AFP;
IRF	1	9	0.211864	3.52602	0.252368	1	1	1	IRF1;
Aamy	1	8	0.211864	3.96622	0.227806	1	1	1	SLC3A1;
DUF1856	1	2	0.211864	15.8057	0.0625733	1	1	1	AVPR1A;
IG_FLMN	1	10	0.211864	3.17377	0.276151	1	1	1	FLNC;
IL1	2	10	0.423729	6.31611	0.0383273	1	1	1	IL1B; IL1RN;
SO	1	9	0.211864	3.52602	0.252368	1	1	1	ENPP2;
Brix	1	6	0.211864	5.28609	0.17624	1	1	1	PPAN;
FF	1	6	0.211864	5.28609	0.17624	1	1	1	PRPF40B;
IL6	2	2	0.423729	31.4549	0.00100859	0.978332	0.326111	1	IL6; CSF3;
ZM	1	3	0.211864	10.5546	0.092379	1	1	1	PDLIM3;
PUG	1	5	0.211864	6.3412	0.149183	1	1	1	ERN1;
CALCITONIN	1	3	0.211864	10.5546	0.092379	1	1	1	CALCA;
VPS10	1	5	0.211864	6.3412	0.149183	1	1	1	SORCS1;
Endonuclease_NS	1	6	0.211864	5.28609	0.17624	1	1	1	ENPP2;
NUC	1	6	0.211864	5.28609	0.17624	1	1	1	ENPP2;
LIF_OSM	2	2	0.423729	31.4549	0.00100859	0.978332	0.326111	1	LIF; OSM;
CUT	1	7	0.211864	4.53201	0.202439	1	1	1	ONECUT1;
DM15	1	2	0.211864	15.8057	0.0625733	1	1	1	LARP1B;
AMOP	1	4	0.211864	7.92255	0.121239	1	1	1	ISM1;
CoA_trans	1	2	0.211864	15.8057	0.0625733	1	1	1	OXCT2;
eIF2B_5	1	2	0.211864	15.8057	0.0625733	1	1	1	EIF5;
FANCL_C	1	1	0.211864	31.4549	0.0317909	1	1	1	FANCL;
LamGL	1	3	0.211864	10.5546	0.092379	1	1	1	PAPPA;

## Sheet: Site of expression
Analysis: Site of expression
Dataset name: NH
Site of expression	No. of genes in the dataset	No. of genes in the background dataset	Percentage of genes	Fold enrichment	P-value (Hypergeometric test)	Bonferroni method	BH method	Q-value (Storey-Tibshirani method)	genes mapped (from input data set)
T cells	45	1726	7.75862	0.822641	0.933009	1	1	1	HMMR; GRIA3; CX3CR1; UNC119; BRCA1; OAS2; JUNB; NFIL3; PNRC1; RGS2; IL4R; BCL6; BACH2; ZFP36; IL1RL1; SOCS1; PTGER2; IL10; IL1RN; HDC; TNFSF14; IL18RAP; RRP12; NFKB2; SERPINB9; CDKN1A; BAZ1A; GEM; S100A8; EIF5; MCAM; KCNE4; CCL3; IRS2; BCL2A1; ABLIM1; ACKR3; CD44; DDX21; HLA-DRA; ICAM1; NFATC2; RBM3; S100A9; RFC1;
Monocyte	61	2842	10.5172	0.677205	0.999847	1	1	1	SLC29A1; EEF1A2; PIGR; FCGBP; OAS2; GOLM1; FADS2; DBI; SYT7; DEFA1; ADAMTS1; THBS1; NAMPT; P4HA1; S100P; SLC2A3; SIPA1L2; UPP1; PADI4; GPRC5A; CREB5; MYADM; RAB27A; ATP2B4; S100A12; IGFBP2; SERPINB9; PVR; TGM2; CHI3L1; S100A8; EIF5; MTHFD2; SERPINA1; TMPRSS2; RAC1; EFHD1; DHRS13; FLNC; VIL1; HLA-C; ACKR3; ALOX5AP; ANP32E; CD44; CTSS; DDX21; DEFA1B; ERAP2; FABP5; FCER1G; FKBP5; HLA-DRA; MCL1; MME;…
MDA468	19	760	3.27586	0.789055	0.884465	1	1	1	HIST1H2AC; MB; DBI; CYR61; THBS1; PLAUR; S100P; CRISPLD2; SDC4; IGFBP2; STC1; PVR; S100A8; ALDH1A3; EFHD1; CD44; CTSS; DDX21; ICAM1;
Small intestine	320	8360	55.1724	1.20754	2.055e-06	0.00174264	8.3335e-05	0.000287543	FMO1; TP53I3; TYMS; ZWINT; BCAR3; RNF43; APOL3; AKR1B10; ASPM; CKAP2; FBXO27; GRIA3; CYP7A1; LGALS4; PDP2; RTP3; GLT8D1; MAL2; TRIM14; RMND1; FRAT1; ME1; MOGAT2; SLC29A1; C9orf91; PALMD; SKP2; FRMD7; CCL14; EPHA1; PTTG1; SAMD3; ONECUT1; SIRT4; FAM168A; ABCC5; AGFG2; BTN3A1; TLR3; PDE11A; PMS2; PKIB; NINL; NAGS; ZMAT3; CHRNB1; SLC22A7; PAQR4; TBX3; PRKCZ; AMOT; CNTNAP2; PITPNM2; GIMAP2; OSGIN1; CD…
Breast cancer	291	7467	50.1724	1.22944	2.29667e-06	0.00194757	8.8526e-05	0.000305455	FMO1; TP53I3; TYMS; HMMR; ZWINT; BCAR3; RNF43; AKR1B10; ASPM; CKAP2; GRIA3; PDP2; NOL3; RTP3; GLT8D1; IFIT2; RMND1; ME1; MOGAT2; SLC29A1; C9orf91; PALMD; SKP2; FRMD7; CCL14; EPHA1; PTTG1; DBP; SAMD3; SIRT4; AGFG2; BTN3A1; TLR3; PDE11A; PMS2; TNFSF10; PKIB; NINL; CHRNB1; SLC22A7; TBX3; PRKCZ; AMOT; PITPNM2; GIMAP2; OSGIN1; FABP4; ACE2; TTC8; ANXA9; AFP; OAS1; RPL39L; TMEM45B; BRCA1; PCDH18; MAMDC4…
Thyroid cancer	277	7281	47.7586	1.20019	4.65136e-05	0.0394435	0.000873417	0.00301368	FMO1; TP53I3; TYMS; HMMR; ZWINT; BCAR3; RNF43; AKR1B10; ASPM; CKAP2; GRIA3; CYP7A1; PDP2; NOL3; RTP3; GLT8D1; RMND1; ME1; MOGAT2; SLC29A1; P2RY2; C9orf91; PALMD; SKP2; FRMD7; CCL14; EPHA1; PTTG1; DBP; SAMD3; SLC12A1; ONECUT1; SIRT4; AGFG2; BTN3A1; TLR3; PDE11A; PMS2; TNFSF10; PKIB; NINL; CHRNB1; SLC22A7; TBX3; PRKCZ; AMOT; CNTNAP2; PITPNM2; GIMAP2; AMACR; CD3G; ACE2; TTC8; ANXA9; AFP; OAS1; RPL39…
Colon	320	8429	55.1724	1.19765	4.93623e-06	0.00418592	0.00014634	0.00050494	FMO1; TP53I3; TYMS; WNT5A; HMMR; ZWINT; BCAR3; RNF43; APOL3; AKR1B10; ASPM; CKAP2; FBXO27; GRIA3; CYP7A1; LGALS4; PDP2; NOL3; RTP3; GLT8D1; MAL2; TRIM14; RMND1; FRAT1; CX3CR1; MOGAT2; SLC29A1; C9orf91; PALMD; SKP2; CCL14; EPHA1; PTTG1; SAMD3; SLC12A1; RALGPS1; SIRT4; FAM168A; ABCC5; AGFG2; BTN3A1; TLR3; PDE11A; PMS2; TNFSF10; PKIB; NINL; ZMAT3; CHRNB1; SLC22A7; PAQR4; TBX3; PRKCZ; AMOT; CNTNAP2; …
Parathyroid gland	220	5997	37.931	1.15732	0.00443544	1	0.0351519	0.12129	FMO1; TP53I3; TYMS; ZWINT; BCAR3; RNF43; ASPM; CKAP2; CYP7A1; PDP2; NOL3; RTP3; GLT8D1; RMND1; ME1; MOGAT2; SLC29A1; C9orf91; PALMD; FRMD7; CCL14; EPHA1; PTTG1; SAMD3; SIRT4; AGFG2; TLR3; PDE11A; PMS2; TNFSF10; PKIB; CHRNB1; TBX3; PRKCZ; CNTNAP2; PITPNM2; OSGIN1; FABP4; TTC8; ANXA9; AFP; OAS1; RPL39L; TMEM45B; PCDH18; MAMDC4; ORAI3; PIGR; HTR2B; FREM2; ANXA13; GCK; ABCG8; RET; TCAP; UGT1A6; NCAPG…
Cervix, uterine	247	6391	42.5862	1.21924	6.22867e-05	0.0528191	0.00112381	0.00387765	FMO1; TP53I3; TYMS; HMMR; ZWINT; BCAR3; RNF43; AKR1B10; ASPM; CKAP2; GRIA3; PDP2; NOL3; RTP3; GLT8D1; RMND1; ME1; MOGAT2; SLC29A1; P2RY2; C9orf91; PALMD; SKP2; FRMD7; CCL14; EPHA1; PTTG1; SAMD3; SIRT4; AGFG2; TLR3; PDE11A; PMS2; PKIB; NINL; CHRNB1; PRKCZ; PITPNM2; OSGIN1; FABP4; TTC8; ANXA9; AFP; OAS1; RPL39L; TMEM45B; BRCA1; PCDH18; MAMDC4; ORAI3; PIGR; HTR2B; FREM2; FCGBP; SLC22A11; ANXA13; GCK…
Spleen	285	7887	49.1379	1.13997	0.00170671	1	0.0168289	0.0580674	FMO1; TYMS; ZWINT; BCAR3; RNF43; APOL3; PEG10; ASPM; CKAP2; FBXO27; PDP2; RTP3; GLT8D1; TRIM14; RMND1; FRAT1; ME1; MOGAT2; SLC29A1; P2RY2; C9orf91; PALMD; SKP2; CCL14; EPHA1; PTTG1; DBP; SAMD3; RALGPS1; SIRT4; FAM13A; FAM168A; ABCC5; AGFG2; BTN3A1; PDE11A; PMS2; TNFSF10; PKIB; NINL; TMEM63A; ZMAT3; CHRNB1; TBX3; PRKCZ; AMOT; PRPF40B; PITPNM2; GIMAP2; OSGIN1; CD3G; MTMR4; GRAP; ACE2; TTC8; AFP; OA…
HUVEC	411	13061	70.8621	0.992705	0.630975	1	1	1	FMO1; TP53I3; TYMS; WNT5A; GINS2; CCDC121; HMMR; ZWINT; NAT8B; BCAR3; RNF43; APOL3; ASPM; CKAP2; TBX10; FBXO27; GRIA3; LGALS4; IFIT3; GLT8D1; IFIT2; RAB26; TRIM14; RMND1; THAP2; FRAT1; ME1; CX3CR1; PRSS3; MOGAT2; SLC29A1; P2RY2; TLR7; PALMD; SKP2; FRMD7; KDELR3; CCL14; EPHA1; SLC7A6OS; KBTBD3; DBP; SAMD3; C14orf80; SLC12A1; ONECUT1; RALGPS1; FAM13A; FAM168A; C19orf44; ABCC5; MARVELD3; BTN3A1; TLR…
Tonsils	288	7274	49.6552	1.24905	5.85254e-07	0.000496296	4.96296e-05	0.000171244	FMO1; TP53I3; TYMS; HMMR; ZWINT; BCAR3; RNF43; AKR1B10; ASPM; CKAP2; GRIA3; PDP2; NOL3; RTP3; GLT8D1; RMND1; CX3CR1; MOGAT2; SLC29A1; P2RY2; C9orf91; PALMD; SKP2; CCL14; EPHA1; PTTG1; SAMD3; SIRT4; AGFG2; BTN3A1; TLR3; PDE11A; PMS2; TNFSF10; PKIB; NINL; CHRNB1; SLC22A7; TBX3; PRKCZ; AMOT; PITPNM2; GIMAP2; OSGIN1; CD3G; ACE2; ANXA9; AFP; OAS1; RPL39L; TMEM45B; BRCA1; PCDH18; MAMDC4; ORAI3; PIGR; H…
Jurkat A3	84	4200	14.4828	0.630994	1	1	1	1	TYMS; GINS2; HMMR; LRRC20; ASPM; CKAP2; PDP2; C19orf25; RMND1; PRSS3; SKP2; DBP; SPC25; MND1; PDE11A; PMS2; TMEM63A; CD3G; MTMR4; GRAP; UBE2T; FREM2; FCGBP; GGT1; CASC5; RNF214; NCAPG2; OAS2; LRIG3; FADS2; DBI; ACBD5; ACSM1; TRPM8; AGPAT9; THBS1; BCL6; ETNK1; PLAUR; SLC2A3; MAFF; IVNS1ABP; RRS1; LYST; FYTTD1; TUBB6; IGFBP2; NCOA7; PPAN; ERN1; FCAR; RRP12; DHODH; CDH23; PVR; VNN2; EIF5; TAGLN; MTH…
Rectum	269	7113	46.3793	1.19305	0.000110906	0.0940483	0.0017745	0.00612281	FMO1; TP53I3; TYMS; HMMR; ZWINT; RNF43; AKR1B10; ASPM; CKAP2; GRIA3; CYP7A1; LGALS4; PDP2; NOL3; RTP3; GLT8D1; RMND1; MOGAT2; SLC29A1; C9orf91; PALMD; SKP2; FRMD7; CCL14; EPHA1; PTTG1; SAMD3; SLC12A1; SIRT4; AGFG2; BTN3A1; TLR3; PDE11A; PMS2; TNFSF10; PKIB; NINL; CHRNB1; SLC22A7; TBX3; PRKCZ; AMOT; PITPNM2; GIMAP2; AMACR; OSGIN1; CD3G; ACE2; ANXA9; AFP; OAS1; RPL39L; TMEM45B; BRCA1; PCDH18; MAMDC…
Liver	421	11680	72.5862	1.13709	3.40798e-06	0.00288997	0.000120415	0.000415487	FMO1; TP53I3; TYMS; WNT5A; CCDC121; HMMR; ZWINT; BCAR3; APOL3; PEG10; AKR1B10; ASPM; CKAP2; KRT222; FBXO27; GRIA3; CYP7A1; LGALS4; PDP2; IFIT3; NOL3; ISM1; RTP3; GLT8D1; IFIT2; DDO; FBXO2; MAL2; TRIM14; RMND1; FRAT1; ME1; CX3CR1; PRSS3; MOGAT2; SLC29A1; P2RY2; C9orf91; TLR7; SLC25A34; PALMD; SKP2; FRMD7; EEF1A2; CCL14; EPHA1; PTTG1; DBP; SAMD3; ONECUT1; CEBPA; RALGPS1; SIRT4; FAM13A; FAM168A; ABC…
CNS	7	74	1.2069	2.98794	0.00892653	1	0.0669885	0.23114	GRIA3; DDO; AMACR; FOS; KCNK1; MCAM; CD44;
CD4	36	1901	6.2069	0.597563	0.99987	1	1	1	OAS2; DBI; DEFA1; THBS1; S100P; SLC2A3; UPP1; MYADM; RAB27A; S100A12; SERPINB9; S100A8; SERPINA1; RAC1; EFHD1; FLNC; SAA1; HLA-C; ALOX5AP; ANP32E; CD44; COL1A2; CTSS; DDX21; DEFA1B; ERAP2; FABP5; FCER1G; FKBP5; HLA-DRA; MME; MNDA; RBM3; S100A9; SELL; SHBG;
Skeletal muscles	313	9060	53.9655	1.08987	0.0163279	1	0.108816	0.375463	FMO1; TP53I3; TYMS; ZWINT; LRRC20; BCAR3; RNF43; APOL3; PEG10; AKR1B10; ASPM; CKAP2; FBXO27; CYP7A1; PDP2; IFIT3; NOL3; RTP3; GLT8D1; RMND1; FRAT1; ME1; SLC29A1; P2RY2; C9orf91; PALMD; SKP2; EEF1A2; CCL14; EPHA1; PTTG1; DBP; SAMD3; SLC12A1; RALGPS1; SIRT4; FAM13A; FAM168A; ABCC5; PDE11A; PMS2; PKIB; NINL; TMEM63A; ZMAT3; CDH15; SLC22A7; PAQR4; TBX3; PRKCZ; PRPF40B; PITPNM2; GIMAP2; OSGIN1; FABP4;…
H293	142	6792	24.4828	0.659577	1	1	1	1	TP53I3; TYMS; HMMR; ZWINT; PEG10; ASPM; CKAP2; NOL3; C19orf25; FBXO2; ME1; MANBAL; SLC29A1; SKP2; EEF1A2; UNC119; SLC7A6OS; FAM13A; SPC25; PMS2; PKIB; ZMAT3; PRKCZ; AMOT; FABP4; AFP; BRCA1; UBE2T; FCGBP; AP1S1; ANXA13; RNF214; NCAPG2; HNF4A; GOLM1; FADS2; KIF22; DBI; GNAO1; ARID3C; SYT7; ACBD5; DCDC2; JUN; ADAMTS1; EPHA2; ARID5B; ELL; THBS1; SPRY4; NAMPT; P4HA1; ETNK1; PLAUR; SLC2A3; UPP1; GPRC5A…
Prostate	304	7923	52.4138	1.21044	4.58324e-06	0.00388659	0.00014634	0.00050494	FMO1; TP53I3; TYMS; ZWINT; BCAR3; RNF43; APOL3; AKR1B10; ASPM; CKAP2; GRIA3; PDP2; NOL3; RTP3; GLT8D1; TRIM14; RMND1; FRAT1; MOGAT2; SLC29A1; P2RY2; C9orf91; PALMD; SKP2; FRMD7; CCL14; EPHA1; PTTG1; SAMD3; SIRT4; FAM168A; ABCC5; AGFG2; BTN3A1; TLR3; PDE11A; PMS2; TNFSF10; PKIB; NINL; CDH15; CHRNB1; SLC22A7; PAQR4; TBX3; PRKCZ; AMOT; CNTNAP2; PRPF40B; PITPNM2; GIMAP2; AMACR; OSGIN1; CD3G; MTMR4; G…
Jurkat	66	2869	11.3793	0.725809	0.998909	1	1	1	TYMS; HMMR; GLT8D1; FRAT1; SLC29A1; C9orf91; EEF1A2; UNC119; EPHA1; SPC25; PMS2; HIST1H2BF; CD3G; GGT1; JAKMIP2; NCAPG2; FADS2; KIF22; DBI; P4HA1; IL1RL1; IVNS1ABP; KLF4; RASL10A; ATP2B4; ACTG2; ELF3; SLC22A4; PPAN; URB2; DHODH; NFKB2; SYNE2; TGM2; MTHFD2; FRMD6; MYH11; SLC7A1; LAMC2; SEMA4B; HLA-C; ABCD3; AMD1; ANP32E; ARAP2; CASP7; CD44; ERAP2; FABP5; FKBP5; HPGD; ICAM1; MCL1; MME; NUDT13; PLIN…
Bone marrow	294	7808	50.6897	1.18786	4.73788e-05	0.0401772	0.000873417	0.00301368	FMO1; TP53I3; TYMS; WNT5A; HMMR; ZWINT; BCAR3; RNF43; APOL3; ASPM; CKAP2; CYP7A1; PDP2; RTP3; GLT8D1; IFIT2; RMND1; ME1; SLC29A1; P2RY2; C9orf91; PALMD; SKP2; FRMD7; CCL14; EPHA1; PTTG1; DBP; SAMD3; SIRT4; ABCC5; AGFG2; BTN3A1; PDE11A; PMS2; TNFSF10; PKIB; NINL; TMEM63A; CHRNB1; PAQR4; TBX3; PRKCZ; AMOT; CNTNAP2; PITPNM2; GIMAP2; AMACR; OSGIN1; CD3G; FABP4; MTMR4; TTC8; ANXA9; AFP; OAS1; RPL39L; …
Lateral ventricle	245	6620	42.2414	1.16753	0.00128183	1	0.0134196	0.0463037	FMO1; TP53I3; TYMS; HMMR; ZWINT; BCAR3; RNF43; ASPM; CKAP2; GRIA3; CYP7A1; LGALS4; PDP2; NOL3; RTP3; GLT8D1; RMND1; ME1; MOGAT2; SLC29A1; C9orf91; SKP2; FRMD7; CCL14; EPHA1; DBP; SAMD3; SIRT4; AGFG2; PDE11A; PMS2; PKIB; CHRNB1; PRKCZ; AMOT; CNTNAP2; PITPNM2; GIMAP2; OSGIN1; CD3G; ACE2; ANXA9; AFP; OAS1; RPL39L; TMEM45B; BRCA1; PCDH18; MAMDC4; ORAI3; PIGR; HTR2B; UBE2T; FREM2; SLC22A11; ANXA13; GC…
Colorectal cancer	293	7513	50.5172	1.23031	1.86869e-06	0.00158465	8.3335e-05	0.000287543	FMO1; TP53I3; TYMS; HMMR; ZWINT; BCAR3; RNF43; AKR1B10; ASPM; CKAP2; GRIA3; CYP7A1; LGALS4; PDP2; NOL3; RTP3; GLT8D1; RMND1; ME1; MOGAT2; SLC29A1; C9orf91; PALMD; SKP2; FRMD7; CCL14; EPHA1; PTTG1; SAMD3; SIRT4; AGFG2; BTN3A1; TLR3; PDE11A; PMS2; TNFSF10; PKIB; NINL; CHRNB1; SLC22A7; TBX3; PRKCZ; AMOT; PITPNM2; GIMAP2; AMACR; OSGIN1; CD3G; FABP4; ACE2; TTC8; ANXA9; AFP; OAS1; RPL39L; TMEM45B; BRCA…
Gall bladder	273	7295	47.069	1.18059	0.000208005	0.176388	0.00298114	0.0102863	FMO1; TP53I3; TYMS; ZWINT; BCAR3; RNF43; AKR1B10; ASPM; CKAP2; GRIA3; CYP7A1; LGALS4; PDP2; NOL3; RTP3; GLT8D1; RMND1; MOGAT2; SLC29A1; C9orf91; PALMD; SKP2; FRMD7; CCL14; EPHA1; PTTG1; SAMD3; ONECUT1; SIRT4; AGFG2; BTN3A1; TLR3; PDE11A; PMS2; TNFSF10; PKIB; NINL; CHRNB1; SLC22A7; TBX3; PRKCZ; AMOT; PITPNM2; GIMAP2; AMACR; OSGIN1; CD3G; ACE2; TTC8; ANXA9; AFP; OAS1; RPL39L; TMEM45B; BRCA1; PCDH18…
Plasma	380	11971	65.5172	1.0014	0.500678	1	1	1	FMO1; TP53I3; WNT5A; GINS2; CCDC121; HMMR; BCAR3; RNF43; APOL3; AKR1B10; ASPM; CKAP2; KRT222; LGALS4; PDP2; IFIT3; ISM1; GLT8D1; IFIT2; FBXO2; RMND1; THAP2; ME1; PRSS3; SLC29A1; TLR7; PALMD; EEF1A2; UNC119; CCL14; EPHA1; PCBP4; SLC7A6OS; KBTBD3; PAQR7; SAMD3; C14orf80; ANKRD29; SLC12A1; RALGPS1; FAM13A; ABCC5; AGFG2; BTN3A1; TLR3; ANKS4B; LRRN3; PDE11A; PMS2; NINL; HIST1H2BF; NAGS; ZMAT3; ELFN1; …
Malignant carcinoid	266	7081	45.8621	1.18508	0.00021093	0.178868	0.00298114	0.0102863	FMO1; TP53I3; TYMS; ZWINT; BCAR3; RNF43; CKAP2; GRIA3; CYP7A1; LGALS4; PDP2; NOL3; RTP3; GLT8D1; RMND1; ME1; MOGAT2; SLC29A1; C9orf91; PALMD; SKP2; FRMD7; CCL14; EPHA1; PTTG1; SAMD3; ONECUT1; SIRT4; AGFG2; BTN3A1; TLR3; PDE11A; PMS2; TNFSF10; PKIB; NINL; CHRNB1; TBX3; PRKCZ; AMOT; CNTNAP2; PITPNM2; GIMAP2; OSGIN1; CD3G; FABP4; ACE2; TTC8; ANXA9; AFP; OAS1; RPL39L; TMEM45B; BRCA1; PCDH18; MAMDC4; …
Ascites cancer cell	98	3509	16.8966	0.881111	0.931212	1	1	1	TP53I3; HMMR; C11orf52; IFIT3; C19orf25; MAL2; ME1; PRSS3; RTP4; HIST1H2BF; PITPNM2; HIST1H2AC; ANXA9; OAS1; CXCL9; AP1S1; GPNMB; GOLM1; DBI; COL5A3; DEFA1; JUNB; PPP1R15A; CYR61; CCL2; THBS1; NAMPT; P4HA1; PLAUR; S100P; IL6; SLC2A3; SDC4; MAFF; TNFRSF1A; GPRC5A; C5AR1; MYADM; FYTTD1; RAB27A; SERPINE1; ATP2B4; S100A12; IGFBP2; IL1RN; GJA1; SERPINB9; GRAMD4; SYNE2; TGM2; TNFRSF12A; AKAP12; TNFAIP6…
Endometrial cancer	287	7460	49.4828	1.21367	1.00818e-05	0.0085494	0.000259073	0.000893918	FMO1; TP53I3; TYMS; HMMR; ZWINT; BCAR3; RNF43; ASPM; CKAP2; GRIA3; CYP7A1; PDP2; NOL3; RTP3; GLT8D1; IFIT2; RMND1; MOGAT2; SLC29A1; P2RY2; C9orf91; PALMD; SKP2; FRMD7; CCL14; EPHA1; PTTG1; SAMD3; SLC12A1; SIRT4; AGFG2; BTN3A1; TLR3; PDE11A; PMS2; TNFSF10; PKIB; NINL; CHRNB1; SLC22A7; TBX3; PRKCZ; AMOT; CNTNAP2; PITPNM2; GIMAP2; OSGIN1; CD3G; FABP4; ACE2; TTC8; ANXA9; AFP; OAS1; RPL39L; TMEM45B; B…
Lung cancer	291	7435	50.1724	1.23473	1.50189e-06	0.0012736	7.49179e-05	0.000258501	FMO1; TP53I3; TYMS; HMMR; ZWINT; BCAR3; RNF43; AKR1B10; ASPM; CKAP2; GRIA3; CYP7A1; PDP2; NOL3; RTP3; GLT8D1; IFIT2; RMND1; ME1; CX3CR1; MOGAT2; SLC29A1; C9orf91; PALMD; SKP2; FRMD7; CCL14; EPHA1; PTTG1; SAMD3; SIRT4; AGFG2; BTN3A1; TLR3; PDE11A; PMS2; PKIB; NINL; CHRNB1; SLC22A7; TBX3; PRKCZ; AMOT; PITPNM2; GIMAP2; AMACR; OSGIN1; CD3G; FABP4; ACE2; TTC8; ANXA9; AFP; OAS1; RPL39L; TMEM45B; BRCA1;…
HCT116	46	2651	7.93103	0.547502	1	1	1	1	TYMS; ASPM; KRT222; FBXO2; ME1; PRSS3; C9orf91; EEF1A2; NAGS; HIST1H2AC; BRCA1; DBI; GNAO1; STMN2; EPHA2; NAMPT; RRS1; TUBB6; ACTG2; PPAN; RRP12; URB2; SERPINB9; SYNE2; AKAP12; GFPT2; BAZ1A; EIF5; MTHFD2; MYH11; RAC1; ALDH1A3; EFHD1; MAK; VCAN; FLNC; MAPK4; HLA-C; ANP32E; CD44; DDX21; ENO3; FABP5; FKBP5; RBM3; RFC1;
PC3	49	1294	8.44828	1.19479	0.110912	1	0.401065	1	ME1; PRSS3; SLC29A1; EEF1A2; EPHA1; HIST1H2BF; HIST1H2AC; GOLM1; DBI; CYR61; ADAMTS1; EPHA2; THBS1; NAMPT; PLAUR; SDC4; TNFRSF1A; TUBB6; SERPINE1; ACTG2; IGFBP2; ADAM19; PVR; TGM2; LIF; TNFRSF12A; AKAP12; GFPT2; EIF5; PTX3; SERPINA1; MCAM; RAC1; ALDH1A3; VCAN; FLNC; LAMC2; SEMA4B; HLA-C; CD44; DDX21; ENO3; ERAP2; FABP5; FAM20A; ICAM1; RBM3; SGCE; SRGN;
MicroProt	21	440	3.62069	1.50629	0.0417496	1	0.218541	0.754065	CCL14; MB; DBI; DEFA1; THBS1; IGFBP2; NBL1; TNFRSF12A; S100A8; SERPINA1; MTUS1; FLNC; SAA1; CD44; CTSS; DEFA1B; FABP5; ICAM1; S100A9; SPP1; SHBG;
Epididymis	265	7090	45.6897	1.17913	0.000317962	0.269632	0.00421805	0.0145542	FMO1; TP53I3; TYMS; ZWINT; BCAR3; RNF43; AKR1B10; ASPM; CKAP2; GRIA3; CYP7A1; PDP2; NOL3; RTP3; GLT8D1; RMND1; ME1; MOGAT2; SLC29A1; P2RY2; C9orf91; PALMD; SKP2; FRMD7; CCL14; EPHA1; PTTG1; SAMD3; SIRT4; AGFG2; TLR3; PDE11A; PMS2; TNFSF10; PKIB; CDH15; CHRNB1; SLC22A7; TBX3; PRKCZ; AMOT; PITPNM2; GIMAP2; OSGIN1; CD3G; TTC8; ANXA9; AFP; OAS1; RPL39L; TMEM45B; BRCA1; PCDH18; MAMDC4; ORAI3; PIGR; HT…
Cerebellum	273	7633	47.069	1.12831	0.00462334	1	0.0363018	0.125257	FMO1; TP53I3; ZWINT; BCAR3; RNF43; PEG10; ASPM; CKAP2; GRIA3; CYP7A1; PDP2; NOL3; RTP3; GLT8D1; DDO; RAB26; RMND1; ME1; MOGAT2; SLC29A1; C9orf91; PALMD; FRMD7; CCL14; EPHA1; SAMD3; ONECUT1; SIRT4; AGFG2; BTN3A1; TLR3; PDE11A; PMS2; PKIB; NINL; ZMAT3; CDH15; CHRNB1; TBX3; PRKCZ; AMOT; CNTNAP2; PITPNM2; GIMAP2; AMACR; OSGIN1; ACE2; FADS1; TTC8; ANXA9; AFP; OAS1; RPL39L; TMEM45B; BRCA1; PCDH18; MAMD…
Nasopharynx	260	6904	44.8276	1.18805	0.000226965	0.192467	0.00315519	0.0108868	FMO1; TP53I3; TYMS; ZWINT; BCAR3; RNF43; ASPM; CKAP2; GRIA3; CYP7A1; PDP2; NOL3; RTP3; GLT8D1; RMND1; MOGAT2; SLC29A1; P2RY2; C9orf91; PALMD; SKP2; FRMD7; CCL14; EPHA1; PTTG1; DBP; SAMD3; SIRT4; AGFG2; BTN3A1; TLR3; PDE11A; PMS2; PKIB; NINL; CHRNB1; SLC22A7; TBX3; PRKCZ; AMOT; PITPNM2; GIMAP2; ACE2; TTC8; ANXA9; AFP; OAS1; RPL39L; TMEM45B; BRCA1; PCDH18; MAMDC4; ORAI3; PIGR; HTR2B; FREM2; SLC22A1…
global_SCX_fractionated	40	2476	6.89655	0.509754	1	1	1	1	TP53I3; AKR1B10; FBXO2; ME1; SLC29A1; EEF1A2; AMACR; FABP4; DBI; NAMPT; UPP1; RRS1; TUBB6; CASP4; SERPINE1; ATP2B4; IL1RN; RRP12; PVR; SYNE2; S100A8; EIF5; MTHFD2; RAC1; ALDH1A3; EFHD1; LAMC2; ABCD3; ANP32E; CASP7; CD44; DDX21; ERAP2; FABP5; FKBP5; MCL1; MME; RBM3; S100A9; TJP2;
Hippocampus	268	7355	46.2069	1.14951	0.00164373	1	0.0163986	0.0565825	FMO1; TP53I3; TYMS; HMMR; ZWINT; BCAR3; RNF43; PEG10; ASPM; CKAP2; GRIA3; CYP7A1; LGALS4; PDP2; NOL3; RTP3; GLT8D1; DDO; RAB26; RMND1; ME1; MOGAT2; SLC29A1; C9orf91; SKP2; FRMD7; CCL14; EPHA1; SAMD3; SIRT4; AGFG2; BTN3A1; PDE11A; PMS2; TNFSF10; PKIB; NINL; CHRNB1; TBX3; PRKCZ; AMOT; CNTNAP2; PITPNM2; GIMAP2; OSGIN1; CD3G; ACE2; TTC8; AFP; OAS1; RPL39L; TMEM45B; BRCA1; PCDH18; MAMDC4; ORAI3; HTR2B…
HeLa	141	5789	24.3103	0.768405	0.999967	1	1	1	TP53I3; TYMS; GINS2; HMMR; ASPM; CKAP2; NOL3; C19orf25; ME1; PALMD; SKP2; FRMD7; EEF1A2; EPHA1; PCBP4; C19orf44; SPC25; PDE11A; PMS2; HIST1H2BF; ZNF219; PAQR4; PRKCZ; CNTNAP2; PRPF40B; PITPNM2; GIMAP2; GRAP; FADS1; HIST1H2AC; PCDH18; PIGR; TRHDE; UBE2T; GGT1; ABCC6; SLC22A11; ANXA13; GCK; CASC5; NCAPG2; KIF22; MB; GNAO1; ICA1; C15orf52; DCDC2; STMN2; JUNB; MYC; JUN; FAM107A; PHLDA1; ADAMTS1; EPHA…
Malignant lymphoma	256	6586	44.1379	1.22625	2.47939e-05	0.0210253	0.000551925	0.00190439	FMO1; TP53I3; TYMS; HMMR; ZWINT; BCAR3; RNF43; ASPM; CKAP2; GRIA3; CYP7A1; PDP2; NOL3; RTP3; GLT8D1; IFIT2; RMND1; MOGAT2; SLC29A1; C9orf91; PALMD; SKP2; FRMD7; CCL14; EPHA1; PTTG1; SAMD3; SIRT4; AGFG2; BTN3A1; PDE11A; PMS2; TNFSF10; PKIB; NINL; CHRNB1; TBX3; PRKCZ; AMOT; PITPNM2; GIMAP2; TTC8; ANXA9; AFP; OAS1; RPL39L; TMEM45B; BRCA1; PCDH18; MAMDC4; ORAI3; PIGR; HTR2B; UBE2T; FREM2; ANXA13; GCK…
Prostate cancer	275	7214	47.4138	1.20259	4.36616e-05	0.037025	0.000856836	0.00295647	FMO1; TP53I3; TYMS; HMMR; ZWINT; BCAR3; RNF43; ASPM; CKAP2; GRIA3; PDP2; NOL3; RTP3; GLT8D1; IFIT2; RMND1; ME1; MOGAT2; SLC29A1; C9orf91; PALMD; SKP2; FRMD7; CCL14; EPHA1; PTTG1; SAMD3; SIRT4; AGFG2; BTN3A1; TLR3; PDE11A; PMS2; TNFSF10; PKIB; NINL; CHRNB1; SLC22A7; TBX3; PRKCZ; AMOT; CNTNAP2; PITPNM2; GIMAP2; AMACR; OSGIN1; CD3G; TTC8; ANXA9; AFP; OAS1; RPL39L; TMEM45B; BRCA1; PCDH18; MAMDC4; ORA…
Skin	279	7292	48.1034	1.20703	2.58829e-05	0.0219487	0.000551925	0.00190439	FMO1; TYMS; HMMR; ZWINT; BCAR3; RNF43; CKAP2; GRIA3; LGALS4; PDP2; NOL3; RTP3; GLT8D1; RMND1; ME1; CX3CR1; PRSS3; SLC29A1; P2RY2; C9orf91; PALMD; SKP2; FRMD7; CCL14; EPHA1; PTTG1; DBP; SAMD3; ONECUT1; SIRT4; AGFG2; EDAR; BTN3A1; TLR3; PDE11A; PMS2; NINL; CDH15; CHRNB1; SLC22A7; PAQR4; TBX3; PRKCZ; AMOT; PITPNM2; OSGIN1; FABP4; MTMR4; ACE2; TTC8; ANXA9; AFP; OAS1; RPL39L; BRCA1; PCDH18; CXCL9; MAM…
Placenta	379	10894	65.3448	1.09751	0.00203172	1	0.0187272	0.0646172	FMO1; TP53I3; TYMS; HMMR; ZWINT; BCAR3; RNF43; APOL3; PEG10; ASPM; CKAP2; FBXO27; GRIA3; CYP7A1; PDP2; C11orf52; IFIT3; NOL3; RTP3; GLT8D1; MAL2; TRIM14; RMND1; FRAT1; MOGAT2; SLC29A1; P2RY2; C9orf91; PALMD; SKP2; FRMD7; CCL14; EPHA1; PTTG1; DBP; PAQR7; SAMD3; ONECUT1; CEBPA; SIRT4; FAM13A; FAM168A; ABCC5; AGFG2; BTN3A1; TLR3; PDE11A; PMS2; SPTLC3; PKIB; NINL; TMEM63A; ZMAT3; CDH15; CHRNB1; SLC22…
Lung	379	9992	65.3448	1.19658	6.21209e-08	5.26785e-05	1.31696e-05	4.54412e-05	FMO1; TP53I3; TYMS; WNT5A; HMMR; ZWINT; BCAR3; RNF43; APOL3; PEG10; ASPM; CKAP2; FBXO27; GRIA3; CYP7A1; LGALS4; PDP2; IFIT3; NOL3; RTP3; GLT8D1; MAL2; TRIM14; RMND1; FRAT1; ME1; CX3CR1; MOGAT2; SLC29A1; P2RY2; C9orf91; PALMD; SKP2; FRMD7; CCL14; EPHA1; PTTG1; DBP; SAMD3; SLC12A1; ONECUT1; CEBPA; RALGPS1; SIRT4; FAM13A; FAM168A; ABCC5; AGFG2; BTN3A1; TLR3; SPATA18; PDE11A; PMS2; TNFSF10; PKIB; NIN…
Cerebral cortex	264	7099	45.5172	1.17319	0.000473866	0.401838	0.00582374	0.0200945	FMO1; TP53I3; TYMS; HMMR; ZWINT; RNF43; ASPM; CKAP2; GRIA3; CYP7A1; LGALS4; NOL3; RTP3; GLT8D1; DDO; RMND1; ME1; MOGAT2; SLC29A1; C9orf91; SKP2; FRMD7; CCL14; EPHA1; SAMD3; SIRT4; AGFG2; TLR3; PDE11A; PMS2; PKIB; NINL; CHRNB1; SLC22A7; TBX3; PRKCZ; AMOT; CNTNAP2; PITPNM2; GIMAP2; OSGIN1; CD3G; ACE2; TTC8; AFP; OAS1; RPL39L; TMEM45B; BRCA1; PCDH18; MAMDC4; ORAI3; PIGR; HTR2B; FREM2; FCGBP; ANXA13;…
Ovarian cancer	297	7644	51.2069	1.22573	2.06372e-06	0.00175004	8.3335e-05	0.000287543	FMO1; TP53I3; TYMS; HMMR; ZWINT; BCAR3; RNF43; AKR1B10; ASPM; CKAP2; GRIA3; CYP7A1; LGALS4; PDP2; NOL3; RTP3; GLT8D1; RMND1; ME1; CX3CR1; MOGAT2; SLC29A1; P2RY2; C9orf91; PALMD; SKP2; FRMD7; CCL14; EPHA1; PTTG1; DBP; SAMD3; SIRT4; AGFG2; BTN3A1; TLR3; PDE11A; PMS2; TNFSF10; PKIB; NINL; CHRNB1; SLC22A7; TBX3; PRKCZ; AMOT; CNTNAP2; PITPNM2; GIMAP2; AMACR; OSGIN1; CD3G; ACE2; TTC8; ANXA9; AFP; OAS1;…
Kidney	372	10256	64.1379	1.14425	3.50042e-05	0.0296836	0.000706752	0.00243861	FMO1; TP53I3; TYMS; ZWINT; BCAR3; RNF43; APOL3; PEG10; ASPM; CKAP2; FBXO27; GRIA3; CYP7A1; PDP2; IFIT3; NOL3; RTP3; GLT8D1; IFIT2; MAL2; TRIM14; RMND1; FRAT1; CX3CR1; MOGAT2; SLC29A1; C9orf91; PALMD; SKP2; FRMD7; CCL14; EPHA1; PTTG1; DBP; SAMD3; SLC12A1; ONECUT1; RALGPS1; SIRT4; FAM13A; FAM168A; ABCC5; AGFG2; BTN3A1; TLR3; PDE11A; PMS2; TNFSF10; PKIB; NINL; NAGS; TMEM63A; ZMAT3; CHRNB1; SLC22A7; …
H1688	19	1007	3.27586	0.595515	0.995986	1	1	1	AKR1B10; ME1; PRSS3; HIST1H2BF; AMACR; GOLM1; DBI; NAMPT; CALCA; IGFBP2; SYNE2; SERPINA1; VIL1; HLA-C; ANP32E; DDX21; FABP5; SPP1; RFC1;
Sy5y	55	2490	9.48276	0.696924	0.999152	1	1	1	HMMR; PEG10; AKR1B10; ASPM; CKAP2; C19orf25; PRSS3; EEF1A2; PTTG1; C14orf80; MND1; HIST1H2BF; HIST1H2AC; PIGR; UBE2T; RET; GOLM1; FADS2; PROL1; ACBD5; SHD; STMN2; JUNB; ELL; NAMPT; PADI4; CLCF1; RRS1; CDC42EP3; MYADM; TUBB6; ATP2B4; S100A12; IL1RN; DHODH; PVR; GFPT2; S100A8; EIF5; MTHFD2; SERPINA1; MCAM; RAC1; SORCS1; FLNC; ABLIM1; DDX21; ENO3; FABP5; IRF2BPL; MNDA; RBM3; S100A9; SGCE; NCAM2;
Duodenum	270	7275	46.5517	1.17082	0.000434457	0.36842	0.0054988	0.0189734	FMO1; TP53I3; TYMS; HMMR; ZWINT; BCAR3; RNF43; AKR1B10; ASPM; CKAP2; GRIA3; CYP7A1; LGALS4; PDP2; RTP3; GLT8D1; RMND1; ME1; MOGAT2; SLC29A1; C9orf91; PALMD; SKP2; FRMD7; CCL14; EPHA1; PTTG1; SAMD3; ONECUT1; SIRT4; AGFG2; BTN3A1; TLR3; PDE11A; PMS2; TNFSF10; PKIB; NINL; CHRNB1; SLC22A7; TBX3; PRKCZ; AMOT; PITPNM2; GIMAP2; OSGIN1; CD3G; ACE2; ANXA9; AFP; OAS1; RPL39L; TMEM45B; BRCA1; PCDH18; MAMDC4…
Bronchus	264	6923	45.5172	1.20301	7.37572e-05	0.0625461	0.00127645	0.00440433	FMO1; TP53I3; TYMS; ZWINT; RNF43; AKR1B10; ASPM; CKAP2; GRIA3; CYP7A1; PDP2; RTP3; GLT8D1; RMND1; MOGAT2; SLC29A1; P2RY2; C9orf91; PALMD; SKP2; FRMD7; CCL14; EPHA1; PTTG1; SAMD3; SLC12A1; SIRT4; BTN3A1; TLR3; PDE11A; PMS2; PKIB; NINL; CHRNB1; SLC22A7; TBX3; PRKCZ; AMOT; PITPNM2; GIMAP2; OSGIN1; CD3G; ACE2; TTC8; ANXA9; AFP; OAS1; RPL39L; TMEM45B; BRCA1; MAMDC4; ORAI3; PIGR; HTR2B; FCGBP; ANXA13; …
Brain	241	7290	41.5517	1.04292	0.208335	1	0.605026	1	APOL3; PEG10; ASPM; CKAP2; TBX10; FBXO27; GRIA3; CYP7A1; IFIT3; NOL3; DDO; FBXO2; MAL2; TRIM14; FRAT1; ME1; CX3CR1; PRSS3; SKP2; EEF1A2; PTTG1; KBTBD3; DBP; RALGPS1; SIRT4; FAM13A; FAM168A; ABCC5; PMS2; TNFSF10; PKIB; NINL; HIST1H2BF; TMEM63A; ZMAT3; PAQR4; TBX3; AMOT; CNTNAP2; PRPF40B; PITPNM2; AMACR; OSGIN1; MTMR4; FADS1; HIST1H2AC; TTC8; BRCA1; PCDH18; CXCL9; TRHDE; HTR2B; NOL4; AP1S1; GGT1; G…
Stomach	315	8044	54.3103	1.23537	2.36434e-07	0.000200496	2.86423e-05	9.88287e-05	FMO1; TP53I3; TYMS; HMMR; ZWINT; BCAR3; RNF43; APOL3; AKR1B10; ASPM; CKAP2; GRIA3; LGALS4; PDP2; NOL3; RTP3; GLT8D1; MAL2; RMND1; ME1; MOGAT2; SLC29A1; C9orf91; PALMD; SKP2; FRMD7; CCL14; EPHA1; PTTG1; DBP; SAMD3; SIRT4; ABCC5; AGFG2; BTN3A1; TLR3; PDE11A; PMS2; PKIB; NINL; CDH15; CHRNB1; SLC22A7; PAQR4; TBX3; PRKCZ; AMOT; CNTNAP2; PITPNM2; GIMAP2; AMACR; OSGIN1; CD3G; ACE2; TTC8; ANXA9; AFP; OAS…
Pancreas	348	9936	60	1.1049	0.0028354	1	0.0247878	0.0855291	FMO1; TP53I3; TYMS; HMMR; ZWINT; BCAR3; RNF43; APOL3; PEG10; AKR1B10; ASPM; CKAP2; GRIA3; CYP7A1; LGALS4; PDP2; IFIT3; NOL3; RTP3; GLT8D1; FBXO2; TRIM14; RMND1; FRAT1; ME1; PRSS3; MOGAT2; SLC29A1; C9orf91; PALMD; SKP2; FRMD7; EEF1A2; KDELR3; CCL14; EPHA1; PTTG1; SAMD3; RALGPS1; SIRT4; FAM13A; FAM168A; ABCC5; AGFG2; TLR3; PDE11A; PMS2; TNFSF10; PKIB; NINL; TMEM63A; CHRNB1; SLC22A7; PAQR4; TBX3; PR…
Lymph nodes	263	6700	45.3448	1.23834	7.27744e-06	0.00617127	0.000205709	0.000709788	FMO1; TP53I3; TYMS; HMMR; ZWINT; BCAR3; RNF43; ASPM; CKAP2; CYP7A1; PDP2; NOL3; RTP3; GLT8D1; IFIT2; RMND1; MOGAT2; SLC29A1; C9orf91; PALMD; SKP2; CCL14; EPHA1; PTTG1; SAMD3; AGFG2; BTN3A1; PDE11A; PMS2; TNFSF10; PKIB; NINL; CHRNB1; SLC22A7; PAQR4; TBX3; PRKCZ; AMOT; PITPNM2; GIMAP2; AMACR; OSGIN1; CD3G; TTC8; ANXA9; AFP; OAS1; RPL39L; TMEM45B; BRCA1; PCDH18; MAMDC4; ORAI3; HTR2B; UBE2T; FREM2; A…
H358	36	1489	6.2069	0.762904	0.968431	1	1	1	TP53I3; ME1; EEF1A2; SAMD3; HIST1H2BF; AFP; GOLM1; MB; DBI; EPHA2; THBS1; NAMPT; S100P; SDC4; TUBB6; IGFBP2; ADAM19; PVR; TGM2; EIF5; MYH11; ALDH1A3; EFHD1; VCAN; LAMC2; SEMA4B; HLA-C; CD44; CTSS; DDX21; FABP5; RBM3; SELL; SGCE; TJP2; SPP1;
Fallopian tubes	256	6677	44.1379	1.20954	7.21606e-05	0.0611921	0.00127484	0.00439876	FMO1; TP53I3; TYMS; ZWINT; BCAR3; RNF43; ASPM; CKAP2; GRIA3; PDP2; NOL3; RTP3; GLT8D1; RMND1; ME1; MOGAT2; SLC29A1; P2RY2; C9orf91; PALMD; SKP2; FRMD7; CCL14; EPHA1; PTTG1; SAMD3; SLC12A1; SIRT4; AGFG2; BTN3A1; TLR3; PDE11A; PMS2; PKIB; NINL; CHRNB1; SLC22A7; TBX3; PRKCZ; AMOT; PITPNM2; CD3G; ACE2; TTC8; ANXA9; AFP; OAS1; RPL39L; TMEM45B; BRCA1; PCDH18; MAMDC4; ORAI3; HTR2B; UBE2T; FREM2; FCGBP; …
Head & neck cancer	276	7062	47.5862	1.23294	4.7102e-06	0.00399425	0.00014634	0.00050494	FMO1; TP53I3; TYMS; HMMR; ZWINT; BCAR3; RNF43; AKR1B10; ASPM; CKAP2; GRIA3; PDP2; NOL3; RTP3; GLT8D1; IFIT2; RMND1; MOGAT2; SLC29A1; P2RY2; C9orf91; PALMD; SKP2; FRMD7; CCL14; EPHA1; PTTG1; SAMD3; SIRT4; AGFG2; BTN3A1; TLR3; PDE11A; PMS2; PKIB; NINL; CHRNB1; SLC22A7; TBX3; PRKCZ; AMOT; PITPNM2; GIMAP2; OSGIN1; CD3G; FABP4; ACE2; TTC8; ANXA9; AFP; OAS1; RPL39L; TMEM45B; BRCA1; PCDH18; MAMDC4; ORAI…
Pancreatic cancer	319	8316	55	1.21014	1.74376e-06	0.00147871	8.21505e-05	0.000283456	FMO1; TP53I3; TYMS; HMMR; ZWINT; BCAR3; RNF43; AKR1B10; ASPM; CKAP2; GRIA3; CYP7A1; LGALS4; PDP2; NOL3; RTP3; GLT8D1; RMND1; ME1; PRSS3; MOGAT2; SLC29A1; P2RY2; C9orf91; PALMD; SKP2; FRMD7; EEF1A2; KDELR3; CCL14; EPHA1; PTTG1; DBP; SAMD3; SIRT4; AGFG2; BTN3A1; TLR3; PDE11A; PMS2; TNFSF10; PKIB; NINL; CHRNB1; SLC22A7; TBX3; PRKCZ; AMOT; PITPNM2; GIMAP2; AMACR; OSGIN1; CD3G; FABP4; ACE2; TTC8; ANXA…
BT474	17	558	2.93103	0.961628	0.601799	1	1	1	EEF1A2; HIST1H2BF; HIST1H2AC; PIGR; GOLM1; MB; DBI; CYR61; THBS1; SDC4; IGFBP2; TNFRSF12A; SERPINA1; EFHD1; HLA-C; CD44; RBM3;
Seminal vesicle	245	6620	42.2414	1.16753	0.00128183	1	0.0134196	0.0463037	FMO1; TP53I3; TYMS; ZWINT; BCAR3; RNF43; ASPM; CKAP2; GRIA3; PDP2; NOL3; RTP3; GLT8D1; IFIT2; RMND1; MOGAT2; SLC29A1; C9orf91; PALMD; SKP2; FRMD7; CCL14; EPHA1; PTTG1; SAMD3; SIRT4; AGFG2; BTN3A1; TLR3; PDE11A; PMS2; TNFSF10; PKIB; NINL; CHRNB1; SLC22A7; TBX3; PRKCZ; AMOT; PITPNM2; GIMAP2; CD3G; FABP4; ACE2; ANXA9; AFP; OAS1; RPL39L; TMEM45B; BRCA1; PCDH18; MAMDC4; ORAI3; PIGR; HTR2B; UBE2T; FREM…
Urinary bladder	274	7054	47.2414	1.22539	9.25171e-06	0.00784545	0.000253079	0.000873237	FMO1; TP53I3; TYMS; ZWINT; BCAR3; RNF43; ASPM; CKAP2; GRIA3; PDP2; NOL3; RTP3; GLT8D1; RMND1; MOGAT2; SLC29A1; C9orf91; PALMD; SKP2; FRMD7; CCL14; EPHA1; PTTG1; SAMD3; SIRT4; AGFG2; BTN3A1; TLR3; PDE11A; PMS2; TNFSF10; PKIB; NINL; CHRNB1; SLC22A7; PAQR4; TBX3; PRKCZ; AMOT; PITPNM2; GIMAP2; OSGIN1; FABP4; ACE2; TTC8; ANXA9; AFP; OAS1; RPL39L; TMEM45B; BRCA1; PCDH18; MAMDC4; ORAI3; PIGR; HTR2B; UBE…
K-562	34	2513	5.86207	0.42693	1	1	1	1	TYMS; HMMR; EEF1A2; SPC25; FADS1; PIGR; AP1S1; DBI; STMN2; GADD45B; PIM1; SOCS2; ELL; NAMPT; ETS2; TRIM15; TUBB6; RAB27A; RRP12; SERPINB9; TGM2; BAZ1A; S100A8; EIF5; FLNC; ANP32E; ARAP2; DDX21; FABP5; FKBP5; HPGD; SAMSN1; TJP2; RFC1;
Salivary glands	252	6607	43.4483	1.20325	0.000128738	0.10917	0.00191526	0.00660852	FMO1; TP53I3; ZWINT; BCAR3; RNF43; APOL3; ASPM; CKAP2; GRIA3; CYP7A1; LGALS4; PDP2; NOL3; RTP3; RMND1; MOGAT2; SLC29A1; P2RY2; C9orf91; PALMD; FRMD7; CCL14; EPHA1; PTTG1; SAMD3; SIRT4; AGFG2; BTN3A1; PDE11A; PMS2; PKIB; NINL; CDH15; CHRNB1; SLC22A7; TBX3; PRKCZ; AMOT; PITPNM2; GIMAP2; AMACR; OSGIN1; MTMR4; ANXA9; AFP; OAS1; RPL39L; PCDH18; MAMDC4; ORAI3; PIGR; HTR2B; FREM2; FCGBP; ABCC6; ANXA13; …
Testis	362	10269	62.4138	1.11208	0.00104552	0.886603	0.0115143	0.0397296	FMO1; TP53I3; TYMS; HMMR; ZWINT; BCAR3; RNF43; PEG10; AKR1B10; ASPM; CKAP2; GRIA3; CYP7A1; LGALS4; PDP2; NOL3; RTP3; GLT8D1; FBXO2; MAL2; TRIM14; RMND1; FRAT1; ME1; MOGAT2; SLC29A1; C9orf91; PALMD; SKP2; FRMD7; CCL14; EPHA1; PTTG1; DBP; PAQR7; SAMD3; SLC12A1; ONECUT1; SIRT4; FAM13A; FAM168A; ABCC5; AGFG2; BTN3A1; TLR3; PDE11A; PMS2; TNFSF10; PKIB; NINL; HIST1H2BF; TMEM63A; ZMAT3; CHRNB1; SLC22A7;…
MDA231	12	336	2.06897	1.12755	0.378025	1	0.904338	1	PRSS3; HIST1H2BF; HIST1H2AC; CYR61; NAMPT; IL6; SDC4; SERPINE1; PTX3; FLNC; LAMC2; CD44;
Urothelial cancer	295	7521	50.8621	1.23739	9.08605e-07	0.000770497	6.42081e-05	0.000221547	FMO1; TP53I3; TYMS; HMMR; ZWINT; BCAR3; RNF43; AKR1B10; ASPM; CKAP2; GRIA3; CYP7A1; PDP2; NOL3; RTP3; GLT8D1; RMND1; ME1; MOGAT2; SLC29A1; P2RY2; C9orf91; PALMD; SKP2; FRMD7; CCL14; EPHA1; PTTG1; SAMD3; SLC12A1; SIRT4; AGFG2; BTN3A1; TLR3; PDE11A; PMS2; PKIB; NINL; CHRNB1; SLC22A7; TBX3; PRKCZ; AMOT; PITPNM2; GIMAP2; AMACR; OSGIN1; FABP4; ACE2; TTC8; ANXA9; AFP; OAS1; RPL39L; TMEM45B; BRCA1; PCDH…
R	30	1948	5.17241	0.485981	0.999999	1	1	1	ME1; AP1S1; RNF214; NCAPG2; KIF22; DBI; JUNB; THBS1; NAMPT; P4HA1; UPP1; TUBB6; SERPINB9; TGM2; EIF5; MTHFD2; CNN1; RAC1; EFHD1; SERPINB2; FLNC; GAGE2B; GAGE12C; GAGE4; GAGE5; ANP32E; DDX21; FKBP5; SAMSN1; TJP2;
Soft tissue	269	6969	46.3793	1.2177	2.12629e-05	0.0180309	0.000500859	0.00172819	FMO1; TP53I3; ZWINT; BCAR3; RNF43; ASPM; CKAP2; GRIA3; CYP7A1; PDP2; NOL3; RTP3; GLT8D1; RMND1; ME1; MOGAT2; SLC29A1; C9orf91; PALMD; FRMD7; CCL14; EPHA1; PTTG1; DBP; SAMD3; SLC12A1; SIRT4; AGFG2; BTN3A1; TLR3; PDE11A; PMS2; TNFSF10; PKIB; NINL; CDH15; CHRNB1; SLC22A7; PRKCZ; PITPNM2; GIMAP2; OSGIN1; FABP4; TTC8; ANXA9; AFP; OAS1; RPL39L; TMEM45B; PCDH18; MAMDC4; ORAI3; PIGR; HTR2B; UBE2T; FREM2;…
Testis cancer	280	7248	48.2759	1.21871	1.05019e-05	0.00890565	0.000261931	0.00090378	FMO1; TP53I3; TYMS; HMMR; ZWINT; BCAR3; RNF43; AKR1B10; ASPM; CKAP2; GRIA3; CYP7A1; PDP2; NOL3; RTP3; GLT8D1; IFIT2; RMND1; ME1; MOGAT2; SLC29A1; C9orf91; PALMD; SKP2; FRMD7; CCL14; EPHA1; PTTG1; SAMD3; ONECUT1; SIRT4; AGFG2; BTN3A1; TLR3; PDE11A; PMS2; PKIB; NINL; CHRNB1; SLC22A7; TBX3; PRKCZ; AMOT; PITPNM2; GIMAP2; OSGIN1; ACE2; TTC8; ANXA9; AFP; OAS1; RPL39L; TMEM45B; BRCA1; PCDH18; MAMDC4; OR…
Neutrophil	58	2031	10	0.901022	0.821783	1	1	1	HIST1H2BF; CRYAA; PIGR; FCGBP; GGT1; CASC5; OAS2; DEFA1; JUNB; THBS1; NAMPT; P4HA1; PLAUR; S100P; SLC2A3; PADI4; GPRC5A; KLF5; RRS1; MYADM; TUBB6; RAB27A; ATP2B4; S100A12; IGFBP2; FOXC1; MMP19; RRP12; SERPINB9; TGM2; CHI3L1; MLF1; S100A8; EIF5; PTX3; SERPINA1; MCAM; RAC1; EFHD1; VCAN; HLA-C; ALOX5AP; ANP32E; CD44; COL1A2; CTSS; DDX21; DEFA1B; FABP5; HLA-DRA; ICAM1; MME; MNDA; S100A9; SELL; SRGN; …
CD8	64	3327	11.0345	0.60693	0.999999	1	1	1	TYMS; CKAP2; IFIT3; IFIT2; FBXO2; EEF1A2; CEBPA; SPC25; AFP; PIGR; RNF214; NCAPG2; OAS2; KIF22; DBI; GNAO1; DEFA1; THBS1; NAMPT; UPP1; MYADM; TUBB6; RAB27A; ATP2B4; DHODH; SERPINB9; SYNE2; TGM2; BAZ1A; S100A8; EIF5; MTHFD2; SERPINA1; RAC1; EFHD1; VCAN; FLNC; VIL1; SAA1; GAGE2B; HLA-C; GAGE12C; GAGE4; GAGE5; ALOX5AP; ANP32E; CD44; CTSS; DDX21; DEFA1B; ERAP2; FABP5; FCER1G; FKBP5; HLA-DRA; ICAM1; M…
Stomach cancer	293	7399	50.5172	1.24926	3.92554e-07	0.000332886	3.69873e-05	0.000127623	FMO1; TP53I3; TYMS; HMMR; ZWINT; BCAR3; RNF43; AKR1B10; ASPM; CKAP2; GRIA3; CYP7A1; LGALS4; PDP2; NOL3; RTP3; GLT8D1; IFIT2; RMND1; ME1; MOGAT2; SLC29A1; C9orf91; PALMD; SKP2; FRMD7; CCL14; EPHA1; PTTG1; DBP; SAMD3; SIRT4; AGFG2; BTN3A1; TLR3; PDE11A; PMS2; TNFSF10; PKIB; NINL; CHRNB1; SLC22A7; TBX3; PRKCZ; AMOT; CNTNAP2; PITPNM2; GIMAP2; AMACR; OSGIN1; CD3G; ACE2; TTC8; ANXA9; AFP; OAS1; RPL39L;…
Skin cancer	272	7029	46.8966	1.22077	1.44723e-05	0.0122725	0.000350644	0.00120988	FMO1; TP53I3; TYMS; HMMR; ZWINT; BCAR3; RNF43; AKR1B10; ASPM; CKAP2; GRIA3; CYP7A1; PDP2; NOL3; RTP3; GLT8D1; IFIT2; RMND1; ME1; MOGAT2; SLC29A1; P2RY2; C9orf91; PALMD; SKP2; FRMD7; CCL14; EPHA1; PTTG1; SAMD3; SIRT4; AGFG2; BTN3A1; TLR3; PDE11A; PMS2; PKIB; NINL; CHRNB1; SLC22A7; TBX3; PRKCZ; AMOT; PITPNM2; GIMAP2; OSGIN1; FABP4; ACE2; TTC8; ANXA9; AFP; OAS1; RPL39L; TMEM45B; BRCA1; PCDH18; MAMDC…
Adrenal glands	283	7554	48.7931	1.18187	0.000123003	0.104306	0.00189267	0.00653055	FMO1; TP53I3; TYMS; ZWINT; BCAR3; RNF43; APOL3; AKR1B10; ASPM; CKAP2; CYP7A1; LGALS4; PDP2; NOL3; RTP3; GLT8D1; RMND1; ME1; MOGAT2; SLC29A1; C9orf91; PALMD; SKP2; FRMD7; CCL14; EPHA1; PTTG1; DBP; SAMD3; CEBPA; RALGPS1; SIRT4; AGFG2; BTN3A1; TLR3; PDE11A; PMS2; PKIB; NINL; ZMAT3; SLC22A7; PAQR4; TBX3; PRKCZ; AMOT; PITPNM2; GIMAP2; AMACR; OSGIN1; MTMR4; ACE2; TTC8; ANXA9; AFP; OAS1; RPL39L; TMEM45B…
TOV112D	39	1276	6.72414	0.964421	0.618889	1	1	1	HIST1H2BF; HIST1H2AC; FREM2; GOLM1; DBI; CYR61; THBS1; NAMPT; P4HA1; IL6; SDC4; TUBB6; IGFBP2; MMP19; RRP12; PVR; TGM2; ANGPTL4; EIF5; TAGLN; PTX3; SERPINA1; MCAM; VCAN; LAMC2; SEMA4B; HLA-C; ANP32E; CD44; COL1A1; COL1A2; DDX21; FABP5; ICAM1; RBM3; SGCE; SRGN; TJP2; SPP1;
LNCaP	41	1455	7.06897	0.889136	0.808513	1	1	1	ME1; EEF1A2; EPHA1; HIST1H2BF; CDH15; HIST1H2AC; PIGR; FCGBP; GOLM1; CA12; MB; DBI; ADAMTS1; THBS1; SLITRK3; NAMPT; SDC4; TNFRSF1A; TUBB6; ACTG2; IGFBP2; STC1; PVR; SYNE2; TNFRSF12A; SERPINA1; SEMA4B; CCL20; GAGE2B; HLA-C; GAGE12C; GAGE4; GAGE5; DDX21; ENO3; FKBP5; IRF2BPL; MME; RBM3; S100A9; NCAM2;
Corpus, uterine	266	6997	45.8621	1.19931	8.51164e-05	0.0721787	0.00141527	0.00488331	FMO1; TP53I3; TYMS; HMMR; ZWINT; BCAR3; RNF43; ASPM; CKAP2; GRIA3; PDP2; NOL3; RTP3; GLT8D1; RMND1; MOGAT2; SLC29A1; P2RY2; C9orf91; PALMD; SKP2; FRMD7; CCL14; EPHA1; PTTG1; SAMD3; SLC12A1; SIRT4; AGFG2; BTN3A1; TLR3; PDE11A; PMS2; PKIB; NINL; CHRNB1; TBX3; PRKCZ; PITPNM2; GIMAP2; OSGIN1; CD3G; TTC8; ANXA9; AFP; OAS1; RPL39L; TMEM45B; BRCA1; PCDH18; MAMDC4; ORAI3; PIGR; HTR2B; FREM2; ANXA13; GCK;…
Appendix	277	7004	47.7586	1.24765	1.45757e-06	0.00123602	7.49179e-05	0.000258501	FMO1; TP53I3; TYMS; HMMR; ZWINT; BCAR3; RNF43; AKR1B10; ASPM; CKAP2; GRIA3; CYP7A1; LGALS4; PDP2; NOL3; RTP3; GLT8D1; RMND1; MOGAT2; SLC29A1; P2RY2; C9orf91; PALMD; SKP2; FRMD7; CCL14; EPHA1; PTTG1; SAMD3; SLC12A1; SIRT4; AGFG2; BTN3A1; PDE11A; PMS2; PKIB; NINL; CHRNB1; SLC22A7; TBX3; PRKCZ; AMOT; CNTNAP2; PITPNM2; GIMAP2; OSGIN1; FABP4; ACE2; TTC8; ANXA9; AFP; OAS1; RPL39L; TMEM45B; BRCA1; PCDH1…
Erythrocytes	20	1539	3.44828	0.410157	1	1	1	1	TP53I3; GINS2; APOL3; SLC7A6OS; AGFG2; AP1S1; DEFA1; NAMPT; NFE2; TGM2; S100A8; EIF5; RAC1; ANP32E; DEFA1B; FABP5; FKBP5; RBM3; S100A9; GSTT1;
HTB75	32	1277	5.51724	0.790744	0.935523	1	1	1	WNT5A; NOL3; EEF1A2; HIST1H2BF; HIST1H2AC; GOLM1; DBI; CYR61; THBS1; NAMPT; P4HA1; PLAUR; IL6; SLC2A3; SDC4; TUBB6; IGFBP2; STC1; PVR; TGM2; MTHFD2; SERPINA1; MCAM; FLNC; LAMC2; SAA1; HLA-C; CD44; FABP5; ICAM1; RBM3; SRGN;
Smooth muscle cells	194	5124	33.4483	1.19442	0.00200992	1	0.0187272	0.0646172	FMO1; TYMS; ZWINT; RNF43; ASPM; CKAP2; CYP7A1; PDP2; RTP3; GLT8D1; RMND1; SLC29A1; C9orf91; PALMD; SKP2; CCL14; PTTG1; DBP; SAMD3; SLC12A1; SIRT4; AGFG2; PMS2; PKIB; NINL; CDH15; CHRNB1; PITPNM2; ANXA9; AFP; OAS1; RPL39L; TMEM45B; PCDH18; MAMDC4; ORAI3; PIGR; HTR2B; FREM2; ANXA13; GCK; CASC5; ABCG8; RET; UGT1A6; NCAPG2; OAS2; GOLM1; LRIG3; FADS2; CA12; MB; DBI; ICA1; ACBD5; CHST9; COL5A3; MRAP; K…
Thymocyte	1	48	0.172414	0.663643	0.787374	1	1	1	HMMR;
Gastric juice	12	243	2.06897	1.55906	0.0868705	1	0.359989	1	AKR1B10; PRSS3; PIGR; FCGBP; S100P; IL1RN; S100A8; SERPINA1; CTSS; DEFA3; ENO3; S100A9;
Urine	133	3267	22.931	1.28434	0.000970348	0.822855	0.010827	0.0373582	TP53I3; AKR1B10; C11orf52; IFIT3; MAL2; RAB26; ME1; PRSS3; EEF1A2; EPHA1; SLC12A1; C2orf54; HIST1H2BF; TMEM63A; ELFN1; CDH15; PRKCZ; CNTNAP2; AMACR; GSTCD; FABP4; ACE2; CRYAA; PIGR; TRHDE; FREM2; FCGBP; GGT1; SLC22A11; ANXA13; RBP5; GPNMB; GOLM1; CA12; DBI; COL5A3; ACSM1; SLC5A12; LRRC19; DEFA1; TRPM8; CYR61; ADAMTS1; EPHA2; HBEGF; CDH19; THBS1; IL4R; NAMPT; PLAUR; S100P; CRISPLD2; HIVEP1; SDC4; …
Heart	211	5507	36.3793	1.20874	0.000565732	0.47974	0.00675691	0.0233144	TYMS; WNT5A; HMMR; BCAR3; APOL3; PEG10; CKAP2; FBXO27; CYP7A1; NOL3; MAL2; TRIM14; FRAT1; PALMD; SKP2; EEF1A2; CCL14; PTTG1; RALGPS1; SIRT4; FAM13A; FAM168A; ABCC5; TLR3; PDE11A; PKIB; NINL; TMEM63A; ZMAT3; PAQR4; TBX3; PRKCZ; AMOT; PRPF40B; PITPNM2; GIMAP2; OSGIN1; MTMR4; ACE2; FADS1; TTC8; BRCA1; PCDH18; TRHDE; HTR2B; AP1S1; GGT1; JAKMIP2; RBP5; TCAP; GOLM1; MB; USP18; SYT7; ICA1; ACBD5; CHST9;…
Amygdala	37	1204	6.37931	0.969692	0.603354	1	1	1	PEG10; RAB26; NINL; CNTNAP2; OSGIN1; ACE2; PCDH18; RBP5; GOLM1; USP18; DBI; ACBD5; DCDC2; CYR61; ITPRIP; IER3; FGF14; PROK2; RASL10A; RND1; CDH23; SYNE2; GFPT2; XKR4; SBNO2; NRG1; MTUS1; SEMA4B; RCAN1; GFRA3; ARNTL2; IRF2BPL; KLHL29; ZBTB21; GRID1; HYDIN; NCAM2;
Red blood cells	4	166	0.689655	0.762	0.775718	1	1	1	SLC29A1; TNFSF10; MT1A; CD44;
Thyroid gland	282	7306	48.6207	1.21767	1.00669e-05	0.00853669	0.000259073	0.000893918	FMO1; TP53I3; TYMS; ZWINT; BCAR3; RNF43; ASPM; CKAP2; GRIA3; CYP7A1; LGALS4; PDP2; NOL3; RTP3; GLT8D1; MAL2; RMND1; ME1; SLC29A1; C9orf91; PALMD; SKP2; FRMD7; CCL14; EPHA1; PTTG1; DBP; SAMD3; SIRT4; AGFG2; BTN3A1; TLR3; PDE11A; PMS2; PKIB; NINL; CDH15; CHRNB1; SLC22A7; TBX3; PRKCZ; PITPNM2; GIMAP2; OSGIN1; CD3G; MTMR4; ACE2; TTC8; ANXA9; AFP; OAS1; RPL39L; TMEM45B; BRCA1; PCDH18; CXCL9; MAMDC4; O…
H460	30	736	5.17241	1.28625	0.0958362	1	0.369405	1	AKR1B10; ME1; EEF1A2; GOLM1; DBI; CYR61; ADAMTS1; NAMPT; P4HA1; IL6; IGFBP2; ADAM19; STC1; SERPINB9; PVR; ANGPTL4; PTX3; MCAM; PAPPA; SERPINB2; HLA-C; ANP32E; CD44; DDX21; ENPP2; FABP5; RBM3; SRGN; SCUBE1; SPP1;
Heart muscle	231	6191	39.8276	1.1771	0.00125736	1	0.0134196	0.0463037	FMO1; TP53I3; TYMS; HMMR; ZWINT; BCAR3; RNF43; ASPM; CKAP2; PDP2; NOL3; RTP3; GLT8D1; RMND1; ME1; MOGAT2; SLC29A1; C9orf91; PALMD; SKP2; FRMD7; CCL14; EPHA1; DBP; SAMD3; SLC12A1; SIRT4; TLR3; PDE11A; PMS2; PKIB; NINL; CDH15; CHRNB1; SLC22A7; TBX3; PRKCZ; PITPNM2; GIMAP2; OSGIN1; ACE2; ANXA9; AFP; OAS1; RPL39L; TMEM45B; BRCA1; PCDH18; MAMDC4; ORAI3; PIGR; HTR2B; FREM2; SLC22A11; ANXA13; GCK; CASC5…
B Cell	62	2254	10.6897	0.867862	0.901151	1	1	1	IFIT3; TLR7; EEF1A2; HIST1H2BF; HIST1H2AC; AFP; PIGR; OAS2; MB; DBI; GNAO1; DEFA1; FOS; BCL3; RGS1; THBS1; IL4R; BCL6; NAMPT; S100P; IL6; HIVEP1; SLC2A3; TNFRSF1A; PADI4; TUBB6; ACTG2; S100A12; IGFBP2; DHODH; SERPINB9; PVR; SYNE2; CDKN1A; S100A8; EIF5; SERPINA1; CSF3; MYH11; RAC1; ALDH1A3; CCL3; RFX2; BCL2A1; FLNC; HLA-C; ABCD3; ACKR3; ALOX5AP; ANP32E; CD44; CTSS; DDX21; DEFA1B; FABP5; FCER1G; HL…
Spinal cord	49	1465	8.44828	1.05533	0.367458	1	0.882732	1	APOL3; PEG10; GRIA3; DDO; PDE11A; NINL; CDH15; CNTNAP2; ACE2; PCDH18; RBP5; USP18; ACBD5; CHST9; CYR61; NFIL3; KLF11; ITPRIP; IER3; BACH2; NR4A1; GPRC5A; PROK2; RND1; CALCA; PTGER2; SLC22A4; NCOA7; CDH23; SYNE2; GFPT2; SLCO1A2; GPM6B; XKR4; SBNO2; MTUS1; SEMA4B; RCAN1; GFRA3; ALOX5AP; ARAP2; ARNTL2; HAMP; IRF2BPL; KLHL29; LGALS8; SCD; GRID1; HYDIN;
Malignant glioma	284	7169	48.9655	1.24974	7.46253e-07	0.000632822	5.75293e-05	0.000198502	FMO1; TP53I3; TYMS; HMMR; ZWINT; BCAR3; RNF43; ASPM; CKAP2; GRIA3; PDP2; NOL3; RTP3; GLT8D1; IFIT2; RMND1; ME1; MOGAT2; SLC29A1; C9orf91; PALMD; SKP2; FRMD7; CCL14; EPHA1; PTTG1; SAMD3; SLC12A1; SIRT4; AGFG2; BTN3A1; TLR3; PDE11A; PMS2; TNFSF10; PKIB; NINL; CHRNB1; SLC22A7; TBX3; PRKCZ; AMOT; CNTNAP2; PITPNM2; GIMAP2; OSGIN1; CD3G; FABP4; TTC8; ANXA9; AFP; OAS1; RPL39L; TMEM45B; BRCA1; PCDH18; MA…
Cervical cancer	294	7426	50.6897	1.24897	3.72369e-07	0.000315769	3.69873e-05	0.000127623	FMO1; TP53I3; TYMS; HMMR; ZWINT; BCAR3; RNF43; AKR1B10; ASPM; CKAP2; GRIA3; CYP7A1; PDP2; NOL3; RTP3; GLT8D1; RMND1; ME1; CX3CR1; MOGAT2; SLC29A1; P2RY2; C9orf91; PALMD; SKP2; FRMD7; CCL14; EPHA1; PTTG1; DBP; SAMD3; SIRT4; AGFG2; BTN3A1; TLR3; PDE11A; PMS2; PKIB; NINL; CHRNB1; SLC22A7; TBX3; PRKCZ; AMOT; PITPNM2; GIMAP2; OSGIN1; CD3G; FABP4; ACE2; TTC8; ANXA9; AFP; OAS1; RPL39L; TMEM45B; BRCA1; P…
Malignant melanoma	290	7459	50	1.22653	3.09376e-06	0.00262351	0.000114066	0.000393577	FMO1; TP53I3; TYMS; HMMR; ZWINT; BCAR3; RNF43; ASPM; CKAP2; GRIA3; CYP7A1; PDP2; NOL3; RTP3; GLT8D1; IFIT2; RMND1; MOGAT2; SLC29A1; P2RY2; C9orf91; PALMD; SKP2; FRMD7; CCL14; EPHA1; PTTG1; SAMD3; SLC12A1; ONECUT1; SIRT4; AGFG2; BTN3A1; TLR3; PDE11A; PMS2; TNFSF10; PKIB; NINL; CHRNB1; SLC22A7; TBX3; PRKCZ; AMOT; CNTNAP2; PITPNM2; GIMAP2; OSGIN1; CD3G; ACE2; TTC8; ANXA9; AFP; OAS1; RPL39L; TMEM45B;…
Oesophagus	47	921	8.10345	1.61017	0.000903707	0.766344	0.0102179	0.0352564	TYMS; NINL; PRKCZ; AMOT; GIMAP2; OSGIN1; ACE2; TTC8; BRCA1; UBD; JUNB; FOS; MYC; JUN; MAP3K8; KLF6; BCL3; IL4R; IER3; EMP1; IL1B; NFE2; S100A12; IL1RN; SYNE2; CDKN1A; MAP3K14; GPM6B; BAZ1A; S100A8; EIF5; TAGLN; MCAM; SOX17; FRMD6; MYH11; RPGR; LAMC2; CD44; CLDN1; HLA-DRA; MCL1; MXD1; PRKCE; RPS6KA5; TM4SF1; SPP1;
Embryonal carcinoma cells	29	1232	5	0.742811	0.966703	1	1	1	SLC29A1; EPHA1; HIST1H2BF; ELFN1; GOLM1; FADS2; GNAO1; ACBD5; EPHA2; SPRY4; SLC2A3; SDC4; MYADM; ATP2B4; GJA1; DHODH; PVR; GFPT2; MCAM; MYH11; RAC1; SLC7A1; FLNC; ABCD3; CD44; IFNGR1; MCL1; MME; TSPAN13;
ES2	75	3527	12.931	0.670899	0.999985	1	1	1	TYMS; GINS2; HMMR; BCAR3; PEG10; AKR1B10; C19orf25; ME1; HIST1H2BF; HIST1H2AC; TRHDE; AP1S1; ANXA13; GOLM1; DBI; C15orf52; JUN; CYR61; ADAMTS1; EPHA2; THBS1; NAMPT; P4HA1; PLAUR; FOSL1; SLC2A3; MAFF; RRS1; CDC42EP3; MYADM; TUBB6; SERPINE1; ATP2B4; IGFBP2; PPAN; RRP12; STC1; PVR; SYNE2; TGM2; LIF; TNFRSF12A; AKAP12; GFPT2; EIF5; MTHFD2; PTX3; SERPINA1; FRMD6; CD274; RAC1; SLC7A1; FJX1; ALDH1A3; SE…
Ovary	311	8592	53.6207	1.14189	0.000637942	0.540975	0.00743106	0.0256405	FMO1; TP53I3; TYMS; WNT5A; HMMR; ZWINT; BCAR3; RNF43; PEG10; ASPM; CKAP2; TBX10; GRIA3; PDP2; RTP3; GLT8D1; IFIT2; TRIM14; RMND1; FRAT1; ME1; SLC29A1; C9orf91; PALMD; SKP2; FRMD7; EEF1A2; CCL14; EPHA1; PCBP4; PTTG1; DBP; PAQR7; SIRT4; FAM13A; FAM168A; ABCC5; AGFG2; BTN3A1; TLR3; PDE11A; PMS2; PKIB; NINL; TMEM63A; CHRNB1; TBX3; AMOT; CNTNAP2; PRPF40B; PITPNM2; OSGIN1; MTMR4; GRAP; ACE2; HIST1H2AC;…
Liver cancer	300	7697	51.7241	1.22958	1.21676e-06	0.00103181	7.37008e-05	0.000254301	FMO1; TP53I3; TYMS; HMMR; ZWINT; BCAR3; RNF43; AKR1B10; ASPM; CKAP2; GRIA3; LGALS4; PDP2; NOL3; RTP3; GLT8D1; IFIT2; RMND1; ME1; MOGAT2; SLC29A1; C9orf91; PALMD; SKP2; FRMD7; CCL14; EPHA1; PTTG1; DBP; SAMD3; ONECUT1; SIRT4; AGFG2; BTN3A1; TLR3; PDE11A; PMS2; TNFSF10; PKIB; NINL; CHRNB1; SLC22A7; TBX3; PRKCZ; AMOT; CNTNAP2; PITPNM2; GIMAP2; AMACR; OSGIN1; CD3G; ACE2; TTC8; ANXA9; AFP; OAS1; RPL39L…
Dendritic cells	57	1954	9.82759	0.920384	0.769061	1	1	1	TP53I3; IFIT3; IFIT2; CX3CR1; TLR7; EEF1A2; FABP4; CXCL9; FREM2; GPNMB; DBI; GNAO1; ABHD8; BCL3; BCL6; NAMPT; IL6; IL1B; TUBB6; RAB27A; ATP2B4; IGFBP2; IL1RN; TNFSF14; NFKB2; SERPINB9; TGM2; TNFRSF10D; TNFAIP6; S100A8; EIF5; TAGLN; MTHFD2; PTX3; CD274; RAC1; CCL3; SERPINB2; CCL20; HLA-C; ANP32E; CCR1; CD44; CLEC7A; CTSS; ENO3; ERAP2; FABP5; FCER1G; FKBP5; HLA-DRA; ICAM1; MNDA; RBM3; S100A9; SRGN;…
OVCAR3	92	3714	15.8621	0.781514	0.99763	1	1	1	TP53I3; TYMS; GINS2; ZWINT; LRRC20; AKR1B10; IFIT3; NOL3; MAL2; ME1; PRSS3; UNC119; EPHA1; ONECUT1; FAM168A; HIST1H2BF; HIST1H2AC; ANXA9; TRHDE; UBE2T; UGT1A6; GPNMB; GOLM1; DBI; ACBD5; KANK4; DCDC2; DEFA1; CYR61; ADAMTS1; ELL; THBS1; NAMPT; P4HA1; ETNK1; PLAUR; S100P; ZFP36; SDC4; GPRC5A; RBPMS; RRS1; MYADM; TUBB6; CASP4; ATP2B4; IGFBP2; GJA1; DHODH; NBL1; PVR; TGM2; TNFRSF12A; AKAP12; S100A8; E…
Huh7	78	2976	13.4483	0.826914	0.975069	1	1	1	PEG10; CKAP2; IFIT3; EEF1A2; ONECUT1; CEBPA; MARVELD3; TNFSF10; NAGS; ZNF219; PRKCZ; AMOT; GIMAP2; PNPLA3; AFP; TRHDE; FCGBP; ABCC6; GCK; CASC5; KIF22; FOSL2; ADAMTS1; BCL3; SERTAD1; BCL6; NR4A1; NAMPT; ETNK1; PFKFB3; ZNF331; UPP1; MAFF; THBD; RRS1; NR4A3; MYADM; SERPINE1; PTGER2; HDC; RRP12; URB2; ADAM19; SYNE2; TGM2; TNFRSF10D; DUSP10; AKAP12; GFPT2; GRHL1; EIF5; ADAMTS4; MTHFD2; MYH11; CD274; …
Serum	205	7685	35.3448	0.841541	0.999625	1	1	1	TP53I3; TYMS; WNT5A; CCDC121; HMMR; ZWINT; LRRC20; ASPM; CKAP2; KRT222; FBXO27; RTP3; C19orf25; ME1; CX3CR1; PRSS3; TLR7; SKP2; EEF1A2; CCL14; PCBP4; SLC7A6OS; KBTBD3; ANKRD29; SLC12A1; RALGPS1; FAM13A; SPC25; TLR3; LRRN3; PDE11A; PMS2; C2orf54; PKIB; NINL; HIST1H2BF; TMEM63A; AMOT; CNTNAP2; AMACR; FABP4; MTMR4; CENPQ; GRAP; CRYAA; HIST1H2AC; LRRC31; BRCA1; PCDH18; CXCL9; ZNF385B; ORAI3; PIGR; TR…
Lens	19	1037	3.27586	0.578288	0.997537	1	1	1	TP53I3; LRRC20; AKR1B10; IFIT3; IFIT2; CRYAA; CA12; NAMPT; TUBB6; SERPINB9; TGM2; EIF5; RAC1; HLA-C; ANP32E; CTSS; FABP5; FKBP5; HLA-DRA;
Breast	243	6413	41.8966	1.19538	0.000302993	0.256938	0.00414416	0.0142992	FMO1; TP53I3; TYMS; ZWINT; BCAR3; RNF43; CKAP2; GRIA3; PDP2; NOL3; RTP3; GLT8D1; RMND1; MOGAT2; SLC29A1; C9orf91; PALMD; SKP2; FRMD7; CCL14; EPHA1; PTTG1; SAMD3; SIRT4; AGFG2; TLR3; PDE11A; PMS2; TNFSF10; PKIB; NINL; CHRNB1; TBX3; PRKCZ; AMOT; PITPNM2; OSGIN1; FABP4; ACE2; TTC8; ANXA9; AFP; OAS1; RPL39L; TMEM45B; BRCA1; PCDH18; MAMDC4; ORAI3; PIGR; HTR2B; FREM2; ANXA13; GCK; ABCG8; RET; TCAP; NCA…
Hair	16	817	2.75862	0.618171	0.987856	1	1	1	ME1; EDAR; FABP4; GPNMB; DBI; TUBB6; ATP2B4; GJA1; EIF5; RAC1; EFHD1; ABCD3; FABP5; RBM3; SCD; CHAC1;
H520	21	843	3.62069	0.786209	0.898337	1	1	1	WNT5A; ME1; FREM2; GOLM1; DBI; THBS1; NAMPT; TUBB6; IGFBP2; ADAM19; PVR; EIF5; PTX3; VCAN; HLA-C; CD44; ENPP2; FABP5; RBM3; SGCE; SPP1;
Nipple aspirate fluid	44	754	7.58621	1.84128	7.56519e-05	0.0641528	0.00128306	0.00442712	EEF1A2; BTN3A1; HIST1H2BF; ACE2; HIST1H2AC; PIGR; FCGBP; GGT1; GPNMB; GOLM1; PROL1; DBI; ACSM1; DEFA1; THBS1; PLAUR; S100P; SDC4; IL1RL1; S100A12; IGFBP2; NBL1; STC1; TGM2; CHI3L1; S100A8; SERPINA1; RAC1; LAMC2; SEMA4B; HLA-C; CD44; COL1A1; COL1A2; DEFA1B; DEFA3; HLA-DRA; ICAM1; MT1M; S100A9; TM4SF1; NCAM2; SPP1; SHBG;
Uterus	43	917	7.41379	1.47959	0.00678543	1	0.0518383	0.178865	APOL3; TBX10; PAQR7; TBX3; GIMAP2; AMACR; OSGIN1; MTMR4; BRCA1; HTR2B; RET; RBP5; GOLM1; CA12; USP18; CHST9; COL5A3; DCDC2; GADD45B; AGPAT9; FAM107A; IER3; SPRY4; PFKFB3; GPRC5A; PROK2; PTGER2; SLC22A4; NCOA7; URB2; TGFB3; SYNE2; AVPR1A; TAGLN; SERPINA1; VCAN; MTUS1; RCAN1; GFRA3; CTSS; F2RL1; LGALS8; SHBG;
T24	9	123	1.55172	2.31062	0.016425	1	0.108816	0.375463	AFP; CYR61; IL6; SDC4; SERPINE1; TAGLN; PTX3; CD44; SRGN;
CPE_SCX_fractionated	32	2331	5.51724	0.433198	1	1	1	1	TP53I3; AKR1B10; NOL3; FBXO2; EPHA1; AMACR; KCNK1; NAMPT; P4HA1; UPP1; TUBB6; ATP2B4; RRP12; URB2; SERPINB9; CDKN1A; BAZ1A; S100A8; EIF5; MTHFD2; ALDH1A3; SERPINB2; LAMC2; HLA-C; ANP32E; CASP7; DDX21; ERAP2; FABP5; FKBP5; IRF2BPL; MME;
CRC	127	4247	21.8966	0.943407	0.790852	1	1	1	TP53I3; TYMS; LRRC20; AKR1B10; CKAP2; KRT222; LGALS4; NOL3; MAL2; ME1; PRSS3; EEF1A2; EPHA1; RALGPS1; FAM13A; ANKS4B; HIST1H2BF; ACE2; HIST1H2AC; AFP; PIGR; FREM2; FCGBP; AP1S1; ABCC6; ANXA13; CASC5; SPHK2; UGT1A6; GOLM1; CA12; MB; DBI; GNAO1; STMN2; TRPM8; CYR61; ADAMTS1; THBS1; NAMPT; P4HA1; PLAUR; S100P; IL6; SLC2A3; SDC4; UPP1; IGFBP1; CREB5; RRS1; LARP1B; TUBB6; SERPINE1; MT1A; ACTG2; IGFBP2…
Preadipocytes	38	510	6.55172	2.35106	1.04202e-06	0.000883629	6.79715e-05	0.000234532	AKR1B10; ME1; FABP4; AFP; GPNMB; DBI; COL5A3; PHLDA1; CCL2; THBS1; NAMPT; P4HA1; IL6; SLC2A3; IL1RL1; IGFBP1; TNFRSF1A; IL1B; SERPINE1; IGFBP2; IL10; IL1RN; MMP19; LIF; ANGPTL4; AKAP12; TNFAIP6; S100A8; OSM; CCL3; VCAN; FLNC; SAA1; COL1A1; COL1A2; FABP5; ICAM1; S100A9;
Fetal hepatocytes	124	3784	21.3793	1.03383	0.352692	1	0.868299	1	AKR1B10; GRIA3; IFIT3; NOL3; IFIT2; ME1; C9orf91; RTP4; FRMD7; EEF1A2; DBP; SLC12A1; CEBPA; RALGPS1; ABCC5; SPATA18; TNFSF10; AMOT; MTMR4; LRRC31; AFP; BRCA1; ZNF385B; FCGBP; ABCC6; GCK; CASC5; SPHK2; OAS2; HNF4A; GPNMB; GOLM1; CA12; KIF22; USP18; AGPAT9; CYR61; ADAMTS1; KLF11; BCL3; THBS1; SIK1; SLITRK3; IER3; BCL6; BACH2; NR4A1; NAMPT; ETNK1; VNN3; CRISPLD2; IL1RL1; TRIM15; IVNS1ABP; IRAK3; RBP…
Amniotic fluid	39	566	6.72414	2.17418	5.00457e-06	0.00424387	0.00014634	0.00050494	PRSS3; HIST1H2BF; CDH15; ACE2; AFP; PIGR; FCGBP; GGT1; ANXA13; GOLM1; DBI; COL5A3; DEFA1; ADAMTS1; THBS1; IL1RL1; IGFBP1; SERPINE1; IGFBP2; MMP19; PVR; TGM2; S100A8; TAGLN; SERPINA1; VCAN; SERPINB2; LAMC2; COL1A1; COL1A2; DEFA1B; DEFA3; ENPP2; ICAM1; MME; S100A9; SELL; SPP1; SHBG;
Vulva/anal skin	240	6377	41.3793	1.18729	0.000534182	0.452987	0.00647124	0.0223287	FMO1; TP53I3; TYMS; HMMR; ZWINT; RNF43; AKR1B10; ASPM; CKAP2; GRIA3; CYP7A1; LGALS4; PDP2; NOL3; RTP3; GLT8D1; RMND1; MOGAT2; SLC29A1; C9orf91; PALMD; SKP2; FRMD7; CCL14; EPHA1; DBP; SAMD3; SIRT4; AGFG2; TLR3; PDE11A; PMS2; PKIB; NINL; CHRNB1; SLC22A7; TBX3; PRKCZ; PITPNM2; OSGIN1; TTC8; ANXA9; AFP; OAS1; RPL39L; BRCA1; PCDH18; MAMDC4; ORAI3; PIGR; HTR2B; FREM2; SLC22A11; ANXA13; GCK; CASC5; ABCG…
	33	1183	5.68966	0.880241	0.802925	1	1	1	C11orf52; EEF1A2; KDELR3; EPHA1; SPTLC3; FABP4; AP1S1; EPHA2; S100P; UPP1; IGFBP1; IRAK3; ATP2B4; SERPINB9; TGM2; S100A8; TAGLN; SERPINA1; MYH11; RAC1; EFHD1; PAPPA; SERPINB2; ABCD3; COL1A1; FABP5; HPGD; ICAM1; LGALS8; RBM3; RPS6KA5; S100A9; TJP2;
HH4	95	2684	16.3793	1.11668	0.131263	1	0.441711	1	BCAR3; CYP7A1; GLT8D1; PRSS3; C9orf91; EEF1A2; RALGPS1; MARVELD3; EDAR; NINL; ZMAT3; PRKCZ; CNTNAP2; PNPLA3; LRRC31; TRHDE; FREM2; FCGBP; ABCC6; GCK; CASC5; CA12; ADAMTS1; CCL2; ELL; THBS1; RALGDS; SPRY4; ZC3H12A; BACH2; NAMPT; ETS2; P4HA1; CISH; SLC2A3; UPP1; IGFBP1; TRIM15; THBD; HAS2; IVNS1ABP; IRAK3; RRS1; PIM3; LYST; NR4A3; MIDN; ATP2B4; IGFBP2; PPAN; ZNF878; RRP12; NFKBIZ; CDH23; STC1; PVR;…
Ramos	31	1566	5.34483	0.624672	0.998905	1	1	1	HMMR; APOL3; CKAP2; EEF1A2; UNC119; FADS1; AP1S1; FADS2; GADD45B; ELL; P4HA1; IVNS1ABP; URB2; SERPINB9; SYNE2; S100A8; BIRC3; DHRS13; HLA-C; ABCD3; ALOX5AP; ANP32E; ARAP2; DEPTOR; FABP5; ICAM1; RBM3; RPS6KA5; S100A9; TJP2; RFC1;
Leukocytes	102	2845	17.5862	1.13111	0.095223	1	0.369405	1	CKAP2; TRIM14; CX3CR1; SKP2; PTTG1; FAM168A; ABCC5; BTN3A1; PMS2; PKIB; ZMAT3; GIMAP2; GRAP; BRCA1; USP18; DBI; DEFA1; GADD45B; JUNB; SOCS3; PIM1; PPRC1; NFIL3; CCL2; ELL; SERTAD1; THBS1; IER3; RALGDS; BACH2; FOXO1; NAMPT; ETNK1; EGR1; S100P; CISH; PADI4; IRAK3; RBPMS; PROK2; CLCF1; PIM3; NFE2; MYADM; RAB27A; CASP4; MT1A; S100A12; C2CD4B; SLC11A1; PTGER2; HDC; PPAN; TNFSF14; IL18RAP; LPAR1; ADAM1…
Renal cancer	281	7121	48.4483	1.24487	1.36023e-06	0.00115348	7.49179e-05	0.000258501	FMO1; TP53I3; TYMS; ZWINT; BCAR3; RNF43; AKR1B10; ASPM; CKAP2; GRIA3; CYP7A1; PDP2; NOL3; RTP3; GLT8D1; RMND1; ME1; MOGAT2; SLC29A1; P2RY2; C9orf91; PALMD; SKP2; FRMD7; CCL14; EPHA1; PTTG1; DBP; SAMD3; SIRT4; AGFG2; BTN3A1; TLR3; PDE11A; PMS2; PKIB; NINL; CHRNB1; SLC22A7; TBX3; PRKCZ; AMOT; CNTNAP2; PITPNM2; GIMAP2; AMACR; CD3G; FABP4; ACE2; ANXA9; AFP; OAS1; RPL39L; TMEM45B; BRCA1; PCDH18; MAMDC…
Aorta	24	530	4.13793	1.42907	0.051567	1	0.252768	0.872162	GIMAP2; OSGIN1; RBP5; UBD; GOLM1; USP18; CHST9; RGS2; THBS1; IER3; KLF5; PROK2; HDC; SYNE2; ANGPTL4; TAGLN; SERPINA1; CNN1; SERPINB2; FLNC; RCAN1; GFRA3; RGCC; SPP1;
Thyroid	39	889	6.72414	1.38425	0.0254323	1	0.154047	0.531531	TYMS; NINL; PRKCZ; AMOT; ACE2; TTC8; TCAP; JUNB; FOS; JUN; ATF3; MAP3K8; IL4R; BCL6; PTGS2; NFE2; C5AR1; SYNE2; CDKN1A; MAP3K14; GPM6B; BAZ1A; EIF5; CSF3; FRMD6; LAMC2; CD44; CLDN1; CTSS; ENO3; HLA-DRA; ICAM1; MCL1; MXD1; RPS6KA5; SELL; TM4SF1; SCUBE1; SPP1;
hupo46_reference_cam	18	1042	3.10345	0.545238	0.998881	1	1	1	FBXO2; RMND1; SLC29A1; FADS2; GNAO1; ACBD5; THBS1; MYADM; ATP2B4; TAGLN; SERPINA1; RAC1; VCAN; SAA1; ABCD3; LGALS8; SCD; SHBG;
Substantia nigra	40	1146	6.89655	1.10135	0.284685	1	0.74053	1	PEG10; DDO; NINL; CNTNAP2; PITPNM2; GIMAP2; ACE2; PCDH18; RBP5; GOLM1; USP18; ACBD5; CHST9; CYR61; ITPRIP; IER3; NR4A1; FGF14; GPRC5A; PROK2; NR4A2; RASL10A; RND1; CALCA; CDH23; SYNE2; GFPT2; XKR4; SBNO2; NRG1; MTUS1; SEMA4B; RCAN1; GFRA3; ARNTL2; IRF2BPL; KLHL29; GRID1; HYDIN; NCAM2;
Vagina	200	5307	34.4828	1.1889	0.00207001	1	0.018875	0.0651271	FMO1; TP53I3; HMMR; ZWINT; RNF43; AKR1B10; ASPM; CKAP2; PDP2; NOL3; RTP3; RMND1; ME1; MOGAT2; SLC29A1; P2RY2; C9orf91; PALMD; SKP2; CCL14; EPHA1; PTTG1; SAMD3; AGFG2; PDE11A; PMS2; PKIB; NINL; CHRNB1; SLC22A7; PRKCZ; PITPNM2; ANXA9; AFP; OAS1; RPL39L; BRCA1; PCDH18; ORAI3; HTR2B; FREM2; ANXA13; CASC5; ABCG8; RET; NCAPG2; OAS2; HNF4A; GOLM1; LRIG3; FADS2; CA12; DBI; GNAO1; IFI6; ICA1; ACBD5; CHST9…
Monocytes	59	745	10.1724	2.49867	8.86229e-11	7.51522e-08	7.51522e-08	2.59309e-07	CX3CR1; P2RY2; UNC119; TLR3; ACE2; CXCL9; GGT1; PNRC1; RGS1; RGS2; THBS1; IL4R; IER3; PTGS2; PLAUR; IL6; VNN3; ZFP36; IL1RL1; MYADM; SERPINE1; S100A12; C2CD4B; SLC11A1; PTGER2; IL10; IL1RN; HDC; FCAR; FPR2; SERPINB9; CHI3L1; S100A8; PTX3; SERPINA1; CSF3; MYH11; RAC1; CCL3; C2CD4A; SERPINB2; IL24; CCL20; ALOX5AP; CCR1; CD44; CLEC7A; CSF2RB; CXCR2; FCER1G; HLA-DRA; IFNGR1; LECT2; MCL1; MNDA; S100A9…
MDA-MB-468	12	770	2.06897	0.49203	0.998519	1	1	1	HIST1H2AC; MB; DBI; NAMPT; SYNE2; RAC1; ALDH1A3; EFHD1; ABCD3; CD44; DDX21; S100A9;
Platelets	47	2168	8.10345	0.684028	0.998811	1	1	1	PRSS3; EEF1A2; SIRT4; ABCC5; ZNF219; BRCA1; AP1S1; CASC5; DBI; BCL3; THBS1; PTGS2; SLC2A3; TUBB6; RAB27A; SERPINE1; ACTG2; HDC; FCAR; STC1; SERPINB9; GFPT2; GEM; S100A8; EIF5; SERPINA1; BIRC3; MYH11; RAC1; FLNC; SEMA4B; GFRA3; HLA-C; CCDC71L; CCR1; DEFA3; ENO3; FABP5; FAM20A; FCER1G; FKBP5; HS3ST3B1; ICAM1; RGCC; S100A9; SRGN; TJP2;
HL60	32	545	5.51724	1.85279	0.000643148	0.54539	0.00743106	0.0256405	SLC29A1; ABCC5; ORAI3; GGT1; DEFA1; THBS1; PLAUR; EMP1; TNFRSF1A; MYADM; TUBB6; RAB27A; ATP2B4; ACTG2; PTGER2; FCAR; PVR; VNN2; S100A8; SLC7A1; SEMA4B; HLA-C; ALOX5AP; CCR1; CD44; CTSS; CXCR2; DEFA1B; ENO3; ICAM1; IFNGR1; S100A9;
TOV21G	28	904	4.82759	0.977427	0.578779	1	1	1	HIST1H2BF; HIST1H2AC; GOLM1; DBI; CYR61; THBS1; P4HA1; IL6; SDC4; IGFBP2; MMP19; PVR; TGM2; TNFRSF12A; SERPINA1; VCAN; LAMC2; ANP32E; CD44; COL1A1; COL1A2; DDX21; FABP5; ICAM1; RBM3; SRGN; TJP2; SPP1;
Oral mucosa	216	5861	37.2414	1.16264	0.00392338	1	0.0323012	0.111454	FMO1; TP53I3; TYMS; HMMR; ZWINT; AKR1B10; ASPM; CKAP2; PDP2; NOL3; RTP3; GLT8D1; RMND1; ME1; MOGAT2; SLC29A1; P2RY2; C9orf91; PALMD; SKP2; CCL14; EPHA1; PTTG1; SAMD3; SIRT4; AGFG2; TLR3; PDE11A; PMS2; TNFSF10; PKIB; NINL; CHRNB1; SLC22A7; PRKCZ; AMOT; PITPNM2; TTC8; ANXA9; AFP; OAS1; RPL39L; BRCA1; PCDH18; MAMDC4; ORAI3; PIGR; HTR2B; UBE2T; FREM2; ANXA13; GCK; CASC5; ABCG8; RET; UGT1A6; NCAPG2; O…
Esophagus	226	6034	38.9655	1.18159	0.00119643	1	0.0130074	0.0448812	FMO1; TP53I3; TYMS; ZWINT; RNF43; AKR1B10; ASPM; CKAP2; PDP2; NOL3; RTP3; GLT8D1; RMND1; ME1; MOGAT2; SLC29A1; P2RY2; C9orf91; PALMD; SKP2; CCL14; EPHA1; PTTG1; SAMD3; SIRT4; AGFG2; PDE11A; PMS2; PKIB; NINL; CHRNB1; SLC22A7; PRKCZ; PITPNM2; OSGIN1; TTC8; ANXA9; AFP; OAS1; RPL39L; TMEM45B; PCDH18; MAMDC4; ORAI3; HTR2B; FREM2; ANXA13; GCK; CASC5; ABCG8; RET; UGT1A6; NCAPG2; OAS2; HNF4A; GOLM1; LRIG…
Corpus callosum	25	988	4.31034	0.798541	0.901871	1	1	1	PEG10; NINL; CNTNAP2; GIMAP2; OSGIN1; PCDH18; ACBD5; CYR61; ITPRIP; FGF14; RASL10A; RND1; CDH23; SYNE2; GFPT2; XKR4; SBNO2; MTUS1; SEMA4B; IRF2BPL; KLHL29; ZBTB21; GRID1; HYDIN; NCAM2;
NB4	31	711	5.34483	1.37585	0.0459875	1	0.233518	0.805741	SLC29A1; ABCC5; OAS1; GGT1; GOLM1; THBS1; P4HA1; PLAUR; TNFRSF1A; THBD; C5AR1; MYADM; TUBB6; GJA1; FCAR; PVR; TGM2; SLC7A2; ANGPTL4; MCAM; SLC7A1; SEMA4B; HLA-C; CCR1; CD44; DDX21; ENO3; ICAM1; IFNGR1; SELL; TREM1;
Mammary gland	45	760	7.75862	1.86825	4.44585e-05	0.0377008	0.000856836	0.00295647	HMMR; APOL3; ABCC5; PDE11A; TNFSF10; TBX3; GIMAP2; AMACR; OSGIN1; ACE2; BRCA1; PIGR; SLC16A13; GGT1; RBP5; GOLM1; FADS2; CA12; USP18; CHST9; COL5A3; IER3; PFKFB3; UPP1; TNFRSF1A; PROK2; NCOA7; MMP19; SYNE2; LIF; CDKN1A; SERPINA1; MCAM; ALDH1A3; NRG1; IL24; LAMC2; SAA1; RCAN1; GFRA3; CD44; LGALS8; S100A9; UGT1A1; UGT1A9;
19_proteinag	3	98	0.517241	0.968815	0.604732	1	1	1	THBS1; SERPINA1; SAA1;
Sertoli cells	4	29	0.689655	4.36055	0.0126517	1	0.0916977	0.316398	AMACR; DBI; ICA1; SERPINB9;
031003_BALF2	34	1102	5.86207	0.973567	0.591353	1	1	1	AKR1B10; IFIT3; NOL3; IFIT2; FBXO2; ME1; AFP; PIGR; GOLM1; THBS1; NAMPT; S100P; CASP4; TGM2; RASD1; S100A8; EIF5; TAGLN; PTX3; SERPINA1; MCAM; FLNC; VIL1; SAA1; ANP32E; CD44; COL1A1; COL1A2; FABP5; FKBP5; IRF2BPL; MNDA; SELL; SPP1;
Tears	17	510	2.93103	1.05213	0.451008	1	1	1	TP53I3; PIGR; GOLM1; PROL1; DBI; LRRC19; THBS1; S100P; IL1RN; TGM2; S100A8; SERPINA1; ALDH1A3; SERPINB2; FABP5; MNDA; S100A9;
Cellzome_Abl_inhibitors_NatureBiotechnology_exp144	1	186	0.172414	0.171289	0.997576	1	1	1	SYNE2;
CaOV3	77	3355	13.2759	0.724099	0.999632	1	1	1	TP53I3; TYMS; PEG10; AKR1B10; IFIT3; NOL3; FBXO2; ME1; RTP4; EEF1A2; HIST1H2BF; HIST1H2AC; TRHDE; AP1S1; GPNMB; GOLM1; FADS2; DBI; ACBD5; DCDC2; JUNB; CYR61; THBS1; NAMPT; P4HA1; PLAUR; IL6; SLC2A3; SDC4; GPRC5A; MYADM; FYTTD1; TUBB6; CASP4; ATP2B4; IGFBP2; PPAN; RRP12; CDH23; STC1; PVR; TGM2; TNFRSF12A; CDKN1A; ANGPTL4; AKAP12; EIF5; MTHFD2; SERPINA1; MYH11; RAC1; EFHD1; FLNC; LAMC2; SEMA4B; SAA…
Cerebrospinal fluid	46	1059	7.93103	1.37056	0.0188461	1	0.121741	0.42006	RAB26; PRSS3; CDH15; CNTNAP2; AMACR; FABP4; CXCL9; PIGR; TRHDE; FCGBP; SPHK2; GOLM1; MB; SYT7; ADAMTS1; HBEGF; THBS1; SERPINE1; ACTG2; IGFBP2; NBL1; SERPINB9; CHI3L1; S100A8; ADAMTS4; TAGLN; SERPINA1; MCAM; VCAN; SORCS1; SEMA4B; SAA1; CD44; COL1A1; COL1A2; CTSS; ENO3; ENPP2; FABP5; HAMP; RNF125; S100A9; SGCE; NCAM2; SPP1; SHBG;
Melanoma	31	1826	5.34483	0.535727	0.999985	1	1	1	AKR1B10; NOL3; ME1; FABP4; GPNMB; DBI; THBS1; NAMPT; CREB5; MYADM; RAB27A; ERN1; SERPINB9; AKAP12; S100A8; EIF5; TAGLN; SERPINA1; CNN1; MYH11; RAC1; EFHD1; VCAN; SERPINB2; CD44; COL1A1; COL1A2; FABP5; HLA-DRA; RBM3; S100A9;
hupo1_b1-hep_cam	2	80	0.344828	0.792495	0.725622	1	1	1	SERPINA1; S100A9;
Subthalamic nucleus	24	882	4.13793	0.858743	0.808537	1	1	1	PEG10; NINL; CNTNAP2; PCDH18; USP18; ACBD5; CYR61; ITPRIP; IER3; RASL10A; RND1; CDH23; SYNE2; GFPT2; XKR4; SBNO2; MTUS1; SEMA4B; GFRA3; IRF2BPL; KLHL29; GRID1; HYDIN; NCAM2;
Melanocytes	2	71	0.344828	0.892938	0.662945	1	1	1	RAB27A; IL24;
Dentin	9	246	1.55172	1.15536	0.378585	1	0.904338	1	THBS1; PTX3; SERPINA1; VCAN; HLA-C; COL1A1; COL1A2; MCL1; SPP1;
J82	6	216	1.03448	0.877698	0.684753	1	1	1	DBI; SERPINE1; TAGLN; CD44; FABP5; RBM3;
15_clinprot_c3	9	749	1.55172	0.379474	0.999881	1	1	1	TUBB6; EIF5; MTHFD2; SERPINA1; SAA1; ANP32E; ENO3; HLA-DRA; RBM3;
Ubiquitous	28	1052	4.82759	0.83992	0.856411	1	1	1	FRAT1; RALGPS1; ZNF219; PRKCZ; ACE2; GGT1; MYC; JUN; AGPAT9; FAM107A; PHLDA1; NFIL3; KLF11; PFKFB3; RAB27A; PPAN; ERN1; NFKB2; TGM2; RAC1; RPGR; DUSP6; ERAP2; LGALS8; OSGIN2; SGMS2; STK17A; RFC1;
Cortex	13	683	2.24138	0.60089	0.984852	1	1	1	ME1; EEF1A2; CNTNAP2; DBI; GNAO1; ATP2B4; AKAP12; GPM6B; SERPINA1; RAC1; VCAN; COL1A2; PRKCE;
N06cs122	6	123	1.03448	1.54127	0.195972	1	0.579038	1	DEFA1; GPRC5A; GJA1; TGM2; DEFA1B; FCER1G;
17_wcx	20	1438	3.44828	0.438965	0.999997	1	1	1	EEF1A2; PCBP4; PMS2; TBX3; DEFA1; NAMPT; RRS1; ATP2B4; IGFBP2; PPAN; MTHFD2; SERPINA1; SAA1; ANP32E; DDX21; DEFA1B; FKBP5; HLA-DRA; IRF2BPL; MME;
hupo1_b2-edta_cam	10	316	1.72414	0.999259	0.547329	1	1	1	PIGR; FCGBP; SERPINA1; MAPK4; SAA1; CD44; DDX21; ICAM1; SELL; SHBG;
H23	28	896	4.82759	0.986154	0.559419	1	1	1	EEF1A2; HIST1H2BF; FREM2; GOLM1; DBI; CYR61; CCL2; THBS1; NAMPT; PLAUR; SDC4; TNFRSF1A; TUBB6; IGFBP2; STC1; PVR; TGM2; ANGPTL4; AKAP12; PTX3; MCAM; SEMA4B; HLA-C; ANP32E; CD44; DDX21; FABP5; ICAM1;
YTS	41	1888	7.06897	0.68522	0.997526	1	1	1	HMMR; APOL3; GLT8D1; TRIM14; SLC29A1; C9orf91; AGFG2; TMEM63A; FADS1; AP1S1; CASC5; RNF214; NCAPG2; OAS2; FADS2; ACBD5; ITPRIP; P4HA1; ETNK1; SLC2A3; RRS1; RAB27A; ATP2B4; RRP12; SERPINB9; SLC7A2; RAC1; SLC7A1; CIT; DHRS13; HLA-C; ABCD3; ALOX5AP; DDX21; FKBP5; HLA-DRA; ICAM1; LGALS8; SCD; SQLE; RFC1;
hupo1_b2-hep_cam	15	848	2.58621	0.558373	0.99627	1	1	1	RMND1; SLC29A1; CD3G; FADS2; MYADM; RAB27A; ATP2B4; PVR; SYNE2; SERPINA1; RAC1; SLC7A1; ABCD3; S100A9; SCD;
Ileum	10	201	1.72414	1.57095	0.107215	1	0.393587	1	MOGAT2; PRPF40B; GIMAP2; OSGIN1; ACE2; SYNE2; UGT1A3; UGT1A1; UGT1A8; MEP1B;
Embryonic stem cells	69	3047	11.8966	0.714468	0.999528	1	1	1	ZWINT; GLT8D1; SLC29A1; EPHA1; HIST1H2BF; TMEM63A; PAQR4; FADS1; HIST1H2AC; PCDH18; TMEM98; PIGR; GGT1; GOLM1; FADS2; GNAO1; ACBD5; AGPAT9; EPHA2; ITPRIP; THBS1; SPRY4; NAMPT; P4HA1; SLC2A3; SDC4; UPP1; RRS1; MYADM; FYTTD1; TUBB6; ATP2B4; GJA1; PPAN; ERN1; RRP12; URB2; DHODH; NFKB2; SERPINB9; PVR; SYNE2; TGM2; TNFRSF12A; AKAP12; GFPT2; GPM6B; TAGLN; MTHFD2; MCAM; MYH11; RAC1; SLC7A1; DHRS13; FLNC…
Saliva	32	912	5.51724	1.10721	0.300649	1	0.767923	1	AKR1B10; ASPM; EEF1A2; TNFSF10; TBX3; FABP4; CRYAA; PIGR; FCGBP; GOLM1; DBI; DEFA1; THBS1; S100P; SDC4; GPRC5A; ACTG2; S100A12; IL1RN; S100A8; SERPINA1; TMPRSS2; SAA1; ANP32E; CD44; DEFA1B; DEFA3; ENO3; FABP5; FAM20A; HLA-DRA; S100A9;
Nuclear	14	1319	2.41379	0.335069	1	1	1	1	EEF1A2; PMS2; GOLM1; ADAMTS1; NAMPT; P4HA1; RRP12; URB2; EIF5; MTHFD2; ANP32E; DDX21; FKBP5; IRF2BPL;
N06CS98-2	11	165	1.89655	2.10485	0.0162244	1	0.108816	0.375463	C11orf52; DBI; DEFA1; SDC4; GPRC5A; GJA1; TGM2; LAMC2; DEFA1B; FCER1G; TJP2;
MV4-11	3	382	0.517241	0.248563	0.999623	1	1	1	IRAK3; ERN1; RPS6KA5;
Caudate nucleus	40	1204	6.89655	1.04829	0.401728	1	0.943671	1	PEG10; DDO; RAB26; NINL; CNTNAP2; ACE2; PCDH18; GCK; RBP5; GOLM1; USP18; ACBD5; CHST9; DCDC2; CYR61; ITPRIP; IER3; NR4A1; FGF14; PROK2; RASL10A; RND1; CDH23; SYNE2; GFPT2; XKR4; SBNO2; MTUS1; SEMA4B; RCAN1; GFRA3; AMD1; ARNTL2; GPR88; IRF2BPL; KLHL29; ZBTB21; GRID1; HYDIN; NCAM2;
Retina	19	364	3.27586	1.64745	0.0236646	1	0.146479	0.505418	UNC119; FADS1; ABCC6; CCL2; RGS1; FGF14; PTGER2; IGFBP2; IL1RN; CDH23; RGS16; ROM1; RPGR; ABLIM1; ICAM1; IFNGR1; LGALS8; MXD1; SCD;
Medulla oblongata	22	473	3.7931	1.46789	0.0477968	1	0.239807	0.827442	CNTNAP2; GIMAP2; OSGIN1; ACE2; RBP5; GOLM1; USP18; CHST9; CYR61; IER3; NR4A1; FGF14; PROK2; RND1; SYNE2; GFPT2; SLCO1A2; RCAN1; GFRA3; ALOX5AP; ARNTL2; GPR88;
Bladder cancer cells	16	369	2.75862	1.36867	0.128665	1	0.434693	1	HIST1H2BF; EPHA2; THBS1; NAMPT; GPRC5A; ATP2B4; S100A8; MYH11; RAC1; FLNC; LAMC2; HLA-C; CD44; ICAM1; MME; S100A9;
PC3(AR)6	15	262	2.58621	1.80721	0.0203355	1	0.129492	0.446807	AMOT; GOLM1; CYR61; THBS1; IL6; SDC4; IGFBP2; S100A8; PTX3; SERPINA1; LAMC2; CD44; FABP5; ICAM1; S100A9;
Neutrophils	34	393	5.86207	2.72991	1.28098e-07	0.000108627	2.17254e-05	7.49625e-05	CX3CR1; AMOT; CXCL9; DEFA1; NAMPT; S100P; ZFP36; SLC2A3; PADI4; C5AR1; FPR1; RAB27A; S100A12; SLC11A1; IL1RN; FCAR; FPR2; VNN2; TNFRSF10D; CHI3L1; MMP25; S100A8; SERPINA1; VCAN; ALOX5AP; CSF2RB; CXCR2; DEFA3; F2RL1; ICAM1; MME; S100A9; SELL; TREM1;
Parathyroid	36	782	6.2069	1.45263	0.0163502	1	0.108816	0.375463	TYMS; TNFSF10; PRKCZ; AMOT; TTC8; RET; FOS; MYC; JUN; ATF3; MAP3K8; IL4R; IER3; PTGS2; NFE2; C5AR1; MAP3K14; GPM6B; BAZ1A; EIF5; MCAM; FRMD6; RAC1; NRG1; LAMC2; HLA-C; CLDN1; ENO3; HLA-DRA; LECT2; MXD1; RPS6KA5; SELL; TM4SF1; SCUBE1; SPP1;
HEK293	75	4439	12.931	0.533062	1	1	1	1	TYMS; HMMR; PEG10; CKAP2; C19orf25; ME1; SLC29A1; EEF1A2; UNC119; SPC25; ZMAT3; PRKCZ; AMOT; BRCA1; RNF214; NCAPG2; GOLM1; FADS2; KIF22; DBI; ADAMTS1; EPHA2; KCNK1; NAMPT; P4HA1; ETNK1; SIPA1L2; UPP1; GPRC5A; RBPMS; CREB5; RRS1; TUBB6; ATP2B4; IGFBP2; PPAN; RRP12; URB2; DHODH; SERPINB9; PVR; SYNE2; SLC7A2; AKAP12; BAZ1A; EIF5; TAGLN; MTHFD2; MCAM; RAC1; PDLIM3; EFHD1; IRS2; MTUS1; DHRS13; FLNC; D…
A549	19	997	3.27586	0.601488	0.995292	1	1	1	AKR1B10; PDP2; ME1; UNC119; CASC5; DBI; CEBPD; SERTAD1; SLC11A1; TGM2; TAGLN; MTHFD2; LAMC2; ABCD3; FABP5; RBM3; SCD; TJP2; WNK3;
Semen	38	966	6.55172	1.24125	0.0997963	1	0.372807	1	TP53I3; SPATA18; TNFSF10; CNTNAP2; ACE2; PIGR; FCGBP; GGT1; GOLM1; DBI; GNAO1; SYT7; DEFA1; ADAMTS1; THBS1; IL6; CRISPLD2; SLC2A3; IL1RL1; IGFBP1; RAB27A; IGFBP2; NBL1; TGFB3; S100A8; SERPINA1; TMPRSS2; RAC1; PAPPA; SEMA4B; CD44; DEFA1B; FABP5; MME; S100A9; TSPAN8; NCAM2; GSTT1;
Temporal cortex	2	51	0.344828	1.24304	0.483888	1	1	1	CYR61; AMD1;
Keratinocytes	27	250	4.65517	3.4081	2.9748e-08	2.52263e-05	8.40876e-06	2.9014e-05	P2RY2; CXCL9; HBEGF; IER3; FOSL1; CISH; KLF5; ELF3; IL1RN; IL18RAP; SLC7A2; S100A8; SERPINB2; LAMC2; CCL20; CD44; CLDN1; CTSS; F2RL1; FABP5; HLA-DRA; MME; RIPK4; S100A9; SCD; TM4SF1; TSLP;
Fetus	126	2992	21.7241	1.32858	0.000361511	0.306561	0.00464486	0.0160269	FMO1; BCAR3; RNF43; APOL3; PEG10; ASPM; TBX10; GRIA3; RAB26; P2RY2; UNC119; DBP; SIRT4; ABCC5; SPC25; BTN3A1; PDE11A; NINL; NAGS; TBX3; AMOT; PRPF40B; PITPNM2; GIMAP2; OSGIN1; CD3G; MTMR4; TTC8; AFP; BRCA1; PCDH18; NOL4; GGT1; CASC5; RBP5; UBD; GOLM1; USP18; SYT7; ACBD5; CHST9; DCDC2; JUNB; SOCS3; CEBPD; PIM1; ADAMTS1; NFIL3; KLF11; ITPRIP; CDH19; RGS2; SLITRK3; IER3; SPRY4; BACH2; NR4A1; PTGS2; …
MCF7	7	317	1.2069	0.697573	0.879054	1	1	1	HIST1H2BF; HIST1H2AC; FREM2; CA12; SDC4; IGFBP2; STC1;
Corneal epithelial cells	3	28	0.517241	3.38999	0.0577518	1	0.273595	0.944026	CA12; CLDN1; F2RL1;
051503_BAL20_gly_hui	6	268	1.03448	0.707405	0.856195	1	1	1	GRAP; PIGR; MTHFD2; SERPINA1; MAPK4; DDX21;
Ovarian follicle	2	18	0.344828	3.52068	0.109944	1	0.40014	1	CSF3; PAPPA;
Adducin	7	486	1.2069	0.455006	0.995092	1	1	1	RRS1; HLA-C; ANP32E; CD44; CTSS; DDX21; NFATC2;
MCF10A	20	661	3.44828	0.954957	0.617469	1	1	1	TP53I3; HIST1H2AC; CA12; DBI; THBS1; IL1RL1; SERPINE1; ATP2B4; ANGPTL4; S100A8; LAMC2; HLA-C; ANP32E; CD44; DDX21; FABP5; FKBP5; RBM3; SAMSN1; TJP2;
22_mars	9	196	1.55172	1.45008	0.171234	1	0.532322	1	FCGBP; DEFA1; PVR; MTUS1; SAA1; DEFA1B; SELL; TJP2; SHBG;
041803_BALF3	24	1103	4.13793	0.686685	0.983165	1	1	1	IFIT3; PIGR; FCGBP; GOLM1; DBI; NAMPT; P4HA1; CRISPLD2; PADI4; IL1B; RAB27A; S100A12; SERPINB9; S100A8; EIF5; SERPINA1; SAA1; ANP32E; CD44; FABP5; FKBP5; HLA-DRA; MNDA; S100A9;
Macrophages	27	274	4.65517	3.10959	1.98038e-07	0.000167936	2.79894e-05	9.6576e-05	FABP4; CXCL9; HBEGF; IL4R; IER3; BCL6; ETS2; PLAUR; IL1B; SLC11A1; IL10; IL1RN; HDC; FCAR; LIF; CHI3L1; S100A8; SERPINA1; CCL3; SERPINB2; IL24; CCL20; CLEC7A; CXCR2; SRGN; TREM1; UGT1A9;
Muscle	41	904	7.06897	1.43107	0.0136576	1	0.0973246	0.335814	IFIT3; TLR3; CHRNB1; TBX3; OSGIN1; BRCA1; AP1S1; TCAP; SOCS3; CEBPD; SOCS2; MAP3K8; NFIL3; KLF6; CDH19; BCL6; FOXO1; P4HA1; PFKFB3; EMP1; IRAK3; RAB27A; CASP4; FOXC1; CDH23; TGFB3; SYNE2; TNFRSF12A; AVPR1A; ADAMTS4; BIRC3; IRS2; LAMC2; PRRX1; ABLIM1; CASP7; CD44; ENO3; NFATC2; PLIN1; SGMS2;
Synovial membrane	1	8	0.172414	3.97771	0.227212	1	0.635892	1	DEFA3;
MicroProt2	31	561	5.34483	1.74372	0.00202915	1	0.0187272	0.0646172	CCL14; FABP4; PIGR; MB; DBI; DEFA1; THBS1; PLAUR; S100P; IGFBP1; CALCA; S100A12; IGFBP2; NBL1; TNFRSF12A; S100A8; SERPINA1; CNN1; FLNC; SAA1; HLA-C; COL1A1; CTSS; DEFA1B; FABP5; LECT2; S100A9; SAMSN1; SELL; SRGN; SPP1;
Hypothalamus	7	147	1.2069	1.50424	0.186261	1	0.556385	1	ACE2; GCK; NR4A1; GPRC5A; HDC; GFPT2; GFRA3;
Ventricles	6	151	1.03448	1.25549	0.345846	1	0.857537	1	GIMAP2; OSGIN1; ACE2; KCNK1; RGS2; SYNE2;
Endometrium	60	1202	10.3448	1.57493	0.000318343	0.269955	0.00421805	0.0145542	TYMS; HMMR; NINL; PRKCZ; AMOT; AMACR; ACE2; TTC8; CA12; JUNB; FOS; MYC; JUN; FOSL2; ATF3; MAP3K8; HBEGF; BCL3; IL4R; IER3; BCL6; FOXO1; PTGS2; ETS2; SLC2A3; IGFBP1; NFE2; RAB27A; SERPINE1; ACTG2; IL1RN; SYNE2; TGM2; BAZ1A; EIF5; TAGLN; CSF3; MCAM; FRMD6; MYH11; RAC1; NRG1; PAPPA; RPGR; LAMC2; CD44; CLDN1; CTSS; CXCR2; HLA-DRA; ICAM1; MCL1; MME; MXD1; PRKCE; RPS6KA5; SELL; TM4SF1; SCUBE1; SPP1;
Thalamus	34	1141	5.86207	0.94029	0.672474	1	1	1	PEG10; NINL; CNTNAP2; GIMAP2; OSGIN1; PCDH18; RBP5; GOLM1; USP18; ACBD5; CHST9; CYR61; ITPRIP; IER3; NR4A1; FGF14; PROK2; RASL10A; RND1; CALCA; CDH23; SYNE2; GFPT2; XKR4; SBNO2; MTUS1; SEMA4B; GFRA3; ARNTL2; IRF2BPL; KLHL29; GRID1; HYDIN; NCAM2;
Putamen	22	527	3.7931	1.31749	0.115739	1	0.412382	1	CNTNAP2; GIMAP2; OSGIN1; RBP5; GOLM1; USP18; SYT7; CYR61; SLITRK3; FGF14; PROK2; RND1; CALCA; SYNE2; GFPT2; SLCO1A2; RCAN1; GFRA3; ALOX5AP; AMD1; ARNTL2; GPR88;
Renal medulla	1	17	0.172414	1.8731	0.421812	1	0.972001	1	ACE2;
PT45	15	361	2.58621	1.31161	0.174642	1	0.532322	1	CYR61; THBS1; PLAUR; SDC4; IGFBP1; TNFRSF1A; SERPINE1; PVR; PTX3; MCAM; SEMA4B; ANP32E; FABP5; SGCE; SRGN;
Colorectal cancer cells	23	561	3.96552	1.29387	0.125936	1	0.427174	1	AKR1B10; LGALS4; SLC29A1; EEF1A2; TNFSF10; FCGBP; EPHA2; THBS1; S100P; SDC4; GPRC5A; MYADM; TUBB6; ACTG2; SERPINA1; MYH11; RAC1; VIL1; HLA-C; CD44; ENO3; TJP2; TSPAN8;
Jejunum	10	194	1.72414	1.62763	0.090088	1	0.359989	1	MOGAT2; GIMAP2; OSGIN1; ACE2; ANXA13; SLC2A3; SYNE2; UGT1A3; UGT1A1; UGT1A8;
ARPE-19	8	330	1.37931	0.765685	0.825211	1	1	1	GPNMB; P4HA1; TUBB6; MYH11; FLNC; CD44; MME; RBM3;
BOB2H_ISB	1	98	0.172414	0.325084	0.957801	1	1	1	SERPINA1;
Temporal lobe	19	477	3.27586	1.25719	0.182961	1	0.550182	1	CNTNAP2; OSGIN1; RBP5; GOLM1; USP18; SYT7; CHST9; CYR61; SLITRK3; IER3; NR4A1; FGF14; PROK2; RND1; SYNE2; SLCO1A2; GFRA3; ALOX5AP; ARNTL2;
hupo53_reference_cam	2	104	0.344828	0.609629	0.846269	1	1	1	MB; SERPINA1;
RMUG	15	499	2.58621	0.94889	0.620528	1	1	1	AKR1B10; HIST1H2BF; HIST1H2AC; GOLM1; DBI; THBS1; PLAUR; SDC4; SERPINE1; IGFBP2; LAMC2; HLA-C; CD44; SRGN; SPP1;
DU145	34	941	5.86207	1.14014	0.237284	1	0.659726	1	SLC29A1; EEF1A2; TMEM63A; AFP; GOLM1; GNAO1; CYR61; EPHA2; THBS1; NAMPT; IL6; SDC4; UPP1; THBD; GPRC5A; MYADM; TUBB6; ATP2B4; PVR; TGM2; TNFRSF10D; S100A8; EIF5; SERPINA1; MCAM; RAC1; SLC7A1; FLNC; SEMA4B; HLA-C; CD44; CLDN1; ENO3; ICAM1;
Lacrimal glands	16	453	2.75862	1.11488	0.364695	1	0.878583	1	TP53I3; PIGR; GOLM1; PROL1; DBI; LRRC19; THBS1; S100P; IL1RN; TGM2; S100A8; SERPINA1; ALDH1A3; SERPINB2; MNDA; S100A9;
hupo1_b1-edta_cam	1	42	0.172414	0.758426	0.741915	1	1	1	SERPINA1;
Cervix	6	104	1.03448	1.82282	0.112821	1	0.403679	1	OSGIN1; ACE2; BRCA1; CA12; CCL20; CD44;
Megakaryocytes	3	47	0.517241	2.01986	0.186336	1	0.556385	1	THBS1; STC1; SRGN;
Epidermis	9	95	1.55172	2.99158	0.00317465	1	0.0266545	0.09197	DBI; IER3; KLF5; S100A8; VCAN; CCL20; CD44; FABP5; S100A9;
Colostrum	1	8	0.172414	3.97771	0.227212	1	0.635892	1	CXCL9;
Cervico-vaginal fluid	25	565	4.31034	1.39638	0.0592776	1	0.27848	0.96088	TP53I3; AKR1B10; EEF1A2; PIGR; TRHDE; FCGBP; DBI; DEFA1; FILIP1L; NAMPT; S100P; S100A12; IL1RN; CDH23; SERPINB9; BAZ1A; S100A8; SERPINA1; TMPRSS2; VCAN; CTSS; DEFA1B; ENO3; FABP5; S100A9;
Embryo	4	104	0.689655	1.21622	0.420152	1	0.972001	1	DNMT3L; LAMC2; PRRX1; BHLHE40;
Uterine cervix	41	902	7.06897	1.43424	0.0132043	1	0.094892	0.32742	TYMS; HMMR; NINL; PRKCZ; AMOT; TTC8; RET; JUNB; FOS; ATF3; MAP3K8; IL4R; PTGS2; SLC2A3; THBD; NFE2; IL1RN; SYNE2; TGM2; CDKN1A; MAP3K14; GPM6B; BAZ1A; S100A8; EIF5; FRMD6; NRG1; RPGR; LAMC2; CD44; CLDN1; CTSS; HLA-DRA; IFNGR1; MCL1; MXD1; PRKCE; RPS6KA5; TM4SF1; SCUBE1; SPP1;
Thymus	20	456	3.44828	1.38426	0.0904214	1	0.359989	1	CKAP2; CCL14; FAM13A; BTN3A1; GRAP; BRCA1; JAKMIP2; IP6K3; DEFA1; FAM107A; VNN3; PROK2; PPAN; SYNE2; MCAM; CD274; CCL20; ARAP2; CD44; FKBP5;
Aspc1	19	483	3.27586	1.24157	0.197115	1	0.580396	1	AKR1B10; LGALS4; ANXA13; CYR61; THBS1; NAMPT; SDC4; UPP1; IGFBP1; SERPINE1; IGFBP2; TGM2; EIF5; ALDH1A3; VCAN; LAMC2; SEMA4B; ANP32E; CTSS;
Vermiform appendix	15	286	2.58621	1.65556	0.0397434	1	0.209332	0.722289	BTN3A1; GIMAP2; CASC5; RBP5; GOLM1; USP18; PROK2; TNFSF14; ADAM19; SYNE2; CCL20; ALOX5AP; CASP7; CLDN1; CLEC7A;
Distal convoluted tubule	2	17	0.344828	3.72766	0.0997431	1	0.372807	1	AMACR; CA12;
Mast cells	5	62	0.862069	2.54871	0.0464351	1	0.234387	0.808739	HDC; CCR1; CXCR2; F2RL1; FCER1G;
Cardiomyocytes	1	31	0.172414	1.02746	0.631907	1	1	1	STC1;
Bone	7	112	1.2069	1.97427	0.0654916	1	0.290769	1	CALCA; IGFBP2; TGFB3; CDKN1A; CTSS; MXD1; SPP1;
Trachea	28	612	4.82759	1.44377	0.0338301	1	0.181569	0.626495	APOL3; PDE11A; TBX3; GIMAP2; OSGIN1; ACE2; PCDH18; RET; RBP5; UBD; GOLM1; USP18; CHST9; NFIL3; KLF11; IER3; PROK2; PTGER2; SLC22A4; SYNE2; MYH11; RCAN1; GFRA3; ARAP2; F2RL1; HAMP; LGALS8; SCD;
Astrocytes	4	58	0.689655	2.18065	0.111555	1	0.401065	1	DDO; CXCL9; CD44; CXCR2;
050603_BALF11	22	1019	3.7931	0.681375	0.981166	1	1	1	TYMS; APOL3; RMND1; SLC29A1; PIGR; NAMPT; PLAUR; IL1B; TUBB6; S100A12; MTHFD2; SERPINA1; CIT; ABCD3; CD44; FKBP5; HLA-DRA; ICAM1; MME; S100A9; SCD; SPP1;
HCC78	13	249	2.24138	1.64818	0.0545396	1	0.261297	0.901592	BCAR3; C11orf52; IFIT3; SOCS3; EPHA2; GPRC5A; TGM2; IRS2; ABLIM1; PLEKHA7; RBM3; SGMS2; TJP2;
RBC	6	267	1.03448	0.710054	0.853808	1	1	1	EEF1A2; THBS1; SLC2A3; ATP2B4; RAC1; CD44;
T-lymphocytes	1	18	0.172414	1.7691	0.440157	1	1	1	ICAM1;
Hepatocytes	8	73	1.37931	3.46095	0.00213566	1	0.0190636	0.0657779	AMACR; ANGPTL4; SERPINA1; ALDH1A3; HLA-C; LECT2; TSPAN8; GSTT1;
Nervous system	7	212	1.2069	1.04305	0.510248	1	1	1	CX3CR1; HTR2B; THBD; CALCA; PMP22; RCAN1; MXD1;
HPDE6	11	414	1.89655	0.838921	0.76594	1	1	1	ME1; CYR61; THBS1; SERPINE1; EIF5; SERPINB2; FLNC; LAMC2; SAA1; CD44; FABP5;
Transverse colon	3	48	0.517241	1.97779	0.194422	1	0.576467	1	MOGAT2; GIMAP2; OSGIN1;
Occipital lobe	13	359	2.24138	1.14318	0.351627	1	0.868299	1	OSGIN1; RBP5; GOLM1; USP18; CHST9; IER3; NR4A1; FGF14; PROK2; SYNE2; GFPT2; RCAN1; GFRA3;
N06CS97	10	270	1.72414	1.1695	0.353259	1	0.868299	1	DEFA1; EPHA2; SDC4; GPRC5A; TGM2; TAGLN; FLNC; DEFA1B; FCER1G; TJP2;
Blood vessels	10	130	1.72414	2.42886	0.00845078	1	0.0639845	0.220775	CX3CR1; HTR2B; EPHA2; THBS1; IL4R; THBD; C5AR1; AVPR1A; SAA1; ICAM1;
NIBSC_glyco_qstar	2	60	0.344828	1.05662	0.571343	1	1	1	SERPINA1; SHBG;
Cartilage	7	89	1.2069	2.48441	0.0228756	1	0.142636	0.49216	EGR1; SERPINA1; VCAN; LAMC2; BHLHE40; ICAM1; MXD1;
Spermatogonia	1	23	0.172414	1.38468	0.523525	1	1	1	SERPINB9;
Milk	7	47	1.2069	4.70406	0.000648466	0.549899	0.00743106	0.0256405	CXCL9; IGFBP1; IGFBP2; IL1RN; SERPINA1; CSF3; SPP1;
Pineal gland	2	31	0.344828	2.04474	0.257716	1	0.698222	1	ACE2; CALCA;
MiaPaCa2	8	289	1.37931	0.874308	0.700497	1	1	1	CYR61; SERPINE1; TGM2; SERPINA1; VCAN; CD44; COL1A2; SRGN;
Intestine	29	508	5	1.80144	0.0017353	1	0.0169142	0.0583616	FMO1; CX3CR1; CCL14; CEBPA; PMS2; HTR2B; GGT1; AGPAT9; PPRC1; IL4R; IER3; FOXO1; P4HA1; VNN3; ELF3; MMP19; MAP3K14; BCL2A1; LAMC2; VIL1; SAA1; ARNTL2; BHLHE40; CASP7; CXCR2; FABP5; FKBP5; ICAM1; SLC3A1;
Synovial fluid	3	17	0.517241	5.58222	0.0154689	1	0.106647	0.367981	IGFBP1; IGFBP2; MCAM;
Loop of Henle	1	12	0.172414	2.65291	0.320683	1	0.802181	1	CA12;
Photoreceptor	1	4	0.172414	7.94551	0.120904	1	0.416773	1	RPGR;
Blood	19	227	3.27586	2.64169	0.000119118	0.101012	0.00187059	0.0064544	AMACR; BRCA1; DEFA1; KLF6; FOXO1; EGR1; IGFBP1; TNFRSF1A; SOCS1; CASP4; MT1A; IL10; CDH23; RPGR; SAA1; CXCR2; HAMP; HLA-DRA; NCAM2;
Stem cell	9	138	1.55172	2.05949	0.0317537	1	0.171511	0.591789	TP53I3; ME1; EEF1A2; FABP4; P4HA1; SERPINE1; ACTG2; ENO3; FABP5;
Adipocytes	17	147	2.93103	3.65008	4.29745e-06	0.00364424	0.00014577	0.00050297	ACE2; PHLDA1; CCL2; IL6; SLC2A3; IL1RL1; IGFBP1; IL1B; IGFBP2; IL10; IL1RN; LIF; ANGPTL4; OSM; CCL3; LECT2; PLIN1;
Pituitary gland	25	494	4.31034	1.59707	0.0149814	1	0.104994	0.362275	TBX10; PTTG1; DBP; PDE11A; TBX3; GIMAP2; ACE2; RET; RBP5; GOLM1; USP18; CHST9; GADD45G; IER3; GPRC5A; PROK2; CALCA; IGFBP2; SYNE2; LIF; SAA1; RCAN1; GFRA3; HLA-C; SPP1;
BOBFreezeThaw	1	64	0.172414	0.497758	0.873209	1	1	1	SERPINA1;
Caecum	3	36	0.517241	2.63687	0.104908	1	0.388374	1	MOGAT2; ACE2; NFIL3;
Vulva	38	838	6.55172	1.43085	0.0172281	1	0.113252	0.390769	TYMS; HMMR; NINL; PRKCZ; TTC8; RET; JUNB; FOS; JUN; ATF3; MAP3K8; BCL3; IL4R; THBD; NFE2; C5AR1; IL1RN; SYNE2; CDKN1A; MAP3K14; GPM6B; BAZ1A; S100A8; EIF5; MCAM; FRMD6; RPGR; LAMC2; CD44; CLDN1; IFNGR1; MCL1; MXD1; PRKCE; RPS6KA5; SELL; SCUBE1; SPP1;
032403_BALF4_glypep	3	43	0.517241	2.20771	0.154975	1	0.503521	1	PIGR; FCGBP; SERPINA1;
B cells	12	533	2.06897	0.710808	0.918148	1	1	1	SLC29A1; GGT1; DBI; NAMPT; SLC2A3; SERPINB9; PVR; RAC1; HLA-C; CD44; HLA-DRA; ICAM1;
SH-SY5Y	12	537	2.06897	0.705513	0.922585	1	1	1	DBI; SHD; STMN2; BCL6; TRIM15; TUBB6; FLNC; ANP32E; ENO3; FABP5; MXD1; MEP1B;
Adrenal cortex	1	82	0.172414	0.388507	0.929164	1	1	1	ADAMTS1;
Cytoskeleton	1	86	0.172414	0.370439	0.937765	1	1	1	TGM2;
Hematopoietic stem cells	15	200	2.58621	2.36741	0.0018318	1	0.0176519	0.0609071	CX3CR1; SLC16A13; RET; RGS1; MAFF; NFE2; C5AR1; CDKN1A; OSM; IRS2; IRF1; RFX2; CSF2RB; MXD1; SAMSN1;
Pancreatic fluid	6	136	1.03448	1.39395	0.262849	1	0.707607	1	PRSS3; DEFA1; ACTG2; TGM2; SERPINA1; DEFA3;
20_cys	1	96	0.172414	0.331856	0.954977	1	1	1	SERPINA1;
hupo1_b1-cit_cam	1	71	0.172414	0.44869	0.89889	1	1	1	SERPINA1;
Natural killer cell	6	106	1.03448	1.78843	0.120566	1	0.416773	1	PNRC1; IL18RAP; SERPINB9; CXCR2; HLA-DRA; NFATC2;
Panc1	11	346	1.89655	1.00379	0.539235	1	1	1	CYR61; IL1RL1; SERPINE1; AKAP12; PTX3; MCAM; FLNC; SEMA4B; CD44; FABP5; ICAM1;
Frontal lobe	22	480	3.7931	1.44649	0.0543937	1	0.261297	0.901592	CNTNAP2; GIMAP2; OSGIN1; RBP5; GOLM1; USP18; SYT7; CHST9; CYR61; SLITRK3; IER3; NR4A1; FGF14; PROK2; RND1; SYNE2; GFPT2; SLCO1A2; RCAN1; GFRA3; ALOX5AP; ARNTL2;
Beta cells	1	15	0.172414	2.12268	0.383302	1	0.905403	1	GCK;
Pons	3	134	0.517241	0.708556	0.801696	1	1	1	GIMAP2; OSGIN1; SYNE2;
Breast milk	3	73	0.517241	1.30056	0.409162	1	0.955838	1	PIGR; ANGPTL4; HLA-DRA;
Lymphocytes	27	468	4.65517	1.8206	0.00212754	1	0.0190636	0.0657779	CX3CR1; P2RY2; BRCA1; PIM1; IL4R; IER3; NAMPT; ZFP36; CLCF1; SLC11A1; GJA1; HDC; SERPINB9; SYNE2; GEM; CD274; RAC1; IRS2; IL24; SAA1; CCL20; CD44; CXCR2; ICAM1; IFNGR1; MT1M; SELL;
Globus pallidus	2	23	0.344828	2.75565	0.164318	1	0.525816	1	CALCA; AMD1;
01_glyco	15	667	2.58621	0.709893	0.938864	1	1	1	EEF1A2; PIGR; FCGBP; EPHA2; P4HA1; RRP12; MTHFD2; SERPINA1; CD44; FABP5; ICAM1; LGALS8; MME; SELL; SHBG;
Nucleus accumbens	8	166	1.37931	1.5221	0.157963	1	0.511271	1	GIMAP2; OSGIN1; ACE2; RBP5; GOLM1; CHST9; PROK2; SYNE2;
Bronchoalveolar fluid	10	186	1.72414	1.69763	0.0726709	1	0.314413	1	HMMR; RAB26; PMS2; PIGR; S100P; TGM2; MYH11; CD44; ICAM1; RFC1;
Striatum	1	28	0.172414	1.1375	0.594497	1	1	1	GPR88;
Corneal stromal cell	1	6	0.172414	5.30141	0.175767	1	0.532322	1	SERPINA1;
21_unfract	4	95	0.689655	1.33143	0.355337	1	0.870884	1	PCBP4; SERPINA1; MTUS1; SAA1;
CD4 cell	1	42	0.172414	0.758426	0.741915	1	1	1	SERPINB9;
Bronchial epithelial cells	8	69	1.37931	3.66155	0.00148315	1	0.0151532	0.0522852	IL4R; PFKFB3; IL1RN; SERPINA1; CSF3; CD44; F2RL1; HLA-DRA;
Frontal cortex	5	113	0.862069	1.39851	0.288541	1	0.748264	1	ACE2; CYR61; GFRA3; AMD1; WNK3;
Kidney cancer	16	352	2.75862	1.43477	0.0956926	1	0.369405	1	TBX3; AMACR; FCGBP; GGT1; THBS1; HIVEP1; SIPA1L2; MAFF; TUBB6; ACTG2; URB2; TGM2; SERPINA1; VCAN; COL1A1; COL1A2;
Umbilical vein endothelial cells	24	178	4.13793	4.25493	2.24912e-09	1.90726e-06	9.53628e-07	3.29044e-06	HMMR; PRKCZ; CXCL9; FOSL2; PHLDA1; CYR61; ATF3; NR4A1; PTGS2; EGR1; KLF5; SERPINE1; MTHFD2; PTX3; GPR3; CD274; HLA-C; ARNTL2; CXCR2; DUSP6; F2RL1; MME; SRGN; SCUBE1;
B lymphoblast	1	8	0.172414	3.97771	0.227212	1	0.635892	1	SLC11A1;
Eyes	5	122	0.862069	1.29535	0.34471	1	0.857226	1	CRYAA; CA12; IGFBP2; FOXC1; CDH23;
H2228	6	168	1.03448	1.12845	0.442095	1	1	1	BCAR3; EPHA2; GPRC5A; IRS2; RBM3; TJP2;
Dentate nucleus	2	14	0.344828	4.52588	0.070979	1	0.308668	1	CALCA; NRG1;
Stratum granulosum	1	9	0.172414	3.53624	0.251719	1	0.686359	1	FABP5;
Bone marrow stromal cells	3	19	0.517241	4.99493	0.0210367	1	0.132142	0.455948	IL1RN; CSF3; PAPPA;
Antigen presenting cells	1	4	0.172414	7.94551	0.120904	1	0.416773	1	CD274;
Ureter	1	11	0.172414	2.89387	0.298431	1	0.76456	1	ACE2;
Tongue epithelium	1	10	0.172414	3.18297	0.275451	1	0.718714	1	S100A8;
Granulocytes	12	89	2.06897	4.25646	2.35679e-05	0.0199856	0.00054015	0.00186376	UNC119; GGT1; JUNB; PIM1; VNN3; CISH; PADI4; S100A8; CD44; CXCR2; MNDA; S100A9;
CD8 cell	1	45	0.172414	0.707876	0.765743	1	1	1	SERPINB9;
hupo1_b2-cit_cam	1	65	0.172414	0.490101	0.877242	1	1	1	SERPINA1;
Ciliary epithelium	1	9	0.172414	3.53624	0.251719	1	0.686359	1	CA12;
Ventricular septum	3	82	0.517241	1.15783	0.484151	1	1	1	GIMAP2; OSGIN1; SYNE2;
Peripheral blood leukocytes	7	125	1.2069	1.76896	0.102703	1	0.381983	1	GRAP; DEFA1; MAP3K8; PROK2; HDC; CCL20; ARAP2;
BJ635	7	175	1.2069	1.26357	0.319872	1	0.802181	1	C11orf52; TMEM63A; GPRC5A; FCAR; TAGLN; FCER1G; TJP2;
Mesenchymal stromal cells	6	178	1.03448	1.06506	0.497588	1	1	1	MYADM; ATP2B4; PVR; MCAM; CD44; MME;
Osteoblasts	5	52	0.862069	3.03875	0.0240388	1	0.147717	0.509689	PTGS2; IGFBP1; CHI3L1; PAPPA; LECT2;
H1703	3	138	0.517241	0.688019	0.817462	1	1	1	EPHA2; RBM3; SGMS2;
Renal cortex	2	24	0.344828	2.64088	0.175699	1	0.532322	1	DDO; ACE2;
Ependymal cells	1	9	0.172414	3.53624	0.251719	1	0.686359	1	DDO;
T lymphocytes	3	32	0.517241	2.96637	0.0797986	1	0.340046	1	RGS2; BCL6; CCL3;
Cellzome_Abl_inhibitors_NatureBiotechnology_exp142	1	83	0.172414	0.383827	0.931419	1	1	1	TJP2;
Adipose tissue	15	155	2.58621	3.05468	0.000124987	0.105989	0.00189267	0.00653055	MOGAT2; PAQR4; FABP4; PNPLA3; AGPAT9; IL6; SLC2A3; SERPINE1; IL1RN; ANGPTL4; IRS2; CTSS; FABP5; LEPR; MXD1;
WM1158	7	212	1.2069	1.04305	0.510248	1	1	1	THBS1; ADAM19; MYH11; LAMC2; COL1A1; COL1A2; S100A9;
Scalp	1	34	0.172414	0.936827	0.665871	1	1	1	SRD5A2;
Occipital pole	8	129	1.37931	1.95864	0.0530134	1	0.256888	0.886378	CNTNAP2; SYT7; CYR61; SLITRK3; RND1; SLCO1A2; ARNTL2; CLDN1;
Chondrocytes	9	65	1.55172	4.37209	0.00019947	0.169151	0.00291639	0.0100629	JUNB; PTGS2; EGR1; IL6; CHI3L1; CCL20; CD44; CXCR2; LECT2;
hupo55_b1-cit_cam	4	78	0.689655	1.62158	0.23447	1	0.654049	1	DEFA1; SERPINA1; SAA1; DEFA1B;
Tongue	1	54	0.172414	0.589918	0.824837	1	1	1	LAMC2;
Adrenal medulla	2	71	0.344828	0.892938	0.662945	1	1	1	ADAMTS1; CLDN1;
N06cs110	7	87	1.2069	2.54152	0.0204622	1	0.129492	0.446807	DEFA1; NAMPT; FCAR; TGM2; TAGLN; IRS2; DEFA1B;
Parotid gland	1	32	0.172414	0.99536	0.643595	1	1	1	ALDH1A3;
Cerebellar cortex	2	59	0.344828	1.07452	0.562175	1	1	1	FGF14; AMD1;
BOB2L	1	96	0.172414	0.331856	0.954977	1	1	1	SERPINA1;
Bowmann's capsule	1	7	0.172414	4.54515	0.201903	1	0.588363	1	SDC4;
Gastrointestinal tract	2	23	0.344828	2.75565	0.164318	1	0.525816	1	PIGR; LECT2;
Peripheral blood cells	9	140	1.55172	2.03007	0.0343636	1	0.183273	0.632373	FRAT1; MTMR4; CA12; CDH19; MYADM; DEFA1B; ENPP2; MCL1; NFATC2;
Arteries	3	30	0.517241	3.16406	0.0683684	1	0.298848	1	ACTG2; VCAN; CD44;
Choroid	5	32	0.862069	4.93738	0.00311765	1	0.0264377	0.091222	CCL2; RAB27A; PTGER2; ICAM1; IFNGR1;
Syncytiotrophoblast	4	54	0.689655	2.34215	0.0915036	1	0.359989	1	SERPINB9; SERPINA1; PAPPA; HPGD;
Ascending colon	3	50	0.517241	1.89869	0.21084	1	0.610213	1	MOGAT2; GIMAP2; OSGIN1;
Neurons	4	68	0.689655	1.86001	0.168991	1	0.532322	1	AMACR; STMN2; GPM6B; CD44;
Zona glomerulosa	1	9	0.172414	3.53624	0.251719	1	0.686359	1	NR4A2;
Oculomotor nucleus	1	1	0.172414	31.546	0.0316992	1	0.171511	0.591789	NRG1;
Lymph	1	22	0.172414	1.44759	0.507907	1	1	1	IGFBP2;
Hematopoietic cells	1	22	0.172414	1.44759	0.507907	1	1	1	RET;
Tunica adventitia	1	1	0.172414	31.546	0.0316992	1	0.171511	0.591789	VCAN;
Purkinje cells	2	35	0.344828	1.81113	0.305086	1	0.776917	1	DDO; NRG1;
Melanoma cells	1	47	0.172414	0.67776	0.780395	1	1	1	MCAM;
Nasal mucosa	1	24	0.172414	1.32701	0.538648	1	1	1	CA12;
Umbilical cord	3	34	0.517241	2.79193	0.0919953	1	0.359989	1	ACE2; SERPINB2; FABP5;
Antrum	2	22	0.344828	2.88085	0.153076	1	0.499262	1	ACE2; HDC;
Cornea	8	82	1.37931	3.08113	0.00442284	1	0.0351519	0.12129	RET; IL4R; PTGER2; FOXC1; TGFB3; SERPINB2; ICAM1; SGK1;
Iris	1	14	0.172414	2.2742	0.363097	1	0.877225	1	PTGER2;
Retinal pigmented epithelial cells	4	51	0.689655	2.4799	0.0777147	1	0.334528	1	P2RY2; RAB27A; IL1RN; SCD;
18_size	3	104	0.517241	0.912927	0.64485	1	1	1	DEFA1; SERPINA1; DEFA1B;
Decidua	6	43	1.03448	4.40808	0.00222243	1	0.0196315	0.0677374	IGFBP1; IGFBP2; CSF3; PAPPA; CD44; SPP1;
16_clinprot_c8	2	92	0.344828	0.689137	0.793603	1	1	1	SERPINA1; SAA1;
Spermatocytes	2	42	0.344828	1.50934	0.386238	1	0.909806	1	BRCA1; SERPINB9;
Descending colon	3	56	0.517241	1.6953	0.261628	1	0.706561	1	MOGAT2; GIMAP2; OSGIN1;
Collecting duct	2	23	0.344828	2.75565	0.164318	1	0.525816	1	CA12; KCNK1;
b1-SE_nonglyco_qstar	2	90	0.344828	0.70445	0.783414	1	1	1	THBS1; SERPINA1;
Eosinophils	11	100	1.89655	3.47287	0.000325917	0.276378	0.00425197	0.0146712	UNC119; IL4R; FCAR; TNFRSF10D; SERPINA1; CCL20; ALOX5AP; CSF2RB; F2RL1; ICAM1; SELL;
Vascular endothelium	6	40	1.03448	4.73861	0.00151596	1	0.015304	0.0528058	IER3; PTX3; MCAM; CD44; FABP5; HLA-DRA;
Submandibular gland	1	25	0.172414	1.27395	0.553292	1	1	1	PROL1;
Prostrate	1	15	0.172414	2.12268	0.383302	1	0.905403	1	SAA1;
Myocardium	3	30	0.517241	3.16406	0.0683684	1	0.298848	1	RGS2; PTX3; HLA-C;
Occipital cortex	3	39	0.517241	2.43408	0.125506	1	0.427174	1	ACE2; CYR61; AMD1;
AdducinII	3	116	0.517241	0.818494	0.716191	1	1	1	THBS1; SERPINA1; PAPPA;
Granulosa lutein cells	2	28	0.344828	2.26375	0.222232	1	0.635892	1	P2RY2; HBEGF;
Proximal convoluted tubule	1	32	0.172414	0.99536	0.643595	1	1	1	AMACR;
Leydig cells	1	36	0.172414	0.884795	0.686758	1	1	1	DBI;
Myeloid stem cell	5	16	0.862069	9.87168	0.000102782	0.0871588	0.00167613	0.00578341	ZFP36; FCAR; SERPINB9; S100A8; S100A9;
BOB_Sensitivity	3	129	0.517241	0.736017	0.780401	1	1	1	S100A8; SERPINA1; S100A9;
Pulmonary artery	2	15	0.344828	4.22435	0.08023	1	0.340175	1	ACE2; MME;
Cellzome_Abl_inhibitors_NatureBiotechnology_exp143	2	87	0.344828	0.728738	0.767302	1	1	1	ANP32E; TJP2;
Gastric mucosa	5	33	0.862069	4.78781	0.00358015	1	0.0297644	0.102701	EGR1; HDC; HLA-C; TM4SF1; GSTT1;
CSF	1	12	0.172414	2.65291	0.320683	1	0.802181	1	IGFBP2;
Skin fibroblasts	13	162	2.24138	2.53326	0.00199354	1	0.0187272	0.0646172	ME1; CYR61; PELI1; PTGS2; P4HA1; SDC4; C2CD4B; TAGLN; PAPPA; IL24; CCL20; MME; SRD5A2;
Alveolar macrophage	1	18	0.172414	1.7691	0.440157	1	1	1	SERPINA1;
Islets of Langerhans	7	135	1.2069	1.63794	0.137698	1	0.461534	1	EEF1A2; HNF4A; ICA1; PFKFB3; CCL20; HLA-C; LGALS8;
Pharynx	1	10	0.172414	3.18297	0.275451	1	0.718714	1	PIGR;
Atrium	7	146	1.2069	1.51454	0.181967	1	0.549139	1	GIMAP2; OSGIN1; ACE2; UBD; KCNK1; RGS2; SYNE2;
Corpus luteum	1	12	0.172414	2.65291	0.320683	1	0.802181	1	MCAM;
Parietal lobe	2	111	0.344828	0.571187	0.871045	1	1	1	OSGIN1; SYNE2;
Uterine epithelium	1	7	0.172414	4.54515	0.201903	1	0.588363	1	CA12;
Cardiac muscle	7	64	1.2069	3.45474	0.00403545	1	0.0329045	0.113535	ME1; PALMD; CCL14; MB; IGFBP1; SYNE2; LECT2;
Uterine myometrium	6	77	1.03448	2.46191	0.0352836	1	0.187003	0.645245	ACE2; GNAO1; FOS; PTGS2; PTGER2; HPGD;
Sebaceous glands	7	29	1.2069	7.62281	2.63631e-05	0.0223559	0.000551925	0.00190439	FADS2; DBI; KLF5; CD44; LECT2; MME; SCD;
Neural stem cells	3	67	0.517241	1.41701	0.35737	1	0.873342	1	ABHD8; THBS1; SYNE2;
Spermatozoa	6	102	1.03448	1.85856	0.105337	1	0.388374	1	DBI; ACTG2; SLC22A4; DHODH; DEFB118; HLA-C;
Choroid plexus	2	18	0.344828	3.52068	0.109944	1	0.40014	1	DDO; ACE2;
Large intestine	3	39	0.517241	2.43408	0.125506	1	0.427174	1	CA12; SAA1; MEP1B;
Hair follicle	6	83	1.03448	2.28396	0.0480745	1	0.239807	0.827442	KLF5; S100A8; CD44; F2RL1; S100A9; TM4SF1;
Cytotrophoblasts	3	39	0.517241	2.43408	0.125506	1	0.427174	1	AFP; SERPINB9; HLA-C;
Glomerulus	4	44	0.689655	2.87434	0.0500153	1	0.246587	0.850837	AMACR; GNAO1; PFKFB3; MME;
Bile duct	4	31	0.689655	4.07932	0.0159503	1	0.108816	0.375463	PIGR; TSPAN8; UGT1A1; GSTT1;
Mammary epithelium	6	75	1.03448	2.52755	0.0315669	1	0.171511	0.591789	BRCA1; CXCL9; FOSB; PFKFB3; SLC22A4; CLDN1;
Dental cells	1	4	0.172414	7.94551	0.120904	1	0.416773	1	CSF3;
Lung fibroblasts	3	27	0.517241	3.5155	0.052762	1	0.256888	0.886378	SKP2; SDC4; GEM;
Karpas 299	1	24	0.172414	1.32701	0.538648	1	1	1	SLC22A11;
Schwann cells	1	17	0.172414	1.8731	0.421812	1	0.972001	1	SDC4;
B lymphocytes	5	27	0.862069	5.85137	0.00142368	1	0.0147229	0.0508008	BCL6; TNFRSF1A; CSF3; CCL3; SELL;
Malignant pleural effusions	2	31	0.344828	2.04474	0.257716	1	0.698222	1	PTX3; HLA-C;
N06BJ504	2	78	0.344828	0.812813	0.712606	1	1	1	CDH23; BAZ1A;
Proximal tubular epithelium	1	8	0.172414	3.97771	0.227212	1	0.635892	1	MME;
Paracentral gyrus	2	48	0.344828	1.32071	0.452371	1	1	1	GIMAP2; SYNE2;
Sweat glands	3	37	0.517241	2.56562	0.111617	1	0.401065	1	KLF5; CD44; F2RL1;
Trophoblast	4	44	0.689655	2.87434	0.0500153	1	0.246587	0.850837	PAPPA; SERPINB2; HLA-C; HPGD;
Vascular endothelial cells	10	63	1.72414	5.01152	2.66851e-05	0.0226289	0.000551925	0.00190439	GNAO1; NR4A1; EGR1; KLF4; C2CD4B; SERPINB9; ANGPTL4; C2CD4A; LECT2; SCUBE1;
Tooth	6	32	1.03448	5.92289	0.000443475	0.376067	0.00553039	0.0190823	EDAR; MCAM; LAMC2; COL1A1; COL1A2; SPP1;
Dentate gyrus	1	26	0.172414	1.22497	0.567471	1	1	1	NRG1;
Thymic epithelial cells	2	8	0.344828	7.91604	0.0247419	1	0.150943	0.520822	HMMR; HLA-DRA;
Nephron	2	6	0.344828	10.5503	0.0138239	1	0.097689	0.337071	CA12; STC1;
Langerhans cells	2	17	0.344828	3.72766	0.0997431	1	0.372807	1	CCL20; CLEC7A;
Bones	1	2	0.172414	15.8515	0.0623952	1	0.27848	0.96088	IGFBP2;
Vas deferens	2	17	0.344828	3.72766	0.0997431	1	0.372807	1	ACE2; MYH11;
Pulvinar	1	1	0.172414	31.546	0.0316992	1	0.171511	0.591789	AMD1;
Chorion	1	14	0.172414	2.2742	0.363097	1	0.877225	1	RASD1;
Dorsal root ganglion	1	32	0.172414	0.99536	0.643595	1	1	1	ACE2;
Microglia	2	17	0.344828	3.72766	0.0997431	1	0.372807	1	CXCR2; HLA-DRA;
Blastocyst	1	9	0.172414	3.53624	0.251719	1	0.686359	1	DNMT3L;
Proerythroblast	1	5	0.172414	6.35958	0.148776	1	0.487113	1	PAPPA;
T-lymphoblast	2	11	0.344828	5.75908	0.0456488	1	0.233194	0.804623	SLC11A1; SRGN;
Veins	1	10	0.172414	3.18297	0.275451	1	0.718714	1	VCAN;
Colon mucosa	1	46	0.172414	0.69249	0.773187	1	1	1	RNF43;
Parietal cortex	2	25	0.344828	2.53529	0.187199	1	0.557	1	ACE2; AMD1;
Hypoglossal nucleus	1	3	0.172414	10.5852	0.0921198	1	0.359989	1	NRG1;
Bronchoalveolar lavage fluid	1	4	0.172414	7.94551	0.120904	1	0.416773	1	ICAM1;
Intestinal epithelial cells	1	27	0.172414	1.17962	0.581202	1	1	1	HLA-DRA;
Spermatids	1	38	0.172414	0.83824	0.70634	1	1	1	ICA1;
Reticulocytes	1	25	0.172414	1.27395	0.553292	1	1	1	CD44;
Follicular fluid	1	2	0.172414	15.8515	0.0623952	1	0.27848	0.96088	SERPINA1;
Pancreatic acinus	2	17	0.344828	3.72766	0.0997431	1	0.372807	1	PFKFB3; F2RL1;
Parahippocampal gyrus	1	13	0.172414	2.449	0.342231	1	0.853565	1	NRG1;
Paneth cell	1	4	0.172414	7.94551	0.120904	1	0.416773	1	AMACR;
Coronary arteries	2	32	0.344828	1.98087	0.269578	1	0.718714	1	ACE2; HDC;
BOB2L_ISB	1	87	0.172414	0.366182	0.939747	1	1	1	SERPINA1;
Plasma cells	1	21	0.172414	1.51649	0.491779	1	1	1	SAA1;
Rods	3	11	0.517241	8.6243	0.00432259	1	0.03491	0.120455	UNC119; RGS1; RPGR;
Hilus	1	3	0.172414	10.5852	0.0921198	1	0.359989	1	NRG1;
Entorhinal cortex	1	7	0.172414	4.54515	0.201903	1	0.588363	1	NRG1;
Insular cortex membrane micro domains	4	75	0.689655	1.68644	0.214171	1	0.617744	1	SOCS1; GPM6B; HLA-C; WNK3;
Mononuclear phagocytes	3	12	0.517241	7.90621	0.00562886	1	0.0437915	0.1511	FCAR; FPR2; PTX3;
Osteocytes	1	5	0.172414	6.35958	0.148776	1	0.487113	1	CHI3L1;
Zona fasciculata	1	11	0.172414	2.89387	0.298431	1	0.76456	1	NR4A2;
Alveolus	1	14	0.172414	2.2742	0.363097	1	0.877225	1	PFKFB3;
Ear	1	15	0.172414	2.12268	0.383302	1	0.905403	1	CDH23;
Neuroglia	1	11	0.172414	2.89387	0.298431	1	0.76456	1	GPM6B;
Yolk sac	1	5	0.172414	6.35958	0.148776	1	0.487113	1	AFP;
Intestinal epithelium	2	24	0.344828	2.64088	0.175699	1	0.532322	1	PIGR; CCL20;
Articular cartilage	3	17	0.517241	5.58222	0.0154689	1	0.106647	0.367981	SLC2A3; IL1RN; CD44;
Subthalamus	1	10	0.172414	3.18297	0.275451	1	0.718714	1	CALCA;
Myeloid	2	5	0.344828	12.6562	0.00941261	1	0.0688094	0.237424	S100A8; S100A9;
Cerebrum	3	30	0.517241	3.16406	0.0683684	1	0.298848	1	ACE2; SLC2A3; LECT2;
Peyer's patches	1	10	0.172414	3.18297	0.275451	1	0.718714	1	PVR;
Synovial cells	2	5	0.344828	12.6562	0.00941261	1	0.0688094	0.237424	EGR1; CHI3L1;
Choriodecidua	1	10	0.172414	3.18297	0.275451	1	0.718714	1	HPGD;
Bronchioles	2	11	0.344828	5.75908	0.0456488	1	0.233194	0.804623	GOLM1; CLDN1;
Nasal tissue epithelial cells	2	24	0.344828	2.64088	0.175699	1	0.532322	1	PIGR; IL1RN;
Locus coeruleus	1	17	0.172414	1.8731	0.421812	1	0.972001	1	CALCA;
Myelocytic leukemia cell line	1	6	0.172414	5.30141	0.175767	1	0.532322	1	MND1;
Bile fluid	1	6	0.172414	5.30141	0.175767	1	0.532322	1	GGT1;
051503_BAL20_gly_lec	2	30	0.344828	2.11288	0.245863	1	0.681345	1	PIGR; SERPINA1;
Ligament	1	10	0.172414	3.18297	0.275451	1	0.718714	1	COL5A3;
Seminal plasma	1	8	0.172414	3.97771	0.227212	1	0.635892	1	PAPPA;
Fundus	1	6	0.172414	5.30141	0.175767	1	0.532322	1	ACE2;
Basophils	3	28	0.517241	3.38999	0.0577518	1	0.273595	0.944026	CXCR2; FCER1G; SELL;
Respiratory system	1	4	0.172414	7.94551	0.120904	1	0.416773	1	PIGR;
Dermal microvascular endothelial cells	1	14	0.172414	2.2742	0.363097	1	0.877225	1	FABP5;
Amnion	1	16	0.172414	1.9901	0.402866	1	0.943731	1	RASD1;
Cones	2	11	0.344828	5.75908	0.0456488	1	0.233194	0.804623	UNC119; RPGR;
Ciliary body	1	15	0.172414	2.12268	0.383302	1	0.905403	1	PTGER2;
Colon epithelium	3	32	0.517241	2.96637	0.0797986	1	0.340046	1	CXCL9; GOLM1; IL1RN;
Enterocyte	2	16	0.344828	3.96049	0.0898284	1	0.359989	1	ANXA13; CA12;
Basal cell	1	3	0.172414	10.5852	0.0921198	1	0.359989	1	NFIL3;
Lungs	1	1	0.172414	31.546	0.0316992	1	0.171511	0.591789	CCL3;
PNS	2	17	0.344828	3.72766	0.0997431	1	0.372807	1	AMACR; VCAN;
Renal tubular epithelium	1	10	0.172414	3.18297	0.275451	1	0.718714	1	PFKFB3;
HUPO28_b1-CIT	1	37	0.172414	0.860889	0.696707	1	1	1	SERPINA1;
Oesophagus epithelium	2	11	0.344828	5.75908	0.0456488	1	0.233194	0.804623	KLF4; S100A8;
Tendons	1	6	0.172414	5.30141	0.175767	1	0.532322	1	COL5A3;
Pancreatic duct	1	17	0.172414	1.8731	0.421812	1	0.972001	1	PFKFB3;
Gingiva	1	11	0.172414	2.89387	0.298431	1	0.76456	1	EGR1;
White matter	2	13	0.344828	4.87375	0.0621084	1	0.27848	0.96088	NRG1; AMD1;
Testin	1	1	0.172414	31.546	0.0316992	1	0.171511	0.591789	RPGR;
Ileum epithelium	1	3	0.172414	10.5852	0.0921198	1	0.359989	1	IL1RN;
Superior colliculus	2	4	0.344828	15.8123	0.00576842	1	0.0444693	0.153439	CALCA; NRG1;
Vagus nucleus	1	2	0.172414	15.8515	0.0623952	1	0.27848	0.96088	NRG1;
Renal pelvis	1	4	0.172414	7.94551	0.120904	1	0.416773	1	ACE2;
Olfactory bulb	1	12	0.172414	2.65291	0.320683	1	0.802181	1	IP6K3;
Follicular dendritic cells	1	2	0.172414	15.8515	0.0623952	1	0.27848	0.96088	PVR;
Ovarian follicular fluid	2	5	0.344828	12.6562	0.00941261	1	0.0688094	0.237424	IGFBP1; SERPINA1;
Hofbauer cells	1	3	0.172414	10.5852	0.0921198	1	0.359989	1	SERPINA1;
Inferior olivary nuclear complex	1	3	0.172414	10.5852	0.0921198	1	0.359989	1	NRG1;
Synovial fluid	1	1	0.172414	31.546	0.0316992	1	0.171511	0.591789	IGFBP2;
Buccal epithelium	1	3	0.172414	10.5852	0.0921198	1	0.359989	1	S100A8;
Vascular system	1	6	0.172414	5.30141	0.175767	1	0.532322	1	MCAM;
Pancreatic islet cells	1	2	0.172414	15.8515	0.0623952	1	0.27848	0.96088	CCL20;
Stratum spinosum	1	6	0.172414	5.30141	0.175767	1	0.532322	1	FABP5;
Fetal lung	1	1	0.172414	31.546	0.0316992	1	0.171511	0.591789	SLCO1A2;
Red nucleus	2	7	0.344828	9.04529	0.0189502	1	0.121741	0.42006	CALCA; NRG1;
Cervical mucus	1	5	0.172414	6.35958	0.148776	1	0.487113	1	PAPPA;
Podocyte	1	12	0.172414	2.65291	0.320683	1	0.802181	1	PTGS2;
White adipose tissue	1	10	0.172414	3.18297	0.275451	1	0.718714	1	ME1;
Cranial nerve	1	3	0.172414	10.5852	0.0921198	1	0.359989	1	CALCA;
Cingulum	1	1	0.172414	31.546	0.0316992	1	0.171511	0.591789	ACE2;
Corpus	1	5	0.172414	6.35958	0.148776	1	0.487113	1	HDC;
Umbilical artery	1	8	0.172414	3.97771	0.227212	1	0.635892	1	MYH11;
Airway epithelium	2	7	0.344828	9.04529	0.0189502	1	0.121741	0.42006	PIGR; MME;
Epimysium	1	1	0.172414	31.546	0.0316992	1	0.171511	0.591789	COL5A3;
B cell	1	3	0.172414	10.5852	0.0921198	1	0.359989	1	IL4R;
Kupffer cell	1	8	0.172414	3.97771	0.227212	1	0.635892	1	FCAR;
Pericardial fluid	1	2	0.172414	15.8515	0.0623952	1	0.27848	0.96088	IL6;
Corneal endothelium	1	5	0.172414	6.35958	0.148776	1	0.487113	1	CA12;
Sclera	1	8	0.172414	3.97771	0.227212	1	0.635892	1	PTGER2;
Pars compacta	1	2	0.172414	15.8515	0.0623952	1	0.27848	0.96088	NRG1;
Inferior colliculus	1	3	0.172414	10.5852	0.0921198	1	0.359989	1	CALCA;
Fetal brain	1	2	0.172414	15.8515	0.0623952	1	0.27848	0.96088	SLCO1A2;
Peripheral blood lymphocytes	2	3	0.344828	21.0656	0.0029461	1	0.0252352	0.087073	CKAP2; SYNE2;
Biliary apparatus	1	6	0.172414	5.30141	0.175767	1	0.532322	1	UGT1A3;
Prostate cancer cell	1	6	0.172414	5.30141	0.175767	1	0.532322	1	MND1;
Faeces	1	1	0.172414	31.546	0.0316992	1	0.171511	0.591789	SERPINA1;
Anterior commissure	1	1	0.172414	31.546	0.0316992	1	0.171511	0.591789	CALCA;
Muscle fibre	1	3	0.172414	10.5852	0.0921198	1	0.359989	1	MB;
Ventral tegmentum	1	2	0.172414	15.8515	0.0623952	1	0.27848	0.96088	NR4A2;
Sweat	2	3	0.344828	21.0656	0.0029461	1	0.0252352	0.087073	DBI; LECT2;
Insular claustrum	1	1	0.172414	31.546	0.0316992	1	0.171511	0.591789	AMD1;
Mesangial cell	1	1	0.172414	31.546	0.0316992	1	0.171511	0.591789	SERPINE1;
Fornix	1	1	0.172414	31.546	0.0316992	1	0.171511	0.591789	CALCA;
T lymphocytes and B lymphocytes	1	1	0.172414	31.546	0.0316992	1	0.171511	0.591789	ACKR3;

## Sheet: Transcription factor
Analysis: Transcription factor
Dataset name: NH
Transcription factor	No. of genes in the dataset	No. of genes in the background dataset	Percentage of genes	Fold enrichment	P-value (Hypergeometric test)	Bonferroni method	BH method	Q-value (Storey-Tibshirani method)	genes mapped (from input data set)
MAFB	8	352	1.6129	0.69975	0.890131	1	0.996029	0.967898	OSGIN1; FOS; CREB5; GJA1; CIT; SORCS1; SGCE; NCAM2;
NFIC	117	2040	23.5887	1.76383	2.56074e-10	5.37756e-08	5.37756e-08	5.22568e-08	BCAR3; RNF43; SLC29A1; UNC119; EDAR; PKIB; NINL; ZNF219; CNTNAP2; AFP; ZNF385B; FREM2; NOL4; GGT1; UBD; HNF4A; FADS2; MB; TBX15; SYT7; C2orf82; ACBD5; C15orf52; KANK4; GADD45B; FOSB; PIM1; SOCS2; FOSL2; FAM107A; ADAMTS1; MAP3K8; HBEGF; BCL3; RGS1; THBS1; SIK1; IER3; RALGDS; SPRY4; NR4A1; PTGS2; ETS2; EGR1; IL6; HIVEP1; SLC2A3; SDC4; SIPA1L2; MAFF; KLF5; PROK2; CREB5; PIM3; LYST; KLF4; NR4A2; MYAD…
NR1H3	33	1020	6.65323	0.99519	0.538906	1	0.759532	0.738081	RNF43; RTP3; RMND1; PALMD; ANKS4B; SLC22A7; ZNF219; AMOT; PCDH18; TMEM92; TCAP; FADS2; SOCS2; BCL3; HAS2; MBNL2; NR5A2; CDH23; TGFB3; ADAMTS4; CD274; SBNO2; MAPK4; CCL20; ABLIM1; AMD1; FKBP5; PLEKHA7; RPS6KA5; SGCE; SGK1; HYDIN; SCUBE1;
PITX3	13	265	2.62097	1.50966	0.092762	1	0.318244	0.309255	BCAR3; CNTNAP2; GPNMB; EPHA2; CDH19; FGF14; CREB5; MBNL2; RAX2; MAK; DUSP6; ENPP2; SGCE;
RXRA	32	1113	6.45161	0.884406	0.792846	1	0.945479	0.918776	RNF43; RTP3; RMND1; FRMD7; ANKS4B; SLC22A7; ZNF219; CNTNAP2; PCDH18; FREM2; TMEM92; GCK; TCAP; GPNMB; SOCS2; EPHA2; NR4A1; C17orf96; IVNS1ABP; RBPMS; RASL10A; MBNL2; MMP19; NFKBIZ; CDH23; CNN1; SBNO2; CCL20; ABLIM1; SGCE; HYDIN; SCUBE1;
SOAT1	58	1261	11.6935	1.41465	0.00444728	0.93393	0.0466965	0.0453776	IFIT2; SLC29A1; TLR7; PALMD; SAMD3; TBX3; AMOT; SPHK2; TBX15; ACBD5; TRPM8; GADD45B; SOCS3; JUN; SOCS2; ARID5B; NFIL3; CCL2; KLF6; BCL3; THBS1; NAMPT; EGR1; ZFP36; MAFF; TRIM15; KLF5; PROK2; CREB5; NR4A3; NR4A2; NR5A2; STC1; TGFB3; MAP3K14; MMP25; TEAD4; ADAMTS4; MTHFD2; GPR3; FRMD6; OSM; SBNO2; CCL3; EFHD1; VCAN; IRF1; SORCS1; ABLIM1; COL1A2; ENPP2; ICAM1; LECT2; NFATC2; NUDT13; SRGN; UGT2A3; WN…
STAT1	58	1261	11.6935	1.41465	0.00444728	0.93393	0.0466965	0.0453776	IFIT2; SLC29A1; TLR7; PALMD; SAMD3; TBX3; AMOT; SPHK2; TBX15; ACBD5; TRPM8; GADD45B; SOCS3; JUN; SOCS2; ARID5B; NFIL3; CCL2; KLF6; BCL3; THBS1; NAMPT; EGR1; ZFP36; MAFF; TRIM15; KLF5; PROK2; CREB5; NR4A3; NR4A2; NR5A2; STC1; TGFB3; MAP3K14; MMP25; TEAD4; ADAMTS4; MTHFD2; GPR3; FRMD6; OSM; SBNO2; CCL3; EFHD1; VCAN; IRF1; SORCS1; ABLIM1; COL1A2; ENPP2; ICAM1; LECT2; NFATC2; NUDT13; SRGN; UGT2A3; WN…
DLX2	8	171	1.6129	1.44038	0.193991	1	0.473679	0.460301	PCDH18; ZNF385B; FREM2; BACH2; P4HA1; CDC42EP3; COL1A2; RIPK4;
DLX3	15	413	3.02419	1.1176	0.367492	1	0.622365	0.604788	FRAT1; PDE11A; FANCL; ZNF385B; FREM2; GPNMB; C15orf52; APOLD1; CREB5; GRHL1; SERPINB2; PRRX1; COL1A2; RIPK4; SAMSN1;
ETS1	82	2496	16.5323	1.01038	0.478385	1	0.717577	0.69731	BCAR3; RNF43; LGALS4; IFIT2; MANBAL; SLC12A1; PDE11A; NINL; TMEM63A; AMOT; MTMR4; PNPLA3; ORAI3; TRHDE; FREM2; GGT1; SLC25A42; GCK; TBX15; C15orf52; JUNB; FOSL2; AGPAT9; PPRC1; EPHA2; ARID5B; HBEGF; KLF6; BCL3; ITPRIP; RGS1; APOLD1; THBS1; ZC3H12A; EGR1; FOSL1; PFKFB3; EMP1; IL1RL1; MAFF; THBD; CREB5; NR4A3; NR4A2; MBNL2; TUBB6; MIDN; C2CD4B; SLC11A1; IL1RN; NCOA7; FCAR; MMP19; TGFB3; TGM2; LIF; …
HNF1A	45	831	9.07258	1.66559	0.000545179	0.114488	0.0114488	0.0111254	BCAR3; GRIA3; PALMD; SAMD3; ANKS4B; GPAM; AMOT; ACE2; AFP; ZNF385B; ANXA13; UGT1A6; HNF4A; SLC5A12; LRRC19; STMN2; MYC; ARID5B; ITPRIP; EGR1; IGFBP1; IVNS1ABP; KLF5; CLCF1; CREB5; MBNL2; ARL14; NR5A2; ELF3; NCOA7; RASD1; TNFAIP6; SERPINA1; NRG1; RCAN1; F2RL1; FKBP5; LECT2; MLIP; SGCE; TIFA; TJP2; TSPAN8; UGT2A3; SPP1;
HOXC9	23	573	4.6371	1.23487	0.175037	1	0.467577	0.454371	BCAR3; ME1; SLC12A1; AMOT; ZNF385B; TBX15; ICA1; ACBD5; ARID5B; ETNK1; SIPA1L2; TRIM15; KLF5; CREB5; SLC22A4; AKAP12; FRMD6; EFHD1; PAPPA; SORCS1; COL1A2; FAM20A; PRKCE;
IRF1	40	811	8.06452	1.51708	0.00572393	1	0.0572393	0.0556227	RNF43; GRIA3; C11orf52; IFIT3; IFIT2; TRIM14; TLR7; FAM168A; TLR3; SPTLC3; OAS1; PCDH18; PIGR; TBX15; USP18; FAM47E; CEBPD; ATF3; ARID5B; THBS1; NAMPT; ETNK1; EMP1; PROK2; CLCF1; CREB5; SOCS1; NR4A2; NCOA7; SPSB1; OSM; CD274; PAPPA; BCL2A1; CLEC7A; ENPP2; ERAP2; LGALS8; SAMSN1; MEP1B;
LHX3	43	1210	8.66935	1.09306	0.29172	1	0.582649	0.566193	BCAR3; KRT222; PALMD; SAMD3; ZNF219; AMOT; CNTNAP2; AFP; HTR2B; GPNMB; CA12; ICA1; ACBD5; MRAP; TRPM8; MAP3K8; KLF6; PELI1; IRAK3; KLF5; CREB5; LYST; MBNL2; GJA1; HDC; SPSB1; GPM6B; CHI3L1; BAZ1A; ALDH1A3; PDLIM3; VCAN; NRG1; MTUS1; SORCS1; PRRX1; ABLIM1; ARAP2; CLEC7A; COL1A2; MXD1; SGCE; TSPAN8;
MEF2A	67	1835	13.5081	1.12297	0.168533	1	0.459636	0.446655	LRRC20; BCAR3; KRT222; EEF1A2; SAMD3; PKIB; HIST1H2BF; DBNDD1; AMOT; FABP4; FANCL; ZNF385B; PIGR; SLC16A13; GCK; TCAP; UBD; USP18; FOS; JUN; FOSL2; ADAMTS1; ATF3; ARID5B; NFIL3; HBEGF; KLF6; ITPRIP; ELL; BACH2; NR4A1; NAMPT; C10orf10; IGFBP1; HAS2; PROK2; CREB5; NR4A3; CDC42EP3; NR4A2; MBNL2; NCOA7; ERN1; CDH23; VNN2; LIF; CDKN1A; DUSP10; CD274; EFHD1; IRF1; MTUS1; FLNC; RCAN1; PRRX1; ABLIM1; ACK…
NKX6-1	51	1408	10.2823	1.11408	0.225866	1	0.490639	0.476782	FMO1; RNF43; FRAT1; ME1; PALMD; SAMD3; CNTNAP2; FABP4; KIAA1161; FANCL; AFP; ZNF385B; HTR2B; TBX15; ICA1; ACBD5; SLC5A12; TRPM8; ATF3; KLF6; FILIP1L; PELI1; BACH2; FOXO1; ETS2; SIPA1L2; KLF5; CLCF1; CREB5; LYST; NCOA7; STC1; GPM6B; BAZ1A; SLC7A1; EFHD1; NRG1; SORCS1; PRRX1; ABCD3; ABLIM1; ALOX5AP; COL1A2; CTSS; MLIP; NFATC2; PRKCE; SAMSN1; SGCE; TJP2; NCAM2;
OTX2	8	324	1.6129	0.76022	0.831513	1	0.980226	0.952542	SLC12A1; SPATA18; PAQR4; CNTNAP2; LYST; SLC7A1; SGCE; WNK3;
PHOX2A	15	442	3.02419	1.04427	0.470217	1	0.715548	0.695339	PCDH18; GOLM1; GNAO1; TRPM8; PELI1; KLF5; CREB5; GPM6B; CHI3L1; BAZ1A; NRG1; SORCS1; ABLIM1; ARAP2; COL1A2;
POU2F1	74	2209	14.9194	1.03029	0.40908	1	0.650809	0.632428	BCAR3; KRT222; GRIA3; IFIT2; RAB26; PALMD; PDE11A; PMS2; HIST1H2BF; CNTNAP2; FABP4; CENPQ; PNPLA3; HIST1H2AC; ANXA9; ZNF385B; TRHDE; TBX15; STMN2; TRPM8; CYR61; ATF3; MAP3K8; PELI1; ITPRIP; SERTAD1; RGS2; ETS2; SIPA1L2; FGF14; GPRC5A; KLF5; CREB5; LYST; IL1B; NR4A3; CDC42EP3; NR4A2; MBNL2; CALCA; ELF3; GJA1; NCOA7; STC1; GPM6B; TNFAIP6; BAZ1A; XKR4; CSF3; CD274; PDLIM3; NRG1; PAPPA; MTUS1; SORCS1…
POU3F2	35	789	7.05645	1.3645	0.0386936	1	0.188969	0.183632	BCAR3; FABP4; CENPQ; HIST1H2AC; AFP; ZNF385B; LRIG3; TRPM8; ATF3; MAP3K8; HBEGF; PELI1; FOXO1; CREB5; LYST; NR4A3; MBNL2; GPM6B; CHI3L1; BAZ1A; GPR3; ALDH1A3; NRG1; MTUS1; SORCS1; RCAN1; ABCD3; ABLIM1; ALOX5AP; CLEC7A; COL1A2; CXCR2; NUDT13; TJP2; NCAM2;
SRF	34	462	6.85484	2.26371	8.16071e-06	0.00171375	0.000856874	0.000832673	ZNF219; ZNF385B; HTR2B; LRIG3; GNAO1; JUNB; FOSB; FOS; CYR61; HBEGF; KLF6; FILIP1L; THBS1; NR4A1; ETS2; EGR1; FOSL1; EGR3; CDC42EP3; MYADM; ACTG2; DUSP10; AKAP12; ADAMTS4; TAGLN; MCAM; CNN1; MYH11; SLC7A1; CCL3; FLNC; VIL1; MAPK4; MLIP;
ARID3A	46	1250	9.27419	1.13189	0.207445	1	0.47872	0.465199	TMEM169; BCAR3; GRIA3; CYP7A1; C11orf52; PALMD; SAMD3; ANKRD29; PDE11A; CXCL9; NOL4; JAKMIP2; NCAPG2; GPNMB; LRIG3; CA12; SLC5A12; DCDC2; TRPM8; CYR61; MAP3K8; ARID5B; FILIP1L; ETS2; ETNK1; FGF14; KLF5; PROK2; MBNL2; IL1RN; GJA1; HDC; SPSB1; BAZ1A; ALDH1A3; EFHD1; NRG1; ABCD3; ABLIM1; COL1A2; SELL; TMEM154; TSPAN13; TSPAN8; YPEL2; SPP1;
EHF	15	753	3.02419	0.612978	0.987204	1	1	0.971757	MANBAL; ONECUT1; CENPQ; CCL2; ETNK1; NR4A2; CALCA; SBNO2; IRF1; RPGR; LAMC2; CTSS; DUSP6; MCL1; SCUBE1;
FOXA1	38	804	7.66129	1.45379	0.0133456	1	0.103308	0.10039	BCAR3; RNF43; GRIA3; CYP7A1; PALMD; SAMD3; RALGPS1; FAM13A; GPAM; PCDH18; LRIG3; CYR61; ADAMTS1; ARID5B; NR4A1; IL1RL1; FGF14; KLF5; CREB5; CDC42EP3; MBNL2; RND1; PTGER2; TGFB3; SYNE2; CDKN1A; AKAP12; SLC7A1; VCAN; PAPPA; MTUS1; ABCD3; DUSP6; ENPP2; SGK1; SGMS2; SRGN; TSPAN8;
ATF1	52	1037	10.4839	1.5423	0.00119329	0.250592	0.0192763	0.0187319	BCAR3; UNC119; KBTBD3; DBP; PMS2; TBX3; PRKCZ; NOL4; GGT1; SPHK2; RBP5; GNAO1; FOSB; FOS; PPP1R15A; FOSL2; EPHA2; NFIL3; KLF11; FILIP1L; PNRC1; ITPRIP; RGS1; RGS2; SIK1; BACH2; FOSL1; HIVEP1; C17orf96; EMP1; MAFF; GPRC5A; CREB5; EGR3; MBNL2; RND1; CALCA; ATP2B4; NBL1; TGFB3; GPM6B; GEM; MTHFD2; GPR3; MCAM; PDLIM3; VCAN; RPGR; RCAN1; ELL2; IRF2BPL; ZBTB21;
CREB1	44	973	8.87097	1.39091	0.0165377	1	0.115764	0.112494	THAP2; FRAT1; KBTBD3; DBP; PMS2; PRKCZ; NOL4; GGT1; FAM124B; SPHK2; RBP5; FOSB; PPP1R15A; JUN; EPHA2; KLF11; FILIP1L; PNRC1; SIK1; ZC3H12A; BACH2; HIVEP1; MAFF; FGF14; CREB5; NR4A2; MBNL2; CALCA; IL1RN; ODF3L1; GEM; GPR3; MCAM; OSM; PDLIM3; RCAN1; DDX21; ELL2; IRF2BPL; PRKCE; RGCC; RIPK4; ZBTB21; RFC1;
JDP2	37	763	7.45968	1.49161	0.00998015	1	0.0883162	0.0858219	DBP; FAM13A; PRKCZ; NOL4; GGT1; SPHK2; RBP5; SYT7; FOSB; PPP1R15A; JUN; EPHA2; KLF11; KLF6; PNRC1; KCNK1; BACH2; HIVEP1; MAFF; CREB5; MBNL2; CALCA; LPAR1; ODF3L1; DUSP10; GPM6B; GEM; TAGLN; GPR3; MCAM; OSM; PDLIM3; RCAN1; IRF2BPL; MXD1; ZBTB21; RFC1;
NFYA	95	2544	19.1532	1.14846	0.076472	1	0.297391	0.288992	LRRC20; ASPM; CKAP2; GRIA3; DBP; SLC12A1; RALGPS1; FAM13A; PDE11A; PMS2; HIST1H2BF; DBNDD1; TMEM63A; GPAM; PAQR4; PRKCZ; PRPF40B; PITPNM2; OSGIN1; MTMR4; HIST1H2AC; PCDH18; CXCL9; TRHDE; UBE2T; FREM2; NOL4; SLC16A13; SLC25A42; RBP5; LRIG3; TBX15; DBI; COL5A3; JUNB; FOSB; JUN; GADD45G; KLF11; HBEGF; KLF6; PNRC1; ITPRIP; APOLD1; SERTAD1; THBS1; FOXO1; ETS2; CREB5; PIM3; KLF4; MBNL2; RND1; MIDN; CAL…
PLAU	52	1037	10.4839	1.5423	0.00119329	0.250592	0.0192763	0.0187319	BCAR3; UNC119; KBTBD3; DBP; PMS2; TBX3; PRKCZ; NOL4; GGT1; SPHK2; RBP5; GNAO1; FOSB; FOS; PPP1R15A; FOSL2; EPHA2; NFIL3; KLF11; FILIP1L; PNRC1; ITPRIP; RGS1; RGS2; SIK1; BACH2; FOSL1; HIVEP1; C17orf96; EMP1; MAFF; GPRC5A; CREB5; EGR3; MBNL2; RND1; CALCA; ATP2B4; NBL1; TGFB3; GPM6B; GEM; MTHFD2; GPR3; MCAM; PDLIM3; VCAN; RPGR; RCAN1; ELL2; IRF2BPL; ZBTB21;
RORA	35	1168	7.05645	0.921745	0.720006	1	0.884218	0.859245	LRRC20; PALMD; DBP; CNTNAP2; AFP; ZNF385B; SLC22A11; JAKMIP2; LRIG3; DBI; ICA1; PIM1; MAP3K8; NFIL3; PNRC1; KCNK1; IER3; BACH2; PFKFB3; IVNS1ABP; CREB5; LARP1B; MBNL2; MIDN; NCOA7; CD274; PAPPA; SORCS1; ABLIM1; ANP32E; ARAP2; FAM20A; LGALS8; MNDA; SGMS2;
YY1	26	1317	5.24194	0.607318	0.998636	1	1	0.971757	THAP2; SAMD3; PDE11A; CD3G; CASC5; FADS2; GNAO1; PIM1; AGPAT9; PPRC1; ARID5B; IL6; ERN1; STC1; DUSP10; EIF5; RAC1; CIT; RCAN1; ANP32E; COL1A2; DEPTOR; DUSP6; ENO3; TSLP; WNK3;
ELK1	45	1986	9.07258	0.696936	0.997762	1	1	0.971757	LRRC20; KDELR3; SLC12A1; ANKS4B; SPTLC3; GRAP; TRHDE; RNF214; HNF4A; SYT7; CHST9; GADD45B; FOS; JUN; FOSL2; HBEGF; KCNK1; APOLD1; SPRY4; NR4A1; FOXO1; EGR1; TRIM15; IVNS1ABP; LYST; CDC42EP3; CALCA; ATP2B4; C2CD4B; PPAN; NFKBIZ; CDH23; NFKB2; GPM6B; S100A8; SBNO2; RAC1; RCAN1; DDX21; DUSP6; MCL1; NFATC2; PRKCE; SRGN; SCUBE1;
GABPA	56	2702	11.2903	0.637447	0.999977	1	1	0.971757	NOL3; C19orf25; THAP2; MANBAL; C19orf44; MTMR4; CENPQ; KIAA1161; ORAI3; PIGR; TRHDE; RNF214; DBI; ACBD5; C15orf52; JUN; EPHA2; APOLD1; SERTAD1; IL4R; EGR1; PFKFB3; ZFP36; SDC4; TRIM15; HAS2; RRS1; NR4A3; CDC42EP3; NR4A2; MIDN; CALCA; PPAN; RRP12; URB2; CDH23; AKAP12; OSM; SBNO2; TMPRSS2; PMP22; ALDH1A3; IRF1; ROM1; RPGR; ANKRD37; DDX21; DUSP6; ENO3; FCER1G; HS3ST3B1; MCL1; OSGIN2; SRGN; SCUBE1; S…
CTCF	104	2605	20.9677	1.22781	0.012795	1	0.103308	0.10039	TP53I3; BCAR3; GRIA3; NOL3; RAB26; SLC29A1; EEF1A2; UNC119; KDELR3; KBTBD3; C14orf80; RALGPS1; EDAR; PDE11A; CDH15; PAQR4; PRPF40B; MTMR4; GRAP; ZNF385B; PIGR; FREM2; TMEM92; GGT1; SLC22A11; FADS2; MB; TBX15; GNAO1; ICA1; C15orf52; DCDC2; GADD45B; SOCS3; MYC; CEBPD; GADD45G; PIM1; FOSL2; FAM107A; PPRC1; EPHA2; HBEGF; SERTAD1; RGS2; THBS1; RALGDS; ZC3H12A; NR4A1; ETS2; P4HA1; EGR1; PFKFB3; TRIM15;…
FEV	30	526	6.04839	1.75443	0.0021053	0.442112	0.0294741	0.0286417	FAM13A; AMOT; ZNF385B; C15orf52; FOSL2; ARID5B; HBEGF; FILIP1L; ITPRIP; APOLD1; FOSL1; CREB5; NR4A3; ELF3; NCOA7; IL18RAP; NFKBIZ; ADAMTS4; SBNO2; RAC1; VCAN; RCAN1; ABLIM1; CLEC7A; ENPP2; FAM20A; SELL; SGK1; SRGN; TMEM154;
HERPUD1	14	421	2.82258	1.02332	0.504626	1	0.734077	0.713345	OSGIN1; KIAA1161; TTC8; NOL4; RET; FAM107A; SOCS1; NR4A2; ATP2B4; IL1RN; RFX2; ENPP2; F2RL1; SCUBE1;
KLF7	145	4448	29.2339	1.00253	0.503041	1	0.734077	0.713345	TP53I3; TYMS; BCAR3; CKAP2; FBXO27; LGALS4; NOL3; FBXO2; SLC29A1; P2RY2; UNC119; PTTG1; KBTBD3; DBP; PAQR7; C14orf80; ONECUT1; RALGPS1; MARVELD3; PDE11A; NINL; NAGS; CDH15; CHRNB1; ZNF219; PAQR4; CNTNAP2; PRPF40B; OSGIN1; PNPLA3; KIAA1161; SLC16A13; SLC25A42; CASC5; RET; RNF214; RBP5; NCAPG2; KIF22; MB; ABHD8; ICA1; ACBD5; STMN2; GADD45B; FOSB; FOS; PPP1R15A; FOSL2; EPHA2; ARID5B; KLF11; PELI1; P…
MAF	25	466	5.04032	1.65038	0.0100933	1	0.0883162	0.0858219	RNF43; FBXO2; ME1; ZNF219; ICA1; STMN2; PIM1; EPHA2; ELL; BACH2; ETS2; IL6; RBPMS; GJA1; CDH23; MYBPH; DUSP10; ANGPTL4; ROM1; RCAN1; ABLIM1; ANP32E; COL1A2; FKBP5; RIPK4;
NANOG	7	204	1.41129	1.05665	0.496688	1	0.734077	0.713345	HBEGF; BACH2; FOSL1; PPAN; TGFB3; RAC1; NFATC2;
NR5A1	36	1129	7.25806	0.980823	0.575021	1	0.77906	0.757057	GRIA3; CYP7A1; EEF1A2; FAM13A; PDE11A; OSGIN1; KIAA1161; ZNF385B; PIGR; SLC16A13; ABCG8; MB; SHD; NFIL3; PNRC1; KCNK1; SPRY4; SIPA1L2; CLCF1; CREB5; MIDN; NCOA7; CDH23; ADAMTS4; SERPINA1; SLC7A1; FLNC; LAMC2; SEMA4B; RCAN1; AMD1; CCR1; PLEKHA7; PRKCE; RPS6KA5; SRGN;
RFX1	62	2158	12.5	0.883636	0.873077	1	0.985732	0.957892	HMMR; SLC29A1; TLR7; C14orf80; SLC12A1; C19orf44; AMOT; GSTCD; TTC8; ORAI3; JAKMIP2; FADS2; MB; ABHD8; ACBD5; JUNB; FOSB; PPP1R15A; GADD45G; FAM107A; MAP3K8; HBEGF; PELI1; SIK1; ZC3H12A; ETS2; P4HA1; SIPA1L2; UPP1; FGF14; KLF4; C5AR1; CDC42EP3; NR4A2; MYADM; MIDN; NR5A2; ATP2B4; ACTG2; SLC11A1; HDC; PPAN; RRP12; ODF3L1; MAP3K14; EIF5; CIT; RFX2; MTUS1; C2CD4A; SORCS1; SEMA4B; PRRX1; AMD1; COL1A1;…
RREB1	85	2136	17.1371	1.22386	0.0261961	1	0.157176	0.152737	TBX10; FBXO2; THAP2; SLC29A1; P2RY2; SKP2; EEF1A2; UNC119; DBP; SAMD3; ONECUT1; FAM168A; TMEM63A; SLC22A7; TBX3; AMOT; PRPF40B; PITPNM2; ZNF385B; PIGR; TMEM92; NOL4; RET; HNF4A; FADS2; GNAO1; FAM47E; C2orf82; TRPM8; PIM1; SOCS2; EPHA2; MAP3K8; ARID5B; PNRC1; ELL; APOLD1; NR4A1; ETS2; EGR1; TNFRSF1A; PADI4; RBPMS; CLCF1; CREB5; EGR3; NR4A3; NR4A2; RASL10A; ATP2B4; GJA1; HDC; IL18RAP; LPAR1; NBL1; …
SF1	36	1129	7.25806	0.980823	0.575021	1	0.77906	0.757057	GRIA3; CYP7A1; EEF1A2; FAM13A; PDE11A; OSGIN1; KIAA1161; ZNF385B; PIGR; SLC16A13; ABCG8; MB; SHD; NFIL3; PNRC1; KCNK1; SPRY4; SIPA1L2; CLCF1; CREB5; MIDN; NCOA7; CDH23; ADAMTS4; SERPINA1; SLC7A1; FLNC; LAMC2; SEMA4B; RCAN1; AMD1; CCR1; PLEKHA7; PRKCE; RPS6KA5; SRGN;
SP1	237	7140	47.7823	1.02078	0.346074	1	0.615383	0.598003	TP53I3; TYMS; HMMR; LRRC20; BCAR3; CKAP2; FBXO27; PDP2; NOL3; C19orf25; FBXO2; RAB26; TRIM14; THAP2; SLC29A1; P2RY2; EEF1A2; UNC119; SLC7A6OS; PTTG1; KBTBD3; DBP; PAQR7; SAMD3; C14orf80; ONECUT1; RALGPS1; FAM168A; MARVELD3; MND1; PDE11A; PKIB; NINL; DBNDD1; NAGS; CDH15; CHRNB1; ZNF219; PAQR4; PRKCZ; AMOT; CNTNAP2; PRPF40B; OSGIN1; GSTCD; MTMR4; PNPLA3; KIAA1161; TRHDE; TMEM92; NOL4; SLC16A13; SLC…
SP4	139	4345	28.0242	0.983831	0.60874	1	0.798972	0.776406	GINS2; PDP2; RAB26; TRIM14; P2RY2; UNC119; SLC7A6OS; KBTBD3; DBP; SAMD3; C14orf80; ONECUT1; RALGPS1; PDE11A; PKIB; NINL; DBNDD1; NAGS; CDH15; CHRNB1; ZNF219; TBX3; AMOT; PRPF40B; OSGIN1; MTMR4; PNPLA3; TTC8; TRHDE; TMEM92; NOL4; RNF214; RBP5; NCAPG2; KIF22; GNAO1; ABHD8; ICA1; SHD; FOSB; FOS; MYC; JUN; PPRC1; ATF3; MAP3K8; ARID5B; KLF11; PELI1; PNRC1; ELL; KCNK1; SERTAD1; RGS2; THBS1; IER3; RALGD…
TCF3	91	2140	18.3468	1.30779	0.00386107	0.810824	0.0450458	0.0437736	BCAR3; C11orf52; RAB26; SLC25A34; EEF1A2; ONECUT1; MARVELD3; NINL; NAGS; CHRNB1; PRPF40B; GRAP; KIAA1161; ZNF385B; FCGBP; NOL4; GGT1; GCK; HNF4A; TBX15; DBI; ICA1; CHST9; COL5A3; ACSM1; FOS; MYC; GADD45G; SOCS2; PHLDA1; EPHA2; ATF3; MAP3K8; HBEGF; FILIP1L; RGS2; NR4A1; PADI4; FGF14; PROK2; CLCF1; CREB5; LYST; CDC42EP3; NR4A2; ELF3; FOXC1; NCOA7; SPSB1; NBL1; TGFB3; IER5L; GRAMD4; LIF; AKAP12; GPM…
OTX1	30	848	6.04839	1.08825	0.342072	1	0.613976	0.596636	BCAR3; GRIA3; PALMD; SPTLC3; AMOT; FANCL; NOL4; GPNMB; ICA1; TRPM8; ARID5B; KCNK1; MBNL2; NCOA7; NFKBIZ; DUSP10; GPM6B; TNFAIP6; LIPN; PDLIM3; RAX2; MTUS1; SORCS1; RPGR; PRRX1; ABCD3; LGALS8; SAMSN1; SGK1; TJP2;
PITX1	30	848	6.04839	1.08825	0.342072	1	0.613976	0.596636	BCAR3; GRIA3; PALMD; SPTLC3; AMOT; FANCL; NOL4; GPNMB; ICA1; TRPM8; ARID5B; KCNK1; MBNL2; NCOA7; NFKBIZ; DUSP10; GPM6B; TNFAIP6; LIPN; PDLIM3; RAX2; MTUS1; SORCS1; RPGR; PRRX1; ABCD3; LGALS8; SAMSN1; SGK1; TJP2;
E2F1	42	1188	8.46774	1.08742	0.306585	1	0.590774	0.574088	TYMS; GINS2; BCAR3; MARVELD3; MND1; ZNF219; PAQR4; AMOT; UBE2T; LRIG3; MYC; GADD45G; PIM1; SOCS2; FOSL2; ARID5B; ELL; APOLD1; BACH2; TUBB6; MIDN; SLC22A4; NCOA7; SPSB1; TGM2; CDKN1A; AVPR1A; SBNO2; VCAN; IRS2; MTUS1; MAPK4; PRRX1; COL1A1; HAMP; HS3ST3B1; PRKCE; RPS6KA5; SGCE; TJP2; ZFP36L2; SQLE;
EGR1	115	3215	23.1855	1.10007	0.133081	1	0.397078	0.385863	BCAR3; PDP2; ME1; UNC119; DBP; SAMD3; ONECUT1; ZNF219; PAQR4; PRPF40B; TRHDE; NOL4; SPHK2; RNF214; RBP5; GOLM1; GNAO1; COL5A3; GADD45B; JUNB; FOSB; SOCS3; FOS; MYC; JUN; GADD45G; PIM1; SOCS2; FOSL2; AGPAT9; ADAMTS1; PPRC1; EPHA2; ATF3; ARID5B; PNRC1; APOLD1; SERTAD1; RGS2; THBS1; RALGDS; NR4A1; P4HA1; PLAUR; EGR1; HIVEP1; ZFP36; C17orf96; MAFF; IVNS1ABP; KLF5; CLCF1; CREB5; EGR3; PIM3; LYST; KLF4…
NKX2-1	24	711	4.83871	1.03844	0.455154	1	0.702811	0.682962	FRMD7; ACE2; PCDH18; CXCL9; CASC5; RNF214; PPRC1; KLF6; BACH2; PROK2; CDC42EP3; MBNL2; NCOA7; RRP12; TNFAIP6; GEM; SLC7A1; COL1A2; LEPR; NFATC2; SAMSN1; SGCE; TM4SF1; SCUBE1;
NRF1	47	2037	9.47581	0.709679	0.997085	1	1	0.971757	HMMR; ZWINT; PDP2; ONECUT1; MARVELD3; SPATA18; PMS2; TMEM63A; PAQR4; FANCL; ZNF385B; SLC16A13; CASC5; NCAPG2; LRIG3; FADS2; CA12; KIF22; DBI; FOSL2; PELI1; PNRC1; THBS1; RALGDS; SPRY4; ETS2; P4HA1; PIM3; NR4A2; SLC22A4; DHODH; NFKB2; PVR; GRAMD4; MAP3K14; BAZ1A; OSM; ABCD3; AMD1; ANKRD37; DDX21; DEPTOR; DUSP6; IRF2BPL; RIPK4; WNK3; ZBTB21;
BACH1	39	648	7.8629	1.85123	0.000162984	0.0342267	0.00380296	0.00369556	BCAR3; ME1; EEF1A2; SAMD3; TMEM63A; ZNF219; MTMR4; GPNMB; ICA1; PPP1R15A; PIM1; FOSL2; ATF3; HBEGF; KLF6; FILIP1L; BCL3; SERTAD1; RGS2; ETS2; PLAUR; PADI4; PROK2; LYST; KLF4; IL1RN; GJA1; SPSB1; CDH23; LIF; TNFRSF12A; CSF3; GPR3; CIT; LAMC2; ANP32E; FABP5; SGMS2; TREM1;
HOXB4	24	718	4.83871	1.02832	0.474778	1	0.717291	0.697032	BCAR3; FABP4; PCDH18; NCAPG2; MRAP; TRPM8; MAP3K8; PELI1; ITPRIP; NR4A1; CLCF1; CREB5; GPM6B; CHI3L1; BAZ1A; NRG1; SORCS1; ABLIM1; ALOX5AP; ARAP2; COL1A2; PRKCE; SGK1; TJP2;
MEIS2	21	527	4.23387	1.22595	0.19709	1	0.473679	0.460301	GRIA3; DBP; FREM2; TBX15; PPP1R15A; CYR61; ARID5B; THBS1; AKAP12; MCAM; FRMD6; RCAN1; ABLIM1; BBOX1; COL1A2; GPR88; IFNGR1; PRKCE; RPS6KA5; SGK1; RFC1;
NR4A2	34	1042	6.85484	1.00369	0.517986	1	0.745048	0.724006	FMO1; GRIA3; SLC25A34; EEF1A2; RALGPS1; FAM13A; ACE2; GCK; MB; SHD; ATF3; KCNK1; SIK1; SPRY4; SLC2A3; CREB5; PIM3; CDC42EP3; MIDN; SLC22A4; ERN1; DUSP10; GFPT2; SERPINA1; CIT; MTUS1; SEMA4B; ABLIM1; BHLHE40; CASP7; ENO3; PLEKHA7; SAMSN1; SCUBE1;
PPARA	15	370	3.02419	1.24748	0.225599	1	0.490639	0.476782	PDP2; RTP3; SLC25A34; LRIG3; FAM47E; FOSL2; SPRY4; ZC3H12A; CREB5; MBNL2; LIF; MTUS1; ABLIM1; FKBP5; TJP2;
PPARG	65	2016	13.1048	0.991637	0.550608	1	0.760709	0.739224	RTP3; DDO; RMND1; SLC25A34; C14orf80; RALGPS1; FAM13A; PDE11A; TMEM63A; SLC22A7; ZNF219; PRKCZ; PNPLA3; KIAA1161; LRRC31; ZNF385B; PIGR; SLC25A42; GCK; TCAP; UGT1A6; HNF4A; SYT7; FAM47E; MRAP; C15orf52; MAP3K8; HBEGF; BCL3; ITPRIP; SPRY4; IVNS1ABP; CREB5; RRS1; LYST; IL1B; NR4A3; NR4A2; MBNL2; SLC22A4; MMP19; CDH23; GRAMD4; LIF; GPM6B; EIF5; ADAMTS4; TAGLN; SERPINA1; MCAM; SBNO2; SLC7A1; PMP22; P…
HSF1	33	806	6.65323	1.25942	0.102356	1	0.326338	0.317121	RTP3; PALMD; KBTBD3; SLC12A1; FAM13A; FAM168A; ACE2; ZNF385B; SLC22A11; MRAP; TRPM8; FOSB; FOS; NFIL3; THBS1; FOXO1; ETS2; SIPA1L2; KLF5; CREB5; EGR3; NR4A3; RASL10A; MBNL2; SPSB1; NFKBIZ; NBL1; IER5L; AKAP12; NRG1; ABLIM1; MXD1; TSLP;
ETV7	31	1049	6.25	0.909049	0.738055	1	0.901114	0.875664	THAP2; MANBAL; SAMD3; SLC12A1; TMEM63A; MTMR4; CENPQ; FREM2; GGT1; RNF214; JUNB; CCL2; HBEGF; RGS1; ETNK1; TRIM15; NR4A2; IL1RN; NCOA7; PPAN; FCAR; CDH23; ADAMTS4; SBNO2; TMPRSS2; IRF1; AMD1; CTSS; SRGN; TJP2; SCUBE1;
NR5A2	18	486	3.62903	1.13955	0.318734	1	0.592337	0.575608	CYP7A1; TRIM14; SAMD3; FAM13A; NAGS; SLC16A13; ANXA13; KANK4; NFIL3; SIPA1L2; CREB5; CDC42EP3; MIDN; URB2; NRG1; GFRA3; RPS6KA5; SRGN;
TEAD1	17	422	3.42742	1.2395	0.214698	1	0.484803	0.471111	BCAR3; SIRT4; KANK4; EPHA2; THBS1; CLCF1; CDC42EP3; ELF3; NBL1; TGFB3; TNFRSF12A; XKR4; EIF5; PMP22; PAPPA; LAMC2; MLIP;
TFAP2A	15	258	3.02419	1.789	0.0218427	1	0.138999	0.135073	FREM2; STMN2; JUNB; HBEGF; KLF6; BCL3; SPRY4; NR4A1; CREB5; PIM3; ADAMTS4; VCAN; ABLIM1; BHLHE40; NCAM2;
ARNT	17	403	3.42742	1.29794	0.165687	1	0.457819	0.444888	TMEM169; SLC29A1; FAM13A; ANXA13; LRIG3; PIM1; PPRC1; KLF6; RALGDS; MAFF; FGF14; GPM6B; BATF3; FLNC; AMD1; FKBP5; WNK3;
BARX1	12	382	2.41935	0.966793	0.590272	1	0.784606	0.762446	SAMD3; FABP4; AGPAT9; KCNK1; BACH2; SIPA1L2; IVNS1ABP; CREB5; GJA1; RPGR; MXD1; SAMSN1;
BSX	10	268	2.01613	1.14855	0.374067	1	0.623444	0.605836	ACBD5; BACH2; SIPA1L2; PROK2; CDC42EP3; MBNL2; MTUS1; ANP32E; MXD1; SAMSN1;
DMBX1	14	368	2.82258	1.17069	0.311729	1	0.590774	0.574088	IFIT2; SLC12A1; ACE2; ARID5B; ZC3H12A; MBNL2; SLC7A1; RPGR; PRRX1; ACKR3; FKBP5; PRKCE; SAMSN1; SGCE;
GSC	13	379	2.62097	1.05558	0.46211	1	0.708343	0.688337	BCAR3; SLC12A1; SPATA18; PNPLA3; FANCL; CDH19; ETNK1; SLC22A4; SLC7A2; TEAD4; ABCD3; COL1A2; WNK3;
HNF4A	117	3015	23.5887	1.19344	0.0186873	1	0.126591	0.123016	BCAR3; TBX10; GRIA3; RTP3; FBXO2; RMND1; THAP2; MANBAL; SLC29A1; SLC25A34; SAMD3; C14orf80; RALGPS1; FAM13A; ANKS4B; TMEM63A; SLC22A7; ZNF219; AMOT; GSTCD; PNPLA3; KIAA1161; PCDH18; HTR2B; FREM2; TMEM92; FCGBP; GGT1; SLC25A42; RNF214; UGT1A6; FAM47E; C2orf82; C15orf52; KANK4; TRPM8; MYC; PIM1; SOCS2; FOSL2; AGPAT9; FAM107A; PHLDA1; CYR61; ATF3; HBEGF; PELI1; ITPRIP; THBS1; RALGDS; SPRY4; ZC3H12A;…
HOXA3	24	573	4.83871	1.28853	0.123223	1	0.380542	0.369794	RNF43; ASPM; AMOT; FANCL; PCDH18; ZNF385B; ACBD5; MYC; PPRC1; NFIL3; PELI1; CREB5; NR4A3; MBNL2; RAB27A; HDC; GPM6B; EIF5; NRG1; MTUS1; RCAN1; ARAP2; LEPR; SGK1;
HOXB3	8	335	1.6129	0.735258	0.856964	1	0.980226	0.952542	RNF43; ICA1; SIPA1L2; IVNS1ABP; CREB5; CDC42EP3; MTUS1; COL1A2;
HOXD8	32	811	6.45161	1.21374	0.148667	1	0.427671	0.415592	KRT222; FAM13A; PRPF40B; AFP; PCDH18; ZNF385B; PIGR; ANXA13; SLC5A12; LRRC19; TRPM8; PIM1; MAP3K8; LYST; MBNL2; NR5A2; ERN1; CHI3L1; BAZ1A; ALDH1A3; NRG1; CIT; SORCS1; ABLIM1; ALOX5AP; COL1A2; MLIP; SAMSN1; SGCE; TJP2; TSPAN8; UGT2A3;
ONECUT1	21	564	4.23387	1.14552	0.291933	1	0.582649	0.566193	DDO; CNTNAP2; ZNF385B; HNF4A; LRRC19; ARID5B; SIK1; ETS2; IVNS1ABP; KLF5; PROK2; CREB5; NR4A3; SYNE2; RAC1; PRRX1; COL1A2; DEPTOR; PRKCE; SELL; WNK3;
PAX7	16	467	3.22581	1.05422	0.451506	1	0.702343	0.682507	BCAR3; FANCL; TTC8; PCDH18; ZNF385B; LRIG3; GNAO1; MAP3K8; FILIP1L; ETNK1; CREB5; CDC42EP3; GPM6B; BAZ1A; SORCS1; ABLIM1;
POU4F3	24	687	4.83871	1.07472	0.38805	1	0.63171	0.613868	FMO1; BCAR3; SAMD3; FABP4; TTC8; ZNF385B; PIGR; CASC5; TRPM8; ATF3; SIPA1L2; CREB5; NCOA7; HDC; BAZ1A; CIT; MTUS1; SORCS1; COL1A2; DUSP6; LEPR; MLIP; SAMSN1; TJP2;
PRRX2	23	597	4.6371	1.18522	0.228784	1	0.490639	0.476782	PALMD; FANCL; PCDH18; FREM2; NOL4; TRPM8; PELI1; KCNK1; P4HA1; SIPA1L2; HAS2; CREB5; NR4A2; MBNL2; RAB27A; GPM6B; NRG1; MTUS1; SORCS1; ABLIM1; ARAP2; COL1A2; MXD1;
VAX2	13	434	2.62097	0.921813	0.658908	1	0.843724	0.819894	PCDH18; GGT1; TRPM8; CREB5; GPM6B; BAZ1A; NRG1; SORCS1; ALOX5AP; COL1A2; DUSP6; SGMS2; NCAM2;
VSX2	21	595	4.23387	1.08584	0.381022	1	0.630037	0.612243	RNF43; FRAT1; PKIB; AMOT; FANCL; PCDH18; ZNF385B; MYC; NFIL3; ITPRIP; HIVEP1; SIPA1L2; IVNS1ABP; RAB27A; GPM6B; EIF5; RAC1; MTUS1; RCAN1; COL1A2; STK17A;
CUX1	17	350	3.42742	1.49448	0.0655911	1	0.270081	0.262453	PDE11A; ZNF385B; ARID5B; FILIP1L; CDH19; NR4A2; BAZ1A; TNFAIP8L3; SLC7A1; NRG1; MTUS1; PRRX1; ABLIM1; FABP5; FKBP5; SGCE; TSPAN8;
CACD	17	514	3.42742	1.01765	0.506863	1	0.734077	0.713345	SLC29A1; FCGBP; ACBD5; ARID5B; APOLD1; FOSL1; EGR3; NR4A3; NBL1; MTHFD2; OSM; RAC1; PMP22; LAMC2; AMD1; COL1A2; HS3ST3B1;
HOXB13	17	526	3.42742	0.994433	0.545885	1	0.760709	0.739224	FANCL; ZNF385B; JAKMIP2; TBX15; STMN2; MYC; FGF14; CREB5; NR4A3; GPM6B; PMP22; VIL1; PRRX1; DEFB118; AMD1; COL1A2; PRKCE;
ZNF238	36	799	7.25806	1.38591	0.0298848	1	0.162591	0.157999	SLC29A1; TLR7; SAMD3; ONECUT1; RALGPS1; ZNF385B; PIGR; SOCS3; FOSL2; PPRC1; ATF3; ARID5B; ELL; EMP1; IGFBP1; FGF14; KLF5; PROK2; NR4A2; IL1RN; SPSB1; MMP19; NBL1; TGFB3; GRAMD4; TNFAIP8L3; ALDH1A3; MTUS1; PRRX1; GFRA3; DEPTOR; HS3ST3B1; PRKCE; SLC3A1; TDO2; TJP2;
ZNF513	36	799	7.25806	1.38591	0.0298848	1	0.162591	0.157999	SLC29A1; TLR7; SAMD3; ONECUT1; RALGPS1; ZNF385B; PIGR; SOCS3; FOSL2; PPRC1; ATF3; ARID5B; ELL; EMP1; IGFBP1; FGF14; KLF5; PROK2; NR4A2; IL1RN; SPSB1; MMP19; NBL1; TGFB3; GRAMD4; TNFAIP8L3; ALDH1A3; MTUS1; PRRX1; GFRA3; DEPTOR; HS3ST3B1; PRKCE; SLC3A1; TDO2; TJP2;
MYC	45	1086	9.07258	1.2745	0.0552144	1	0.241563	0.23474	TMEM169; PDP2; RMND1; SLC29A1; FAM13A; ZNF385B; SLC16A13; LRIG3; GADD45G; PIM1; PPRC1; NFIL3; HBEGF; NR4A1; PFKFB3; C17orf96; FGF14; IRAK3; CREB5; EGR3; PIM3; KLF4; NR4A2; RND1; MIDN; ELF3; GJA1; URB2; AKAP12; GPM6B; BATF3; GEM; KCNE4; OSM; MTUS1; C2CD4A; FLNC; COL1A2; DDX21; ENO3; FKBP5; MLIP; MXD1; YPEL2; CHAC1;
MYF5	67	1856	13.5081	1.11026	0.194137	1	0.473679	0.460301	FMO1; BCAR3; RAB26; SLC29A1; EEF1A2; MARVELD3; PDE11A; NINL; ZNF219; PRKCZ; AMOT; GRAP; KIAA1161; FCGBP; NOL4; SLC22A11; GCK; RBP5; NCAPG2; TBX15; ICA1; ACSM1; MYC; GADD45G; SOCS2; PHLDA1; EPHA2; ATF3; HBEGF; ITPRIP; ELL; NR4A1; FGF14; PROK2; CLCF1; CREB5; LARP1B; CDC42EP3; MYADM; PPAN; LIF; AKAP12; MAP3K14; GPM6B; XKR4; CNN1; CD274; SLC7A1; NRG1; RCAN1; ABCD3; ABLIM1; COL1A2; ENO3; ENPP2; FAM20A…
FOXD1	18	334	3.62903	1.65813	0.0254192	1	0.157001	0.152567	RNF43; CYP7A1; FAM13A; LRRC31; FAM107A; ARID5B; NR4A1; KLF4; MBNL2; NR5A2; PTGER2; TGFB3; SLC7A2; CDKN1A; PAPPA; MXD1; SGMS2; TSPAN8;
POU6F1	20	655	4.03226	0.93943	0.647218	1	0.835319	0.811727	PCDH18; NOL4; TBX15; ATF3; ARID5B; ITPRIP; HIVEP1; KLF5; CREB5; MBNL2; GPR3; MAPK4; PRRX1; DUSP6; SAMSN1; SGCE; SGK1; SGMS2; TJP2; TMEM154;
ASCL2	54	1499	10.8871	1.10799	0.23018	1	0.490639	0.476782	GRIA3; SLC29A1; UNC119; FAM13A; DBNDD1; TBX3; MTMR4; KIAA1161; FCGBP; GGT1; SLC22A11; RNF214; JAKMIP2; HNF4A; ABHD8; C15orf52; SOCS3; MYC; JUN; FOSL2; ADAMTS1; ATF3; FILIP1L; SPRY4; BACH2; EMP1; PADI4; HAS2; CREB5; NR4A3; CDC42EP3; CALCA; MT1A; MMP19; STC1; LIF; DUSP10; GFPT2; AVPR1A; GEM; ALDH1A3; RCAN1; ABLIM1; ALOX5AP; DEPTOR; ENO3; FAM20A; FKBP5; GPR88; HS3ST3B1; PLEKHA7; PRKCE; SGCE; SGK1;
BARHL1	15	509	3.02419	0.906817	0.689314	1	0.861642	0.837307	KRT222; FRMD7; FABP4; PCDH18; GOLM1; ICA1; MYC; KLF5; CLCF1; CREB5; NRG1; MTUS1; DUSP6; SAMSN1; SGMS2;
ESRRA	29	917	5.84677	0.972834	0.590323	1	0.784606	0.762446	GRIA3; SLC12A1; FAM13A; AMOT; ZNF385B; SLC22A11; RNF214; MB; C15orf52; SHD; PIM1; KCNK1; CREB5; MIDN; SLC22A4; GJA1; DUSP10; SLC7A1; PMP22; NRG1; PAPPA; CIT; LAMC2; ABLIM1; ENO3; FAM20A; SAMSN1; SGK1; SCUBE1;
GBX1	4	199	0.806452	0.619633	0.891683	1	0.996029	0.967898	GNAO1; SIPA1L2; AMD1; SGK1;
GBX2	12	302	2.41935	1.22289	0.279422	1	0.575281	0.559033	KIAA1161; FANCL; TTC8; ZNF385B; GOLM1; GNAO1; PELI1; SIPA1L2; CREB5; NR4A2; RAB27A; MTUS1;
LHX4	18	392	3.62903	1.4128	0.0898281	1	0.318244	0.309255	GRIA3; FAM13A; ZNF219; KIAA1161; GOLM1; LRIG3; GNAO1; FILIP1L; PELI1; APOLD1; BACH2; NR4A3; RAB27A; GJA1; RCAN1; ABLIM1; BBOX1; SGMS2;
POU3F4	14	366	2.82258	1.17709	0.304731	1	0.590774	0.574088	CNTNAP2; ACBD5; TRPM8; CREB5; LYST; HDC; SPSB1; CDKN1A; GPM6B; BAZ1A; SORCS1; COL1A2; SGCE; TJP2;
TCF12	49	1099	9.87903	1.37135	0.014963	1	0.108353	0.105293	BCAR3; KRT222; RAB26; FRMD7; TMEM63A; CDH15; ZNF219; PRPF40B; MAMDC4; NOL4; ANXA13; HNF4A; GOLM1; GNAO1; ABHD8; C15orf52; KANK4; SHD; GADD45G; HBEGF; BCL3; ITPRIP; KCNK1; SPRY4; HIVEP1; TNFRSF1A; CREB5; KLF4; MYADM; ACTG2; PPAN; CDH23; TGFB3; TGM2; LIF; MYBPH; GFPT2; S100A8; ADAMTS4; SERPINA1; PMP22; RCAN1; ABLIM1; GPR88; MLIP; SGMS2; SCUBE1; CHAC1; GSTT1;
ELF2	37	780	7.45968	1.4591	0.0137744	1	0.103308	0.10039	GRIA3; DBP; SAMD3; C2orf54; ZNF385B; GGT1; GCK; HNF4A; JUNB; EPHA2; CCL2; HBEGF; ELL; THBS1; ETNK1; FOSL1; PFKFB3; EMP1; PADI4; RBPMS; EGR3; NR4A2; TUBB6; SLC11A1; NCOA7; MMP19; ADAMTS4; MYH11; TMPRSS2; NRG1; IRF1; FLNC; LAMC2; AMD1; S100A9; SGMS2; UNC93A;
ESR1	29	696	5.84677	1.28173	0.102563	1	0.326338	0.317121	BCAR3; FBXO2; RALGPS1; FAM13A; PCDH18; PIGR; SLC16A13; HNF4A; SYT7; IP6K3; GADD45G; THBS1; SPRY4; NR4A1; CDC42EP3; LPAR1; NFKB2; TNFRSF12A; TNFAIP6; ADAMTS4; TNFAIP8L3; GPR3; MCAM; PMP22; ROM1; VIL1; BHLHE40; COL1A1; DEPTOR;
FOS	84	1754	16.9355	1.47287	0.000161281	0.0338691	0.00380296	0.00369556	GRIA3; FBXO2; THAP2; ME1; MANBAL; SAMD3; RALGPS1; ZNF219; AMOT; PRPF40B; OSGIN1; CD3G; FABP4; ZNF385B; GGT1; GPNMB; TBX15; ICA1; COL5A3; TRPM8; GADD45B; PPP1R15A; PIM1; ADAMTS1; ATF3; MAP3K8; HBEGF; KLF6; FILIP1L; BCL3; ELL; RGS2; ZC3H12A; BACH2; ETS2; PLAUR; IL6; FOSL1; PFKFB3; PADI4; CLCF1; CREB5; LYST; NR4A2; RND1; MIDN; IL1RN; GJA1; NCOA7; TNFSF14; SPSB1; MMP19; CDH23; LIF; MYBPH; TNFRSF12A; …
FOSB	84	1754	16.9355	1.47287	0.000161281	0.0338691	0.00380296	0.00369556	GRIA3; FBXO2; THAP2; ME1; MANBAL; SAMD3; RALGPS1; ZNF219; AMOT; PRPF40B; OSGIN1; CD3G; FABP4; ZNF385B; GGT1; GPNMB; TBX15; ICA1; COL5A3; TRPM8; GADD45B; PPP1R15A; PIM1; ADAMTS1; ATF3; MAP3K8; HBEGF; KLF6; FILIP1L; BCL3; ELL; RGS2; ZC3H12A; BACH2; ETS2; PLAUR; IL6; FOSL1; PFKFB3; PADI4; CLCF1; CREB5; LYST; NR4A2; RND1; MIDN; IL1RN; GJA1; NCOA7; TNFSF14; SPSB1; MMP19; CDH23; LIF; MYBPH; TNFRSF12A; …
JUN	84	1754	16.9355	1.47287	0.000161281	0.0338691	0.00380296	0.00369556	GRIA3; FBXO2; THAP2; ME1; MANBAL; SAMD3; RALGPS1; ZNF219; AMOT; PRPF40B; OSGIN1; CD3G; FABP4; ZNF385B; GGT1; GPNMB; TBX15; ICA1; COL5A3; TRPM8; GADD45B; PPP1R15A; PIM1; ADAMTS1; ATF3; MAP3K8; HBEGF; KLF6; FILIP1L; BCL3; ELL; RGS2; ZC3H12A; BACH2; ETS2; PLAUR; IL6; FOSL1; PFKFB3; PADI4; CLCF1; CREB5; LYST; NR4A2; RND1; MIDN; IL1RN; GJA1; NCOA7; TNFSF14; SPSB1; MMP19; CDH23; LIF; MYBPH; TNFRSF12A; …
JUNB	84	1754	16.9355	1.47287	0.000161281	0.0338691	0.00380296	0.00369556	GRIA3; FBXO2; THAP2; ME1; MANBAL; SAMD3; RALGPS1; ZNF219; AMOT; PRPF40B; OSGIN1; CD3G; FABP4; ZNF385B; GGT1; GPNMB; TBX15; ICA1; COL5A3; TRPM8; GADD45B; PPP1R15A; PIM1; ADAMTS1; ATF3; MAP3K8; HBEGF; KLF6; FILIP1L; BCL3; ELL; RGS2; ZC3H12A; BACH2; ETS2; PLAUR; IL6; FOSL1; PFKFB3; PADI4; CLCF1; CREB5; LYST; NR4A2; RND1; MIDN; IL1RN; GJA1; NCOA7; TNFSF14; SPSB1; MMP19; CDH23; LIF; MYBPH; TNFRSF12A; …
JUND	84	1754	16.9355	1.47287	0.000161281	0.0338691	0.00380296	0.00369556	GRIA3; FBXO2; THAP2; ME1; MANBAL; SAMD3; RALGPS1; ZNF219; AMOT; PRPF40B; OSGIN1; CD3G; FABP4; ZNF385B; GGT1; GPNMB; TBX15; ICA1; COL5A3; TRPM8; GADD45B; PPP1R15A; PIM1; ADAMTS1; ATF3; MAP3K8; HBEGF; KLF6; FILIP1L; BCL3; ELL; RGS2; ZC3H12A; BACH2; ETS2; PLAUR; IL6; FOSL1; PFKFB3; PADI4; CLCF1; CREB5; LYST; NR4A2; RND1; MIDN; IL1RN; GJA1; NCOA7; TNFSF14; SPSB1; MMP19; CDH23; LIF; MYBPH; TNFRSF12A; …
NR6A1	28	769	5.64516	1.12007	0.294099	1	0.582649	0.566193	RNF43; C11orf52; PALMD; ONECUT1; PDE11A; MTMR4; AFP; MRAP; SHD; JUN; NFIL3; FOXO1; IL1RL1; CREB5; NFE2; MBNL2; MIDN; SPSB1; IL18RAP; BATF3; SERPINA1; LAMC2; RCAN1; ABLIM1; RGCC; RPS6KA5; TJP2; TM4SF1;
RAB40B	29	806	5.84677	1.10681	0.312266	1	0.590774	0.574088	SLC25A34; RALGPS1; FAM13A; GPAM; SLC22A7; ZNF219; PRKCZ; ACE2; TMEM92; GCK; RNF214; JAKMIP2; PIM1; PELI1; KCNK1; SPRY4; SLC22A4; ERN1; GFPT2; SERPINA1; CD274; NRG1; ABLIM1; ENO3; FAM20A; IRF2BPL; SGK1; TSLP; SCUBE1;
RARA	29	806	5.84677	1.10681	0.312266	1	0.590774	0.574088	SLC25A34; RALGPS1; FAM13A; GPAM; SLC22A7; ZNF219; PRKCZ; ACE2; TMEM92; GCK; RNF214; JAKMIP2; PIM1; PELI1; KCNK1; SPRY4; SLC22A4; ERN1; GFPT2; SERPINA1; CD274; NRG1; ABLIM1; ENO3; FAM20A; IRF2BPL; SGK1; TSLP; SCUBE1;
SPI1	23	814	4.6371	0.869265	0.787157	1	0.945479	0.918776	BCAR3; LGALS4; TLR7; SPTLC3; EMP1; SIPA1L2; MAFF; CREB5; NR4A3; MYADM; MBNL2; CDKN1A; BIRC3; MYH11; SBNO2; IRF1; BCL2A1; ALOX5AP; CTSS; MCL1; SAMSN1; TJP2; TSPAN13;
BARX2	7	296	1.41129	0.728244	0.851321	1	0.980226	0.952542	SAMD3; PCDH18; ZNF385B; CREB5; BAZ1A; COL1A2; TJP2;
DBX2	10	408	2.01613	0.754446	0.858865	1	0.980226	0.952542	TRPM8; CEBPD; CREB5; BAZ1A; SORCS1; ABLIM1; COL1A2; MLIP; SGCE; TJP2;
EN1	23	466	4.6371	1.5184	0.0313489	1	0.162591	0.157999	KRT222; FRMD7; FABP4; PCDH18; NOL4; GOLM1; MAP3K8; FILIP1L; PELI1; KLF5; CREB5; LYST; GJA1; HDC; GPM6B; MTUS1; SORCS1; COL1A2; CXCR2; ELL2; MLIP; TJP2; NCAM2;
FOXC1	9	301	1.81452	0.920469	0.648366	1	0.835319	0.811727	FAM13A; GNAO1; FOSL2; ARID5B; MAFF; PAPPA; RGCC; RIPK4; YPEL2;
HOXA5	26	916	5.24194	0.873183	0.792581	1	0.945479	0.918776	SKP2; FABP4; FANCL; PCDH18; FREM2; PROL1; ACBD5; FAM107A; KLF6; FILIP1L; BACH2; KLF5; CREB5; CDC42EP3; MBNL2; GJA1; GPM6B; EIF5; MTUS1; RCAN1; PRRX1; ABLIM1; AMD1; RGCC; SAMSN1; SGCE;
HOXA7	21	527	4.23387	1.22595	0.19709	1	0.473679	0.460301	BCAR3; FRAT1; PALMD; FABP4; AFP; TRPM8; KLF6; PELI1; NR4A1; ETNK1; LYST; GPM6B; CHI3L1; BAZ1A; PRRX1; ABLIM1; ALOX5AP; ARAP2; COL1A2; TJP2; TSPAN8;
HOXB6	8	123	1.6129	2.00243	0.0474766	1	0.221557	0.2153	NOL4; FOSB; BACH2; CREB5; CDC42EP3; GRHL1; ALOX5AP; SGCE;
HOXB7	16	388	3.22581	1.26886	0.197665	1	0.473679	0.460301	SAMD3; ACE2; AFP; NOL4; TRPM8; ETS2; HDC; LPAR1; CHI3L1; BAZ1A; NRG1; SORCS1; ALOX5AP; COL1A2; HPGD; TJP2;
HOXB8	10	225	2.01613	1.36804	0.198494	1	0.473679	0.460301	BCAR3; PCDH18; ICA1; CREB5; GJA1; NCOA7; CDH23; BAZ1A; COL1A2; NCAM2;
HOXC6	11	237	2.21774	1.42852	0.150948	1	0.428365	0.416266	KRT222; CNTNAP2; ACBD5; TRPM8; MBNL2; BAZ1A; SORCS1; ARAP2; COL1A2; HPGD; RGCC;
ISX	10	265	2.01613	1.16155	0.360977	1	0.621354	0.603805	SKP2; FABP4; FANCL; TTC8; LRIG3; GNAO1; PPRC1; CDC42EP3; NR4A2; ELL2;
LHX8	5	223	1.00806	0.690842	0.85504	1	0.980226	0.952542	GRIA3; LRIG3; GNAO1; RAB27A; ELL2;
MNX1	10	311	2.01613	0.989748	0.559827	1	0.76839	0.746688	PALMD; FANCL; TTC8; GNAO1; KLF6; LPAR1; BAZ1A; COL1A2; HPGD; SGMS2;
MSX1	11	234	2.21774	1.44683	0.142107	1	0.414479	0.402773	PCDH18; ICA1; EGR1; KLF5; CREB5; GPM6B; BAZ1A; NRG1; SORCS1; COL1A2; TJP2;
NKX1-1	1	146	0.201613	0.212718	0.992172	1	1	0.971757	COL1A2;
PAX6	19	557	3.83065	1.0495	0.448596	1	0.702343	0.682507	PCDH18; TRPM8; FGF14; CREB5; LYST; CDC42EP3; MBNL2; NCOA7; BAZ1A; OSM; NRG1; SORCS1; ABLIM1; COL1A2; CTSS; CXCR2; LECT2; SGCE; TJP2;
PBX1	31	741	6.25	1.28689	0.0903508	1	0.318244	0.309255	KRT222; GRIA3; DDO; EEF1A2; EDAR; ZNF385B; RBP5; LRIG3; GNAO1; CHST9; TRPM8; BACH2; SIPA1L2; CREB5; KLF4; NR4A3; NR4A2; MBNL2; GJA1; LIF; DUSP10; LIPN; CD274; PAPPA; MAPK4; ABCD3; ABLIM1; COL1A2; RPS6KA5; WNK3; NCAM2;
PKNOX1	4	95	0.806452	1.2979	0.373103	1	0.623444	0.605836	RBP5; GNAO1; BACH2; CD274;
POU5F1	13	373	2.62097	1.07256	0.439188	1	0.693455	0.67387	GRIA3; ONECUT1; ZNF385B; LRIG3; STMN2; GADD45G; MAP3K8; ARID5B; KLF5; GJA1; SYNE2; TNFAIP6; MTUS1;
PRRX1	19	389	3.83065	1.50275	0.0515097	1	0.234742	0.228112	AMOT; FABP4; FANCL; PCDH18; ZNF385B; NOL4; GOLM1; ACBD5; MAP3K8; NFIL3; PELI1; ITPRIP; KLF5; CREB5; RAB27A; GPM6B; ABLIM1; COL1A2; PRKCE;
REST	23	765	4.6371	0.924942	0.682434	1	0.861642	0.837307	ANKRD29; PAQR4; CNTNAP2; PCDH18; GGT1; COL5A3; STMN2; ARID5B; RALGDS; SPRY4; BACH2; NR4A1; EGR3; CDC42EP3; NR4A2; ARL14; CDH23; VIL1; IRF2BPL; OSGIN2; SGK1; SGMS2; SPP1;
SOX1	12	276	2.41935	1.33808	0.189489	1	0.473679	0.460301	FRAT1; LRIG3; GNAO1; GADD45G; CYR61; ARID5B; NR4A1; STC1; SYNE2; BAZ1A; DUSP6; MXD1;
TGIF1	31	1034	6.25	0.922236	0.708982	1	0.880983	0.856101	FMO1; GRIA3; SLC29A1; DBP; SLC12A1; TLR3; PRPF40B; FREM2; COL5A3; PIM1; FAM107A; ELL; NAMPT; C17orf96; MBNL2; NCOA7; CIT; CCL20; RCAN1; GFRA3; ABLIM1; BBOX1; IFNGR1; MLIP; PRKCE; SGK1; SGMS2; TJP2; TSPAN13; SQLE; RFC1;
CRX	11	349	2.21774	0.970096	0.585395	1	0.784606	0.762446	ZNF385B; TRHDE; GNAO1; EPHA2; CDH19; ETS2; CLCF1; AKAP12; IRF1; RPGR; ACKR3;
ESR2	20	464	4.03226	1.32613	0.122608	1	0.380542	0.369794	FAM13A; SPTLC3; GPAM; ZNF219; MTMR4; UBE2T; KANK4; IP6K3; TRPM8; RALGDS; SPRY4; UPP1; NR4A3; LPAR1; NFKB2; TNFAIP8L3; PMP22; LAMC2; FKBP5; NUDT13;
GLI1	5	148	1.00806	1.04091	0.529195	1	0.75594	0.73459	GNAO1; PIM1; ADAMTS1; SLC22A4; MTUS1;
HENMT1	43	1144	8.66935	1.15612	0.178124	1	0.467577	0.454371	BCAR3; GRIA3; RAB26; SLC29A1; UNC119; RALGPS1; FAM13A; TBX3; PRKCZ; AMOT; PRPF40B; MTMR4; GRAP; FCGBP; GGT1; RNF214; RBP5; COL5A3; C15orf52; MYC; FOSL2; FAM107A; CCL2; FILIP1L; BCL3; ELL; EMP1; NR4A3; CDC42EP3; NR4A2; CDH23; IER5L; LIF; SLC7A2; DUSP10; MCAM; ALDH1A3; FLNC; VIL1; ABLIM1; CXCR2; FKBP5; IRF2BPL;
INSM1	12	487	2.41935	0.758351	0.872859	1	0.985732	0.957892	NAGS; NOL4; NR4A3; TNFRSF12A; GPR3; EFHD1; CIT; FLNC; BBOX1; COL1A2; MXD1; SGCE;
NHLH1	43	1144	8.66935	1.15612	0.178124	1	0.467577	0.454371	BCAR3; GRIA3; RAB26; SLC29A1; UNC119; RALGPS1; FAM13A; TBX3; PRKCZ; AMOT; PRPF40B; MTMR4; GRAP; FCGBP; GGT1; RNF214; RBP5; COL5A3; C15orf52; MYC; FOSL2; FAM107A; CCL2; FILIP1L; BCL3; ELL; EMP1; NR4A3; CDC42EP3; NR4A2; CDH23; IER5L; LIF; SLC7A2; DUSP10; MCAM; ALDH1A3; FLNC; VIL1; ABLIM1; CXCR2; FKBP5; IRF2BPL;
NR1H4	2	62	0.403226	0.99678	0.603398	1	0.796941	0.774433	GRIA3; BHLHE40;
ZEB1	23	401	4.6371	1.76452	0.00624278	1	0.0595902	0.0579072	PDE11A; CHRNB1; MTMR4; PIGR; TRHDE; HNF4A; GADD45B; JUN; THBS1; SIPA1L2; EGR3; NFE2; NR4A2; GPM6B; MTUS1; MAPK4; ABLIM1; ARAP2; BBOX1; PLEKHA7; RIPK4; RNF125; TJP2;
ZFP161	47	1137	9.47581	1.27143	0.0525375	1	0.234742	0.228112	BCAR3; ASPM; PDP2; ZNF219; TBX3; CNTNAP2; TMEM98; UBE2T; NOL4; LRIG3; FADS2; TBX15; ICA1; GADD45B; SOCS3; FOS; JUN; FOSL2; ADAMTS1; EPHA2; ITPRIP; ELL; RALGDS; BACH2; ETS2; EGR1; PFKFB3; ZFP36; EGR3; KLF4; SLC22A4; LPAR1; GRHL1; XKR4; EIF5; MTHFD2; NRG1; CIT; GFRA3; BHLHE40; HPGD; PRKCE; RIPK4; RPS6KA5; TJP2; WNK3; ZFP36L2;
BACH2	40	628	8.06452	1.95915	3.92878e-05	0.00825044	0.00275015	0.00267247	BCAR3; EEF1A2; SAMD3; TMEM63A; PITPNM2; OSGIN1; MTMR4; ICA1; COL5A3; GADD45B; PIM1; AGPAT9; ATF3; MAP3K8; HBEGF; KLF6; ELL; SERTAD1; PLAUR; PADI4; PROK2; KLF4; NR4A3; MYADM; MIDN; SPSB1; CDH23; PVR; GRAMD4; LIF; TNFRSF12A; CDKN1A; EIF5; SERPINA1; GPR3; LAMC2; ABLIM1; ANP32E; NUDT13; RIPK4;
EBF1	10	205	2.01613	1.5015	0.132335	1	0.397078	0.385863	PALMD; PRKCZ; ICA1; C15orf52; CYR61; BCL3; EGR1; ARL14; ROM1; PLIN1;
HOXA13	15	309	3.02419	1.49373	0.0804016	1	0.301183	0.292677	ZNF385B; USP18; ICA1; LRRC19; MAP3K8; ELL; RGS1; APOLD1; CREB5; NR4A3; GJA1; VIL1; FAM20A; TSLP; SCUBE1;
MSX2	14	344	2.82258	1.25237	0.231301	1	0.490639	0.476782	ZNF219; AMOT; KIAA1161; ZNF385B; GOLM1; ICA1; APOLD1; RAB27A; GPM6B; SORCS1; RPGR; PRRX1; DUSP6; MCL1;
NOBOX	23	621	4.6371	1.13942	0.289002	1	0.582649	0.566193	BCAR3; RNF43; FRMD7; PCDH18; CXCL9; ZNF385B; LRIG3; ICA1; APOLD1; KLF5; CLCF1; CREB5; AVPR1A; GPM6B; NRG1; MTUS1; ABLIM1; ARAP2; DUSP6; ERAP2; MCL1; PRKCE; NCAM2;
TFAP4	50	1280	10.0806	1.20146	0.0995351	1	0.326338	0.317121	BCAR3; RNF43; DDO; RALGPS1; PDE11A; NINL; ZNF219; ZNF385B; NOL4; ANXA13; HNF4A; GPNMB; TBX15; GNAO1; ICA1; SHD; MYC; JUN; FOSL2; ATF3; KLF6; SPRY4; BACH2; SOCS1; KLF4; FPR1; CDC42EP3; MBNL2; ELF3; NCOA7; RRP12; CDH23; STC1; MYBPH; ODF3L1; DUSP10; GEM; S100A8; ADAMTS4; MCAM; RCAN1; COL1A1; FKBP5; GPR88; MLIP; NFATC2; PRKCE; TJP2; TSPAN8; CHAC1;
ATF3	41	800	8.26613	1.57637	0.00266058	0.558722	0.0349201	0.0339338	RNF43; FAM13A; PRKCZ; PIGR; NOL4; SPHK2; RBP5; MB; IP6K3; FOSB; FOS; JUN; FOSL2; EPHA2; KLF11; KLF6; PNRC1; ITPRIP; ELL; RGS2; BACH2; HIVEP1; MAFF; RBPMS; CREB5; MBNL2; TGFB3; ODF3L1; CDKN1A; DUSP10; GPM6B; GEM; XKR4; TAGLN; GPR3; MCAM; PDLIM3; GFRA3; IRF2BPL; MXD1; ZBTB21;
TAL1	38	1113	7.66129	1.05018	0.400714	1	0.646768	0.628501	LRRC20; RNF43; DDO; SLC25A34; FRMD7; GPAM; ANXA9; SPHK2; MB; SHD; TRPM8; JUN; EPHA2; KLF6; SPRY4; BACH2; IVNS1ABP; FGF14; KLF5; CREB5; CDC42EP3; PTGER2; NBL1; CDH23; LIF; MYBPH; GEM; XKR4; RAC1; SORCS1; LAMC2; ABLIM1; CXCR2; HS3ST3B1; MLIP; MXD1; TSLP; SCUBE1;
HOXA9	24	729	4.83871	1.0128	0.505473	1	0.734077	0.713345	IFIT3; FANCL; ZNF385B; RNF214; HNF4A; STMN2; JUN; PTGS2; KLF5; CREB5; LYST; IL1B; NR4A3; MBNL2; NCOA7; STC1; SOX17; NRG1; PAPPA; MTUS1; ANKRD37; COL1A2; SGCE; NCAM2;
NFE2	30	518	6.04839	1.78153	0.0016695	0.350595	0.0250425	0.0243352	ME1; EEF1A2; CCL14; PRKCZ; OSGIN1; CD3G; COL5A3; FOSL2; PPRC1; ATF3; KLF6; FILIP1L; ZC3H12A; ETS2; IL6; PADI4; FGF14; CLCF1; CREB5; MIDN; NCOA7; ANGPTL4; GEM; ROM1; PRRX1; ABLIM1; NFATC2; NUDT13; SELL; WNK3;
RUNX1	2	37	0.403226	1.6701	0.339791	1	0.613976	0.596636	NR4A2; MBNL2;
LMO2	33	610	6.65323	1.66408	0.00299186	0.62829	0.0369582	0.0359144	MOGAT2; TBX3; CD3G; MTMR4; NOL4; JAKMIP2; C15orf52; SOCS3; GADD45G; FOSL2; EPHA2; HBEGF; ELL; NR4A1; FOXO1; FOSL1; ZFP36; TRIM15; PADI4; LARP1B; NFE2; NR4A2; MYADM; ATP2B4; TGFB3; IER5L; EIF5; SOX17; AMD1; ARAP2; TSPAN13; ZBTB21; SCUBE1;
RUNX2	15	315	3.02419	1.46528	0.0909648	1	0.318244	0.309255	RNF43; ZNF385B; TRPM8; PIM1; CYR61; ARID5B; SLC2A3; CREB5; NR5A2; LIF; TNFAIP6; MCAM; PRKCE; RGCC; TJP2;
GATA1	26	728	5.24194	1.09867	0.338497	1	0.613976	0.596636	FMO1; LRRC20; GRIA3; MOGAT2; SAMD3; MAMDC4; LRIG3; STMN2; JUN; CEBPD; GADD45G; EPHA2; MAP3K8; IL1RL1; RBPMS; CREB5; NFE2; CDC42EP3; NR4A2; MIDN; NR5A2; CDH23; CDKN1A; TEAD4; ABLIM1; PRKCE;
FOXD3	17	361	3.42742	1.44894	0.0817498	1	0.301183	0.292677	RNF43; CYP7A1; C11orf52; ZNF385B; HNF4A; TBX15; NR4A1; HAS2; FGF14; KLF5; CREB5; MBNL2; TNFAIP8L3; SLC7A1; ABCD3; SGK1; TSPAN8;
ISL2	19	515	3.83065	1.13509	0.318308	1	0.592337	0.575608	PALMD; FABP4; ACBD5; TRPM8; MAP3K8; THBS1; ETS2; KLF5; CREB5; NR4A2; GJA1; NCOA7; BAZ1A; SORCS1; PRRX1; ABLIM1; COL1A2; DUSP6; NCAM2;
ZNF143	16	618	3.22581	0.796638	0.857874	1	0.980226	0.952542	SKP2; SLC7A6OS; FAM168A; ZNF219; PRPF40B; ABCG8; ACBD5; PIM1; HBEGF; NR4A1; ZNF331; THBD; MBNL2; IL1RN; PAPPA; NUDT13;
CDX2	11	253	2.21774	1.33818	0.202585	1	0.478009	0.464509	HNF4A; ARID5B; THBS1; CREB5; STC1; MYH11; EFHD1; DEFB118; PRKCE; TIFA; TSPAN8;
FOXK1	5	121	1.00806	1.27316	0.358099	1	0.621354	0.603805	ARID5B; NR4A2; MBNL2; TGFB3; PDLIM3;
FOXO1	10	192	2.01613	1.60315	0.096831	1	0.32277	0.313654	FAM13A; PCDH18; ARID5B; FOXO1; MAFF; NR4A2; TGFB3; AKAP12; YPEL2; NCAM2;
GFI1	23	552	4.6371	1.28184	0.13425	1	0.397078	0.385863	BCAR3; RNF43; KRT222; FRMD7; PDE11A; CNTNAP2; MTMR4; UBE2T; HNF4A; LRIG3; IRAK3; KLF5; CREB5; IL1B; NR5A2; DHODH; MTUS1; RCAN1; COL1A2; IFNGR1; SGCE; SGK1; TSPAN8;
HMX1	6	240	1.20968	0.770035	0.796904	1	0.945479	0.918776	PITPNM2; PCDH18; FOXO1; NR5A2; NRG1; PRRX1;
HOXB9	19	537	3.83065	1.08859	0.385739	1	0.63171	0.613868	LGALS4; SLC12A1; RALGPS1; PKIB; ZNF219; HNF4A; TBX15; STMN2; JUN; ARID5B; THBS1; IL1RL1; KLF5; IL1B; EFHD1; DEFB118; AMD1; COL1A2; RIPK4;
PAX4	10	175	2.01613	1.75888	0.0600061	1	0.257169	0.249906	FBXO2; ZNF385B; GPNMB; TRPM8; BACH2; IVNS1ABP; CREB5; RAB27A; RIPK4; SAMSN1;
PDX1	11	372	2.21774	0.910118	0.669085	1	0.851563	0.827512	CNTNAP2; GCK; ARID5B; BACH2; SIPA1L2; CREB5; NR5A2; STC1; FRMD6; MTUS1; NCAM2;
EOMES	14	291	2.82258	1.48046	0.0939576	1	0.318244	0.309255	TBX10; RAB26; SAMD3; NFIL3; CREB5; NR4A3; NR4A2; SYNE2; CIT; ABLIM1; COL1A2; DUSP6; GPR88; YPEL2;
T	3	46	0.604839	2.01177	0.187768	1	0.473679	0.460301	TBX10; SAMD3; HBEGF;
TBX5	11	204	2.21774	1.65959	0.0699068	1	0.282316	0.274342	TBX10; GRIA3; SAMD3; GNAO1; HBEGF; CREB5; NR4A3; FOXC1; SLC7A1; CIT; TSLP;
ATF6	13	195	2.62097	2.05157	0.0114458	1	0.096145	0.0934296	GRIA3; KDELR3; SPATA18; ZNF385B; NOL4; FOSL2; BCL3; KCNK1; NR4A1; LARP1B; MIDN; FLNC; TSPAN13;
STRA13	17	574	3.42742	0.911276	0.68921	1	0.861642	0.837307	PDP2; FAM13A; PIGR; UGT1A6; DBI; JUN; SOCS2; KLF6; ELF3; NCOA7; KCNE4; RCAN1; FKBP5; PRKCE; SGK1; WNK3; ZBTB21;
ZIC1	27	548	5.44355	1.51566	0.0213084	1	0.138999	0.135073	KDELR3; RALGPS1; EDAR; TMEM98; NOL4; GNAO1; C2orf82; PIM1; ADAMTS1; EPHA2; LYST; TUBB6; ATP2B4; TGFB3; NFKB2; SLC7A1; NRG1; MTUS1; RPGR; LAMC2; ABLIM1; ANP32E; COL1A1; HS3ST3B1; PRKCE; TIFA; YPEL2;
DBX1	10	239	2.01613	1.2879	0.251817	1	0.528816	0.513881	SAMD3; ZNF385B; EGR1; PROK2; CREB5; MBNL2; SPSB1; BAZ1A; COL1A2; TJP2;
FOXJ2	15	299	3.02419	1.54369	0.0646348	1	0.270081	0.262453	BCAR3; PALMD; PDE11A; ZNF385B; FOSB; ARID5B; FILIP1L; FGF14; CREB5; CDC42EP3; PAPPA; MTUS1; ABCD3; COL1A2; SGK1;
HOXD10	1	48	0.201613	0.646926	0.795933	1	0.945479	0.918776	CREB5;
ELF1	21	585	4.23387	1.1044	0.351648	1	0.615383	0.598003	FMO1; RNF43; AMOT; FOSL2; EPHA2; MAP3K8; ITPRIP; MYADM; NBL1; CDKN1A; CD274; RAC1; NRG1; SERPINB2; BCL2A1; ALOX5AP; BHLHE40; CSF2RB; FCER1G; SAMSN1; TMEM154;
FOXJ1	3	31	0.604839	2.9849	0.0785182	1	0.299797	0.29133	GNAO1; MBNL2; TGFB3;
E4F1	9	158	1.81452	1.7535	0.0730804	1	0.289564	0.281386	KDELR3; FOSB; FILIP1L; APOLD1; FGF14; EGR3; LARP1B; NR4A3; MIDN;
ITGAL	8	178	1.6129	1.38374	0.223755	1	0.490639	0.476782	C15orf52; HBEGF; APOLD1; CREB5; NR5A2; MYBPH; ADAMTS4; ROM1;
ESX1	10	266	2.01613	1.15718	0.365334	1	0.622365	0.604788	PALMD; PCDH18; ZNF385B; TRPM8; CREB5; GPM6B; BAZ1A; SORCS1; RCAN1; COL1A2;
TLX2	5	60	1.00806	2.56732	0.0451074	1	0.215285	0.209205	LRRC20; KLF5; CREB5; COL1A2; FKBP5;
DLX5	5	220	1.00806	0.700262	0.846954	1	0.980226	0.952542	RNF43; NOL4; NFIL3; PRRX1; GPR88;
ATF4	17	315	3.42742	1.66052	0.0289501	1	0.162591	0.157999	BCAR3; PAQR7; NOL4; TRPM8; PPP1R15A; KLF11; ETNK1; HIVEP1; CREB5; KLF4; NR4A2; GPM6B; GEM; MCAM; C2CD4A; FLNC; RFC1;
ELF3	17	437	3.42742	1.19696	0.257499	1	0.535395	0.520274	RNF43; GRIA3; SPTLC3; NOL4; LRIG3; CCL2; FILIP1L; ITPRIP; ETNK1; NR4A2; IL18RAP; NFKBIZ; STC1; SBNO2; CTSS; ENPP2; MXD1;
SPDEF	9	189	1.81452	1.4659	0.163572	1	0.457819	0.444888	CENPQ; FCGBP; FILIP1L; NR4A1; IL1RL1; FGF14; RRP12; CSF3; PLEKHA7;
PAX5	7	149	1.41129	1.44666	0.211986	1	0.483881	0.470215	KIAA1161; FOSB; NR4A3; NCOA7; NRG1; SGCE; ZFP36L2;
RBPJ	7	235	1.41129	0.917269	0.646244	1	0.835319	0.811727	PMS2; FADS2; COL5A3; NR4A3; ACTG2; ADAM19; CASP7;
CEBPD	11	113	2.21774	2.99596	0.00112694	0.236658	0.0192763	0.0187319	SAMD3; FOSB; FOS; FOSL2; ARID5B; NFIL3; APOLD1; NFKBIZ; SORCS1; DUSP6; TMEM154;
PATZ1	1	38	0.201613	0.817125	0.715716	1	0.884119	0.859149	IL6;
MAFK	5	128	1.00806	1.20354	0.40346	1	0.646768	0.628501	SAMD3; MBNL2; GJA1; SORCS1; SGCE;
TP53	1	23	0.201613	1.3498	0.532758	1	0.75594	0.73459	CDKN1A;
ALX1	2	56	0.403226	1.10356	0.547824	1	0.760709	0.739224	MBNL2; STC1;
PLAGL1	1	7	0.201613	4.43066	0.206623	1	0.47872	0.465199	FOSB;
SMAD1	1	13	0.201613	2.38731	0.349448	1	0.615383	0.598003	PALMD;
TFCP2L1	1	1	0.201613	30.7514	0.0325182	1	0.162591	0.157999	DUSP6;
UBP1	1	1	0.201613	30.7514	0.0325182	1	0.162591	0.157999	DUSP6;
PLAG1	1	1	0.201613	30.7514	0.0325182	1	0.162591	0.157999	MBNL2;

## Sheet: Clinical phenotype
Analysis: Clinical phenotype
Dataset name: NH
Clinical phenotype	No. of genes in the dataset	No. of genes in the background dataset	Percentage of genes	Fold enrichment	P-value (Hypergeometric test)	Bonferroni method	BH method	Q-value (Storey-Tibshirani method)	genes mapped (from input data set)
Abdomen	24	621	32	0.938098	0.695207	1	1	1	WNT5A; SLC12A1; PMS2; NAGS; CHRNB1; TBX3; AMACR; TTC8; FREM2; ABCC6; GCK; ABCG8; RET; CA12; IL6; TNFRSF1A; LYST; ACTG2; FOXC1; DHODH; PRRX1; CLDN1; COL1A1; RIPK4;
Abdominal distention	1	7	1.33333	3.49589	0.255521	1	1	1	RET;
Abdominal pain	2	19	2.66667	2.56548	0.182882	1	1	1	ABCG8; IL6;
Abdominal tumors (immunodeficiency-associated form)	1	1	1.33333	24.2636	0.0412088	1	1	1	MYC;
Abnormal EEG in 25% hospitalized patients	1	14	1.33333	1.74919	0.446397	1	1	1	CHI3L1;
Abnormal gait	1	9	1.33333	2.71989	0.315858	1	1	1	LYST;
Abnormal iris vasculature	1	1	1.33333	24.2636	0.0412088	1	1	1	FOXC1;
Abnormal keratinocyte differentiation	1	1	1.33333	24.2636	0.0412088	1	1	1	HLA-C;
Abnormal liver function tests	1	10	1.33333	2.44817	0.344191	1	1	1	AMACR;
Abnormal respiration due to defect in autonomic function	1	6	1.33333	4.07757	0.223413	1	1	1	RET;
Abnormal umbilicus	1	2	1.33333	12.1921	0.0807411	1	1	1	WNT5A;
Abnormal uvula (89%)	1	1	1.33333	24.2636	0.0412088	1	1	1	WNT5A;
Absence of acetylcholine receptor (AChR) autoantibodies	1	7	1.33333	3.49589	0.255521	1	1	1	CHRNB1;
Absence of fifth digit	1	1	1.33333	24.2636	0.0412088	1	1	1	DHODH;
Absence of hepatic UDP-glucuronyl-transferase	1	1	1.33333	24.2636	0.0412088	1	1	1	UGT1A1;
Absence of immunostaining to laminin 5 subunits	1	3	1.33333	8.14159	0.118664	1	1	1	LAMC2;
Absence of pancreatic autoantibodies	1	4	1.33333	6.11127	0.155043	1	1	1	GCK;
Absence of telethonin protein	1	1	1.33333	24.2636	0.0412088	1	1	1	TCAP;
Absent 3rd, 4th, and 5th ulnar rays	1	1	1.33333	24.2636	0.0412088	1	1	1	TBX3;
Absent abdominal wall musculature (rare)	1	1	1.33333	24.2636	0.0412088	1	1	1	ACTG2;
Absent calvarial mineralization	2	2	2.66667	24.2636	0.00167644	1	0.712617	1	COL1A1; COL1A2;
Absent clitoris (in some patients)	1	1	1.33333	24.2636	0.0412088	1	1	1	RIPK4;
Absent dermal ridges	1	5	1.33333	4.89146	0.189939	1	1	1	LAMC2;
Absent enteric ganglia beginning at the rectum and extends proximally by varying degrees	1	1	1.33333	24.2636	0.0412088	1	1	1	RET;
Absent eyebrows (in some patients)	1	1	1.33333	24.2636	0.0412088	1	1	1	RIPK4;
Absent eyelashes (in some patients)	1	1	1.33333	24.2636	0.0412088	1	1	1	RIPK4;
Absent fibulae	1	3	1.33333	8.14159	0.118664	1	1	1	TBX15;
Absent iris stromal pattern	1	1	1.33333	24.2636	0.0412088	1	1	1	FOXC1;
Absent nails	1	4	1.33333	6.11127	0.155043	1	1	1	RIPK4;
Absent natural killer cell cytotoxicity	1	2	1.33333	12.1921	0.0807411	1	1	1	LYST;
Absent or malformed lacrimal ducts	1	3	1.33333	8.14159	0.118664	1	1	1	FREM2;
Absent peripheral pulses	1	3	1.33333	8.14159	0.118664	1	1	1	ABCC6;
Absent pro alpha 2(I) chain synthesis (fibroblasts)	1	1	1.33333	24.2636	0.0412088	1	1	1	COL1A2;
Absent proximal finger flexion creases	1	1	1.33333	24.2636	0.0412088	1	1	1	TBX15;
Acanthosis	1	5	1.33333	4.89146	0.189939	1	1	1	CLDN1;
Accelerated atherosclerosis	1	3	1.33333	8.14159	0.118664	1	1	1	ABCC6;
Accessory nipples	1	2	1.33333	12.1921	0.0807411	1	1	1	DHODH;
Accounts for 1-2% of lymphomas in adults	1	1	1.33333	24.2636	0.0412088	1	1	1	MYC;
Accounts for 30-50% of lymphomas in children	1	1	1.33333	24.2636	0.0412088	1	1	1	MYC;
Accumulation of melanosomes in melanocytes	1	2	1.33333	12.1921	0.0807411	1	1	1	RAB27A;
Acetylcholinesterase staining reveals nerve trunk hypertrophy	1	1	1.33333	24.2636	0.0412088	1	1	1	RET;
Acneiform lesions (rare)	1	3	1.33333	8.14159	0.118664	1	1	1	ABCC6;
Acroosteolysis	1	6	1.33333	4.07757	0.223413	1	1	1	HPGD;
Acute demyelinating polyneuropathy	1	1	1.33333	24.2636	0.0412088	1	1	1	PMP22;
Adenomatous colonic polyps	1	4	1.33333	6.11127	0.155043	1	1	1	PMS2;
Adrenal medullary tumor	1	8	1.33333	3.05945	0.286319	1	1	1	RET;
Adult height 92-108 cm	2	2	2.66667	24.2636	0.00167644	1	0.712617	1	COL1A1; COL1A2;
Agenesis of the corpus callosum (in some patients)	1	5	1.33333	4.89146	0.189939	1	1	1	PMS2;
Agenesis of the corpus callosum (variable)	1	1	1.33333	24.2636	0.0412088	1	1	1	PRRX1;
Aggression	1	17	1.33333	1.44069	0.512578	1	1	1	GRIA3;
Aggressive behavior	2	20	2.66667	2.43727	0.198061	1	1	1	NAGS; HDC;
Aglossia	1	1	1.33333	24.2636	0.0412088	1	1	1	PRRX1;
Agnathia	1	1	1.33333	24.2636	0.0412088	1	1	1	PRRX1;
Agoraphobia	1	2	1.33333	12.1921	0.0807411	1	1	1	SGCE;
Airways	1	66	1.33333	0.37125	0.940948	1	1	1	PRRX1;
Allelic disorders with overlapping phenotypes include Charcot-Marie-Tooth disease type 1 (CMT1B,	1	2	1.33333	12.1921	0.0807411	1	1	1	PMP22;
Allelic disorders with overlapping phenotypes include CMT1A (	1	1	1.33333	24.2636	0.0412088	1	1	1	PMP22;
Allelic disorders with overlapping phenotypes include Dejerine-Sottas syndrome (DSS,	1	1	1.33333	24.2636	0.0412088	1	1	1	PMP22;
Allelic disorder to autosomal dominant form (	1	1	1.33333	24.2636	0.0412088	1	1	1	EDAR;
Allelic disorder to autosomal recessive form (	1	1	1.33333	24.2636	0.0412088	1	1	1	EDAR;
Allelic disorder to Charcot-Marie-Tooth disease type 1A (	1	1	1.33333	24.2636	0.0412088	1	1	1	PMP22;
Allelic disorder to dilated cardiomyopathy 1N (CMD1N,	1	1	1.33333	24.2636	0.0412088	1	1	1	TCAP;
Allelic to autosomal recessive PXE (	1	1	1.33333	24.2636	0.0412088	1	1	1	ABCC6;
Allelic to deafness, autosomal recessive 12 (	1	2	1.33333	12.1921	0.0807411	1	1	1	CDH23;
Allelic to Usher syndrome, type ID (	1	2	1.33333	12.1921	0.0807411	1	1	1	CDH23;
Alopecia totalis (in some patients)	1	1	1.33333	24.2636	0.0412088	1	1	1	RIPK4;
Alveolar cell carcinoma	2	16	2.66667	3.04621	0.138673	1	1	1	MAP3K8; IRF1;
Alveolar hypoventilation	1	6	1.33333	4.07757	0.223413	1	1	1	RET;
Alveolar rhabdomyosarcoma	1	3	1.33333	8.14159	0.118664	1	1	1	FOXO1;
Ambiguous genitalia	3	11	4	6.63336	0.0087376	1	1	1	TBX15; RIPK4; SRD5A2;
Amblyopia	1	7	1.33333	3.49589	0.255521	1	1	1	CRYAA;
Amelogenesis imperfecta, hypoplastic	1	2	1.33333	12.1921	0.0807411	1	1	1	FAM20A;
Amniotic Fluid	3	68	4	1.07386	0.538627	1	1	1	SLC12A1; RET; ACTG2;
Anal atresia	1	10	1.33333	2.44817	0.344191	1	1	1	TBX3;
Anal stenosis	2	11	2.66667	4.42959	0.0724472	1	1	1	TBX3; RIPK4;
Anemia	1	43	1.33333	0.569779	0.839778	1	1	1	LYST;
Aneurysm, ascending aorta	1	1	1.33333	24.2636	0.0412088	1	1	1	MYH11;
Aneurysm, descending aorta (in some patients)	1	1	1.33333	24.2636	0.0412088	1	1	1	MYH11;
Angina	1	3	1.33333	8.14159	0.118664	1	1	1	ABCC6;
Angina pectoris	1	3	1.33333	8.14159	0.118664	1	1	1	ABCC6;
Angioid streaks of the retina	1	1	1.33333	24.2636	0.0412088	1	1	1	ABCC6;
Angioid streaks of the retina (85% of patients)	1	3	1.33333	8.14159	0.118664	1	1	1	ABCC6;
Anhidrosis	1	7	1.33333	3.49589	0.255521	1	1	1	EDAR;
Anhydramnios	2	4	2.66667	12.162	0.00952814	1	1	1	RET; ACTG2;
Ankyloblepharon filiforme	1	1	1.33333	24.2636	0.0412088	1	1	1	RIPK4;
Anodontia	1	3	1.33333	8.14159	0.118664	1	1	1	EDAR;
Anteriorly displaced eyes	1	1	1.33333	24.2636	0.0412088	1	1	1	FOXC1;
Anterior pituitary hypoplasia	1	3	1.33333	8.14159	0.118664	1	1	1	TBX3;
Anterior rounding of vertebral bodies	1	1	1.33333	24.2636	0.0412088	1	1	1	TBX15;
Anteverted nares (96%)	1	2	1.33333	12.1921	0.0807411	1	1	1	WNT5A;
Anteverted nostrils	1	18	1.33333	1.3607	0.532853	1	1	1	GCK;
Anxiety	1	18	1.33333	1.3607	0.532853	1	1	1	SGCE;
Aortic insufficiency	1	4	1.33333	6.11127	0.155043	1	1	1	COL1A2;
Aortic root dilatation	1	6	1.33333	4.07757	0.223413	1	1	1	COL1A1;
Aortic valve regurgitation	1	3	1.33333	8.14159	0.118664	1	1	1	MYH11;
Aphthous ulcers	1	3	1.33333	8.14159	0.118664	1	1	1	IL6;
Aphthous ulcers (lips, gingiva, buccal mucosa)	1	2	1.33333	12.1921	0.0807411	1	1	1	IL6;
Areflexia	1	38	1.33333	0.64473	0.801299	1	1	1	PMP22;
Areflexia in lower limbs	1	2	1.33333	12.1921	0.0807411	1	1	1	TCAP;
Arteriosclerosis	1	2	1.33333	12.1921	0.0807411	1	1	1	ABCC6;
ARTERIOVENOUS MALFORMATIONS OF THE BRAIN	1	1	1.33333	24.2636	0.0412088	1	1	1	IL6;
Arthralgia	1	7	1.33333	3.49589	0.255521	1	1	1	HPGD;
Arthralgias	1	3	1.33333	8.14159	0.118664	1	1	1	TNFRSF1A;
Arthritis	2	14	2.66667	3.48107	0.110783	1	1	1	ABCG8; HPGD;
Arthritis (large joints, small joint, or central axial skeleton)	1	1	1.33333	24.2636	0.0412088	1	1	1	HLA-C;
Aspirin intolerance	1	2	1.33333	12.1921	0.0807411	1	1	1	PTGER2;
Asthenic body habitus	1	1	1.33333	24.2636	0.0412088	1	1	1	GRIA3;
Asthma	1	31	1.33333	0.790268	0.7317	1	1	1	IL4R;
ASTHMA, NASAL POLYPS, AND ASPIRIN INTOLERANCE	1	2	1.33333	12.1921	0.0807411	1	1	1	PTGER2;
Astrocytoma	1	6	1.33333	4.07757	0.223413	1	1	1	PMS2;
Asymmetric nipples (in some patients)	1	1	1.33333	24.2636	0.0412088	1	1	1	RIPK4;
Ataxia	2	130	2.66667	0.375123	0.975963	1	1	1	TTC8; GJA1;
Ataxic gait	1	7	1.33333	3.49589	0.255521	1	1	1	PMP22;
Atherosclerosis	1	5	1.33333	4.89146	0.189939	1	1	1	ABCG8;
Atopic hypersensitivity	1	8	1.33333	3.05945	0.286319	1	1	1	IL4R;
Atrial septal defect	1	47	1.33333	0.521298	0.865182	1	1	1	FOXC1;
Atrioventricular septal defect (AVSD)	1	1	1.33333	24.2636	0.0412088	1	1	1	GJA1;
Atrophic scarring	1	7	1.33333	3.49589	0.255521	1	1	1	LAMC2;
Atrophic scars	2	2	2.66667	24.2636	0.00167644	1	0.712617	1	COL1A1; COL1A2;
Atrophy of affected muscles, especially intrinsic hand muscles	1	4	1.33333	6.11127	0.155043	1	1	1	CHRNB1;
Attention deficit hyperactivity disorder (ADHD)	1	2	1.33333	12.1921	0.0807411	1	1	1	HDC;
ATYPICAL MYCOBACTERIOSIS, FAMILIAL	1	5	1.33333	4.89146	0.189939	1	1	1	IFNGR1;
Autistic features	1	25	1.33333	0.979856	0.653267	1	1	1	GRIA3;
Autosomal dominant (20q12-q13.1)	1	1	1.33333	24.2636	0.0412088	1	1	1	HNF4A;
Autosomal dominant	36	747	48	1.16964	0.129368	1	1	1	WNT5A; HMMR; CEBPA; EDAR; CHRNB1; TBX3; CRYAA; BRCA1; ABCC6; GCK; RET; HNF4A; KIF22; EPHA2; IL4R; IL6; TNFRSF1A; IL1B; ACTG2; IL1RN; FOXC1; GJA1; HDC; TGFB3; CHI3L1; MLF1; MYH11; PMP22; VCAN; IRS2; PRRX1; COL1A1; COL1A2; HPGD; SGCE; SLC3A1;
Autosomal dominant form	3	37	4	1.97334	0.193406	1	1	1	CCL2; KLF6; PMP22;
Autosomal dominant inheritance is more common	1	4	1.33333	6.11127	0.155043	1	1	1	CHRNB1;
Autosomal dominant with variable expression and incomplete penetrance	1	1	1.33333	24.2636	0.0412088	1	1	1	GJA1;
Autosomal recessive	37	924	49.3333	0.971845	0.645094	1	1	1	SLC12A1; EDAR; PMS2; NAGS; CHRNB1; AMACR; TTC8; FREM2; ABCC6; CASC5; ABCG8; RET; TCAP; CA12; TBX15; MRAP; MAP3K8; FOXO1; LYST; RAB27A; PTGER2; GJA1; DHODH; CDH23; PMP22; IRF1; LAMC2; PRRX1; CLDN1; COL1A2; FAM20A; HPGD; IFNGR1; RIPK4; SLC3A1; SRD5A2; UGT1A1;
Autosomal recessive and dominant pedigrees described	1	1	1.33333	24.2636	0.0412088	1	1	1	DHODH;
Autosomal recessive inheritance has been reported in 1 case	1	1	1.33333	24.2636	0.0412088	1	1	1	PRRX1;
Autosomal recessive susceptibility	1	5	1.33333	4.89146	0.189939	1	1	1	OAS1;
Autosomal recessive vs. multifactorial	1	4	1.33333	6.11127	0.155043	1	1	1	GJA1;
Average age at onset 38 years	2	4	2.66667	12.162	0.00952814	1	1	1	IL1B; IL1RN;
Axial hypotonia	1	20	1.33333	1.2247	0.57094	1	1	1	GCK;
Axillary apocrine gland hypoplasia	1	1	1.33333	24.2636	0.0412088	1	1	1	TBX3;
Axillary freckling	1	5	1.33333	4.89146	0.189939	1	1	1	PMS2;
Axillary pterygium, bilateral (in some patients)	1	1	1.33333	24.2636	0.0412088	1	1	1	RIPK4;
Barium enema shows transition zone between aganglionic contracted segment and dilated proximal bowel	1	2	1.33333	12.1921	0.0807411	1	1	1	RET;
BARTTER SYNDROME, ANTENATAL, TYPE 1	1	1	1.33333	24.2636	0.0412088	1	1	1	SLC12A1;
Basal cell carcinoma	1	11	1.33333	2.22581	0.371366	1	1	1	PMS2;
Basal ganglia calcification	1	3	1.33333	8.14159	0.118664	1	1	1	GJA1;
Basilar impression	2	2	2.66667	24.2636	0.00167644	1	0.712617	1	COL1A1; COL1A2;
Beaded ribs	2	3	2.66667	16.2026	0.0048947	1	1	1	COL1A1; COL1A2;
Beaked nose	2	14	2.66667	3.48107	0.110783	1	1	1	COL1A1; COL1A2;
Behavioral Psychiatric Manifestations	3	200	4	0.365148	0.992431	1	1	1	GRIA3; NAGS; SGCE;
Bell-shaped chest	1	2	1.33333	12.1921	0.0807411	1	1	1	TBX15;
Beta-cell dysfunction	1	4	1.33333	6.11127	0.155043	1	1	1	GCK;
Biconcave flattened vertebrae	2	2	2.66667	24.2636	0.00167644	1	0.712617	1	COL1A1; COL1A2;
Bicornuate uterus	1	8	1.33333	3.05945	0.286319	1	1	1	FREM2;
Bifid scrotum	1	10	1.33333	2.44817	0.344191	1	1	1	SRD5A2;
Bifid terminal phalanges	1	2	1.33333	12.1921	0.0807411	1	1	1	WNT5A;
Bifid tongue (39%)	1	1	1.33333	24.2636	0.0412088	1	1	1	WNT5A;
Bilateral fifth finger clinodactyly	1	1	1.33333	24.2636	0.0412088	1	1	1	TBX15;
Bilirubin encephalopathy	1	1	1.33333	24.2636	0.0412088	1	1	1	UGT1A1;
Bladder	5	90	6.66667	1.35052	0.311529	1	1	1	ABCC6; RET; ACTG2; FAM20A; SLC3A1;
Bladder abnormalities	1	3	1.33333	8.14159	0.118664	1	1	1	RET;
Bladder hemorrhage	1	3	1.33333	8.14159	0.118664	1	1	1	ABCC6;
Bladder hypoplasia	1	3	1.33333	8.14159	0.118664	1	1	1	RET;
Bleeding tendencies	1	2	1.33333	12.1921	0.0807411	1	1	1	ABCG8;
Blind-ended trachea	1	1	1.33333	24.2636	0.0412088	1	1	1	PRRX1;
Blindness	1	41	1.33333	0.597566	0.825359	1	1	1	FREM2;
Blind perineal pouch resembling vagina	1	1	1.33333	24.2636	0.0412088	1	1	1	SRD5A2;
Blue sclerae	3	10	4	7.29604	0.00654693	1	1	1	ABCC6; COL1A1; COL1A2;
Blue sclerae at birth becoming normal with age	2	2	2.66667	24.2636	0.00167644	1	0.712617	1	COL1A1; COL1A2;
Bony paranasal bossing	1	1	1.33333	24.2636	0.0412088	1	1	1	GJA1;
Bony synostosis	1	1	1.33333	24.2636	0.0412088	1	1	1	RIPK4;
Both autosomal recessive (	1	2	1.33333	12.1921	0.0807411	1	1	1	GJA1;
Both recessive and dominant inheritance have been reported	1	2	1.33333	12.1921	0.0807411	1	1	1	SLC3A1;
Bowed limbs due to multiple fractures	2	2	2.66667	24.2636	0.00167644	1	0.712617	1	COL1A1; COL1A2;
Bowel diverticula	1	3	1.33333	8.14159	0.118664	1	1	1	COL1A1;
Bowel obstruction	1	2	1.33333	12.1921	0.0807411	1	1	1	IL6;
Bowing of limbs due to multiple fractures	2	3	2.66667	16.2026	0.0048947	1	1	1	COL1A1; COL1A2;
Brachycephaly	1	37	1.33333	0.662151	0.792573	1	1	1	GRIA3;
Brachydactyly	1	64	1.33333	0.38285	0.93556	1	1	1	TTC8;
Brachydactyly (81%)	1	1	1.33333	24.2636	0.0412088	1	1	1	WNT5A;
Brachymesophalangism V	1	2	1.33333	12.1921	0.0807411	1	1	1	WNT5A;
Breast cancer	1	5	1.33333	4.89146	0.189939	1	1	1	BRCA1;
BREAST CANCER	1	23	1.33333	1.06502	0.622396	1	1	1	HMMR;
Breast cancer, lobular	2	4	2.66667	12.162	0.00952814	1	1	1	IL1B; IL1RN;
Breast carcinoma	1	23	1.33333	1.06502	0.622396	1	1	1	HMMR;
Breast hypoplasia	1	5	1.33333	4.89146	0.189939	1	1	1	TBX3;
Breasts	4	55	5.33333	1.76871	0.188254	1	1	1	TBX3; FREM2; DHODH; RIPK4;
Breech presentation	2	7	2.66667	6.95717	0.0307647	1	1	1	COL1A1; COL1A2;
Broad alveolar ridges	1	3	1.33333	8.14159	0.118664	1	1	1	GJA1;
Broad crumpled long bones	2	2	2.66667	24.2636	0.00167644	1	0.712617	1	COL1A1; COL1A2;
Broad, low nasal bridge	1	3	1.33333	8.14159	0.118664	1	1	1	FREM2;
Broad nasal bridge	1	34	1.33333	0.720559	0.764066	1	1	1	GJA1;
Broad nasal bridge (97%)	1	1	1.33333	24.2636	0.0412088	1	1	1	WNT5A;
Broad, square ends of distal phalanges	1	1	1.33333	24.2636	0.0412088	1	1	1	KIF22;
Broad thumbs (36%)	1	1	1.33333	24.2636	0.0412088	1	1	1	WNT5A;
Broad toes (33%)	1	1	1.33333	24.2636	0.0412088	1	1	1	WNT5A;
Broad tubular bones	1	1	1.33333	24.2636	0.0412088	1	1	1	GJA1;
Bronchial asthma	1	2	1.33333	12.1921	0.0807411	1	1	1	PTGER2;
Brown macules in a reticulate pattern (rare)	1	3	1.33333	8.14159	0.118664	1	1	1	ABCC6;
Burkitt lymphoma (B-cell lymphoma)	1	1	1.33333	24.2636	0.0412088	1	1	1	MYC;
Cafe-au-lait spots	1	13	1.33333	1.88364	0.422424	1	1	1	PMS2;
CAFFEY DISEASE	1	1	1.33333	24.2636	0.0412088	1	1	1	COL1A1;
Calcaneovalgus	1	3	1.33333	8.14159	0.118664	1	1	1	COL1A2;
Calcification of falx cerebri	1	2	1.33333	12.1921	0.0807411	1	1	1	ABCC6;
Calcifications (atrial and ventricular endocardium)	1	3	1.33333	8.14159	0.118664	1	1	1	ABCC6;
Calcium accumulation in junctional folds seen on muscle biopsy	1	4	1.33333	6.11127	0.155043	1	1	1	CHRNB1;
Calf hypertrophy (reported in 1 family)	1	1	1.33333	24.2636	0.0412088	1	1	1	TCAP;
Camptodactyly	1	36	1.33333	0.680539	0.78347	1	1	1	TBX15;
Can be effectively treated with N-carbamylglutamate	1	1	1.33333	24.2636	0.0412088	1	1	1	NAGS;
Cardiac	3	55	4	1.32764	0.397459	1	1	1	RET; GJA1; UGT1A1;
Cardiac muscle is involved in a subset of patients	1	1	1.33333	24.2636	0.0412088	1	1	1	TCAP;
Cardiomyopathy, right ventricular	1	2	1.33333	12.1921	0.0807411	1	1	1	TGFB3;
Cardiovascular	13	446	17.3333	0.707762	0.950957	1	1	1	WNT5A; SLC12A1; TBX3; TTC8; ABCC6; ABCG8; TCAP; FOXC1; TGFB3; MYH11; COL1A1; COL1A2; HPGD;
Carotid aneurysm, intracranial (in some patients)	1	1	1.33333	24.2636	0.0412088	1	1	1	MYH11;
Cataract	2	36	2.66667	1.35434	0.441582	1	1	1	GJA1; VCAN;
Cataract, anterior polar	1	1	1.33333	24.2636	0.0412088	1	1	1	CRYAA;
Cataract, anterior subcapsular	1	1	1.33333	24.2636	0.0412088	1	1	1	CRYAA;
Cataract, congenital, multiple types	1	2	1.33333	12.1921	0.0807411	1	1	1	CRYAA;
Cataract, cortical	1	1	1.33333	24.2636	0.0412088	1	1	1	CRYAA;
Cataract, fan-shaped	1	1	1.33333	24.2636	0.0412088	1	1	1	CRYAA;
Cataract, lamellar	1	1	1.33333	24.2636	0.0412088	1	1	1	CRYAA;
Cataract, laminar	1	1	1.33333	24.2636	0.0412088	1	1	1	CRYAA;
Cataract, nuclear	1	3	1.33333	8.14159	0.118664	1	1	1	CRYAA;
Cataract, posterior polar	1	2	1.33333	12.1921	0.0807411	1	1	1	CRYAA;
Cataract, posterior subcapsular	1	1	1.33333	24.2636	0.0412088	1	1	1	CRYAA;
Cataract, presenile	1	1	1.33333	24.2636	0.0412088	1	1	1	CRYAA;
Cataract, progressive (in some patients)	1	1	1.33333	24.2636	0.0412088	1	1	1	CRYAA;
Cataracts	1	49	1.33333	0.500024	0.87635	1	1	1	TTC8;
Cataract, total	1	1	1.33333	24.2636	0.0412088	1	1	1	CRYAA;
Cataract, zonular central nuclear	1	1	1.33333	24.2636	0.0412088	1	1	1	CRYAA;
Catatonic behavior	1	14	1.33333	1.74919	0.446397	1	1	1	CHI3L1;
Caudal narrowing of interpedicular distances	1	1	1.33333	24.2636	0.0412088	1	1	1	KIF22;
C-cell hyperplasia	1	1	1.33333	24.2636	0.0412088	1	1	1	RET;
Centralized myonuclei	1	1	1.33333	24.2636	0.0412088	1	1	1	TCAP;
Central Nervous System	26	887	34.6667	0.711486	0.995718	1	1	1	WNT5A; GRIA3; SLC12A1; PMS2; NAGS; TBX3; TTC8; FREM2; ABCC6; GCK; CASC5; RET; KIF22; TBX15; LYST; RAB27A; FOXC1; GJA1; HDC; CHI3L1; MYH11; PRRX1; COL1A1; COL1A2; SGCE; UGT1A1;
Central vision loss	1	4	1.33333	6.11127	0.155043	1	1	1	ABCC6;
Cerebellar signs	1	11	1.33333	2.22581	0.371366	1	1	1	RAB27A;
Cerebellar vermis hypoplasia	1	9	1.33333	2.71989	0.315858	1	1	1	FOXC1;
Cerebellar vermis hypoplasia (in some patients)	1	1	1.33333	24.2636	0.0412088	1	1	1	FOXC1;
Cerebral arteriovenous malformation	1	4	1.33333	6.11127	0.155043	1	1	1	IL6;
Cerebral hemorrhage	2	10	2.66667	4.8721	0.0608636	1	1	1	ABCC6; RET;
Cerebral white matter abnormalities	1	2	1.33333	12.1921	0.0807411	1	1	1	GJA1;
Cervical muscle weakness	1	4	1.33333	6.11127	0.155043	1	1	1	CHRNB1;
Characteristic feature of Down syndrome	1	1	1.33333	24.2636	0.0412088	1	1	1	GJA1;
CHARCOT-MARIE-TOOTH DISEASE AND DEAFNESS	1	1	1.33333	24.2636	0.0412088	1	1	1	PMP22;
Chest	13	243	17.3333	1.299	0.191321	1	1	1	WNT5A; TBX3; FREM2; ABCC6; RET; TBX15; TNFRSF1A; GJA1; DHODH; COL1A1; COL1A2; HPGD; RIPK4;
Childhood onset	1	3	1.33333	8.14159	0.118664	1	1	1	PMP22;
Choanal atresia	1	17	1.33333	1.44069	0.512578	1	1	1	DHODH;
Cholestasis	1	9	1.33333	2.71989	0.315858	1	1	1	CLDN1;
Cholesterol biosynthesis severely depressed	1	2	1.33333	12.1921	0.0807411	1	1	1	ABCG8;
Chondrocalcinosis	1	6	1.33333	4.07757	0.223413	1	1	1	SLC12A1;
Chorioretinal atrophy	1	2	1.33333	12.1921	0.0807411	1	1	1	VCAN;
Choroidal neovascularization	1	4	1.33333	6.11127	0.155043	1	1	1	ABCC6;
Chromosomal translocations involving c-myc (	1	1	1.33333	24.2636	0.0412088	1	1	1	MYC;
Chronic fatigable muscles	1	4	1.33333	6.11127	0.155043	1	1	1	CHRNB1;
Chronic granulomatous nodules (rare)	1	3	1.33333	8.14159	0.118664	1	1	1	ABCC6;
Chronic hemolytic anemia	1	2	1.33333	12.1921	0.0807411	1	1	1	ABCG8;
Chronic hypercapnia	1	6	1.33333	4.07757	0.223413	1	1	1	RET;
Chronic hypoxemia	1	6	1.33333	4.07757	0.223413	1	1	1	RET;
Cicatricial frontoparietal alopecia	1	1	1.33333	24.2636	0.0412088	1	1	1	CLDN1;
Cigarette-paper scars	1	4	1.33333	6.11127	0.155043	1	1	1	COL1A1;
Claudication	1	2	1.33333	12.1921	0.0807411	1	1	1	ABCC6;
Claw hand deformities	1	2	1.33333	12.1921	0.0807411	1	1	1	PMP22;
Claw hand deformities (in severe cases)	1	7	1.33333	3.49589	0.255521	1	1	1	PMP22;
Cleft lip	4	43	5.33333	2.26219	0.0977434	1	1	1	FREM2; GJA1; DHODH; RIPK4;
Cleft lip (in some patients)	2	6	2.66667	8.11477	0.0225716	1	1	1	IL1B; IL1RN;
Cleft lip/palate (35%)	1	1	1.33333	24.2636	0.0412088	1	1	1	WNT5A;
Cleft palate	6	97	8	1.50319	0.206483	1	1	1	FREM2; TBX15; GJA1; DHODH; PRRX1; RIPK4;
Cleft palate (in some patients)	2	7	2.66667	6.95717	0.0307647	1	1	1	IL1B; IL1RN;
Clinically 'silent' nystagmus evident on eye movement recording (in carrier females)	1	1	1.33333	24.2636	0.0412088	1	1	1	FRMD7;
Clinical manifestation of some forms of Bardet-Biedl syndrome requires recessive mutation in 1 of the 6 loci plus an additional mutation in a second locus	1	19	1.33333	1.28912	0.552296	1	1	1	TTC8;
Clinical overlap with congenital hypomyelinating neuropathy (CHN,	1	4	1.33333	6.11127	0.155043	1	1	1	PMP22;
Clinical overlap with demyelinating Charcot-Marie-Tooth disease type 1 (see CMT1B,	1	4	1.33333	6.11127	0.155043	1	1	1	PMP22;
Clinodactyly	1	39	1.33333	0.628203	0.809661	1	1	1	GCK;
Clinodactyly (70%)	1	1	1.33333	24.2636	0.0412088	1	1	1	WNT5A;
Clitoral enlargement	1	3	1.33333	8.14159	0.118664	1	1	1	FREM2;
Cloudy corneas (in some patients)	1	1	1.33333	24.2636	0.0412088	1	1	1	RIPK4;
Clubbing	1	2	1.33333	12.1921	0.0807411	1	1	1	HPGD;
Club feet	2	15	2.66667	3.24915	0.124535	1	1	1	RET; TBX15;
Club-shaped distal femora	1	1	1.33333	24.2636	0.0412088	1	1	1	GJA1;
Coagulopathy secondary to liver disease	1	2	1.33333	12.1921	0.0807411	1	1	1	AMACR;
Coarse-appearing facies	1	1	1.33333	24.2636	0.0412088	1	1	1	RET;
Coarse facial features	2	15	2.66667	3.24915	0.124535	1	1	1	GJA1; HPGD;
Codfish vertebrae	2	2	2.66667	24.2636	0.00167644	1	0.712617	1	COL1A1; COL1A2;
Cold-induced muscle cramps	1	2	1.33333	12.1921	0.0807411	1	1	1	PMP22;
Colloid bodies	1	3	1.33333	8.14159	0.118664	1	1	1	ABCC6;
Coloboma of the iris (in some patients)	1	1	1.33333	24.2636	0.0412088	1	1	1	CRYAA;
Colonic adenocarcinoma	1	4	1.33333	6.11127	0.155043	1	1	1	PMS2;
Colonic diverticulosis	1	1	1.33333	24.2636	0.0412088	1	1	1	RET;
Colorectal cancer (in some patients)	2	4	2.66667	12.162	0.00952814	1	1	1	IL1B; IL1RN;
Coma	1	48	1.33333	0.51044	0.870885	1	1	1	NAGS;
Coma, hypoglycemic	1	1	1.33333	24.2636	0.0412088	1	1	1	GCK;
Common (up to 7% of the population)	1	1	1.33333	24.2636	0.0412088	1	1	1	UGT1A1;
Conductive hearing loss	2	22	2.66667	2.2158	0.228833	1	1	1	FREM2; DHODH;
Cone dysfunction	1	1	1.33333	24.2636	0.0412088	1	1	1	RPGR;
Confusion	1	10	1.33333	2.44817	0.344191	1	1	1	NAGS;
Congenital bilateral hip dislocation	2	2	2.66667	24.2636	0.00167644	1	0.712617	1	COL1A1; COL1A2;
Congenital heart defects	1	22	1.33333	1.11341	0.60596	1	1	1	TTC8;
Congenital hip dislocation	2	13	2.66667	3.74864	0.0974756	1	1	1	KIF22; DHODH;
Congenital localized absence of skin	1	3	1.33333	8.14159	0.118664	1	1	1	LAMC2;
Congestive heart failure	3	25	4	2.92017	0.0807032	1	1	1	ABCC6; COL1A1; COL1A2;
Conical teeth	1	3	1.33333	8.14159	0.118664	1	1	1	DHODH;
Conjunctival injection	1	1	1.33333	24.2636	0.0412088	1	1	1	TNFRSF1A;
Constipation	3	41	4	1.78087	0.237147	1	1	1	SLC12A1; RET; ACTG2;
Coprolalia	1	2	1.33333	12.1921	0.0807411	1	1	1	HDC;
Corectopia	1	1	1.33333	24.2636	0.0412088	1	1	1	FOXC1;
Coronary artery disease	1	7	1.33333	3.49589	0.255521	1	1	1	ABCC6;
Coronary artery disease (in some patients)	1	1	1.33333	24.2636	0.0412088	1	1	1	MYH11;
Coronary atherosclerosis	1	2	1.33333	12.1921	0.0807411	1	1	1	ABCG8;
COUSIN SYNDROME	1	1	1.33333	24.2636	0.0412088	1	1	1	TBX15;
Cranial nerve palsies	1	5	1.33333	4.89146	0.189939	1	1	1	LYST;
Creatine kinase levels may normalize with disease progression	1	1	1.33333	24.2636	0.0412088	1	1	1	TCAP;
CRIGLER-NAJJAR SYNDROME, TYPE I	1	1	1.33333	24.2636	0.0412088	1	1	1	UGT1A1;
CRIGLER-NAJJAR SYNDROME, TYPE II	1	1	1.33333	24.2636	0.0412088	1	1	1	UGT1A1;
Crowded teeth (49%)	1	1	1.33333	24.2636	0.0412088	1	1	1	WNT5A;
Cryptophthalmos	1	3	1.33333	8.14159	0.118664	1	1	1	FREM2;
Cryptorchidism	2	101	2.66667	0.482821	0.92939	1	1	1	FREM2; DHODH;
Cryptorchidism (72%)	1	1	1.33333	24.2636	0.0412088	1	1	1	WNT5A;
Cryptorchidism, bilateral (in some patients)	1	1	1.33333	24.2636	0.0412088	1	1	1	RIPK4;
Cryptorchid testes	1	1	1.33333	24.2636	0.0412088	1	1	1	SRD5A2;
Cubitus valgus	1	9	1.33333	2.71989	0.315858	1	1	1	GJA1;
Cupped ears (in some patients)	1	2	1.33333	12.1921	0.0807411	1	1	1	RIPK4;
Cup-shaped ears	1	5	1.33333	4.89146	0.189939	1	1	1	DHODH;
Cushing syndrome	1	3	1.33333	8.14159	0.118664	1	1	1	RET;
Cutaneous lichen amyloidosis	1	1	1.33333	24.2636	0.0412088	1	1	1	RET;
Cyanosis	1	7	1.33333	3.49589	0.255521	1	1	1	GJA1;
CYSTINURIA	1	2	1.33333	12.1921	0.0807411	1	1	1	SLC3A1;
Dagger-shaped pulp calcifications	1	1	1.33333	24.2636	0.0412088	1	1	1	FAM20A;
Dark iris color	1	1	1.33333	24.2636	0.0412088	1	1	1	FOXC1;
Death in childhood	1	3	1.33333	8.14159	0.118664	1	1	1	RAB27A;
Death in infancy secondary to kernicterus	1	1	1.33333	24.2636	0.0412088	1	1	1	UGT1A1;
Death in utero or in the perinatal period	1	3	1.33333	8.14159	0.118664	1	1	1	RET;
Decreased basal body temperature	1	6	1.33333	4.07757	0.223413	1	1	1	RET;
Decreased bilirubin concentration with phenobarbital administration	1	1	1.33333	24.2636	0.0412088	1	1	1	UGT1A1;
Decreased deep tendon reflexes	1	2	1.33333	12.1921	0.0807411	1	1	1	LYST;
Decreased hepatic UDP-glucuronyl-transferase activity	1	1	1.33333	24.2636	0.0412088	1	1	1	UGT1A1;
Decreased joint mobility	1	2	1.33333	12.1921	0.0807411	1	1	1	HPGD;
Decreased motility (in all patients)	1	1	1.33333	24.2636	0.0412088	1	1	1	ACTG2;
Decreased motor nerve conduction velocities (NCV)	1	2	1.33333	12.1921	0.0807411	1	1	1	PMP22;
Decreased motor nerve conduction velocity (NCV)	1	2	1.33333	12.1921	0.0807411	1	1	1	PMP22;
Decreased motor nerve conduction velocity (NCV) (less than 20 m/s)	1	2	1.33333	12.1921	0.0807411	1	1	1	PMP22;
Decreased motor nerve conduction velocity (NCV) (less than 38 m/s)	1	5	1.33333	4.89146	0.189939	1	1	1	PMP22;
Decreased neutrophil and monocyte migration and chemotaxis	1	1	1.33333	24.2636	0.0412088	1	1	1	LYST;
Decreased number of myelinated fibers	1	5	1.33333	4.89146	0.189939	1	1	1	PMP22;
Decreased or absent serum citrulline	1	1	1.33333	24.2636	0.0412088	1	1	1	NAGS;
Decreased or absent UDP-glucuronyl-transferase activity	1	1	1.33333	24.2636	0.0412088	1	1	1	UGT1A1;
Decreased sensitivity to hypercapnia and hypoxemia	1	6	1.33333	4.07757	0.223413	1	1	1	RET;
Decreased serum cholesterol	1	3	1.33333	8.14159	0.118664	1	1	1	AMACR;
Decreased size of nerve terminals seen on muscle biopsy	1	4	1.33333	6.11127	0.155043	1	1	1	CHRNB1;
Decreased urinary calcium and phosphate excretion	1	1	1.33333	24.2636	0.0412088	1	1	1	FAM20A;
Decreased visual acuity	2	21	2.66667	2.32126	0.21339	1	1	1	CRYAA; ABCC6;
Deep-set eyes	1	19	1.33333	1.28912	0.552296	1	1	1	GRIA3;
Defective DHT formation	1	1	1.33333	24.2636	0.0412088	1	1	1	SRD5A2;
Deficiency of delayed skin hypersensitivity	1	1	1.33333	24.2636	0.0412088	1	1	1	RAB27A;
Degeneration and fibrosis of muscularis propria of small bowel	1	1	1.33333	24.2636	0.0412088	1	1	1	ACTG2;
Dehydration	1	23	1.33333	1.06502	0.622396	1	1	1	SLC12A1;
Delayed bone age	1	31	1.33333	0.790268	0.7317	1	1	1	WNT5A;
Delayed closure of the fontanels	1	1	1.33333	24.2636	0.0412088	1	1	1	HPGD;
Delayed dental eruption	1	3	1.33333	8.14159	0.118664	1	1	1	WNT5A;
Delayed eruption of permanent teeth	1	3	1.33333	8.14159	0.118664	1	1	1	GJA1;
Delayed gross motor development	2	3	2.66667	16.2026	0.0048947	1	1	1	COL1A1; COL1A2;
Delayed growth	1	2	1.33333	12.1921	0.0807411	1	1	1	TBX3;
Delayed motor development	1	55	1.33333	0.445486	0.90466	1	1	1	PMP22;
Delayed permanent dentition	1	1	1.33333	24.2636	0.0412088	1	1	1	FAM20A;
Delayed puberty	1	16	1.33333	1.53068	0.491435	1	1	1	TBX3;
Delayed wound healing	1	2	1.33333	12.1921	0.0807411	1	1	1	COL1A2;
Delivery	3	43	4	1.69805	0.259656	1	1	1	SLC12A1; COL1A1; COL1A2;
Delusions	1	28	1.33333	0.874909	0.694961	1	1	1	CHI3L1;
Dense diaphyses	1	1	1.33333	24.2636	0.0412088	1	1	1	GJA1;
Dental caries	2	19	2.66667	2.56548	0.182882	1	1	1	GJA1; LAMC2;
Dental crowding	1	29	1.33333	0.84475	0.707727	1	1	1	TTC8;
Dentinogenesis imperfecta	2	4	2.66667	12.162	0.00952814	1	1	1	COL1A1; COL1A2;
Dentinogenesis imperfecta (both primary and secondary teeth)	2	2	2.66667	24.2636	0.00167644	1	0.712617	1	COL1A1; COL1A2;
Dentinogenesis imperfecta (rare)	1	1	1.33333	24.2636	0.0412088	1	1	1	COL1A1;
Depressed nasal bridge (78%)	1	1	1.33333	24.2636	0.0412088	1	1	1	WNT5A;
Depressed nasal bridge ('saddle nose')	1	1	1.33333	24.2636	0.0412088	1	1	1	EDAR;
Depression	1	37	1.33333	0.662151	0.792573	1	1	1	SGCE;
Developmental delay (20%)	1	1	1.33333	24.2636	0.0412088	1	1	1	WNT5A;
Developmental delay	4	141	5.33333	0.69	0.847629	1	1	1	SLC12A1; TTC8; GCK; RET;
Diabetes mellitus	3	27	4	2.70394	0.0968636	1	1	1	OAS1; GCK; HNF4A;
Diabetes mellitus, insulin-dependent, late onset (uncommon)	1	1	1.33333	24.2636	0.0412088	1	1	1	GCK;
Diabetic peripheral neuropathy in long-standing cases	1	4	1.33333	6.11127	0.155043	1	1	1	GCK;
Diagnosis within the first 3 months of life	1	4	1.33333	6.11127	0.155043	1	1	1	GCK;
Diarrhea	4	56	5.33333	1.73713	0.196788	1	1	1	SLC12A1; RET; IL6; ACTG2;
Diastasis of symphysis pubis	1	3	1.33333	8.14159	0.118664	1	1	1	FREM2;
Difficulty climbing stairs	1	4	1.33333	6.11127	0.155043	1	1	1	TCAP;
Difficulty walking on heels occurs prior to difficulty walking on toes	1	1	1.33333	24.2636	0.0412088	1	1	1	TCAP;
Difficulty walking, running	1	1	1.33333	24.2636	0.0412088	1	1	1	TCAP;
Diffuse brain and spinal cord atrophy on brain CT/MRI	1	1	1.33333	24.2636	0.0412088	1	1	1	LYST;
Diffuse hypotonia	1	7	1.33333	3.49589	0.255521	1	1	1	GCK;
Diffuse yellow-orange non-epidermolytic hyperkeratosis on palms and soles (palmoplantar keratoderma)	1	1	1.33333	24.2636	0.0412088	1	1	1	GJA1;
Digenic form type ID/F caused by digenic mutation in the CDH23 and PCDH15 (	1	2	1.33333	12.1921	0.0807411	1	1	1	CDH23;
Digenic recessive	2	24	2.66667	2.03123	0.259922	1	1	1	TTC8; CDH23;
Digital clubbing	1	4	1.33333	6.11127	0.155043	1	1	1	HPGD;
DIGITAL CLUBBING, ISOLATED CONGENITAL	1	1	1.33333	24.2636	0.0412088	1	1	1	HPGD;
Dilated large intestine	1	1	1.33333	24.2636	0.0412088	1	1	1	ACTG2;
Dilated small intestine	1	1	1.33333	24.2636	0.0412088	1	1	1	ACTG2;
Dilated stomach	1	1	1.33333	24.2636	0.0412088	1	1	1	ACTG2;
Diminished or absent peripheral pulses	1	1	1.33333	24.2636	0.0412088	1	1	1	ABCC6;
Diminished pupillary light responses	1	6	1.33333	4.07757	0.223413	1	1	1	RET;
Diminished visual acuity and myopia in heterozygous females	1	1	1.33333	24.2636	0.0412088	1	1	1	RPGR;
Disarray of neural tissue in muscularis propria	1	1	1.33333	24.2636	0.0412088	1	1	1	ACTG2;
Disarray of smooth muscle cells in lamina muscularis propria	1	1	1.33333	24.2636	0.0412088	1	1	1	ACTG2;
Disorganized speech	1	14	1.33333	1.74919	0.446397	1	1	1	CHI3L1;
Dissection, ascending aorta (in some patients)	1	1	1.33333	24.2636	0.0412088	1	1	1	MYH11;
Dissection, descending aorta (in some patients)	1	1	1.33333	24.2636	0.0412088	1	1	1	MYH11;
Distal limb muscle atrophy due to peripheral neuropathy	1	23	1.33333	1.06502	0.622396	1	1	1	PMP22;
Distal limb muscle weakness due to peripheral neuropathy	1	23	1.33333	1.06502	0.622396	1	1	1	PMP22;
Distal muscle weakness in lower limbs, severe	1	1	1.33333	24.2636	0.0412088	1	1	1	TCAP;
Distal sensory impairment	1	18	1.33333	1.3607	0.532853	1	1	1	PMP22;
Disturbed cone ERG	1	1	1.33333	24.2636	0.0412088	1	1	1	RPGR;
Does not lead to hepatic failure	1	1	1.33333	24.2636	0.0412088	1	1	1	UGT1A1;
Downslanted palpebral fissures	1	2	1.33333	12.1921	0.0807411	1	1	1	PRRX1;
Downslanting palpebral fissure	1	1	1.33333	24.2636	0.0412088	1	1	1	DHODH;
Downturned corners of mouth (63%)	1	1	1.33333	24.2636	0.0412088	1	1	1	WNT5A;
Downturned mouth	1	8	1.33333	3.05945	0.286319	1	1	1	GCK;
Dysarthria	2	118	2.66667	0.413268	0.962157	1	1	1	CHRNB1; GJA1;
Dysfunction of the autonomic nervous system	1	6	1.33333	4.07757	0.223413	1	1	1	RET;
Dysmorphic features	1	2	1.33333	12.1921	0.0807411	1	1	1	GRIA3;
Dysphagia	1	67	1.33333	0.36571	0.943473	1	1	1	CHRNB1;
Dystonia (may spontaneously remit in childhood or adolescence)	1	2	1.33333	12.1921	0.0807411	1	1	1	SGCE;
Dystopia canthorum	1	2	1.33333	12.1921	0.0807411	1	1	1	GJA1;
Dystrophic nail changes	1	1	1.33333	24.2636	0.0412088	1	1	1	HLA-C;
Dystrophic nails	1	14	1.33333	1.74919	0.446397	1	1	1	LAMC2;
Ear anomalies	1	1	1.33333	24.2636	0.0412088	1	1	1	PRRX1;
Early onset, mild and relatively uncomplicated course	2	2	2.66667	24.2636	0.00167644	1	0.712617	1	GCK; HNF4A;
Early onset patients are indistinguishable from those with carbamoyl phosphate synthetase I (CPS1) deficiency (	1	1	1.33333	24.2636	0.0412088	1	1	1	NAGS;
Early onset prostate cancer	1	12	1.33333	2.04048	0.397428	1	1	1	KLF6;
Ears	14	442	18.6667	0.769061	0.905642	1	1	1	WNT5A; FREM2; GCK; RET; TBX15; FOXC1; GJA1; DHODH; CDH23; PMP22; PRRX1; COL1A1; COL1A2; RIPK4;
Ears deficient in cartilage	1	3	1.33333	8.14159	0.118664	1	1	1	RET;
Easy bruisability	2	17	2.66667	2.86712	0.153143	1	1	1	COL1A1; COL1A2;
Echolalia	1	5	1.33333	4.89146	0.189939	1	1	1	HDC;
Ectopia lentis	1	10	1.33333	2.44817	0.344191	1	1	1	COL1A1;
Ectopic posterior pituitary	1	1	1.33333	24.2636	0.0412088	1	1	1	TBX3;
Ectopic upper canines	1	1	1.33333	24.2636	0.0412088	1	1	1	TBX3;
Ectropion	1	4	1.33333	6.11127	0.155043	1	1	1	DHODH;
Eczema	2	16	2.66667	3.04621	0.138673	1	1	1	IL4R; HPGD;
EEG shows epileptiform activity	1	4	1.33333	6.11127	0.155043	1	1	1	GCK;
EHLERS-DANLOS SYNDROME, AUTOSOMAL RECESSIVE, CARDIAC VALVULAR FORM	1	1	1.33333	24.2636	0.0412088	1	1	1	COL1A2;
EHLERS-DANLOS SYNDROME, TYPE I	1	3	1.33333	8.14159	0.118664	1	1	1	COL1A1;
EHLERS-DANLOS SYNDROME, TYPE VII, AUTOSOMAL DOMINANT	2	2	2.66667	24.2636	0.00167644	1	0.712617	1	COL1A1; COL1A2;
Elastosis perforans serpiginosa	1	1	1.33333	24.2636	0.0412088	1	1	1	ABCC6;
Electron Microscopy	1	27	1.33333	0.907301	0.681644	1	1	1	LAMC2;
Electrophysiologic studies show repetitive compound muscle action potentials (CMAP) in response to single stimulus	1	4	1.33333	6.11127	0.155043	1	1	1	CHRNB1;
Elevated calcitonin	1	1	1.33333	24.2636	0.0412088	1	1	1	RET;
Elevated lactate dehydrogenase	1	1	1.33333	24.2636	0.0412088	1	1	1	MYC;
Elevated plasma ACTH	1	2	1.33333	12.1921	0.0807411	1	1	1	MRAP;
Elevated plasma beta-sitosterol (sitosterolemia or phytosterolemia)	1	2	1.33333	12.1921	0.0807411	1	1	1	ABCG8;
Elevated plasma campesterol	1	2	1.33333	12.1921	0.0807411	1	1	1	ABCG8;
Elevated plasma stigmasterol	1	2	1.33333	12.1921	0.0807411	1	1	1	ABCG8;
Elevated serum bilirubin	1	1	1.33333	24.2636	0.0412088	1	1	1	UGT1A1;
Elevated uric acid	1	1	1.33333	24.2636	0.0412088	1	1	1	MYC;
Elongated clavicles	1	1	1.33333	24.2636	0.0412088	1	1	1	TBX15;
EMG shows decremental CMAP response to repetitive nerve stimulation	1	4	1.33333	6.11127	0.155043	1	1	1	CHRNB1;
Empty' vitreous with fibrillary condensations (childhood)	1	1	1.33333	24.2636	0.0412088	1	1	1	VCAN;
Enamel hypoplasia	3	27	4	2.70394	0.0968636	1	1	1	GJA1; LAMC2; CLDN1;
Enamel pitting	1	5	1.33333	4.89146	0.189939	1	1	1	LAMC2;
Encephalocele	1	4	1.33333	6.11127	0.155043	1	1	1	FREM2;
Endo	4	39	5.33333	2.49415	0.0735856	1	1	1	GCK; HNF4A; IL6; IRS2;
Endocrine	2	44	2.66667	1.10815	0.548997	1	1	1	OAS1; RET;
Endocrine Features	5	155	6.66667	0.78421	0.781559	1	1	1	SLC12A1; TBX3; GCK; RET; SRD5A2;
Enlarged cisterna magna (in some patients)	1	1	1.33333	24.2636	0.0412088	1	1	1	FOXC1;
Enlarged mandible	1	2	1.33333	12.1921	0.0807411	1	1	1	GJA1;
Enlargement of the feet	1	1	1.33333	24.2636	0.0412088	1	1	1	HPGD;
Enlargement of the hands	1	1	1.33333	24.2636	0.0412088	1	1	1	HPGD;
Enteric salmonellosis	1	5	1.33333	4.89146	0.189939	1	1	1	IFNGR1;
Enterocolitis	1	2	1.33333	12.1921	0.0807411	1	1	1	RET;
Enuresis	1	3	1.33333	8.14159	0.118664	1	1	1	FAM20A;
Environmental triggers include (Koebner's phenomenon), sunburn, HIV infection, beta-hemolytic streptococcal infection, certain medications, stress, and alcohol	1	1	1.33333	24.2636	0.0412088	1	1	1	HLA-C;
Ependymoma	1	6	1.33333	4.07757	0.223413	1	1	1	PMS2;
Epicanthal folds (39%)	1	1	1.33333	24.2636	0.0412088	1	1	1	WNT5A;
Epicanthal folds	2	61	2.66667	0.799373	0.727142	1	1	1	GJA1; COL1A1;
Epidermal hyperproliferation	1	1	1.33333	24.2636	0.0412088	1	1	1	HLA-C;
EPIDERMOLYSIS BULLOSA, JUNCTIONAL, HERLITZ TYPE	1	3	1.33333	8.14159	0.118664	1	1	1	LAMC2;
EPIDERMOLYSIS BULLOSA, JUNCTIONAL, NON-HERLITZ TYPE	1	5	1.33333	4.89146	0.189939	1	1	1	LAMC2;
Episodic hemolysis	1	2	1.33333	12.1921	0.0807411	1	1	1	ABCG8;
Episodic hypertension	1	8	1.33333	3.05945	0.286319	1	1	1	RET;
Erythrophagocytosis in late phase	1	1	1.33333	24.2636	0.0412088	1	1	1	LYST;
Esophageal motor dysfunction	1	1	1.33333	24.2636	0.0412088	1	1	1	ACTG2;
Evidence of anticipation	2	21	2.66667	2.32126	0.21339	1	1	1	CEBPA; MLF1;
Evidence of in utero fracture	2	2	2.66667	24.2636	0.00167644	1	0.712617	1	COL1A1; COL1A2;
Exacerbation at puberty	1	1	1.33333	24.2636	0.0412088	1	1	1	HPGD;
Exacerbation of symptoms during or after pregnancy	1	4	1.33333	6.11127	0.155043	1	1	1	CHRNB1;
Excessive salt in sweat	1	1	1.33333	24.2636	0.0412088	1	1	1	CA12;
Expanded diaphyses	1	1	1.33333	24.2636	0.0412088	1	1	1	HPGD;
Expanded metaphyses	1	1	1.33333	24.2636	0.0412088	1	1	1	HPGD;
Extensor finger muscle weakness	1	4	1.33333	6.11127	0.155043	1	1	1	CHRNB1;
External ear malformations	1	4	1.33333	6.11127	0.155043	1	1	1	FREM2;
External Features	10	180	13.3333	1.34925	0.20056	1	1	1	WNT5A; TBX3; AMACR; FREM2; TBX15; ACTG2; FOXC1; COL1A1; HPGD; RIPK4;
External Genitalia (Female)	4	50	5.33333	1.94555	0.147635	1	1	1	WNT5A; FREM2; TBX15; RIPK4;
External Genitalia (Male)	8	151	10.6667	1.28701	0.279489	1	1	1	WNT5A; TBX3; FREM2; TBX15; DHODH; COL1A2; RIPK4; SRD5A2;
Extrusion of calcium deposits ('perforating PXE')	1	3	1.33333	8.14159	0.118664	1	1	1	ABCC6;
Exuberant granulation tissue	1	3	1.33333	8.14159	0.118664	1	1	1	LAMC2;
Exudative vitreoretinopathy (in some patients)	1	1	1.33333	24.2636	0.0412088	1	1	1	VCAN;
Eyelid and corneal neuromas	1	1	1.33333	24.2636	0.0412088	1	1	1	RET;
Eyelid coloboma	1	2	1.33333	12.1921	0.0807411	1	1	1	DHODH;
Eyelid colobomata (in some patients)	1	1	1.33333	24.2636	0.0412088	1	1	1	RIPK4;
Eyes	28	826	37.3333	0.822778	0.940119	1	1	1	WNT5A; GRIA3; FRMD7; EDAR; CHRNB1; TBX3; CRYAA; TTC8; FREM2; ABCC6; GCK; RET; TBX15; EPHA2; TNFRSF1A; LYST; FOXC1; GJA1; DHODH; CDH23; PMP22; VCAN; RPGR; PRRX1; COL1A1; COL1A2; HPGD; RIPK4;
Face	16	433	21.3333	0.897115	0.737454	1	1	1	WNT5A; GRIA3; EDAR; FREM2; GCK; RET; KIF22; TBX15; FOXC1; GJA1; DHODH; PRRX1; COL1A1; COL1A2; HPGD; RIPK4;
Facial cleft	1	1	1.33333	24.2636	0.0412088	1	1	1	RIPK4;
Facial hirsutism	1	1	1.33333	24.2636	0.0412088	1	1	1	TBX15;
Facial palsy	1	5	1.33333	4.89146	0.189939	1	1	1	GJA1;
Failure to pass meconium in first 48 hours of life	1	1	1.33333	24.2636	0.0412088	1	1	1	RET;
Failure to thrive	5	202	6.66667	0.601755	0.933315	1	1	1	SLC12A1; NAGS; AMACR; CA12; LAMC2;
Failure to thrive in infancy	1	4	1.33333	6.11127	0.155043	1	1	1	RET;
Familial (10%) and isolated cases	1	1	1.33333	24.2636	0.0412088	1	1	1	RET;
Familial acute myelogenous leukemia (AML)	2	21	2.66667	2.32126	0.21339	1	1	1	CEBPA; MLF1;
Familial pheochromocytoma usually bilateral	1	8	1.33333	3.05945	0.286319	1	1	1	RET;
Family history of sudden death, as early as fourth decade of life	1	1	1.33333	24.2636	0.0412088	1	1	1	MYH11;
Favorable response to high-dose steroids	1	1	1.33333	24.2636	0.0412088	1	1	1	TNFRSF1A;
Favorable response to oral bile acid therapy	1	2	1.33333	12.1921	0.0807411	1	1	1	AMACR;
Favorable response to sodium chloride treatment	1	5	1.33333	4.89146	0.189939	1	1	1	CA12;
Feet	13	345	17.3333	0.914956	0.689599	1	1	1	WNT5A; TBX3; TTC8; RET; TBX15; GJA1; DHODH; PMP22; LAMC2; COL1A1; COL1A2; HPGD; RIPK4;
Felty syndrome	3	8	4	9.11777	0.00324346	1	1	1	PADI4; IL10; SLC22A4;
Femoral bowing present at birth, straightening with time	2	2	2.66667	24.2636	0.00167644	1	0.712617	1	COL1A1; COL1A2;
Fetal polyuria	1	3	1.33333	8.14159	0.118664	1	1	1	SLC12A1;
Fever	1	17	1.33333	1.44069	0.512578	1	1	1	SLC12A1;
Fever, periodic, recurrent	1	1	1.33333	24.2636	0.0412088	1	1	1	TNFRSF1A;
Fibrofatty replacement of right ventricular myocardium	1	1	1.33333	24.2636	0.0412088	1	1	1	TGFB3;
Fibrosis without fatty infiltration or ductular proliferation	1	1	1.33333	24.2636	0.0412088	1	1	1	CLDN1;
Fifth finger camptodactyly	1	2	1.33333	12.1921	0.0807411	1	1	1	GJA1;
Fifty percent of cases are sporadic	1	1	1.33333	24.2636	0.0412088	1	1	1	RET;
Filiform bands between mandible and maxilla	1	1	1.33333	24.2636	0.0412088	1	1	1	RIPK4;
Fine, dry hair	1	1	1.33333	24.2636	0.0412088	1	1	1	GJA1;
Fine, slow-growing hair	1	1	1.33333	24.2636	0.0412088	1	1	1	EDAR;
Fistulas	1	2	1.33333	12.1921	0.0807411	1	1	1	IL6;
Flat facial profile	1	4	1.33333	6.11127	0.155043	1	1	1	WNT5A;
Flat midface	1	8	1.33333	3.05945	0.286319	1	1	1	FOXC1;
Flat palate	1	1	1.33333	24.2636	0.0412088	1	1	1	WNT5A;
Flattened acetabulae and iliac wings	2	2	2.66667	24.2636	0.00167644	1	0.712617	1	COL1A1; COL1A2;
Flattened nose	1	4	1.33333	6.11127	0.155043	1	1	1	RET;
Fluoxetine therapy is effective	1	4	1.33333	6.11127	0.155043	1	1	1	CHRNB1;
Flushing	1	1	1.33333	24.2636	0.0412088	1	1	1	HPGD;
Flushing attacks	1	1	1.33333	24.2636	0.0412088	1	1	1	RET;
Focal degeneration of junctional folds ('honeycombed' appearance) see on muscle biopsy	1	4	1.33333	6.11127	0.155043	1	1	1	CHRNB1;
Foot deformities	1	18	1.33333	1.3607	0.532853	1	1	1	PMP22;
Foot drop	3	14	4	5.21294	0.0176321	1	1	1	TCAP; LYST; PMP22;
Foot infections leading to amputation	1	2	1.33333	12.1921	0.0807411	1	1	1	PMP22;
Foot ulcerations	1	2	1.33333	12.1921	0.0807411	1	1	1	PMP22;
Fracture frequency constant through childhood, decreases after puberty	1	1	1.33333	24.2636	0.0412088	1	1	1	COL1A1;
Fracture frequency increases after menopause and in men ages 60-80	1	1	1.33333	24.2636	0.0412088	1	1	1	COL1A1;
Fractures	2	8	2.66667	6.08861	0.0399384	1	1	1	COL1A1; COL1A2;
Fractures can occur in utero, during labor and delivery, or in newborn period	2	2	2.66667	24.2636	0.00167644	1	0.712617	1	COL1A1; COL1A2;
Fractures decrease after puberty but increase after menopause	2	2	2.66667	24.2636	0.00167644	1	0.712617	1	COL1A1; COL1A2;
Fractures occur in first few months, then decrease in frequency and then occur with ambulation	2	2	2.66667	24.2636	0.00167644	1	0.712617	1	COL1A1; COL1A2;
Fractures often heal without deformity	1	1	1.33333	24.2636	0.0412088	1	1	1	COL1A1;
Fragile nails	1	5	1.33333	4.89146	0.189939	1	1	1	LAMC2;
Fragile skin	1	4	1.33333	6.11127	0.155043	1	1	1	COL1A1;
FRASER SYNDROME	1	3	1.33333	8.14159	0.118664	1	1	1	FREM2;
Frequent pyogenic infections	1	1	1.33333	24.2636	0.0412088	1	1	1	RAB27A;
Frontal bossing	3	58	4	1.25898	0.431347	1	1	1	EDAR; COL1A1; COL1A2;
Frontal bossing (79%)	1	1	1.33333	24.2636	0.0412088	1	1	1	WNT5A;
Frontal proboscis	1	1	1.33333	24.2636	0.0412088	1	1	1	PRRX1;
Funnel chest	1	2	1.33333	12.1921	0.0807411	1	1	1	HPGD;
Furrowing of the forehead	1	1	1.33333	24.2636	0.0412088	1	1	1	HPGD;
Ganglion cell aggregates	1	1	1.33333	24.2636	0.0412088	1	1	1	ACTG2;
Ganglioneuroblastoma	1	8	1.33333	3.05945	0.286319	1	1	1	RET;
Ganglioneuroma	1	8	1.33333	3.05945	0.286319	1	1	1	RET;
Gastric cancer, diffuse type, poorly differentiated, high-grade submucosal lesions	2	4	2.66667	12.162	0.00952814	1	1	1	IL1B; IL1RN;
Gastrointestinal	15	425	20	0.856912	0.797636	1	1	1	SLC12A1; PMS2; NAGS; CHRNB1; TBX3; AMACR; TTC8; ABCC6; RET; CA12; IL6; ACTG2; DHODH; COL1A1; RIPK4;
Gastrointestinal hemorrhage	1	4	1.33333	6.11127	0.155043	1	1	1	ABCC6;
Generalized BCG infection after newborn inoculation	1	5	1.33333	4.89146	0.189939	1	1	1	IFNGR1;
Generalized lymphohistiocytic infiltrates in late phase	1	1	1.33333	24.2636	0.0412088	1	1	1	LYST;
Generalized muscle weakness due to defect at the neuromuscular junction	1	4	1.33333	6.11127	0.155043	1	1	1	CHRNB1;
Generalized weakness	1	3	1.33333	8.14159	0.118664	1	1	1	SLC12A1;
Genetic heterogeneity	8	142	10.6667	1.36857	0.225828	1	1	1	HMMR; FRMD7; IL6; FOXC1; TGFB3; CHI3L1; PMP22; LAMC2;
Genetic heterogeneity (see antenatal Bartter syndrome type 2,	1	1	1.33333	24.2636	0.0412088	1	1	1	SLC12A1;
Genetic heterogeneity (see CMT1B,	1	2	1.33333	12.1921	0.0807411	1	1	1	PMP22;
Genetic heterogeneity (see HHF1	1	3	1.33333	8.14159	0.118664	1	1	1	GCK;
Genetic heterogeneity, see LGMD2A (	1	1	1.33333	24.2636	0.0412088	1	1	1	TCAP;
Genetic heterogeneity (X-linked form	1	1	1.33333	24.2636	0.0412088	1	1	1	EDAR;
Gene valgum	1	1	1.33333	24.2636	0.0412088	1	1	1	GJA1;
Genitourinary	15	478	20	0.761901	0.921469	1	1	1	WNT5A; SLC12A1; TBX3; TTC8; FREM2; ABCC6; RET; TBX15; ACTG2; DHODH; COL1A2; FAM20A; RIPK4; SLC3A1; SRD5A2;
Genu recurvatum	1	4	1.33333	6.11127	0.155043	1	1	1	COL1A2;
Genu valgum	1	20	1.33333	1.2247	0.57094	1	1	1	KIF22;
GI	2	63	2.66667	0.774	0.743704	1	1	1	OAS1; IFNGR1;
Giant cell hepatitis on biopsy	1	1	1.33333	24.2636	0.0412088	1	1	1	AMACR;
Giant granules in muscle cells	1	1	1.33333	24.2636	0.0412088	1	1	1	LYST;
Giant granules in Schwann cells	1	1	1.33333	24.2636	0.0412088	1	1	1	LYST;
Giant inclusion bodies present in most granulated cells	1	1	1.33333	24.2636	0.0412088	1	1	1	LYST;
Giant melanosomes in melanocytes	1	1	1.33333	24.2636	0.0412088	1	1	1	LYST;
Giant platelets	1	3	1.33333	8.14159	0.118664	1	1	1	ABCG8;
GILBERT SYNDROME	1	1	1.33333	24.2636	0.0412088	1	1	1	UGT1A1;
Gingival hyperplasia (36%)	1	1	1.33333	24.2636	0.0412088	1	1	1	WNT5A;
Gingival overgrowth	1	1	1.33333	24.2636	0.0412088	1	1	1	FAM20A;
Gingivitis	1	4	1.33333	6.11127	0.155043	1	1	1	LYST;
Glaucoma	4	35	5.33333	2.77912	0.05295	1	1	1	CRYAA; FOXC1; GJA1; VCAN;
Glioblastoma	1	4	1.33333	6.11127	0.155043	1	1	1	PMS2;
Glucokinase gene defect	1	1	1.33333	24.2636	0.0412088	1	1	1	GCK;
Gonadal and somatic mosaicism reported in parent	2	2	2.66667	24.2636	0.00167644	1	0.712617	1	COL1A1; COL1A2;
Goniodysgenesis	1	1	1.33333	24.2636	0.0412088	1	1	1	FOXC1;
Gracile metacarpals	1	1	1.33333	24.2636	0.0412088	1	1	1	KIF22;
Granular layer hyperplasia	1	1	1.33333	24.2636	0.0412088	1	1	1	CLDN1;
Gray matter heterotopia (in some patients)	1	4	1.33333	6.11127	0.155043	1	1	1	PMS2;
Growth	19	609	25.3333	0.757377	0.953062	1	1	1	WNT5A; GRIA3; SLC12A1; NAGS; TBX3; AMACR; TTC8; GCK; RET; CA12; KIF22; TBX15; IL6; DHODH; LAMC2; COL1A1; COL1A2; HPGD; RIPK4;
GU	1	73	1.33333	0.335655	0.956534	1	1	1	OAS1;
Hair	9	240	12	0.910857	0.674728	1	1	1	EDAR; TBX3; FREM2; LYST; RAB27A; GJA1; CLDN1; RIPK4; SRD5A2;
Hallucinations	1	30	1.33333	0.816601	0.719966	1	1	1	CHI3L1;
Hammer toes	1	8	1.33333	3.05945	0.286319	1	1	1	PMP22;
Hammertoes	1	6	1.33333	4.07757	0.223413	1	1	1	PMP22;
Hands	13	349	17.3333	0.90447	0.706622	1	1	1	WNT5A; TBX3; TTC8; GCK; RET; KIF22; TBX15; GJA1; DHODH; PMP22; LAMC2; HPGD; RIPK4;
Head	7	345	9.33333	0.492993	0.993767	1	1	1	WNT5A; GRIA3; FRMD7; GCK; CASC5; GJA1; PRRX1;
Head and Neck	35	954	46.6667	0.890418	0.872093	1	1	1	WNT5A; GRIA3; FRMD7; EDAR; CHRNB1; TBX3; CRYAA; TTC8; FREM2; ABCC6; GCK; CASC5; RET; KIF22; TBX15; IL6; TNFRSF1A; LYST; IL1B; IL1RN; FOXC1; GJA1; DHODH; CDH23; PMP22; VCAN; LAMC2; PRRX1; CLDN1; COL1A1; COL1A2; FAM20A; HPGD; RIPK4; SGCE;
Head oscillations	1	1	1.33333	24.2636	0.0412088	1	1	1	FRMD7;
Hearing loss	2	41	2.66667	1.18922	0.510391	1	1	1	COL1A1; COL1A2;
Hearing loss, conductive	2	14	2.66667	3.48107	0.110783	1	1	1	GJA1; PRRX1;
Hearing loss, congenital profound	1	2	1.33333	12.1921	0.0807411	1	1	1	CDH23;
Hearing loss, profound prelingual sensorineural	1	2	1.33333	12.1921	0.0807411	1	1	1	CDH23;
Hearing loss, progressive conductive and/or sensorineural, during adulthood	1	1	1.33333	24.2636	0.0412088	1	1	1	COL1A1;
Hearing loss, sensorineural	1	38	1.33333	0.64473	0.801299	1	1	1	FOXC1;
Heart	11	351	14.6667	0.761066	0.884801	1	1	1	WNT5A; TBX3; TTC8; ABCC6; TCAP; FOXC1; TGFB3; MYH11; COL1A1; COL1A2; HPGD;
HEENT	1	28	1.33333	0.874909	0.694961	1	1	1	GJA1;
Height	9	290	12	0.753818	0.869226	1	1	1	WNT5A; GRIA3; SLC12A1; TBX3; RET; KIF22; TBX15; COL1A1; COL1A2;
Height often shorter than unaffected family members	1	1	1.33333	24.2636	0.0412088	1	1	1	COL1A1;
Helicobacter pylori infection susceptibility	1	2	1.33333	12.1921	0.0807411	1	1	1	IFNGR1;
HELICOBACTER PYLORI INFECTION, SUSCEPTIBILITY TO	1	2	1.33333	12.1921	0.0807411	1	1	1	IFNGR1;
Hematology	4	229	5.33333	0.424859	0.989893	1	1	1	AMACR; ABCG8; LYST; CLDN1;
Heme	6	78	8	1.8693	0.0981234	1	1	1	CEBPA; PADI4; IL10; SLC22A4; MLF1; IFNGR1;
Hemidesmosomal abnormalities	1	3	1.33333	8.14159	0.118664	1	1	1	LAMC2;
Hemophagocytic syndrome (HS) characterized by acute onset of uncontrolled T-lymphocyte and macrophage activation	1	1	1.33333	24.2636	0.0412088	1	1	1	RAB27A;
Hepatic amyloidosis	1	1	1.33333	24.2636	0.0412088	1	1	1	TNFRSF1A;
Hepatic fibrosis	1	27	1.33333	0.907301	0.681644	1	1	1	TTC8;
Hepatomegaly	3	130	4	0.561752	0.915098	1	1	1	AMACR; LYST; CLDN1;
High-arched palate	1	86	1.33333	0.284923	0.975479	1	1	1	HPGD;
High-arched palate (52%)	1	1	1.33333	24.2636	0.0412088	1	1	1	WNT5A;
High arched palate	3	32	4	2.28158	0.142289	1	1	1	TTC8; ABCC6; RET;
High incidence in Iraqis and Sephardic Jewish individuals	1	1	1.33333	24.2636	0.0412088	1	1	1	TNFRSF1A;
Hip dislocation	1	28	1.33333	0.874909	0.694961	1	1	1	GJA1;
Hips usually flexed and abducted (frog-leg position)	2	2	2.66667	24.2636	0.00167644	1	0.712617	1	COL1A1; COL1A2;
Hirschsprung disease	1	6	1.33333	4.07757	0.223413	1	1	1	RET;
Hirschsprung disease (	1	19	1.33333	1.28912	0.552296	1	1	1	TTC8;
Hirschsprung disease (16%)	1	6	1.33333	4.07757	0.223413	1	1	1	RET;
HLA antigens CW6, B13, B17 associated with psoriasis	1	1	1.33333	24.2636	0.0412088	1	1	1	HLA-C;
HLA-DRB1 association	3	8	4	9.11777	0.00324346	1	1	1	PADI4; IL10; SLC22A4;
Holoprosencephaly (variable)	1	1	1.33333	24.2636	0.0412088	1	1	1	PRRX1;
Hot, tender swelling of involved bones (e.g., mandible, ribs)	1	1	1.33333	24.2636	0.0412088	1	1	1	COL1A1;
Humeri, radii, ulnae bowing	1	1	1.33333	24.2636	0.0412088	1	1	1	GJA1;
Humoral deficiency (likely result of T-cell abnormalities)	1	1	1.33333	24.2636	0.0412088	1	1	1	RAB27A;
Hydranencephaly	1	4	1.33333	6.11127	0.155043	1	1	1	TBX15;
Hydrocephaly	1	6	1.33333	4.07757	0.223413	1	1	1	TBX15;
Hydronephrosis	3	38	4	1.92142	0.204147	1	1	1	WNT5A; TBX15; ACTG2;
Hyperactive deep tendon reflexes	1	1	1.33333	24.2636	0.0412088	1	1	1	GJA1;
Hyperactive renin-angiotensin system	1	3	1.33333	8.14159	0.118664	1	1	1	SLC12A1;
Hyperammonemia	1	17	1.33333	1.44069	0.512578	1	1	1	NAGS;
Hyperapobetalipoproteinemia	1	2	1.33333	12.1921	0.0807411	1	1	1	ABCG8;
Hyperbilirubinemia	1	6	1.33333	4.07757	0.223413	1	1	1	AMACR;
Hyperbilirubinemia, non-hemolytic unconjugated (may rise with fasting or dehydration)	1	1	1.33333	24.2636	0.0412088	1	1	1	UGT1A1;
Hyperbilirubinemia, unconjugated, 20-30mg/dl	1	1	1.33333	24.2636	0.0412088	1	1	1	UGT1A1;
Hyperbilirubinemia, unconjugated,	1	1	1.33333	24.2636	0.0412088	1	1	1	UGT1A1;
Hypercalciuria	1	17	1.33333	1.44069	0.512578	1	1	1	SLC12A1;
HYPERCHLORHIDROSIS, ISOLATED	1	1	1.33333	24.2636	0.0412088	1	1	1	CA12;
Hypercholesterolemia (elevated plasma cholesterol)	1	2	1.33333	12.1921	0.0807411	1	1	1	ABCG8;
Hyperextensible skin	2	8	2.66667	6.08861	0.0399384	1	1	1	COL1A1; COL1A2;
Hyperglycemia	2	16	2.66667	3.04621	0.138673	1	1	1	OAS1; GCK;
Hyperhidrosis	1	8	1.33333	3.05945	0.286319	1	1	1	HPGD;
Hyperinsulinemia	1	12	1.33333	2.04048	0.397428	1	1	1	GCK;
Hyperinsulinemic hypoglycemia	1	5	1.33333	4.89146	0.189939	1	1	1	GCK;
Hyperkalemia	1	8	1.33333	3.05945	0.286319	1	1	1	CA12;
Hypermobile	1	3	1.33333	8.14159	0.118664	1	1	1	COL1A1;
Hyperostosis of cranial vault	1	1	1.33333	24.2636	0.0412088	1	1	1	GJA1;
Hyperostosis of facial bones	1	1	1.33333	24.2636	0.0412088	1	1	1	GJA1;
Hyperparathyroidism	1	3	1.33333	8.14159	0.118664	1	1	1	RET;
Hyperpigmentation	1	10	1.33333	2.44817	0.344191	1	1	1	MRAP;
Hyperpigmented spots	1	4	1.33333	6.11127	0.155043	1	1	1	PMS2;
Hyperprostaglandinuria	1	2	1.33333	12.1921	0.0807411	1	1	1	SLC12A1;
Hypertelorism (100%)	1	2	1.33333	12.1921	0.0807411	1	1	1	WNT5A;
Hypertelorism	3	121	4	0.603531	0.887863	1	1	1	FREM2; FOXC1; GJA1;
Hypertelorism (in some patients)	1	4	1.33333	6.11127	0.155043	1	1	1	RIPK4;
Hypertension	2	57	2.66667	0.85546	0.691358	1	1	1	TTC8; RET;
Hypertensive retinopathy	1	8	1.33333	3.05945	0.286319	1	1	1	RET;
Hypertrophic nerve changes	1	6	1.33333	4.07757	0.223413	1	1	1	PMP22;
HYPERTROPHIC NEUROPATHY OF DEJERINE-SOTTAS	1	4	1.33333	6.11127	0.155043	1	1	1	PMP22;
Hypochloremia	1	4	1.33333	6.11127	0.155043	1	1	1	SLC12A1;
Hypodontia	6	51	8	2.85873	0.0164697	1	1	1	EDAR; TBX3; TTC8; FOXC1; LAMC2; CLDN1;
Hypoglossia	1	1	1.33333	24.2636	0.0412088	1	1	1	TBX15;
Hypoglycemia	1	55	1.33333	0.445486	0.90466	1	1	1	MRAP;
Hypoglycemia, nonketotic	1	1	1.33333	24.2636	0.0412088	1	1	1	GCK;
Hypogonadism (major)	1	19	1.33333	1.28912	0.552296	1	1	1	TTC8;
Hypohidrosis	1	5	1.33333	4.89146	0.189939	1	1	1	EDAR;
Hypokalemia	1	9	1.33333	2.71989	0.315858	1	1	1	SLC12A1;
Hypokalemic metabolic alkalosis	1	3	1.33333	8.14159	0.118664	1	1	1	SLC12A1;
Hyponatremia in infancy	1	1	1.33333	24.2636	0.0412088	1	1	1	CA12;
Hyponatremia usually associated with gastroenteritis	1	1	1.33333	24.2636	0.0412088	1	1	1	CA12;
Hyponatremic dehydration, episodic	1	1	1.33333	24.2636	0.0412088	1	1	1	CA12;
Hypoplasia of iliac wing (in some patients)	1	1	1.33333	24.2636	0.0412088	1	1	1	RIPK4;
Hypoplastic/absent/deformed radius	1	1	1.33333	24.2636	0.0412088	1	1	1	TBX3;
Hypoplastic/absent/deformed ulna	1	1	1.33333	24.2636	0.0412088	1	1	1	TBX3;
Hypoplastic clavicle	1	1	1.33333	24.2636	0.0412088	1	1	1	TBX3;
Hypoplastic epiglottis	1	3	1.33333	8.14159	0.118664	1	1	1	PRRX1;
Hypoplastic genitalia (in some patients)	1	1	1.33333	24.2636	0.0412088	1	1	1	RIPK4;
Hypoplastic humerus	1	2	1.33333	12.1921	0.0807411	1	1	1	TBX3;
Hypoplastic ilia	1	4	1.33333	6.11127	0.155043	1	1	1	TBX15;
Hypoplastic iliac wings	1	7	1.33333	3.49589	0.255521	1	1	1	TBX15;
Hypoplastic ischia	1	4	1.33333	6.11127	0.155043	1	1	1	TBX15;
Hypoplastic labia majora	1	7	1.33333	3.49589	0.255521	1	1	1	RIPK4;
Hypoplastic larynx	1	2	1.33333	12.1921	0.0807411	1	1	1	PRRX1;
Hypoplastic left heart	1	3	1.33333	8.14159	0.118664	1	1	1	GJA1;
Hypoplastic mandible (in some patients)	1	1	1.33333	24.2636	0.0412088	1	1	1	RIPK4;
Hypoplastic maxilla (in some patients)	1	1	1.33333	24.2636	0.0412088	1	1	1	RIPK4;
Hypoplastic nails	1	8	1.33333	3.05945	0.286319	1	1	1	RIPK4;
Hypoplastic nose	1	5	1.33333	4.89146	0.189939	1	1	1	RIPK4;
Hypoplastic, notched nares	1	3	1.33333	8.14159	0.118664	1	1	1	FREM2;
Hypoplastic oropharynx	1	1	1.33333	24.2636	0.0412088	1	1	1	PRRX1;
Hypoplastic pubic bone	1	1	1.33333	24.2636	0.0412088	1	1	1	TBX15;
Hypoplastic scapula	1	1	1.33333	24.2636	0.0412088	1	1	1	TBX3;
Hypoplastic scapulae	1	5	1.33333	4.89146	0.189939	1	1	1	TBX15;
Hypoplastic scapulae (in some patients)	1	2	1.33333	12.1921	0.0807411	1	1	1	RIPK4;
Hyporeflexia	2	75	2.66667	0.650177	0.826167	1	1	1	GRIA3; PMP22;
Hypospadias	1	55	1.33333	0.445486	0.90466	1	1	1	FREM2;
Hyposthenuria	1	2	1.33333	12.1921	0.0807411	1	1	1	SLC12A1;
Hypotonia	5	233	6.66667	0.521696	0.973025	1	1	1	RET; KIF22; PMP22; COL1A1; COL1A2;
Hypotonia in infancy	1	3	1.33333	8.14159	0.118664	1	1	1	COL1A1;
Hypotonia (rare)	1	2	1.33333	12.1921	0.0807411	1	1	1	SGCE;
Hypotrichosis	2	7	2.66667	6.95717	0.0307647	1	1	1	EDAR; CLDN1;
Hypoventilation occurs in the absence of primary neuromuscular, lung, or cardiac disease, or an identifiable brainstem lesion	1	6	1.33333	4.07757	0.223413	1	1	1	RET;
Hypsarrhythmia	1	12	1.33333	2.04048	0.397428	1	1	1	GCK;
IBD (Crohn or ulcerative colitis)	1	2	1.33333	12.1921	0.0807411	1	1	1	IL6;
ICHTHYOSIS, LEUKOCYTE VACUOLES, ALOPECIA, AND SCLEROSING CHOLANGITIS	1	1	1.33333	24.2636	0.0412088	1	1	1	CLDN1;
Identified by x-ray in the fetus in utero	1	1	1.33333	24.2636	0.0412088	1	1	1	COL1A1;
IgE level control	1	8	1.33333	3.05945	0.286319	1	1	1	IL4R;
Ileal, cecal, ovarian, and breast tumors, occasionally (endemic form)	1	1	1.33333	24.2636	0.0412088	1	1	1	MYC;
Immunologic	1	2	1.33333	12.1921	0.0807411	1	1	1	PTGER2;
Immunology	11	148	14.6667	1.80489	0.0364293	1	1	1	CHRNB1; OAS1; GCK; IL4R; PADI4; LYST; RAB27A; IL10; SLC22A4; PMP22; HLA-C;
Impaired platelet aggregation	1	2	1.33333	12.1921	0.0807411	1	1	1	ABCG8;
Impaired renal concentrating ability	1	1	1.33333	24.2636	0.0412088	1	1	1	FAM20A;
Impairment of dark adaptation with age	1	1	1.33333	24.2636	0.0412088	1	1	1	VCAN;
Imperforate hymen	1	1	1.33333	24.2636	0.0412088	1	1	1	TBX3;
Incidence - 1 in 25,000-100,000	1	3	1.33333	8.14159	0.118664	1	1	1	ABCC6;
Incidence is less than 1 in 70,000 births	1	1	1.33333	24.2636	0.0412088	1	1	1	PRRX1;
Incidence of 1 in 20,000	1	1	1.33333	24.2636	0.0412088	1	1	1	FRMD7;
Incomplete penetrance in carrier females	1	1	1.33333	24.2636	0.0412088	1	1	1	FRMD7;
Increased chloride levels	1	1	1.33333	24.2636	0.0412088	1	1	1	SLC12A1;
Increased chloride levels in sweat	1	1	1.33333	24.2636	0.0412088	1	1	1	CA12;
Increased connective tissue	1	2	1.33333	12.1921	0.0807411	1	1	1	TCAP;
Increased CSF protein	1	8	1.33333	3.05945	0.286319	1	1	1	PMP22;
Increased erythrocyte sedimentation rate	1	2	1.33333	12.1921	0.0807411	1	1	1	TNFRSF1A;
Increased levels of 3-alpha-7-alpha-12-alpha-trihydroxy-5-beta-cholestanoic acid (THCA) in bile, urine, and serum	1	1	1.33333	24.2636	0.0412088	1	1	1	AMACR;
Increased opening duration of acetylcholine receptor (AChR)-induced ion channels	1	4	1.33333	6.11127	0.155043	1	1	1	CHRNB1;
Increased plasma aldosterone	1	2	1.33333	12.1921	0.0807411	1	1	1	SLC12A1;
Increased plasma renin	1	3	1.33333	8.14159	0.118664	1	1	1	SLC12A1;
Increased risk of bilateral breast cancer	1	1	1.33333	24.2636	0.0412088	1	1	1	BRCA1;
Increased serum creatine kinase	1	32	1.33333	0.76558	0.742948	1	1	1	TCAP;
Increased serum glutamine	1	1	1.33333	24.2636	0.0412088	1	1	1	NAGS;
Increased serum osteocalcin	1	1	1.33333	24.2636	0.0412088	1	1	1	FAM20A;
Increased serum prostaglandin E2	1	2	1.33333	12.1921	0.0807411	1	1	1	SLC12A1;
Increased sweating	1	6	1.33333	4.07757	0.223413	1	1	1	RET;
Increased urinary chloride	1	4	1.33333	6.11127	0.155043	1	1	1	SLC12A1;
Increased urinary epinephrine	1	1	1.33333	24.2636	0.0412088	1	1	1	RET;
Increased urinary excretion of cystine	1	2	1.33333	12.1921	0.0807411	1	1	1	SLC3A1;
Increased urinary potassium	1	4	1.33333	6.11127	0.155043	1	1	1	SLC12A1;
Increased urinary prostaglandin E2	1	1	1.33333	24.2636	0.0412088	1	1	1	HPGD;
Increased variation in muscle fiber size	1	1	1.33333	24.2636	0.0412088	1	1	1	TCAP;
Increased white blood cell count	1	1	1.33333	24.2636	0.0412088	1	1	1	TNFRSF1A;
Increase urinary excretion of lysine, arginine, and ornithine	1	2	1.33333	12.1921	0.0807411	1	1	1	SLC3A1;
In-curving forearms	1	1	1.33333	24.2636	0.0412088	1	1	1	DHODH;
Inert uterus (rare)	1	1	1.33333	24.2636	0.0412088	1	1	1	ACTG2;
Inflammatory arthritis may develop in 30% of patients	1	1	1.33333	24.2636	0.0412088	1	1	1	HLA-C;
Infranumerary teeth (16%)	1	1	1.33333	24.2636	0.0412088	1	1	1	WNT5A;
Inguinal hernia (17%)	1	1	1.33333	24.2636	0.0412088	1	1	1	WNT5A;
Inguinal hernia	3	44	4	1.65947	0.271023	1	1	1	TBX3; COL1A1; COL1A2;
Inguinal pterygium, bilateral (in some patients)	1	1	1.33333	24.2636	0.0412088	1	1	1	RIPK4;
Inner circular layer of small bowel muscularis propria contains alpha-smooth muscle actin-positive inclusion bodies	1	1	1.33333	24.2636	0.0412088	1	1	1	ACTG2;
Insidious onset	1	11	1.33333	2.22581	0.371366	1	1	1	PMP22;
Insulin resistance	4	30	5.33333	3.24215	0.0323308	1	1	1	GCK; HNF4A; IL6; IRS2;
Intermittent claudication (30%)	1	3	1.33333	8.14159	0.118664	1	1	1	ABCC6;
Intermittent episodes of respiratory insufficiency due to muscle weakness	1	4	1.33333	6.11127	0.155043	1	1	1	CHRNB1;
Internal Genitalia (Female)	4	96	5.33333	1.0134	0.566888	1	1	1	TBX3; FREM2; ABCC6; ACTG2;
Internal Genitalia (Male)	7	148	9.33333	1.14916	0.410214	1	1	1	WNT5A; TTC8; FREM2; ACTG2; DHODH; RIPK4; SRD5A2;
Intolerance to heat and fever	1	1	1.33333	24.2636	0.0412088	1	1	1	EDAR;
Intracerebral cysts (in some patients)	1	4	1.33333	6.11127	0.155043	1	1	1	PMS2;
Intracytoplasmic vacuoles in basal keratinocytes (with negative oil red O-staining)	1	1	1.33333	24.2636	0.0412088	1	1	1	CLDN1;
Intracytoplasmic vacuoles in eosinophils, neutrophils and lymphocytes	1	1	1.33333	24.2636	0.0412088	1	1	1	CLDN1;
Intrahepatic cholestasis	1	7	1.33333	3.49589	0.255521	1	1	1	AMACR;
Intrauterine growth retardation	2	39	2.66667	1.25019	0.48351	1	1	1	GCK; RIPK4;
Inverted nipples	1	3	1.33333	8.14159	0.118664	1	1	1	TBX3;
Iridocorneal angle maldevelopment	1	1	1.33333	24.2636	0.0412088	1	1	1	FOXC1;
Iris anomalies	1	1	1.33333	24.2636	0.0412088	1	1	1	GJA1;
Iris hypoplasia	1	5	1.33333	4.89146	0.189939	1	1	1	FOXC1;
Iris strands attached to Schwalbe line bridging the iridocorneal angle	1	1	1.33333	24.2636	0.0412088	1	1	1	FOXC1;
Iris stromal hypoplasia	1	1	1.33333	24.2636	0.0412088	1	1	1	FOXC1;
Irregular, flared metaphyses with streaky sclerosis	1	1	1.33333	24.2636	0.0412088	1	1	1	KIF22;
Isolated cases	1	49	1.33333	0.500024	0.87635	1	1	1	MYC;
Jaundice	4	28	5.33333	3.47365	0.025698	1	1	1	AMACR; LYST; CLDN1; UGT1A1;
Jaundice, congenital nonhemolytic	1	1	1.33333	24.2636	0.0412088	1	1	1	UGT1A1;
Jaw and kidney tumor (endemic form)	1	1	1.33333	24.2636	0.0412088	1	1	1	MYC;
Joint arthralgia	1	2	1.33333	12.1921	0.0807411	1	1	1	ABCG8;
Joint dislocation (hip, shoulder, elbow, knee, or clavicle)	1	3	1.33333	8.14159	0.118664	1	1	1	COL1A1;
Joint hypermobility	1	11	1.33333	2.22581	0.371366	1	1	1	COL1A1;
Joint laxity	3	36	4	2.02814	0.182817	1	1	1	RET; KIF22; COL1A2;
Joint laxity, severe	2	2	2.66667	24.2636	0.00167644	1	0.712617	1	COL1A1; COL1A2;
Joints	3	23	4	3.17398	0.065859	1	1	1	PADI4; IL10; SLC22A4;
Junctional blister formation	1	5	1.33333	4.89146	0.189939	1	1	1	LAMC2;
Juvenile glaucoma	1	2	1.33333	12.1921	0.0807411	1	1	1	FOXC1;
Kaposi sarcoma	1	1	1.33333	24.2636	0.0412088	1	1	1	IL6;
KAPOSI SARCOMA, SUSCEPTIBILITY TO	1	1	1.33333	24.2636	0.0412088	1	1	1	IL6;
Kernicterus	1	1	1.33333	24.2636	0.0412088	1	1	1	UGT1A1;
Ketoacidosis	2	12	2.66667	4.06076	0.0846749	1	1	1	OAS1; GCK;
Kidneys	11	276	14.6667	0.96787	0.600252	1	1	1	WNT5A; SLC12A1; TTC8; FREM2; ABCC6; RET; TBX15; ACTG2; DHODH; FAM20A; SLC3A1;
Koebner phenomenon	1	1	1.33333	24.2636	0.0412088	1	1	1	HLA-C;
Kyphoscoliosis may be present	1	4	1.33333	6.11127	0.155043	1	1	1	PMP22;
Kyphoscoliosis may occur	1	5	1.33333	4.89146	0.189939	1	1	1	PMP22;
Kyphosis	4	56	5.33333	1.73713	0.196788	1	1	1	ABCC6; RET; COL1A1; COL1A2;
Lab	11	266	14.6667	1.00425	0.546944	1	1	1	OAS1; GCK; RET; HNF4A; IL4R; IL6; GJA1; IRS2; RPGR; COL1A1; UGT1A1;
Laboratory Abnormalities	18	712	24	0.613737	0.998406	1	1	1	SLC12A1; NAGS; AMACR; GCK; ABCG8; RET; TCAP; CA12; MRAP; MYC; TNFRSF1A; CHI3L1; COL1A2; FAM20A; HPGD; SLC3A1; SRD5A2; UGT1A1;
Lack of separation between circular and longitudinal layers of bowel wall	1	1	1.33333	24.2636	0.0412088	1	1	1	ACTG2;
Large anterior fontanel	1	11	1.33333	2.22581	0.371366	1	1	1	WNT5A;
Large anterior fontanelle	2	8	2.66667	6.08861	0.0399384	1	1	1	COL1A1; COL1A2;
Large follicles around developing teeth crowns	1	1	1.33333	24.2636	0.0412088	1	1	1	FAM20A;
Large fontanelles	2	13	2.66667	3.74864	0.0974756	1	1	1	COL1A1; COL1A2;
Large joint dislocations (especially knees)	1	1	1.33333	24.2636	0.0412088	1	1	1	KIF22;
Large, low-set ears	1	3	1.33333	8.14159	0.118664	1	1	1	RET;
Large, prominent eyebrow	1	1	1.33333	24.2636	0.0412088	1	1	1	RET;
Laryngeal atresia	1	3	1.33333	8.14159	0.118664	1	1	1	FREM2;
Laryngeal stenosis	1	5	1.33333	4.89146	0.189939	1	1	1	FREM2;
Larynx	3	46	4	1.58734	0.293921	1	1	1	TBX3; FREM2; PRRX1;
Late onset	4	31	5.33333	3.1376	0.0359912	1	1	1	GCK; HNF4A; IL6; IRS2;
Learning disabilities (major)	1	19	1.33333	1.28912	0.552296	1	1	1	TTC8;
Left ventricular failure	1	1	1.33333	24.2636	0.0412088	1	1	1	MYH11;
Left ventricular hypertrophy	1	26	1.33333	0.942184	0.667754	1	1	1	TTC8;
Lesions apparent at birth	1	3	1.33333	8.14159	0.118664	1	1	1	LAMC2;
Lethargy	1	64	1.33333	0.38285	0.93556	1	1	1	NAGS;
Leukemia	1	8	1.33333	3.05945	0.286319	1	1	1	PMS2;
Leukopenia	1	15	1.33333	1.63266	0.469387	1	1	1	LYST;
Lifetime risk of breast cancer in mutation carriers is 80 to 90%	1	1	1.33333	24.2636	0.0412088	1	1	1	BRCA1;
Lifetime risk of ovarian cancer in mutation carriers is 40 to 50%	1	1	1.33333	24.2636	0.0412088	1	1	1	BRCA1;
Limb contractures	1	5	1.33333	4.89146	0.189939	1	1	1	GCK;
Limbs	15	339	20	1.07429	0.425085	1	1	1	WNT5A; TBX3; FREM2; ABCG8; RET; KIF22; TBX15; PADI4; IL10; SLC22A4; GJA1; DHODH; COL1A1; COL1A2; HPGD;
Liver	5	256	6.66667	0.474827	0.986935	1	1	1	TTC8; ABCG8; TNFRSF1A; LYST; CLDN1;
Long bone deformity evident at birth or in the first 2 years of life	2	2	2.66667	24.2636	0.00167644	1	0.712617	1	COL1A1; COL1A2;
Long clavicles	1	3	1.33333	8.14159	0.118664	1	1	1	HPGD;
Long eyelashes (54%)	1	1	1.33333	24.2636	0.0412088	1	1	1	WNT5A;
Long, narrow nose	1	1	1.33333	24.2636	0.0412088	1	1	1	GJA1;
Long philtrum	1	54	1.33333	0.453735	0.900432	1	1	1	GCK;
Long philtrum (65%)	1	1	1.33333	24.2636	0.0412088	1	1	1	WNT5A;
Long, slender middle and proximal phalanges	1	1	1.33333	24.2636	0.0412088	1	1	1	KIF22;
Lop ears	1	6	1.33333	4.07757	0.223413	1	1	1	COL1A1;
Lordosis	1	15	1.33333	1.63266	0.469387	1	1	1	RET;
[truncated: 731 more rows]

## Sheet: COSMIC
Analysis: COSMIC
Dataset name: NH
[truncated: 33 more rows]
